## Evolutionary dynamics of microbial communities in bioelectrochemical systems.

Lukasz Szydlowski<sup>1</sup>\* | Anatoly Sorokin<sup>2,3</sup> | Olga Vasieva<sup>4</sup> | Veyacheslav Fedorovich<sup>1</sup> | Igor Goryanin<sup>1,5,6</sup>

---

<sup>1</sup> Okinawa Institute of Science and Technology, Japan

\* Correspondence: Okinawa Institute of Science and Technology, Japan Email: lukasz.szydlowski@oist.jp ; Phone: +81-(0)98-982-3420

<sup>2</sup> Institute of Cell Biophysics, Russia

<sup>3</sup> Institute of Physics and Technology, Russia

<sup>4</sup> University of Liverpool, United Kingdom

<sup>5</sup> The School of Informatics, University of Edinburgh, United Kingdom

<sup>6</sup> Tianjin Institute for Industrial Biotechnology, China

## SUMMARY

Bio-electrochemical systems can generate electricity by virtue of mature microbial consortia that gradually and spontaneously optimize performance. To understand selective enrichment of these electrogenic microbial communities, we set up five, 3-electrode reactors using the same inoculum derived from rice wash wastewater and incubated them under a range of applied potentials. We sampled reactors and extracted DNA from anodal, cathodal, and planktonic bacterial communities over 12 weeks. Using a custom-made bioinformatics pipeline, we combined 16S and metagenomic samples to analyze temporal changes in a community composition. We observed some genera that constituted a minor proportion of the initial inoculum, but that within weeks dominated the communities. Our study shows a correlation between community structure and applied potential. For instance, the abundance of *Geobacter* increased from 423-fold to 766-fold between -153 mV and 147 mV, respectively. Full metagenomic profiles of bacterial communities were obtained from reactors operating for 12 weeks. Functional analyses of metagenomes revealed metabolic changes between different species of the dominant genus, *Geobacter*, suggesting that optimal nutrient utilization at the lowest electrode potential is achieved via genome rearrangements and a strong inter-strain selection, as well as adjustment of the characteristic syntrophic relationships. Our observations reveal a certain degree of metabolic plasticity of electrochemically active bacteria and their communities in adaptation to adverse anodic and cathodic environments.

## 1 1 | INTRODUCTION

2 Bio-electrochemical Systems (BESs) refer to microbial communities that either generate electricity, as in  
3 Microbial Fuel Cells (MFCs) or utilize electricity, as in Microbial Electrolysis Cells (MECs) (Santoro *et al.*,  
4 2017; Rittmann and Asce, 2017). BES is a well-known technology allowing simultaneous wastewater  
5 treatment and electricity production. BES performance depends on activities of electrode-associated  
6 bacteria (EAB) that form biofilms on anodal surfaces (e.g. Allen and Bennetto, 1993). Various factors  
7 account for EAB enrichment: organic substrates, pH, temperature, electrode composition, and electrical  
8 potential (Logan *et al.*, 2006; Aelterman *et al.*, 2008; Torres *et al.*, 2009; Dennis *et al.*, 2016; Rittmann  
9 and Asce, 2017).

10 EAB reach maximum power density when reactors operate at near-neutral pH, at ambient temperatures  
11 (25-40°C), and are fed with acetate. Although some studies indicate optimum electrode potentials at ca.  
12 0.3 mV in comparison with a standard hydrogen electrode (SHE) (Aelterman *et al.*, 2008), based upon  
13 thermodynamics of acetate consumption, others have found that the most efficient EAB prefer lower  
14 anode potentials (Torres *et al.*, 2009). Microbial communities used to inoculate BESs were derived  
15 mainly from sludge from wastewater treatment plants (Torres *et al.*, 2009; Ishii *et al.*, 2013; Paitier *et al.*,  
16 2017), aquatic sediments (Holmes *et al.*, 2004), biogas digestate (Daghio *et al.*, 2015), and various  
17 environmental samples (e.g. Yates *et al.*, 2012; Ieropoulos *et al.* 2010). EAB are abundant in many  
18 environments, such that virtually all environmental inocula can eventually give rise to stable EAB  
19 consortia within 60 days (Yates *et al.*, 2012). However, further changes and details of community  
20 structure are not well understood.

21 Previous studies analyzed changes within microbial populations for up to several weeks (reviewed in  
22 Daghio *et al.*, 2015; Philips *et al.*, 2015; Khater *et al.*, 2017), and employed mainly 16S sequencing (Ishii  
23 *et al.*, 2013; Ishii *et al.*, 2014; Dennis *et al.*, 2016), Ribosomal Intergenic Spacer Analysis (RISA) (Paitier *et*  
24 *al.*, 2017), or Denaturing Gradient Gel Electrophoresis (DGGE) (Beecroft *et al.*, 2012). In another study,

25 community shifts were tracked during 90-days of operation (Beecroft *et al.*, 2012). However, those  
26 reactors were fed with sucrose, which cannot be metabolized as efficiently (e.g. Schroder, 2007), as  
27 acetate (Bond *et al.*, 2002; Bond and Lovley, 2003; Logan *et al.*, 2006; Fedorovich *et al.*, 2009; Daghighi *et al.*, 2015). Sucrose-fed systems developed fermentative communities that did not participate in electron  
28 transfer. Nevertheless, these population studies may significantly underestimate microbial diversity,  
29 with novel taxonomic groups not detected due to low compatibility with universal primers (e.g. Poretsky  
30 *et al.*, 2014; Roselli *et al.*, 2016). Moreover, the type of inoculum also influences community  
31 development. In our previous work (Khylias *et al.*, 2015), we showed that electrogenic communities  
32 derived from different sources exhibit different properties in terms of COD consumption, coulombic  
33 efficiencies, etc. Therefore, communities present in particular waste streams should already contain  
34 some electrogenic bacterial taxa. The minimal number of EAB is unknown and it remains unclear  
35 whether conclusions drawn by Yates *et al.* (2012) are valid for all inocula. Thus, complex studies,  
36 examining long-term community changes across a range of EAB-selective electrode potentials have not  
37 been attempted.

39 In this study, we investigated enrichment of EAB from rice wash inoculum in single-chamber, three-  
40 electrode BES. We normalized conditions among reactors utilizing acetate feeding to eliminate  
41 metabolic pathways other than that directly relevant to electrogenic respiration. We then applied a  
42 range of potentials, from 147 mV to -153 mV vs SHE on anodes and tracked compositional and  
43 functional changes in the resulting bacterial communities using detailed metagenomics.

## 44 **2 | RESULTS**

### 45 **2.1 | Conditions within reactors**

46 The single-chamber, 3-electrode BES reactors (M1-M4) were connected to a potentiostat to apply fixed

47 potentials (147 mV to -153 mV vs SHE) to the working electrodes (anodes). We also measured potentials  
48 observed (792 mV to 1182 mV vs SHE) on counter electrodes (cathodes). In addition, we prepared one  
49 reactor (M5) with only one set of electrodes to operate under open circuit potential (OCP) (Table 1). Our  
50 BESs were designed to develop electroactive biofilms, with high volume-to-electrode surface ratios in  
51 order to minimize nutrient limitations. Thus, after setting a constant potential, the potentiostat  
52 maintained current flow automatically and we did not measure current. One channel of the  
53 potentiostat, attached to reactor M3, exhibited an overload error after 8 weeks of operation, resulting  
54 in turbidity. This caused shift in community structure (Fig. S2); hence, we excluded this reactor from our  
55 analysis.

| Reactor | Potential A (mV)       | Potential C (mV) |
|---------|------------------------|------------------|
| M1      | 147                    | 792              |
| M2      | 47                     | 972              |
| M3*     | -53                    | 1082             |
| M4      | -153                   | 1182             |
| M5      | 0 to -333 <sup>a</sup> | NA               |

56  
57 **Table 1.** Potentials (measured with Ag/AgCl reference electrode in saturated KCl; +0.197 mV vs SHE) vs. SHE on  
58 anode (**A**) and cathode (**C**) of each reactor. <sup>a</sup> Potentials measured in control (OCP) reactor after every 2 weeks. \*  
59 Around week 8, we experienced technical fault in M3, resulting in overcharge of the reactor, which caused shift in  
60 the microbial community; results for this reactor are in Fig. S2 in supplementary material.  
61

## 62 **2.2 | Community analysis**

63 Samples were collected every two weeks from anodes (M1-5A), cathodes (M1-4C) and planktonic (free  
64 swimming) fractions (M1-5P). Microscopic imaging (Fig.1) revealed that anodes from M1-M4 reactors  
65 developed communities that formed thick biofilms (Fig. 1a-c), and they were more abundantly  
66 populated than cathodes (Fig. 1e-g). No comparable community formed on electrode strips in M5 (Fig.  
67 1d), due to its OCP mode. Negative charge accumulation on the electrode eventually inhibited microbial  
68 growth (Table 1).

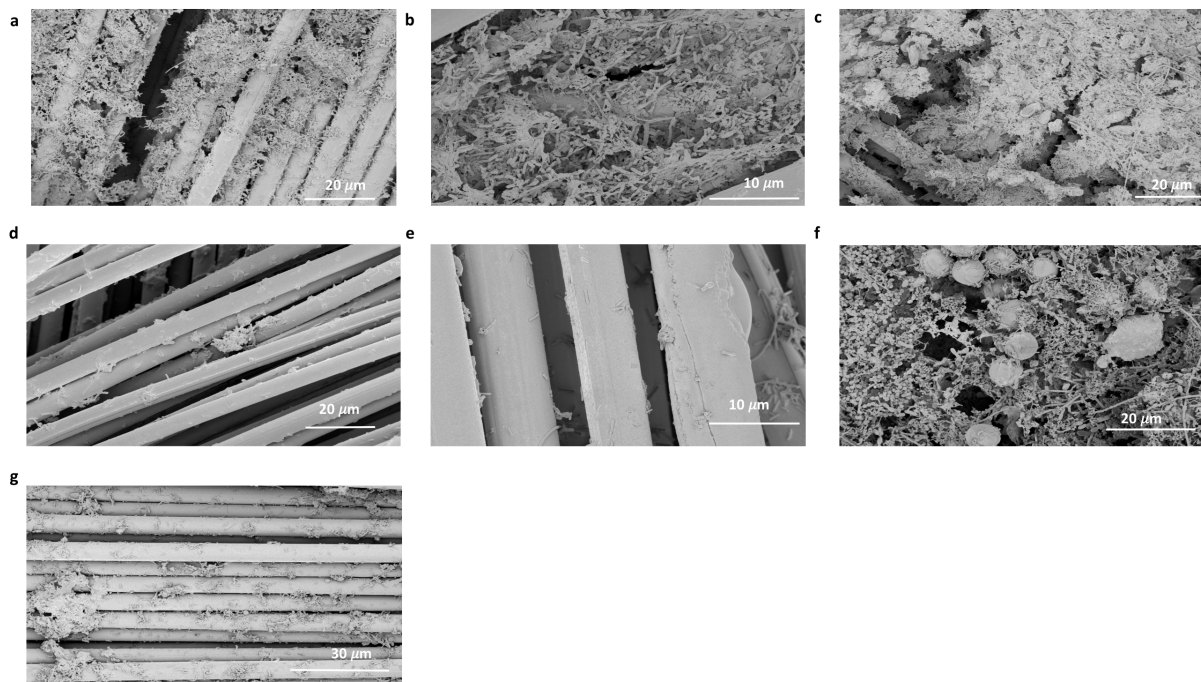

69

70 **Fig. 1.** SEM images of electrodes from a) M1A, b) M2A, c) M4A d) M5A e) M1C, f) M2C and g) M4C after 12 weeks  
71 of operation. Scale bars are included.

72

### 73 2.3 | Taxonomic analysis of anodes

74 We analyzed organismal abundances on each anode (Fig.2) during the 12-week operation, and  
75 compared them with initial community compositions (Table S2). Rice inoculum is nutrient-rich, although  
76 numbers of electrogenic taxa are very low, with *Geobacter* and *Shewanella* spp., two of the most  
77 efficient EABs, comprising less than 0.09% and 0.02% of the total communities, respectively. Enrichment  
78 data indicated that the abundance of *Geobacter* spp. rapidly increased over the first 6-8 weeks under  
79 poised anode potential (M1-4). Then, growth rates plateaued and the change in abundance of  
80 *Geobacter* after 12 weeks was 766-fold, 598-fold and 423-fold in M1A, M2A and M4A, respectively,  
81 whereas in M5A it only increased 1.2-fold. The relative abundance of *Geobacter* was significantly higher  
82 (ANOVA,  $p < 0.05$ ) on M1A at 147 mV and decreased with decreasing potential. After 12 weeks of  
83 operation, the abundance of *Shewanella* remained unchanged in all reactors. Control reactor M5  
84 showed an oscillating pattern of the most abundant genera *Methanosaeta*, *Methanobacterium*, and  
85 *Acinetobacter*, with an opposite oscillation pattern of *Prevotella* (Fig.2d), although the changes are not  
86 as significant as in the other reactors. With regard to generic abundance differences between the  
87 reactors, for M1A, *Geobacter* was the only genus with an abundance over 1%. M2A had 2 such genera  
88 (*Geobacter* and *Denitrovibrio*) and in reactor M4 and M5 anodes, the number of significantly abundant  
89 (i.e. > 1%) genera reached 10. Initially, 5 genera showed abundances >1%.

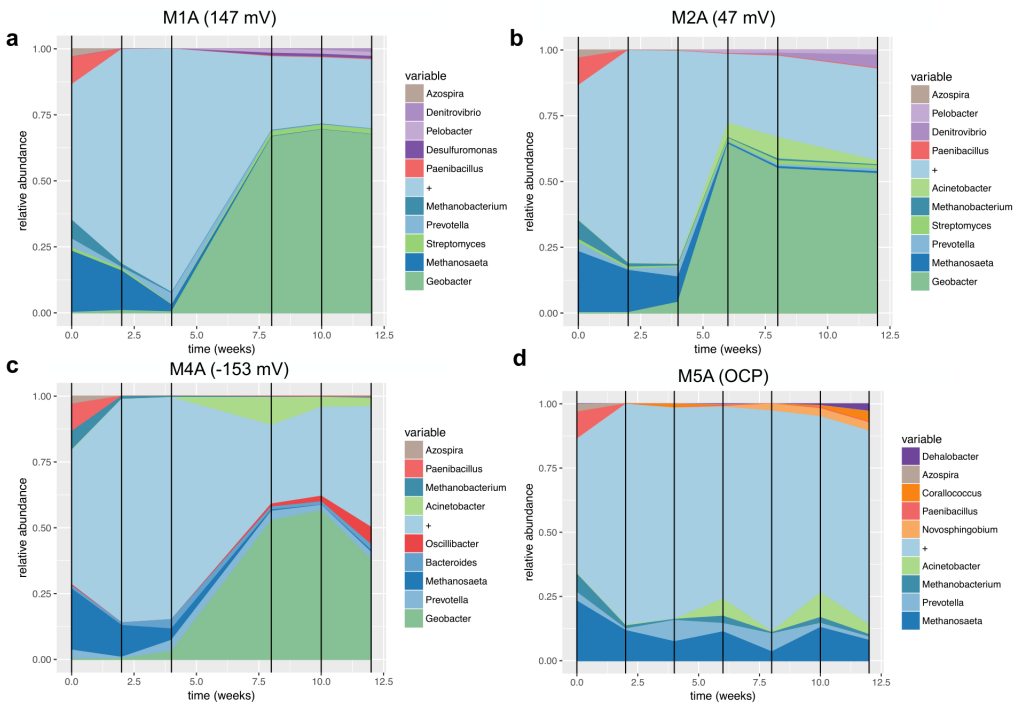

90

91 **Fig. 2.** Relative abundances of dominant genera collected from a) M1A, b) M2A, c) M4A and d) M5A during the  
92 experiment. Colors represent taxonomic groups, + - other organisms.

93

## 94 **2.4 | Taxonomic analysis of cathodes**

95 On the M1 and M2 cathodes, the most abundant organisms were methanogenic archaea (Fig.3a-b);  
96 however, a proportion of *Methanoseta*, the most abundant methanogenic genus from the initial  
97 inoculum decreased during the course of the experiment, with subsequent growth of *Methanobacter*  
98 spp. The growth of the latter was in turn inversely correlated with that of *Methanoregula*. Contrarily,  
99 *Geobacter* was the most abundant genus on M4C, reaching a peak abundance of 16%, 12 weeks after  
100 inoculation, a level four times higher than that of the next most abundant genus, *Methanobacterium*



101 (Fig.3c). *Geobacter* remained scarce on the M1 and M2 cathodes (< 0.1%), not exceeding its abundance  
102 in the inoculum. On the M4 cathode, a rapid increase in its abundance after 10 weeks was accompanied  
103 by a concomitant decrease of *Acinetobacter* from 25% to 2.5% (Fig.3c).

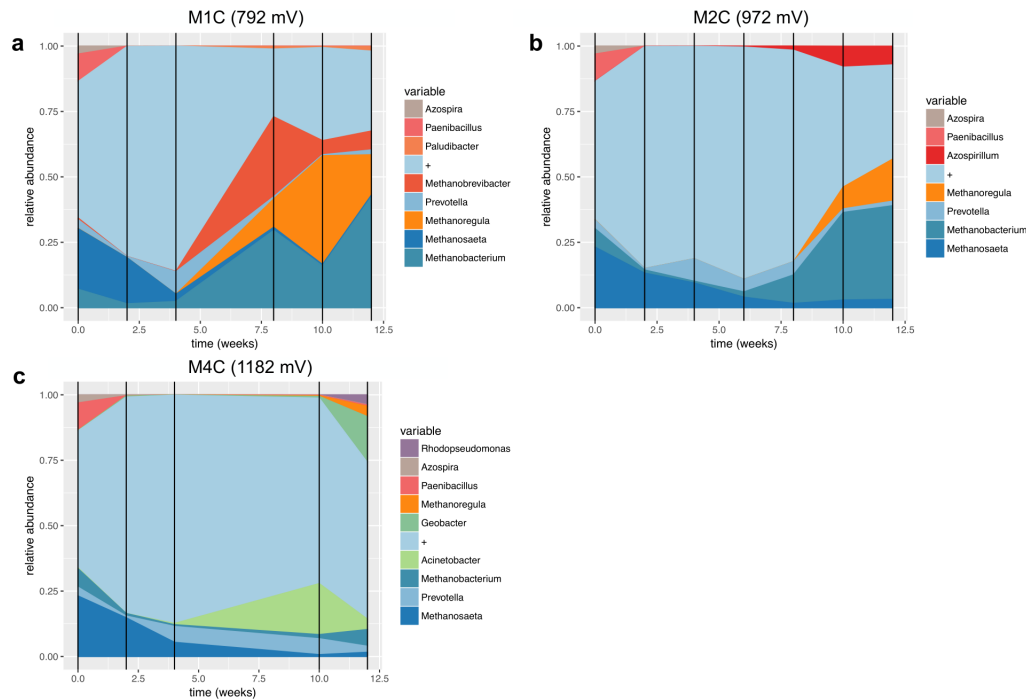

104

105 **Fig. 3.** Relative abundances of top genera collected a) M1C, b) M2C and c) M4C during the experiment. Colors  
106 represent taxonomic groups, + - other organisms.

107

## 108 2.5 | Taxonomic analysis of planktonic taxa

109 In the case of planktonic samples (Fig.4), a pattern of sudden growth around week 8, similar to that  
110 observed on M1A (although with much lower abundances) was observed with the genera, *Pelomonas*,  
111 *Paludibacter*, and *Bacteroides* in M1P. In all planktonic samples, *Methanosaeta*, the most abundant

112 genus in the inoculum (Table S1), decreased within the first weeks of operation, as did *Porphyromonas*  
113 and *Azospirillum*. The proportion of *Pelomonas*, a genus comprising 0.01% of initial community, rose to  
114 about 20% of the total planktonic community in M2. In M5P, abundances did not reflect the initial  
115 community profile, as *Methanosaeta* decreased within 4 weeks from 24 % to ~1%, whereas *Azospirillum*  
116 abundance reached ~25%.

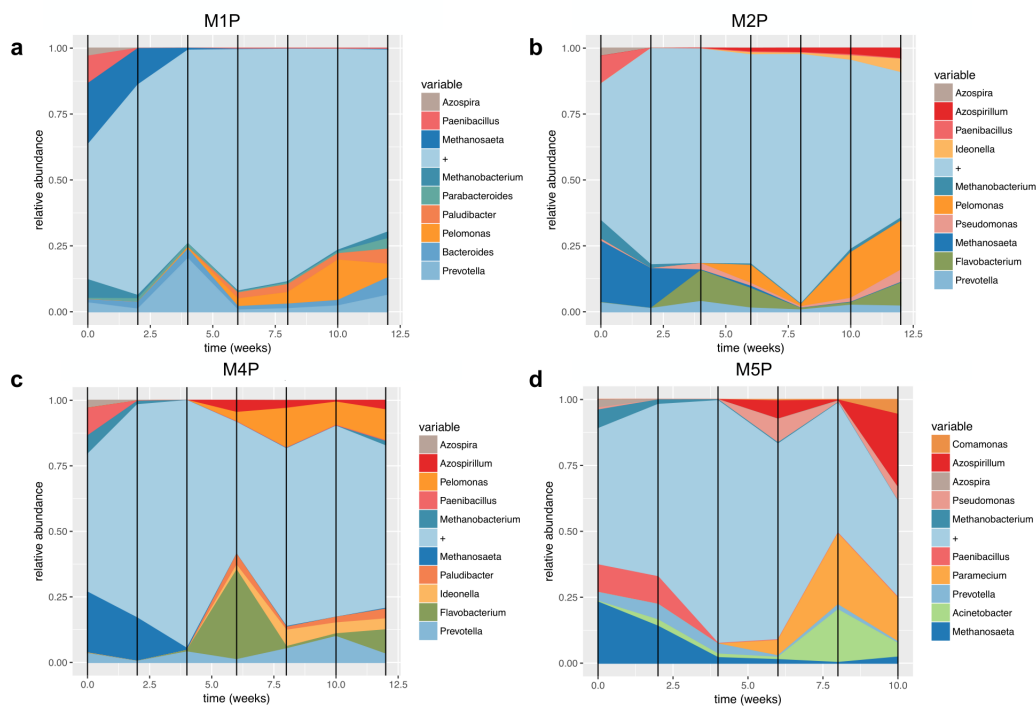

117

118 **Fig. 4.** Relative abundances of dominant genera collected from a) M1P b) M2P c) M4P and d) M5P during the  
119 experiment. Colors represent taxonomic groups, + - other organisms.

120

## 121 2.6 | Abundances of unclassified organisms

122 After 12 weeks of reactor operation, we compared the percentage of unclassified reads (at the

123 generic level) from each metagenome to that from the initial inoculum (Fig. 5). Results indicate  
124 almost a 2-fold increase of unclassified taxa after 12 weeks in all sampled metagenomes, with  
125 the highest being reported in M4P (34.9%), followed by M1P (31.9%) and M5P (30.0%), with  
126 17% of unclassified genera in the initial inoculum.

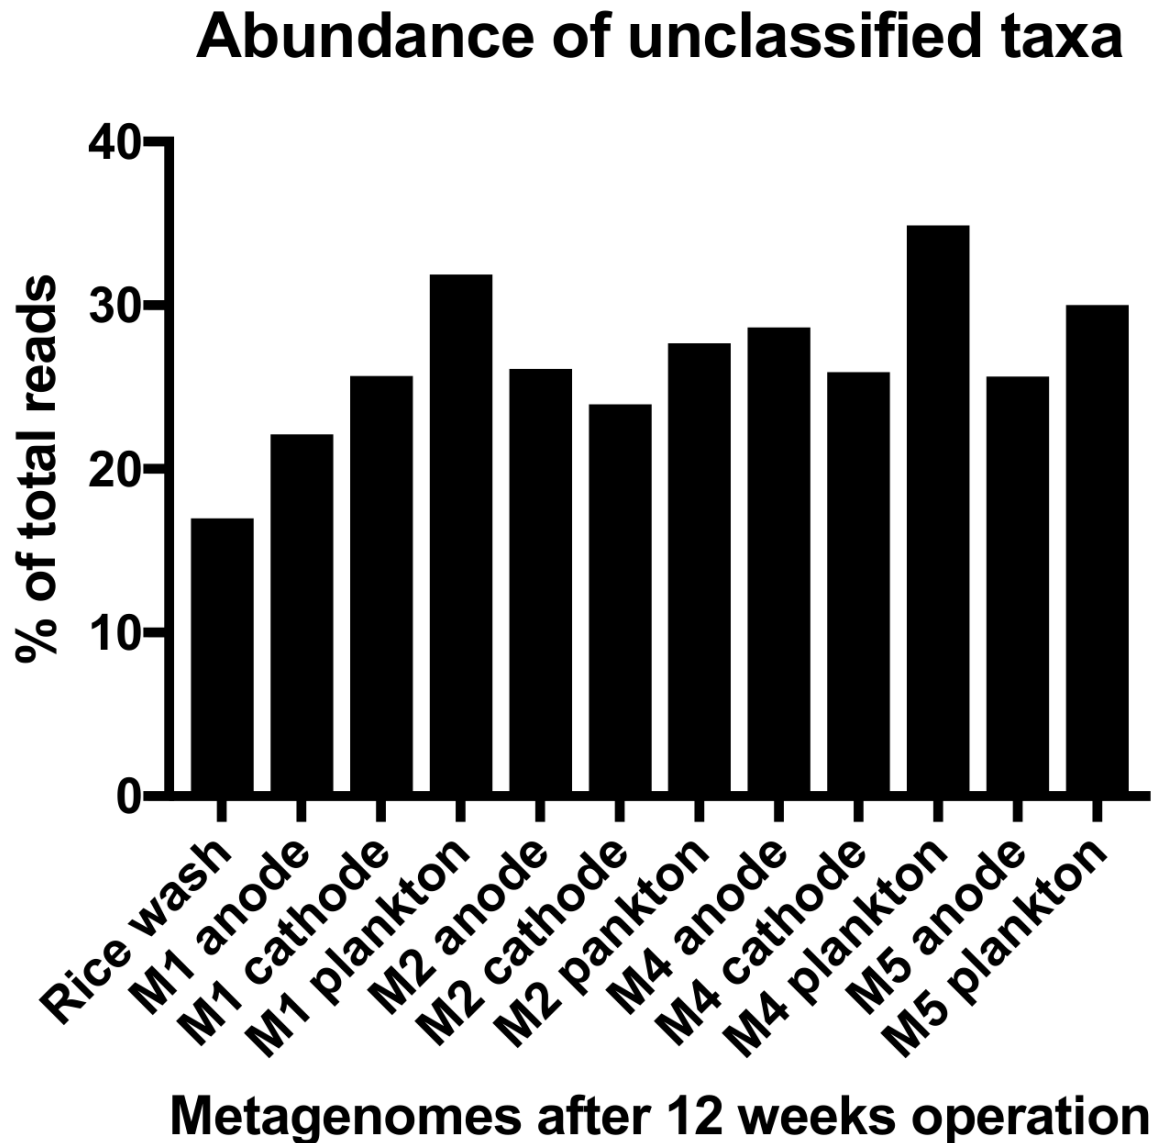

127

128 **Fig. 5.** Abundances of unclassified taxa (genera) after 12 weeks of operation, compared to the initial inoculum.

129

## 130 **2.7 | Functional overview of metagenomes**

131 Metagenomic analysis also revealed changes in abundances of functions mapped to the  
132 genomes and identified via PALADIN analysis, with mainly *Methanosaeta* functions being  
133 ranked in the top 200 by read count for initial communities and the M5 reactor (Tables S3 and  
134 S7, respectively). *Geobacter* functions dominated the ranked lists for M1, M2, and M4 reactors.  
135 We compared abundances in greater detail and ranked the top 200 *Geobacter* functions from  
136 each reactor (Supplementary tables S3-S7). The main abundance trend defined by the  
137 taxonomic analysis, correlates with the occurrence of *Geobacter* spp. in reactors, with counts  
138 for almost all mapped genes decreasing in the order M1, M4, M2, and M5 (the lowest).  
139 However, we also noticed changes in ranks (defined by a mapped-read count) of several *G.*  
140 *metallireducens* and *G. sulfurreducens* genes that may reflect changes in the proportion of  
141 these functionally significant genes in *Geobacteraceae* populations in different reactors. The  
142 rank of each gene was established in relation to the normalised abundance of its mapped reads  
143 (See Methods for a gene/function abundance calculation) for each species. The function with  
144 the highest number of mapped reads was assigned a rank of 1. Functions with lower numbers  
145 of mapped reads had lower ranks with larger assigned values. We conclude that the  
146 comparative rank measurement gives a better estimate of a functional genomic shift for a  
147 particular metagenome in relation to a reactor condition. Comparisons between ranks at M4A  
148 and M1A reveal that 14 genes have increased ranks in M4A, whereas those of 17 genes  
149 decreased (Table 2). An increase in rank order suggests potentially favourable genomic  
150 changes and may help to identify species-specific significant functions for specific reactor

151 conditions. The comparative nature of the analysis also helps to avoid biases caused by gene  
 152 length due to translation of the number of reads into a gene presentation ratio. Interestingly,  
 153 the results of such a comparison of *Geobacter* fractions at the M1 and M4 metagenomes (Table  
 154 2) revealed potential positive selection of bacteria for functions/genes involved in electrogenic  
 155 metabolism. Metagenomic changes in *G. sulfurreducens* were related to genes encoding ATP  
 156 synthase, NADH-quinone oxidoreductase, and the acetate utilization pathway, with 2-fold, 1.8-  
 157 fold, and 1.5-fold rank increases in M4A compared to M1A (Table 2a). Conversely, *G.*  
 158 *sulfurreducens* genes encoding ATPase (*prkA*), citramalate synthase (*cimA*), sodium symporter  
 159 (*aplC*), aldehyde dehydrogenase (*aldh*), and Fe-S binding protein increased 4-fold, 2.02-fold, 2-  
 160 fold, 1.52-fold, and 1.51-fold in rank in M1A, respectively (Table 2b). Changes in the *G.*  
 161 *metallireducens* metagenome included a wide range of functions involved in conductive pilin  
 162 assembly (*pilB*), flagella biosynthesis regulation (*fgrM*), pyruvate metabolism (*leuA*), and  
 163 electron transfer (*nuoB/C/G/L* and *por*), utilization of ammonia (*carb-1*) efflux pump (*cusA*), and  
 164 aspartokinase (*asd-1*) between 2-fold and 1.5-fold in M4A (Table 2a), whereas periplasmic Ni-Fe  
 165 dehydrogenase (*hybL*) and NADH-quinone oxidoreductase (*nuoD*) show 1.95 and 1.76 fold  
 166 increase in M1A (Table 2b).

167 a)

| Hit ID                  | Protein                                             | Organism                  | Rank               | Rank change ratio |
|-------------------------|-----------------------------------------------------|---------------------------|--------------------|-------------------|
| A0A0B5BDJ5              | NADH-quinone oxidoreductase subunit H (EC 1.6.5.11) | <i>G. pickeringii</i>     | M1A/148<br>M4A/58  | 2.55              |
| <i>nuoL-1</i> Gmet_3344 | NADH dehydrogenase I, L subunit                     | <i>G. metallireducens</i> | M1A/73<br>M4A/32   | 2.28              |
| <i>nuoG-1</i> Q39QB3    | NADH dehydrogenase I, G subunit                     | <i>G. metallireducens</i> | M1A/229<br>M4A/105 | 2.18              |

|                         |                                                                          |                           |                    |      |
|-------------------------|--------------------------------------------------------------------------|---------------------------|--------------------|------|
| Q74GY2                  | ATP synthase subunit alpha (EC 3.6.3.14)                                 | <i>G. sulfurreducens</i>  | M1A/146<br>M4A/70  | 2.09 |
| <i>por</i> Gmet_3419    | Pyruvate-flavodoxin oxidoreductase (EC 1.2.7.-)                          | <i>G. metallireducens</i> | M1A/31<br>M4A/15   | 2.07 |
| <i>fgrM</i> Gmet_3263   | Flagellar biogenesis master sigma-54-dependent transcriptional regulator | <i>G. metallireducens</i> | M1A/117<br>M4A/59  | 1.98 |
| Q74GY0                  | ATP synthase subunit beta (EC 3.6.3.14)                                  | <i>G. sulfurreducens</i>  | M1A/162<br>M4A/82  | 1.96 |
| <i>pilB</i> _Q39XC1     | Type IV pilus biogenesis ATPase PilB                                     | <i>G. metallireducens</i> | M1A/355<br>M4A/182 | 1.95 |
| <i>carB-1</i> Gmet_1774 | Carbamoyl-phosphate synthase large chain (EC 6.3.5.5)                    | <i>G. metallireducens</i> | M1A/124<br>M4A/64  | 1.94 |
| <i>leuA</i> Gmet_1265   | 2-isopropylmalate synthase (EC 2.3.3.13)                                 | <i>G. metallireducens</i> | M1A/175<br>M4A/95  | 1.84 |
| Q746S4                  | NADH-quinone oxidoreductase subunit B/C/D (EC 1.6.5.11)                  | <i>G. sulfurreducens</i>  | M1A/299<br>M4A/168 | 1.78 |
| Q39QY3                  | Efflux pump, RND family, inner membrane protein                          | <i>G. metallireducens</i> | M1A/236<br>M4A/139 | 1.70 |
| Q39UG5                  | Aspartokinase (EC 2.7.2.4)                                               | <i>G. metallireducens</i> | M1A/322<br>M4A/190 | 1.69 |
| <i>ato-1</i> Gsu0490    | Succinyl:acetate coenzyme A transferase                                  | <i>G. sulfurreducens</i>  | M1A/150<br>M4A/100 | 1.50 |

168

169

b)

| Gene ID               | Protein                                  | Organism                 | Rank               | Rank change ratio |
|-----------------------|------------------------------------------|--------------------------|--------------------|-------------------|
| A0A0D5N7W1            | ATPase                                   | <i>G. sulfurreducens</i> | M1A/2<br>M4A/8     | -4.00             |
| A0A0B5B7H3            | Multiheme C-type cytochrome              | <i>G. pickeringii</i>    | M1A/29<br>M4A/69   | -2.38             |
| A0A0B5BIF0            | NADH-ubiquinone oxidoreductase subunit 3 | <i>G. pickeringii</i>    | M1A/113<br>M4A/243 | -2.15             |
| <i>fabA/Z</i> _A5GFJ6 | Beta-hydroxyacyl dehydratase, FabA/FabZ  | <i>G. uraniireducens</i> | M1A/108<br>M4A/232 | -2.15             |
| A0A0B5BC86            | Multicopper oxidase                      | <i>G. pickeringii</i>    | M1A/120<br>M4A/253 | -2.11             |

|                          |                                                                            |                           |                    |       |
|--------------------------|----------------------------------------------------------------------------|---------------------------|--------------------|-------|
| Q74C76                   | (R)-citramalate synthase (EC 2.3.1.182)                                    | <i>G. sulfurreducens</i>  | M1A/39<br>M4A/79   | -2.02 |
| A0A1T4RHG2               | Nif-specific regulatory protein                                            | <i>G. thiogenes</i>       | M1A/61<br>M4A/122  | -2.00 |
| Q74AK2                   | Sodium/solute symporter family protein                                     | <i>G. sulfurreducens</i>  | M1A/6<br>M4A/12    | -2.00 |
| A0A0B5BK17               | Diguanylate cyclase                                                        | <i>G. pickeringii</i>     | M1A/57<br>M4A/113  | -1.98 |
| Q39QD0                   | Periplasmically oriented, membrane-bound [NiFe]-hydrogenase, large subunit | <i>G. metallireducens</i> | M1A/102<br>M4A/199 | -1.95 |
| A0A0B5BAC1               | Dihydrolipoyl dehydrogenase (EC 1.8.1.4)                                   | <i>G. pickeringii</i>     | M1A/109<br>M4A/198 | -1.82 |
| A0A0B5BBC9               | Type I citrate synthase (EC 2.3.3.1)                                       | <i>G. pickeringii</i>     | M1A/149<br>M4A/269 | -1.81 |
| A0A0B5BJ81               | NADH-quinone oxidoreductase subunit D (EC 1.6.5.11)                        | <i>G. metallireducens</i> | M1A/25<br>M4A/44   | -1.76 |
| A0A0C1TL30               | Flagellar basal body stator protein MotB                                   | <i>G. soli</i>            | M1A/118<br>M4A/203 | -1.72 |
| <i>flgE/F_A0A0B5BIQ7</i> | Flagellar basal-body rod protein FlgF (Flagellar hook protein FlgE)        | <i>G. pickeringii</i>     | M1A/127<br>M4A/206 | -1.62 |
| A0A0D5NB12               | Aldehyde dehydrogenase                                                     | <i>G. sulfurreducens</i>  | M1A/171<br>M4A/260 | -1.52 |
| A0A0D5N6Q1               | FeS-binding protein                                                        | <i>G. sulfurreducens</i>  | M1A/166<br>M4A/251 | -1.51 |

170 **Table 2.** Rank increases of genes in a) M4A, b) M1A. Fold change ratio 1.5 was chosen as a threshold.

171

172 Genes from the *Geobacteraceae* (*G. pickeringii*, *G. uraniireducens*, *G. thiogenes*, and *G. soli*)

173 mostly increased in rank in M1A, with outer membrane multiheme cytochrome c (*omc*), NADH-

174 ubiquinone oxidoreductase (*nad3*),  $\beta$ -hydroxyacyl dehydratase (*fabA/Z*), multicopper oxidase

175 (*ompB*), Nif-regulatory protein (*nifA*) exhibiting more than a 2-fold increase in rank, as well as

176 dihydrolipoyl dehydrogenase (*lpdA*), type I citrate synthase (*gltA*), and flagellar components

177 (*motB*, *flgEF*), which exhibited 1.82, 1.81 and 1.7-fold shifts in rank, respectively (Table 2b). In  
178 M4A, a 2.55-fold rank increase was observed for the NADH quinone oxidoreductase gene  
179 (*nuoH*) from *G. pickeringii* (Table 2a).

180 In all planktonic samples, as well as in the initial community, top ranked genes are those  
181 involved in genome rearrangement (transposases, reverse transcriptases and endonucleases,  
182 see Tables S3-S7), which indicates selective pressure for adaptation to a more competitive  
183 environment. More detailed functional analysis of metagenomes collected in this study is  
184 described elsewhere (unpublished data).

### 185 **3 | DISCUSSION**

#### 186 **3.1 | Abundance of *Geobacter* spp. at anodes is directly proportional to the applied** 187 **voltage**

188 *Geobacter* is a well-characterized genus of EAB that populates BES anodes abundantly (Bond  
189 and Lovley, 2003). It can comprise  $\leq 99\%$  of bacterial communities isolated from BES electrodes  
190 operating at the lowest potential (Torres *et al.*, 2009). However, our work indicates that the  
191 abundance of *Geobacter* increases at anodes with increasing applied potential, meaning that as  
192 the electrode potential increases, *Geobacter* competes more effectively with other genera in  
193 the community. In contrast, *Shewanella* did not increase in abundance under these conditions  
194 likely due to the fact that *Shewanella* primarily utilizes lactate as a carbon source (e.g. Kim *et*  
195 *al.*, 1999; Pinchuk *et al.*, 2009).

196 Our abundance results contrast with those of Ishii *et al.* (2014), in which the highest abundance



197 of *Geobacter* spp. in acetate-fed, set-potential reactors was observed when anodes were held  
198 at -50 mV vs SHE. However, abundances from our study resemble those reported by Dennis *et*  
199 *al.* (2016). Also, the low initial population of *Geobacter* in the inoculum (see Table S2) may  
200 explain slower growth of *Geobacter* spp. at M4, compared to M1 and M2. Although periodic  
201 metagenomic sequencing reveals changes in the most abundant genera, it also indicates a large  
202 number of potentially undetected bacterial taxa. Changes in this community, as well as  
203 interactions among the most abundant EAB, will remain enigmatic, however, until genome  
204 assembly and isolation methods are improved to identify and characterize new strains.

### 205 **3.2 | Presence of *Geobacter* spp. at cathodes**

206 Apart from the *Geobacter* presence at anodes, *Geobacter* also dominated the M4 cathode  
207 community after 12 weeks, whereas it was scarcely present at other cathodes (0.06 and 0.07%  
208 in M1 and M2 cathodes, respectively) as well as at the M5 electrode (0.1%), being close to the  
209 inoculum abundance (0.08%). Such an increase in *Geobacter* spp. abundance in compartments  
210 with opposite conditions reflects its ability to both donate and accept electrons in association  
211 with electrodes (Holmes *et al.*, 2004; Gregory *et al.*, 2004). However, *Geobacter* was not found  
212 at cathodes in other studies (e.g. Daghighi *et al.*, 2015), which may reflect competition with  
213 different bacterial taxa, as well as differences in operating conditions, initial community  
214 structure, etc. Moreover, rank shifts of flagellar biosynthesis genes demonstrate ongoing  
215 colonization of new environmental niches by *Geobacter* spp. Recently, Rittmann and Asce  
216 (2017) concluded that the attribute to select the best-performing EAB is the lowest anode  
217 potential, but noted that such conditions are in fact stressful to the bacteria. Perhaps, the M4

218 cathode offered less deleterious conditions for *Geobacteriae* growth. The continuous decrease  
219 of methanogenic archaea at the M4 cathode may hint at competition for electrons with  
220 *Geobacter* spp., a known electrotroph (Strycharz *et al.*, 2011). It might be tempting to suggest  
221 that incidental oxygen formation, due to the potential difference between M4 electrodes  
222 exceeded the potential difference at which electrolysis of water can occur (1.33 V vs 1.23 V).  
223 However, we did not observe bubble formation; therefore, the latter hypothesis may be  
224 discarded. Moreover, there are no abundance shifts due to oxygen stress between the M1 and  
225 M4 cathodic metagenomes (Table S2), which would certainly follow electrolysis by BES. There is  
226 also no evidence of rank shifts in genes involved in hydrogenotrophic methanogenesis, e.g.,  
227 fumarate reductase, hydrogenase within. Microscopic observations (Fig. 1e-g) suggest some  
228 other relationship between *Geobacter* and methanogens in the cathodic community, e.g. via  
229 direct interspecies electron transfer (Lovley, 2017).

### 230 **3.3 | Functional analysis and evidence of differential selection pressure on *Geobacter*** 231 **at low electrode potentials.**

232 We were intrigued by the dependence of observed genomic shifts in *Geobacter* metabolic  
233 functions on reactor conditions. The changes themselves, relevant to main pathways of  
234 electrogenic organisms in MFC, suggest that bacterial genomes evolve rapidly due to metabolic  
235 competition. Acetate metabolism is central to metabolism of *G. sulfurreducens* under  
236 electrogenic conditions (Bond and Lovley, 2003; Ieropoulos *et al.*, 2010). This metabolic feature  
237 allows these bacteria to dominate anodic communities if acetate is provided or generated by  
238 other members of the syntrophic bacterial community (e.g. *G. metallireducens*). Interestingly,

239 *G. sulfurreducens* functions required for acetate utilization (*ato*) were the only ones from this  
240 species that strongly changed rank at lower anodic potential (M4) (Table 2a), with aldehyde  
241 dehydrogenase rank decreasing (Table 2b). Acetate utilization by *G. sulfurreducens* may be  
242 supported by a syntrophic association with *Pelobacter* spp. (Sreshtha *et al.*, 2013), and  
243 enrichment of this genus was observed on anodes M1 and M2 (Fig. 2a-b). Though acetate was  
244 provided in the medium, local interactions between bacteria and bacterial clusters may be  
245 significant. Sequences corresponding to ATP synthase subunits also increased in abundance in  
246 M4A, with a 4-fold decrease in ATPase (Table 2), suggesting higher pressure for energy  
247 generation.

248 At the same time, adaptation and evolution of highly electrogenic *G. metallireducens* at M4  
249 seems to proceed due to a requirement for conductive pili, respiratory NADH dehydrogenases,  
250 and pyruvate metabolism, which increase in rank at M4A (Table 2a). NuoL, for which  
251 metagenomic rank changed most at the M4 anode compared to M1A, is responsible for the  
252 reverse electron transfer and  $H^+/e^-$  stoichiometry (Steimle *et al.*, 2011), which may be  
253 important for balancing electron flow between  $NAD^+$  and ferredoxin pools. PilB is an ATPase  
254 required for polymerization of conductive e-pili (McCallum *et al.*, 2017), and *pilB* mutants are  
255 reported to generate lower current and form thinner biofilms (Steidl *et al.*, 2016). Additionally,  
256 it was observed by Ishii *et al.* (2018) that *pilA* expression increased at lower surface potential.  
257 Change in *pilB* expression has not been reported there, although it could be a result of a  
258 normalization procedure: with an increase in a number of DNA reads, change in number of RNA  
259 reads/expression could not be observed.

260 Flagellar response regulator (*fgrM*), which increased in rank in M4A, regulates flagellar growth,

261 a feature known in *G. metallireducens* when grown with an insoluble Fe(III) source (Ueki *et al.*,  
262 2012). This feature corresponds to increased motility of cells when Fe(III) sources are scattered.  
263 Cells can store electrons in their numerous cytochromes, acting as capacitors, so that they can  
264 discharge them upon the next available Fe(III) cluster. Similarly, lower surface potential of  
265 anode in M4A could lead to formation of dispersed local spots for electron release. Thus, *G.*  
266 *metallireducens* cells with regulated expression of flagella proteins could possess higher and  
267 more ordered motility, which, together with the higher capacity to polymerize e-pili by PilB,  
268 should give them advantage over competitors.

269 The study shows a decrease in rank of genes belonging to other taxa (*G. pickeringii*, *G.*  
270 *uraniireducens*, *G. thiogenes* and *G. soli*) at lower surface potential (Table 2b). Citrate synthase  
271 (*G. pickeringii*), a proposed indicator of Geobacteraceae metabolic activity (Holmes *et al.*, 2005)  
272 decreased almost 2-fold at M4A. Also, genes encoding components of EET are lower in rank at  
273 M4A (Table 2b). This correlates with the limited capacity of these Geobacteraceae to adapt to  
274 low surface potential, as their electrochemical activity was reported for rather more positive  
275 redox potentials (Ishii *et al.*, 2018).

276 Certainly, gene abundance cannot be taken as an unequivocal reflection of activity levels of  
277 relevant functions in bacterial metabolism under different conditions. However, we suggest  
278 that genomic rearrangements represent responses to specific functional requirements. Genes  
279 may be retained or even propagate in a population if they enhance organismal fitness.

280 Increasing abundances of bacterial strains bearing advantageous genes may also explain the  
281 observed phenomenon. As shown in the case of *pilB* gene, analysis of gene ranks derived from

282 metagenomics analysis can complement expression studies.

### 283 **3.4 | The importance of unknown organisms in a functional overview of these** 284 **metagenomes**

285 The presence of unclassified taxa indicates an increase in abundance of unknown organisms  
286 upon inoculation into BES reactors. Our results (Fig. 4) do not align with previous work (Ishii *et*  
287 *al.*, 2014), in which unclassified taxa in the inoculum contained comparable numbers of  
288 unclassified reads, but only several percent of unclassified organisms were sampled from the  
289 electrodes. The discrepancy between the two studies may be due to the difference in sampling  
290 and sequencing methods. The former study employed only 16S samples, whereas we compared  
291 Illumina MiSeq whole metagenomic reads. Such discrepancies were also reported in a later  
292 study by Ishii *et al.* (2018), where lower diversity was reported in the same samples when only  
293 16S analysis was employed. The abundance of novel unidentified organisms suggests the  
294 existence of novel electrogenic microorganisms. Such organisms may not be as efficient in EET  
295 as *Geobacter spp.*; hence the term “weak electricigens” (Doyle and Marsili, 2018), but they may  
296 nonetheless provide useful insight into the divergence of EET mechanisms. However, since their  
297 increases do not follow electrode potential, the presence of so many unclassified organisms,  
298 may be more related to the inoculum than to reactor conditions.

## 299 **4 | EXPERIMENTAL PROCEDURES**

### 300 **4.1 | Reactor setup and operating conditions**

301 Four reactors (M1-4) were designed as follows: 1.2L chamber with an anode consisting of 6 carbon-fiber

302 strips (Zoltec) 3x10 cm connected with titanium wire (Kojundo chemical laboratory), a cathode  
303 consisting of 6 carbon-fiber strips (Zoltec) 3x10 cm connected with titanium wire, and a reference  
304 electrode (Radiometer Analytical, Hach). Additionally, one control reactor (M5) consisted only of one set  
305 of 6 carbon-fiber strips (Zoltec) 3x10 cm connected with titanium wire and reference electrode  
306 (Radiometer Analytical, Hach), and was operated in open circuit mode (see Fig.S1 for schematic view). A  
307 four-channel potentiostat (UniChem) was connected to each reactor with stainless steel clips and  
308 potential differences of 147 mV, 47 mV, -53 mV and -153 mV (vs SHE) were applied to anodes M 1-4A,  
309 respectively. Each reactor was inoculated with rice wash water (1.2L) and incubated for 2 weeks at room  
310 temperature (23°C), after which the liquid was replaced with an equal volume of the following medium:  
311 0.05 M phosphate buffer (pH 6), 200 mg/L CaCl<sub>2</sub>•2H<sub>2</sub>O, 250 mg/L MgCl<sub>2</sub>•6H<sub>2</sub>O, 500 mg/L NH<sub>4</sub>Cl, sodium  
312 acetate 2g COD/L (Fedorovich *et al.*, 2009). COD concentration was measured using a Hach COD kit  
313 (Hach, USA). The medium was replaced 6 times at 2-week intervals, yielding a total operating time of 12  
314 weeks. Additionally, 50 mL of liquid fraction and one strip of each electrode (1x A and 1x C from M1-4  
315 and 1x A from M5) were collected with every change of medium. These were used for DNA extraction  
316 and SEM analysis.

## 317 **4.2 | Microscopic imaging**

318 Samples for microscopic imaging were taken simultaneously with the DNA samples and processed with  
319 osmium, as follows (Fischer *et al.*, 2012): upon removal from the anode compartment, the samples were  
320 immediately cut by knife, and fixed by 1% Osmium diluted with 0.2M Cacodylate (Wako) buffer 30min.  
321 The samples were then washed three times with RQ water and dehydrated stepwise with a graded  
322 series of ethanol solutions (70, 80, 90, 95 and three times 100%). The electrode samples were finally  
323 critical-point dried with tert-butyl ethanol and sputter coated with a thin layer of gold. The samples  
324 were analyzed by a scanning electron microscopy (SEM) (JSM-7900F JEOL).

### 325 **4.3 | DNA extraction and library preparation**

326 DNA was extracted using TRIzol (Life Technologies) and additional samples were subjected to Maxwell  
327 extraction (GMO purefood kit, Maxwell) using an automated RSC system (Promega). Samples with  
328 sufficient amounts of DNA were subjected to Illumina sequencing (48). Remaining samples (32) were  
329 subjected to 16S sequencing. DNA libraries were constructed using Nextera XT kit (Illumina) and  
330 sequencing was performed on MiSeq platform (Illumina, San-Diego, CA, USA). Samples were uploaded  
331 to MG-RAST (mgp81854 for 16S, mgp82844 for metagenomes). We were unable to collect data from 3  
332 cathodal samples (see Table S1).

### 333 **4.4 | Bioinformatic analysis**

334 Whole-genome sequences and 16S sequences were analyzed using a custom-developed pipeline, as  
335 described elsewhere (Orakov *et al.*, 2017), which carried out taxonomic analysis using Kaiju (Menzel and  
336 Krogh, 2016), as well as functional analysis using PALADIN (only applicable to metagenomes)  
337 (Westbrook *et al.*, 2017). Results of PALADIN analysis for anodes M1 and M4 can be found in the  
338 Supplementary material (Table S3). Compositional analysis of communities was performed in R version  
339 1.4.0 (van den Boogaart *et al.*, 2018) with package compositions (van den Boogaart and Tolosana-  
340 Delgado, 2008). Relative abundance was represented as composition with absolute geometry (rcomp).  
341 To combine 16S and metagenomic sequences, datasets from Kaiju and MG-RAST were manually curated  
342 (a more detailed description can be found at <https://github.com/lptolik/ASAR>). One-way ANOVA was  
343 conducted to determine the significance of differences in abundance of *Geobacter* between M1A, M2A  
344 and M4A for the period between week 8 and 12. For visualization purposes, the five most abundant  
345 genera in the inoculum and five most abundant genera in Week 12 were selected. All other genera were  
346 included in the “Other” group. The R script employed is described in Orakov *et al.* (2017).

347

348 **ACKNOWLEDGEMENTS**

349 This research was supported by Okinawa Institute of Science and Technology Graduate University. We  
350 thank Dr. Larisa Kiseleva for collecting electrode and plankton samples and Dr. Toshio Sasaki for  
351 preparing SEM specimens.

352 **CONFLICT OF INTEREST**

353 The authors declare no conflict of interest.

354



## 355 REFERENCES

- 356 Aelterman, P., Freguia, S., Keller, J., Verstraete, W. and Rabaey, K. (2008) The anode potential regulates bacterial activity in  
357 microbial fuel cells. *Applied microbiology and biotechnology*, **78**, 409–418.
- 358 Allen, R. M. and Bennetto, H. P. (1993) Microbial fuel cells: Electricity production from carbohydrates. *Applied Biochemistry and*  
359 *Biotechnology*, **39**, 27–40.
- 360 Beecroft, N. J., Zhao, F., Varcoe, J. R., Slade, R. C. T., Thumser, A. E. and Avignone-rossa, C. (2012) Dynamic changes in the  
361 microbial community composition in microbial fuel cells fed with sucrose. *Applied Microbiology and Biotechnology*, **93** 423–437.
- 362 Bond, D. R., Holmes, D. E., Tender, L. M. and Lovley, D. R. (2002) Electrode-Reducing Microorganisms That Harvest Energy from  
363 Marine Sediments. *Science*, **295**, 483–485.
- 364 Bond, D. R. and Lovley, D. R. (2003) Electricity Production by *Geobacter sulfurreducens* Attached to Electrodes Electricity  
365 Production by *Geobacter sulfurreducens* Attached to Electrodes. *Applied and Environmental Microbiology*, **69**, 1548–1555.
- 366 van den Boogaart, K., Tolosana, R. and Bren, M. (2018) Compositions: Compositional data analysis. r-package version 1.40–1.
- 367 van den Boogaart, K. G. and Tolosana-Delgado, R. (2008) “compositions”: A unified R package to analyze compositional data.  
368 *Computers & Geosciences*, **34**, 320–338.
- 369 Brooks, J. P., Edwards, D. J., Harwich, M. D., Rivera, M. C., Fettweis, J. M., Serrano, M. G., Reris, R. A., Sheth, N. U., Huang, B.,  
370 Girerd, P., Strauss, J. F., Jefferson, K. K. and Buck, G. A. (2015) The truth about metagenomics: Quantifying and counteracting  
371 bias in 16S rRNA studies Ecological and evolutionary microbiology. *BMC Microbiology*, **15**, 1–14.
- 372 Cord-Ruwisch, R., Lovley, D. R., Schink, B. (1998). Growth of *Geobacter sulfurreducens* with acetate in syntrophic cooperation  
373 with hydrogen-oxidizing anaerobic partners. *Applied and Environmental Microbiology*, **64**(6), 2232–2236.
- 374 Daghighi, M., Gandolfi, I., Bestetti, G., Franzetti, A., Guerrini, E. and Cristiani, P. (2015) Anodic and cathodic microbial communi-  
375 ties in single chamber microbial fuel cells. *New Biotechnology*, **32**, 79–84.
- 376 Dennis, P. G., Viridis, B., Vanwonterghem, I., Hassan, A., Hugenholtz, P., Tyson, G. W. and Rabaey, K. (2016) Anode potential  
377 influences the structure and function of anodic electrode and electrolyte-associated microbiomes. *Scientific Reports*, **6**, 1–11.
- 378 Doyle, L. E., & Marsili, E. (2018). Weak electricigens: A new avenue for bioelectrochemical research. *Bioresource Technology*,  
379 258, 354–364.
- 380 Dupuis, A., Peinnequin, A., Darrouzet, E., Lunardi, J. (1997). Genetic disruption of the respiratory NADH-ubiquinone reductase of  
381 *Rhodobacter capsulatus* leads to an unexpected photosynthesis-negative phenotype. *FEMS Microbiology Letters*, **148**(1), 107–  
382 114.
- 383 Fedorovich, V., Knighton, M. C., Pagaling, E., Ward, F. B., Free, A. and Goryanin, I. (2009) Novel electrochemically active bac-

- 384 terium phylogenetically related to *Arcobacter butzleri*, isolated from a microbial fuel cell. *Applied and Environmental*  
385 *Microbiology*, **75**, 7326–7334.
- 386 Fischer, E. R., Hansen, B. T., Nair, V., Hoyt, F. H. and Dorward, D. W. (2012) Scanning Electron Microscopy. *Current Protocols in*  
387 *Microbiology*, 1–16.
- 388 Gregory, K. B., Bond, D. R. and Lovley, D. R. (2004) Graphite electrodes as electron donors for anaerobic respiration.  
389 *Environmental Microbiology*, **6**, 596–604.
- 390 Holmes, D. E., Bond, D. R., O’Neil, R. A., Reimers, C. E., Tender, L. R. and Lovley, D. R. (2004) Microbial communities associated  
391 with electrodes harvesting electricity from a variety of aquatic sediments. *Microbial Ecology*, **48**, 178–190.
- 392 Ieropoulos, I., Winfield, J. and Greenman, J. (2010) Effects of flow-rate, inoculum and time on the internal resistance of  
393 microbial fuel cells. *Bioresource Technology*, **101**, 3520–3525.
- 394 Ishii, S., Suzuki, S., Norden-Krichmar, T. M., Tenney, A., Chain, P. S. G., Scholz, M. B., Nealsen, K. H. and Bretschger, O. (2013) A  
395 novel metatranscriptomic approach to identify gene expression dynamics during extracellular electron transfer. *Nature*  
396 *Communications*, **4:1601**, 1–10.
- 397 Ishii, S., Suzuki, S., Norden-Krichmar, T. M., Phan, T., Wanger, G., Nealsen, K. H., ... Bretschger, O. (2014). Microbial population  
398 and functional dynamics associated with surface potential and carbon metabolism. *ISME Journal*, **8**(5), 963–978.
- 399 Ishii, S., Suzuki, S., Tenney, A., Nealsen, K. H., & Bretschger, O. (2018). Comparative metatranscriptomics reveals extracellular  
400 electron transfer pathways conferring microbial adaptivity to surface redox potential changes. *ISME Journal*, **12**(12), 2844–  
401 2863.
- 402 Kim, H. J., Hyun, M. S., Chang, I. S., & Kim, B. H. (1999). A microbial fuel cell type lactate biosensor using a metal-reducing  
403 bacterium, *Shewanella putrefaciens*. *Journal of Microbiology and Biotechnology*, **9**(3), 365-367.
- 404 Pinchuk, G. E., Rodionov, D. A., Yang, C., Li, X., Osterman, A. L., Dervyn, E., ... Beliaev, A. S. (2009). Genomic reconstruction of  
405 *Shewanella oneidensis* MR-1 metabolism reveals a previously uncharacterized machinery for lactate utilization. *Proceedings of*  
406 *the National Academy of Sciences*, **106**(8), 2874–2879.
- 407 Khater, D. Z., El-khatib, K. M. and Hassan, H. M. (2017) Microbial diversity structure in acetate single chamber microbial fuel cell  
408 for electricity generation. *Journal of Genetic Engineering and Biotechnology*, **15**, 127–137.
- 409 Logan, B. E., Hamelers, B., Rozendal, R., Schroder, U., Keller, J., Freguia, S., Aelterman, P., Verstraete, W. and Rabaey, K. (2006)  
410 Microbial Fuel Cells : Methodology and Technology. *Environmental Science and Technology*, **40** (17), 5181–5192.
- 411 Lovley, D. R. (2017). Syntrophy Goes Electric: Direct Interspecies Electron Transfer. *Annual Review of Microbiology*, **71**(1), 643-  
412 664.
- 413 McCallum, M., Tammam, S., Khan, A., Burrows, L. L., & Lynne Howell, P. (2017). The molecular mechanism of the type IVa pilus

- 414 motors. *Nature Communications*, 8(May), 1–10.
- 415 Menzel, P. and Krogh, A. (2016) Kaiju: Fast and sensitive taxonomic classification for metagenomics. *Nature communications*, 7,  
416 1–9.
- 417 Orakov, A., Sakenova, N., Sorokin, A. and Goryanin, I. (2017) ASAR: visual analysis of metagenomes in R. *Bioinformatics*, 0–0.
- 418 Orellana, Roberto (2014). "PHYSIOLOGICAL MODELS OF GEOBACTER SULFURREDUCTENS AND DESULFOBACTER POSTGATEI TO  
419 UNDERSTAND URANIUM REMEDIATION IN SUBSURFACE SYSTEMS" (2014). *Doctoral Dissertations*.
- 420 Paitier, A., Godain, A., Lyon, D., Haddour, N., Vogel, T. M. and Monier, J.-M. (2017) Biosensors and Bioelectronics Microbial fuel  
421 cell anodic microbial population dynamics during MFC start-up. *Biosensors and Bioelectronics*, 92,357–363.
- 422 Philips, J., Verbeeck, K., Rabaey, K. and Arends, J. (2015) Electron transfer mechanism in biofilms. In *Microbial Electrochemical  
423 and Fuel Cells Fundamentals and Applications* (eds. K. Scott and E. H. Yu), chap. 3, 113–169. Cambridge: Woodhead Publishing  
424 (Elsevier), first edn.
- 425 Poretsky, R., Rodriguez-r, L. M., Luo, C., Tsementzi, D. and Konstantinidis, K. T. (2014) Strengths and Limitations of 16S rRNA  
426 Gene Amplicon Sequencing in Revealing Temporal Microbial Community Dynamics. *PLOS One*, 9(4), e93827.
- 427 Rosselli, R., Romoli, O., Vitulo, N., Vezzi, A., Campanaro, S., De Pascale, F., ... Squartini, A. (2016). Direct 16S rRNA-seq from  
428 bacterial communities: A PCR-independent approach to simultaneously assess microbial diversity and functional activity  
429 potential of each taxon. *Scientific Reports*, 6(February), 1–12.
- 430 Rittmann, B. E. and Asce, D. M. (2017) Ironies in Microbial Electrochemistry. *Journal of Environmental Engineering*, 143, 1–7.
- 431 Santoro, C., Arbizzani, C., Erable, B., Ieropoulos, I. (2017). Microbial fuel cells: From fundamentals to applications. A review.  
432 *Journal of Power Sources*, 356, 225–244.
- 433 Schroder, U. (2007) Anodic electron transfer mechanisms in microbial fuel cells and their energy efficiency. *Physical Chemistry  
434 Chemical Physics*, 9, 2619–2629.
- 435 Shrestha, P. M., Rotaru, A. E., Summers, Z. M., Shrestha, M., Liu, F., Lovley, D. R. (2013). Transcriptomic and genetic analysis of  
436 direct interspecies electron transfer. *Applied and Environmental Microbiology*, 79(7), 2397–2404.
- 437 Shrestha, P. M. and Rotaru, A. E. (2014) Plugging in or going wireless: Strategies for interspecies electron transfer. *Frontiers in  
438 Microbiology*, 5, 1–8.
- 439 Steidl, R. J., Lampa-Pastirk, S., & Reguera, G. (2016). Mechanistic stratification in electroactive biofilms of *Geobacter*  
440 *sulfurreducens* mediated by pilus nanowires. *Nature Communications*, 7.
- 441 Steimle, S., Bajzath, C., Dorner, K., Schulte, M., Bothe, V., Friedrich, T. (2011). Role of subunit NuoL for proton translocation by  
442 respiratory complex I. *Biochemistry*, 50(16), 3386–3393.
- 443 Torres, C. I., Krajmalnik-Brown, R., Parameswaran, P., Marcus, A. K., Wanger, G., Gorby, Y. A. and Rittmann, B. E. (2009)

- 444 Selecting Anode-Respiring Bacteria Based on Anode Potential: Phylogenetic, Electrochemical, and Microscopic Characterization.  
445 *Environ. Sci. Technol.*, **43**, 9519–9524.
- 446 Westbrook, A., Ramsdell, J., Schuelke, T., Normington, L., Bergeron, R. D., Thomas, W. K. and MacManes, M. D. (2017) PALADIN:  
447 Protein alignment for functional profiling whole metagenome shotgun data. *Bioinformatics*, **33**, 1473–1478.
- 448 Yates, M. D., Kiely, P. D., Call, D. F., Rismani-Yazdi, H., Bibby, K., Peccia, J., Regan, J. M. and Logan, B. E. (2012) Convergent  
449 development of anodic bacterial communities in microbial fuel cells. *ISME Journal*, **6**, 2002–2013.
