# Supplementary material for: Evolutionary dynamics of microbial communities in bioelectrochemical systems
Source: bioRxiv or medRxiv preprint supplement (doi:10.1101/725580), 2019-11-07
Supplement: Supplementary file [file media-1.pdf]

## Evolutionary dynamics of microbial communities in bioelectrochemical systems.

Lukasz Szydlowski<sup>1\*</sup> | Anatoly Sorokin<sup>23</sup> | Olga Vassieva<sup>4</sup> | Susan Boerner<sup>1</sup> | Veyacheslav Fedorovich<sup>1</sup> | Igor Goryanin<sup>156</sup>

### Supplementary material

**Figure S1.** Schematic diagram of M1-M4 **a)** side view, **b)** front view and **c)** M5 reactors.

**Figure S2.** Relative abundances of top genera collected from M3 **a)** working electrode **b)** counter electrode and **c)** plankton throughout the time of experiment. Colors represent according taxonomy groups, + - other organisms.

---

<sup>1</sup> Okinawa Institute of Science and Technology, Japan

\* Correspondence: Okinawa Institute of Science and Technology, Japan Email: lukasz.szydlowski@oist.jp ; Phone: +81-(0)98-982-3420

<sup>2</sup> Institute of Cell Biophysics, Russia

<sup>3</sup> Institute of Physics and Technology, Russia

<sup>4</sup> University of Liverpool, United Kingdom

<sup>5</sup> The School of Informatics, University of Edinburgh, United Kingdom

<sup>6</sup> Tianjin Institute for Industrial Biotechnology, China

**Table S1.** Sequencing data for all samples.

**Table S2.** Taxonomy analysis of initial community.

**Table S3.** Functional overview of initial community (top 500 rank only).

**Table S4.** Functional overview of **a)** M1A **b)** M1C **c)** M1P communities (top 500 rank only) after 12-week reactor operation.

**Table S5.** Functional overview of **a)** M2A **b)** M2C **c)** M2P communities (top 500 rank only) after 12-week reactor operation.

**Table S6.** Functional overview of **a)** M4A **b)** M4C **c)** M4P communities (top 500 rank only) after 12-week reactor operation.

**Table S7.** Functional overview of M5A communities (top 500 rank only) after 12-week reactor operation.

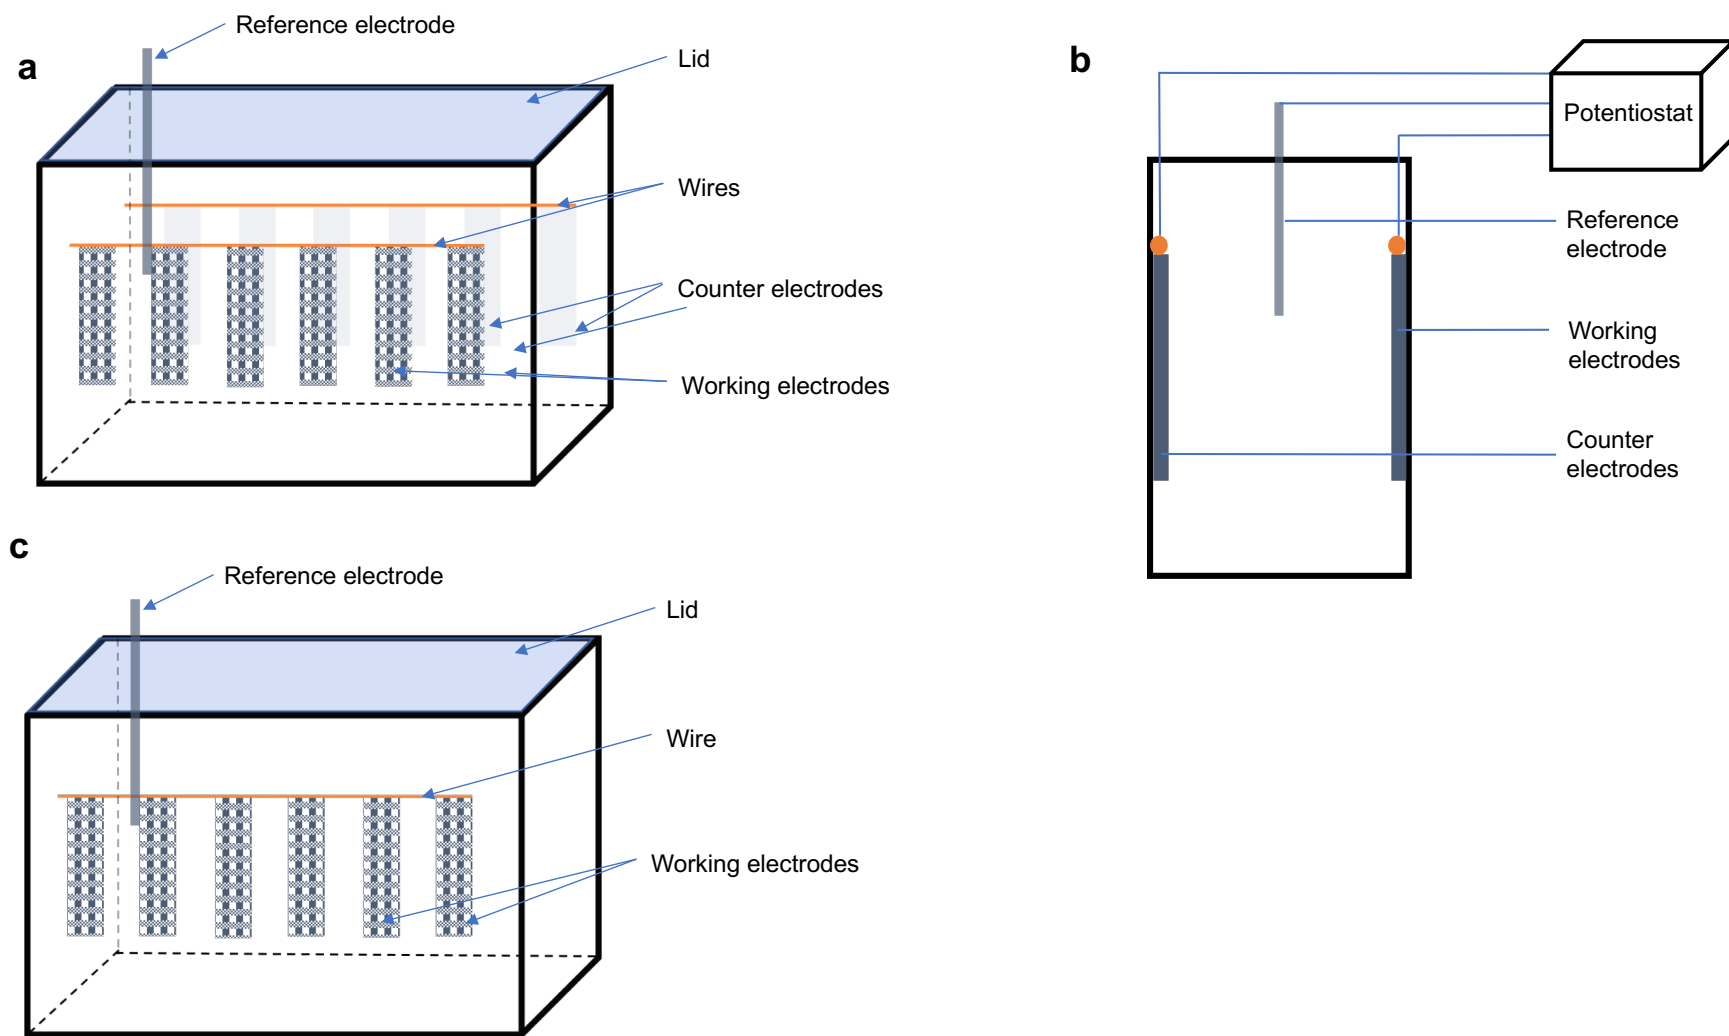

**Fig. S1.** Schematic diagram of M1-M4 **a)** side view, **b)** front view and **c)** M5 reactors.

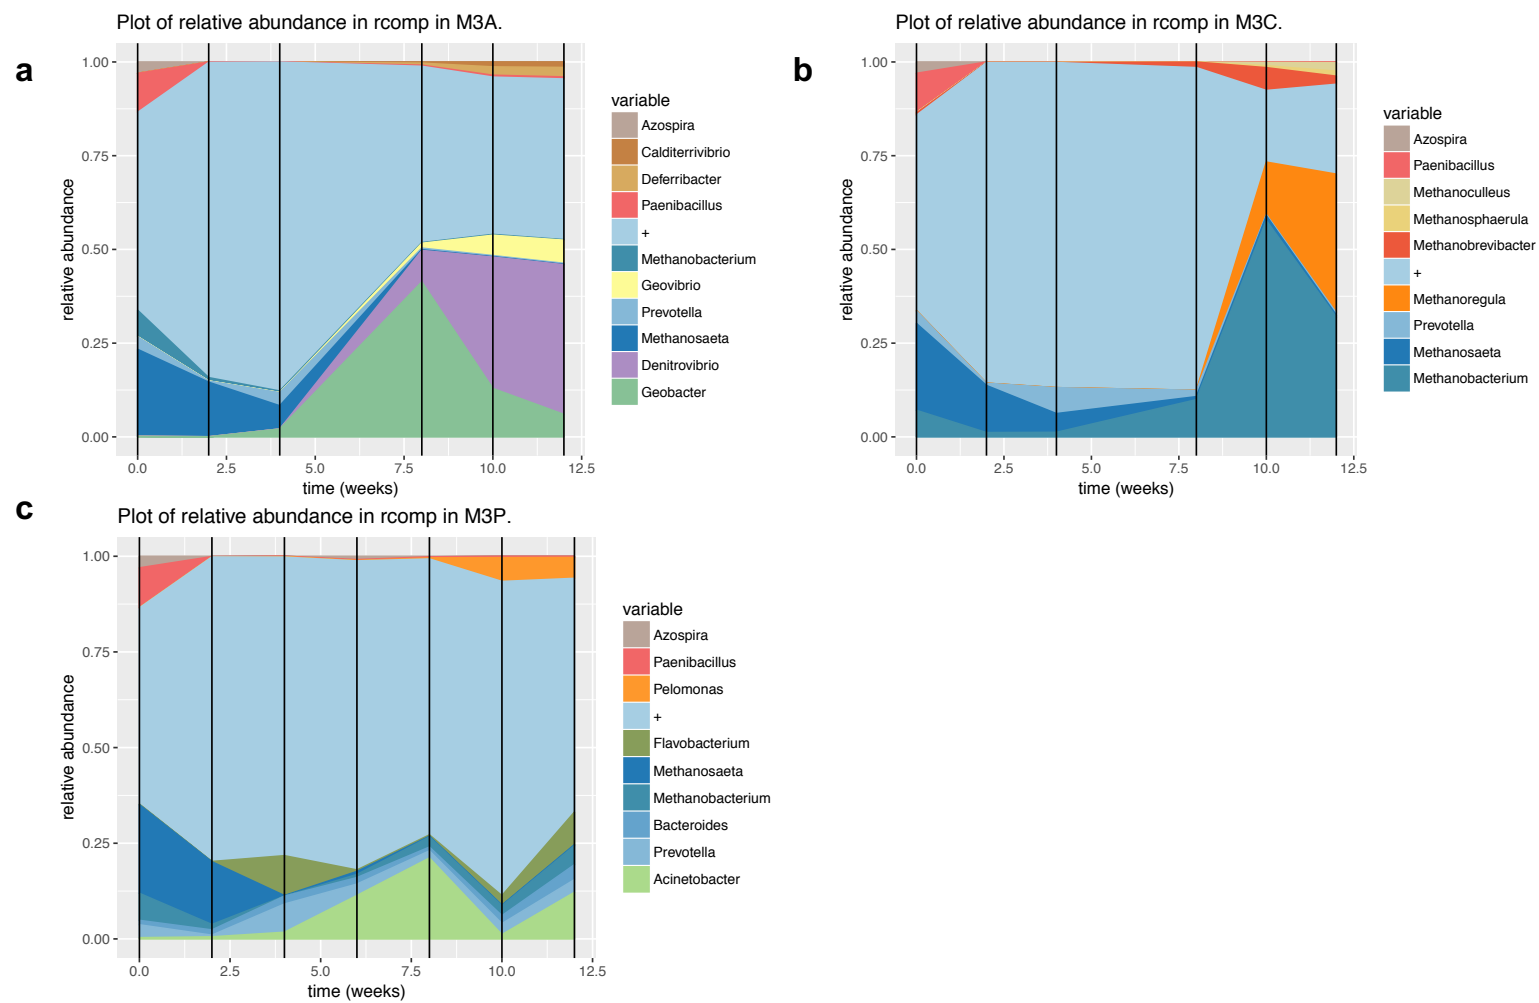

**Fig. S2.** Relative abundances of top genera collected from M3 a) working electrode b) counter electrode and c) plankton throughout the time of experiment. Colors represent according taxonomy groups, + - other organisms.

**Table S1.** Sample sequencing sheet. ND – no data.

| <b>Sample</b>    | <b>Sequencing type</b> | <b>Sample</b> | <b>Sequencing type</b> | <b>Sample</b> | <b>Sequencing type</b> |
|------------------|------------------------|---------------|------------------------|---------------|------------------------|
| Initial inoculum | Illumina               | 6 weeks M1A   | Illumina               | 10 weeks M1A  | Illumina               |
| 2 weeks M1A      | 16S                    | 6 weeks M1C   | Illumina               | 10 weeks M1C  | Illumina               |
| 2 weeks M1C      | 16S                    | 6 weeks M1P   | Illumina               | 10 weeks M1P  | Illumina               |
| 2 weeks M1P      | 16S                    | 6 weeks M2A   | Illumina               | 10 weeks M2A  | 16S                    |
| 2 weeks M2A      | 16S                    | 6 weeks M2C   | 16S                    | 10 weeks M2C  | Illumina               |
| 2 weeks M2C      | 16S                    | 6 weeks M2P   | Illumina               | 10 weeks M2P  | Illumina               |
| 2 weeks M2P      | 16S                    | 6 weeks M3A   | Illumina               | 10 weeks M3A  | Illumina               |
| 2 weeks M3A      | 16S                    | 6 weeks M3C   | ND                     | 10 weeks M3C  | Illumina               |
| 2 weeks M3C      | 16S                    | 6 weeks M3P   | Illumina               | 10 weeks M3P  | Illumina               |
| 2 weeks M3P      | 16S                    | 6 weeks M4A   | Illumina               | 10 weeks M4A  | Illumina               |
| 2 weeks M4A      | 16S                    | 6 weeks M4C   | ND                     | 10 weeks M4C  | Illumina               |
| 2 weeks M4C      | 16S                    | 6 weeks M4P   | Illumina               | 10 weeks M4P  | Illumina               |
| 2 weeks M4P      | 16S                    | 6 weeks M5A   | Illumina               | 10 weeks M5A  | Illumina               |
| 2 weeks M5A      | 16S                    | 6 weeks M5P   | Illumina               | 10 weeks M5P  | Illumina               |
| 2 weeks M5P      | 16S                    | 8 weeks M1A   | Illumina               | 12 weeks M1A  | Illumina               |
| 4 weeks M1A      | 16S                    | 8 weeks M1C   | Illumina               | 12 weeks M1C  | Illumina               |
| 4 weeks M1C      | 16S                    | 8 weeks M1P   | Illumina               | 12 weeks M1P  | Illumina               |
| 4 weeks M1P      | 16S                    | 8 weeks M2A   | Illumina               | 12 weeks M2A  | Illumina               |
| 4 weeks M2A      | 16S                    | 8 weeks M2C   | 16S                    | 12 weeks M2C  | Illumina               |
| 4 weeks M2C      | 16S                    | 8 weeks M2P   | Illumina               | 12 weeks M2P  | Illumina               |
| 4 weeks M2P      | 16S                    | 8 weeks M3A   | Illumina               | 12 weeks M3A  | Illumina               |

|             |     |             |          |              |          |
|-------------|-----|-------------|----------|--------------|----------|
| 4 weeks M3A | 16S | 8 weeks M3C | 16S      | 12 weeks M3C | Illumina |
| 4 weeks M3C | 16S | 8 weeks M3P | Illumina | 12 weeks M3P | Illumina |
| 4 weeks M3P | 16S | 8 weeks M4A | Illumina | 12 weeks M4A | Illumina |
| 4 weeks M4A | 16S | 8 weeks M4C | ND       | 12 weeks M4C | Illumina |
| 4 weeks M4C | 16S | 8 weeks M4P | Illumina | 12 weeks M4P | Illumina |
| 4 weeks M4P | 16S | 8 weeks M5A | 16S      | 12 weeks M5A | Illumina |
| 4 weeks M5A | 16S | 8 weeks M5P | Illumina | 12 weeks M5P | Illumina |
| 4 weeks M5P | 16S |             |          |              |          |

**Table S2.** Taxonomy analysis of initial community. Genera with less than 100 reads were not considered.

| %     | reads  | Genus                            | %    | reads | Genus                           | %    | reads | Genus                       |
|-------|--------|----------------------------------|------|-------|---------------------------------|------|-------|-----------------------------|
| 12.59 | 922582 | <i>Methanosaeta</i>              | 0.01 | 518   | <i>Acidiphilium</i>             | 0.00 | 211   | <i>Rothia</i>               |
| 5.67  | 415612 | <i>Paenibacillus</i>             | 0.01 | 517   | <i>Haliangium</i>               | 0.00 | 211   | <i>Kingella</i>             |
| 3.84  | 281366 | <i>Methanobacterium</i>          | 0.01 | 516   | <i>Nakamurella</i>              | 0.00 | 210   | <i>Methanogenium</i>        |
| 1.83  | 133887 | <i>Prevotella</i>                | 0.01 | 513   | <i>Castellaniella</i>           | 0.00 | 210   | <i>Chrysiogenes</i>         |
| 1.65  | 121192 | <i>Azospira</i>                  | 0.01 | 511   | <i>Chthonomonas</i>             | 0.00 | 210   | <i>Algibacter</i>           |
| 0.87  | 63773  | <i>Desulfovibrio</i>             | 0.01 | 510   | <i>Caldanaerobius</i>           | 0.00 | 209   | <i>Thiorhodospira</i>       |
| 0.73  | 53428  | <i>Mesotoga</i>                  | 0.01 | 509   | <i>Ectocarpus</i>               | 0.00 | 208   | <i>Amphibacillus</i>        |
| 0.70  | 51642  | <i>Megasphaera</i>               | 0.01 | 509   | <i>Proteiniclasticum</i>        | 0.00 | 208   | <i>Balneola</i>             |
| 0.68  | 49705  | <i>Streptomyces</i>              | 0.01 | 508   | <i>Absidia</i>                  | 0.00 | 208   | <i>Cesiribacter</i>         |
| 0.66  | 48416  | <i>Candidatus Accumulibacter</i> | 0.01 | 508   | <i>Thiohalocapsa</i>            | 0.00 | 207   | <i>Cyclospora</i>           |
| 0.63  | 46281  | <i>Bacteroides</i>               | 0.01 | 507   | <i>Pseudobutyrvibrio</i>        | 0.00 | 207   | <i>Neonectria</i>           |
| 0.60  | 44138  | <i>Clostridium</i>               | 0.01 | 507   | <i>Alkaliflexus</i>             | 0.00 | 207   | <i>Bhargavaea</i>           |
| 0.58  | 42636  | <i>Lentimicrobium</i>            | 0.01 | 507   | <i>Alkalitalea</i>              | 0.00 | 207   | <i>Jatrophihabitans</i>     |
| 0.43  | 31511  | <i>Pseudomonas</i>               | 0.01 | 505   | <i>Pseudovibrio</i>             | 0.00 | 206   | <i>Paxillus</i>             |
| 0.39  | 28532  | <i>Azovibrio</i>                 | 0.01 | 502   | <i>Cladophialophora</i>         | 0.00 | 206   | <i>Olivibacter</i>          |
| 0.34  | 24617  | <i>Mycobacterium</i>             | 0.01 | 500   | <i>Salegentibacter</i>          | 0.00 | 206   | <i>Clostridiisalibacter</i> |
| 0.33  | 23953  | <i>Methanobrevibacter</i>        | 0.01 | 499   | <i>Dickeya</i>                  | 0.00 | 206   | <i>Paramaledivibacter</i>   |
| 0.32  | 23207  | <i>Methanosarcina</i>            | 0.01 | 498   | <i>Oscillatoria</i>             | 0.00 | 205   | <i>Thiocystis</i>           |
| 0.27  | 19922  | <i>Oscillibacter</i>             | 0.01 | 495   | <i>Thermophagus</i>             | 0.00 | 205   | <i>Citromicrobium</i>       |
| 0.27  | 19921  | <i>Dechloromonas</i>             | 0.01 | 494   | <i>Heliobacterium</i>           | 0.00 | 205   | <i>Plantibacter</i>         |
| 0.25  | 18513  | <i>Parabacteroides</i>           | 0.01 | 494   | <i>Cryobacterium</i>            | 0.00 | 205   | <i>Stomatobaculum</i>       |
| 0.23  | 16893  | <i>Bacillus</i>                  | 0.01 | 492   | <i>Vitrella</i>                 | 0.00 | 204   | <i>Stentor</i>              |
| 0.22  | 15850  | <i>Burkholderia</i>              | 0.01 | 490   | <i>Metarhizium</i>              | 0.00 | 204   | <i>Emmonsia</i>             |
| 0.21  | 15561  | <i>Methanothermobacter</i>       | 0.01 | 490   | <i>Snodgrassella</i>            | 0.00 | 204   | <i>Actinobaculum</i>        |
| 0.20  | 14845  | <i>Thauera</i>                   | 0.01 | 488   | <i>Acidaminobacter</i>          | 0.00 | 204   | <i>Thermoactinospora</i>    |
| 0.20  | 14453  | <i>Rhodococcus</i>               | 0.01 | 487   | <i>Pelotomaculum</i>            | 0.00 | 204   | <i>Wenyingzhuangia</i>      |
| 0.19  | 14140  | <i>Rhizobium</i>                 | 0.01 | 485   | <i>Lamprocystis</i>             | 0.00 | 203   | <i>Thermomicrobium</i>      |
| 0.18  | 13022  | <i>Methylocystis</i>             | 0.01 | 485   | <i>Lampropedia</i>              | 0.00 | 203   | <i>Phlebia</i>              |
| 0.18  | 12861  | <i>Propionivibrio</i>            | 0.01 | 485   | <i>Thermincola</i>              | 0.00 | 203   | <i>Pleurotus</i>            |
| 0.17  | 12729  | <i>Eubacterium</i>               | 0.01 | 485   | <i>Candidatus Magnetoglobus</i> | 0.00 | 203   | <i>Auraticoccus</i>         |
| 0.17  | 12318  | <i>Acinetobacter</i>             | 0.01 | 484   | <i>Geoalkalibacter</i>          | 0.00 | 202   | <i>Herbiconiux</i>          |
| 0.16  | 11663  | <i>Azoarcus</i>                  | 0.01 | 483   | <i>Ferrimonas</i>               | 0.00 | 202   | <i>Schleiferia</i>          |
| 0.16  | 11530  | <i>Treponema</i>                 | 0.01 | 482   | <i>Senegalimassilia</i>         | 0.00 | 202   | <i>Catalinimonas</i>        |

|      |       |                               |      |     |                                 |      |     |                               |
|------|-------|-------------------------------|------|-----|---------------------------------|------|-----|-------------------------------|
| 0.15 | 11239 | <i>Aminobacterium</i>         | 0.01 | 479 | <i>Candidatus Entotheonella</i> | 0.00 | 201 | <i>Desulfurella</i>           |
| 0.15 | 11036 | <i>Alistipes</i>              | 0.01 | 478 | <i>Flammeovirga</i>             | 0.00 | 201 | <i>Terasakiella</i>           |
| 0.15 | 10993 | <i>Sphaerochaeta</i>          | 0.01 | 478 | <i>Virgibacillus</i>            | 0.00 | 201 | <i>Caldanaerobacter</i>       |
| 0.14 | 10608 | <i>Smithella</i>              | 0.01 | 472 | <i>Leminorella</i>              | 0.00 | 201 | <i>Tamlana</i>                |
| 0.14 | 10311 | <i>Syntrophorhabdus</i>       | 0.01 | 472 | <i>Lutibacter</i>               | 0.00 | 200 | <i>Candidatus Microthrix</i>  |
| 0.14 | 10104 | <i>Azonexus</i>               | 0.01 | 471 | <i>Bartonella</i>               | 0.00 | 200 | <i>Roseateles</i>             |
| 0.13 | 9504  | <i>Acidovorax</i>             | 0.01 | 471 | <i>Planktothrix</i>             | 0.00 | 200 | <i>Thermoleophilum</i>        |
| 0.11 | 8249  | <i>Dehalobacter</i>           | 0.01 | 468 | <i>Gonapodya</i>                | 0.00 | 200 | <i>Geothermobacter</i>        |
| 0.11 | 7973  | <i>Lactobacillus</i>          | 0.01 | 467 | <i>Lentzea</i>                  | 0.00 | 199 | <i>Rubellimicrobium</i>       |
| 0.11 | 7912  | <i>Zoogloea</i>               | 0.01 | 465 | <i>Desulfobacula</i>            | 0.00 | 199 | <i>Caenispirillum</i>         |
| 0.10 | 7145  | <i>Syntrophobacter</i>        | 0.01 | 465 | <i>Fuerstia</i>                 | 0.00 | 199 | <i>Candidatus Izimaplasma</i> |
| 0.10 | 7055  | <i>Ruminococcus</i>           | 0.01 | 464 | <i>Succiniclasticum</i>         | 0.00 | 198 | <i>Pestalotiopsis</i>         |
| 0.10 | 7016  | <i>Kosmotoga</i>              | 0.01 | 463 | <i>Giesbergeria</i>             | 0.00 | 198 | <i>Granulicoccus</i>          |
| 0.09 | 6924  | <i>Desulfomonile</i>          | 0.01 | 463 | <i>Pararhodospirillum</i>       | 0.00 | 198 | <i>Baudoinia</i>              |
| 0.09 | 6529  | <i>Desulfotomaculum</i>       | 0.01 | 462 | <i>Limnochorda</i>              | 0.00 | 197 | <i>Tilletiaria</i>            |
| 0.09 | 6523  | <i>Bradyrhizobium</i>         | 0.01 | 461 | <i>Azorhizobium</i>             | 0.00 | 197 | <i>Aestuariimicrobium</i>     |
| 0.09 | 6491  | <i>Geobacter</i>              | 0.01 | 460 | <i>Nonlabens</i>                | 0.00 | 197 | <i>Caldibacillus</i>          |
| 0.09 | 6278  | <i>Achromobacter</i>          | 0.01 | 459 | <i>Bodo</i>                     | 0.00 | 197 | <i>Silvibacterium</i>         |
| 0.09 | 6240  | <i>Actinomyces</i>            | 0.01 | 459 | <i>Brachymonas</i>              | 0.00 | 196 | <i>Grifola</i>                |
| 0.08 | 6165  | <i>Methyloversatilis</i>      | 0.01 | 459 | <i>Myroides</i>                 | 0.00 | 196 | <i>Algiphilus</i>             |
| 0.08 | 6138  | <i>Flavobacterium</i>         | 0.01 | 459 | <i>Asticcacaulis</i>            | 0.00 | 196 | <i>Arcticibacter</i>          |
| 0.08 | 6132  | <i>Sphingomonas</i>           | 0.01 | 458 | <i>Planctomicrobium</i>         | 0.00 | 195 | <i>Edwardsiella</i>           |
| 0.08 | 6126  | <i>Anaerolinea</i>            | 0.01 | 457 | <i>Herpetosiphon</i>            | 0.00 | 195 | <i>Kytococcus</i>             |
| 0.08 | 6022  | <i>Paenirhodobacter</i>       | 0.01 | 457 | <i>Methanosalsum</i>            | 0.00 | 195 | <i>Batrachochytrium</i>       |
| 0.08 | 5933  | <i>Syntrophus</i>             | 0.01 | 457 | <i>Luteibacter</i>              | 0.00 | 195 | <i>Ornithinibacillus</i>      |
| 0.08 | 5818  | <i>Microbacterium</i>         | 0.01 | 457 | <i>Gorillibacterium</i>         | 0.00 | 195 | <i>Nitrososphaera</i>         |
| 0.07 | 5407  | <i>Nocardia</i>               | 0.01 | 456 | <i>Crocinitomix</i>             | 0.00 | 195 | <i>Halogramum</i>             |
| 0.07 | 5406  | <i>Aminiphilus</i>            | 0.01 | 456 | <i>Mahella</i>                  | 0.00 | 195 | <i>Croceicoccus</i>           |
| 0.07 | 5348  | <i>Syntrophomonas</i>         | 0.01 | 454 | <i>Proteiniborus</i>            | 0.00 | 194 | <i>Helicosporidium</i>        |
| 0.07 | 5285  | <i>Candidatus Cloacimonas</i> | 0.01 | 454 | <i>Roseimaritima</i>            | 0.00 | 194 | <i>Serinicoccus</i>           |
| 0.07 | 5270  | <i>Crenobacter</i>            | 0.01 | 453 | <i>Leptothrix</i>               | 0.00 | 194 | <i>Pseudoduganella</i>        |
| 0.07 | 5162  | <i>Nitrosomonas</i>           | 0.01 | 452 | <i>Anaerosporomusa</i>          | 0.00 | 194 | <i>Phaeodactylibacter</i>     |
| 0.07 | 5156  | <i>Micromonospora</i>         | 0.01 | 451 | <i>Pseudanabaena</i>            | 0.00 | 194 | <i>Massilibacterium</i>       |
| 0.07 | 5151  | <i>Massilia</i>               | 0.01 | 451 | <i>Candidatus Symbiothrix</i>   | 0.00 | 193 | <i>Vagococcus</i>             |
| 0.07 | 5067  | <i>Thiobacillus</i>           | 0.01 | 451 | <i>Gallaecimonas</i>            | 0.00 | 193 | <i>Piscicoccus</i>            |
| 0.07 | 4973  | <i>Paraburkholderia</i>       | 0.01 | 450 | <i>Altererythrobacter</i>       | 0.00 | 193 | <i>Gynuella</i>               |



|      |      |                           |      |     |                                   |      |     |                               |
|------|------|---------------------------|------|-----|-----------------------------------|------|-----|-------------------------------|
| 0.07 | 4832 | <i>Ruminiclostridium</i>  | 0.01 | 449 | <i>Exidia</i>                     | 0.00 | 193 | <i>Phoceia</i>                |
| 0.07 | 4830 | <i>Flexilinea</i>         | 0.01 | 449 | <i>Petrimonas</i>                 | 0.00 | 192 | <i>Phytomonas</i>             |
| 0.06 | 4716 | <i>Dethiosulfovibrio</i>  | 0.01 | 448 | <i>Psychroflexus</i>              | 0.00 | 192 | <i>Desulfohalobium</i>        |
| 0.06 | 4671 | <i>Methylococcus</i>      | 0.01 | 447 | <i>Aphanomyces</i>                | 0.00 | 192 | <i>Facklamia</i>              |
| 0.06 | 4564 | <i>Herminiimonas</i>      | 0.01 | 447 | <i>Minicystis</i>                 | 0.00 | 192 | <i>Pannonibacter</i>          |
| 0.06 | 4522 | <i>Vibrio</i>             | 0.01 | 446 | <i>Nitrosococcus</i>              | 0.00 | 192 | <i>Salinarimonas</i>          |
| 0.06 | 4502 | <i>Cupriavidus</i>        | 0.01 | 446 | <i>Nevskia</i>                    | 0.00 | 192 | <i>Magaeibacillus</i>         |
| 0.06 | 4499 | <i>Chromobacterium</i>    | 0.01 | 444 | <i>Diplodia</i>                   | 0.00 | 192 | <i>Cephaloticoccus</i>        |
| 0.06 | 4493 | <i>Olsenella</i>          | 0.01 | 444 | <i>Idiomarina</i>                 | 0.00 | 190 | <i>Luteococcus</i>            |
| 0.06 | 4487 | <i>Bordetella</i>         | 0.01 | 444 | <i>Gemmobacter</i>                | 0.00 | 190 | <i>Chroococcidiopsis</i>      |
| 0.06 | 4393 | <i>Methanoculleus</i>     | 0.01 | 444 | <i>Advenella</i>                  | 0.00 | 190 | <i>Tremella</i>               |
| 0.06 | 4365 | <i>Herbaspirillum</i>     | 0.01 | 442 | <i>Psychromonas</i>               | 0.00 | 190 | <i>Kordia</i>                 |
| 0.06 | 4329 | <i>Sulfurovum</i>         | 0.01 | 442 | <i>Hammondia</i>                  | 0.00 | 190 | <i>Simplicispira</i>          |
| 0.06 | 4241 | <i>Pedobacter</i>         | 0.01 | 440 | <i>Laccaria</i>                   | 0.00 | 190 | <i>Kiloniella</i>             |
| 0.06 | 4231 | <i>Methylomonas</i>       | 0.01 | 440 | <i>Rubroacter</i>                 | 0.00 | 190 | <i>Candidatus Magnetoovum</i> |
| 0.06 | 4206 | <i>Desulfosporosinus</i>  | 0.01 | 438 | <i>Mortierella</i>                | 0.00 | 189 | <i>Bizionia</i>               |
| 0.06 | 4183 | <i>Xanthomonas</i>        | 0.01 | 438 | <i>Carboxydocella</i>             | 0.00 | 189 | <i>Grosmannia</i>             |
| 0.06 | 4091 | <i>Chryseobacterium</i>   | 0.01 | 437 | <i>Pusillimonas</i>               | 0.00 | 189 | <i>Aquicola</i>               |
| 0.05 | 4012 | <i>Methylobacterium</i>   | 0.01 | 436 | <i>Xenorhabdus</i>                | 0.00 | 189 | <i>Aggregatibacter</i>        |
| 0.05 | 3962 | <i>Aminomonas</i>         | 0.01 | 436 | <i>Pelagibacterium</i>            | 0.00 | 188 | <i>Borrelia</i>               |
| 0.05 | 3939 | <i>Frankia</i>            | 0.01 | 436 | <i>Desulfamplus</i>               | 0.00 | 188 | <i>Catonella</i>              |
| 0.05 | 3885 | <i>Lachnoclostridium</i>  | 0.01 | 436 | <i>Candidatus Thiodiazotropha</i> | 0.00 | 188 | <i>Desulfonispora</i>         |
| 0.05 | 3858 | <i>Ralstonia</i>          | 0.01 | 436 | <i>Arabia</i>                     | 0.00 | 188 | <i>Rhizoclostridium</i>       |
| 0.05 | 3837 | <i>Synergistes</i>        | 0.01 | 435 | <i>Rhodothermus</i>               | 0.00 | 188 | <i>Camnicella</i>             |
| 0.05 | 3821 | <i>Legionella</i>         | 0.01 | 435 | <i>Gaeumannomyces</i>             | 0.00 | 188 | <i>Proteocatella</i>          |
| 0.05 | 3818 | <i>Corynebacterium</i>    | 0.01 | 434 | <i>Cyanobium</i>                  | 0.00 | 188 | <i>Thalassobacillus</i>       |
| 0.05 | 3734 | <i>Novosphingobium</i>    | 0.01 | 433 | <i>Herbidospora</i>               | 0.00 | 188 | <i>Moelleriella</i>           |
| 0.05 | 3682 | <i>Mesorhizobium</i>      | 0.01 | 432 | <i>Microlunatus</i>               | 0.00 | 187 | <i>Flexibacter</i>            |
| 0.05 | 3608 | <i>Uliginosibacterium</i> | 0.01 | 431 | <i>Leptospirillum</i>             | 0.00 | 187 | <i>Schizophyllum</i>          |
| 0.05 | 3545 | <i>Cloacibacillus</i>     | 0.01 | 431 | <i>Dietzia</i>                    | 0.00 | 187 | <i>Microbotryum</i>           |
| 0.05 | 3500 | <i>Arthrobacter</i>       | 0.01 | 431 | <i>Glycomyces</i>                 | 0.00 | 187 | <i>Ferroglobus</i>            |
| 0.05 | 3464 | <i>Thiomonas</i>          | 0.01 | 430 | <i>Desulforhopalus</i>            | 0.00 | 187 | <i>Adhaeribacter</i>          |
| 0.05 | 3435 | <i>Levilinea</i>          | 0.01 | 430 | <i>Hahella</i>                    | 0.00 | 187 | <i>Terrisporobacter</i>       |
| 0.05 | 3426 | <i>Azospirillum</i>       | 0.01 | 430 | <i>Methanotorris</i>              | 0.00 | 186 | <i>Phyllobacterium</i>        |
| 0.05 | 3410 | <i>Butyrivibrio</i>       | 0.01 | 430 | <i>Orrella</i>                    | 0.00 | 186 | <i>Psychroserpens</i>         |
| 0.04 | 3250 | <i>Variovorax</i>         | 0.01 | 430 | <i>Kiritimatiella</i>             | 0.00 | 186 | <i>Malassezia</i>             |

|      |      |                          |      |     |                                 |      |     |                               |
|------|------|--------------------------|------|-----|---------------------------------|------|-----|-------------------------------|
| 0.04 | 3231 | <i>Longilinea</i>        | 0.01 | 429 | <i>Chlorella</i>                | 0.00 | 186 | <i>Rhizophagus</i>            |
| 0.04 | 3169 | <i>Porphyromonas</i>     | 0.01 | 428 | <i>Polaribacter</i>             | 0.00 | 186 | <i>Cutaneotrichosporon</i>    |
| 0.04 | 3159 | <i>Eimeria</i>           | 0.01 | 428 | <i>Alicyciphilus</i>            | 0.00 | 185 | <i>Cycloclasticus</i>         |
| 0.04 | 3140 | <i>Pseudonocardia</i>    | 0.01 | 427 | <i>Hydrogenoanaerobacterium</i> | 0.00 | 185 | <i>Ustilaginoidea</i>         |
| 0.04 | 3064 | <i>Dysgonomonas</i>      | 0.01 | 427 | <i>Verticillium</i>             | 0.00 | 185 | <i>Rubritepida</i>            |
| 0.04 | 3062 | <i>Janthinobacterium</i> | 0.01 | 425 | <i>Mobilibacterium</i>          | 0.00 | 185 | <i>Endomicrobium</i>          |
| 0.04 | 3049 | <i>Comamonas</i>         | 0.01 | 424 | <i>Enterovibrio</i>             | 0.00 | 185 | <i>Wenzhouxiangella</i>       |
| 0.04 | 3045 | <i>Chitinophaga</i>      | 0.01 | 423 | <i>Sporocytophaga</i>           | 0.00 | 184 | <i>Rikenella</i>              |
| 0.04 | 3035 | <i>Aquaspirillum</i>     | 0.01 | 421 | <i>Propionispira</i>            | 0.00 | 184 | <i>Macrophomina</i>           |
| 0.04 | 3002 | <i>Halomonas</i>         | 0.01 | 421 | <i>Chthoniobacter</i>           | 0.00 | 184 | <i>Desulfurispirillum</i>     |
| 0.04 | 2998 | <i>Streptococcus</i>     | 0.01 | 421 | <i>Lachancea</i>                | 0.00 | 184 | <i>Lishizhenia</i>            |
| 0.04 | 2984 | <i>Derxia</i>            | 0.01 | 421 | <i>Saccharicrinis</i>           | 0.00 | 183 | <i>Teredinibacter</i>         |
| 0.04 | 2916 | <i>Curvibacter</i>       | 0.01 | 420 | <i>Methanocorpusculum</i>       | 0.00 | 183 | <i>Rhinoclaadiella</i>        |
| 0.04 | 2900 | <i>Hyphomicrobium</i>    | 0.01 | 420 | <i>Marinilabilia</i>            | 0.00 | 183 | <i>Heterobasidion</i>         |
| 0.04 | 2855 | <i>Methanoregula</i>     | 0.01 | 420 | <i>Caldicoprobacter</i>         | 0.00 | 183 | <i>Cyanobacterium</i>         |
| 0.04 | 2808 | <i>Leptolinea</i>        | 0.01 | 418 | <i>Bipolaris</i>                | 0.00 | 183 | <i>Novispirillum</i>          |
| 0.04 | 2771 | <i>Amycolatopsis</i>     | 0.01 | 418 | <i>Prostheco bacter</i>         | 0.00 | 183 | <i>Novibacillus</i>           |
| 0.04 | 2723 | <i>Acidaminococcus</i>   | 0.01 | 418 | <i>Candidatus Koribacter</i>    | 0.00 | 182 | <i>Thermosediminibacter</i>   |
| 0.04 | 2703 | <i>Methanocella</i>      | 0.01 | 417 | <i>Halorubrum</i>               | 0.00 | 182 | <i>Pseudosphingobacterium</i> |
| 0.04 | 2697 | <i>Stenotrophomonas</i>  | 0.01 | 415 | <i>Pyrococcus</i>               | 0.00 | 182 | <i>Schizopora</i>             |
| 0.04 | 2677 | <i>Azotobacter</i>       | 0.01 | 415 | <i>Fictibacillus</i>            | 0.00 | 181 | <i>Albugo</i>                 |
| 0.04 | 2677 | <i>Rhodobacter</i>       | 0.01 | 414 | <i>Fonsecaea</i>                | 0.00 | 181 | <i>Coniophora</i>             |
| 0.04 | 2669 | <i>Sulfuritalea</i>      | 0.01 | 414 | <i>Kutzneria</i>                | 0.00 | 181 | <i>Blastomyces</i>            |
| 0.04 | 2659 | <i>Methanosphaera</i>    | 0.01 | 414 | <i>Conexibacter</i>             | 0.00 | 181 | <i>Geopsychrobacter</i>       |
| 0.04 | 2625 | <i>Faecalibacterium</i>  | 0.01 | 414 | <i>Gottschalkia</i>             | 0.00 | 181 | <i>Pyrenochaeta</i>           |
| 0.03 | 2559 | <i>Marinobacter</i>      | 0.01 | 413 | <i>Providencia</i>              | 0.00 | 181 | <i>Caldalkalibacillus</i>     |
| 0.03 | 2528 | <i>Acetobacter</i>       | 0.01 | 413 | <i>Bryobacter</i>               | 0.00 | 180 | <i>Spirillospora</i>          |
| 0.03 | 2516 | <i>Methanothermus</i>    | 0.01 | 412 | <i>Geobacillus</i>              | 0.00 | 180 | <i>Planktothricoides</i>      |
| 0.03 | 2509 | <i>Spirochaeta</i>       | 0.01 | 412 | <i>Kribbella</i>                | 0.00 | 180 | <i>Actinocatenispora</i>      |
| 0.03 | 2499 | <i>Ideonella</i>         | 0.01 | 410 | <i>Kerstesia</i>                | 0.00 | 179 | <i>Haladaptatus</i>           |
| 0.03 | 2499 | <i>Paludibacter</i>      | 0.01 | 410 | <i>Zavarzinella</i>             | 0.00 | 178 | <i>Podospora</i>              |
| 0.03 | 2489 | <i>Nocardioiodes</i>     | 0.01 | 410 | <i>Paludisphaera</i>            | 0.00 | 178 | <i>Riemerella</i>             |
| 0.03 | 2445 | <i>Thermanaerovibrio</i> | 0.01 | 409 | <i>Acanthamoeba</i>             | 0.00 | 178 | <i>Gluconacetobacter</i>      |
| 0.03 | 2431 | <i>Hydrogenophaga</i>    | 0.01 | 409 | <i>Gloeobacter</i>              | 0.00 | 178 | <i>Madurella</i>              |
| 0.03 | 2423 | <i>Cellulomonas</i>      | 0.01 | 409 | <i>Trichococcus</i>             | 0.00 | 178 | <i>Gallibacterium</i>         |
| 0.03 | 2421 | <i>Bifidobacterium</i>   | 0.01 | 409 | <i>Terriglobus</i>              | 0.00 | 178 | <i>Peptoanaerobacter</i>      |

|      |      |                           |      |     |                                  |      |     |                              |
|------|------|---------------------------|------|-----|----------------------------------|------|-----|------------------------------|
| 0.03 | 2408 | <i>Aspergillus</i>        | 0.01 | 408 | <i>Gracilibacillus</i>           | 0.00 | 177 | <i>Gemella</i>               |
| 0.03 | 2393 | <i>Pandoraea</i>          | 0.01 | 407 | <i>Actinoalloteichus</i>         | 0.00 | 177 | <i>Fomitopsis</i>            |
| 0.03 | 2385 | <i>Desulfacinum</i>       | 0.01 | 406 | <i>Tolypothrix</i>               | 0.00 | 177 | <i>Arthrospira</i>           |
| 0.03 | 2372 | <i>Sphingobacterium</i>   | 0.01 | 406 | <i>Anaerostipes</i>              | 0.00 | 177 | <i>Daedalea</i>              |
| 0.03 | 2371 | <i>Mucilaginibacter</i>   | 0.01 | 406 | <i>Methyloceanibacter</i>        | 0.00 | 177 | <i>Empedobacter</i>          |
| 0.03 | 2362 | <i>Caulobacter</i>        | 0.01 | 405 | <i>Rhodospirillum</i>            | 0.00 | 177 | <i>Rivularia</i>             |
| 0.03 | 2340 | <i>Papillibacter</i>      | 0.01 | 404 | <i>Taylorella</i>                | 0.00 | 177 | <i>Nitriliruptor</i>         |
| 0.03 | 2339 | <i>Paracoccus</i>         | 0.01 | 404 | <i>Phialocephala</i>             | 0.00 | 176 | <i>Trichosporon</i>          |
| 0.03 | 2329 | <i>Enterococcus</i>       | 0.01 | 404 | <i>Fluviicola</i>                | 0.00 | 176 | <i>Acidomonas</i>            |
| 0.03 | 2325 | <i>Selenomonas</i>        | 0.01 | 403 | <i>Psychrobacter</i>             | 0.00 | 176 | <i>Saccharibacillus</i>      |
| 0.03 | 2303 | <i>Nocardiosis</i>        | 0.01 | 403 | <i>Allochroamium</i>             | 0.00 | 176 | <i>Lachnoanaerobaculum</i>   |
| 0.03 | 2261 | <i>Methanolinea</i>       | 0.01 | 403 | <i>Arenibacter</i>               | 0.00 | 176 | <i>Fervidicella</i>          |
| 0.03 | 2251 | <i>Deinococcus</i>        | 0.01 | 402 | <i>Barnesiella</i>               | 0.00 | 176 | <i>Apibacter</i>             |
| 0.03 | 2249 | <i>Christensenella</i>    | 0.01 | 402 | <i>Desulfopila</i>               | 0.00 | 175 | <i>Giardia</i>               |
| 0.03 | 2238 | <i>Acetomicrobium</i>     | 0.01 | 401 | <i>Gimesia</i>                   | 0.00 | 175 | <i>Oerskovia</i>             |
| 0.03 | 2233 | <i>Gordonia</i>           | 0.01 | 400 | <i>Salpingoeca</i>               | 0.00 | 175 | <i>Jaapia</i>                |
| 0.03 | 2214 | <i>Tepidiphilus</i>       | 0.01 | 400 | <i>Pectobacterium</i>            | 0.00 | 175 | <i>Pseudodonghicola</i>      |
| 0.03 | 2213 | <i>Rhodopseudomonas</i>   | 0.01 | 399 | <i>Microcystis</i>               | 0.00 | 175 | <i>Lunatimonas</i>           |
| 0.03 | 2208 | <i>Porphyra</i>           | 0.01 | 398 | <i>Shinella</i>                  | 0.00 | 175 | <i>Traorella</i>             |
| 0.03 | 2195 | <i>Ornatilinea</i>        | 0.01 | 397 | <i>Streptosporangium</i>         | 0.00 | 174 | <i>Ascosphaera</i>           |
| 0.03 | 2180 | <i>Arcobacter</i>         | 0.01 | 397 | <i>Desulfonatronovibrio</i>      | 0.00 | 174 | <i>Kinetoplastibacterium</i> |
| 0.03 | 2139 | <i>Desulfocurvus</i>      | 0.01 | 397 | <i>Candidatus Contendobacter</i> | 0.00 | 174 | <i>Clavispora</i>            |
| 0.03 | 2082 | <i>Desulfitobacterium</i> | 0.01 | 395 | <i>Candidatus Tenderia</i>       | 0.00 | 174 | <i>Ketogulonicigenium</i>    |
| 0.03 | 2081 | <i>Hymenobacter</i>       | 0.01 | 393 | <i>Haemophilus</i>               | 0.00 | 174 | <i>Anaeroarcus</i>           |
| 0.03 | 2054 | <i>Shewanella</i>         | 0.01 | 393 | <i>Syntrophobotulus</i>          | 0.00 | 174 | <i>Ogataea</i>               |
| 0.03 | 2037 | <i>Actinomadura</i>       | 0.01 | 393 | <i>Desulfonauticus</i>           | 0.00 | 173 | <i>Hanseniaspora</i>         |
| 0.03 | 2014 | <i>Desulfobulbus</i>      | 0.01 | 393 | <i>Sandaracinus</i>              | 0.00 | 173 | <i>Magnaporthiopsis</i>      |
| 0.03 | 2013 | <i>Thioalkalivibrio</i>   | 0.01 | 391 | <i>Tissierella</i>               | 0.00 | 173 | <i>Hugenholtzia</i>          |
| 0.03 | 2006 | <i>Methylotenera</i>      | 0.01 | 391 | <i>Domibacillus</i>              | 0.00 | 172 | <i>Gelatoporia</i>           |
| 0.03 | 1990 | <i>Alicyclobacillus</i>   | 0.01 | 390 | <i>Phormidium</i>                | 0.00 | 172 | <i>Pochonia</i>              |
| 0.03 | 1984 | <i>Pseudogulbenkiana</i>  | 0.01 | 389 | <i>Halolactibacillus</i>         | 0.00 | 172 | <i>Edaphobacter</i>          |
| 0.03 | 1979 | <i>Thioclava</i>          | 0.01 | 386 | <i>Modestobacter</i>             | 0.00 | 172 | <i>Sugiyamaella</i>          |
| 0.03 | 1973 | <i>Leptospira</i>         | 0.01 | 384 | <i>Chrysochromulina</i>          | 0.00 | 172 | <i>Succinatimonas</i>        |
| 0.03 | 1971 | <i>Actinoplanes</i>       | 0.01 | 383 | <i>Salinisphaera</i>             | 0.00 | 172 | <i>Sinosporangium</i>        |
| 0.03 | 1968 | <i>Lautropia</i>          | 0.01 | 382 | <i>Akkermansia</i>               | 0.00 | 172 | <i>Hydrogenibacillus</i>     |
| 0.03 | 1966 | <i>Nitrospira</i>         | 0.01 | 381 | <i>Auricularia</i>               | 0.00 | 171 | <i>Gloeophyllum</i>          |

|      |      |                                   |      |     |                                  |      |     |                                |
|------|------|-----------------------------------|------|-----|----------------------------------|------|-----|--------------------------------|
| 0.03 | 1959 | <i>Eggerthella</i>                | 0.01 | 380 | <i>Desulfospira</i>              | 0.00 | 171 | <i>Postia</i>                  |
| 0.03 | 1958 | <i>Anaerotruncus</i>              | 0.01 | 380 | <i>Kouleoethrix</i>              | 0.00 | 171 | <i>Pseudopropionibacterium</i> |
| 0.03 | 1956 | <i>Delftia</i>                    | 0.01 | 379 | <i>Leucosporidium</i>            | 0.00 | 170 | <i>Catenuloplanes</i>          |
| 0.03 | 1954 | <i>Methanospirillum</i>           | 0.01 | 379 | <i>Guillardia</i>                | 0.00 | 170 | <i>Aquiflexum</i>              |
| 0.03 | 1953 | <i>Campylobacter</i>              | 0.01 | 378 | <i>Saprolegnia</i>               | 0.00 | 170 | <i>Obba</i>                    |
| 0.03 | 1940 | <i>Nitrospira</i>                 | 0.01 | 378 | <i>Natronincola</i>              | 0.00 | 170 | <i>Coniosporium</i>            |
| 0.03 | 1887 | <i>Pelobacter</i>                 | 0.01 | 378 | <i>Actinophytocola</i>           | 0.00 | 170 | <i>Ileibacterium</i>           |
| 0.03 | 1884 | <i>Algoriphagus</i>               | 0.01 | 377 | <i>Lutispora</i>                 | 0.00 | 169 | <i>Methanomicrobium</i>        |
| 0.03 | 1880 | <i>Sulfuricella</i>               | 0.01 | 375 | <i>Skermanella</i>               | 0.00 | 169 | <i>Amanita</i>                 |
| 0.03 | 1876 | <i>Kitasatospora</i>              | 0.01 | 373 | <i>Thermoactinomyces</i>         | 0.00 | 169 | <i>Pyronema</i>                |
| 0.03 | 1875 | <i>Devosia</i>                    | 0.01 | 373 | <i>Tindallia</i>                 | 0.00 | 169 | <i>Ferroplasma</i>             |
| 0.03 | 1870 | <i>Collinsella</i>                | 0.01 | 373 | <i>Deefgea</i>                   | 0.00 | 169 | <i>Acremonium</i>              |
| 0.03 | 1866 | <i>Neisseria</i>                  | 0.01 | 372 | <i>Ustilago</i>                  | 0.00 | 169 | <i>Pelagibaca</i>              |
| 0.03 | 1851 | <i>Pirellula</i>                  | 0.01 | 372 | <i>Gilliamella</i>               | 0.00 | 169 | <i>Ceraceosorus</i>            |
| 0.03 | 1849 | <i>Rhodopirellula</i>             | 0.01 | 372 | <i>Mariniblastus</i>             | 0.00 | 169 | <i>Terribacillus</i>           |
| 0.03 | 1844 | <i>Nonomuraea</i>                 | 0.01 | 370 | <i>Coriobacterium</i>            | 0.00 | 168 | <i>Methanocalculus</i>         |
| 0.03 | 1841 | <i>Desulfuromonas</i>             | 0.01 | 369 | <i>Sulfolobus</i>                | 0.00 | 168 | <i>Asanoa</i>                  |
| 0.03 | 1835 | <i>Sphingobium</i>                | 0.01 | 369 | <i>Salinicoccus</i>              | 0.00 | 168 | <i>Allisonella</i>             |
| 0.03 | 1833 | <i>Candidatus Methanoperedens</i> | 0.01 | 369 | <i>Thiorhodovibrio</i>           | 0.00 | 168 | <i>Enhydrobacter</i>           |
| 0.02 | 1828 | <i>Polaromonas</i>                | 0.01 | 368 | <i>Fournierella</i>              | 0.00 | 168 | <i>Thermodesulfobium</i>       |
| 0.02 | 1817 | <i>Synechococcus</i>              | 0.01 | 367 | <i>Flavisolibacter</i>           | 0.00 | 168 | <i>Candidatus Kuenenia</i>     |
| 0.02 | 1814 | <i>Thermotoga</i>                 | 0.01 | 367 | <i>Intestinimonas</i>            | 0.00 | 168 | <i>Sharpea</i>                 |
| 0.02 | 1810 | <i>Thermovirga</i>                | 0.00 | 366 | <i>Bulleidia</i>                 | 0.00 | 167 | <i>Pichia</i>                  |
| 0.02 | 1803 | <i>Blautia</i>                    | 0.00 | 365 | <i>Desulfovermiculus</i>         | 0.00 | 167 | <i>Ilyobacter</i>              |
| 0.02 | 1802 | <i>Roseburia</i>                  | 0.00 | 363 | <i>Pelodictyon</i>               | 0.00 | 167 | <i>Silanimonas</i>             |
| 0.02 | 1787 | <i>Leucobacter</i>                | 0.00 | 363 | <i>Neocallimastix</i>            | 0.00 | 167 | <i>Marssonina</i>              |
| 0.02 | 1780 | <i>Sporomusa</i>                  | 0.00 | 362 | <i>Candidatus Competibacter</i>  | 0.00 | 167 | <i>Hoyosella</i>               |
| 0.02 | 1769 | <i>Pseudoflavonifractor</i>       | 0.00 | 362 | <i>Candidatus Methylopumilus</i> | 0.00 | 166 | <i>Kluyveromyces</i>           |
| 0.02 | 1765 | <i>Methanolobus</i>               | 0.00 | 361 | <i>Rhodocista</i>                | 0.00 | 166 | <i>Tepidimicrobium</i>         |
| 0.02 | 1763 | <i>Candidatus Aegiribacteria</i>  | 0.00 | 361 | <i>Fusibacter</i>                | 0.00 | 166 | <i>Phaeobacter</i>             |
| 0.02 | 1751 | <i>Bosea</i>                      | 0.00 | 361 | <i>Aequorivita</i>               | 0.00 | 166 | <i>Cutibacterium</i>           |
| 0.02 | 1750 | <i>Methylobacillus</i>            | 0.00 | 360 | <i>Peptostreptococcus</i>        | 0.00 | 165 | <i>Thermomonospora</i>         |
| 0.02 | 1748 | <i>Aquitalea</i>                  | 0.00 | 360 | <i>Methanohalobium</i>           | 0.00 | 165 | <i>Acetohalobium</i>           |
| 0.02 | 1741 | <i>Desulfococcus</i>              | 0.00 | 360 | <i>Thermanaeromonas</i>          | 0.00 | 165 | <i>Succinivibrio</i>           |
| 0.02 | 1739 | <i>Agrobacterium</i>              | 0.00 | 358 | <i>Reticulomyxa</i>              | 0.00 | 164 | <i>Terrabacter</i>             |

|      |      |                          |      |     |                                   |      |     |                               |
|------|------|--------------------------|------|-----|-----------------------------------|------|-----|-------------------------------|
| 0.02 | 1724 | <i>Duganella</i>         | 0.00 | 358 | <i>Neglecta</i>                   | 0.00 | 164 | <i>Phlebiopsis</i>            |
| 0.02 | 1718 | <i>Helicobacter</i>      | 0.00 | 357 | <i>Muricauda</i>                  | 0.00 | 164 | <i>Truepera</i>               |
| 0.02 | 1713 | <i>Chitinimonas</i>      | 0.00 | 357 | <i>Herbinix</i>                   | 0.00 | 164 | <i>Fontibacillus</i>          |
| 0.02 | 1707 | <i>Aeromonas</i>         | 0.00 | 356 | <i>Porphyrobacter</i>             | 0.00 | 164 | <i>Hamadaea</i>               |
| 0.02 | 1698 | <i>Rugosibacter</i>      | 0.00 | 356 | <i>Acetonema</i>                  | 0.00 | 164 | <i>Catenovulum</i>            |
| 0.02 | 1697 | <i>Plasmodium</i>        | 0.00 | 356 | <i>Frateuria</i>                  | 0.00 | 163 | <i>Deferribacter</i>          |
| 0.02 | 1696 | <i>Lysobacter</i>        | 0.00 | 355 | <i>Haliscomenobacter</i>          | 0.00 | 163 | <i>Parvibaculum</i>           |
| 0.02 | 1695 | <i>Rhodoferax</i>        | 0.00 | 355 | <i>Cordyceps</i>                  | 0.00 | 163 | <i>Kordiimonas</i>            |
| 0.02 | 1693 | <i>Penicillium</i>       | 0.00 | 355 | <i>Halobacillus</i>               | 0.00 | 163 | <i>Phycisphaera</i>           |
| 0.02 | 1689 | <i>Colletotrichum</i>    | 0.00 | 355 | <i>Anaerovibrio</i>               | 0.00 | 163 | <i>Coleofasciculus</i>        |
| 0.02 | 1688 | <i>Polynucleobacter</i>  | 0.00 | 355 | <i>Inquilinus</i>                 | 0.00 | 163 | <i>Caldisalibacter</i>        |
| 0.02 | 1680 | <i>Desulfobacterium</i>  | 0.00 | 351 | <i>Symbiobacterium</i>            | 0.00 | 163 | <i>Arsenicibacter</i>         |
| 0.02 | 1670 | <i>Acidithiobacillus</i> | 0.00 | 351 | <i>Calocera</i>                   | 0.00 | 162 | <i>Pimelobacter</i>           |
| 0.02 | 1662 | <i>Phenylobacterium</i>  | 0.00 | 351 | <i>Moorea</i>                     | 0.00 | 162 | <i>Methanopyrus</i>           |
| 0.02 | 1660 | <i>Anaerovorax</i>       | 0.00 | 349 | <i>Sulfobacillus</i>              | 0.00 | 162 | <i>Schwartzia</i>             |
| 0.02 | 1651 | <i>Bellilinea</i>        | 0.00 | 347 | <i>Peniophora</i>                 | 0.00 | 162 | <i>Humibacter</i>             |
| 0.02 | 1646 | <i>Sorangium</i>         | 0.00 | 347 | <i>Congregibacter</i>             | 0.00 | 162 | <i>Aliivibrio</i>             |
| 0.02 | 1632 | <i>Collimonas</i>        | 0.00 | 347 | <i>Desulfuribacillus</i>          | 0.00 | 162 | <i>Verruconis</i>             |
| 0.02 | 1602 | <i>Pseudoalteromonas</i> | 0.00 | 346 | <i>Anabaena</i>                   | 0.00 | 162 | <i>Hathewayia</i>             |
| 0.02 | 1568 | <i>Atopobium</i>         | 0.00 | 346 | <i>Thermoanaerobaculum</i>        | 0.00 | 161 | <i>Polysphondylium</i>        |
| 0.02 | 1558 | <i>Marinitoga</i>        | 0.00 | 344 | <i>Planctopirus</i>               | 0.00 | 161 | <i>Methylopila</i>            |
| 0.02 | 1557 | <i>Andreprevotia</i>     | 0.00 | 343 | <i>Blastocystis</i>               | 0.00 | 161 | <i>Starkeya</i>               |
| 0.02 | 1556 | <i>Denitrobacterium</i>  | 0.00 | 342 | <i>Bacteriovorax</i>              | 0.00 | 161 | <i>Calditerrivibrio</i>       |
| 0.02 | 1555 | <i>Slackia</i>           | 0.00 | 342 | <i>Thermovenabulum</i>            | 0.00 | 161 | <i>Ajfella</i>                |
| 0.02 | 1515 | <i>Tannerella</i>        | 0.00 | 342 | <i>Candidatus Desulfofervidus</i> | 0.00 | 161 | <i>Paenisporosarcina</i>      |
| 0.02 | 1515 | <i>Pyramidobacter</i>    | 0.00 | 341 | <i>Dictyoglomus</i>               | 0.00 | 161 | <i>Massilioclostridium</i>    |
| 0.02 | 1511 | <i>Sunxiuqinia</i>       | 0.00 | 341 | <i>Salinispira</i>                | 0.00 | 160 | <i>Achlya</i>                 |
| 0.02 | 1507 | <i>Brevundimonas</i>     | 0.00 | 340 | <i>Roseivivax</i>                 | 0.00 | 160 | <i>Arcanobacterium</i>        |
| 0.02 | 1481 | <i>Coprobacillus</i>     | 0.00 | 340 | <i>Jannaschia</i>                 | 0.00 | 160 | <i>Rhodovibrio</i>            |
| 0.02 | 1477 | <i>Microvirgula</i>      | 0.00 | 340 | <i>Thiohalospira</i>              | 0.00 | 160 | <i>Turneriella</i>            |
| 0.02 | 1472 | <i>Desulfatibacillum</i> | 0.00 | 339 | <i>Coxiella</i>                   | 0.00 | 159 | <i>Agaricus</i>               |
| 0.02 | 1468 | <i>Sulfuricurvum</i>     | 0.00 | 339 | <i>Tritrichomonas</i>             | 0.00 | 159 | <i>Candidatus Arthromitus</i> |
| 0.02 | 1465 | <i>Photobacterium</i>    | 0.00 | 339 | <i>Microcoleus</i>                | 0.00 | 159 | <i>Halogeometricum</i>        |
| 0.02 | 1461 | <i>Rhodanobacter</i>     | 0.00 | 339 | <i>Frigoribacterium</i>           | 0.00 | 159 | <i>Propionimicrobium</i>      |
| 0.02 | 1457 | <i>Dyadobacter</i>       | 0.00 | 339 | <i>Caloranaerobacter</i>          | 0.00 | 159 | <i>Litoreibacter</i>          |
| 0.02 | 1448 | <i>Chitinibacter</i>     | 0.00 | 339 | <i>Fimbriimonas</i>               | 0.00 | 159 | <i>Kandleria</i>              |

|      |      |                                |      |     |                                    |      |     |                              |
|------|------|--------------------------------|------|-----|------------------------------------|------|-----|------------------------------|
| 0.02 | 1442 | <i>Staphylococcus</i>          | 0.00 | 338 | <i>Flexithrix</i>                  | 0.00 | 159 | <i>Sinomicrobium</i>         |
| 0.02 | 1436 | <i>Thiothrix</i>               | 0.00 | 338 | <i>Megamonas</i>                   | 0.00 | 158 | <i>Thermonema</i>            |
| 0.02 | 1434 | <i>Acetobacterium</i>          | 0.00 | 338 | <i>Serendipita</i>                 | 0.00 | 158 | <i>Geovibrio</i>             |
| 0.02 | 1433 | <i>Brevibacillus</i>           | 0.00 | 337 | <i>Gymnopus</i>                    | 0.00 | 158 | <i>Desulfotalea</i>          |
| 0.02 | 1432 | <i>Roseomonas</i>              | 0.00 | 337 | <i>Oceanibaculum</i>               | 0.00 | 158 | <i>Thiohalomonas</i>         |
| 0.02 | 1430 | <i>Spirosoma</i>               | 0.00 | 337 | <i>Candida</i>                     | 0.00 | 158 | <i>Geminicoccus</i>          |
| 0.02 | 1425 | <i>Fusobacterium</i>           | 0.00 | 337 | <i>Arachidicoccus</i>              | 0.00 | 158 | <i>Salisediminibacterium</i> |
| 0.02 | 1424 | <i>Rubrivivax</i>              | 0.00 | 336 | <i>Defluviimonas</i>               | 0.00 | 157 | <i>Spizellomyces</i>         |
| 0.02 | 1419 | <i>Desulfobacca</i>            | 0.00 | 334 | <i>Nannochloropsis</i>             | 0.00 | 157 | <i>Palaeococcus</i>          |
| 0.02 | 1417 | <i>Dehalococcoides</i>         | 0.00 | 334 | <i>Sanguibacter</i>                | 0.00 | 157 | <i>Halorhodospira</i>        |
| 0.02 | 1406 | <i>Fusarium</i>                | 0.00 | 334 | <i>Cryptosporangium</i>            | 0.00 | 157 | <i>Pseudaminobacter</i>      |
| 0.02 | 1404 | <i>Methylophilus</i>           | 0.00 | 334 | <i>Hippea</i>                      | 0.00 | 157 | <i>Cylindrobasidium</i>      |
| 0.02 | 1404 | <i>Desulfocarbo</i>            | 0.00 | 334 | <i>Roseivirga</i>                  | 0.00 | 157 | <i>Halioglobus</i>           |
| 0.02 | 1403 | <i>Thermococcus</i>            | 0.00 | 334 | <i>Candidatus Jettenia</i>         | 0.00 | 156 | <i>Limnothrix</i>            |
| 0.02 | 1396 | <i>Butyricococcus</i>          | 0.00 | 334 | <i>Methylomarinum</i>              | 0.00 | 156 | <i>Lobosporangium</i>        |
| 0.02 | 1378 | <i>Phascolarctobacterium</i>   | 0.00 | 332 | <i>Pseudorhodobacter</i>           | 0.00 | 156 | <i>Tuberibacillus</i>        |
| 0.02 | 1373 | <i>Candidatus Vecturithrix</i> | 0.00 | 332 | <i>Martelella</i>                  | 0.00 | 156 | <i>Rubritalea</i>            |
| 0.02 | 1371 | <i>Magnetospirillum</i>        | 0.00 | 332 | <i>Gracilibacter</i>               | 0.00 | 156 | <i>Pseudobacteriovorax</i>   |
| 0.02 | 1370 | <i>Sporobacter</i>             | 0.00 | 332 | <i>Granulicella</i>                | 0.00 | 155 | <i>Arhodomonas</i>           |
| 0.02 | 1367 | <i>Geodermatophilus</i>        | 0.00 | 331 | <i>Rugamonas</i>                   | 0.00 | 155 | <i>Bauldia</i>               |
| 0.02 | 1363 | <i>Sphingopyxis</i>            | 0.00 | 331 | <i>Fabibacter</i>                  | 0.00 | 155 | <i>Effusibacillus</i>        |
| 0.02 | 1359 | <i>Ferriphaselus</i>           | 0.00 | 330 | <i>Gillisia</i>                    | 0.00 | 154 | <i>Mycetocola</i>            |
| 0.02 | 1358 | <i>Vogesella</i>               | 0.00 | 329 | <i>Cellulophaga</i>                | 0.00 | 154 | <i>Jeotgalibacillus</i>      |
| 0.02 | 1347 | <i>Leptolyngbya</i>            | 0.00 | 328 | <i>Scytonema</i>                   | 0.00 | 154 | <i>Salimicrobium</i>         |
| 0.02 | 1346 | <i>Mycoplasma</i>              | 0.00 | 328 | <i>Lechevalieria</i>               | 0.00 | 153 | <i>Phaeodactylum</i>         |
| 0.02 | 1335 | <i>Dialister</i>               | 0.00 | 328 | <i>Sediminibacterium</i>           | 0.00 | 153 | <i>Paracoccidioides</i>      |
| 0.02 | 1330 | <i>Anaeromyxobacter</i>        | 0.00 | 326 | <i>Rachicladosporium</i>           | 0.00 | 153 | <i>Drechmeria</i>            |
| 0.02 | 1324 | <i>Methylibium</i>             | 0.00 | 326 | <i>Solitalea</i>                   | 0.00 | 153 | <i>Actinospica</i>           |
| 0.02 | 1321 | <i>Desulfatitalea</i>          | 0.00 | 325 | <i>Thermobifida</i>                | 0.00 | 153 | <i>Methylovulum</i>          |
| 0.02 | 1318 | <i>Escherichia</i>             | 0.00 | 325 | <i>Candidatus Methylomirabilis</i> | 0.00 | 153 | <i>Marininema</i>            |
| 0.02 | 1302 | <i>Moorella</i>                | 0.00 | 324 | <i>Oceanospirillum</i>             | 0.00 | 153 | <i>Ruthenibacterium</i>      |
| 0.02 | 1301 | <i>Sterolibacterium</i>        | 0.00 | 323 | <i>Haloferax</i>                   | 0.00 | 153 | <i>Ndongobacter</i>          |
| 0.02 | 1301 | <i>Anaerocolumna</i>           | 0.00 | 323 | <i>Hydrocarboniphaga</i>           | 0.00 | 153 | <i>Phoenicibacter</i>        |
| 0.02 | 1296 | <i>Sideroxydans</i>            | 0.00 | 323 | <i>Sedimenticola</i>               | 0.00 | 152 | <i>Lentinula</i>             |
| 0.02 | 1284 | <i>Gemmatimonas</i>            | 0.00 | 323 | <i>Sinomonas</i>                   | 0.00 | 152 | <i>Fron dih abitans</i>      |

|      |      |                                   |      |     |                               |      |     |                          |
|------|------|-----------------------------------|------|-----|-------------------------------|------|-----|--------------------------|
| 0.02 | 1279 | <i>Geotoga</i>                    | 0.00 | 322 | <i>Parasporobacterium</i>     | 0.00 | 152 | <i>Lepidopterella</i>    |
| 0.02 | 1273 | <i>Pseudogymnoascus</i>           | 0.00 | 321 | <i>Chryseolinea</i>           | 0.00 | 152 | <i>Rudaea</i>            |
| 0.02 | 1269 | <i>Tyzzerella</i>                 | 0.00 | 320 | <i>Arthrotrys</i>             | 0.00 | 152 | <i>Oceanibacterium</i>   |
| 0.02 | 1249 | <i>Methanofollis</i>              | 0.00 | 319 | <i>Sporolactobacillus</i>     | 0.00 | 152 | <i>Pseudarthrobacter</i> |
| 0.02 | 1245 | <i>Singulisphaera</i>             | 0.00 | 319 | <i>Sphaerobolus</i>           | 0.00 | 151 | <i>Coccidioides</i>      |
| 0.02 | 1239 | <i>Exophiala</i>                  | 0.00 | 319 | <i>Cetobacterium</i>          | 0.00 | 151 | <i>Salinivibrio</i>      |
| 0.02 | 1232 | <i>Chlorobium</i>                 | 0.00 | 319 | <i>Auxenochlorella</i>        | 0.00 | 151 | <i>Aliifodinibius</i>    |
| 0.02 | 1228 | <i>Myxococcus</i>                 | 0.00 | 318 | <i>Mycena</i>                 | 0.00 | 151 | <i>Xanthophyllomyces</i> |
| 0.02 | 1221 | <i>Sediminispirochaeta</i>        | 0.00 | 318 | <i>Methylosarcina</i>         | 0.00 | 150 | <i>Pycnopus</i>          |
| 0.02 | 1219 | <i>Oxalobacter</i>                | 0.00 | 318 | <i>Methylocapsa</i>           | 0.00 | 150 | <i>Rhodoplanes</i>       |
| 0.02 | 1215 | <i>Methylovorus</i>               | 0.00 | 318 | <i>Candidatus Soleaferrea</i> | 0.00 | 150 | <i>Hebeloma</i>          |
| 0.02 | 1204 | <i>Solimonas</i>                  | 0.00 | 318 | <i>Gemmatirosa</i>            | 0.00 | 150 | <i>Thermobacillus</i>    |
| 0.02 | 1202 | <i>Methanohalophilus</i>          | 0.00 | 317 | <i>Nitrobacter</i>            | 0.00 | 150 | <i>Serpula</i>           |
| 0.02 | 1200 | <i>Streptacidiphilus</i>          | 0.00 | 317 | <i>Williamsia</i>             | 0.00 | 150 | <i>Oceanithermus</i>     |
| 0.02 | 1192 | <i>Candidatus Marispirochaeta</i> | 0.00 | 317 | <i>Oligella</i>               | 0.00 | 150 | <i>Thalassotalea</i>     |
| 0.02 | 1191 | <i>Trypanosoma</i>                | 0.00 | 317 | <i>Acetoanaerobium</i>        | 0.00 | 149 | <i>Sporidiobolus</i>     |
| 0.02 | 1187 | <i>Solobacterium</i>              | 0.00 | 316 | <i>Acidocella</i>             | 0.00 | 149 | <i>Verrucosipora</i>     |
| 0.02 | 1180 | <i>Ignavibacterium</i>            | 0.00 | 315 | <i>Xenophilus</i>             | 0.00 | 149 | <i>Thermosinus</i>       |
| 0.02 | 1171 | <i>Methanococcoides</i>           | 0.00 | 315 | <i>Verminephrobacter</i>      | 0.00 | 149 | <i>Pseudopedobacter</i>  |
| 0.02 | 1158 | <i>Pantoea</i>                    | 0.00 | 315 | <i>Desulfovirgula</i>         | 0.00 | 149 | <i>Rodentibacter</i>     |
| 0.02 | 1154 | <i>Methanococcus</i>              | 0.00 | 315 | <i>Mangrovimonas</i>          | 0.00 | 148 | <i>Flectobacillus</i>    |
| 0.02 | 1153 | <i>Sporanaerobacter</i>           | 0.00 | 314 | <i>Chaetomium</i>             | 0.00 | 148 | <i>Kineococcus</i>       |
| 0.02 | 1150 | <i>Pseudoxanthomonas</i>          | 0.00 | 313 | <i>Formosa</i>                | 0.00 | 148 | <i>Malonomonas</i>       |
| 0.02 | 1149 | <i>Thermanaerotherix</i>          | 0.00 | 312 | <i>Glaciecola</i>             | 0.00 | 148 | <i>Oceanicaulis</i>      |
| 0.02 | 1144 | <i>Curtobacterium</i>             | 0.00 | 312 | <i>Reichenbachiella</i>       | 0.00 | 147 | <i>Weeksella</i>         |
| 0.02 | 1143 | <i>Fretibacterium</i>             | 0.00 | 312 | <i>Actinotalea</i>            | 0.00 | 147 | <i>Pelistega</i>         |
| 0.02 | 1140 | <i>Marinobacterium</i>            | 0.00 | 312 | <i>Maledivibacter</i>         | 0.00 | 147 | <i>Dactylellina</i>      |
| 0.02 | 1133 | <i>Symbiodinium</i>               | 0.00 | 312 | <i>Raineyella</i>             | 0.00 | 147 | <i>Melaminivora</i>      |
| 0.02 | 1127 | <i>Xanthobacter</i>               | 0.00 | 311 | <i>Trichomonas</i>            | 0.00 | 147 | <i>Rubeoparvulum</i>     |
| 0.02 | 1123 | <i>Methylobacter</i>              | 0.00 | 311 | <i>Marmoricola</i>            | 0.00 | 146 | <i>Maricaulis</i>        |
| 0.02 | 1121 | <i>Capnocytophaga</i>             | 0.00 | 311 | <i>Candidimonas</i>           | 0.00 | 146 | <i>Terracidiphilus</i>   |
| 0.02 | 1117 | <i>Leifsonia</i>                  | 0.00 | 311 | <i>Anaerosalibacter</i>       | 0.00 | 146 | <i>Methylobrevis</i>     |
| 0.02 | 1115 | <i>Rhizobacter</i>                | 0.00 | 310 | <i>Entamoeba</i>              | 0.00 | 146 | <i>Merdibacter</i>       |
| 0.02 | 1113 | <i>Pontibacter</i>                | 0.00 | 310 | <i>Hypholoma</i>              | 0.00 | 145 | <i>Brucella</i>          |
| 0.02 | 1109 | <i>Klebsiella</i>                 | 0.00 | 310 | <i>Fodinicurvata</i>          | 0.00 | 145 | <i>Rhynchosporium</i>    |
| 0.02 | 1107 | <i>Paludibacterium</i>            | 0.00 | 309 | <i>Pyrobaculum</i>            | 0.00 | 145 | <i>Halobacteroides</i>   |

|      |      |                         |      |     |                               |      |     |                                 |
|------|------|-------------------------|------|-----|-------------------------------|------|-----|---------------------------------|
| 0.02 | 1107 | <i>Acidihalobacter</i>  | 0.00 | 309 | <i>Corallocooccus</i>         | 0.00 | 145 | <i>Eutypa</i>                   |
| 0.02 | 1100 | <i>Phaeospirillum</i>   | 0.00 | 309 | <i>Hylemonella</i>            | 0.00 | 145 | <i>Haloterrigena</i>            |
| 0.01 | 1092 | <i>Tessaracoccus</i>    | 0.00 | 308 | <i>Persicobacter</i>          | 0.00 | 145 | <i>Dacryopinax</i>              |
| 0.01 | 1088 | <i>Halanaerobium</i>    | 0.00 | 308 | <i>Leeuwenhoekella</i>        | 0.00 | 145 | <i>Magnaporthe</i>              |
| 0.01 | 1086 | <i>Leeia</i>            | 0.00 | 308 | <i>Candidatus Omnitrophus</i> | 0.00 | 145 | <i>Jeotgalibaca</i>             |
| 0.01 | 1085 | <i>Prolixibacter</i>    | 0.00 | 307 | <i>Tsakamurella</i>           | 0.00 | 144 | <i>Chondrus</i>                 |
| 0.01 | 1083 | <i>Cohnella</i>         | 0.00 | 307 | <i>Pontibacillus</i>          | 0.00 | 144 | <i>Schizosaccharomyces</i>      |
| 0.01 | 1073 | <i>Caldithrix</i>       | 0.00 | 306 | <i>Parvularcula</i>           | 0.00 | 144 | <i>Histoplasma</i>              |
| 0.01 | 1073 | <i>Draconibacterium</i> | 0.00 | 306 | <i>Dethiosulfatibacter</i>    | 0.00 | 144 | <i>Leucoagaricus</i>            |
| 0.01 | 1071 | <i>Dictyostelium</i>    | 0.00 | 305 | <i>Alcaligenes</i>            | 0.00 | 144 | <i>Gloeocapsa</i>               |
| 0.01 | 1070 | <i>Fibrobacter</i>      | 0.00 | 305 | <i>Catenaria</i>              | 0.00 | 144 | <i>Zunongwangia</i>             |
| 0.01 | 1063 | <i>Fervidobacterium</i> | 0.00 | 305 | <i>Anoxybacillus</i>          | 0.00 | 144 | <i>Fervidicola</i>              |
| 0.01 | 1061 | <i>Thermosipho</i>      | 0.00 | 304 | <i>Vitreoscilla</i>           | 0.00 | 144 | <i>Tepidibacillus</i>           |
| 0.01 | 1055 | <i>Desulfonatronum</i>  | 0.00 | 304 | <i>Orenia</i>                 | 0.00 | 144 | <i>Candidatus Altiaarchaeum</i> |
| 0.01 | 1055 | <i>Alkaliphilus</i>     | 0.00 | 304 | <i>Hyalangium</i>             | 0.00 | 143 | <i>Thielavia</i>                |
| 0.01 | 1053 | <i>Petrotoga</i>        | 0.00 | 304 | <i>Provencibacterium</i>      | 0.00 | 143 | <i>Neolentinus</i>              |
| 0.01 | 1049 | <i>Cryptobacterium</i>  | 0.00 | 303 | <i>Cytophaga</i>              | 0.00 | 143 | <i>Promicromonospora</i>        |
| 0.01 | 1047 | <i>Gordonibacter</i>    | 0.00 | 302 | <i>Beijerinckia</i>           | 0.00 | 143 | <i>Yangia</i>                   |
| 0.01 | 1046 | <i>Pedosphaera</i>      | 0.00 | 302 | <i>Micrococcus</i>            | 0.00 | 143 | <i>Elioraea</i>                 |
| 0.01 | 1038 | <i>Peptoniphilus</i>    | 0.00 | 302 | <i>Sporisorium</i>            | 0.00 | 143 | <i>Glonium</i>                  |
| 0.01 | 1038 | <i>Aureimonas</i>       | 0.00 | 302 | <i>Lentibacillus</i>          | 0.00 | 143 | <i>Nafulsella</i>               |
| 0.01 | 1037 | <i>Thiorhodococcus</i>  | 0.00 | 302 | <i>Gramella</i>               | 0.00 | 142 | <i>Kluyvera</i>                 |
| 0.01 | 1032 | <i>Lysinibacillus</i>   | 0.00 | 301 | <i>Vulgatibacter</i>          | 0.00 | 142 | <i>Zobellia</i>                 |
| 0.01 | 1029 | <i>Erwinia</i>          | 0.00 | 301 | <i>Desnuesiella</i>           | 0.00 | 142 | <i>Tateyamaia</i>               |
| 0.01 | 1025 | <i>Planctomyces</i>     | 0.00 | 299 | <i>Anthracoecystis</i>        | 0.00 | 142 | <i>Chelativorans</i>            |
| 0.01 | 1025 | <i>Blastopirellula</i>  | 0.00 | 298 | <i>Prosthecochloris</i>       | 0.00 | 142 | <i>Niveispirillum</i>           |
| 0.01 | 1023 | <i>Caballeronia</i>     | 0.00 | 298 | <i>Acidisphaera</i>           | 0.00 | 141 | <i>Haloarcula</i>               |
| 0.01 | 1015 | <i>Serratia</i>         | 0.00 | 298 | <i>Monosiga</i>               | 0.00 | 141 | <i>Acidianus</i>                |
| 0.01 | 1015 | <i>Archaeoglobus</i>    | 0.00 | 297 | <i>Anaerobranca</i>           | 0.00 | 141 | <i>Acetitomaculum</i>           |
| 0.01 | 1015 | <i>Desulfosarcina</i>   | 0.00 | 297 | <i>Chloroherpeton</i>         | 0.00 | 141 | <i>Bathycoccus</i>              |
| 0.01 | 1013 | <i>Odoribacter</i>      | 0.00 | 296 | <i>Citrobacter</i>            | 0.00 | 141 | <i>Bryocella</i>                |
| 0.01 | 1012 | <i>Ardenticatena</i>    | 0.00 | 296 | <i>Agrococcus</i>             | 0.00 | 141 | <i>Cecembia</i>                 |
| 0.01 | 1008 | <i>Butyricimonas</i>    | 0.00 | 296 | <i>Moesziomyces</i>           | 0.00 | 141 | <i>Chitinivibrio</i>            |
| 0.01 | 1007 | <i>Thermus</i>          | 0.00 | 296 | <i>Alkalibacterium</i>        | 0.00 | 141 | <i>Thermorudis</i>              |
| 0.01 | 1006 | <i>Methylocaldum</i>    | 0.00 | 295 | <i>Halothermothrix</i>        | 0.00 | 140 | <i>Melanopsichium</i>           |
| 0.01 | 1004 | <i>Oribacterium</i>     | 0.00 | 295 | <i>Stachybotrys</i>           | 0.00 | 140 | <i>Magnetococcus</i>            |



|      |      |                            |      |     |                                 |      |     |                             |
|------|------|----------------------------|------|-----|---------------------------------|------|-----|-----------------------------|
| 0.01 | 1003 | <i>Chloroflexus</i>        | 0.00 | 295 | <i>Anaeromusa</i>               | 0.00 | 140 | <i>Garciella</i>            |
| 0.01 | 1000 | <i>Gallionella</i>         | 0.00 | 295 | <i>Sulfurifustis</i>            | 0.00 | 140 | <i>Henriciella</i>          |
| 0.01 | 995  | <i>Mariniphaga</i>         | 0.00 | 294 | <i>Scedosporium</i>             | 0.00 | 139 | <i>Thermofilum</i>          |
| 0.01 | 994  | <i>Halothiobacillus</i>    | 0.00 | 292 | <i>Nitrincola</i>               | 0.00 | 139 | <i>Tolypocladium</i>        |
| 0.01 | 988  | <i>Propionibacterium</i>   | 0.00 | 291 | <i>Candidatus Nitrosoglobus</i> | 0.00 | 139 | <i>Soonwooa</i>             |
| 0.01 | 974  | <i>Pelosinus</i>           | 0.00 | 290 | <i>Marichromatium</i>           | 0.00 | 139 | <i>Sanguangporus</i>        |
| 0.01 | 972  | <i>Thermodesulfovibrio</i> | 0.00 | 290 | <i>Methanothermococcus</i>      | 0.00 | 139 | <i>Nannizzia</i>            |
| 0.01 | 971  | <i>Toxoplasma</i>          | 0.00 | 290 | <i>Niameybacter</i>             | 0.00 | 139 | <i>Lacunisphaera</i>        |
| 0.01 | 970  | <i>Chitinilyticum</i>      | 0.00 | 289 | <i>Spiroplasma</i>              | 0.00 | 138 | <i>Saprospira</i>           |
| 0.01 | 965  | <i>Dethiosulfatarculus</i> | 0.00 | 289 | <i>Pisolithus</i>               | 0.00 | 138 | <i>Gregarina</i>            |
| 0.01 | 957  | <i>Ottowia</i>             | 0.00 | 289 | <i>Thermocrinis</i>             | 0.00 | 138 | <i>Thalassomonas</i>        |
| 0.01 | 952  | <i>Enterobacter</i>        | 0.00 | 288 | <i>Tulasnella</i>               | 0.00 | 138 | <i>Candidatus Marithrix</i> |
| 0.01 | 952  | <i>Caloramator</i>         | 0.00 | 288 | <i>Oscillochloris</i>           | 0.00 | 138 | <i>Pseudohongiella</i>      |
| 0.01 | 952  | <i>Microbulbifer</i>       | 0.00 | 287 | <i>Xylella</i>                  | 0.00 | 138 | <i>Faecalibaculum</i>       |
| 0.01 | 950  | <i>Kocuria</i>             | 0.00 | 287 | <i>Nitrospina</i>               | 0.00 | 138 | <i>Pseudomassariella</i>    |
| 0.01 | 949  | <i>Microvirga</i>          | 0.00 | 287 | <i>Alkallimnicola</i>           | 0.00 | 137 | <i>Wolinella</i>            |
| 0.01 | 948  | <i>Leishmania</i>          | 0.00 | 287 | <i>Tistrella</i>                | 0.00 | 137 | <i>Sebaldella</i>           |
| 0.01 | 948  | <i>Methanocaldococcus</i>  | 0.00 | 287 | <i>Lentisphaera</i>             | 0.00 | 137 | <i>Blattabacterium</i>      |
| 0.01 | 942  | <i>Sinorhizobium</i>       | 0.00 | 287 | <i>Methyloglobulus</i>          | 0.00 | 137 | <i>Gulosibacter</i>         |
| 0.01 | 939  | <i>Proteiniphilum</i>      | 0.00 | 287 | <i>Magnetofaba</i>              | 0.00 | 137 | <i>Roseisalinus</i>         |
| 0.01 | 938  | <i>Alcanivorax</i>         | 0.00 | 286 | <i>Dactylosporangium</i>        | 0.00 | 137 | <i>Mobilicoccus</i>         |
| 0.01 | 935  | <i>Laribacter</i>          | 0.00 | 285 | <i>Sarcina</i>                  | 0.00 | 137 | <i>Kallipyga</i>            |
| 0.01 | 934  | <i>Rhodotorula</i>         | 0.00 | 285 | <i>Coccomyxa</i>                | 0.00 | 136 | <i>Penicillioopsis</i>      |
| 0.01 | 929  | <i>Desulfatirhabdium</i>   | 0.00 | 285 | <i>Aciduliprofundum</i>         | 0.00 | 136 | <i>Labrys</i>               |
| 0.01 | 927  | <i>Sulfurospirillum</i>    | 0.00 | 285 | <i>Chitinispirillum</i>         | 0.00 | 136 | <i>Amphritea</i>            |
| 0.01 | 920  | <i>Pseudothermotoga</i>    | 0.00 | 284 | <i>Mitsuokella</i>              | 0.00 | 136 | <i>Vermiphilus</i>          |
| 0.01 | 916  | <i>Roseiflexus</i>         | 0.00 | 284 | <i>Echinicola</i>               | 0.00 | 135 | <i>Acidimicrobium</i>       |
| 0.01 | 912  | <i>Macellibacteroides</i>  | 0.00 | 284 | <i>Thermoflexibacter</i>        | 0.00 | 135 | <i>Filomicrobium</i>        |
| 0.01 | 911  | <i>Saccharothrix</i>       | 0.00 | 283 | <i>Pseudoramibacter</i>         | 0.00 | 135 | <i>Ornithinimicrobium</i>   |
| 0.01 | 910  | <i>Azohydromonas</i>       | 0.00 | 283 | <i>Albimonas</i>                | 0.00 | 135 | <i>Finegoldia</i>           |
| 0.01 | 908  | <i>Desulfomicrobium</i>    | 0.00 | 282 | <i>Actinopolyspora</i>          | 0.00 | 135 | <i>Pseudozobellia</i>       |
| 0.01 | 904  | <i>Acetanaerobacterium</i> | 0.00 | 282 | <i>Fibularhizoctonia</i>        | 0.00 | 135 | <i>Salisaeta</i>            |
| 0.01 | 901  | <i>Cellvibrio</i>          | 0.00 | 281 | <i>Nitratifractor</i>           | 0.00 | 135 | <i>Fibrisoma</i>            |
| 0.01 | 899  | <i>Dehalogenimonas</i>     | 0.00 | 281 | <i>Salinicola</i>               | 0.00 | 134 | <i>Mobiluncus</i>           |
| 0.01 | 896  | <i>Aquimarina</i>          | 0.00 | 280 | <i>Photorhabdus</i>             | 0.00 | 134 | <i>Termitomyces</i>         |
| 0.01 | 894  | <i>Pelomonas</i>           | 0.00 | 280 | <i>Ostreococcus</i>             | 0.00 | 134 | <i>Anaeroglobus</i>         |

|      |     |                                     |      |     |                                |      |     |                                 |
|------|-----|-------------------------------------|------|-----|--------------------------------|------|-----|---------------------------------|
| 0.01 | 893 | <i>Gulbenkiania</i>                 | 0.00 | 280 | <i>Steroidobacter</i>          | 0.00 | 134 | <i>Hydrogenivirga</i>           |
| 0.01 | 888 | <i>Candidatus Brocadia</i>          | 0.00 | 280 | <i>Anaerosporebacter</i>       | 0.00 | 134 | <i>Nitrosopumilus</i>           |
| 0.01 | 881 | <i>Methanolacinia</i>               | 0.00 | 279 | <i>Stereum</i>                 | 0.00 | 133 | <i>Piscirickettsia</i>          |
| 0.01 | 875 | <i>Chlamydia</i>                    | 0.00 | 278 | <i>Tetrahymena</i>             | 0.00 | 133 | <i>Couchioplanes</i>            |
| 0.01 | 875 | <i>Methanosphaerula</i>             | 0.00 | 278 | <i>Fulvivirga</i>              | 0.00 | 133 | <i>Alishewanella</i>            |
| 0.01 | 870 | <i>Desulfarculus</i>                | 0.00 | 277 | <i>Xylophilus</i>              | 0.00 | 133 | <i>Crenothrix</i>               |
| 0.01 | 864 | <i>Acholeplasma</i>                 | 0.00 | 275 | <i>Caenimonas</i>              | 0.00 | 133 | <i>Ectothiorhodosinus</i>       |
| 0.01 | 862 | <i>Dorea</i>                        | 0.00 | 275 | <i>Komagataeibacter</i>        | 0.00 | 133 | <i>Aestuariibacter</i>          |
| 0.01 | 854 | <i>Geothrix</i>                     | 0.00 | 274 | <i>Moritella</i>               | 0.00 | 133 | <i>Gracilimonas</i>             |
| 0.01 | 854 | <i>Hungatella</i>                   | 0.00 | 274 | <i>Candidatus Pelagibacter</i> | 0.00 | 133 | <i>Candidatus Saccharimonas</i> |
| 0.01 | 851 | <i>Candidatus Solibacter</i>        | 0.00 | 274 | <i>Pleomorphomonas</i>         | 0.00 | 133 | <i>Bernardetia</i>              |
| 0.01 | 845 | <i>Erythrobacter</i>                | 0.00 | 274 | <i>Dethiobacter</i>            | 0.00 | 132 | <i>Hirsutella</i>               |
| 0.01 | 844 | <i>Salinispora</i>                  | 0.00 | 274 | <i>Thermogemmatispora</i>      | 0.00 | 132 | <i>Aliiglaciecola</i>           |
| 0.01 | 844 | <i>Desulfatiglans</i>               | 0.00 | 273 | <i>Valsa</i>                   | 0.00 | 131 | <i>Leptosphaeria</i>            |
| 0.01 | 843 | <i>Beggiatoa</i>                    | 0.00 | 273 | <i>Pseudoceanicola</i>         | 0.00 | 131 | <i>Pyrenophora</i>              |
| 0.01 | 840 | <i>Coprococcus</i>                  | 0.00 | 272 | <i>Theileria</i>               | 0.00 | 131 | <i>Claviceps</i>                |
| 0.01 | 835 | <i>Melioribacter</i>                | 0.00 | 272 | <i>Thermobaculum</i>           | 0.00 | 131 | <i>Nitrococcus</i>              |
| 0.01 | 833 | <i>Thermosyntropha</i>              | 0.00 | 271 | <i>Ammonifex</i>               | 0.00 | 131 | <i>Haloplasma</i>               |
| 0.01 | 833 | <i>Formivibrio</i>                  | 0.00 | 271 | <i>Coprinopsis</i>             | 0.00 | 131 | <i>Mariniradius</i>             |
| 0.01 | 833 | <i>Ktedonobacter</i>                | 0.00 | 271 | <i>Geoglobus</i>               | 0.00 | 131 | <i>Moheibacter</i>              |
| 0.01 | 832 | <i>Phytophthora</i>                 | 0.00 | 271 | <i>Leisingera</i>              | 0.00 | 130 | <i>Bysochlamys</i>              |
| 0.01 | 831 | <i>Veillonella</i>                  | 0.00 | 271 | <i>Coraliomargarita</i>        | 0.00 | 130 | <i>Phanerochaete</i>            |
| 0.01 | 831 | <i>Thalassiosira</i>                | 0.00 | 271 | <i>Candidatus Symbiobacter</i> | 0.00 | 130 | <i>Planobispora</i>             |
| 0.01 | 825 | <i>Candidatus Syntrophoarchaeum</i> | 0.00 | 271 | <i>Mesoaciditoga</i>           | 0.00 | 130 | <i>Borrelia</i>                 |
| 0.01 | 824 | <i>Roseovarius</i>                  | 0.00 | 271 | <i>Pyrinomonas</i>             | 0.00 | 130 | <i>Glarea</i>                   |
| 0.01 | 821 | <i>Sutterella</i>                   | 0.00 | 270 | <i>Nannocystis</i>             | 0.00 | 130 | <i>Escovopsis</i>               |
| 0.01 | 817 | <i>Alteromonas</i>                  | 0.00 | 270 | <i>Thermomonas</i>             | 0.00 | 130 | <i>Eisenibacter</i>             |
| 0.01 | 810 | <i>Emiliana</i>                     | 0.00 | 270 | <i>Moniliophthora</i>          | 0.00 | 129 | <i>Halomicrobium</i>            |
| 0.01 | 808 | <i>Gemmata</i>                      | 0.00 | 269 | <i>Lyngbya</i>                 | 0.00 | 129 | <i>Marinimicrobium</i>          |
| 0.01 | 807 | <i>Propionicicella</i>              | 0.00 | 269 | <i>Fragilariopsis</i>          | 0.00 | 129 | <i>Elstera</i>                  |
| 0.01 | 803 | <i>Loktanella</i>                   | 0.00 | 269 | <i>Parafilimonas</i>           | 0.00 | 128 | <i>Pasteurella</i>              |
| 0.01 | 802 | <i>Holdemania</i>                   | 0.00 | 268 | <i>Raoultella</i>              | 0.00 | 128 | <i>Perkinsus</i>                |
| 0.01 | 800 | <i>Aromatoleum</i>                  | 0.00 | 268 | <i>Leadbetterella</i>          | 0.00 | 128 | <i>Lipomyces</i>                |
| 0.01 | 793 | <i>Aneurinibacillus</i>             | 0.00 | 268 | <i>Lactonifactor</i>           | 0.00 | 128 | <i>Streptobacillus</i>          |

|      |     |                                |      |     |                                |      |     |                                |
|------|-----|--------------------------------|------|-----|--------------------------------|------|-----|--------------------------------|
| 0.01 | 793 | <i>Ferrovum</i>                | 0.00 | 267 | <i>Galerina</i>                | 0.00 | 128 | <i>Scleroderma</i>             |
| 0.01 | 793 | <i>Kwoniella</i>               | 0.00 | 267 | <i>Endocarpon</i>              | 0.00 | 128 | <i>Roseibacterium</i>          |
| 0.01 | 790 | <i>Jonquetella</i>             | 0.00 | 267 | <i>Siphonobacter</i>           | 0.00 | 128 | <i>Candidatus Amoebophilus</i> |
| 0.01 | 790 | <i>Labrenzia</i>               | 0.00 | 267 | <i>Phormidesmis</i>            | 0.00 | 128 | <i>Haematobacter</i>           |
| 0.01 | 787 | <i>Puccinia</i>                | 0.00 | 266 | <i>Spirulina</i>               | 0.00 | 128 | <i>Mastigocoleus</i>           |
| 0.01 | 786 | <i>Epulopiscium</i>            | 0.00 | 266 | <i>Winogradskyella</i>         | 0.00 | 128 | <i>Candidatus Berkiella</i>    |
| 0.01 | 784 | <i>Holophaga</i>               | 0.00 | 266 | <i>Kushneria</i>               | 0.00 | 127 | <i>Lawsonia</i>                |
| 0.01 | 783 | <i>Methylomicrobium</i>        | 0.00 | 265 | <i>Roseobacter</i>             | 0.00 | 127 | <i>Rosellinia</i>              |
| 0.01 | 774 | <i>Thalassospira</i>           | 0.00 | 265 | <i>Hortaea</i>                 | 0.00 | 127 | <i>Selenihalanaerobacter</i>   |
| 0.01 | 774 | <i>Amantichitinum</i>          | 0.00 | 265 | <i>Spongiibacter</i>           | 0.00 | 127 | <i>Mesonia</i>                 |
| 0.01 | 771 | <i>Sporothrix</i>              | 0.00 | 264 | <i>Hypoxylon</i>               | 0.00 | 126 | <i>Ureaplasma</i>              |
| 0.01 | 771 | <i>Niabella</i>                | 0.00 | 264 | <i>Denitrovibrio</i>           | 0.00 | 126 | <i>Sphaerotilus</i>            |
| 0.01 | 768 | <i>Paraprevotella</i>          | 0.00 | 264 | <i>Plicaturopsis</i>           | 0.00 | 126 | <i>Oidiodendron</i>            |
| 0.01 | 767 | <i>Jeongeupia</i>              | 0.00 | 264 | <i>Varibaculum</i>             | 0.00 | 126 | <i>Haliea</i>                  |
| 0.01 | 763 | <i>Desulfitibacter</i>         | 0.00 | 263 | <i>Paucibacter</i>             | 0.00 | 126 | <i>Monashia</i>                |
| 0.01 | 761 | <i>Candidatus Scalindua</i>    | 0.00 | 263 | <i>Reyranella</i>              | 0.00 | 126 | <i>Oblitimonas</i>             |
| 0.01 | 759 | <i>Marinomonas</i>             | 0.00 | 263 | <i>Rubinisphaera</i>           | 0.00 | 125 | <i>Helcococcus</i>             |
| 0.01 | 758 | <i>Cellulosilyticum</i>        | 0.00 | 261 | <i>Erysipelothrix</i>          | 0.00 | 125 | <i>Botrytis</i>                |
| 0.01 | 752 | <i>Thermithiobacillus</i>      | 0.00 | 261 | <i>Sphaerobacter</i>           | 0.00 | 125 | <i>Halonatronum</i>            |
| 0.01 | 752 | <i>Celeribacter</i>            | 0.00 | 261 | <i>Candidatus Kapabacteria</i> | 0.00 | 125 | <i>Vulcanibacillus</i>         |
| 0.01 | 745 | <i>Anaerophaga</i>             | 0.00 | 260 | <i>Haloferula</i>              | 0.00 | 125 | <i>Ruania</i>                  |
| 0.01 | 743 | <i>Flavonifactor</i>           | 0.00 | 259 | <i>Halococcus</i>              | 0.00 | 125 | <i>Krasilnikoviella</i>        |
| 0.01 | 742 | <i>Nitrosovibrio</i>           | 0.00 | 259 | <i>Nitrolancea</i>             | 0.00 | 124 | <i>Fistulina</i>               |
| 0.01 | 740 | <i>Brachyspira</i>             | 0.00 | 258 | <i>Paraphaeosphaeria</i>       | 0.00 | 124 | <i>Thielaviopsis</i>           |
| 0.01 | 738 | <i>Acidipropionibacterium</i>  | 0.00 | 258 | <i>Citreicella</i>             | 0.00 | 124 | <i>Kazachstania</i>            |
| 0.01 | 737 | <i>Acetivibrio</i>             | 0.00 | 257 | <i>Synechocystis</i>           | 0.00 | 124 | <i>Xylona</i>                  |
| 0.01 | 734 | <i>Candidatus Moduliflexus</i> | 0.00 | 257 | <i>Methylohalobius</i>         | 0.00 | 124 | <i>Kalmanozyma</i>             |
| 0.01 | 733 | <i>Talaromyces</i>             | 0.00 | 257 | <i>Fibrella</i>                | 0.00 | 124 | <i>Parageobacillus</i>         |
| 0.01 | 733 | <i>Thermodesulforhabdus</i>    | 0.00 | 257 | <i>Mailhella</i>               | 0.00 | 123 | <i>Streptoalloteichus</i>      |
| 0.01 | 728 | <i>Clostridioides</i>          | 0.00 | 256 | <i>Diaporthe</i>               | 0.00 | 123 | <i>Natronobacterium</i>        |
| 0.01 | 727 | <i>Chloracidobacterium</i>     | 0.00 | 255 | <i>Francisella</i>             | 0.00 | 123 | <i>Gardnerella</i>             |
| 0.01 | 719 | <i>Dyella</i>                  | 0.00 | 255 | <i>Microscilla</i>             | 0.00 | 123 | <i>Dichomitus</i>              |
| 0.01 | 719 | <i>Parapedobacter</i>          | 0.00 | 255 | <i>Thermoplasma</i>            | 0.00 | 123 | <i>Segniliparus</i>            |
| 0.01 | 718 | <i>Runella</i>                 | 0.00 | 255 | <i>Desulfocapsa</i>            | 0.00 | 123 | <i>Caldimicrobium</i>          |
| 0.01 | 718 | <i>Rhizoctonia</i>             | 0.00 | 255 | <i>Turicibacter</i>            | 0.00 | 123 | <i>Indibacter</i>              |
| 0.01 | 715 | <i>Saccharomonospora</i>       | 0.00 | 255 | <i>Gilvamarinus</i>            | 0.00 | 122 | <i>Wolbachia</i>               |

|      |     |                           |      |     |                                |      |     |                                  |
|------|-----|---------------------------|------|-----|--------------------------------|------|-----|----------------------------------|
| 0.01 | 713 | <i>Tolumonas</i>          | 0.00 | 255 | <i>Dissulfuribacter</i>        | 0.00 | 122 | <i>Flexistipes</i>               |
| 0.01 | 712 | <i>Methylosinus</i>       | 0.00 | 255 | <i>Acidibacillus</i>           | 0.00 | 122 | <i>Sordaria</i>                  |
| 0.01 | 712 | <i>Libanicoccus</i>       | 0.00 | 255 | <i>Halofilum</i>               | 0.00 | 122 | <i>Suillus</i>                   |
| 0.01 | 711 | <i>Ramlibacter</i>        | 0.00 | 254 | <i>Ancylobacter</i>            | 0.00 | 122 | <i>Saitoella</i>                 |
| 0.01 | 710 | <i>Afipia</i>             | 0.00 | 254 | <i>Rhizopus</i>                | 0.00 | 122 | <i>Metallosphaera</i>            |
| 0.01 | 709 | <i>Cyanothece</i>         | 0.00 | 254 | <i>Neurospora</i>              | 0.00 | 122 | <i>Xenococcus</i>                |
| 0.01 | 705 | <i>Rhodomicrobium</i>     | 0.00 | 254 | <i>Plesiocystis</i>            | 0.00 | 122 | <i>Stanieria</i>                 |
| 0.01 | 705 | <i>Tangfeifania</i>       | 0.00 | 254 | <i>Natranaerobius</i>          | 0.00 | 122 | <i>Mucispirillum</i>             |
| 0.01 | 697 | <i>Demequina</i>          | 0.00 | 254 | <i>Adlercreutzia</i>           | 0.00 | 122 | <i>Planifilum</i>                |
| 0.01 | 691 | <i>Niastella</i>          | 0.00 | 254 | <i>Defluviitalea</i>           | 0.00 | 122 | <i>Candidatus Azobacteroides</i> |
| 0.01 | 690 | <i>Catabacter</i>         | 0.00 | 254 | <i>Mizugakiibacter</i>         | 0.00 | 121 | <i>Phycomyces</i>                |
| 0.01 | 690 | <i>Pseudacidovorax</i>    | 0.00 | 253 | <i>Leuconostoc</i>             | 0.00 | 121 | <i>Kockovaella</i>               |
| 0.01 | 684 | <i>Caldilinea</i>         | 0.00 | 253 | <i>Alkalibacter</i>            | 0.00 | 121 | <i>Laetiporus</i>                |
| 0.01 | 681 | <i>Colwellia</i>          | 0.00 | 253 | <i>Emticicia</i>               | 0.00 | 121 | <i>Candidatus Phytoplasma</i>    |
| 0.01 | 681 | <i>Ethanoligenens</i>     | 0.00 | 253 | <i>Alloactinosynnema</i>       | 0.00 | 121 | <i>Oceanisphaera</i>             |
| 0.01 | 679 | <i>Syntrophothermus</i>   | 0.00 | 253 | <i>Desertifilum</i>            | 0.00 | 121 | <i>Ulvibacter</i>                |
| 0.01 | 677 | <i>Neospora</i>           | 0.00 | 252 | <i>Acytostelium</i>            | 0.00 | 121 | <i>Humibacillus</i>              |
| 0.01 | 676 | <i>Ectothiorhodospira</i> | 0.00 | 252 | <i>Vulcanisaeta</i>            | 0.00 | 121 | <i>Fibroporia</i>                |
| 0.01 | 676 | <i>Microbispora</i>       | 0.00 | 251 | <i>Aerococcus</i>              | 0.00 | 121 | <i>Cyberindnera</i>              |
| 0.01 | 676 | <i>Nitratireductor</i>    | 0.00 | 251 | <i>Halobacterium</i>           | 0.00 | 121 | <i>Trueperella</i>               |
| 0.01 | 676 | <i>Alloprevotella</i>     | 0.00 | 251 | <i>Trichophyton</i>            | 0.00 | 121 | <i>Allokutzneria</i>             |
| 0.01 | 674 | <i>Verrucomicrobium</i>   | 0.00 | 250 | <i>Blastochloris</i>           | 0.00 | 121 | <i>Thiolapillus</i>              |
| 0.01 | 670 | <i>Cyclobacterium</i>     | 0.00 | 250 | <i>Oceanicola</i>              | 0.00 | 121 | <i>Candidatus Chrysopegis</i>    |
| 0.01 | 669 | <i>Gonium</i>             | 0.00 | 250 | <i>Luteipulveratus</i>         | 0.00 | 120 | <i>Proteus</i>                   |
| 0.01 | 668 | <i>Salinivirga</i>        | 0.00 | 250 | <i>Marivirga</i>               | 0.00 | 120 | <i>Ascochyta</i>                 |
| 0.01 | 667 | <i>Listeria</i>           | 0.00 | 250 | <i>Erysipelatoclostridium</i>  | 0.00 | 120 | <i>Dermacoccus</i>               |
| 0.01 | 666 | <i>Desulfobacter</i>      | 0.00 | 249 | <i>Kibdelosporangium</i>       | 0.00 | 120 | <i>Maritimibacter</i>            |
| 0.01 | 665 | <i>Thiocapsa</i>          | 0.00 | 249 | <i>Coniochaeta</i>             | 0.00 | 120 | <i>Elusimicrobium</i>            |
| 0.01 | 664 | <i>Agromyces</i>          | 0.00 | 249 | <i>Tumebacillus</i>            | 0.00 | 120 | <i>Cohaesibacter</i>             |
| 0.01 | 663 | <i>Ensifer</i>            | 0.00 | 249 | <i>Candidatus Desulforudis</i> | 0.00 | 120 | <i>Tersicoccus</i>               |
| 0.01 | 660 | <i>Syntrophaceticus</i>   | 0.00 | 249 | <i>Halarsenatibacter</i>       | 0.00 | 120 | <i>Pricia</i>                    |
| 0.01 | 657 | <i>Arenimonas</i>         | 0.00 | 248 | <i>Clavibacter</i>             | 0.00 | 120 | <i>Sulfuricaulis</i>             |
| 0.01 | 656 | <i>Allomyces</i>          | 0.00 | 248 | <i>Pseudoruegeria</i>          | 0.00 | 120 | <i>Candidatus Kryptobacter</i>   |
| 0.01 | 655 | <i>Trichoderma</i>        | 0.00 | 248 | <i>Stenoxybacter</i>           | 0.00 | 119 | <i>Dothistroma</i>               |
| 0.01 | 652 | <i>Cystobacter</i>        | 0.00 | 248 | <i>Rubripirellula</i>          | 0.00 | 119 | <i>Paenalcaligenes</i>           |

|      |     |                           |      |     |                                |      |     |                          |
|------|-----|---------------------------|------|-----|--------------------------------|------|-----|--------------------------|
| 0.01 | 650 | <i>Moraxella</i>          | 0.00 | 247 | <i>Methylacidiphilum</i>       | 0.00 | 119 | <i>Lihuaxuella</i>       |
| 0.01 | 650 | <i>Monoraphidium</i>      | 0.00 | 247 | <i>Zymoseptoria</i>            | 0.00 | 119 | <i>Rhodohalobacter</i>   |
| 0.01 | 650 | <i>Janibacter</i>         | 0.00 | 247 | <i>Millionella</i>             | 0.00 | 118 | <i>Melampsora</i>        |
| 0.01 | 650 | <i>Ruegeria</i>           | 0.00 | 245 | <i>Thiomargarita</i>           | 0.00 | 118 | <i>Tuber</i>             |
| 0.01 | 648 | <i>Tilletia</i>           | 0.00 | 245 | <i>Halodesulfovibrio</i>       | 0.00 | 118 | <i>Natronomonas</i>      |
| 0.01 | 647 | <i>Labilibacter</i>       | 0.00 | 244 | <i>Piloderma</i>               | 0.00 | 118 | <i>Beutenbergia</i>      |
| 0.01 | 645 | <i>Blastococcus</i>       | 0.00 | 244 | <i>Desulfoplanes</i>           | 0.00 | 118 | <i>Epicoccum</i>         |
| 0.01 | 645 | <i>Oxobacter</i>          | 0.00 | 243 | <i>Desulfurobacterium</i>      | 0.00 | 118 | <i>Thermobrachium</i>    |
| 0.01 | 644 | <i>Chondromyces</i>       | 0.00 | 243 | <i>Mogibacterium</i>           | 0.00 | 118 | <i>Komagataella</i>      |
| 0.01 | 644 | <i>Acidiferrobacter</i>   | 0.00 | 243 | <i>Lokiarchaeum</i>            | 0.00 | 118 | <i>Thalassobaculum</i>   |
| 0.01 | 643 | <i>Kaistia</i>            | 0.00 | 242 | <i>Saccharomyces</i>           | 0.00 | 118 | <i>Alteribacillus</i>    |
| 0.01 | 643 | <i>Sulfurimonas</i>       | 0.00 | 242 | <i>Cryptosporidium</i>         | 0.00 | 117 | <i>Halopiger</i>         |
| 0.01 | 641 | <i>Volvox</i>             | 0.00 | 242 | <i>Achromatium</i>             | 0.00 | 117 | <i>Beduini</i>           |
| 0.01 | 640 | <i>Exiguobacterium</i>    | 0.00 | 242 | <i>Marinospirillum</i>         | 0.00 | 116 | <i>Piromyces</i>         |
| 0.01 | 640 | <i>Cellulosimicrobium</i> | 0.00 | 242 | <i>Balnearia</i>               | 0.00 | 116 | <i>Syncephalastrum</i>   |
| 0.01 | 639 | <i>Yersinia</i>           | 0.00 | 242 | <i>Punctularia</i>             | 0.00 | 116 | <i>Acidilobus</i>        |
| 0.01 | 639 | <i>Propionispora</i>      | 0.00 | 242 | <i>Pseudoclavibacter</i>       | 0.00 | 116 | <i>Thermobispora</i>     |
| 0.01 | 636 | <i>Tepidanaerobacter</i>  | 0.00 | 242 | <i>Filimonas</i>               | 0.00 | 116 | <i>Zooshikella</i>       |
| 0.01 | 631 | <i>Tenacibaculum</i>      | 0.00 | 242 | <i>Geminocystis</i>            | 0.00 | 116 | <i>Kineosphaera</i>      |
| 0.01 | 630 | <i>Lewinella</i>          | 0.00 | 241 | <i>Oleiphilus</i>              | 0.00 | 116 | <i>Hydrogenimonas</i>    |
| 0.01 | 630 | <i>Solirubrobacter</i>    | 0.00 | 241 | <i>Tepidibacter</i>            | 0.00 | 116 | <i>Cyphellophora</i>     |
| 0.01 | 626 | <i>Leptonema</i>          | 0.00 | 241 | <i>Candidatus Stoquefichus</i> | 0.00 | 116 | <i>Estrella</i>          |
| 0.01 | 625 | <i>Jiangella</i>          | 0.00 | 240 | <i>Phialophora</i>             | 0.00 | 116 | <i>Wickerhamomyces</i>   |
| 0.01 | 624 | <i>Aureococcus</i>        | 0.00 | 240 | <i>Sulfurihydrogenibium</i>    | 0.00 | 116 | <i>Sporolituus</i>       |
| 0.01 | 623 | <i>Geosporobacter</i>     | 0.00 | 240 | <i>Catenulispora</i>           | 0.00 | 116 | <i>Halorientalis</i>     |
| 0.01 | 622 | <i>Stigmatella</i>        | 0.00 | 239 | <i>Intrasporangium</i>         | 0.00 | 116 | <i>Pseudorhodoplanes</i> |
| 0.01 | 621 | <i>Rheinheimera</i>       | 0.00 | 239 | <i>Lichtheimia</i>             | 0.00 | 116 | <i>Criibacterium</i>     |
| 0.01 | 618 | <i>Saccharopolyspora</i>  | 0.00 | 238 | <i>Owenweeksia</i>             | 0.00 | 115 | <i>Thermocrispum</i>     |
| 0.01 | 618 | <i>Desulfofustis</i>      | 0.00 | 238 | <i>Crenotalea</i>              | 0.00 | 115 | <i>Cyanidioschyzon</i>   |
| 0.01 | 618 | <i>Desulfotignum</i>      | 0.00 | 238 | <i>Romboutsia</i>              | 0.00 | 115 | <i>Choanephora</i>       |
| 0.01 | 616 | <i>Ochrobactrum</i>       | 0.00 | 237 | <i>Microdochium</i>            | 0.00 | 115 | <i>Halorhabdus</i>       |
| 0.01 | 614 | <i>Flaviumibacter</i>     | 0.00 | 237 | <i>Thioflaviccoccus</i>        | 0.00 | 114 | <i>Peptococcus</i>       |
| 0.01 | 613 | <i>Methylophaga</i>       | 0.00 | 237 | <i>Thermosulfurimonas</i>      | 0.00 | 114 | <i>Plasmiodiophora</i>   |
| 0.01 | 611 | <i>Aquabacterium</i>      | 0.00 | 237 | <i>Nitrospirillum</i>          | 0.00 | 114 | <i>Salinibacter</i>      |
| 0.01 | 610 | <i>Sulfitobacter</i>      | 0.00 | 237 | <i>Cnuella</i>                 | 0.00 | 114 | <i>Granulibacter</i>     |
| 0.01 | 610 | <i>Pseudorhodoferax</i>   | 0.00 | 236 | <i>Pediococcus</i>             | 0.00 | 114 | <i>Hydnomerulius</i>     |

|      |     |                                    |      |     |                                 |      |     |                            |
|------|-----|------------------------------------|------|-----|---------------------------------|------|-----|----------------------------|
| 0.01 | 610 | <i>Anaeromassilibacillus</i>       | 0.00 | 236 | <i>Neptunomonas</i>             | 0.00 | 114 | <i>Actinomycetospora</i>   |
| 0.01 | 609 | <i>Endozoicomonas</i>              | 0.00 | 236 | <i>Thalassobius</i>             | 0.00 | 114 | <i>Rasamsonia</i>          |
| 0.01 | 608 | <i>Actinokineospora</i>            | 0.00 | 236 | <i>Pseudoxanthobacter</i>       | 0.00 | 114 | <i>Psychrobacillus</i>     |
| 0.01 | 608 | <i>Maribacter</i>                  | 0.00 | 236 | <i>Halovenus</i>                | 0.00 | 114 | <i>Motiliproteus</i>       |
| 0.01 | 608 | <i>Candidatus Magnetomorum</i>     | 0.00 | 236 | <i>Candidatus Kryptonium</i>    | 0.00 | 114 | <i>Colibacter</i>          |
| 0.01 | 607 | <i>Meiothermus</i>                 | 0.00 | 235 | <i>Acidobacterium</i>           | 0.00 | 113 | <i>Cardiobacterium</i>     |
| 0.01 | 607 | <i>Oceanobacillus</i>              | 0.00 | 235 | <i>Candidatus Glomeribacter</i> | 0.00 | 113 | <i>Tetragenococcus</i>     |
| 0.01 | 606 | <i>Rhodovulum</i>                  | 0.00 | 235 | <i>Anaerofustis</i>             | 0.00 | 113 | <i>Thermosynechococcus</i> |
| 0.01 | 606 | <i>Belnapia</i>                    | 0.00 | 235 | <i>Thermosulfidibacter</i>      | 0.00 | 113 | <i>Planomicrobium</i>      |
| 0.01 | 604 | <i>Aurantimonas</i>                | 0.00 | 234 | <i>Planomonospora</i>           | 0.00 | 113 | <i>Psychrilyobacter</i>    |
| 0.01 | 604 | <i>Defluviitoga</i>                | 0.00 | 233 | <i>Tistlia</i>                  | 0.00 | 113 | <i>Pleomorphobacterium</i> |
| 0.01 | 603 | <i>Brevibacterium</i>              | 0.00 | 233 | <i>Pseudarcicella</i>           | 0.00 | 113 | <i>Naematelia</i>          |
| 0.01 | 603 | <i>Noviherbaspirillum</i>          | 0.00 | 232 | <i>Rhizopogon</i>               | 0.00 | 112 | <i>Pyrodictium</i>         |
| 0.01 | 601 | <i>Trametes</i>                    | 0.00 | 232 | <i>Naegleria</i>                | 0.00 | 112 | <i>Eremothecium</i>        |
| 0.01 | 599 | <i>Microtetraspora</i>             | 0.00 | 232 | <i>Kyrpidia</i>                 | 0.00 | 112 | <i>Sporichthya</i>         |
| 0.01 | 599 | <i>Anaerobium</i>                  | 0.00 | 231 | <i>Trichodesmium</i>            | 0.00 | 112 | <i>Isaria</i>              |
| 0.01 | 598 | <i>Chitiniphilus</i>               | 0.00 | 231 | <i>Stappia</i>                  | 0.00 | 112 | <i>Succinimonas</i>        |
| 0.01 | 596 | <i>Chlorobaculum</i>               | 0.00 | 231 | <i>Inediibacterium</i>          | 0.00 | 112 | <i>Maribius</i>            |
| 0.01 | 595 | <i>Candidatus Magnetobacterium</i> | 0.00 | 230 | <i>Paramecium</i>               | 0.00 | 112 | <i>Caldanaerovirga</i>     |
| 0.01 | 595 | <i>Brachybacterium</i>             | 0.00 | 230 | <i>Geitlerinema</i>             | 0.00 | 112 | <i>Faecalicoccus</i>       |
| 0.01 | 595 | <i>Methanomassiliococcus</i>       | 0.00 | 230 | <i>Desulfurivibrio</i>          | 0.00 | 111 | <i>Ahrensia</i>            |
| 0.01 | 595 | <i>Pseudobacteroides</i>           | 0.00 | 229 | <i>Agreia</i>                   | 0.00 | 111 | <i>Moellerella</i>         |
| 0.01 | 593 | <i>Limnohabitans</i>               | 0.00 | 229 | <i>Kangiella</i>                | 0.00 | 111 | <i>Conchiformibius</i>     |
| 0.01 | 592 | <i>Rufibacter</i>                  | 0.00 | 229 | <i>Ohtaekwangia</i>             | 0.00 | 111 | <i>Wenxinia</i>            |
| 0.01 | 591 | <i>Micromonas</i>                  | 0.00 | 229 | <i>Massilimaliae</i>            | 0.00 | 111 | <i>Spiribacter</i>         |
| 0.01 | 588 | <i>Planococcus</i>                 | 0.00 | 228 | <i>Chelatococcus</i>            | 0.00 | 111 | <i>Terrimicrobium</i>      |
| 0.01 | 588 | <i>Thermodesulfatator</i>          | 0.00 | 228 | <i>Aminobacter</i>              | 0.00 | 111 | <i>Dubosiella</i>          |
| 0.01 | 588 | <i>Enterorhabdus</i>               | 0.00 | 228 | <i>Nesterenkonia</i>            | 0.00 | 110 | <i>Pseudozyma</i>          |
| 0.01 | 586 | <i>Hespellia</i>                   | 0.00 | 228 | <i>Parachlamydia</i>            | 0.00 | 110 | <i>Fulvimarina</i>         |
| 0.01 | 583 | <i>Thiomicrospira</i>              | 0.00 | 228 | <i>Mariprofundus</i>            | 0.00 | 110 | <i>Grimontia</i>           |
| 0.01 | 583 | <i>Cryptococcus</i>                | 0.00 | 228 | <i>Magnetospira</i>             | 0.00 | 110 | <i>Torrubiella</i>         |
| 0.01 | 583 | <i>Peptoclostridium</i>            | 0.00 | 228 | <i>Paeniclostridium</i>         | 0.00 | 110 | <i>Tropicibacter</i>       |
| 0.01 | 582 | <i>Limnobacter</i>                 | 0.00 | 227 | <i>Babesia</i>                  | 0.00 | 110 | <i>Oceanicoccus</i>        |
| 0.01 | 580 | <i>Geofilum</i>                    | 0.00 | 227 | <i>Cobetia</i>                  | 0.00 | 110 | <i>Candidatus Babela</i>   |
| 0.01 | 579 | <i>Elizabethkingia</i>             | 0.00 | 227 | <i>Dokdonella</i>               | 0.00 | 109 | <i>Ornithobacterium</i>    |

|      |     |                              |      |     |                            |      |     |                                    |
|------|-----|------------------------------|------|-----|----------------------------|------|-----|------------------------------------|
| 0.01 | 578 | <i>Prosthecomicrobium</i>    | 0.00 | 227 | <i>Clohesyomyces</i>       | 0.00 | 109 | <i>Daldinia</i>                    |
| 0.01 | 577 | <i>Thermoanaerobacterium</i> | 0.00 | 227 | <i>Basilea</i>             | 0.00 | 109 | <i>Streptomonospora</i>            |
| 0.01 | 574 | <i>Youngiibacter</i>         | 0.00 | 226 | <i>Acaryochloris</i>       | 0.00 | 109 | <i>Lachnobacterium</i>             |
| 0.01 | 573 | <i>Methanoplanus</i>         | 0.00 | 226 | <i>Persephonella</i>       | 0.00 | 109 | <i>Polymorphum</i>                 |
| 0.01 | 571 | <i>Sedimentibacter</i>       | 0.00 | 226 | <i>Marvinbryantia</i>      | 0.00 | 109 | <i>Murdochiella</i>                |
| 0.01 | 570 | <i>Schlesneria</i>           | 0.00 | 226 | <i>Desulfonatronospira</i> | 0.00 | 109 | <i>Parastagonospora</i>            |
| 0.01 | 567 | <i>Opiritutus</i>            | 0.00 | 225 | <i>Smittium</i>            | 0.00 | 108 | <i>Beauveria</i>                   |
| 0.01 | 563 | <i>Gluconobacter</i>         | 0.00 | 225 | <i>Labilithrix</i>         | 0.00 | 108 | <i>Sphaerulina</i>                 |
| 0.01 | 563 | <i>Patulibacter</i>          | 0.00 | 224 | <i>Isoptericola</i>        | 0.00 | 107 | <i>Plasmopara</i>                  |
| 0.01 | 561 | <i>Aeromicrobium</i>         | 0.00 | 224 | <i>Ophiocordyceps</i>      | 0.00 | 107 | <i>Leucothrix</i>                  |
| 0.01 | 561 | <i>Robinsoniella</i>         | 0.00 | 223 | <i>Fischerella</i>         | 0.00 | 107 | <i>Gelidibacter</i>                |
| 0.01 | 561 | <i>Marinifilum</i>           | 0.00 | 223 | <i>Zygosaccharomyces</i>   | 0.00 | 107 | <i>Natrinema</i>                   |
| 0.01 | 560 | <i>Bdellovibrio</i>          | 0.00 | 223 | <i>Salinimicrobium</i>     | 0.00 | 107 | <i>Asaia</i>                       |
| 0.01 | 559 | <i>Thermoanaerobacter</i>    | 0.00 | 223 | <i>Thermotalea</i>         | 0.00 | 107 | <i>Halomicronema</i>               |
| 0.01 | 559 | <i>Luteimonas</i>            | 0.00 | 222 | <i>Lachnospira</i>         | 0.00 | 107 | <i>Robiginitalea</i>               |
| 0.01 | 558 | <i>Methanomethylovorans</i>  | 0.00 | 222 | <i>Capronia</i>            | 0.00 | 107 | <i>Viridibacillus</i>              |
| 0.01 | 558 | <i>Dendrosporobacter</i>     | 0.00 | 222 | <i>Nitratiruptor</i>       | 0.00 | 107 | <i>Polycyclovorans</i>             |
| 0.01 | 557 | <i>Halolamina</i>            | 0.00 | 222 | <i>Cronobacter</i>         | 0.00 | 107 | <i>Candidatus<br/>Acetothermum</i> |
| 0.01 | 555 | <i>Mitsuaria</i>             | 0.00 | 222 | <i>Neorhizobium</i>        | 0.00 | 106 | <i>Ichthyophthirius</i>            |
| 0.01 | 554 | <i>Bilophila</i>             | 0.00 | 221 | <i>Knoellia</i>            | 0.00 | 106 | <i>Mixia</i>                       |
| 0.01 | 554 | <i>Emergencia</i>            | 0.00 | 221 | <i>Sistotremastrum</i>     | 0.00 | 106 | <i>Mannheimia</i>                  |
| 0.01 | 553 | <i>Actinopolymorpha</i>      | 0.00 | 221 | <i>Belliella</i>           | 0.00 | 106 | <i>Prauserella</i>                 |
| 0.01 | 550 | <i>Carnobacterium</i>        | 0.00 | 221 | <i>Sciscionella</i>        | 0.00 | 106 | <i>Thermovibrio</i>                |
| 0.01 | 548 | <i>Insolitispirillum</i>     | 0.00 | 221 | <i>Ilumatobacter</i>       | 0.00 | 106 | <i>Caldimonas</i>                  |
| 0.01 | 546 | <i>Leptomonas</i>            | 0.00 | 220 | <i>Kurthia</i>             | 0.00 | 105 | <i>Linderina</i>                   |
| 0.01 | 545 | <i>Caldicellulosiruptor</i>  | 0.00 | 220 | <i>Oxytricha</i>           | 0.00 | 105 | <i>Pleurocapsa</i>                 |
| 0.01 | 545 | <i>Thermacetogenium</i>      | 0.00 | 220 | <i>Stylonychia</i>         | 0.00 | 105 | <i>Stagonospora</i>                |
| 0.01 | 545 | <i>Thecamonas</i>            | 0.00 | 220 | <i>Arsenicococcus</i>      | 0.00 | 105 | <i>Sodalis</i>                     |
| 0.01 | 544 | <i>Leptotrichia</i>          | 0.00 | 220 | <i>Segetibacter</i>        | 0.00 | 105 | <i>Parvimonas</i>                  |
| 0.01 | 542 | <i>Prochlorococcus</i>       | 0.00 | 220 | <i>Purpureocillium</i>     | 0.00 | 104 | <i>Roseospirillum</i>              |
| 0.01 | 541 | <i>Sporosarcina</i>          | 0.00 | 219 | <i>Rickettsia</i>          | 0.00 | 104 | <i>Natronorubrum</i>               |
| 0.01 | 538 | <i>Calothrix</i>             | 0.00 | 219 | <i>Hypsizygus</i>          | 0.00 | 104 | <i>Crinalium</i>                   |
| 0.01 | 538 | <i>Lysinimicrobium</i>       | 0.00 | 219 | <i>Actinosynnema</i>       | 0.00 | 104 | <i>Acidomyces</i>                  |
| 0.01 | 537 | <i>Chlamydomonas</i>         | 0.00 | 219 | <i>Coprothermobacter</i>   | 0.00 | 104 | <i>Halalkalicoccus</i>             |
| 0.01 | 537 | <i>Deferrisoma</i>           | 0.00 | 219 | <i>Thioalkalimicrobium</i> | 0.00 | 104 | <i>Millerozyma</i>                 |

|      |     |                               |      |     |                         |      |     |                                       |
|------|-----|-------------------------------|------|-----|-------------------------|------|-----|---------------------------------------|
| 0.01 | 536 | <i>Thermodesulfobacterium</i> | 0.00 | 219 | <i>Pseudospirillum</i>  | 0.00 | 104 | <i>Faecalicatena</i>                  |
| 0.01 | 535 | <i>Mucinivorans</i>           | 0.00 | 219 | <i>Perlucidibaca</i>    | 0.00 | 103 | <i>Pseudocohnilembus</i>              |
| 0.01 | 533 | <i>Anaerorhabdus</i>          | 0.00 | 219 | <i>Methyloprofundus</i> | 0.00 | 103 | <i>Rubrimonas</i>                     |
| 0.01 | 533 | <i>Pseudolabrys</i>           | 0.00 | 218 | <i>Botryobasidium</i>   | 0.00 | 103 | <i>Longispora</i>                     |
| 0.01 | 533 | <i>Angelakisella</i>          | 0.00 | 218 | <i>Lacinutrix</i>       | 0.00 | 103 | <i>Meganema</i>                       |
| 0.01 | 531 | <i>Anaerobacillus</i>         | 0.00 | 218 | <i>Neptuniibacter</i>   | 0.00 | 103 | <i>Cribrihabitans</i>                 |
| 0.01 | 530 | <i>Friedmanniella</i>         | 0.00 | 218 | <i>Wohlfahrtiimonas</i> | 0.00 | 103 | <i>Paramesorhizobium</i>              |
| 0.01 | 530 | <i>Hoeflea</i>                | 0.00 | 217 | <i>Eikenella</i>        | 0.00 | 103 | <i>Numidum</i>                        |
| 0.01 | 528 | <i>Tetrasphaera</i>           | 0.00 | 217 | <i>Thermothelomyces</i> | 0.00 | 103 | <i>Immundisolibacter</i>              |
| 0.01 | 528 | <i>Anaerococcus</i>           | 0.00 | 216 | <i>Succinispira</i>     | 0.00 | 102 | <i>Caryophanon</i>                    |
| 0.01 | 527 | <i>Archangium</i>             | 0.00 | 216 | <i>Methylogaea</i>      | 0.00 | 102 | <i>Jeotgalicoccus</i>                 |
| 0.01 | 526 | <i>Lactococcus</i>            | 0.00 | 215 | <i>Ophiostoma</i>       | 0.00 | 102 | <i>Saccharospirillum</i>              |
| 0.01 | 525 | <i>Desulforegula</i>          | 0.00 | 215 | <i>Desulfuromusa</i>    | 0.00 | 102 | <i>Candidatus<br/>Protochlamydia</i>  |
| 0.01 | 525 | <i>Desulfoluna</i>            | 0.00 | 215 | <i>Anaeromyces</i>      | 0.00 | 102 | <i>Flaviramulus</i>                   |
| 0.01 | 525 | <i>Caldisericum</i>           | 0.00 | 215 | <i>Enhygromyxa</i>      | 0.00 | 102 | <i>Marinactinospora</i>               |
| 0.01 | 524 | <i>Subdoligranulum</i>        | 0.00 | 215 | <i>Aureispira</i>       | 0.00 | 101 | <i>Basidiobolus</i>                   |
| 0.01 | 522 | <i>Nostoc</i>                 | 0.00 | 215 | <i>Strigomonas</i>      | 0.00 | 101 | <i>Johnsonella</i>                    |
| 0.01 | 522 | <i>Tepidimonas</i>            | 0.00 | 215 | <i>Paraglaciicola</i>   | 0.00 | 101 | <i>Oenococcus</i>                     |
| 0.01 | 521 | <i>Carboxydotherrmus</i>      | 0.00 | 214 | <i>Thioploca</i>        | 0.00 | 101 | <i>Tetrapisispora</i>                 |
| 0.01 | 519 | <i>Salmonella</i>             | 0.00 | 214 | <i>Weissella</i>        | 0.00 | 101 | <i>Quadrisphaera</i>                  |
| 0.01 | 519 | <i>Mucor</i>                  | 0.00 | 214 | <i>Natrialba</i>        | 0.00 | 101 | <i>Rudanella</i>                      |
| 0.01 | 519 | <i>Aureobasidium</i>          | 0.00 | 214 | <i>Pseudocercospora</i> | 0.00 | 101 | <i>Catelliglobospora</i>              |
| 0.01 | 519 | <i>Rathayibacter</i>          | 0.00 | 213 | <i>Hassallia</i>        | 0.00 | 101 | <i>Dongia</i>                         |
| 0.01 | 519 | <i>Thermaerobacter</i>        | 0.00 | 213 | <i>Bariatricus</i>      | 0.00 | 101 | <i>Candidatus<br/>Paracaedibacter</i> |
| 0.01 | 519 | <i>Phycococcus</i>            | 0.00 | 212 | <i>Sclerotinia</i>      | 0.00 | 100 | <i>Actinotignum</i>                   |
| 0.01 | 518 | <i>Hyphomonas</i>             | 0.00 | 212 | <i>Desulfurispora</i>   | 0.00 | 100 | <i>Massiliomicrobiota</i>             |
| 0.01 | 518 | <i>Isosphaera</i>             | 0.00 | 212 | <i>Hydrotalea</i>       |      |     |                                       |



**Table S3.** Functional overview of initial community (top 500 rank only).

| Rank | Count | Abundance | ID         | Organism                            | Protein Names                                      |
|------|-------|-----------|------------|-------------------------------------|----------------------------------------------------|
| 1    | 4376  | 0.14      | F4BUN6     | <i>Methanosaeta concilii</i>        | Transposase, IS116/IS110/IS902 family              |
| 2    | 3604  | 0.12      | F4BZD0     | <i>Methanosaeta concilii</i>        | Transposase, putative                              |
| 3    | 2697  | 0.09      | F4BY05     | <i>Methanosaeta concilii</i>        | Transposase, IS116/IS110/IS902 family              |
| 4    | 1997  | 0.07      | F4BY15     | <i>Methanosaeta concilii</i>        | Transposase, IS116/IS110/IS902 family              |
| 5    | 1995  | 0.07      | I9R3U4     | <i>Bacteroides cellulosilyticus</i> | Uncharacterized protein                            |
| 6    | 1977  | 0.07      | F4BSV9     | <i>Methanosaeta concilii</i>        | Transposase, IS4 family                            |
| 7    | 1641  | 0.05      | F4BZ63     | <i>Methanosaeta concilii</i>        | Transposase, IS4 family                            |
| 8    | 1506  | 0.05      | F4BSV1     | <i>Methanosaeta concilii</i>        | Transposase, IS4 family, putative                  |
| 9    | 1289  | 0.04      | F4BV05     | <i>Methanosaeta concilii</i>        | Transposase, Rhodopirellula family protein         |
| 10   | 1247  | 0.04      | F4BZW8     | <i>Methanosaeta concilii</i>        | Transposase, IS605 OrfB family                     |
| 11   | 1232  | 0.04      | F4BX44     | <i>Methanosaeta concilii</i>        | Transposase, IS605 OrfB family                     |
| 12   | 1164  | 0.04      | N8ZVC9     | <i>Acinetobacter gernerii</i>       | Uncharacterized protein                            |
| 13   | 1132  | 0.04      | F3ZQL8     | <i>Bacteroides coprosuis</i>        | Transposase IS4 family protein                     |
| 14   | 1125  | 0.04      | F4BYN0     | <i>Methanosaeta concilii</i>        | Transposase, IS605 OrfB family                     |
| 15   | 1124  | 0.04      | N8ZNX3     | <i>Acinetobacter gernerii</i>       | Uncharacterized protein                            |
| 16   | 1122  | 0.04      | F4BXC1     | <i>Methanosaeta concilii</i>        | Transposase, IS4                                   |
| 17   | 981   | 0.03      | F4BV83     | <i>Methanosaeta concilii</i>        | Uncharacterized protein                            |
| 18   | 916   | 0.03      | F4BUD0     | <i>Methanosaeta concilii</i>        | Conserved domain transposase IS605 family          |
| 19   | 872   | 0.03      | F4BVK0     | <i>Methanosaeta concilii</i>        | Transposase, IS116/IS110/IS902 family              |
| 20   | 803   | 0.03      |            |                                     |                                                    |
| 21   | 796   | 0.03      | F4C073     | <i>Methanosaeta concilii</i>        | Transposase, IS605 OrfB family                     |
| 22   | 780   | 0.03      | AOA0R3QEE4 | <i>Brugia timori</i>                | Uncharacterized protein                            |
| 23   | 738   | 0.02      | F4BZ72     | <i>Methanosaeta concilii</i>        | Uncharacterized protein                            |
| 24   | 729   | 0.02      | F4BTW8     | <i>Methanosaeta concilii</i>        | Transposase IS3 family protein, putative integrase |
| 25   | 716   | 0.02      | F4BUB6     | <i>Methanosaeta concilii</i>        | Transposase, IS605 OrfB family                     |
| 26   | 661   | 0.02      | F4BUL3     | <i>Methanosaeta concilii</i>        | Transposase                                        |
| 27   | 624   | 0.02      | H8MU17     | <i>Coralloccoccus coralloides</i>   | Long-chain-fatty-acid--CoA ligase                  |
| 28   | 608   | 0.02      |            |                                     |                                                    |
| 29   | 607   | 0.02      | AOA077XLW5 | <i>Sphinx1.76-related DNA</i>       | Replication protein                                |
| 30   | 592   | 0.02      | F4COV0     | <i>Methanosaeta concilii</i>        | Uncharacterized protein                            |
| 31   | 586   | 0.02      | F4BTV1     | <i>Methanosaeta concilii</i>        | Glycosyltransferase family 36 protein              |
| 32   | 578   | 0.02      | AOA1Q2CUJ4 | <i>Tessaracoccus flavescens</i>     | ISL3 family transposase                            |
| 33   | 570   | 0.02      | F4BZ82     | <i>Methanosaeta concilii</i>        | Cna B domain protein                               |

|    |     |      |            |                                  |                                                       |
|----|-----|------|------------|----------------------------------|-------------------------------------------------------|
| 34 | 555 | 0.02 | F4BV12     | <i>Methanosaeta concilii</i>     | Transposase, Mutator family                           |
| 35 | 549 | 0.02 | F4BTX0     | <i>Methanosaeta concilii</i>     | Conserved domain protein                              |
| 36 | 536 | 0.02 | A0A0T5YH86 | <i>Acinetobacter baumannii</i>   | Mobilization protein A                                |
| 37 | 534 | 0.02 | A0A1Q3QH52 | <i>Bacteroidia bacterium</i>     | Uncharacterized protein                               |
| 38 | 521 | 0.02 | F4BW50     | <i>Methanosaeta concilii</i>     | Transposase, IS605 OrfB family domain protein         |
| 39 | 520 | 0.02 | F4BT92     | <i>Methanosaeta concilii</i>     | Transposase, Mutator family                           |
| 40 | 513 | 0.02 | A0A077XNB6 | <i>Sphinx1.76-related DNA</i>    | Replication protein                                   |
| 41 | 505 | 0.02 | A0A1Q3QCL0 | <i>Bacteroidia bacterium</i>     | Uncharacterized protein                               |
| 42 | 504 | 0.02 | G9FB24     | <i>uncultured bacterium</i>      | IS21 family transposition protein                     |
| 43 | 501 | 0.02 | H8MYX7     | <i>Corallococcus coralloides</i> | Non-ribosomal peptide synthetase/polyketide synthase  |
| 44 | 487 | 0.02 |            |                                  |                                                       |
| 45 | 483 | 0.02 | A0A1Q3QJR2 | <i>Bacteroidia bacterium</i>     | Cell surface protein SprA                             |
| 46 | 482 | 0.02 |            |                                  |                                                       |
| 47 | 481 | 0.02 |            |                                  |                                                       |
| 48 | 478 | 0.02 | F4BW44     | <i>Methanosaeta concilii</i>     | Transposase, IS605 OrfB family                        |
| 49 | 469 | 0.02 | A0A178FWP5 | <i>Acinetobacter sp. SFC</i>     | Transposase                                           |
| 50 | 466 | 0.02 | F4BVI0     | <i>Methanosaeta concilii</i>     | Methyltransferase/glycosyl transferase fusion protein |
| 51 | 437 | 0.01 | F4BXD7     | <i>Methanosaeta concilii</i>     | Transposase, IS4 (Transposase, IS4 family)            |
| 52 | 426 | 0.01 | A0A1M7BMK5 | <i>Fibrobacter sp. UWEL</i>      | Transposase InsO and inactivated derivatives          |
| 53 | 423 | 0.01 |            |                                  |                                                       |
| 54 | 418 | 0.01 |            |                                  |                                                       |
| 55 | 417 | 0.01 | N8QHE7     | <i>Acinetobacter bohemicus</i>   | Uncharacterized protein                               |
| 56 | 414 | 0.01 | A0A1Q3QC75 | <i>Bacteroidia bacterium</i>     | Uncharacterized protein                               |
| 57 | 409 | 0.01 |            | <i>Bacteroidia bacterium</i>     |                                                       |
| 58 | 408 | 0.01 |            |                                  |                                                       |
| 59 | 405 | 0.01 | U6RUP9     | <i>Bacteroides sp.</i>           | Uncharacterized protein                               |
| 60 | 405 | 0.01 |            |                                  |                                                       |
| 61 | 402 | 0.01 |            |                                  |                                                       |
| 62 | 401 | 0.01 |            |                                  |                                                       |
| 63 | 399 | 0.01 | F4BUA5     | <i>Methanosaeta concilii</i>     | Transposase, IS605 OrfB family                        |
| 64 | 393 | 0.01 |            |                                  |                                                       |
| 65 | 384 | 0.01 | A0A1Q3QBX8 | <i>Bacteroidia bacterium</i>     | Uncharacterized protein                               |
| 66 | 383 | 0.01 | F4BUD1     | <i>Methanosaeta concilii</i>     | Transposase, putative                                 |
| 67 | 380 | 0.01 |            |                                  |                                                       |
| 68 | 379 | 0.01 | A0A1Q3QGY6 | <i>Bacteroidia bacterium</i>     | Hybrid sensor histidine kinase/response regulator     |
| 69 | 374 | 0.01 | I2F7Y4     | <i>Mesotoga prima</i>            | Retron-type reverse transcriptase                     |

|     |     |      |            |                                   |                                                                         |
|-----|-----|------|------------|-----------------------------------|-------------------------------------------------------------------------|
| 70  | 370 | 0.01 | T5L8A5     | <i>Microbacterium maritypicum</i> | Uncharacterized protein                                                 |
| 71  | 361 | 0.01 | H8MN58     | <i>Corallococcus coralloides</i>  | Long-chain-fatty-acid--CoA ligase                                       |
| 72  | 356 | 0.01 | A0A1Q3QI02 | <i>Bacteroidia bacterium</i>      | Uncharacterized protein                                                 |
| 73  | 355 | 0.01 | F4BXC2     | <i>Methanosaeta concilii</i>      | Transposase IS200-like protein (Transposase, IS200-like, putative MITE) |
| 74  | 355 | 0.01 | F4BY39     | <i>Methanosaeta concilii</i>      | Transposase, IS605 OrfB family                                          |
| 75  | 351 | 0.01 | A0A0C5RZ24 | <i>Pseudomonas putida</i>         | Adhesin                                                                 |
| 76  | 351 | 0.01 |            |                                   |                                                                         |
| 77  | 348 | 0.01 | F3ZQK5     | <i>Bacteroides coprosuis</i>      | Transposase IS4 family protein                                          |
| 78  | 348 | 0.01 | F4BYV3     | <i>Methanosaeta concilii</i>      | Riboflavin biosynthesis protein RibD C-domain protein                   |
| 79  | 346 | 0.01 |            |                                   |                                                                         |
| 80  | 345 | 0.01 | G9FB23     | <i>uncultured bacterium</i>       | IS21 family transposition protein                                       |
| 81  | 345 | 0.01 |            |                                   |                                                                         |
| 82  | 342 | 0.01 | F4BZ39     | <i>Methanosaeta concilii</i>      | Transposase, IS116/IS110/IS902 family                                   |
| 83  | 340 | 0.01 | A0A1M6CDY9 | <i>Tessaracoccus bendigoensis</i> | Cd2+/Zn2+-exporting ATPase                                              |
| 84  | 336 | 0.01 | F4BXE4     | <i>Methanosaeta concilii</i>      | Conserved domain, transposase IS3 family protein, putative integrase    |
| 85  | 336 | 0.01 |            |                                   |                                                                         |
| 86  | 332 | 0.01 |            |                                   |                                                                         |
| 87  | 331 | 0.01 | N8P3X5     | <i>Acinetobacter bohemicus</i>    | Uncharacterized protein                                                 |
| 88  | 330 | 0.01 |            |                                   |                                                                         |
| 89  | 329 | 0.01 | F4BXF6     | <i>Methanosaeta concilii</i>      | Uncharacterized protein                                                 |
| 90  | 327 | 0.01 | A0A1Q3QHS9 | <i>Bacteroidia bacterium</i>      | Uncharacterized protein                                                 |
| 91  | 322 | 0.01 | H8MSC6     | <i>Corallococcus coralloides</i>  | Non-ribosomal peptide synthetase                                        |
| 92  | 321 | 0.01 |            |                                   |                                                                         |
| 93  | 320 | 0.01 |            |                                   |                                                                         |
| 94  | 314 | 0.01 | F4BVL8     | <i>Methanosaeta concilii</i>      | Uncharacterized protein                                                 |
| 95  | 313 | 0.01 |            |                                   |                                                                         |
| 96  | 311 | 0.01 | F4BZ62     | <i>Methanosaeta concilii</i>      | Conserved domain protein                                                |
| 97  | 307 | 0.01 | A0A1Q3QCN8 | <i>Bacteroidia bacterium</i>      | Uncharacterized protein                                                 |
| 98  | 307 | 0.01 | A0A1Q3QIV6 | <i>Bacteroidia bacterium</i>      | Uncharacterized protein                                                 |
| 99  | 307 | 0.01 | N8YFI4     | <i>Acinetobacter gernerii</i>     | Uncharacterized protein                                                 |
| 100 | 305 | 0.01 |            |                                   |                                                                         |
| 101 | 304 | 0.01 | A0A1Q3QBE7 | <i>Bacteroidia bacterium</i>      | Uncharacterized protein                                                 |
| 102 | 302 | 0.01 | F4BVN9     | <i>Methanosaeta concilii</i>      | Conserved repeat domain protein                                         |
| 103 | 301 | 0.01 | N9GC16     | <i>Acinetobacter lwoffii</i>      | Uncharacterized protein                                                 |
| 104 | 300 | 0.01 | F4BTW7     | <i>Methanosaeta concilii</i>      | Conserved domain protein                                                |
| 105 | 297 | 0.01 | A0A1Q3QDS6 | <i>Bacteroidia bacterium</i>      | Uncharacterized protein                                                 |

|     |     |      |            |                               |                                                     |
|-----|-----|------|------------|-------------------------------|-----------------------------------------------------|
| 106 | 297 | 0.01 | F4BUE8     | <i>Methanosaeta concilii</i>  | Transposase, predicted                              |
| 107 | 291 | 0.01 | A0A1Q3QH6  | <i>Bacteroidia bacterium</i>  | Multidrug transporter AcrB                          |
| 108 | 290 | 0.01 |            |                               |                                                     |
| 109 | 289 | 0.01 |            |                               |                                                     |
| 110 | 288 | 0.01 | A0A1Q3QI54 | <i>Bacteroidia bacterium</i>  | SusC/RagA family TonB-linked outer membrane protein |
| 111 | 287 | 0.01 | F4BXK5     | <i>Methanosaeta concilii</i>  | Transposase                                         |
| 112 | 284 | 0.01 | F4BX50     | <i>Methanosaeta concilii</i>  | Type III restriction enzyme, res subunit            |
| 113 | 284 | 0.01 |            |                               |                                                     |
| 114 | 283 | 0.01 | D2E402     | <i>Kernia pachypleura</i>     | Ribosomal protein 3                                 |
| 115 | 283 | 0.01 |            |                               |                                                     |
| 116 | 282 | 0.01 |            |                               |                                                     |
| 117 | 281 | 0.01 | A0A0W8FAI0 | <i>hydrocarbon metagenome</i> | Uncharacterized protein                             |
| 118 | 281 | 0.01 | A0A1Q3QIY4 | <i>Bacteroidia bacterium</i>  | SusC/RagA family protein                            |
| 119 | 279 | 0.01 | A0A1Q3QGJ2 | <i>Bacteroidia bacterium</i>  | Uncharacterized protein                             |
| 120 | 278 | 0.01 |            |                               |                                                     |
| 121 | 277 | 0.01 |            |                               |                                                     |
| 122 | 276 | 0.01 | N8YF58     | <i>Acinetobacter gernerii</i> | Uncharacterized protein                             |
| 123 | 276 | 0.01 |            |                               |                                                     |
| 124 | 276 | 0.01 |            |                               |                                                     |
| 125 | 275 | 0.01 | A0A1Q3QB47 | <i>Bacteroidia bacterium</i>  | Deoxyribonuclease HsdR                              |
| 126 | 274 | 0.01 | F4BU67     | <i>Methanosaeta concilii</i>  | Multi-sensor hybrid histidine kinase                |
| 127 | 272 | 0.01 | F4BT93     | <i>Methanosaeta concilii</i>  | Uncharacterized protein                             |
| 128 | 272 | 0.01 |            |                               |                                                     |
| 129 | 271 | 0.01 |            |                               |                                                     |
| 130 | 271 | 0.01 |            |                               |                                                     |
| 131 | 269 | 0.01 |            |                               |                                                     |
| 132 | 268 | 0.01 |            |                               |                                                     |
| 133 | 267 | 0.01 |            |                               |                                                     |
| 134 | 267 | 0.01 |            |                               |                                                     |
| 135 | 266 | 0.01 | F4BXN8     | <i>Methanosaeta concilii</i>  | CobN/magnesium chelatase domain protein             |
| 136 | 266 | 0.01 |            |                               |                                                     |
| 137 | 265 | 0.01 |            |                               |                                                     |
| 138 | 263 | 0.01 | A0A1Q3QF20 | <i>Bacteroidia bacterium</i>  | SusC/RagA family protein                            |
| 139 | 263 | 0.01 | A0A1Q3QI16 | <i>Bacteroidia bacterium</i>  | SusC/RagA family TonB-linked outer membrane protein |
| 140 | 262 | 0.01 | A0A1Q3QH94 | <i>Bacteroidia bacterium</i>  | DNA-directed DNA polymerase (EC 2.7.7.7)            |
| 141 | 262 | 0.01 |            |                               |                                                     |

|     |     |      |            |                                   |                                                                                                                                                                        |
|-----|-----|------|------------|-----------------------------------|------------------------------------------------------------------------------------------------------------------------------------------------------------------------|
| 142 | 262 | 0.01 |            |                                   |                                                                                                                                                                        |
| 143 | 262 | 0.01 |            |                                   |                                                                                                                                                                        |
| 144 | 261 | 0.01 |            |                                   |                                                                                                                                                                        |
| 145 | 260 | 0.01 | F4BXH3     | <i>Methanosaeta concilii</i>      | Cobaltochelatae, CobN subunit                                                                                                                                          |
| 146 | 259 | 0.01 | A0A1Q3QIK1 | <i>Bacteroidia bacterium</i>      | Phosphoribosylformylglycinamide synthase (FGAM synthase) (FGAMS) (EC 6.3.5.3)<br>(Formylglycinamide ribonucleotide amidotransferase) (FGAR amidotransferase) (FGAR-AT) |
| 147 | 257 | 0.01 | A0A1Q3Q9Q2 | <i>Bacteroidia bacterium</i>      | SusC/RagA family protein                                                                                                                                               |
| 148 | 257 | 0.01 | F4BT87     | <i>Methanosaeta concilii</i>      | TPR-repeat protein                                                                                                                                                     |
| 149 | 257 | 0.01 | F4BXG6     | <i>Methanosaeta concilii</i>      | Cobaltochelatae, CobN subunit (EC 6.6.1.2)                                                                                                                             |
| 150 | 256 | 0.01 |            |                                   |                                                                                                                                                                        |
| 151 | 253 | 0.01 | A0A1Q3QAN2 | <i>Bacteroidia bacterium</i>      | SusC/RagA family TonB-linked outer membrane protein                                                                                                                    |
| 152 | 251 | 0.01 | A0A1Q3Q9V3 | <i>Bacteroidia bacterium</i>      | Peptidase S9                                                                                                                                                           |
| 153 | 249 | 0.01 | A0A1M6CCR6 | <i>Tessaracoccus bendigoensis</i> | Uncharacterized protein                                                                                                                                                |
| 154 | 249 | 0.01 | A0A1Q3QA74 | <i>Bacteroidia bacterium</i>      | TonB-dependent receptor                                                                                                                                                |
| 155 | 248 | 0.01 | H8MS99     | <i>Corallococcus coralloides</i>  | Adventurous gliding motility protein AgmK                                                                                                                              |
| 156 | 247 | 0.01 | A0A1Q3QBC6 | <i>Bacteroidia bacterium</i>      | Uncharacterized protein                                                                                                                                                |
| 157 | 247 | 0.01 | A0A1Q3QE63 | <i>Bacteroidia bacterium</i>      | Uncharacterized protein                                                                                                                                                |
| 158 | 245 | 0.01 | A0A077XLZ7 | <i>Sphinx1.76-related DNA</i>     | Replication protein                                                                                                                                                    |
| 159 | 245 | 0.01 | A0A1Q3QF86 | <i>Bacteroidia bacterium</i>      | Multidrug transporter AcrB                                                                                                                                             |
| 160 | 244 | 0.01 | F4C043     | <i>Methanosaeta concilii</i>      | Membrane protein, putative                                                                                                                                             |
| 161 | 243 | 0.01 | A0A1G4G9S9 | <i>Petrimonas mucosa</i>          | TonB-dependent receptor SusC                                                                                                                                           |
| 162 | 243 | 0.01 | A0A1Q3QGM8 | <i>Bacteroidia bacterium</i>      | SusC/RagA family TonB-linked outer membrane protein                                                                                                                    |
| 163 | 243 | 0.01 | F4BV15     | <i>Methanosaeta concilii</i>      | Transposase, IS605 OrfB family                                                                                                                                         |
| 164 | 243 | 0.01 |            |                                   |                                                                                                                                                                        |
| 165 | 242 | 0.01 | A0A1Q3QAH7 | <i>Bacteroidia bacterium</i>      | DNA polymerase I (EC 2.7.7.7)                                                                                                                                          |
| 166 | 242 | 0.01 | A0A1Q3QDC9 | <i>Bacteroidia bacterium</i>      | SusC/RagA family TonB-linked outer membrane protein                                                                                                                    |
| 167 | 242 | 0.01 |            |                                   |                                                                                                                                                                        |
| 168 | 241 | 0.01 | F4BWZ9     | <i>Methanosaeta concilii</i>      | Two-component hybrid sensor and regulator                                                                                                                              |
| 169 | 240 | 0.01 | A0A1Q3QBL0 | <i>Bacteroidia bacterium</i>      | Acriflavine resistance protein B                                                                                                                                       |
| 170 | 240 | 0.01 | A0A1Q3QD12 | <i>Bacteroidia bacterium</i>      | SusC/RagA family TonB-linked outer membrane protein                                                                                                                    |
| 171 | 240 | 0.01 |            |                                   |                                                                                                                                                                        |
| 172 | 239 | 0.01 | A0A1Q3QFV8 | <i>Bacteroidia bacterium</i>      | DNA helicase (EC 3.6.4.12)                                                                                                                                             |
| 173 | 239 | 0.01 | F4BUA4     | <i>Methanosaeta concilii</i>      | Transposase, IS605 OrfB family                                                                                                                                         |
| 174 | 238 | 0.01 | F4BTN1     | <i>Methanosaeta concilii</i>      | Two-component hybrid sensor and regulator                                                                                                                              |
| 175 | 238 | 0.01 |            |                                   |                                                                                                                                                                        |
| 176 | 238 | 0.01 |            |                                   |                                                                                                                                                                        |

|     |     |      |            |                                          |                                                                                                                     |
|-----|-----|------|------------|------------------------------------------|---------------------------------------------------------------------------------------------------------------------|
| 177 | 237 | 0.01 | A0A1R3TE89 | <i>Proteiniphilum saccharofermentans</i> | Uncharacterized protein                                                                                             |
| 178 | 237 | 0.01 | F4COL1     | <i>Methanosaeta concilii</i>             | TPR-repeat protein                                                                                                  |
| 179 | 236 | 0.01 |            |                                          |                                                                                                                     |
| 180 | 235 | 0.01 | A0A0N1L384 | <i>Novosphingobium sp. AAP1</i>          | Glutamate dehydrogenase                                                                                             |
| 181 | 235 | 0.01 | A0A1Q3QG05 | <i>Bacteroidia bacterium</i>             | Multifunctional fusion protein [Includes: Protein translocase subunit SecD; Protein-export membrane protein SecF]   |
| 182 | 234 | 0.01 | A0A1M6CDN2 | <i>Tessaracoccus bendigoensis</i>        | Multicopper oxidase with three cupredoxin domains (Includes cell division protein FtsP and spore coat protein CotA) |
| 183 | 234 | 0.01 | A0A1Q3QCP4 | <i>Bacteroidia bacterium</i>             | SusC/RagA family TonB-linked outer membrane protein                                                                 |
| 184 | 234 | 0.01 |            |                                          |                                                                                                                     |
| 185 | 233 | 0.01 | F4BY67     | <i>Methanosaeta concilii</i>             | Uncharacterized protein                                                                                             |
| 186 | 232 | 0.01 |            |                                          |                                                                                                                     |
| 187 | 231 | 0.01 | F4BXB3     | <i>Methanosaeta concilii</i>             | Transposase, IS605 family protein, putative MITE                                                                    |
| 188 | 231 | 0.01 |            |                                          |                                                                                                                     |
| 189 | 231 | 0.01 |            |                                          |                                                                                                                     |
| 190 | 230 | 0.01 | F4BWV9     | <i>Methanosaeta concilii</i>             | S-layer-related duplication domain protein                                                                          |
| 191 | 230 | 0.01 |            |                                          |                                                                                                                     |
| 192 | 228 | 0.01 | A0A1Q3QGP0 | <i>Bacteroidia bacterium</i>             | Glycosyl hydrolase family 35                                                                                        |
| 193 | 228 | 0.01 |            |                                          |                                                                                                                     |
| 194 | 228 | 0.01 |            |                                          |                                                                                                                     |
| 195 | 226 | 0.01 | F4BVL9     | <i>Methanosaeta concilii</i>             | Uncharacterized protein                                                                                             |
| 196 | 226 | 0.01 |            |                                          |                                                                                                                     |
| 197 | 225 | 0.01 |            |                                          |                                                                                                                     |
| 198 | 225 | 0.01 |            |                                          |                                                                                                                     |
| 199 | 224 | 0.01 |            |                                          |                                                                                                                     |
| 200 | 224 | 0.01 |            |                                          |                                                                                                                     |
| 201 | 223 | 0.01 | A0A1Q3QI74 | <i>Bacteroidia bacterium</i>             | Peptidase M16                                                                                                       |
| 202 | 223 | 0.01 | A0A1Q3QIQ0 | <i>Bacteroidia bacterium</i>             | Uncharacterized protein                                                                                             |
| 203 | 223 | 0.01 |            |                                          |                                                                                                                     |
| 204 | 222 | 0.01 | A0A1Q3QBF6 | <i>Bacteroidia bacterium</i>             | SusC/RagA family protein                                                                                            |
| 205 | 222 | 0.01 | A0A1Q3QDK9 | <i>Bacteroidia bacterium</i>             | Uncharacterized protein                                                                                             |
| 206 | 222 | 0.01 | A0A1Q3QJE6 | <i>Bacteroidia bacterium</i>             | Cation transporter                                                                                                  |
| 207 | 222 | 0.01 |            |                                          |                                                                                                                     |
| 208 | 222 | 0.01 |            |                                          |                                                                                                                     |
| 209 | 221 | 0.01 | A0A1Q3QD11 | <i>Bacteroidia bacterium</i>             | SusC/RagA family protein                                                                                            |
| 210 | 220 | 0.01 | A0A1Q3QGR5 | <i>Bacteroidia bacterium</i>             | SusC/RagA family TonB-linked outer membrane protein                                                                 |

|     |     |      |            |                                        |                                                                          |
|-----|-----|------|------------|----------------------------------------|--------------------------------------------------------------------------|
| 211 | 220 | 0.01 | F1Z681     | <i>Novosphingobium nitrogenifigens</i> | Type I site-specific deoxyribonuclease, HsdR family                      |
| 212 | 220 | 0.01 | F4BSZ2     | <i>Methanosaeta concilii</i>           | Oligosaccharyl transferase STT3 subunit                                  |
| 213 | 220 | 0.01 | F4BVN7     | <i>Methanosaeta concilii</i>           | Pentapeptide repeat protein                                              |
| 214 | 220 | 0.01 | F4C050     | <i>Methanosaeta concilii</i>           | Asparagine synthase (Glutamine-hydrolyzing) (EC 6.3.5.4)                 |
| 215 | 220 | 0.01 |            |                                        |                                                                          |
| 216 | 219 | 0.01 | A0A1Q3Q9V2 | <i>Bacteroidia bacterium</i>           | Phosphate transporter                                                    |
| 217 | 219 | 0.01 | A0A1Q3QFQ4 | <i>Bacteroidia bacterium</i>           | Uncharacterized protein                                                  |
| 218 | 219 | 0.01 | F4BVI9     | <i>Methanosaeta concilii</i>           | IS3/IS66 family element, Orf1 protein                                    |
| 219 | 219 | 0.01 |            |                                        |                                                                          |
| 220 | 218 | 0.01 | A0A0W8FC74 | <i>hydrocarbon metagenome</i>          | Sensor histidine kinase                                                  |
| 221 | 218 | 0.01 | F1ZDD0     | <i>Novosphingobium nitrogenifigens</i> | Penicillin amidase family protein                                        |
| 222 | 218 | 0.01 | F4BZ35     | <i>Methanosaeta concilii</i>           | Uncharacterized protein                                                  |
| 223 | 218 | 0.01 |            |                                        |                                                                          |
| 224 | 218 | 0.01 |            |                                        |                                                                          |
| 225 | 218 | 0.01 |            |                                        |                                                                          |
| 226 | 218 | 0.01 |            |                                        |                                                                          |
| 227 | 217 | 0.01 | A0A1Q3QAJ6 | <i>Bacteroidia bacterium</i>           | Uncharacterized protein                                                  |
| 228 | 217 | 0.01 | F4BSW7     | <i>Methanosaeta concilii</i>           | Multi-sensor hybrid histidine kinase                                     |
| 229 | 217 | 0.01 | F4BW20     | <i>Methanosaeta concilii</i>           | Glycosyl transferase group 2/group 1 fusion protein                      |
| 230 | 217 | 0.01 |            |                                        |                                                                          |
| 231 | 216 | 0.01 | A0A1Q3QBY0 | <i>Bacteroidia bacterium</i>           | Phosphoenolpyruvate synthase                                             |
| 232 | 216 | 0.01 | A0A1Q3QCR5 | <i>Bacteroidia bacterium</i>           | Isoleucine--tRNA ligase (EC 6.1.1.5) (Isoleucyl-tRNA synthetase) (IleRS) |
| 233 | 216 | 0.01 | F4BXZ6     | <i>Methanosaeta concilii</i>           | S-layer-related duplication domain protein                               |
| 234 | 216 | 0.01 |            |                                        |                                                                          |
| 235 | 216 | 0.01 |            |                                        |                                                                          |
| 236 | 216 | 0.01 |            |                                        |                                                                          |
| 237 | 215 | 0.01 | A0A0F0LYK2 | <i>Microbacterium ginsengisoli</i>     | Putative cadmium-transporting ATPase (EC 3.6.3.3)                        |
| 238 | 215 | 0.01 | A0A1Q3QJ62 | <i>Bacteroidia bacterium</i>           | Uncharacterized protein (Fragment)                                       |
| 239 | 215 | 0.01 |            |                                        |                                                                          |
| 240 | 214 | 0.01 | A0A1Q3QAN0 | <i>Bacteroidia bacterium</i>           | Uncharacterized protein                                                  |
| 241 | 214 | 0.01 |            |                                        |                                                                          |
| 242 | 214 | 0.01 |            |                                        |                                                                          |
| 243 | 214 | 0.01 |            |                                        |                                                                          |
| 244 | 213 | 0.01 | A0A1Q3Q9W7 | <i>Bacteroidia bacterium</i>           | Uncharacterized protein                                                  |
| 245 | 213 | 0.01 | A0A1Q3QED9 | <i>Bacteroidia bacterium</i>           | Uncharacterized protein                                                  |
| 246 | 213 | 0.01 | A0A1Q3QGE6 | <i>Bacteroidia bacterium</i>           | Uncharacterized protein                                                  |

|     |     |      |            |                                             |                                                     |
|-----|-----|------|------------|---------------------------------------------|-----------------------------------------------------|
| 247 | 213 | 0.01 | A0A1Q3QGG2 | <i>Bacteroidia bacterium</i>                | SusC/RagA family protein                            |
| 248 | 213 | 0.01 |            |                                             |                                                     |
| 249 | 212 | 0.01 | A0A1Q3QDG3 | <i>Bacteroidia bacterium</i>                | SusC/RagA family TonB-linked outer membrane protein |
| 250 | 212 | 0.01 | F0M3U0     | <i>Pseudarthrobacter phenanthrenivorans</i> | Phospholipase/Carboxylesterase                      |
| 251 | 212 | 0.01 |            |                                             |                                                     |
| 252 | 211 | 0.01 | A0A1Q3QC05 | <i>Bacteroidia bacterium</i>                | Uncharacterized protein                             |
| 253 | 211 | 0.01 | A0A1Q3QES6 | <i>Bacteroidia bacterium</i>                | Uncharacterized protein                             |
| 254 | 211 | 0.01 | F4BXL6     | <i>Methanosaeta concilii</i>                | Conserved domain protein                            |
| 255 | 211 | 0.01 |            |                                             |                                                     |
| 256 | 211 | 0.01 |            |                                             |                                                     |
| 257 | 211 | 0.01 |            |                                             |                                                     |
| 258 | 210 | 0.01 | A0A0Q7S8L4 | <i>Pelomonas sp.</i>                        | Transposase                                         |
| 259 | 210 | 0.01 | A0A1Q3QCH6 | <i>Bacteroidia bacterium</i>                | Nitrate reductase subunit alpha                     |
| 260 | 210 | 0.01 | A0A1Q3QFU6 | <i>Bacteroidia bacterium</i>                | TonB-dependent receptor                             |
| 261 | 210 | 0.01 |            |                                             |                                                     |
| 262 | 210 | 0.01 |            |                                             |                                                     |
| 263 | 209 | 0.01 |            |                                             |                                                     |
| 264 | 209 | 0.01 |            |                                             |                                                     |
| 265 | 208 | 0.01 | A0A0N1ANW5 | <i>Novosphingobium sp. AAP1</i>             | Cellulose synthase                                  |
| 266 | 208 | 0.01 | A0A1Q3QAN4 | <i>Bacteroidia bacterium</i>                | Uncharacterized protein                             |
| 267 | 208 | 0.01 | F4BXF7     | <i>Methanosaeta concilii</i>                | Transposase, putative integrase                     |
| 268 | 208 | 0.01 |            |                                             |                                                     |
| 269 | 207 | 0.01 | A0A1Q3QIQ9 | <i>Bacteroidia bacterium</i>                | Uncharacterized protein                             |
| 270 | 207 | 0.01 | F4BYM4     | <i>Methanosaeta concilii</i>                | Chromosome partition protein Smc                    |
| 271 | 207 | 0.01 |            |                                             |                                                     |
| 272 | 207 | 0.01 |            |                                             |                                                     |
| 273 | 206 | 0.01 | A0A1Q3QIR5 | <i>Bacteroidia bacterium</i>                | Alpha-glucan phosphorylase                          |
| 274 | 206 | 0.01 | A0A1Q3QJ29 | <i>Bacteroidia bacterium</i>                | DNA mismatch repair protein MutS                    |
| 275 | 205 | 0.01 | H8MFD7     | <i>Corallococcus coralloides</i>            | Long-chain-fatty-acid--CoA ligase                   |
| 276 | 205 | 0.01 | L7LGQ0     | <i>Gordonia sihwensis</i>                   | Putative non-ribosomal peptide synthetase           |
| 277 | 205 | 0.01 |            |                                             |                                                     |
| 278 | 205 | 0.01 |            |                                             |                                                     |
| 279 | 204 | 0.01 |            |                                             |                                                     |
| 280 | 204 | 0.01 |            |                                             |                                                     |
| 281 | 203 | 0.01 | A0A1G4GAX8 | <i>Petrimonas mucosa</i>                    | Uncharacterized protein                             |
| 282 | 203 | 0.01 | A0A1Q3QDL1 | <i>Bacteroidia bacterium</i>                | Methionine synthase                                 |



|     |     |      |            |                                          |                                                                                                      |
|-----|-----|------|------------|------------------------------------------|------------------------------------------------------------------------------------------------------|
| 283 | 203 | 0.01 | P11408     | <i>Moraxella sp.</i>                     | Modification methylase MspI (M.MspI) (EC 2.1.1.37) (Cytosine-specific methyltransferase MspI)        |
| 284 | 203 | 0.01 |            |                                          |                                                                                                      |
| 285 | 202 | 0.01 |            |                                          |                                                                                                      |
| 286 | 202 | 0.01 |            |                                          |                                                                                                      |
| 287 | 201 | 0.01 | F4BY50     | <i>Methanosaeta concilii</i>             | ATP-dependent RNA helicase, putative                                                                 |
| 288 | 201 | 0.01 |            |                                          |                                                                                                      |
| 289 | 201 | 0.01 |            |                                          |                                                                                                      |
| 290 | 201 | 0.01 |            |                                          |                                                                                                      |
| 291 | 200 | 0.01 | F4BWJ6     | <i>Methanosaeta concilii</i>             | Peptidase families S8 and S53 protein                                                                |
| 292 | 200 | 0.01 | F4BWT2     | <i>Methanosaeta concilii</i>             | DNA polymerase (EC 2.7.7.7)                                                                          |
| 293 | 200 | 0.01 | F5XPC2     | <i>Microlunatus phosphovorius</i>        | Uncharacterized protein                                                                              |
| 294 | 200 | 0.01 |            |                                          |                                                                                                      |
| 295 | 199 | 0.01 | A0A1Q3QB44 | <i>Bacteroidia bacterium</i>             | Uncharacterized protein                                                                              |
| 296 | 199 | 0.01 | A0A1Q3QBJ9 | <i>Bacteroidia bacterium</i>             | Uncharacterized protein                                                                              |
| 297 | 199 | 0.01 | A0A1R3T512 | <i>Proteiniphilum saccharofermentans</i> | TonB-linked outer membrane protein, SusC/RagA family                                                 |
| 298 | 199 | 0.01 | D8L7S1     | <i>Paramecium caudatum</i>               | NADH-ubiquinone oxidoreductase chain 5 (EC 1.6.5.3)                                                  |
| 299 | 198 | 0.01 | A0A0R3R918 | <i>Brugia timori</i>                     | Uncharacterized protein                                                                              |
| 300 | 198 | 0.01 | F4BZ75     | <i>Methanosaeta concilii</i>             | Carbamoyl-phosphate synthase large chain (EC 6.3.5.5) (Carbamoyl-phosphate synthetase ammonia chain) |
| 301 | 198 | 0.01 | S2WV93     | <i>Delftia acidovorans</i>               | Uncharacterized protein                                                                              |
| 302 | 198 | 0.01 |            |                                          |                                                                                                      |
| 303 | 197 | 0.01 |            |                                          |                                                                                                      |
| 304 | 197 | 0.01 |            |                                          |                                                                                                      |
| 305 | 196 | 0.01 | F4BU15     | <i>Methanosaeta concilii</i>             | DNA mismatch repair protein MutS                                                                     |
| 306 | 196 | 0.01 | F5XPA1     | <i>Microlunatus phosphovorius</i>        | Uncharacterized protein                                                                              |
| 307 | 196 | 0.01 |            |                                          |                                                                                                      |
| 308 | 195 | 0.01 | A0A1Q3Q9V6 | <i>Bacteroidia bacterium</i>             | Multidrug transporter AcrB                                                                           |
| 309 | 195 | 0.01 | A0A1Q3QF64 | <i>Bacteroidia bacterium</i>             | Alpha-rhamnosidase                                                                                   |
| 310 | 195 | 0.01 | U6RCL0     | <i>Bacteroides sp. HPS0048</i>           | Uncharacterized protein                                                                              |
| 311 | 195 | 0.01 |            |                                          |                                                                                                      |
| 312 | 194 | 0.01 | A0A1Q3QED5 | <i>Bacteroidia bacterium</i>             | Multidrug transporter AcrB                                                                           |
| 313 | 194 | 0.01 | A0A1Q3QF91 | <i>Bacteroidia bacterium</i>             | Alpha-rhamnosidase                                                                                   |
| 314 | 194 | 0.01 | A0A1Q3QJP8 | <i>Bacteroidia bacterium</i>             | Cytochrome C biogenesis protein                                                                      |
| 315 | 194 | 0.01 |            |                                          |                                                                                                      |
| 316 | 193 | 0.01 | A0A1Q3QGG1 | <i>Bacteroidia bacterium</i>             | Uncharacterized protein                                                                              |

|     |     |      |            |                                   |                                                       |
|-----|-----|------|------------|-----------------------------------|-------------------------------------------------------|
| 317 | 193 | 0.01 | A0A1Q3QIS8 | <i>Bacteroidia bacterium</i>      | NADH dehydrogenase                                    |
| 318 | 193 | 0.01 | F4BVD8     | <i>Methanosaeta concilii</i>      | Cation transporting P-type ATPase                     |
| 319 | 193 | 0.01 | F4BVJ1     | <i>Methanosaeta concilii</i>      | Beta-propeller repeat protein                         |
| 320 | 193 | 0.01 |            |                                   |                                                       |
| 321 | 192 | 0.01 | A0A1Q3QFG4 | <i>Bacteroidia bacterium</i>      | Alpha-galactosidase                                   |
| 322 | 192 | 0.01 | A0A1Q3QFT2 | <i>Bacteroidia bacterium</i>      | Uncharacterized protein                               |
| 323 | 192 | 0.01 | A0A1Q3QI00 | <i>Bacteroidia bacterium</i>      | Tricorn protease homolog (EC 3.4.21.-)                |
| 324 | 192 | 0.01 |            |                                   |                                                       |
| 325 | 192 | 0.01 |            |                                   |                                                       |
| 326 | 192 | 0.01 |            |                                   |                                                       |
| 327 | 191 | 0.01 | F4BVJ0     | <i>Methanosaeta concilii</i>      | Uncharacterized protein                               |
| 328 | 191 | 0.01 | H8MSC8     | <i>Corallocooccus coralloides</i> | Tyrocidine synthase                                   |
| 329 | 191 | 0.01 |            |                                   |                                                       |
| 330 | 191 | 0.01 |            |                                   |                                                       |
| 331 | 190 | 0.01 | A0A154DNE7 | <i>Acinetobacter baumannii</i>    | mRNA endoribonuclease LS (EC 3.1.-.-)                 |
| 332 | 190 | 0.01 | A0A1Q3QFK3 | <i>Bacteroidia bacterium</i>      | Alpha-rhamnosidase                                    |
| 333 | 190 | 0.01 | A0A1Q3QHQ6 | <i>Bacteroidia bacterium</i>      | SusC/RagA family protein                              |
| 334 | 190 | 0.01 | A0A1Q3QIM7 | <i>Bacteroidia bacterium</i>      | Uncharacterized protein                               |
| 335 | 190 | 0.01 |            |                                   |                                                       |
| 336 | 189 | 0.01 | A0A0E3T6K6 | <i>Gordonia phage Gmala1</i>      | Tape measure protein                                  |
| 337 | 189 | 0.01 | A0A1Q3Q9V8 | <i>Bacteroidia bacterium</i>      | TonB-dependent receptor                               |
| 338 | 189 | 0.01 |            |                                   |                                                       |
| 339 | 189 | 0.01 |            |                                   |                                                       |
| 340 | 189 | 0.01 |            |                                   |                                                       |
| 341 | 189 | 0.01 |            |                                   |                                                       |
| 342 | 189 | 0.01 |            |                                   |                                                       |
| 343 | 188 | 0.01 | A0A1Q3QA64 | <i>Bacteroidia bacterium</i>      | Uncharacterized protein                               |
| 344 | 188 | 0.01 | A0A1Q3QD21 | <i>Bacteroidia bacterium</i>      | Beta-galactosidase (EC 3.2.1.23) (Lactase)            |
| 345 | 188 | 0.01 | A0A1Q3QHZ1 | <i>Bacteroidia bacterium</i>      | Peptidase M10A/M12B                                   |
| 346 | 188 | 0.01 | A0A1Q3QI69 | <i>Bacteroidia bacterium</i>      | Uncharacterized protein                               |
| 347 | 188 | 0.01 | A0A1Q3QIW6 | <i>Bacteroidia bacterium</i>      | Uncharacterized protein                               |
| 348 | 188 | 0.01 | F4BZ38     | <i>Methanosaeta concilii</i>      | Transposase, IS116/IS110/IS902 family                 |
| 349 | 188 | 0.01 |            |                                   |                                                       |
| 350 | 187 | 0.01 | A0A1Q3QD59 | <i>Bacteroidia bacterium</i>      | Translation initiation factor IF-2                    |
| 351 | 187 | 0.01 | F4BXQ5     | <i>Methanosaeta concilii</i>      | Two-component hybrid sensor and regulator             |
| 352 | 187 | 0.01 | F4BY09     | <i>Methanosaeta concilii</i>      | DNA polymerase II large subunit (Pol II) (EC 2.7.7.7) |

|     |     |      |            |                                             |                                                                     |
|-----|-----|------|------------|---------------------------------------------|---------------------------------------------------------------------|
| 353 | 187 | 0.01 |            |                                             |                                                                     |
| 354 | 187 | 0.01 |            |                                             |                                                                     |
| 355 | 187 | 0.01 |            |                                             |                                                                     |
| 356 | 187 | 0.01 |            |                                             |                                                                     |
| 357 | 187 | 0.01 |            |                                             |                                                                     |
| 358 | 186 | 0.01 | A0A151BT14 | <i>Branchiibius sp.</i>                     | Mercuric reductase                                                  |
| 359 | 186 | 0.01 | A0A1Q3QCA7 | <i>Bacteroidia bacterium</i>                | Glycosyl hydrolase family 31                                        |
| 360 | 186 | 0.01 | A0A1Q3QGC9 | <i>Bacteroidia bacterium</i>                | Peptidase M16                                                       |
| 361 | 186 | 0.01 | F4BU80     | <i>Methanosaeta concilii</i>                | Transposase, IS605 OrfB family                                      |
| 362 | 186 | 0.01 |            |                                             |                                                                     |
| 363 | 185 | 0.01 | A0A1M3FLT2 | <i>Bacteroidia bacterium</i>                | Uncharacterized protein                                             |
| 364 | 185 | 0.01 | A0A1M6WBE7 | <i>Fibrobacter sp.</i>                      | Transposase (Or an inactivated derivative)                          |
| 365 | 185 | 0.01 | A0A1Q3QA25 | <i>Bacteroidia bacterium</i>                | UvrABC system protein C (Protein UvrC) (Excinuclease ABC subunit C) |
| 366 | 185 | 0.01 | A0A1Q3QD60 | <i>Bacteroidia bacterium</i>                | Alanine racemase (EC 5.1.1.1)                                       |
| 367 | 185 | 0.01 | A0A1Q3QFA7 | <i>Bacteroidia bacterium</i>                | Glycoside hydrolase family 2                                        |
| 368 | 185 | 0.01 | A0A1Q3QG11 | <i>Bacteroidia bacterium</i>                | Capsular biosynthesis protein                                       |
| 369 | 185 | 0.01 | A1W5C2     | <i>Acidovorax sp.</i>                       | IstB domain protein ATP-binding protein                             |
| 370 | 184 | 0.01 | A0A1G4G461 | <i>Petrimonas mucosa</i>                    | Outer membrane protein assembly factor Bama                         |
| 371 | 184 | 0.01 | A0A1Q3QAU4 | <i>Bacteroidia bacterium</i>                | Uncharacterized protein                                             |
| 372 | 184 | 0.01 | A0A1Q3QB09 | <i>Bacteroidia bacterium</i>                | Glycoside hydrolase                                                 |
| 373 | 184 | 0.01 | A0A1Q3QGV1 | <i>Bacteroidia bacterium</i>                | Uncharacterized protein                                             |
| 374 | 184 | 0.01 | A1W6Q0     | <i>Acidovorax sp.</i>                       | Integrase, catalytic region                                         |
| 375 | 184 | 0.01 |            |                                             |                                                                     |
| 376 | 184 | 0.01 |            |                                             |                                                                     |
| 377 | 184 | 0.01 |            |                                             |                                                                     |
| 378 | 184 | 0.01 |            |                                             |                                                                     |
| 379 | 183 | 0.01 | A0A0N0JFZ2 | <i>Novosphingobium sp.</i>                  | Glutamate synthase                                                  |
| 380 | 183 | 0.01 | A0A1Q3QI34 | <i>Bacteroidia bacterium</i>                | Uncharacterized protein                                             |
| 381 | 183 | 0.01 |            |                                             |                                                                     |
| 382 | 183 | 0.01 |            |                                             |                                                                     |
| 383 | 182 | 0.01 | A0A1Q3QBL5 | <i>Bacteroidia bacterium</i>                | Uncharacterized protein                                             |
| 384 | 182 | 0.01 | A0A1Q3QF81 | <i>Bacteroidia bacterium</i>                | Uncharacterized protein                                             |
| 385 | 182 | 0.01 | A0A1Q3QIV4 | <i>Bacteroidia bacterium</i>                | Uncharacterized protein                                             |
| 386 | 182 | 0.01 | F0M493     | <i>Pseudarthrobacter phenanthrenivorans</i> | Uncharacterized protein                                             |
| 387 | 182 | 0.01 | F4BWG4     | <i>Methanosaeta concilii</i>                | Uncharacterized protein                                             |
| 388 | 182 | 0.01 |            |                                             |                                                                     |

|     |     |      |            |                                   |                                                                                                             |
|-----|-----|------|------------|-----------------------------------|-------------------------------------------------------------------------------------------------------------|
| 389 | 182 | 0.01 |            |                                   |                                                                                                             |
| 390 | 181 | 0.01 | A0A1Q3QBI7 | <i>Bacteroidia bacterium</i>      | Uncharacterized protein                                                                                     |
| 391 | 181 | 0.01 | A0A1Q3QIS1 | <i>Bacteroidia bacterium</i>      | Uncharacterized protein                                                                                     |
| 392 | 181 | 0.01 | F4BW92     | <i>Methanosaeta concilii</i>      | Cation-transporting P-type ATPase                                                                           |
| 393 | 181 | 0.01 |            |                                   |                                                                                                             |
| 394 | 180 | 0.01 | C5CEK1     | <i>Kosmotoga olearia</i>          | IstB domain protein ATP-binding protein                                                                     |
| 395 | 180 | 0.01 | F4BWW3     | <i>Methanosaeta concilii</i>      | Alanine--tRNA ligase (EC 6.1.1.7) (Alanyl-tRNA synthetase) (AlaRS)                                          |
| 396 | 180 | 0.01 | F4BXD3     | <i>Methanosaeta concilii</i>      | S-layer-related duplication domain protein                                                                  |
| 397 | 180 | 0.01 |            |                                   |                                                                                                             |
| 398 | 179 | 0.01 | A0A1Q3QBV2 | <i>Bacteroidia bacterium</i>      | Serine protease                                                                                             |
| 399 | 179 | 0.01 | A0A1Q3QF68 | <i>Bacteroidia bacterium</i>      | Glycoside hydrolase                                                                                         |
| 400 | 179 | 0.01 |            |                                   |                                                                                                             |
| 401 | 179 | 0.01 |            |                                   |                                                                                                             |
| 402 | 178 | 0.01 | A0A1Q3QAC3 | <i>Bacteroidia bacterium</i>      | Leucine--tRNA ligase (Fragment)                                                                             |
| 403 | 178 | 0.01 | A0A1Q3QF16 | <i>Bacteroidia bacterium</i>      | Beta-galactosidase (EC 3.2.1.23) (Lactase)                                                                  |
| 404 | 178 | 0.01 | A0A1Q3QFY4 | <i>Bacteroidia bacterium</i>      | Uncharacterized protein                                                                                     |
| 405 | 178 | 0.01 | A0A1Q3QIH3 | <i>Bacteroidia bacterium</i>      | Uncharacterized protein                                                                                     |
| 406 | 178 | 0.01 | H8MH05     | <i>Corallocooccus coralloides</i> | Long-chain-fatty-acid--CoA ligase                                                                           |
| 407 | 178 | 0.01 |            |                                   |                                                                                                             |
| 408 | 178 | 0.01 |            |                                   |                                                                                                             |
| 409 | 177 | 0.01 | A0A1Q3QAJ9 | <i>Bacteroidia bacterium</i>      | Uncharacterized protein                                                                                     |
| 410 | 177 | 0.01 | A0A1Q3QGA2 | <i>Bacteroidia bacterium</i>      | Ferrous iron transport protein B                                                                            |
| 411 | 177 | 0.01 | A0A1Q3QIL1 | <i>Bacteroidia bacterium</i>      | Uncharacterized protein                                                                                     |
| 412 | 177 | 0.01 | A0A1Q3QIP6 | <i>Bacteroidia bacterium</i>      | Transcription-repair-coupling factor (TRCF) (EC 3.6.4.-)                                                    |
| 413 | 177 | 0.01 | A7AI47     | <i>Parabacteroides merdae</i>     | Uncharacterized protein                                                                                     |
| 414 | 177 | 0.01 | F4BYK4     | <i>Methanosaeta concilii</i>      | Leucine--tRNA ligase (EC 6.1.1.4) (Leucyl-tRNA synthetase) (LeuRS)                                          |
| 415 | 177 | 0.01 | P15689     | <i>Paramecium tetraurelia</i>     | NADH-ubiquinone oxidoreductase 49 kDa subunit (EC 1.6.5.3) (EC 1.6.99.3) (NADH dehydrogenase subunit 7)     |
| 416 | 177 | 0.01 | P11405     | <i>Moraxella sp.</i>              | Type-2 restriction enzyme MspI (R.MspI) (EC 3.1.21.4) (Endonuclease MspI) (Type II restriction enzyme MspI) |
| 417 | 177 | 0.01 |            |                                   |                                                                                                             |
| 418 | 177 | 0.01 |            |                                   |                                                                                                             |
| 419 | 177 | 0.01 |            |                                   |                                                                                                             |
| 420 | 177 | 0.01 |            |                                   |                                                                                                             |
| 421 | 177 | 0.01 |            |                                   |                                                                                                             |
| 422 | 176 | 0.01 | A0A1G4GAZ3 | <i>Petrimonas mucosa</i>          | Uncharacterized protein                                                                                     |

|     |     |      |            |                                             |                                                                    |
|-----|-----|------|------------|---------------------------------------------|--------------------------------------------------------------------|
| 423 | 176 | 0.01 | A0A1M6CEL6 | <i>Tessaracoccus bendigoensis</i>           | Uncharacterized protein                                            |
| 424 | 176 | 0.01 | A0A1Q3QAR6 | <i>Bacteroidia bacterium</i>                | Mannose-6-phosphate isomerase                                      |
| 425 | 176 | 0.01 |            |                                             |                                                                    |
| 426 | 176 | 0.01 |            |                                             |                                                                    |
| 427 | 175 | 0.01 | A0A1Q2CK56 | <i>Tessaracoccus sp. NSG39</i>              | Uncharacterized protein                                            |
| 428 | 175 | 0.01 | A0A1Q3QF30 | <i>Bacteroidia bacterium</i>                | Hydrolase                                                          |
| 429 | 175 | 0.01 | A0A1Q3QGE3 | <i>Bacteroidia bacterium</i>                | Uncharacterized protein                                            |
| 430 | 175 | 0.01 |            |                                             |                                                                    |
| 431 | 175 | 0.01 |            |                                             |                                                                    |
| 432 | 175 | 0.01 |            |                                             |                                                                    |
| 433 | 174 | 0.01 | F4BVH9     | <i>Methanosaeta concilii</i>                | Glycosyl transferase, group 2 family protein                       |
| 434 | 174 | 0.01 | N1JKD7     | <i>Mesotoga infera</i>                      | RNA-directed DNA polymerase (Reverse transcriptase)                |
| 435 | 174 | 0.01 |            |                                             |                                                                    |
| 436 | 173 | 0.01 | A0A1Q3QBX1 | <i>Bacteroidia bacterium</i>                | Polysaccharide biosynthesis protein                                |
| 437 | 173 | 0.01 | A0A1Q3QGI1 | <i>Bacteroidia bacterium</i>                | Uncharacterized protein                                            |
| 438 | 173 | 0.01 | A0A1Q3QHE9 | <i>Bacteroidia bacterium</i>                | Glycosyl transferase                                               |
| 439 | 173 | 0.01 | F4BTH0     | <i>Methanosaeta concilii</i>                | Glycosyl transferase, group 2 family protein                       |
| 440 | 173 | 0.01 | F4BTY4     | <i>Methanosaeta concilii</i>                | SNF2 family helicase (EC 3.6.1.-)                                  |
| 441 | 173 | 0.01 |            |                                             |                                                                    |
| 442 | 173 | 0.01 |            |                                             |                                                                    |
| 443 | 172 | 0.01 | A0A180EWA0 | <i>Bacteroidales bacterium</i>              | Replication protein                                                |
| 444 | 172 | 0.01 | A0A1Q3QH96 | <i>Bacteroidia bacterium</i>                | PAS domain-containing sensor histidine kinase                      |
| 445 | 172 | 0.01 | F0M490     | <i>Pseudarthrobacter phenanthrenivorans</i> | DNA primase/polymerase-like protein                                |
| 446 | 172 | 0.01 | F4BSY5     | <i>Methanosaeta concilii</i>                | Uncharacterized protein                                            |
| 447 | 172 | 0.01 |            |                                             |                                                                    |
| 448 | 172 | 0.01 |            |                                             |                                                                    |
| 449 | 171 | 0.01 | A0A1Q3Q9R3 | <i>Bacteroidia bacterium</i>                | DUF5107 domain-containing protein                                  |
| 450 | 171 | 0.01 | A0A1Q3QGP8 | <i>Bacteroidia bacterium</i>                | Glycoside hydrolase                                                |
| 451 | 171 | 0.01 | F4BUE7     | <i>Methanosaeta concilii</i>                | Uncharacterized protein                                            |
| 452 | 171 | 0.01 |            |                                             |                                                                    |
| 453 | 171 | 0.01 |            |                                             |                                                                    |
| 454 | 171 | 0.01 |            |                                             |                                                                    |
| 455 | 170 | 0.01 | A0A1Q3QEW4 | <i>Bacteroidia bacterium</i>                | Alanine--tRNA ligase (EC 6.1.1.7) (Alanyl-tRNA synthetase) (AlaRS) |
| 456 | 170 | 0.01 | A0A1Q3QGC5 | <i>Bacteroidia bacterium</i>                | Uncharacterized protein                                            |
| 457 | 170 | 0.01 | A0A1Q3QGL6 | <i>Bacteroidia bacterium</i>                | Copper-translocating P-type ATPase                                 |
| 458 | 170 | 0.01 | A0A1Q3QID2 | <i>Bacteroidia bacterium</i>                | Uncharacterized protein                                            |

|     |     |      |            |                                         |                                                                                                                                          |
|-----|-----|------|------------|-----------------------------------------|------------------------------------------------------------------------------------------------------------------------------------------|
| 459 | 170 | 0.01 | D8L7R1     | <i>Paramecium caudatum</i>              | NADH-ubiquinone oxidoreductase chain 4 (EC 1.6.5.3)                                                                                      |
| 460 | 170 | 0.01 | F4BY71     | <i>Methanosaeta concilii</i>            | WD40-like Beta Propeller Repeat protein                                                                                                  |
| 461 | 170 | 0.01 | I4ZNR1     | <i>Acinetobacter sp. HA</i>             | Uncharacterized protein (Fragment)                                                                                                       |
| 462 | 170 | 0.01 | I8W058     | <i>Bacteroides cellulosilyticus</i>     | Uncharacterized protein                                                                                                                  |
| 463 | 169 | 0.01 | AOA098BYW1 | <i>Fermentimonas caenicola</i>          | Transposase                                                                                                                              |
| 464 | 169 | 0.01 | AOA1G4G8N7 | <i>Petrimonas mucosa</i>                | ATP-dependent DNA helicase RecQ (EC 3.6.4.12)                                                                                            |
| 465 | 169 | 0.01 | AOA1Q3QBS3 | <i>Bacteroidia bacterium</i>            | Uncharacterized protein                                                                                                                  |
| 466 | 169 | 0.01 | AOA1Q3QFW3 | <i>Bacteroidia bacterium</i>            | Alpha-mannosidase                                                                                                                        |
| 467 | 169 | 0.01 | AOA1Q3QIT0 | <i>Bacteroidia bacterium</i>            | Polyphosphate kinase (EC 2.7.4.1) (ATP-polyphosphate phosphotransferase) (Polyphosphoric acid kinase)                                    |
| 468 | 169 | 0.01 |            |                                         |                                                                                                                                          |
| 469 | 169 | 0.01 | V2USD3     | <i>Acinetobacter brisouii</i>           | Uncharacterized protein                                                                                                                  |
| 470 | 169 | 0.01 | W9GKA2     | <i>Intrasporangium chromatireducens</i> | DNA primase (EC 2.7.7.-)                                                                                                                 |
| 471 | 168 | 0.01 | AOA023UP33 | <i>Magnusiomyces ingens</i>             | Uncharacterized protein (Fragment)                                                                                                       |
| 472 | 168 | 0.01 | AOA1Q3Q9X7 | <i>Bacteroidia bacterium</i>            | Uncharacterized protein                                                                                                                  |
| 473 | 168 | 0.01 | AOA1Q3QFZ4 | <i>Bacteroidia bacterium</i>            | Uncharacterized protein                                                                                                                  |
| 474 | 168 | 0.01 | F1Z7R9     | <i>Novosphingobium nitrogenifigens</i>  | Type-IV secretion system protein TraC                                                                                                    |
| 475 | 168 | 0.01 | F4BTS2     | <i>Methanosaeta concilii</i>            | M6 family metalloprotease domain protein                                                                                                 |
| 476 | 168 | 0.01 | F4BVQ0     | <i>Methanosaeta concilii</i>            | Uncharacterized protein                                                                                                                  |
| 477 | 168 | 0.01 |            |                                         |                                                                                                                                          |
| 478 | 168 | 0.01 |            |                                         |                                                                                                                                          |
| 479 | 168 | 0.01 |            |                                         |                                                                                                                                          |
| 480 | 167 | 0.01 | AOA0M3AFY3 | <i>Acinetobacter sp.</i>                | Cytochrome C peroxidase                                                                                                                  |
| 481 | 167 | 0.01 | AOA1Q3QAM8 | <i>Bacteroidia bacterium</i>            | Uncharacterized protein                                                                                                                  |
| 482 | 167 | 0.01 | AOA1Q3QC30 | <i>Bacteroidia bacterium</i>            | 4-alpha-glucanotransferase                                                                                                               |
| 483 | 167 | 0.01 | AOA1Q3QC51 | <i>Bacteroidia bacterium</i>            | Valine--tRNA ligase (EC 6.1.1.9) (Valyl-tRNA synthetase) (ValRS)                                                                         |
| 484 | 167 | 0.01 | AOA1Q3QCU6 | <i>Bacteroidia bacterium</i>            | Uncharacterized protein                                                                                                                  |
| 485 | 167 | 0.01 | F4BXE8     | <i>Methanosaeta concilii</i>            | Conserved domain protein                                                                                                                 |
| 486 | 167 | 0.01 | F4BZQ7     | <i>Methanosaeta concilii</i>            | S-layer-related duplication domain protein                                                                                               |
| 487 | 167 | 0.01 | A6LE80     | <i>Parabacteroides distasonis</i>       | DNA-directed RNA polymerase subunit beta' (RNAP subunit beta') (EC 2.7.7.6) (RNA polymerase subunit beta') (Transcriptase subunit beta') |
| 488 | 167 | 0.01 |            |                                         |                                                                                                                                          |
| 489 | 167 | 0.01 |            |                                         |                                                                                                                                          |
| 490 | 166 | 0.01 | AOA1Q3QC45 | <i>Bacteroidia bacterium</i>            | Uncharacterized protein                                                                                                                  |
| 491 | 166 | 0.01 | AOA1Q3QFI3 | <i>Bacteroidia bacterium</i>            | DNA topoisomerase IV                                                                                                                     |
| 492 | 166 | 0.01 | F4BU69     | <i>Methanosaeta concilii</i>            | Hydrophobe/amphiphile efflux-3 (HAE3) family transporter                                                                                 |

|     |     |      |            |                                  |                                      |
|-----|-----|------|------------|----------------------------------|--------------------------------------|
| 493 | 166 | 0.01 | F4BXP6     | <i>Methanosaeta concilii</i>     | IS66 family element, transposase     |
| 494 | 166 | 0.01 | F4C0R1     | <i>Methanosaeta concilii</i>     | Uncharacterized protein              |
| 495 | 166 | 0.01 | H8MK59     | <i>Corallococcus coralloides</i> | Linear gramicidin synthase subunit C |
| 496 | 166 | 0.01 |            |                                  |                                      |
| 497 | 165 | 0.01 | A0A1Q3QDR2 | <i>Bacteroidia bacterium</i>     | Uncharacterized protein              |
| 498 | 165 | 0.01 | A0A1Q3QEA7 | <i>Bacteroidia bacterium</i>     | Acriflavine resistance protein B     |
| 499 | 165 | 0.01 | A0A1Q3QGG3 | <i>Bacteroidia bacterium</i>     | Hydrolase                            |
| 500 | 165 | 0.01 | F4BWB4     | <i>Methanosaeta concilii</i>     | TPR-repeat protein                   |

**Table S4a.** Functional overview of M1A community (top 500 rank only).

| Rank | Count | Abundance | ID         | Organism                            | Protein Names                                                                                                                            |
|------|-------|-----------|------------|-------------------------------------|------------------------------------------------------------------------------------------------------------------------------------------|
| 1    | 3584  | 0.12      | A0A0D5N7W1 | <i>Geobacter sulfurreducens</i>     | ATPase                                                                                                                                   |
| 2    | 3399  | 0.12      |            | NA                                  | NA                                                                                                                                       |
| 3    | 3122  | 0.11      | Q39Y12     | <i>Geobacter metallireducens</i>    | DNA-directed RNA polymerase subunit beta' (RNAP subunit beta') (EC 2.7.7.6) (RNA polymerase subunit beta') (Transcriptase subunit beta') |
| 4    | 3076  | 0.11      | Q39RM9     | <i>Geobacter metallireducens</i>    | Membrane protein, putative                                                                                                               |
| 5    | 3014  | 0.10      | Q74AK2     | <i>Geobacter sulfurreducens</i>     | Sodium/solute symporter family protein                                                                                                   |
| 6    | 2908  | 0.10      | Q748Y6     | <i>Geobacter sulfurreducens</i>     | DNA-directed RNA polymerase subunit beta (RNAP subunit beta) (EC 2.7.7.6) (RNA polymerase subunit beta) (Transcriptase subunit beta)     |
| 7    | 2778  | 0.10      | A0A0L8ETQ7 | <i>Achromobacter sp.</i>            | Uncharacterized protein                                                                                                                  |
| 8    | 2592  | 0.09      | Q747C7     | <i>Geobacter sulfurreducens</i>     | 60 kDa chaperonin (GroEL protein) (Protein Cpn60)                                                                                        |
| 9    | 2557  | 0.09      |            |                                     |                                                                                                                                          |
| 10   | 2544  | 0.09      | Q748X8     | <i>Geobacter sulfurreducens</i>     | Elongation factor Tu (EF-Tu)                                                                                                             |
| 11   | 2541  | 0.09      | E8WU24     | <i>Geobacter sp.</i>                | Helicase domain protein                                                                                                                  |
| 12   | 2507  | 0.09      | A5GAB4     | <i>Geobacter uraniireducens</i>     | Putative GAF sensor protein                                                                                                              |
| 13   | 2448  | 0.08      |            |                                     |                                                                                                                                          |
| 14   | 2424  | 0.08      | A0A1F9PUL2 | <i>Desulfuromonadales bacterium</i> | Restriction endonuclease                                                                                                                 |
| 15   | 2416  | 0.08      | A0A0D5N8M0 | <i>Geobacter sulfurreducens</i>     | MgtE integral membrane protein                                                                                                           |
| 16   | 2342  | 0.08      | A0A0B5BF68 | <i>Geobacter pickeringii</i>        | CRISPR-associated protein Cas3                                                                                                           |
| 17   | 2334  | 0.08      | Q748Y8     | <i>Geobacter sulfurreducens</i>     | Elongation factor G 2 (EF-G 2)                                                                                                           |
| 18   | 2274  | 0.08      | Q749A7     | <i>Geobacter sulfurreducens</i>     | Protein translocase subunit SecY                                                                                                         |
| 19   | 2266  | 0.08      | A0A0B4XMH5 | <i>Alcanivorax pacificus</i>        | Adenine-specific DNA methylase containing a Zn-ribbon                                                                                    |
| 20   | 2243  | 0.08      | A0A1G0M9J2 | <i>Geobacteraceae bacterium</i>     | Uncharacterized protein                                                                                                                  |
| 21   | 2241  | 0.08      |            |                                     |                                                                                                                                          |
| 22   | 2043  | 0.07      | Q74FF1     | <i>Geobacter sulfurreducens</i>     | Chaperone protein ClpB                                                                                                                   |
| 23   | 2015  | 0.07      | A0A0C5IZ87 | <i>Rugosibacter aromaticivorans</i> | Uncharacterized protein                                                                                                                  |
| 24   | 1982  | 0.07      | A0A0B5BJ81 | <i>Geobacter pickeringii</i>        | NADH-quinone oxidoreductase subunit D (EC 1.6.5.11) (NADH dehydrogenase I subunit D) (NDH-1 subunit D)                                   |



|    |      |      |            |                                      |                                                                                                                                                                                          |
|----|------|------|------------|--------------------------------------|------------------------------------------------------------------------------------------------------------------------------------------------------------------------------------------|
| 25 | 1958 | 0.07 | AOA0B5BF21 | <i>Geobacter pickeringii</i>         | Glycosyl transferase family 1                                                                                                                                                            |
| 26 | 1954 | 0.07 | A1AKN8     | <i>Pelobacter propionicus</i>        | Resolvase, N-terminal domain protein                                                                                                                                                     |
| 27 | 1953 | 0.07 | Q39QB9     | <i>Geobacter metallireducens</i>     | NADH dehydrogenase I, M subunit                                                                                                                                                          |
| 28 | 1926 | 0.07 | A0A0B5B7H3 | <i>Geobacter pickeringii</i>         | Cytochrome C                                                                                                                                                                             |
| 29 | 1904 | 0.07 | A0A0D5N8Q4 | <i>Geobacter sulfurreducens</i>      | Transposase                                                                                                                                                                              |
| 30 | 1875 | 0.06 | Q39Q43     | <i>Geobacter metallireducens</i>     | Pyruvate-flavodoxin oxidoreductase (EC 1.2.7.-)                                                                                                                                          |
| 31 | 1869 | 0.06 | Q747X9     | <i>Geobacter sulfurreducens</i>      | Isoleucine--tRNA ligase (EC 6.1.1.5) (Isoleucyl-tRNA synthetase) (IleRS)                                                                                                                 |
| 32 | 1857 | 0.06 | S0G1I5     | <i>Desulfotignum phosphitoxidans</i> | Type I restriction enzyme HindVIIP/EcoKI protein HsdR (EC 3.1.21.3)                                                                                                                      |
| 33 | 1854 | 0.06 | Q74FK9     | <i>Geobacter sulfurreducens</i>      | Sigma-54-dependent transcriptional response regulator                                                                                                                                    |
| 34 | 1851 | 0.06 | Q39U60     | <i>Geobacter metallireducens</i>     | Translation elongation factor G                                                                                                                                                          |
| 35 | 1843 | 0.06 | AOA1S0XXD8 | <i>Rhodanobacter sp.</i>             | Histidine kinase                                                                                                                                                                         |
| 36 | 1835 | 0.06 | A0A0A8WNU3 | <i>Geobacter sp.</i>                 | Protein TraC                                                                                                                                                                             |
| 37 | 1797 | 0.06 | Q39WU2     | <i>Geobacter metallireducens</i>     | Phosphate-selective outer membrane channel                                                                                                                                               |
| 38 | 1776 | 0.06 | Q74C76     | <i>Geobacter sulfurreducens</i>      | (R)-citramalate synthase (EC 2.3.1.182) (Citramalate synthase)                                                                                                                           |
| 39 | 1745 | 0.06 | Q39QB2     | <i>Geobacter metallireducens</i>     | NADH dehydrogenase I, F subunit                                                                                                                                                          |
| 40 | 1743 | 0.06 | Q747H5     | <i>Geobacter sulfurreducens</i>      | K(+)-insensitive pyrophosphate-energized proton pump (EC 3.6.1.1) (Membrane-bound proton-translocating pyrophosphatase) (Pyrophosphate-energized inorganic pyrophosphatase) (H(+)-PPase) |
| 41 | 1736 | 0.06 | A0A0B5BJ46 | <i>Geobacter pickeringii</i>         | Uncharacterized protein                                                                                                                                                                  |
| 42 | 1727 | 0.06 | A0A0B5BB65 | <i>Geobacter pickeringii</i>         | Uncharacterized protein                                                                                                                                                                  |
| 43 | 1718 | 0.06 | A0A0B5BCT5 | <i>Geobacter pickeringii</i>         | NADH dehydrogenase                                                                                                                                                                       |
| 44 | 1687 | 0.06 | Q39ZC8     | <i>Geobacter metallireducens</i>     | Ferredoxin-dependent glutamate synthase                                                                                                                                                  |
| 45 | 1683 | 0.06 | A0A0D5NE26 | <i>Geobacter sulfurreducens</i>      | Multidrug resistance protein B                                                                                                                                                           |
| 46 | 1653 | 0.06 | A5GFJ7     | <i>Geobacter uraniireducens</i>      | Erythronolide synthase (EC 2.3.1.94)                                                                                                                                                     |
| 47 | 1650 | 0.06 | Q3A5L6     | <i>Pelobacter carbinolicus</i>       | Uncharacterized protein                                                                                                                                                                  |
| 48 | 1635 | 0.06 | A0A0L8EU90 | <i>Achromobacter sp.</i>             | Uncharacterized protein                                                                                                                                                                  |
| 49 | 1635 | 0.06 | Q74FM6     | <i>Geobacter sulfurreducens</i>      | Pyruvate, phosphate dikinase (EC 2.7.9.1)                                                                                                                                                |
| 50 | 1634 | 0.06 |            |                                      |                                                                                                                                                                                          |

|    |      |      |            |                                  |                                                                                                        |
|----|------|------|------------|----------------------------------|--------------------------------------------------------------------------------------------------------|
| 51 | 1625 | 0.06 | AOA0D5NDJ8 | <i>Geobacter sulfurreducens</i>  | Stage II sporulation protein E                                                                         |
| 52 | 1621 | 0.06 |            |                                  |                                                                                                        |
| 53 | 1603 | 0.06 | Q39RM8     | <i>Geobacter metallireducens</i> | Glycosyltransferase                                                                                    |
| 54 | 1589 | 0.05 | Q39YK5     | <i>Geobacter metallireducens</i> | Flagellar biogenesis protein FlhA                                                                      |
| 55 | 1587 | 0.05 | AOA0D5N2P4 | <i>Geobacter sulfurreducens</i>  | Uncharacterized protein                                                                                |
| 56 | 1585 | 0.05 | AOA0B5BK17 | <i>Geobacter pickeringii</i>     | Diguanylate cyclase                                                                                    |
| 57 | 1563 | 0.05 |            |                                  |                                                                                                        |
| 58 | 1559 | 0.05 | AOA0D5N8G6 | <i>Geobacter sulfurreducens</i>  | Cation transporter                                                                                     |
| 59 | 1552 | 0.05 |            |                                  |                                                                                                        |
| 60 | 1548 | 0.05 | AOA1T4RHG2 | <i>Geobacter thiogenes</i>       | Nif-specific regulatory protein                                                                        |
| 61 | 1538 | 0.05 | AOA0B5BDJ5 | <i>Geobacter pickeringii</i>     | NADH-quinone oxidoreductase subunit H (EC 1.6.5.11) (NADH dehydrogenase I subunit H) (NDH-1 subunit H) |
| 62 | 1515 | 0.05 | AOA0B5B8A8 | <i>Geobacter pickeringii</i>     | Valine--tRNA ligase (EC 6.1.1.9) (Valyl-tRNA synthetase) (ValRS)                                       |
| 63 | 1514 | 0.05 | Q39Y76     | <i>Geobacter metallireducens</i> | Sigma-54-dependent transcriptional response regulator                                                  |
| 64 | 1507 | 0.05 | AOA0D5N8Q2 | <i>Geobacter sulfurreducens</i>  | Uncharacterized protein                                                                                |
| 65 | 1503 | 0.05 | AOA0D5N8I5 | <i>Geobacter sulfurreducens</i>  | Signal recognition particle protein (Fifty-four homolog)                                               |
| 66 | 1490 | 0.05 | Q748Z4     | <i>Geobacter sulfurreducens</i>  | 30S ribosomal protein S3                                                                               |
| 67 | 1479 | 0.05 | AOA0B5BJ26 | <i>Geobacter pickeringii</i>     | Uncharacterized protein                                                                                |
| 68 | 1472 | 0.05 |            |                                  |                                                                                                        |
| 69 | 1466 | 0.05 |            |                                  |                                                                                                        |
| 70 | 1458 | 0.05 | A1AKK8     | <i>Pelobacter propionicus</i>    | Uncharacterized protein                                                                                |
| 71 | 1450 | 0.05 | Q746X3     | <i>Geobacter sulfurreducens</i>  | Bifunctional protein PutA                                                                              |
| 72 | 1448 | 0.05 | Q39QB8     | <i>Geobacter metallireducens</i> | NADH dehydrogenase I, L subunit                                                                        |
| 73 | 1445 | 0.05 | AOA0B5BI89 | <i>Geobacter pickeringii</i>     | Type II secretion system protein                                                                       |
| 74 | 1445 | 0.05 | Q74H82     | <i>Geobacter sulfurreducens</i>  | Flagellar biogenesis master response receiver sensor histidine kinase, PAS and GAF domain-containing   |
| 75 | 1433 | 0.05 | Q747M6     | <i>Geobacter sulfurreducens</i>  | Ribonuclease G                                                                                         |
| 76 | 1432 | 0.05 | Q74H58     | <i>Geobacter sulfurreducens</i>  | Chaperone protein DnaJ                                                                                 |

|    |      |      |            |                                  |                                                                                                                                                                                                                                                                                                                                                    |
|----|------|------|------------|----------------------------------|----------------------------------------------------------------------------------------------------------------------------------------------------------------------------------------------------------------------------------------------------------------------------------------------------------------------------------------------------|
| 77 | 1431 | 0.05 | AOA0D5N8S3 | <i>Geobacter sulfurreducens</i>  | NADH dehydrogenase                                                                                                                                                                                                                                                                                                                                 |
| 78 | 1421 | 0.05 | AOA0D5N8E2 | <i>Geobacter sulfurreducens</i>  | ATP synthase (EC 3.6.3.14)                                                                                                                                                                                                                                                                                                                         |
| 79 | 1417 | 0.05 | Q39RL8     | <i>Geobacter metallireducens</i> | Undecaprenyl-diphospho-oligosaccharide flippase                                                                                                                                                                                                                                                                                                    |
| 80 | 1404 | 0.05 | Q39XL9     | <i>Geobacter metallireducens</i> | Sensor sigma-54-dependent transcriptional regulator, GAF and GAF domain-containing                                                                                                                                                                                                                                                                 |
| 81 | 1397 | 0.05 | A5GB28     | <i>Geobacter uraniireducens</i>  | Plasmid maintenance system antidote protein, XRE family                                                                                                                                                                                                                                                                                            |
| 82 | 1397 | 0.05 | B3E9R4     | <i>Geobacter lovleyi</i>         | Isocitrate dehydrogenase, NADP-dependent (EC 1.1.1.42)                                                                                                                                                                                                                                                                                             |
| 83 | 1392 | 0.05 | A0A0D5NAK5 | <i>Geobacter sulfurreducens</i>  | Bifunctional uridylyltransferase/uridylyl-removing enzyme (UTase/UR) (Bifunctional [protein-PII] modification enzyme) (Bifunctional nitrogen sensor protein) [Includes: [Protein-PII]-UMP uridylyl-removing enzyme (UR) (EC 3.1.4.-); [Protein-PII] uridylyltransferase (PII uridylyltransferase) (UTase) (EC 2.7.7.59)]                           |
| 84 | 1388 | 0.05 | A0A0D5N712 | <i>Geobacter sulfurreducens</i>  | Phosphoglucomutase                                                                                                                                                                                                                                                                                                                                 |
| 85 | 1386 | 0.05 | Q39ZH1     | <i>Geobacter metallireducens</i> | Glutamine--fructose-6-phosphate aminotransferase [isomerizing] (EC 2.6.1.16) (D-fructose-6-phosphate amidotransferase) (GFAT) (Glucosamine-6-phosphate synthase) (Hexosephosphate aminotransferase) (L-glutamine--D-fructose-6-phosphate amidotransferase)                                                                                         |
| 86 | 1381 | 0.05 | A0A0D5ND20 | <i>Geobacter sulfurreducens</i>  | Amino acid dehydrogenase                                                                                                                                                                                                                                                                                                                           |
| 87 | 1379 | 0.05 | A0A1G0M577 | <i>Geobacteraceae bacterium</i>  | Uncharacterized protein                                                                                                                                                                                                                                                                                                                            |
| 88 | 1374 | 0.05 | Q74AK3     | <i>Geobacter sulfurreducens</i>  | Cation-translocating P-type ATPase                                                                                                                                                                                                                                                                                                                 |
| 89 | 1373 | 0.05 | Q39ZK4     | <i>Geobacter metallireducens</i> | Bifunctional glutamine synthetase adenylyltransferase/adenylyl-removing enzyme (ATP:glutamine synthetase adenylyltransferase) (ATase) [Includes: Glutamine synthetase adenylyl-L-tyrosine phosphorylase (EC 2.7.7.89) (Adenylyl removase) (AR) (AT-N); Glutamine synthetase adenylyl transferase (EC 2.7.7.42) (Adenylyl transferase) (AT) (AT-C)] |
| 90 | 1372 | 0.05 | A0A0B5BIS9 | <i>Geobacter pickeringii</i>     | Multidrug transporter AcrB                                                                                                                                                                                                                                                                                                                         |
| 91 | 1369 | 0.05 | A0A0B5BH93 | <i>Geobacter pickeringii</i>     | C-and b-type cytochrome L                                                                                                                                                                                                                                                                                                                          |
| 92 | 1369 | 0.05 | A0A0D5N5P7 | <i>Geobacter sulfurreducens</i>  | Chemotaxis protein                                                                                                                                                                                                                                                                                                                                 |
| 93 | 1357 | 0.05 | B5EGM4     | <i>Geobacter bemidjiensis</i>    | Glycerol/1,2-propanediol dehydratase                                                                                                                                                                                                                                                                                                               |
| 94 | 1349 | 0.05 | B3EAX1     | <i>Geobacter lovleyi</i>         | Protein CyaE                                                                                                                                                                                                                                                                                                                                       |
| 95 | 1335 | 0.05 | A0A1G0MAK9 | <i>Geobacteraceae bacterium</i>  | Sodium:proton exchanger                                                                                                                                                                                                                                                                                                                            |
| 96 | 1333 | 0.05 | Q74FD5     | <i>Geobacter sulfurreducens</i>  | Hydroxylamine reductase (EC 1.7.99.1) (Hybrid-cluster protein) (HCP) (Prismane protein)                                                                                                                                                                                                                                                            |
| 97 | 1329 | 0.05 | B3EA87     | <i>Geobacter lovleyi</i>         | RNA polymerase sigma factor                                                                                                                                                                                                                                                                                                                        |
| 98 | 1325 | 0.05 | Q39ZE7     | <i>Geobacter metallireducens</i> | UvrABC system protein A (UvrA protein) (Excinuclease ABC subunit A)                                                                                                                                                                                                                                                                                |

|     |      |      |            |                                  |                                                                                                                                      |
|-----|------|------|------------|----------------------------------|--------------------------------------------------------------------------------------------------------------------------------------|
| 99  | 1322 | 0.05 | Q39T74     | <i>Geobacter metallireducens</i> | GTP/GDP 3'-pyrophosphokinase and (P)ppGpp 3'-pyrophosphohydrolase                                                                    |
| 100 | 1318 | 0.05 | AOA0D5ND99 | <i>Geobacter sulfurreducens</i>  | ATPase AAA                                                                                                                           |
| 101 | 1302 | 0.05 | Q39QD0     | <i>Geobacter metallireducens</i> | Periplasmically oriented, membrane-bound [NiFe]-hydrogenase, large subunit                                                           |
| 102 | 1297 | 0.04 | Q39Q36     | <i>Geobacter metallireducens</i> | Heterodisulfide oxidoreductase, FAD-binding and iron-sulfur cluster-binding subunit A                                                |
| 103 | 1285 | 0.04 | AOA0D5N7R7 | <i>Geobacter sulfurreducens</i>  | GntR family transcriptional regulator                                                                                                |
| 104 | 1281 | 0.04 | AOA0B5BDE2 | <i>Geobacter pickeringii</i>     | ATP phosphoribosyltransferase regulatory subunit                                                                                     |
| 105 | 1275 | 0.04 | B3EAX6     | <i>Geobacter lovleyi</i>         | Uncharacterized protein                                                                                                              |
| 106 | 1272 | 0.04 | AOA0C1U608 | <i>Geobacter soli</i>            | Chemotaxis protein                                                                                                                   |
| 107 | 1268 | 0.04 | A5GFJ6     | <i>Geobacter uraniireducens</i>  | Beta-hydroxyacyl-(Acyl-carrier-protein) dehydratase, FabA/FabZ                                                                       |
| 108 | 1265 | 0.04 | AOA0B5BAC1 | <i>Geobacter pickeringii</i>     | Dihydrolipoyl dehydrogenase (EC 1.8.1.4)                                                                                             |
| 109 | 1263 | 0.04 | Q39V52     | <i>Geobacter metallireducens</i> | GAF sensor methyl-accepting chemotaxis sensory transducer, class 40H                                                                 |
| 110 | 1255 | 0.04 | A5GAY1     | <i>Geobacter uraniireducens</i>  | DNA-directed RNA polymerase subunit beta (RNAP subunit beta) (EC 2.7.7.6) (RNA polymerase subunit beta) (Transcriptase subunit beta) |
| 111 | 1243 | 0.04 | B5EFV6     | <i>Geobacter bemidjiensis</i>    | Bifunctional protein PutA                                                                                                            |
| 112 | 1241 | 0.04 | AOA0B5BIF0 | <i>Geobacter pickeringii</i>     | NADH-ubiquinone oxidoreductase subunit 3                                                                                             |
| 113 | 1237 | 0.04 | AOA0D5NDD6 | <i>Geobacter sulfurreducens</i>  | Type II secretion system protein E                                                                                                   |
| 114 | 1236 | 0.04 | Q39QJ5     | <i>Geobacter metallireducens</i> | Sensor histidine kinase CheA associated with MCPs of classes 40H and 40+24H                                                          |
| 115 | 1236 | 0.04 | Q39RM6     | <i>Geobacter metallireducens</i> | Glycosyltransferase                                                                                                                  |
| 116 | 1234 | 0.04 | Q39QJ8     | <i>Geobacter metallireducens</i> | Flagellar biogenesis master sigma-54-dependent transcriptional response regulator                                                    |
| 117 | 1232 | 0.04 | AOA0C1TL30 | <i>Geobacter soli</i>            | Flagellar basal body stator protein MotB                                                                                             |
| 118 | 1231 | 0.04 |            |                                  |                                                                                                                                      |
| 119 | 1224 | 0.04 | AOA0B5BC86 | <i>Geobacter pickeringii</i>     | Multicopper oxidase                                                                                                                  |
| 120 | 1224 | 0.04 | AOA0D5NE46 | <i>Geobacter sulfurreducens</i>  | Molecular chaperone DnaJ                                                                                                             |
| 121 | 1221 | 0.04 | Q39SI5     | <i>Geobacter metallireducens</i> | Fumarate hydratase class I (EC 4.2.1.2)                                                                                              |
| 122 | 1217 | 0.04 | Q39R25     | <i>Geobacter metallireducens</i> | Sensor diguanylate cyclase/phosphodiesterase, PAS, PAS and PAS domain-containing                                                     |
| 123 | 1203 | 0.04 | Q39UR9     | <i>Geobacter metallireducens</i> | Carbamoyl-phosphate synthase large chain (EC 6.3.5.5) (Carbamoyl-phosphate synthetase ammonia chain)                                 |
| 124 | 1202 | 0.04 | AOA0B5BD43 | <i>Geobacter pickeringii</i>     | ABC transporter permease                                                                                                             |

|     |      |      |            |                                  |                                                                                                                                          |
|-----|------|------|------------|----------------------------------|------------------------------------------------------------------------------------------------------------------------------------------|
| 125 | 1197 | 0.04 | A0A0B5BDG1 | <i>Geobacter pickeringii</i>     | tRNA uridine 5-carboxymethylaminomethyl modification enzyme MnmG (Glucose-inhibited division protein A)                                  |
| 126 | 1194 | 0.04 | A0A0B5BIQ7 | <i>Geobacter pickeringii</i>     | Flagellar basal-body rod protein FlgF (Flagellar hook protein FlgE)                                                                      |
| 127 | 1193 | 0.04 | P61679     | <i>Geobacter sulfurreducens</i>  | UDP-N-acetylmuramate--L-alanine ligase (EC 6.3.2.8) (UDP-N-acetylmuramoyl-L-alanine synthetase)                                          |
| 128 | 1192 | 0.04 | A0A0B5BCL9 | <i>Geobacter pickeringii</i>     | Uncharacterized protein                                                                                                                  |
| 129 | 1191 | 0.04 | A0A0B5BH05 | <i>Geobacter pickeringii</i>     | Malic enzyme (EC 1.1.1.40)                                                                                                               |
| 130 | 1187 | 0.04 | A0A0B5BK89 | <i>Geobacter pickeringii</i>     | FAD-binding protein                                                                                                                      |
| 131 | 1186 | 0.04 | A0A0B5BHV9 | <i>Geobacter pickeringii</i>     | ATPase AAA                                                                                                                               |
| 132 | 1186 | 0.04 | A0A0B5BK56 | <i>Geobacter pickeringii</i>     | Lon protease (EC 3.4.21.53) (ATP-dependent protease La)                                                                                  |
| 133 | 1186 | 0.04 | Q39WG2     | <i>Geobacter metallireducens</i> | Chromosome partition protein Smc                                                                                                         |
| 134 | 1186 | 0.04 | A5GAY2     | <i>Geobacter uraniireducens</i>  | DNA-directed RNA polymerase subunit beta' (RNAP subunit beta') (EC 2.7.7.6) (RNA polymerase subunit beta') (Transcriptase subunit beta') |
| 135 | 1183 | 0.04 | A0A0B5BIA1 | <i>Geobacter pickeringii</i>     | DNA-directed DNA polymerase (EC 2.7.7.7)                                                                                                 |
| 136 | 1178 | 0.04 | A5GF11     | <i>Geobacter uraniireducens</i>  | Acetyl-CoA carboxylase carboxyltransferase subunit alpha (EC 6.3.4.14)                                                                   |
| 137 | 1176 | 0.04 | Q39SJ2     | <i>Geobacter metallireducens</i> | Nitrogen fixation master sigma-54-dependent transcriptional response regulator                                                           |
| 138 | 1175 | 0.04 | A0A0B5BCZ8 | <i>Geobacter pickeringii</i>     | Succinate dehydrogenase (EC 1.3.5.1)                                                                                                     |
| 139 | 1175 | 0.04 | Q74F57     | <i>Geobacter sulfurreducens</i>  | Membrane protein, major facilitator superfamily                                                                                          |
| 140 | 1172 | 0.04 | A0A0A8WPS5 | <i>Geobacter sp.</i>             | Efflux pump membrane transporter                                                                                                         |
| 141 | 1171 | 0.04 | Q749N5     | <i>Geobacter sulfurreducens</i>  | Acetate kinase (EC 2.7.2.1) (Acetokinase)                                                                                                |
| 142 | 1168 | 0.04 | A0A0B5B668 | <i>Geobacter pickeringii</i>     | Peptidase U32                                                                                                                            |
| 143 | 1168 | 0.04 | Q39WR2     | <i>Geobacter metallireducens</i> | CRISPR-associated endonuclease Cas1 (EC 3.1.-.-)                                                                                         |
| 144 | 1167 | 0.04 | A0A0D5N400 | <i>Geobacter sulfurreducens</i>  | Uncharacterized protein                                                                                                                  |
| 145 | 1164 | 0.04 | Q74GY2     | <i>Geobacter sulfurreducens</i>  | ATP synthase subunit alpha (EC 3.6.3.14) (ATP synthase F1 sector subunit alpha) (F-ATPase subunit alpha)                                 |
| 146 | 1164 | 0.04 | A0A4W3     | <i>Geobacter sulfurreducens</i>  | Biosynthetic arginine decarboxylase (ADC) (EC 4.1.1.19)                                                                                  |
| 147 | 1164 | 0.04 |            |                                  |                                                                                                                                          |
| 148 | 1163 | 0.04 | A0A0B5BBC9 | <i>Geobacter pickeringii</i>     | Type I citrate synthase (EC 2.3.3.1)                                                                                                     |
| 149 | 1162 | 0.04 | Q74FW2     | <i>Geobacter sulfurreducens</i>  | Succinyl:acetate coenzyme A transferase                                                                                                  |
| 150 | 1160 | 0.04 | Q39QU2     | <i>Geobacter metallireducens</i> | Phosphoenolpyruvate carboxykinase (ATP) (PCK) (PEP carboxykinase) (PEPCK) (EC 4.1.1.49)                                                  |

|     |      |      |            |                                     |                                                                                                            |
|-----|------|------|------------|-------------------------------------|------------------------------------------------------------------------------------------------------------|
| 151 | 1153 | 0.04 | AOA0D5N711 | <i>Geobacter sulfurreducens</i>     | NADH-quinone oxidoreductase subunit N (EC 1.6.5.11) (NADH dehydrogenase I subunit N) (NDH-1 subunit N)     |
| 152 | 1150 | 0.04 | AOA0B5B9H5 | <i>Geobacter pickeringii</i>        | Uncharacterized protein                                                                                    |
| 153 | 1150 | 0.04 | Q748I6     | <i>Geobacter sulfurreducens</i>     | Metalloprotease domain protein, M6 family                                                                  |
| 154 | 1149 | 0.04 | Q74CR5     | <i>Geobacter sulfurreducens</i>     | Serine hydroxymethyltransferase (SHMT) (Serine methylase) (EC 2.1.2.1)                                     |
| 155 | 1149 | 0.04 | P61667     | <i>Geobacter sulfurreducens</i>     | DNA mismatch repair protein MutS                                                                           |
| 156 | 1145 | 0.04 | Q39U54     | <i>Geobacter metallireducens</i>    | Sensor histidine kinase cyclic nucleotide phosphodiesterase, GAF, GAF and HD-GYP-related domain-containing |
| 157 | 1144 | 0.04 | A5GDX4     | <i>Geobacter uraniiireducens</i>    | DNA gyrase subunit B (EC 5.99.1.3)                                                                         |
| 158 | 1143 | 0.04 | Q747G2     | <i>Geobacter sulfurreducens</i>     | Outer membrane channel OmpJ                                                                                |
| 159 | 1140 | 0.04 | Q39QP7     | <i>Geobacter metallireducens</i>    | Lon protease (EC 3.4.21.53) (ATP-dependent protease La)                                                    |
| 160 | 1138 | 0.04 | AOA0D5NCW1 | <i>Geobacter sulfurreducens</i>     | Histidine kinase                                                                                           |
| 161 | 1138 | 0.04 | Q39ZQ2     | <i>Geobacter metallireducens</i>    | Uncharacterized protein                                                                                    |
| 162 | 1136 | 0.04 | Q74GY0     | <i>Geobacter sulfurreducens</i>     | ATP synthase subunit beta (EC 3.6.3.14) (ATP synthase F1 sector subunit beta) (F-ATPase subunit beta)      |
| 163 | 1135 | 0.04 | AOA0B5BE38 | <i>Geobacter pickeringii</i>        | Transcription-repair-coupling factor (TRCF) (EC 3.6.4.-)                                                   |
| 164 | 1128 | 0.04 | B3EAX2     | <i>Geobacter lovleyi</i>            | Efflux transporter, RND family, MFP subunit                                                                |
| 165 | 1127 | 0.04 | AOA0D5N6Q1 | <i>Geobacter sulfurreducens</i>     | FeS-binding protein                                                                                        |
| 166 | 1126 | 0.04 | E1QK39     | <i>Desulfarculus baarsii</i>        | Helicase domain protein                                                                                    |
| 167 | 1126 | 0.04 | Q39PS2     | <i>Geobacter metallireducens</i>    | Transcription-repair-coupling factor (TRCF) (EC 3.6.4.-)                                                   |
| 168 | 1123 | 0.04 | Q39X91     | <i>Geobacter metallireducens</i>    | DNA topoisomerase 1 (EC 5.99.1.2) (DNA topoisomerase I)                                                    |
| 169 | 1122 | 0.04 | Q74GG6     | <i>Geobacter sulfurreducens</i>     | Chromosomal replication initiator protein DnaA                                                             |
| 170 | 1121 | 0.04 | AOA0D5NB12 | <i>Geobacter sulfurreducens</i>     | Aldehyde dehydrogenase                                                                                     |
| 171 | 1116 | 0.04 | A5GCN0     | <i>Geobacter uraniiireducens</i>    | Short chain amide porin                                                                                    |
| 172 | 1114 | 0.04 | Q39RQ5     | <i>Geobacter metallireducens</i>    | Chaperone protein ClpB                                                                                     |
| 173 | 1111 | 0.04 | Q39X99     | <i>Geobacter metallireducens</i>    | UDP-glucuronate 4-dehydrogenase, decarboxylating                                                           |
| 174 | 1109 | 0.04 | Q39W73     | <i>Geobacter metallireducens</i>    | 2-isopropylmalate synthase (EC 2.3.3.13) (Alpha-IPM synthase) (Alpha-isopropylmalate synthase)             |
| 175 | 1108 | 0.04 | A0LQ17     | <i>Syntrophobacter fumaroxidans</i> | Helicase domain protein                                                                                    |
| 176 | 1107 | 0.04 |            |                                     |                                                                                                            |

|     |      |      |            |                                     |                                                                                                                                                                                                                                    |
|-----|------|------|------------|-------------------------------------|------------------------------------------------------------------------------------------------------------------------------------------------------------------------------------------------------------------------------------|
| 177 | 1103 | 0.04 | B9M1Q4     | <i>Geobacter daltonii</i>           | Biotin-dependent acyl-CoA carboxylase, biotin carboxylase subunit                                                                                                                                                                  |
| 178 | 1102 | 0.04 | Q74C83     | <i>Geobacter sulfurreducens</i>     | ATP-dependent Clp protease ATP-binding subunit ClpX                                                                                                                                                                                |
| 179 | 1101 | 0.04 | A0A0D5N7N0 | <i>Geobacter sulfurreducens</i>     | Glutamate synthase                                                                                                                                                                                                                 |
| 180 | 1100 | 0.04 | A5G8I3     | <i>Geobacter uraniireducens</i>     | Chaperone protein ClpB                                                                                                                                                                                                             |
| 181 | 1099 | 0.04 | A0A1F9PUK4 | <i>Desulfuromonadales bacterium</i> | Methyltransferase (EC 2.1.1.-)                                                                                                                                                                                                     |
| 182 | 1099 | 0.04 | B9M5J7     | <i>Geobacter daltonii</i>           | CRISPR-associated protein Csd2                                                                                                                                                                                                     |
| 183 | 1098 | 0.04 | A0A1G0LEY2 | <i>Geobacteraceae bacterium</i>     | Uncharacterized protein                                                                                                                                                                                                            |
| 184 | 1097 | 0.04 | A0A0C1QTJ3 | <i>Geobacter soli</i>               | Hemolysin D                                                                                                                                                                                                                        |
| 185 | 1097 | 0.04 | Q74D18     | <i>Geobacter sulfurreducens</i>     | ABC transporter, ATP-binding protein                                                                                                                                                                                               |
| 186 | 1092 | 0.04 | A0A0D5N435 | <i>Geobacter sulfurreducens</i>     | Multidrug transporter                                                                                                                                                                                                              |
| 187 | 1088 | 0.04 | A0A0A8WNZ4 | <i>Geobacter sp.</i>                | DNA gyrase subunit A (EC 5.99.1.3)                                                                                                                                                                                                 |
| 188 | 1087 | 0.04 | B3EA98     | <i>Geobacter lovleyi</i>            | Transcriptional regulator, XRE family                                                                                                                                                                                              |
| 189 | 1085 | 0.04 | A0A0B5BCH1 | <i>Geobacter pickeringii</i>        | Hydrogenase 2 large subunit (EC 1.12.99.6)                                                                                                                                                                                         |
| 190 | 1081 | 0.04 | A0A0B5BB89 | <i>Geobacter pickeringii</i>        | Chromosome partition protein Smc                                                                                                                                                                                                   |
| 191 | 1081 | 0.04 | A0A0D5N952 | <i>Geobacter sulfurreducens</i>     | Flagellar motor switch protein FliG                                                                                                                                                                                                |
| 192 | 1077 | 0.04 | A1AN79     | <i>Pelobacter propionicus</i>       | Adenosylmethionine-8-amino-7-oxononanoate aminotransferase (EC 2.6.1.62) (7,8-diamino-pelargonic acid aminotransferase) (DAPA AT) (DAPA aminotransferase) (7,8-diaminononanoate synthase) (DANS) (Diaminopelargonic acid synthase) |
| 193 | 1073 | 0.04 | Q39QK7     | <i>Geobacter metallireducens</i>    | Outer membrane channel OmpJ                                                                                                                                                                                                        |
| 194 | 1073 | 0.04 | Q39YR4     | <i>Geobacter metallireducens</i>    | FtsK/SpoIIIE domain protein                                                                                                                                                                                                        |
| 195 | 1072 | 0.04 |            |                                     |                                                                                                                                                                                                                                    |
| 196 | 1064 | 0.04 | Q39RM7     | <i>Geobacter metallireducens</i>    | Glycosyltransferase                                                                                                                                                                                                                |
| 197 | 1064 | 0.04 |            |                                     |                                                                                                                                                                                                                                    |
| 198 | 1061 | 0.04 | A0A0D5N8X4 | <i>Geobacter sulfurreducens</i>     | Flagellar M-ring protein                                                                                                                                                                                                           |
| 199 | 1060 | 0.04 | A0A0C1TL33 | <i>Geobacter soli</i>               | Uncharacterized protein                                                                                                                                                                                                            |
| 200 | 1057 | 0.04 | Q39X64     | <i>Geobacter metallireducens</i>    | Cell shape-determining protein MreB                                                                                                                                                                                                |
| 201 | 1051 | 0.04 | Q74EQ2     | <i>Geobacter sulfurreducens</i>     | Aldehyde:ferredoxin oxidoreductase, tungsten-containing                                                                                                                                                                            |
| 202 | 1049 | 0.04 | A0A0D5N7M4 | <i>Geobacter sulfurreducens</i>     | Chemotaxis protein                                                                                                                                                                                                                 |

|     |      |      |            |                                  |                                                                                                                                                                                                                                   |
|-----|------|------|------------|----------------------------------|-----------------------------------------------------------------------------------------------------------------------------------------------------------------------------------------------------------------------------------|
| 203 | 1049 | 0.04 | A5G9A7     | <i>Geobacter uraniireducens</i>  | NADH dehydrogenase subunit M (EC 1.6.5.3)                                                                                                                                                                                         |
| 204 | 1049 | 0.04 | Q39XG6     | <i>Geobacter metallireducens</i> | Pyruvate carboxylase (EC 6.4.1.1)                                                                                                                                                                                                 |
| 205 | 1044 | 0.04 | A0A0B5B7G6 | <i>Geobacter pickeringii</i>     | Cytochrome C                                                                                                                                                                                                                      |
| 206 | 1041 | 0.04 | P60789     | <i>Geobacter sulfurreducens</i>  | Elongation factor 4 (EF-4) (EC 3.6.5.n1) (Ribosomal back-translocase LepA)                                                                                                                                                        |
| 207 | 1040 | 0.04 | AOR7X1     | <i>Pelobacter propionicus</i>    | Type III restriction enzyme, res subunit                                                                                                                                                                                          |
| 208 | 1036 | 0.04 | Q74EP9     | <i>Geobacter sulfurreducens</i>  | DNA-binding ATPase Uup                                                                                                                                                                                                            |
| 209 | 1035 | 0.04 | A0A0B5B8F2 | <i>Geobacter pickeringii</i>     | Sodium transporter                                                                                                                                                                                                                |
| 210 | 1032 | 0.04 | Q39Z79     | <i>Geobacter metallireducens</i> | Twitching motility pilus retraction ATPase                                                                                                                                                                                        |
| 211 | 1032 | 0.04 | Q74BT1     | <i>Geobacter sulfurreducens</i>  | Repeat-containing protein                                                                                                                                                                                                         |
| 212 | 1030 | 0.04 | Q39YH3     | <i>Geobacter metallireducens</i> | UDP-N-acetylglucosamine 4,6-dehydratase and UDP-2-acetamido-2,6-dideoxy-alpha-D-xylo-4-hexulose 5-epimerase                                                                                                                       |
| 213 | 1029 | 0.04 | A0A0B5BDE7 | <i>Geobacter pickeringii</i>     | Fis family transcriptional regulator                                                                                                                                                                                              |
| 214 | 1026 | 0.04 | Q39RI3     | <i>Geobacter metallireducens</i> | Sensor histidine kinase, HAMP domain-containing, 2 heme-binding sites                                                                                                                                                             |
| 215 | 1018 | 0.04 | A0A0B5BG19 | <i>Geobacter pickeringii</i>     | Lon protease (EC 3.4.21.53) (ATP-dependent protease La)                                                                                                                                                                           |
| 216 | 1017 | 0.04 | A0A0B5BKE7 | <i>Geobacter pickeringii</i>     | NADH-quinone oxidoreductase subunit N (EC 1.6.5.11) (NADH dehydrogenase I subunit N) (NDH-1 subunit N)                                                                                                                            |
| 217 | 1016 | 0.04 | Q74GT3     | <i>Geobacter sulfurreducens</i>  | LL-diaminopimelate aminotransferase (DAP-AT) (DAP-aminotransferase) (LL-DAP-aminotransferase) (EC 2.6.1.83)                                                                                                                       |
| 218 | 1015 | 0.04 | A5GAC6     | <i>Geobacter uraniireducens</i>  | FMN-dependent NADH-azoreductase (EC 1.7.-.-) (Azo-dye reductase) (FMN-dependent NADH-azo compound oxidoreductase)                                                                                                                 |
| 219 | 1014 | 0.04 | A0A0B5BGV8 | <i>Geobacter pickeringii</i>     | Zinc protease                                                                                                                                                                                                                     |
| 220 | 1014 | 0.04 | Q74C70     | <i>Geobacter sulfurreducens</i>  | Phosphoglucosamine mutase (EC 5.4.2.10)                                                                                                                                                                                           |
| 221 | 1013 | 0.04 | Q39W76     | <i>Geobacter metallireducens</i> | Ketol-acid reductoisomerase (NADP(+)) (KARI) (EC 1.1.1.86) (Acetohydroxy-acid isomero-reductase) (AHIR) (Alpha-keto-beta-hydroxylacyl reductoisomerase) (Ketol-acid reductoisomerase type 1) (Ketol-acid reductoisomerase type I) |
| 222 | 1011 | 0.03 | A0A0A8WRD3 | <i>Geobacter sp.</i>             | Putative ABC transporter ATP-binding protein YkpA                                                                                                                                                                                 |
| 223 | 1009 | 0.03 | A0A0B5BDW0 | <i>Geobacter pickeringii</i>     | Leucine--tRNA ligase (EC 6.1.1.4) (Leucyl-tRNA synthetase) (LeuRS)                                                                                                                                                                |
| 224 | 1008 | 0.03 | A0A1T4RGQ7 | <i>Geobacter thiogenes</i>       | NAD+---dinitrogen-reductase ADP-D-ribosyltransferase                                                                                                                                                                              |
| 225 | 1007 | 0.03 | A0A0B5BGY7 | <i>Geobacter pickeringii</i>     | Phosphoglucomutase                                                                                                                                                                                                                |
| 226 | 1006 | 0.03 | Q74DL9     | <i>Geobacter sulfurreducens</i>  | Transposase of ISGsu2, IS5 family                                                                                                                                                                                                 |



|     |      |      |            |                                     |                                                                                                              |
|-----|------|------|------------|-------------------------------------|--------------------------------------------------------------------------------------------------------------|
| 227 | 1005 | 0.03 | A0A0D5NAW4 | <i>Geobacter sulfurreducens</i>     | Cation transporter                                                                                           |
| 228 | 1001 | 0.03 | A0A0B5BG42 | <i>Geobacter pickeringii</i>        | Vitamin B12-dependent ribonucleotide reductase (EC 1.17.4.1)                                                 |
| 229 | 1000 | 0.03 | Q39QB3     | <i>Geobacter metallireducens</i>    | NADH dehydrogenase I, G subunit                                                                              |
| 230 | 998  | 0.03 | A0A0D5N949 | <i>Geobacter sulfurreducens</i>     | Response regulator                                                                                           |
| 231 | 995  | 0.03 | A0A0B5BB11 | <i>Geobacter pickeringii</i>        | Pyruvate carboxylase (EC 6.4.1.1)                                                                            |
| 232 | 994  | 0.03 | Q39QA3     | <i>Geobacter metallireducens</i>    | ATP synthase subunit a (ATP synthase F0 sector subunit a) (F-ATPase subunit 6)                               |
| 233 | 990  | 0.03 | A0A0B5BCB2 | <i>Geobacter pickeringii</i>        | Nitrogen fixation protein NifE                                                                               |
| 234 | 984  | 0.03 | A0A0B5BBZ4 | <i>Geobacter pickeringii</i>        | DNA polymerase I (EC 2.7.7.7)                                                                                |
| 235 | 983  | 0.03 | A0A0B5BE21 | <i>Geobacter pickeringii</i>        | Histidine kinase                                                                                             |
| 236 | 983  | 0.03 | Q39QY3     | <i>Geobacter metallireducens</i>    | Efflux pump, RND family, inner membrane protein                                                              |
| 237 | 982  | 0.03 | Q39ZL2     | <i>Geobacter metallireducens</i>    | TrkA domain protein                                                                                          |
| 238 | 980  | 0.03 | A0A1F9PXI1 | <i>Desulfuromonadales bacterium</i> | Cytosine-specific methyltransferase (EC 2.1.1.37)                                                            |
| 239 | 979  | 0.03 | Q74AJ5     | <i>Geobacter sulfurreducens</i>     | Glycoside hydrolase, family 57, DUF3536 domain-containing                                                    |
| 240 | 978  | 0.03 |            |                                     |                                                                                                              |
| 241 | 977  | 0.03 | Q39UA2     | <i>Geobacter metallireducens</i>    | Adenylosuccinate lyase (ASL) (EC 4.3.2.2) (Adenylosuccinase)                                                 |
| 242 | 971  | 0.03 | A0A0B5B8W1 | <i>Geobacter pickeringii</i>        | ATP-dependent zinc metalloprotease FtsH (EC 3.4.24.-)                                                        |
| 243 | 971  | 0.03 | A1AM25     | <i>Pelobacter propionicus</i>       | Squalene-hopene cyclase                                                                                      |
| 244 | 970  | 0.03 | A0A0B5B7K6 | <i>Geobacter pickeringii</i>        | Cytochrome C biogenesis protein ResC                                                                         |
| 245 | 970  | 0.03 | A0A1T4RHG8 | <i>Geobacter thiogenes</i>          | Iron complex outer membrane receptor protein                                                                 |
| 246 | 968  | 0.03 | A0A0C1TQJ7 | <i>Geobacter soli</i>               | Uncharacterized protein                                                                                      |
| 247 | 967  | 0.03 | B3EAB9     | <i>Geobacter lovleyi</i>            | 4Fe-4S ferredoxin, iron-sulfur binding domain protein                                                        |
| 248 | 966  | 0.03 | A0A0D5N5Y8 | <i>Geobacter sulfurreducens</i>     | Cell division protein FtsA                                                                                   |
| 249 | 965  | 0.03 | Q39ZI6     | <i>Geobacter metallireducens</i>    | DNA helicase (EC 3.6.4.12)                                                                                   |
| 250 | 963  | 0.03 | Q746T2     | <i>Geobacter sulfurreducens</i>     | NADH-quinone oxidoreductase subunit H 2 (EC 1.6.5.11) (NADH dehydrogenase I subunit H 2) (NDH-1 subunit H 2) |
| 251 | 960  | 0.03 | A0A0B5BDP4 | <i>Geobacter pickeringii</i>        | Polya polymerase                                                                                             |
| 252 | 959  | 0.03 | A0A0B5B8J3 | <i>Geobacter pickeringii</i>        | Rod shape-determining protein RodA                                                                           |

|     |     |      |            |                                  |                                                                                                                                                    |
|-----|-----|------|------------|----------------------------------|----------------------------------------------------------------------------------------------------------------------------------------------------|
| 253 | 953 | 0.03 | Q74BT7     | <i>Geobacter sulfurreducens</i>  | Sensor histidine kinase cyclic nucleotide phosphodiesterase, GAF, GAF and HD-GYP-related domain-containing                                         |
| 254 | 953 | 0.03 |            |                                  |                                                                                                                                                    |
| 255 | 949 | 0.03 | P61946     | <i>Geobacter sulfurreducens</i>  | S-adenosylmethionine synthase (AdoMet synthase) (EC 2.5.1.6) (MAT) (Methionine adenosyltransferase)                                                |
| 256 | 949 | 0.03 | Q74AF7     | <i>Geobacter sulfurreducens</i>  | Methyl viologen-reducing hydrogenase, large subunit                                                                                                |
| 257 | 948 | 0.03 | A0A0D5N8K2 | <i>Geobacter sulfurreducens</i>  | RND transporter                                                                                                                                    |
| 258 | 948 | 0.03 | Q39QT7     | <i>Geobacter metallireducens</i> | Cytochrome c                                                                                                                                       |
| 259 | 947 | 0.03 | Q39Y82     | <i>Geobacter metallireducens</i> | 5-methyltetrahydrofolate--homocysteine S-methyltransferase, cobalamin-dependent                                                                    |
| 260 | 941 | 0.03 | A1ANK6     | <i>Pelobacter propionicus</i>    | Peptidase C1A, papain                                                                                                                              |
| 261 | 938 | 0.03 | A0A1T4RTR1 | <i>Geobacter thiogenes</i>       | Iron complex outermembrane receptor protein                                                                                                        |
| 262 | 938 | 0.03 | Q39VY0     | <i>Geobacter metallireducens</i> | Malate dehydrogenase (EC 1.1.1.37)                                                                                                                 |
| 263 | 933 | 0.03 | A0A0B5BC52 | <i>Geobacter pickeringii</i>     | General secretion pathway protein GspD                                                                                                             |
| 264 | 932 | 0.03 | A0A0B5BH19 | <i>Geobacter pickeringii</i>     | Uncharacterized protein                                                                                                                            |
| 265 | 932 | 0.03 | B5EHY9     | <i>Geobacter bemidjensis</i>     | Uncharacterized protein                                                                                                                            |
| 266 | 931 | 0.03 | A0A0D5NAV3 | <i>Geobacter sulfurreducens</i>  | Peptidase S41                                                                                                                                      |
| 267 | 931 | 0.03 | B9LZR8     | <i>Geobacter daltonii</i>        | Succinyl:acetate coenzyme A transferase                                                                                                            |
| 268 | 930 | 0.03 | A0A0A8WV23 | <i>Geobacter sp.</i>             | Protein translocase subunit SecD                                                                                                                   |
| 269 | 930 | 0.03 | Q74AT0     | <i>Geobacter sulfurreducens</i>  | Lysine--tRNA ligase (EC 6.1.1.6) (Lysyl-tRNA synthetase) (LysRS)                                                                                   |
| 270 | 928 | 0.03 | A0A1G0LYB2 | <i>Geobacteraceae bacterium</i>  | Uncharacterized protein                                                                                                                            |
| 271 | 925 | 0.03 | A0A0B5B5Z5 | <i>Geobacter pickeringii</i>     | DNA polymerase III subunit beta (EC 2.7.7.7)                                                                                                       |
| 272 | 925 | 0.03 | A0A0B5BIX5 | <i>Geobacter pickeringii</i>     | DNA polymerase II                                                                                                                                  |
| 273 | 924 | 0.03 | Q748B3     | <i>Geobacter sulfurreducens</i>  | UDP-N-acetylglucosamine 1-carboxyvinyltransferase (EC 2.5.1.7) (Enoylpyruvate transferase) (UDP-N-acetylglucosamine enolpyruvyl transferase) (EPT) |
| 274 | 923 | 0.03 | A5GC25     | <i>Geobacter uraniireducens</i>  | Propionyl-CoA carboxylase (EC 6.4.1.3)                                                                                                             |
| 275 | 923 | 0.03 | Q74F32     | <i>Geobacter sulfurreducens</i>  | Periplasmically oriented, membrane-bound formate dehydrogenase, major subunit, selenocysteine-containing                                           |
| 276 | 921 | 0.03 | A0A0B5B822 | <i>Geobacter pickeringii</i>     | Formate dehydrogenase                                                                                                                              |
| 277 | 921 | 0.03 | A0A0B5BHJ9 | <i>Geobacter pickeringii</i>     | Chaperone protein HtpG (Heat shock protein HtpG) (High temperature protein G)                                                                      |

|     |     |      |            |                                  |                                                                                                                                                                                                                                                                                   |
|-----|-----|------|------------|----------------------------------|-----------------------------------------------------------------------------------------------------------------------------------------------------------------------------------------------------------------------------------------------------------------------------------|
| 278 | 921 | 0.03 |            |                                  |                                                                                                                                                                                                                                                                                   |
| 279 | 920 | 0.03 | AOA0B5BGU8 | <i>Geobacter pickeringii</i>     | Chemotaxis protein                                                                                                                                                                                                                                                                |
| 280 | 919 | 0.03 | AOA0B5B7W4 | <i>Geobacter pickeringii</i>     | Transporter                                                                                                                                                                                                                                                                       |
| 281 | 919 | 0.03 | AOA0B5BFT0 | <i>Geobacter pickeringii</i>     | Phosphoribosylformylglycinamide synthase subunit PurL (FGAM synthase) (EC 6.3.5.3) (Formylglycinamide ribonucleotide amidotransferase subunit II) (FGAR amidotransferase II) (FGAR-AT II) (Glutamine amidotransferase PurL) (Phosphoribosylformylglycinamide synthase subunit II) |
| 282 | 918 | 0.03 | AOA0B5BJV3 | <i>Geobacter pickeringii</i>     | ABC transporter substrate-binding protein                                                                                                                                                                                                                                         |
| 283 | 917 | 0.03 | AOA0B5BFH3 | <i>Geobacter pickeringii</i>     | Polyribonucleotide nucleotidyltransferase (EC 2.7.7.8) (Polynucleotide phosphorylase) (PNPase)                                                                                                                                                                                    |
| 284 | 917 | 0.03 | E1QK40     | <i>Desulfarculus baarsii</i>     | DNA-cytosine methyltransferase                                                                                                                                                                                                                                                    |
| 285 | 917 | 0.03 | Q74D56     | <i>Geobacter sulfurreducens</i>  | Aspartate--tRNA(Asp/Asn) ligase (EC 6.1.1.23) (Aspartyl-tRNA synthetase) (AspRS) (Non-discriminating aspartyl-tRNA synthetase) (ND-AspRS)                                                                                                                                         |
| 286 | 912 | 0.03 | B0L930     | <i>uncultured Geobacter sp.</i>  | Tuf (Fragment)                                                                                                                                                                                                                                                                    |
| 287 | 911 | 0.03 | AOA0D5N419 | <i>Geobacter sulfurreducens</i>  | Uncharacterized protein                                                                                                                                                                                                                                                           |
| 288 | 911 | 0.03 | Q74E27     | <i>Geobacter sulfurreducens</i>  | Ribonuclease Y (RNase Y) (EC 3.1.-.-)                                                                                                                                                                                                                                             |
| 289 | 909 | 0.03 | Q74GU4     | <i>Geobacter sulfurreducens</i>  | Acetylglutamate kinase (EC 2.7.2.8) (N-acetyl-L-glutamate 5-phosphotransferase) (NAG kinase) (NAGK)                                                                                                                                                                               |
| 290 | 906 | 0.03 | Q747L0     | <i>Geobacter sulfurreducens</i>  | Glycoside hydrolase, family 57                                                                                                                                                                                                                                                    |
| 291 | 905 | 0.03 | AOA0B5BGX4 | <i>Geobacter pickeringii</i>     | Stage II sporulation protein E                                                                                                                                                                                                                                                    |
| 292 | 903 | 0.03 | A5GE75     | <i>Geobacter uraniireducens</i>  | Heavy metal translocating P-type ATPase                                                                                                                                                                                                                                           |
| 293 | 903 | 0.03 |            |                                  |                                                                                                                                                                                                                                                                                   |
| 294 | 902 | 0.03 | AOA0D5N645 | <i>Geobacter sulfurreducens</i>  | Penicillin-binding protein                                                                                                                                                                                                                                                        |
| 295 | 900 | 0.03 | AOA0B5B6N9 | <i>Geobacter pickeringii</i>     | Alanine--tRNA ligase (EC 6.1.1.7) (Alanyl-tRNA synthetase) (AlaRS)                                                                                                                                                                                                                |
| 296 | 899 | 0.03 | AOA1G0N1F9 | <i>Geobacteraceae bacterium</i>  | Tellurium resistance protein TerC                                                                                                                                                                                                                                                 |
| 297 | 899 | 0.03 | Q749D7     | <i>Geobacter sulfurreducens</i>  | Nitrogenase molybdenum-iron cofactor biosynthesis protein NifEN                                                                                                                                                                                                                   |
| 298 | 899 | 0.03 | Q748Y3     | <i>Geobacter sulfurreducens</i>  | 50S ribosomal protein L1                                                                                                                                                                                                                                                          |
| 299 | 897 | 0.03 | Q746S4     | <i>Geobacter sulfurreducens</i>  | NADH-quinone oxidoreductase subunit B/C/D (EC 1.6.5.11) (NADH dehydrogenase I subunit B/C/D) (NDH-1 subunit B/C/D)                                                                                                                                                                |
| 300 | 895 | 0.03 | AOA1G0MT57 | <i>Geobacteraceae bacterium</i>  | Uncharacterized protein                                                                                                                                                                                                                                                           |
| 301 | 892 | 0.03 | Q39Y18     | <i>Geobacter metallireducens</i> | Transcription termination/antitermination protein NusG                                                                                                                                                                                                                            |

|     |     |      |            |                                  |                                                                                                                                                                                                                                                                                                                          |
|-----|-----|------|------------|----------------------------------|--------------------------------------------------------------------------------------------------------------------------------------------------------------------------------------------------------------------------------------------------------------------------------------------------------------------------|
| 302 | 891 | 0.03 | A0A0B5B942 | <i>Geobacter pickeringii</i>     | Bifunctional uridylyltransferase/uridylyl-removing enzyme (UTase/UR) (Bifunctional [protein-PII] modification enzyme) (Bifunctional nitrogen sensor protein) [Includes: [Protein-PII]-UMP uridylyl-removing enzyme (UR) (EC 3.1.4.-); [Protein-PII] uridylyltransferase (PII uridylyltransferase) (UTase) (EC 2.7.7.59)] |
| 303 | 891 | 0.03 | A0A0D5N4Y8 | <i>Geobacter sulfurreducens</i>  | Pilus assembly protein PilB                                                                                                                                                                                                                                                                                              |
| 304 | 890 | 0.03 | A5GDX5     | <i>Geobacter uraniireducens</i>  | DNA gyrase subunit A (EC 5.99.1.3)                                                                                                                                                                                                                                                                                       |
| 305 | 890 | 0.03 | Q39YP6     | <i>Geobacter metallireducens</i> | Histidinol-phosphate aminotransferase (EC 2.6.1.9) (Imidazole acetol-phosphate transaminase)                                                                                                                                                                                                                             |
| 306 | 890 | 0.03 | Q74H61     | <i>Geobacter sulfurreducens</i>  | Heat-inducible transcription repressor HrcA                                                                                                                                                                                                                                                                              |
| 307 | 889 | 0.03 |            |                                  |                                                                                                                                                                                                                                                                                                                          |
| 308 | 888 | 0.03 | A0A0B5BBF5 | <i>Geobacter pickeringii</i>     | Twin-arginine translocation pathway signal protein                                                                                                                                                                                                                                                                       |
| 309 | 888 | 0.03 | A0A0B5BJ17 | <i>Geobacter pickeringii</i>     | UvrABC system protein C (Protein UvrC) (Excinuclease ABC subunit C)                                                                                                                                                                                                                                                      |
| 310 | 888 | 0.03 | Q74AR7     | <i>Geobacter sulfurreducens</i>  | Membrane-associated metal-dependent phosphohydrolase, HDc domain-containing                                                                                                                                                                                                                                              |
| 311 | 886 | 0.03 | A0A0B5B792 | <i>Geobacter pickeringii</i>     | Flagellar biosynthesis protein FlhF                                                                                                                                                                                                                                                                                      |
| 312 | 886 | 0.03 | Q747D6     | <i>Geobacter sulfurreducens</i>  | Pyruvate kinase (EC 2.7.1.40)                                                                                                                                                                                                                                                                                            |
| 313 | 884 | 0.03 | Q74D04     | <i>Geobacter sulfurreducens</i>  | Threonine--tRNA ligase (EC 6.1.1.3) (Threonyl-tRNA synthetase) (ThrRS)                                                                                                                                                                                                                                                   |
| 314 | 883 | 0.03 | A0A0B5BFC0 | <i>Geobacter pickeringii</i>     | Ni/Fe hydrogenase                                                                                                                                                                                                                                                                                                        |
| 315 | 882 | 0.03 | A0A0B5BJA2 | <i>Geobacter pickeringii</i>     | RND transporter                                                                                                                                                                                                                                                                                                          |
| 316 | 879 | 0.03 | A0A0B5BI14 | <i>Geobacter pickeringii</i>     | GTPase Der (GTP-binding protein EngA)                                                                                                                                                                                                                                                                                    |
| 317 | 878 | 0.03 | A0A0A8WYA5 | <i>Geobacter sp.</i>             | DNA-directed RNA polymerase subunit beta' (RNAP subunit beta') (EC 2.7.7.6) (RNA polymerase subunit beta') (Transcriptase subunit beta')                                                                                                                                                                                 |
| 318 | 876 | 0.03 |            |                                  |                                                                                                                                                                                                                                                                                                                          |
| 319 | 875 | 0.03 | B9M149     | <i>Geobacter daltonii</i>        | Translation-regulating membrane GTPase TypA                                                                                                                                                                                                                                                                              |
| 320 | 875 | 0.03 | B9M4C2     | <i>Geobacter daltonii</i>        | Squalene cyclase                                                                                                                                                                                                                                                                                                         |
| 321 | 875 | 0.03 | Q39RM2     | <i>Geobacter metallireducens</i> | Glycosyltransferase                                                                                                                                                                                                                                                                                                      |
| 322 | 875 | 0.03 | Q39UG5     | <i>Geobacter metallireducens</i> | Aspartokinase (EC 2.7.2.4)                                                                                                                                                                                                                                                                                               |
| 323 | 872 | 0.03 | A0A0D5N7Y6 | <i>Geobacter sulfurreducens</i>  | Chemotaxis protein CheA                                                                                                                                                                                                                                                                                                  |
| 324 | 870 | 0.03 | A5G3L3     | <i>Geobacter uraniireducens</i>  | Isocitrate dehydrogenase, NADP-dependent (EC 1.1.1.42)                                                                                                                                                                                                                                                                   |
| 325 | 870 | 0.03 | Q39WZ1     | <i>Geobacter metallireducens</i> | Nitrogen fixation protein NifU                                                                                                                                                                                                                                                                                           |

|     |     |      |            |                                  |                                                                                                                                                                                                                                                                                                                          |
|-----|-----|------|------------|----------------------------------|--------------------------------------------------------------------------------------------------------------------------------------------------------------------------------------------------------------------------------------------------------------------------------------------------------------------------|
| 326 | 868 | 0.03 | A0A0B5B8X9 | <i>Geobacter pickeringii</i>     | Phosphoenolpyruvate-protein phosphotransferase (EC 2.7.3.9) (Phosphotransferase system, enzyme I)                                                                                                                                                                                                                        |
| 327 | 868 | 0.03 | Q39UH4     | <i>Geobacter metallireducens</i> | Lon protease (EC 3.4.21.53) (ATP-dependent protease La)                                                                                                                                                                                                                                                                  |
| 328 | 868 | 0.03 | Q39VA8     | <i>Geobacter metallireducens</i> | Transcription termination/antitermination protein NusA                                                                                                                                                                                                                                                                   |
| 329 | 866 | 0.03 | A0A0B5BJM3 | <i>Geobacter pickeringii</i>     | NADH-ubiquinone oxidoreductase subunit 3                                                                                                                                                                                                                                                                                 |
| 330 | 866 | 0.03 | Q39VY8     | <i>Geobacter metallireducens</i> | Glutamine synthetase (EC 6.3.1.2)                                                                                                                                                                                                                                                                                        |
| 331 | 865 | 0.03 | A0A0B5B6P6 | <i>Geobacter pickeringii</i>     | Histidine kinase                                                                                                                                                                                                                                                                                                         |
| 332 | 865 | 0.03 | A0A0D5N8X6 | <i>Geobacter sulfurreducens</i>  | Chemotaxis protein                                                                                                                                                                                                                                                                                                       |
| 333 | 864 | 0.03 | A0A0B5BB86 | <i>Geobacter pickeringii</i>     | Uncharacterized protein                                                                                                                                                                                                                                                                                                  |
| 334 | 864 | 0.03 | A0A0D5N2Y9 | <i>Geobacter sulfurreducens</i>  | Diguanylate cyclase                                                                                                                                                                                                                                                                                                      |
| 335 | 864 | 0.03 | Q39Q79     | <i>Geobacter metallireducens</i> | Winged-helix transcriptional response regulator                                                                                                                                                                                                                                                                          |
| 336 | 864 | 0.03 | Q39ZP3     | <i>Geobacter metallireducens</i> | VWFA superfamily protein                                                                                                                                                                                                                                                                                                 |
| 337 | 862 | 0.03 | A0A0B5BIU4 | <i>Geobacter pickeringii</i>     | Probable glycine dehydrogenase (decarboxylating) subunit 1 (EC 1.4.4.2) (Glycine cleavage system P-protein subunit 1) (Glycine decarboxylase subunit 1) (Glycine dehydrogenase (aminomethyl-transferring) subunit 1)                                                                                                     |
| 338 | 859 | 0.03 | Q74GF2     | <i>Geobacter sulfurreducens</i>  | Metal-dependent phosphohydrolase, HDOD domain-containing                                                                                                                                                                                                                                                                 |
| 339 | 858 | 0.03 | A0A0D5N3S3 | <i>Geobacter sulfurreducens</i>  | Chemotaxis protein CheY                                                                                                                                                                                                                                                                                                  |
| 340 | 858 | 0.03 | Q39RK5     | <i>Geobacter metallireducens</i> | ResB-like family cytochrome c                                                                                                                                                                                                                                                                                            |
| 341 | 855 | 0.03 | A0A0B5BIW8 | <i>Geobacter pickeringii</i>     | Aminotransferase                                                                                                                                                                                                                                                                                                         |
| 342 | 854 | 0.03 | B3EAZ5     | <i>Geobacter lovleyi</i>         | TraG family protein                                                                                                                                                                                                                                                                                                      |
| 343 | 853 | 0.03 | Q74D76     | <i>Geobacter sulfurreducens</i>  | Histidine kinase (EC 2.7.13.3)                                                                                                                                                                                                                                                                                           |
| 344 | 848 | 0.03 | A0A1G1FB69 | <i>Nitrospirae bacterium</i>     | Uncharacterized protein                                                                                                                                                                                                                                                                                                  |
| 345 | 848 | 0.03 | Q39VR4     | <i>Geobacter metallireducens</i> | Bifunctional uridylyltransferase/uridylyl-removing enzyme (UTase/UR) (Bifunctional [protein-PII] modification enzyme) (Bifunctional nitrogen sensor protein) [Includes: [Protein-PII]-UMP uridylyl-removing enzyme (UR) (EC 3.1.4.-); [Protein-PII] uridylyltransferase (PII uridylyltransferase) (UTase) (EC 2.7.7.59)] |
| 346 | 846 | 0.03 | B3E8C0     | <i>Geobacter lovleyi</i>         | Iron-containing alcohol dehydrogenase                                                                                                                                                                                                                                                                                    |
| 347 | 846 | 0.03 | Q74D19     | <i>Geobacter sulfurreducens</i>  | Uncharacterized protein                                                                                                                                                                                                                                                                                                  |
| 348 | 845 | 0.03 | A0A1G0N2A8 | <i>Geobacteraceae bacterium</i>  | Thiol:disulfide interchange protein                                                                                                                                                                                                                                                                                      |
| 349 | 845 | 0.03 | A5G8W9     | <i>Geobacter uraniiireducens</i> | Flagellar hook-associated protein 2 (HAP2) (Flagellar cap protein)                                                                                                                                                                                                                                                       |

|     |     |      |            |                                     |                                                                                                 |
|-----|-----|------|------------|-------------------------------------|-------------------------------------------------------------------------------------------------|
| 350 | 843 | 0.03 | Q39VA6     | <i>Geobacter metallireducens</i>    | Translation initiation factor IF-2                                                              |
| 351 | 843 | 0.03 | Q30VS6     | <i>Desulfovibrio alaskensis</i>     | Site-specific DNA-methyltransferase (Adenine-specific) (EC 2.1.1.72)                            |
| 352 | 842 | 0.03 | A0A0B5BHW3 | <i>Geobacter pickeringii</i>        | Ammonium transporter                                                                            |
| 353 | 841 | 0.03 | A0A0D5N2S0 | <i>Geobacter sulfurreducens</i>     | Uncharacterized protein                                                                         |
| 354 | 841 | 0.03 | A0A1F9P4Q4 | <i>Desulfuromonadales bacterium</i> | Uncharacterized protein                                                                         |
| 355 | 841 | 0.03 | Q39XC1     | <i>Geobacter metallireducens</i>    | PilB/PulE/GspE family ATPase                                                                    |
| 356 | 841 | 0.03 | Q39Z54     | <i>Geobacter metallireducens</i>    | Membrane protein, putative                                                                      |
| 357 | 840 | 0.03 | A0A0B5BCR8 | <i>Geobacter pickeringii</i>        | Alpha-1,4 glucan phosphorylase (EC 2.4.1.1)                                                     |
| 358 | 839 | 0.03 | Q39XL2     | <i>Geobacter metallireducens</i>    | Phosphoenolpyruvate synthase (PEP synthase) (EC 2.7.9.2) (Pyruvate, water dikinase)             |
| 359 | 838 | 0.03 | A0A0B5BK21 | <i>Geobacter pickeringii</i>        | Inner membrane cytochrome H                                                                     |
| 360 | 837 | 0.03 | A0A0D5NDV9 | <i>Geobacter sulfurreducens</i>     | HD family phosphohydrolase                                                                      |
| 361 | 837 | 0.03 | Q74BQ5     | <i>Geobacter sulfurreducens</i>     | Undecaprenyl-phosphate glycosylphosphotransferase                                               |
| 362 | 836 | 0.03 | Q39X31     | <i>Geobacter metallireducens</i>    | Protein translocase subunit SecA                                                                |
| 363 | 835 | 0.03 | Q747G4     | <i>Geobacter sulfurreducens</i>     | (R)-methylmalonyl-CoA mutase, isobutyryl-CoA mutase-like catalytic subunit                      |
| 364 | 834 | 0.03 | A0A0B5BIH3 | <i>Geobacter pickeringii</i>        | Uncharacterized protein                                                                         |
| 365 | 834 | 0.03 | Q74A32     | <i>Geobacter sulfurreducens</i>     | PppGpp 5'-phosphohydrolase and exopolyphosphatase, HD domain-containing                         |
| 366 | 833 | 0.03 | A0A0B5B672 | <i>Geobacter pickeringii</i>        | FeS-binding protein                                                                             |
| 367 | 833 | 0.03 | C6DZ95     | <i>Geobacter sp.</i>                | Lytic transglycosylase catalytic                                                                |
| 368 | 829 | 0.03 | B9M5J8     | <i>Geobacter daltonii</i>           | CRISPR-associated protein Csd1                                                                  |
| 369 | 828 | 0.03 | Q39X71     | <i>Geobacter metallireducens</i>    | Uncharacterized protein                                                                         |
| 370 | 828 | 0.03 | Q74FM8     | <i>Geobacter sulfurreducens</i>     | Glycine--tRNA ligase alpha subunit (EC 6.1.1.14) (Glycyl-tRNA synthetase alpha subunit) (GlyRS) |
| 371 | 827 | 0.03 | P60401     | <i>Geobacter sulfurreducens</i>     | 50S ribosomal protein L2                                                                        |
| 372 | 826 | 0.03 | A0A0B5BBV1 | <i>Geobacter pickeringii</i>        | Cytochrome C                                                                                    |
| 373 | 825 | 0.03 | A0A0B5B7V2 | <i>Geobacter pickeringii</i>        | Ribosome-binding ATPase YchF                                                                    |
| 374 | 824 | 0.03 | P61523     | <i>Geobacter sulfurreducens</i>     | Argininosuccinate synthase (EC 6.3.4.5) (Citrulline--aspartate ligase)                          |
| 375 | 823 | 0.03 | Q74D63     | <i>Geobacter sulfurreducens</i>     | Uncharacterized protein                                                                         |
| 376 | 821 | 0.03 | A0A0B5BD26 | <i>Geobacter pickeringii</i>        | CDP-diacylglycerol--serine O-phosphatidyltransferase                                            |

|     |     |      |            |                                  |                                                                                          |
|-----|-----|------|------------|----------------------------------|------------------------------------------------------------------------------------------|
| 377 | 821 | 0.03 | AOA0B5BDG8 | <i>Geobacter pickeringii</i>     | ABC transporter ATP-binding protein                                                      |
| 378 | 820 | 0.03 | Q748T0     | <i>Geobacter sulfurreducens</i>  | 5-methyltetrahydrofolate--homocysteine S-methyltransferase, cobalamin-dependent          |
| 379 | 815 | 0.03 | AOA0C1TS26 | <i>Geobacter soli</i>            | L-aspartate oxidase (EC 1.4.3.16)                                                        |
| 380 | 815 | 0.03 | Q748X2     | <i>Geobacter sulfurreducens</i>  | 3-isopropylmalate dehydrogenase (EC 1.1.1.85) (3-IPM-DH) (Beta-IPM dehydrogenase) (IMDH) |
| 381 | 814 | 0.03 | AOA0B5BEL7 | <i>Geobacter pickeringii</i>     | Cytochrome C                                                                             |
| 382 | 814 | 0.03 | AOA0B5BK07 | <i>Geobacter pickeringii</i>     | Histidine kinase                                                                         |
| 383 | 814 | 0.03 | AOA0D5N8L0 | <i>Geobacter sulfurreducens</i>  | ATP-dependent protease                                                                   |
| 384 | 814 | 0.03 | A5G9T7     | <i>Geobacter uraniireducens</i>  | Peptide chain release factor 3 (RF-3)                                                    |
| 385 | 813 | 0.03 | AOA174BLS6 | <i>Mitsuokella jalaludinii</i>   | DNA topoisomerase 3 (EC 5.99.1.2)                                                        |
| 386 | 813 | 0.03 | Q39PY9     | <i>Geobacter metallireducens</i> | Histidine kinase (EC 2.7.13.3)                                                           |
| 387 | 811 | 0.03 | AOA0A8WQH6 | <i>Geobacter sp.</i>             | Uncharacterized protein                                                                  |
| 388 | 810 | 0.03 | B9M7P3     | <i>Geobacter daltonii</i>        | UvrABC system protein A (UvrA protein) (Excinuclease ABC subunit A)                      |
| 389 | 807 | 0.03 | AOA0D5N5H4 | <i>Geobacter sulfurreducens</i>  | Cell division protein FtsK                                                               |
| 390 | 805 | 0.03 | AOA0B5B9N3 | <i>Geobacter pickeringii</i>     | 3-oxoacyl-[acyl-carrier-protein] synthase 2 (EC 2.3.1.179)                               |
| 391 | 805 | 0.03 | AOA0D5N8I2 | <i>Geobacter sulfurreducens</i>  | Histidine kinase                                                                         |
| 392 | 803 | 0.03 | B3EA94     | <i>Geobacter lovleyi</i>         | Uncharacterized protein                                                                  |
| 393 | 803 | 0.03 | Q748A7     | <i>Geobacter sulfurreducens</i>  | Transcription termination factor Rho (EC 3.6.4.-) (ATP-dependent helicase Rho)           |
| 394 | 803 | 0.03 | Q74CQ3     | <i>Geobacter sulfurreducens</i>  | Uncharacterized protein                                                                  |
| 395 | 802 | 0.03 | AOA0D5N4L7 | <i>Geobacter sulfurreducens</i>  | Outer membrane protein assembly factor BamA                                              |
| 396 | 801 | 0.03 | AOA0B5BBX6 | <i>Geobacter pickeringii</i>     | Ribonuclease E (RNase E) (EC 3.1.26.12)                                                  |
| 397 | 800 | 0.03 | AOA0B5B9Q9 | <i>Geobacter pickeringii</i>     | Glycosyl transferase                                                                     |
| 398 | 800 | 0.03 | AOA0S8I0Q8 | <i>bacterium SM23_31</i>         | Uncharacterized protein                                                                  |
| 399 | 799 | 0.03 | P60859     | <i>Geobacter sulfurreducens</i>  | Histidinol dehydrogenase (HDH) (EC 1.1.1.23)                                             |
| 400 | 798 | 0.03 | AOA0B5BBH7 | <i>Geobacter pickeringii</i>     | Endopeptidase La (EC 3.4.21.53)                                                          |
| 401 | 798 | 0.03 | Q39YS7     | <i>Geobacter metallireducens</i> | Peptidoglycan transglycosylase and transpeptidase MrcA                                   |
| 402 | 796 | 0.03 | AOA0B5BLL1 | <i>Geobacter pickeringii</i>     | Pyridine nucleotide-disulfide oxidoreductase                                             |
| 403 | 796 | 0.03 | AOA0C1U294 | <i>Geobacter soli</i>            | Pilus assembly protein PilQ                                                              |

|     |     |      |            |                                  |                                                                                                |
|-----|-----|------|------------|----------------------------------|------------------------------------------------------------------------------------------------|
| 404 | 795 | 0.03 | Q39UW3     | <i>Geobacter metallireducens</i> | Succinyl:acetate coenzyme A transferase                                                        |
| 405 | 794 | 0.03 | Q39VU9     | <i>Geobacter metallireducens</i> | Polyprenyl-phospho-glycoside--protein O-glycosyltransferase DUF2723 membrane protein, putative |
| 406 | 792 | 0.03 | A0A0D5N732 | <i>Geobacter sulfurreducens</i>  | Transcription-repair-coupling factor (TRCF) (EC 3.6.4.-)                                       |
| 407 | 792 | 0.03 | A0A1G0LE89 | <i>Geobacteraceae bacterium</i>  | Aconitate hydratase (Aconitase) (EC 4.2.1.3)                                                   |
| 408 | 789 | 0.03 | Q74GK2     | <i>Geobacter sulfurreducens</i>  | Radical SAM domain iron-sulfur cluster-binding oxidoreductase                                  |
| 409 | 787 | 0.03 | A0A0B5BE23 | <i>Geobacter pickeringii</i>     | Uncharacterized protein                                                                        |
| 410 | 786 | 0.03 | A0A0B5BIT5 | <i>Geobacter pickeringii</i>     | Diadenylate cyclase (DAC) (EC 2.7.7.85) (Cyclic-di-AMP synthase) (c-di-AMP synthase)           |
| 411 | 786 | 0.03 | Q39U98     | <i>Geobacter metallireducens</i> | Phosphoglycerate kinase (EC 2.7.2.3)                                                           |
| 412 | 786 | 0.03 | Q39T98     | <i>Geobacter metallireducens</i> | Cytochrome c                                                                                   |
| 413 | 785 | 0.03 | A0A0B5B8X8 | <i>Geobacter pickeringii</i>     | Pilus assembly protein PilB                                                                    |
| 414 | 785 | 0.03 | B5E8R5     | <i>Geobacter bemidjensis</i>     | Glutamine synthetase (EC 6.3.1.2)                                                              |
| 415 | 784 | 0.03 | A0A0D5N9G3 | <i>Geobacter sulfurreducens</i>  | Multidrug ABC transporter substrate-binding protein                                            |
| 416 | 781 | 0.03 | A0A0B5B7W3 | <i>Geobacter pickeringii</i>     | Squalene cyclase                                                                               |
| 417 | 781 | 0.03 | Q39RT7     | <i>Geobacter metallireducens</i> | Efflux pump, RND superfamily, and rRNA methyltransferase, putative                             |
| 418 | 780 | 0.03 | Q39QN4     | <i>Geobacter metallireducens</i> | Pentapeptide repeat protein                                                                    |
| 419 | 780 | 0.03 | Q74GB8     | <i>Geobacter sulfurreducens</i>  | Type II secretion system ATPase GspE                                                           |
| 420 | 779 | 0.03 | A0A0C1TRW2 | <i>Geobacter soli</i>            | Fibronectin                                                                                    |
| 421 | 779 | 0.03 | Q748T9     | <i>Geobacter sulfurreducens</i>  | Cytochrome c                                                                                   |
| 422 | 778 | 0.03 | A0A0B5BE51 | <i>Geobacter pickeringii</i>     | DNA replication and repair protein RecF                                                        |
| 423 | 778 | 0.03 | Q39W43     | <i>Geobacter metallireducens</i> | Oligoendopeptidase F                                                                           |
| 424 | 778 | 0.03 |            |                                  |                                                                                                |
| 425 | 777 | 0.03 | A0A0D5N4I0 | <i>Geobacter sulfurreducens</i>  | Chemotaxis protein                                                                             |
| 426 | 777 | 0.03 | Q747K3     | <i>Geobacter sulfurreducens</i>  | UvrABC system protein B (Protein UvrB) (Excinuclease ABC subunit B)                            |
| 427 | 776 | 0.03 | A5GC26     | <i>Geobacter uraniireducens</i>  | Biotin/lipoyl attachment domain-containing protein                                             |
| 428 | 776 | 0.03 | Q39XB5     | <i>Geobacter metallireducens</i> | 30S ribosomal protein S1                                                                       |
| 429 | 776 | 0.03 | Q74BT6     | <i>Geobacter sulfurreducens</i>  | Sigma-54-dependent transcriptional response regulator                                          |



|     |     |      |            |                                          |                                                                                                                                                                                                                                                                                                                       |
|-----|-----|------|------------|------------------------------------------|-----------------------------------------------------------------------------------------------------------------------------------------------------------------------------------------------------------------------------------------------------------------------------------------------------------------------|
| 430 | 776 | 0.03 | W6LX92     | <i>Candidatus Contendobacter odensis</i> | Putative Lipoprotein                                                                                                                                                                                                                                                                                                  |
| 431 | 774 | 0.03 | A0A0B5BCX9 | <i>Geobacter pickeringii</i>             | Flagellar motor protein MotA                                                                                                                                                                                                                                                                                          |
| 432 | 772 | 0.03 | A0A0B5BCP9 | <i>Geobacter pickeringii</i>             | Uncharacterized protein                                                                                                                                                                                                                                                                                               |
| 433 | 772 | 0.03 | A0A0B5BI05 | <i>Geobacter pickeringii</i>             | Dihydrolipoamide acetyltransferase component of pyruvate dehydrogenase complex (EC 2.3.1.-)                                                                                                                                                                                                                           |
| 434 | 772 | 0.03 | Q39VY3     | <i>Geobacter metallireducens</i>         | Aspartate--tRNA(Asp/Asn) ligase (EC 6.1.1.23) (Aspartyl-tRNA synthetase) (AspRS) (Non-discriminating aspartyl-tRNA synthetase) (ND-AspRS)                                                                                                                                                                             |
| 435 | 771 | 0.03 | A0A0A8WN28 | <i>Geobacter sp.</i>                     | Protein TraN                                                                                                                                                                                                                                                                                                          |
| 436 | 771 | 0.03 | Q74BG6     | <i>Geobacter sulfurreducens</i>          | Serine protease, subtilase family                                                                                                                                                                                                                                                                                     |
| 437 | 769 | 0.03 | A0A0B5BFN3 | <i>Geobacter pickeringii</i>             | Bifunctional protein HldE [Includes: D-beta-D-heptose 1-phosphate adenylyltransferase (EC 2.7.7.70) (D-glycero-beta-D-manno-heptose 1-phosphate adenylyltransferase); D-beta-D-heptose 7-phosphate kinase (EC 2.7.1.167) (D-beta-D-heptose 7-phosphotransferase) (D-glycero-beta-D-manno-heptose-7-phosphate kinase)] |
| 438 | 769 | 0.03 | B3EB58     | <i>Geobacter lovleyi</i>                 | Uncharacterized protein                                                                                                                                                                                                                                                                                               |
| 439 | 767 | 0.03 | Q74H55     | <i>Geobacter sulfurreducens</i>          | Serine--tRNA ligase (EC 6.1.1.11) (Seryl-tRNA synthetase) (SerRS) (Seryl-tRNA(Ser/Sec) synthetase)                                                                                                                                                                                                                    |
| 440 | 766 | 0.03 | A0A133XMR2 | <i>Dechloromonas denitrificans</i>       | Type I restriction endonuclease subunit M                                                                                                                                                                                                                                                                             |
| 441 | 766 | 0.03 |            |                                          |                                                                                                                                                                                                                                                                                                                       |
| 442 | 765 | 0.03 | Q39US2     | <i>Geobacter metallireducens</i>         | Carbamoyl-phosphate synthase small chain (EC 6.3.5.5) (Carbamoyl-phosphate synthetase glutamine chain)                                                                                                                                                                                                                |
| 443 | 764 | 0.03 | A0A0D5N7J7 | <i>Geobacter sulfurreducens</i>          | Alpha-glucan phosphorylase                                                                                                                                                                                                                                                                                            |
| 444 | 763 | 0.03 | A0A0B5BDH6 | <i>Geobacter pickeringii</i>             | Membrane protein                                                                                                                                                                                                                                                                                                      |
| 445 | 763 | 0.03 | A0A0B5BJ50 | <i>Geobacter pickeringii</i>             | Chemotaxis protein CheA                                                                                                                                                                                                                                                                                               |
| 446 | 763 | 0.03 | Q39VA1     | <i>Geobacter metallireducens</i>         | Polyribonucleotide nucleotidyltransferase (EC 2.7.7.8) (Polynucleotide phosphorylase) (PNPase)                                                                                                                                                                                                                        |
| 447 | 763 | 0.03 | Q39QK5     | <i>Geobacter metallireducens</i>         | Uncharacterized protein                                                                                                                                                                                                                                                                                               |
| 448 | 762 | 0.03 | A0A0B5BD51 | <i>Geobacter pickeringii</i>             | Uncharacterized protein                                                                                                                                                                                                                                                                                               |
| 449 | 761 | 0.03 | A0A0D5NCI9 | <i>Geobacter sulfurreducens</i>          | GTPase-activating protein                                                                                                                                                                                                                                                                                             |
| 450 | 759 | 0.03 | Q747E4     | <i>Geobacter sulfurreducens</i>          | Polyphosphate kinase (EC 2.7.4.1) (ATP-polyphosphate phosphotransferase) (Polyphosphoric acid kinase)                                                                                                                                                                                                                 |
| 451 | 757 | 0.03 | A0A0A8WMQ9 | <i>Geobacter sp.</i>                     | Uncharacterized protein                                                                                                                                                                                                                                                                                               |
| 452 | 757 | 0.03 | A5G661     | <i>Geobacter uraniireducens</i>          | Uncharacterized protein                                                                                                                                                                                                                                                                                               |
| 453 | 756 | 0.03 | Q748Y7     | <i>Geobacter sulfurreducens</i>          | 30S ribosomal protein S7                                                                                                                                                                                                                                                                                              |

|     |     |      |            |                                     |                                                                                                                                                                                                            |
|-----|-----|------|------------|-------------------------------------|------------------------------------------------------------------------------------------------------------------------------------------------------------------------------------------------------------|
| 454 | 754 | 0.03 | AOA0D5N2Y8 | <i>Geobacter sulfurreducens</i>     | Pyridine nucleotide-disulfide oxidoreductase                                                                                                                                                               |
| 455 | 753 | 0.03 | AOA0D5N9L3 | <i>Geobacter sulfurreducens</i>     | Uncharacterized protein                                                                                                                                                                                    |
| 456 | 753 | 0.03 | AOA1F9PKR5 | <i>Desulfuromonadales bacterium</i> | Uncharacterized protein                                                                                                                                                                                    |
| 457 | 752 | 0.03 | Q39XT7     | <i>Geobacter metallireducens</i>    | Ammonium transporter                                                                                                                                                                                       |
| 458 | 751 | 0.03 | AOA0D5N627 | <i>Geobacter sulfurreducens</i>     | SpoVR family protein                                                                                                                                                                                       |
| 459 | 751 | 0.03 | AOA1G0N3T4 | <i>Geobacteraceae bacterium</i>     | Hydroxylamine reductase (EC 1.7.99.1) (Hybrid-cluster protein) (HCP) (Prismane protein)                                                                                                                    |
| 460 | 751 | 0.03 | Q39WW8     | <i>Geobacter metallireducens</i>    | Periplasmic serine endoprotease DegP-like (EC 3.4.21.107)                                                                                                                                                  |
| 461 | 749 | 0.03 | Q39Q96     | <i>Geobacter metallireducens</i>    | Type II secretion system inner membrane protein GspF                                                                                                                                                       |
| 462 | 749 | 0.03 | Q748Q9     | <i>Geobacter sulfurreducens</i>     | Methyl-accepting chemotaxis sensory transducer, class 40H                                                                                                                                                  |
| 463 | 748 | 0.03 | AOA0A8WW30 | <i>Geobacter sp.</i>                | DNA-directed RNA polymerase subunit beta (RNAP subunit beta) (EC 2.7.7.6) (RNA polymerase subunit beta) (Transcriptase subunit beta)                                                                       |
| 464 | 748 | 0.03 | Q74BF0     | <i>Geobacter sulfurreducens</i>     | Phosphoribosylaminoimidazole-succinocarboxamide synthase (EC 6.3.2.6) (SAICAR synthetase)                                                                                                                  |
| 465 | 748 | 0.03 | Q39T78     | <i>Geobacter metallireducens</i>    | Methionine--tRNA ligase (EC 6.1.1.10) (Methionyl-tRNA synthetase) (MetRS)                                                                                                                                  |
| 466 | 748 | 0.03 | Q74F34     | <i>Geobacter sulfurreducens</i>     | Sensor histidine kinase, HAMP domain-containing                                                                                                                                                            |
| 467 | 747 | 0.03 | Q74DB6     | <i>Geobacter sulfurreducens</i>     | DNA-directed DNA polymerase (EC 2.7.7.7)                                                                                                                                                                   |
| 468 | 746 | 0.03 | K1YAK3     | <i>groundwater metagenome</i>       | Uncharacterized protein (Fragment)                                                                                                                                                                         |
| 469 | 746 | 0.03 |            |                                     |                                                                                                                                                                                                            |
| 470 | 745 | 0.03 | AOA0B5BEJ5 | <i>Geobacter pickeringii</i>        | Diguanylate phosphodiesterase                                                                                                                                                                              |
| 471 | 745 | 0.03 | B5EAA1     | <i>Geobacter bemidjiensis</i>       | Undecaprenyl-diphospho-oligosaccharide flippase                                                                                                                                                            |
| 472 | 745 | 0.03 | Q39Q46     | <i>Geobacter metallireducens</i>    | ABC transporter, ATP-binding/membrane protein                                                                                                                                                              |
| 473 | 745 | 0.03 | Q39YT5     | <i>Geobacter metallireducens</i>    | 3-deoxy-D-arabino-heptulosonate 7-phosphate synthase                                                                                                                                                       |
| 474 | 744 | 0.03 | Q74CS2     | <i>Geobacter sulfurreducens</i>     | Phosphate acyltransferase (EC 2.3.1.n2) (Acyl-ACP phosphotransacylase) (Acyl-[acyl-carrier-protein]--phosphate acyltransferase) (Phosphate-acyl-ACP acyltransferase)                                       |
| 475 | 743 | 0.03 | AOA0B5BAN8 | <i>Geobacter pickeringii</i>        | Branched-chain amino acid ABC transporter permease                                                                                                                                                         |
| 476 | 743 | 0.03 | Q39TA6     | <i>Geobacter metallireducens</i>    | Inosine-5'-monophosphate dehydrogenase (IMP dehydrogenase) (IMPD) (IMPDH) (EC 1.1.1.205)                                                                                                                   |
| 477 | 741 | 0.03 | AOA0B5BDF2 | <i>Geobacter pickeringii</i>        | Multifunctional fusion protein [Includes: ADP-dependent (S)-NAD(P)H-hydrate dehydratase (EC 4.2.1.136) (ADP-dependent NAD(P)HX dehydratase); NAD(P)H-hydrate epimerase (EC 5.1.99.6) (NAD(P)HX epimerase)] |
| 478 | 741 | 0.03 | Q39R24     | <i>Geobacter metallireducens</i>    | Helix-turn-helix transcriptional regulator, putative                                                                                                                                                       |

|     |     |      |            |                                  |                                                                                                                                                                                                                              |
|-----|-----|------|------------|----------------------------------|------------------------------------------------------------------------------------------------------------------------------------------------------------------------------------------------------------------------------|
| 479 | 740 | 0.03 | AOA0B5BHF1 | <i>Geobacter pickeringii</i>     | Antibiotic ABC transporter ATP-binding protein                                                                                                                                                                               |
| 480 | 740 | 0.03 | AOA0D5N930 | <i>Geobacter sulfurreducens</i>  | Cytochrome C                                                                                                                                                                                                                 |
| 481 | 740 | 0.03 | Q39RQ8     | <i>Geobacter metallireducens</i> | Ribose-phosphate pyrophosphokinase (RPPK) (EC 2.7.6.1) (5-phospho-D-ribosyl alpha-1-diphosphate) (Phosphoribosyl diphosphate synthase) (Phosphoribosyl pyrophosphate synthase) (P-Rib-PP synthase) (PRPP synthase) (PRPPase) |
| 482 | 740 | 0.03 | Q39ZM0     | <i>Geobacter metallireducens</i> | Iron-sulfur cluster-binding sigma-54-dependent transcriptional regulator, FehydlgC and FeS domain-containing                                                                                                                 |
| 483 | 739 | 0.03 | Q39RF8     | <i>Geobacter metallireducens</i> | Carbon starvation protein CstA                                                                                                                                                                                               |
| 484 | 738 | 0.03 | A0A0B5B759 | <i>Geobacter pickeringii</i>     | Probable peptidoglycan glycosyltransferase FtsW (PGT) (EC 2.4.1.129) (Cell division protein FtsW) (Cell wall polymerase) (Peptidoglycan polymerase) (PG polymerase)                                                          |
| 485 | 738 | 0.03 | A0A1G0M889 | <i>Geobacteraceae bacterium</i>  | Uncharacterized protein                                                                                                                                                                                                      |
| 486 | 738 | 0.03 | A5G6K7     | <i>Geobacter uraniireducens</i>  | Diguanylate cyclase                                                                                                                                                                                                          |
| 487 | 738 | 0.03 | P14243     | <i>Citrobacter freundii</i>      | Modification methylase Cfr9I (M.Cfr9I) (EC 2.1.1.113) (N(4)- cytosine-specific methyltransferase Cfr9I)                                                                                                                      |
| 488 | 735 | 0.03 | Q39ZF6     | <i>Geobacter metallireducens</i> | Carbamoyltransferase HypF (EC 2.1.3.-)                                                                                                                                                                                       |
| 489 | 734 | 0.03 | A0A0B5BCY4 | <i>Geobacter pickeringii</i>     | Aminodeoxyfutasine synthase (AFL synthase) (Aminofutasine synthase) (EC 2.5.1.120) (Menaquinone biosynthetic enzyme MqnE)                                                                                                    |
| 490 | 734 | 0.03 | Q74BW2     | <i>Geobacter sulfurreducens</i>  | Uridylate kinase (UK) (EC 2.7.4.22) (Uridine monophosphate kinase) (UMP kinase) (UMPK)                                                                                                                                       |
| 491 | 734 | 0.03 | Q39RR7     | <i>Geobacter metallireducens</i> | Cytochrome c                                                                                                                                                                                                                 |
| 492 | 734 | 0.03 |            |                                  |                                                                                                                                                                                                                              |
| 493 | 732 | 0.03 | A0A0B5BHV2 | <i>Geobacter pickeringii</i>     | Cytochrome C                                                                                                                                                                                                                 |
| 494 | 731 | 0.03 | AOA0D5N7A2 | <i>Geobacter sulfurreducens</i>  | Chemotaxis protein CheY                                                                                                                                                                                                      |
| 495 | 731 | 0.03 | Q39XX9     | <i>Geobacter metallireducens</i> | DNA-directed RNA polymerase subunit alpha (RNAP subunit alpha) (EC 2.7.7.6) (RNA polymerase subunit alpha) (Transcriptase subunit alpha)                                                                                     |
| 496 | 730 | 0.03 | A0A0D5N6L1 | <i>Geobacter sulfurreducens</i>  | Histidine kinase                                                                                                                                                                                                             |
| 497 | 729 | 0.03 | A0A0B5BJG9 | <i>Geobacter pickeringii</i>     | GntR family transcriptional regulator                                                                                                                                                                                        |
| 498 | 729 | 0.03 | A0A0D5N4L3 | <i>Geobacter sulfurreducens</i>  | UDP-N-acetyl-D-glucosamine dehydrogenase                                                                                                                                                                                     |
| 499 | 728 | 0.03 | A0A0B5BAQ7 | <i>Geobacter pickeringii</i>     | HD family phosphohydrolase                                                                                                                                                                                                   |
| 500 | 728 | 0.03 | A0A1E4LQS0 | <i>Comamonadaceae bacterium</i>  | Histidine kinase                                                                                                                                                                                                             |

**Table S4b.** Functional overview of M1C community (top 500 rank only).

| Rank | Count | Abundance | ID         | Organism                           | Protein Names                                                                                                                                                                            |
|------|-------|-----------|------------|------------------------------------|------------------------------------------------------------------------------------------------------------------------------------------------------------------------------------------|
| 1    | 6173  | 0.19      | A0A090I137 | <i>Methanobacterium formicicum</i> | Transposase                                                                                                                                                                              |
| 2    | 4631  | 0.14      | A0A1D3L4G2 | <i>Methanobacterium congolense</i> | Uncharacterized protein                                                                                                                                                                  |
| 3    | 2833  | 0.09      | A0A090JUS9 | <i>Methanobacterium formicicum</i> | Putative secreted protein                                                                                                                                                                |
| 4    | 2664  | 0.08      | A0A090I3J2 | <i>Methanobacterium formicicum</i> | Uncharacterized protein                                                                                                                                                                  |
| 5    | 2508  | 0.08      |            |                                    |                                                                                                                                                                                          |
| 6    | 2495  | 0.08      | A0A1D3L5C3 | <i>Methanobacterium congolense</i> | Uncharacterized protein                                                                                                                                                                  |
| 7    | 2469  | 0.07      | A7I7H9     | <i>Methanoregula boonei</i>        | TPR repeat-containing protein                                                                                                                                                            |
| 8    | 2078  | 0.06      | A0A1D3L0E4 | <i>Methanobacterium congolense</i> | WD40 domain-containing protein                                                                                                                                                           |
| 9    | 2071  | 0.06      | A7I4I9     | <i>Methanoregula boonei</i>        | DNA polymerase II large subunit (Pol II) (EC 2.7.7.7)                                                                                                                                    |
| 10   | 2008  | 0.06      | A0A1D3L0V2 | <i>Methanobacterium congolense</i> | Putative ATP-dependent helicase MG140 (EC 3.6.4.-)                                                                                                                                       |
| 11   | 1964  | 0.06      | A0A1D3L5A7 | <i>Methanobacterium congolense</i> | Uncharacterized protein                                                                                                                                                                  |
| 12   | 1923  | 0.06      | A7IAM2     | <i>Methanoregula boonei</i>        | Isoleucine--tRNA ligase (EC 6.1.1.5) (Isoleucyl-tRNA synthetase) (IleRS)                                                                                                                 |
| 13   | 1869  | 0.06      | A0A1D3L3T8 | <i>Methanobacterium congolense</i> | Type IIS restriction enzyme Eco57I (EC 3.1.21.4)                                                                                                                                         |
| 14   | 1856  | 0.06      | P06131     | <i>Methanobacterium formicicum</i> | Formate dehydrogenase subunit alpha (EC 1.2.1.2)                                                                                                                                         |
| 15   | 1821  | 0.05      | A0A1D3L508 | <i>Methanobacterium congolense</i> | WD40 domain-containing protein                                                                                                                                                           |
| 16   | 1770  | 0.05      | A7IAV3     | <i>Methanoregula boonei</i>        | V-type ATP synthase subunit I                                                                                                                                                            |
| 17   | 1762  | 0.05      | A0A101HE03 | <i>Methanobacterium sp.</i>        | WD40 domain protein beta Propeller                                                                                                                                                       |
| 18   | 1652  | 0.05      | A0A1D3KZI4 | <i>Methanobacterium congolense</i> | DNA polymerase II large subunit (Pol II) (EC 2.7.7.7)                                                                                                                                    |
| 19   | 1645  | 0.05      | A0A0S4FV74 | <i>Methanobacterium formicicum</i> | Uncharacterized protein                                                                                                                                                                  |
| 20   | 1618  | 0.05      | A0A1D3L5B8 | <i>Methanobacterium congolense</i> | Isoleucine--tRNA ligase (EC 6.1.1.5) (Isoleucyl-tRNA synthetase) (IleRS)                                                                                                                 |
| 21   | 1604  | 0.05      | A7I486     | <i>Methanoregula boonei</i>        | K(+)-insensitive pyrophosphate-energized proton pump (EC 3.6.1.1) (Membrane-bound proton-translocating pyrophosphatase) (Pyrophosphate-energized inorganic pyrophosphatase) (H(+)-PPase) |
| 22   | 1589  | 0.05      | A7IAD8     | <i>Methanoregula boonei</i>        | Chromosome partition protein Smc                                                                                                                                                         |
| 23   | 1587  | 0.05      | A7I9N6     | <i>Methanoregula boonei</i>        | DNA-directed RNA polymerase subunit (EC 2.7.7.6)                                                                                                                                         |
| 24   | 1555  | 0.05      | A0A089ZCJ0 | <i>Methanobacterium formicicum</i> | Cobalamin biosynthesis protein N (EC 6.6.1.2) (Cobaltochelatase CobN2)                                                                                                                   |

|    |      |      |            |                                    |                                                                                                      |
|----|------|------|------------|------------------------------------|------------------------------------------------------------------------------------------------------|
| 25 | 1547 | 0.05 | A0A1D3KZI9 | <i>Methanobacterium congolense</i> | Leucine--tRNA ligase (EC 6.1.1.4) (Leucyl-tRNA synthetase) (LeuRS)                                   |
| 26 | 1545 | 0.05 | A7I927     | <i>Methanoregula boonei</i>        | Valine--tRNA ligase (EC 6.1.1.9) (Valyl-tRNA synthetase) (ValRS)                                     |
| 27 | 1511 | 0.05 | A0A1D3L5M9 | <i>Methanobacterium congolense</i> | Putative ATP-dependent RNA helicase MJ1505 (EC 3.6.4.13)                                             |
| 28 | 1500 | 0.05 | A0A1D3L5A8 | <i>Methanobacterium congolense</i> | Long-chain-fatty-acid-CoA ligase FadD15 (EC 6.2.1.3)                                                 |
| 29 | 1499 | 0.05 | A7I656     | <i>Methanoregula boonei</i>        | Elongation factor 1-alpha (EF-1-alpha) (Elongation factor Tu) (EF-Tu)                                |
| 30 | 1451 | 0.04 | A7I4X4     | <i>Methanoregula boonei</i>        | Elongation factor 2 (EF-2)                                                                           |
| 31 | 1448 | 0.04 | U6ED34     | <i>Methanobacterium sp.</i>        | Protoporphyrin IX magnesium chelatase                                                                |
| 32 | 1443 | 0.04 | A0A1D3L027 | <i>Methanobacterium congolense</i> | Carbamoyl-phosphate synthase large chain (EC 6.3.5.5) (Carbamoyl-phosphate synthetase ammonia chain) |
| 33 | 1440 | 0.04 | A7I9M8     | <i>Methanoregula boonei</i>        | Leucine--tRNA ligase (EC 6.1.1.4) (Leucyl-tRNA synthetase) (LeuRS)                                   |
| 34 | 1439 | 0.04 | A7I5I6     | <i>Methanoregula boonei</i>        | Coenzyme F420 hydrogenase (EC 1.12.98.1)                                                             |
| 35 | 1425 | 0.04 | A0A1D3L429 | <i>Methanobacterium congolense</i> | Uncharacterized protein                                                                              |
| 36 | 1400 | 0.04 | A7I5U5     | <i>Methanoregula boonei</i>        | 4Fe-4S ferredoxin, iron-sulfur binding domain protein                                                |
| 37 | 1391 | 0.04 | A7I4W0     | <i>Methanoregula boonei</i>        | Oligosaccharyl transferase, STT3 subunit                                                             |
| 38 | 1389 | 0.04 | A7I6J1     | <i>Methanoregula boonei</i>        | Carbamoyl-phosphate synthase large chain (EC 6.3.5.5) (Carbamoyl-phosphate synthetase ammonia chain) |
| 39 | 1374 | 0.04 | A0A1D3L3R4 | <i>Methanobacterium congolense</i> | Putative membrane protein MJ1525                                                                     |
| 40 | 1352 | 0.04 | A0A1D3KZ93 | <i>Methanobacterium congolense</i> | Sodium/potassium-transporting ATPase subunit alpha-2 (EC 3.6.3.9)                                    |
| 41 | 1345 | 0.04 | A0A1D3L3L7 | <i>Methanobacterium congolense</i> | Metabotropic glutamate receptor-like protein R                                                       |
| 42 | 1337 | 0.04 | A0A1D3L118 | <i>Methanobacterium congolense</i> | Putative thiamine pyrophosphate-containing protein YdaP                                              |
| 43 | 1332 | 0.04 | A7I766     | <i>Methanoregula boonei</i>        | Efflux transporter, putative, hydrophobe/amphiphile efflux-3 (HAE3) family                           |
| 44 | 1320 | 0.04 | U6EA67     | <i>Methanobacterium sp.</i>        | Uncharacterized protein                                                                              |
| 45 | 1310 | 0.04 | A7I6S1     | <i>Methanoregula boonei</i>        | CoA-binding domain protein                                                                           |
| 46 | 1306 | 0.04 | A7IAQ1     | <i>Methanoregula boonei</i>        | Uncharacterized protein                                                                              |
| 47 | 1277 | 0.04 | A0A1D3L4J7 | <i>Methanobacterium congolense</i> | Transglutaminase domain-containing protein                                                           |
| 48 | 1273 | 0.04 | A7I4R1     | <i>Methanoregula boonei</i>        | Thermosome                                                                                           |
| 49 | 1264 | 0.04 | A0A1D3L5E6 | <i>Methanobacterium congolense</i> | Replication factor A                                                                                 |
| 50 | 1261 | 0.04 | A7I4K7     | <i>Methanoregula boonei</i>        | Lysine decarboxylase (EC 4.1.1.18)                                                                   |

|    |      |      |            |                                      |                                                                                     |
|----|------|------|------------|--------------------------------------|-------------------------------------------------------------------------------------|
| 51 | 1260 | 0.04 | A0A1D3L2M2 | <i>Methanobacterium congolense</i>   | Valine--tRNA ligase (EC 6.1.1.9) (Valyl-tRNA synthetase) (ValRS)                    |
| 52 | 1258 | 0.04 | A0A1D3L412 | <i>Methanobacterium congolense</i>   | Putative MFS-type transporter YusP                                                  |
| 53 | 1246 | 0.04 | A7I6H7     | <i>Methanoregula boonei</i>          | Methionine--tRNA ligase (EC 6.1.1.10) (Methionyl-tRNA synthetase) (MetRS)           |
| 54 | 1243 | 0.04 | A7I5I3     | <i>Methanoregula boonei</i>          | Coenzyme F420 hydrogenase/dehydrogenase beta subunit domain protein                 |
| 55 | 1232 | 0.04 | A0A089ZBK8 | <i>Methanobacterium formicicum</i>   | Adhesin-like protein                                                                |
| 56 | 1232 | 0.04 | A0A1D3L5Q7 | <i>Methanobacterium congolense</i>   | PAS domain S-box                                                                    |
| 57 | 1231 | 0.04 | A0A1D3L0B4 | <i>Methanobacterium congolense</i>   | Putative ATP-dependent helicase MJ1401 (EC 3.6.4.-)                                 |
| 58 | 1226 | 0.04 | A7I791     | <i>Methanoregula boonei</i>          | UvrABC system protein A (UvrA protein) (Excinuclease ABC subunit A)                 |
| 59 | 1224 | 0.04 | A0A089ZEB0 | <i>Methanobacterium formicicum</i>   | WD40 domain-containing cell surface protein                                         |
| 60 | 1222 | 0.04 | A0A1D3KZH1 | <i>Methanobacterium congolense</i>   | Copper-exporting P-type ATPase A (EC 3.6.3.54)                                      |
| 61 | 1221 | 0.04 | A7I9M7     | <i>Methanoregula boonei</i>          | PilT protein domain protein                                                         |
| 62 | 1218 | 0.04 | L0HAI4     | <i>Methanoregula formicica</i>       | Formate dehydrogenase, alpha subunit, archaeal-type                                 |
| 63 | 1214 | 0.04 | A0A1D3L0D2 | <i>Methanobacterium congolense</i>   | Copper-exporting P-type ATPase B (EC 3.6.3.54)                                      |
| 64 | 1212 | 0.04 | A7IAB8     | <i>Methanoregula boonei</i>          | Phosphoenolpyruvate synthase (PEP synthase) (EC 2.7.9.2) (Pyruvate, water dikinase) |
| 65 | 1205 | 0.04 |            |                                      |                                                                                     |
| 66 | 1200 | 0.04 | A0A1D3L4E7 | <i>Methanobacterium congolense</i>   | Phosphoenolpyruvate synthase (PEP synthase) (EC 2.7.9.2) (Pyruvate, water dikinase) |
| 67 | 1184 | 0.04 | A0A1D3KZY6 | <i>Methanobacterium congolense</i>   | Elongation factor 2 (EF-2)                                                          |
| 68 | 1175 | 0.04 | A0A1D3L3Z9 | <i>Methanobacterium congolense</i>   | Uncharacterized protein                                                             |
| 69 | 1172 | 0.04 | L0HG76     | <i>Methanoregula formicica</i>       | CRISPR-associated helicase Cas3/CRISPR-associated endonuclease Cas3-HD              |
| 70 | 1161 | 0.03 | E1RD00     | <i>Methanocaldococcus jettstonii</i> | Pyrolo-quinoline quinone                                                            |
| 71 | 1155 | 0.03 | A0A1D3L4X9 | <i>Methanobacterium congolense</i>   | Putative transcriptional regulatory protein pdtaR                                   |
| 72 | 1155 | 0.03 | A7I485     | <i>Methanoregula boonei</i>          | Vitamin B12-dependent ribonucleotide reductase (EC 1.17.4.1)                        |
| 73 | 1146 | 0.03 | A7I7B5     | <i>Methanoregula boonei</i>          | DNA polymerase (EC 2.7.7.7)                                                         |
| 74 | 1143 | 0.03 | A0A1D3L4R2 | <i>Methanobacterium congolense</i>   | Cyanobacterial phytochrome A (EC 2.7.13.3)                                          |
| 75 | 1137 | 0.03 | A0A1D3L0F2 | <i>Methanobacterium congolense</i>   | Archaeal Lon protease (EC 3.4.21.-)                                                 |
| 76 | 1136 | 0.03 | A7I4Y9     | <i>Methanoregula boonei</i>          | DEAD/DEAH box helicase domain protein                                               |
| 77 | 1128 | 0.03 | A7I7Z8     | <i>Methanoregula boonei</i>          | Type II secretion system protein                                                    |

|     |      |      |            |                                     |                                                                                                        |
|-----|------|------|------------|-------------------------------------|--------------------------------------------------------------------------------------------------------|
| 78  | 1123 | 0.03 | A7I5N0     | <i>Methanoregula boonei</i>         | AMP phosphorylase (AMPpase) (EC 2.4.2.57) (Nucleoside monophosphate phosphorylase) (NMP phosphorylase) |
| 79  | 1119 | 0.03 | A7I9L7     | <i>Methanoregula boonei</i>         | 4-vinyl reductase, 4VR                                                                                 |
| 80  | 1107 | 0.03 | A0A090I3X0 | <i>Methanobacterium formicicum</i>  | Nitrogenase protein alpha chain (EC 1.18.6.1)                                                          |
| 81  | 1102 | 0.03 | A7I7A6     | <i>Methanoregula boonei</i>         | Methyl-accepting chemotaxis sensory transducer                                                         |
| 82  | 1098 | 0.03 | A0A1D3L5G6 | <i>Methanobacterium congolense</i>  | DNA polymerase II small subunit (Pol II) (EC 2.7.7.7)                                                  |
| 83  | 1097 | 0.03 | A7IB61     | <i>Methanoregula boonei</i>         | ATP-dependent DNA helicase Hel308 (EC 3.6.4.12)                                                        |
| 84  | 1097 | 0.03 | A7I7S4     | <i>Methanoregula boonei</i>         | Alanine--tRNA ligase (EC 6.1.1.7) (Alanyl-tRNA synthetase) (AlaRS)                                     |
| 85  | 1096 | 0.03 | A0A1D3KZE7 | <i>Methanobacterium congolense</i>  | Putative sensor histidine kinase pdtaS (EC 2.7.13.3)                                                   |
| 86  | 1096 | 0.03 | A0A1D3L3K7 | <i>Methanobacterium congolense</i>  | Uncharacterised protein family (UPF0240)                                                               |
| 87  | 1085 | 0.03 | A0A1D3L0D3 | <i>Methanobacterium congolense</i>  | Calcium-transporting ATPase 1 (EC 3.6.3.8)                                                             |
| 88  | 1084 | 0.03 | A0A1D3L4A4 | <i>Methanobacterium congolense</i>  | Putative protease YrrO (EC 3.4.-.-)                                                                    |
| 89  | 1082 | 0.03 | A0A1D3L2A8 | <i>Methanobacterium congolense</i>  | Hydroxylamine reductase (EC 1.7.99.1) (Hybrid-cluster protein) (HCP) (Prismane protein)                |
| 90  | 1078 | 0.03 | A0A1D3L276 | <i>Methanobacterium congolense</i>  | UvrABC system protein A (UvrA protein) (Excinuclease ABC subunit A)                                    |
| 91  | 1070 | 0.03 | A0A1D3L596 | <i>Methanobacterium congolense</i>  | CoB-CoM heterodisulfide reductase iron-sulfur subunit A (EC 1.8.98.1)                                  |
| 92  | 1067 | 0.03 |            |                                     |                                                                                                        |
| 93  | 1066 | 0.03 | A0A1D3L1V6 | <i>Methanobacterium congolense</i>  | Uncharacterized protein                                                                                |
| 94  | 1054 | 0.03 | A0A1D3L506 | <i>Methanobacterium congolense</i>  | Carbamoyltransferase (EC 2.1.3.-)                                                                      |
| 95  | 1053 | 0.03 | A0A1D3L4H2 | <i>Methanobacterium congolense</i>  | Inner membrane protein YccS                                                                            |
| 96  | 1049 | 0.03 | E1RH75     | <i>Methanocaldococcus jirovecii</i> | Putative PAS/PAC sensor protein                                                                        |
| 97  | 1044 | 0.03 | A0A089ZDV6 | <i>Methanobacterium formicicum</i>  | Transposase                                                                                            |
| 98  | 1043 | 0.03 | A0A090I5G5 | <i>Methanobacterium formicicum</i>  | Uncharacterized protein                                                                                |
| 99  | 1043 | 0.03 | A7I7Z9     | <i>Methanoregula boonei</i>         | Type II secretion system protein E                                                                     |
| 100 | 1040 | 0.03 | A0A089ZVJ1 | <i>Methanobacterium formicicum</i>  | Cobaltochelataase CobN3 (Putative secreted protein)                                                    |
| 101 | 1039 | 0.03 | A0A1D3L1G9 | <i>Methanobacterium congolense</i>  | DNA helicase II related protein                                                                        |
| 102 | 1038 | 0.03 | A7I9Q1     | <i>Methanoregula boonei</i>         | Glutamine synthetase (EC 6.3.1.2)                                                                      |
| 103 | 1030 | 0.03 | A0A1D3L3V1 | <i>Methanobacterium congolense</i>  | Cyanobacterial phytochrome A (EC 2.7.13.3)                                                             |

|     |      |      |            |                                    |                                                                                                                                                                                                                                                                                   |
|-----|------|------|------------|------------------------------------|-----------------------------------------------------------------------------------------------------------------------------------------------------------------------------------------------------------------------------------------------------------------------------------|
| 104 | 1011 | 0.03 | A0A1D3L129 | <i>Methanobacterium congolense</i> | Putative ATP-dependent helicase MTH_1802 (EC 3.6.4.-)                                                                                                                                                                                                                             |
| 105 | 1011 | 0.03 | A7I4V8     | <i>Methanoregula boonei</i>        | Translation initiation factor 2 subunit gamma (aIF2-gamma) (eIF-2-gamma)                                                                                                                                                                                                          |
| 106 | 1010 | 0.03 | A7IAF8     | <i>Methanoregula boonei</i>        | ABC-1 domain protein                                                                                                                                                                                                                                                              |
| 107 | 1009 | 0.03 | A7I6S2     | <i>Methanoregula boonei</i>        | Acetate--CoA ligase                                                                                                                                                                                                                                                               |
| 108 | 1007 | 0.03 | A0A1D3KZR9 | <i>Methanobacterium congolense</i> | Putative PAS/PAC sensor protein                                                                                                                                                                                                                                                   |
| 109 | 1005 | 0.03 | A7I5R2     | <i>Methanoregula boonei</i>        | Protein translocase subunit SecY (Protein transport protein SEC61 subunit alpha homolog)                                                                                                                                                                                          |
| 110 | 1004 | 0.03 | A0A090JW16 | <i>Methanobacterium formicicum</i> | Uncharacterized protein                                                                                                                                                                                                                                                           |
| 111 | 1002 | 0.03 | A7IAZ8     | <i>Methanoregula boonei</i>        | Chaperonin Cpn60/TCP-1                                                                                                                                                                                                                                                            |
| 112 | 1000 | 0.03 | A7I6T1     | <i>Methanoregula boonei</i>        | Coenzyme F420 hydrogenase/dehydrogenase beta subunit domain protein                                                                                                                                                                                                               |
| 113 | 999  | 0.03 | A7I6P0     | <i>Methanoregula boonei</i>        | Threonine--tRNA ligase (EC 6.1.1.3) (Threonyl-tRNA synthetase) (ThrRS)                                                                                                                                                                                                            |
| 114 | 998  | 0.03 | A0A1D3L584 | <i>Methanobacterium congolense</i> | Uncharacterized protein                                                                                                                                                                                                                                                           |
| 115 | 992  | 0.03 | A0A1D3L132 | <i>Methanobacterium congolense</i> | Putative pseudomurein-binding protein                                                                                                                                                                                                                                             |
| 116 | 988  | 0.03 | A7I5S6     | <i>Methanoregula boonei</i>        | Tetrahydromethanopterin S-methyltransferase subunit A (EC 2.1.1.86) (N5-methyltetrahydromethanopterin--coenzyme M methyltransferase subunit A)                                                                                                                                    |
| 117 | 987  | 0.03 | A0A1D3L2H5 | <i>Methanobacterium congolense</i> | tRNA-guanine(15) transglycosylase (EC 2.4.2.48) (7-cyano-7-deazaguanine tRNA-ribosyltransferase) (Archaeal tRNA-guanine transglycosylase)                                                                                                                                         |
| 118 | 987  | 0.03 | A0A1D3L5K7 | <i>Methanobacterium congolense</i> | Threonine--tRNA ligase (EC 6.1.1.3) (Threonyl-tRNA synthetase) (ThrRS)                                                                                                                                                                                                            |
| 119 | 987  | 0.03 | A7I8Y5     | <i>Methanoregula boonei</i>        | DEAD/DEAH box helicase domain protein                                                                                                                                                                                                                                             |
| 120 | 987  | 0.03 | U6E9M3     | <i>Methanobacterium sp.</i>        | DNA-directed RNA polymerase subunit (EC 2.7.7.6)                                                                                                                                                                                                                                  |
| 121 | 986  | 0.03 | A0A1D3L0Y3 | <i>Methanobacterium congolense</i> | Cell division cycle protein 48 homolog MJ1156                                                                                                                                                                                                                                     |
| 122 | 983  | 0.03 | A0A1D3L007 | <i>Methanobacterium congolense</i> | Alanine--tRNA ligase (EC 6.1.1.7) (Alanyl-tRNA synthetase) (AlaRS)                                                                                                                                                                                                                |
| 123 | 983  | 0.03 | A0A1D3L4D8 | <i>Methanobacterium congolense</i> | Pyruvate carboxylase subunit B (EC 6.4.1.1)                                                                                                                                                                                                                                       |
| 124 | 982  | 0.03 | A0A1D3L3Z6 | <i>Methanobacterium congolense</i> | DNA replication licensing factor MCM7 (EC 3.6.4.12)                                                                                                                                                                                                                               |
| 125 | 982  | 0.03 | A0A1D3L579 | <i>Methanobacterium congolense</i> | Phosphoribosylformylglycinamide synthase subunit PurL (FGAM synthase) (EC 6.3.5.3) (Formylglycinamide ribonucleotide amidotransferase subunit II) (FGAR amidotransferase II) (FGAR-AT II) (Glutamine amidotransferase PurL) (Phosphoribosylformylglycinamide synthase subunit II) |
| 126 | 980  | 0.03 | A7I4F8     | <i>Methanoregula boonei</i>        | Amidophosphoribosyltransferase (ATase) (EC 2.4.2.14) (Glutamine phosphoribosylpyrophosphate amidotransferase) (GPATase)                                                                                                                                                           |
| 127 | 978  | 0.03 | A0A1D3L379 | <i>Methanobacterium congolense</i> | Calcium-transporting ATPase 1 (EC 3.6.3.8)                                                                                                                                                                                                                                        |



|     |     |      |            |                                                                        |                                                                                                                        |
|-----|-----|------|------------|------------------------------------------------------------------------|------------------------------------------------------------------------------------------------------------------------|
| 128 | 976 | 0.03 | A0A1D3KZ84 | <i>Methanobacterium congolense</i>                                     | Uncharacterized protein                                                                                                |
| 129 | 975 | 0.03 | A0A1D3L1K6 | <i>Methanobacterium congolense</i>                                     | Putative ATP-dependent helicase YprA (EC 3.6.4.-)                                                                      |
| 130 | 974 | 0.03 | A0A1D3L1R0 | <i>Methanobacterium congolense</i>                                     | Acetate-CoA ligase [ADP-forming] I (EC 6.2.1.13)                                                                       |
| 131 | 973 | 0.03 | L0HHJ6     | <i>Methanoregula formicica</i> (strain DSM 22288 / NBRC 105244 / SMSP) | Tubulin-like protein CetZ                                                                                              |
| 132 | 972 | 0.03 | A0A1D3KZW8 | <i>Methanobacterium congolense</i>                                     | Uncharacterized protein                                                                                                |
| 133 | 970 | 0.03 | A0A1D3L3P1 | <i>Methanobacterium congolense</i>                                     | Probable translation initiation factor IF-2                                                                            |
| 134 | 964 | 0.03 | A0A1D3L0U2 | <i>Methanobacterium congolense</i>                                     | Archaeal glutamate synthase [NADPH] (EC 1.4.1.13)                                                                      |
| 135 | 961 | 0.03 | A7I667     | <i>Methanoregula boonei</i>                                            | Phenylacetate--CoA ligase                                                                                              |
| 136 | 956 | 0.03 | A7I8X9     | <i>Methanoregula boonei</i>                                            | MCM family protein                                                                                                     |
| 137 | 955 | 0.03 | A0A1D3L3F6 | <i>Methanobacterium congolense</i>                                     | Minor teichoic acid biosynthesis protein GgaB                                                                          |
| 138 | 954 | 0.03 | L0HCK9     | <i>Methanoregula formicica</i>                                         | Formylmethanofuran dehydrogenase subunit A                                                                             |
| 139 | 953 | 0.03 | A0A1D3L355 | <i>Methanobacterium congolense</i>                                     | Lon protease (EC 3.4.21.53) (ATP-dependent protease La)                                                                |
| 140 | 952 | 0.03 | A0A1D3L1R3 | <i>Methanobacterium congolense</i>                                     | Putative sensor histidine kinase pdtaS (EC 2.7.13.3)                                                                   |
| 141 | 947 | 0.03 | A0A1D3KZX3 | <i>Methanobacterium congolense</i>                                     | DNA-directed RNA polymerase subunit beta (EC 2.7.7.6)                                                                  |
| 142 | 947 | 0.03 | A7I9N8     | <i>Methanoregula boonei</i>                                            | DNA-directed RNA polymerase (EC 2.7.7.6)                                                                               |
| 143 | 945 | 0.03 | A0A1D3L5J6 | <i>Methanobacterium congolense</i>                                     | Acetolactate synthase (EC 2.2.1.6)                                                                                     |
| 144 | 942 | 0.03 | A0A1D3L4X3 | <i>Methanobacterium congolense</i>                                     | Archaeal glutamate synthase [NADPH] (EC 1.4.1.13)                                                                      |
| 145 | 938 | 0.03 | A0A1D3L3V9 | <i>Methanobacterium congolense</i>                                     | Putative KH and PIN-domain containing protein MJ1533                                                                   |
| 146 | 936 | 0.03 | A7I8P2     | <i>Methanoregula boonei</i>                                            | Phosphoesterase, RecJ domain protein                                                                                   |
| 147 | 935 | 0.03 | A7I7Z3     | <i>Methanoregula boonei</i>                                            | CheA signal transduction histidine kinase                                                                              |
| 148 | 934 | 0.03 | A7I6H1     | <i>Methanoregula boonei</i>                                            | Glycyl-tRNA synthetase                                                                                                 |
| 149 | 930 | 0.03 | A0A1D3L430 | <i>Methanobacterium congolense</i>                                     | Cell division cycle protein 48 homolog MJ1156                                                                          |
| 150 | 928 | 0.03 | A7I8Y8     | <i>Methanoregula boonei</i>                                            | AMP-dependent synthetase and ligase                                                                                    |
| 151 | 926 | 0.03 | A0A1D3L2S6 | <i>Methanobacterium congolense</i>                                     | Putative sensor histidine kinase pdtaS (EC 2.7.13.3)                                                                   |
| 152 | 920 | 0.03 | A0A1D3L3E8 | <i>Methanobacterium congolense</i>                                     | Indolepyruvate oxidoreductase subunit IorA (IOR) (EC 1.2.7.8) (Indolepyruvate ferredoxin oxidoreductase subunit alpha) |
| 153 | 919 | 0.03 | A0A089ZFB5 | <i>Methanobacterium formicicum</i>                                     | Adhesin-like protein                                                                                                   |

|     |     |      |            |                                    |                                                                                                                                                                                                                                                                                                                                      |
|-----|-----|------|------------|------------------------------------|--------------------------------------------------------------------------------------------------------------------------------------------------------------------------------------------------------------------------------------------------------------------------------------------------------------------------------------|
| 154 | 916 | 0.03 | A7IAP7     | <i>Methanoregula boonei</i>        | Probable translation initiation factor IF-2                                                                                                                                                                                                                                                                                          |
| 155 | 915 | 0.03 | A7I9N7     | <i>Methanoregula boonei</i>        | DNA-directed RNA polymerase subunit beta (EC 2.7.7.6)                                                                                                                                                                                                                                                                                |
| 156 | 912 | 0.03 | A7IB37     | <i>Methanoregula boonei</i>        | ABC transporter related                                                                                                                                                                                                                                                                                                              |
| 157 | 911 | 0.03 | A7IAJ6     | <i>Methanoregula boonei</i>        | DEAD/DEAH box helicase domain protein                                                                                                                                                                                                                                                                                                |
| 158 | 909 | 0.03 | A7IAY8     | <i>Methanoregula boonei</i>        | Type II secretion system protein                                                                                                                                                                                                                                                                                                     |
| 159 | 908 | 0.03 | A0A1D3L5K4 | <i>Methanobacterium congolense</i> | Uncharacterized protein                                                                                                                                                                                                                                                                                                              |
| 160 | 907 | 0.03 | A7IB30     | <i>Methanoregula boonei</i>        | AAA family ATPase, CDC48 subfamily (EC 3.6.4.6)                                                                                                                                                                                                                                                                                      |
| 161 | 906 | 0.03 | A0A1D3L5S0 | <i>Methanobacterium congolense</i> | Arginine--tRNA ligase (EC 6.1.1.19) (Arginyl-tRNA synthetase) (ArgRS)                                                                                                                                                                                                                                                                |
| 162 | 906 | 0.03 | L0HHJ9     | <i>Methanoregula formicica</i>     | DNA gyrase subunit A (EC 5.99.1.3)                                                                                                                                                                                                                                                                                                   |
| 163 | 904 | 0.03 | A0A1D3L452 | <i>Methanobacterium congolense</i> | DNA topoisomerase 1 (EC 5.99.1.2) (DNA topoisomerase I)                                                                                                                                                                                                                                                                              |
| 164 | 903 | 0.03 | U6EDJ2     | <i>Methanobacterium sp.</i>        | Uncharacterized protein                                                                                                                                                                                                                                                                                                              |
| 165 | 900 | 0.03 | P06130     | <i>Methanobacterium formicicum</i> | Formate dehydrogenase subunit beta (EC 1.2.1.2)                                                                                                                                                                                                                                                                                      |
| 166 | 897 | 0.03 | A7IAE0     | <i>Methanoregula boonei</i>        | Serine hydroxymethyltransferase (SHMT) (Serine methylase) (EC 2.1.2.1)                                                                                                                                                                                                                                                               |
| 167 | 895 | 0.03 | A0A1D3L5X1 | <i>Methanobacterium congolense</i> | Dihydroxy-acid dehydratase (DAD) (EC 4.2.1.9)                                                                                                                                                                                                                                                                                        |
| 168 | 892 | 0.03 | A0A1D3L2D6 | <i>Methanobacterium congolense</i> | Putative cadmium-transporting ATPase (EC 3.6.3.3)                                                                                                                                                                                                                                                                                    |
| 169 | 892 | 0.03 | A0A1D3L4H3 | <i>Methanobacterium congolense</i> | V-type ATP synthase subunit I                                                                                                                                                                                                                                                                                                        |
| 170 | 892 | 0.03 | A0A1D3L5R3 | <i>Methanobacterium congolense</i> | Probable bifunctional tRNA threonylcarbamoyladenosine biosynthesis protein [Includes: Serine/threonine-protein kinase Bud32 (EC 2.7.11.1); tRNA N6-adenosine threonylcarbamoyltransferase (EC 2.3.1.234) (tRNA threonylcarbamoyladenosine biosynthesis protein Kae1) (t(6)A37 threonylcarbamoyladenosine biosynthesis protein Kae1)] |
| 171 | 891 | 0.03 | A0A1D3KZS9 | <i>Methanobacterium congolense</i> | Uncharacterized protein                                                                                                                                                                                                                                                                                                              |
| 172 | 889 | 0.03 | A0A1D3L170 | <i>Methanobacterium congolense</i> | ATP-dependent DNA helicase Hel308 (EC 3.6.4.12)                                                                                                                                                                                                                                                                                      |
| 173 | 889 | 0.03 | A7I7B3     | <i>Methanoregula boonei</i>        | UvrABC system protein B (Protein UvrB) (Excinuclease ABC subunit B)                                                                                                                                                                                                                                                                  |
| 174 | 885 | 0.03 | A7I6K0     | <i>Methanoregula boonei</i>        | Radical SAM domain protein                                                                                                                                                                                                                                                                                                           |
| 175 | 884 | 0.03 | A0A1D3L0K8 | <i>Methanobacterium congolense</i> | Glutamine--fructose-6-phosphate aminotransferase [isomerizing] (EC 2.6.1.16) (D-fructose-6-phosphate amidotransferase) (GFAT) (Glucosamine-6-phosphate synthase) (Hexosephosphate aminotransferase) (L-glutamine--D-fructose-6-phosphate amidotransferase)                                                                           |
| 176 | 882 | 0.03 | A0A1D3L3E2 | <i>Methanobacterium congolense</i> | Putative sensor histidine kinase pdtaS (EC 2.7.13.3)                                                                                                                                                                                                                                                                                 |

|     |     |      |            |                                     |                                                                                                                                                                                                                                                            |
|-----|-----|------|------------|-------------------------------------|------------------------------------------------------------------------------------------------------------------------------------------------------------------------------------------------------------------------------------------------------------|
| 177 | 882 | 0.03 |            |                                     |                                                                                                                                                                                                                                                            |
| 178 | 881 | 0.03 | A7I859     | <i>Methanoregula boonei</i>         | Uncharacterized protein                                                                                                                                                                                                                                    |
| 179 | 881 | 0.03 | A7IAU7     | <i>Methanoregula boonei</i>         | V-type ATP synthase beta chain (V-ATPase subunit B)                                                                                                                                                                                                        |
| 180 | 880 | 0.03 | A0A1D3L5K9 | <i>Methanobacterium congolense</i>  | Uncharacterized protein                                                                                                                                                                                                                                    |
| 181 | 879 | 0.03 | A0A1D3L094 | <i>Methanobacterium congolense</i>  | Magnesium-chelatase subunit ChII homolog                                                                                                                                                                                                                   |
| 182 | 876 | 0.03 | A0A1D3L4H1 | <i>Methanobacterium congolense</i>  | Acetyl-CoA decarbonylase/synthase complex subunit alpha (ACDS complex subunit alpha) (EC 1.2.7.4) (ACDS complex carbon monoxide dehydrogenase subunit alpha) (ACDS CODH subunit alpha)                                                                     |
| 183 | 872 | 0.03 | A0A1D3L223 | <i>Methanobacterium congolense</i>  | CoB-CoM heterodisulfide reductase 1 iron-sulfur subunit A (EC 1.8.98.1)                                                                                                                                                                                    |
| 184 | 872 | 0.03 | A7I4W3     | <i>Methanoregula boonei</i>         | Glutamine--fructose-6-phosphate aminotransferase [isomerizing] (EC 2.6.1.16) (D-fructose-6-phosphate amidotransferase) (GFAT) (Glucosamine-6-phosphate synthase) (Hexosephosphate aminotransferase) (L-glutamine--D-fructose-6-phosphate amidotransferase) |
| 185 | 870 | 0.03 | A0A089ZH30 | <i>Methanobacterium formicicum</i>  | Signal transduction histidine kinase                                                                                                                                                                                                                       |
| 186 | 870 | 0.03 | A7I798     | <i>Methanoregula boonei</i>         | 60 kDa chaperonin (GroEL protein) (Protein Cpn60)                                                                                                                                                                                                          |
| 187 | 868 | 0.03 | A7I6L6     | <i>Methanoregula boonei</i>         | DNA topoisomerase 1 (EC 5.99.1.2) (DNA topoisomerase I)                                                                                                                                                                                                    |
| 188 | 867 | 0.03 | A0A1D3L407 | <i>Methanobacterium congolense</i>  | Putative actinorhodin transporter                                                                                                                                                                                                                          |
| 189 | 867 | 0.03 | A0A1D3L551 | <i>Methanobacterium congolense</i>  | Uncharacterized protein                                                                                                                                                                                                                                    |
| 190 | 866 | 0.03 | A0A0E4GC68 | <i>Syntrophomonas zehnderi</i> OL-4 | Pectin lyase fold/virulence factor (Fragment)                                                                                                                                                                                                              |
| 191 | 866 | 0.03 | A7IAQ3     | <i>Methanoregula boonei</i>         | GCN5-related N-acetyltransferase                                                                                                                                                                                                                           |
| 192 | 865 | 0.03 | A0A1D3L5B6 | <i>Methanobacterium congolense</i>  | Helicase c2                                                                                                                                                                                                                                                |
| 193 | 855 | 0.03 | A0A1D3L1W6 | <i>Methanobacterium congolense</i>  | Methionine--tRNA ligase (EC 6.1.1.10) (Methionyl-tRNA synthetase) (MetRS)                                                                                                                                                                                  |
| 194 | 855 | 0.03 | A7I8Z2     | <i>Methanoregula boonei</i>         | Ammonium transporter                                                                                                                                                                                                                                       |
| 195 | 853 | 0.03 | A0A1D3L0K7 | <i>Methanobacterium congolense</i>  | Digeranylgeranyl glycerophospholipid reductase (DGGGPL reductase) (EC 1.3.7.11) (2,3-bis-O-geranylgeranyl glyceryl phosphate reductase) (Geranylgeranyl reductase) (GGR)                                                                                   |
| 196 | 852 | 0.03 | A0A1D3L4V1 | <i>Methanobacterium congolense</i>  | Uncharacterized protein                                                                                                                                                                                                                                    |
| 197 | 852 | 0.03 | A7I988     | <i>Methanoregula boonei</i>         | Acetyl-CoA carboxylase, biotin carboxylase                                                                                                                                                                                                                 |
| 198 | 852 | 0.03 |            |                                     |                                                                                                                                                                                                                                                            |
| 199 | 849 | 0.03 | A0A1D3L3Q6 | <i>Methanobacterium congolense</i>  | Pyridoxal 5'-phosphate synthase subunit PdxS (PLP synthase subunit PdxS) (EC 4.3.3.6) (Pdx1)                                                                                                                                                               |

|     |     |      |            |                                     |                                                                                                                                                |
|-----|-----|------|------------|-------------------------------------|------------------------------------------------------------------------------------------------------------------------------------------------|
| 200 | 848 | 0.03 | A7I8B1     | <i>Methanoregula boonei</i>         | Polyphosphate kinase (EC 2.7.4.1) (ATP-polyphosphate phosphotransferase) (Polyphosphoric acid kinase)                                          |
| 201 | 848 | 0.03 | E1RH76     | <i>Methanocaldococcus jirovecii</i> | F420-dependent oxidoreductase, G6PDH family                                                                                                    |
| 202 | 847 | 0.03 | A7I4G8     | <i>Methanoregula boonei</i>         | Aspartate--tRNA(Asp/Asn) ligase (EC 6.1.1.23) (Aspartyl-tRNA synthetase) (AspRS) (Non-discriminating aspartyl-tRNA synthetase) (ND-AspRS)      |
| 203 | 843 | 0.03 | A0A1D3L3N4 | <i>Methanobacterium congolense</i>  | Acetyl-coenzyme A synthetase (EC 6.2.1.1)                                                                                                      |
| 204 | 841 | 0.03 | A0A1D3L4J0 | <i>Methanobacterium congolense</i>  | Phage infection protein                                                                                                                        |
| 205 | 840 | 0.03 | A7I822     | <i>Methanoregula boonei</i>         | K <sup>+</sup> potassium transporter                                                                                                           |
| 206 | 839 | 0.03 | A7I464     | <i>Methanoregula boonei</i>         | ORC1-type DNA replication protein                                                                                                              |
| 207 | 839 | 0.03 | L0HEU5     | <i>Methanoregula formicica</i>      | DNA gyrase subunit B (EC 5.99.1.3)                                                                                                             |
| 208 | 838 | 0.03 | A0A1D3L0A6 | <i>Methanobacterium congolense</i>  | Putative acyl-CoA synthetase YngI (EC 6.2.1.-)                                                                                                 |
| 209 | 838 | 0.03 | A7I9N5     | <i>Methanoregula boonei</i>         | DNA-directed RNA polymerase subunit A'' (EC 2.7.7.6)                                                                                           |
| 210 | 838 | 0.03 | A7I4Y2     | <i>Methanoregula boonei</i>         | Arginine--tRNA ligase (EC 6.1.1.19) (Arginyl-tRNA synthetase) (ArgRS)                                                                          |
| 211 | 832 | 0.03 | K2R0T8     | <i>Methanobacterium formicicum</i>  | DNA-directed RNA polymerase subunit (EC 2.7.7.6)                                                                                               |
| 212 | 829 | 0.02 | A7I4C9     | <i>Methanoregula boonei</i>         | Acetate--CoA ligase                                                                                                                            |
| 213 | 827 | 0.02 | A0A1D3L2G6 | <i>Methanobacterium congolense</i>  | Methyl sulfide methyltransferase-associated sensor (EC 2.7.13.3)                                                                               |
| 214 | 826 | 0.02 | A7I5U3     | <i>Methanoregula boonei</i>         | Methyl-coenzyme M reductase, beta subunit                                                                                                      |
| 215 | 825 | 0.02 | A0A1D3L5S7 | <i>Methanobacterium congolense</i>  | Uncharacterized protein                                                                                                                        |
| 216 | 825 | 0.02 | A7I679     | <i>Methanoregula boonei</i>         | Tyrosine recombinase XerA                                                                                                                      |
| 217 | 824 | 0.02 | A0A1D3KZQ9 | <i>Methanobacterium congolense</i>  | Putative (R)-citramalate synthase CimA (EC 2.3.1.182)                                                                                          |
| 218 | 822 | 0.02 | A0A1D3L3Z3 | <i>Methanobacterium congolense</i>  | Putative ABC transporter ATP-binding protein MJ0719                                                                                            |
| 219 | 822 | 0.02 | A0A1D3L537 | <i>Methanobacterium congolense</i>  | Uncharacterized protein                                                                                                                        |
| 220 | 821 | 0.02 | A7IA93     | <i>Methanoregula boonei</i>         | CTP synthase (EC 6.3.4.2) (Cytidine 5'-triphosphate synthase) (Cytidine triphosphate synthetase) (CTP synthetase) (CTPS) (UTP--ammonia ligase) |
| 221 | 820 | 0.02 | A0A090I571 | <i>Methanobacterium formicicum</i>  | Carbamoyl-phosphate synthase large chain (EC 6.3.5.5) (Carbamoyl-phosphate synthetase ammonia chain)                                           |
| 222 | 819 | 0.02 | A7I4B9     | <i>Methanoregula boonei</i>         | Aminotransferase (EC 2.6.1.-)                                                                                                                  |
| 223 | 817 | 0.02 | A0A089ZDS9 | <i>Methanobacterium formicicum</i>  | DNA polymerase II large subunit (Pol II) (EC 2.7.7.7)                                                                                          |
| 224 | 817 | 0.02 | A0A1D3L0U0 | <i>Methanobacterium congolense</i>  | Insertion element ISM1 uncharacterized 48,3 kDa protein                                                                                        |

|     |     |      |            |                                    |                                                                                            |
|-----|-----|------|------------|------------------------------------|--------------------------------------------------------------------------------------------|
| 225 | 815 | 0.02 | A0A1D3L0X2 | <i>Methanobacterium congolense</i> | Vitamin B12-dependent ribonucleotide reductase (EC 1.17.4.1)                               |
| 226 | 814 | 0.02 | A0A1D3L4L3 | <i>Methanobacterium congolense</i> | Trk system potassium uptake protein TrkH                                                   |
| 227 | 814 | 0.02 | A7I666     | <i>Methanoregula boonei</i>        | Phenylacetate--CoA ligase (EC 6.2.1.30)                                                    |
| 228 | 814 | 0.02 | A7IAM8     | <i>Methanoregula boonei</i>        | TrkA-N domain protein                                                                      |
| 229 | 813 | 0.02 | A0A1D3L203 | <i>Methanobacterium congolense</i> | Uncharacterized protein                                                                    |
| 230 | 813 | 0.02 | A0A1D3L3U3 | <i>Methanobacterium congolense</i> | DNA-binding protein MutS2                                                                  |
| 231 | 810 | 0.02 | A0A1D3L3M7 | <i>Methanobacterium congolense</i> | Putative glycosyltransferase YfnE (EC 2.4.-.-)                                             |
| 232 | 810 | 0.02 | A0A1D3L5J2 | <i>Methanobacterium congolense</i> | Putative sensor histidine kinase pdtaS (EC 2.7.13.3)                                       |
| 233 | 809 | 0.02 | A0A1D3L2F4 | <i>Methanobacterium congolense</i> | Inosine-5'-monophosphate dehydrogenase (IMP dehydrogenase) (IMPD) (IMPDH) (EC 1.1.1.205)   |
| 234 | 806 | 0.02 | A7IAZ4     | <i>Methanoregula boonei</i>        | Peptidase S16, Lon-like protease (EC 3.4.21.53)                                            |
| 235 | 805 | 0.02 | A7IAB7     | <i>Methanoregula boonei</i>        | D-3-phosphoglycerate dehydrogenase (EC 1.1.1.95)                                           |
| 236 | 805 | 0.02 | A7I5I7     | <i>Methanoregula boonei</i>        | GTP cyclohydrolase MptA (EC 3.5.4.39) (GTP cyclohydrolase IV)                              |
| 237 | 800 | 0.02 | A7I931     | <i>Methanoregula boonei</i>        | GTP-binding protein, HSR1-related                                                          |
| 238 | 797 | 0.02 | A0A1D3KZR8 | <i>Methanobacterium congolense</i> | DNA ligase (EC 6.5.1.1) (Polydeoxyribonucleotide synthase [ATP])                           |
| 239 | 795 | 0.02 | L0HI79     | <i>Methanoregula formicica</i>     | CRISPR-associated protein Cas8c/Csd1, subtype I-C/DVULG                                    |
| 240 | 795 | 0.02 | Q8VQM8     | <i>Prevotella intermedia</i>       | Mobilization protein                                                                       |
| 241 | 792 | 0.02 | E1RF47     | <i>Methanocaldococcus jectus</i>   | Ammonium transporter                                                                       |
| 242 | 791 | 0.02 | A0A1D3L598 | <i>Methanobacterium congolense</i> | Chaperone protein DnaK (HSP70) (Heat shock 70 kDa protein) (Heat shock protein 70)         |
| 243 | 791 | 0.02 | A7I4I5     | <i>Methanoregula boonei</i>        | UbiD family decarboxylase                                                                  |
| 244 | 791 | 0.02 | A7I7L4     | <i>Methanoregula boonei</i>        | Chaperone protein DnaK (HSP70) (Heat shock 70 kDa protein) (Heat shock protein 70)         |
| 245 | 789 | 0.02 | A7IAG9     | <i>Methanoregula boonei</i>        | Enolase (EC 4.2.1.11) (2-phospho-D-glycerate hydro-lyase) (2-phosphoglycerate dehydratase) |
| 246 | 788 | 0.02 | A0A1D3L4I8 | <i>Methanobacterium congolense</i> | Polyferredoxin protein MvhB                                                                |
| 247 | 787 | 0.02 | A7I648     | <i>Methanoregula boonei</i>        | Uncharacterized protein                                                                    |
| 248 | 787 | 0.02 | A7I800     | <i>Methanoregula boonei</i>        | Putative flagellar protein FlaH                                                            |
| 249 | 786 | 0.02 | A7IB03     | <i>Methanoregula boonei</i>        | Phosphate uptake regulator, PhoU                                                           |

|     |     |      |            |                                    |                                                                                                                                                                                  |
|-----|-----|------|------------|------------------------------------|----------------------------------------------------------------------------------------------------------------------------------------------------------------------------------|
| 250 | 785 | 0.02 | A0A1D3KZ36 | <i>Methanobacterium congolense</i> | O-phosphoserine--tRNA(Cys) ligase (O-phosphoserine--tRNA ligase) (EC 6.1.1.27) (Non-canonical O-phosphoseryl-tRNA(Cys) synthetase) (O-phosphoseryl-tRNA(Cys) synthetase) (SepRS) |
| 251 | 785 | 0.02 | A0A1D3L078 | <i>Methanobacterium congolense</i> | DEAD-box ATP-dependent RNA helicase CshA (EC 3.6.4.13)                                                                                                                           |
| 252 | 785 | 0.02 | A7IAV0     | <i>Methanoregula boonei</i>        | V-type ATP synthase subunit C (V-ATPase subunit C)                                                                                                                               |
| 253 | 782 | 0.02 | A0A1D3KZT8 | <i>Methanobacterium congolense</i> | Acyl-coenzyme A synthetase ACSM3, mitochondrial (EC 6.2.1.2)                                                                                                                     |
| 254 | 781 | 0.02 | L0HD61     | <i>Methanoregula formicica</i>     | Coenzyme F420-reducing hydrogenase, beta subunit                                                                                                                                 |
| 255 | 780 | 0.02 | A7I9L0     | <i>Methanoregula boonei</i>        | Type II secretion system protein E                                                                                                                                               |
| 256 | 777 | 0.02 | F3ZQL8     | <i>Bacteroides coprosuis</i>       | Transposase IS4 family protein                                                                                                                                                   |
| 257 | 776 | 0.02 | A0A1D3L4R1 | <i>Methanobacterium congolense</i> | V-type ATP synthase alpha chain (EC 3.6.3.14) (V-ATPase subunit A)                                                                                                               |
| 258 | 775 | 0.02 | A0A1D3L2V1 | <i>Methanobacterium congolense</i> | Uncharacterized protein                                                                                                                                                          |
| 259 | 775 | 0.02 | A7I989     | <i>Methanoregula boonei</i>        | Oxaloacetate decarboxylase alpha subunit                                                                                                                                         |
| 260 | 775 | 0.02 | A7IAT4     | <i>Methanoregula boonei</i>        | Lysine--tRNA ligase (EC 6.1.1.6) (Lysyl-tRNA synthetase) (LysRS)                                                                                                                 |
| 261 | 774 | 0.02 | A0A1D3L0L8 | <i>Methanobacterium congolense</i> | Signal transduction histidine kinase                                                                                                                                             |
| 262 | 772 | 0.02 | A0A089ZG44 | <i>Methanobacterium formicicum</i> | Histidine kinase/GAF/PAS domain-containing protein                                                                                                                               |
| 263 | 772 | 0.02 | A0A1D3L1A5 | <i>Methanobacterium congolense</i> | Acetyl-coenzyme A synthetase (EC 6.2.1.1)                                                                                                                                        |
| 264 | 772 | 0.02 | A7I6E6     | <i>Methanoregula boonei</i>        | Heavy metal translocating P-type ATPase                                                                                                                                          |
| 265 | 770 | 0.02 | A0A1D3L3V6 | <i>Methanobacterium congolense</i> | Methanogenesis regulatory histidine kinase Fill (EC 2.7.13.3)                                                                                                                    |
| 266 | 769 | 0.02 | A0A1D3L5A3 | <i>Methanobacterium congolense</i> | Coenzyme F420 hydrogenase subunit alpha (EC 1.12.98.1)                                                                                                                           |
| 267 | 769 | 0.02 |            |                                    |                                                                                                                                                                                  |
| 268 | 767 | 0.02 | A0A1D3KZT0 | <i>Methanobacterium congolense</i> | Adenine deaminase (Adenase) (Adenine aminase) (EC 3.5.4.2)                                                                                                                       |
| 269 | 767 | 0.02 | A7I842     | <i>Methanoregula boonei</i>        | Beta-lactamase domain protein                                                                                                                                                    |
| 270 | 765 | 0.02 | A0A1D3KZN6 | <i>Methanobacterium congolense</i> | Global nitrogen regulator NrpR                                                                                                                                                   |
| 271 | 765 | 0.02 | A7I498     | <i>Methanoregula boonei</i>        | DNA polymerase II small subunit (Pol II) (EC 2.7.7.7)                                                                                                                            |
| 272 | 765 | 0.02 | A7I6N3     | <i>Methanoregula boonei</i>        | Amidohydrolase 3                                                                                                                                                                 |
| 273 | 765 | 0.02 | A7I941     | <i>Methanoregula boonei</i>        | Type 2 DNA topoisomerase 6 subunit B (EC 5.99.1.3) (Type II DNA topoisomerase VI subunit B) (TopoVI-B)                                                                           |
| 274 | 763 | 0.02 | A0A1D3KZQ6 | <i>Methanobacterium congolense</i> | Type 2 DNA topoisomerase 6 subunit B (EC 5.99.1.3) (Type II DNA topoisomerase VI subunit B) (TopoVI-B)                                                                           |

|     |     |      |            |                                    |                                                                                    |
|-----|-----|------|------------|------------------------------------|------------------------------------------------------------------------------------|
| 275 | 761 | 0.02 |            |                                    |                                                                                    |
| 276 | 760 | 0.02 | A0A1D3L5T8 | <i>Methanobacterium congolense</i> | Putative transporter YebQ                                                          |
| 277 | 760 | 0.02 | A7IAJ9     | <i>Methanoregula boonei</i>        | Carbamoyltransferase (EC 2.1.3.-)                                                  |
| 278 | 759 | 0.02 | A0A1D3L514 | <i>Methanobacterium congolense</i> | GTP-binding protein 1                                                              |
| 279 | 758 | 0.02 | A0A1D3KZW0 | <i>Methanobacterium congolense</i> | Putative ABC transporter ATP-binding protein MJ1242                                |
| 280 | 758 | 0.02 | A7I654     | <i>Methanoregula boonei</i>        | Glycosyl transferase, family 39                                                    |
| 281 | 756 | 0.02 | A0A1D3L0A1 | <i>Methanobacterium congolense</i> | UDP-N-acetylmuramoyl-L-alanyl-D-glutamate-2,6-diaminopimelate ligase (EC 6.3.2.13) |
| 282 | 756 | 0.02 | A0A1D3L5F2 | <i>Methanobacterium congolense</i> | Diaminopimelate decarboxylase (DAP decarboxylase) (DAPDC) (EC 4.1.1.20)            |
| 283 | 753 | 0.02 | F6D827     | <i>Methanobacterium paludis</i>    | Formylmethanofuran dehydrogenase subunit B (EC 1.2.99.5)                           |
| 284 | 752 | 0.02 | A0A1D3L014 | <i>Methanobacterium congolense</i> | GAF domain protein                                                                 |
| 285 | 752 | 0.02 | A0A1D3L5F7 | <i>Methanobacterium congolense</i> | Putative transporter YebQ                                                          |
| 286 | 751 | 0.02 | A0A1D3L2V9 | <i>Methanobacterium congolense</i> | Uncharacterized protein                                                            |
| 287 | 750 | 0.02 | A0A1D3L095 | <i>Methanobacterium congolense</i> | Putative membrane protein                                                          |
| 288 | 749 | 0.02 | A0A089ZV91 | <i>Methanobacterium formicicum</i> | Histidine kinase/PAS domain-containing protein                                     |
| 289 | 749 | 0.02 | A0A1D3L4K9 | <i>Methanobacterium congolense</i> | Uncharacterized protein                                                            |
| 290 | 748 | 0.02 | A7IAG1     | <i>Methanoregula boonei</i>        | Glutamate--tRNA ligase (EC 6.1.1.17) (Glutamyl-tRNA synthetase) (GluRS)            |
| 291 | 747 | 0.02 | A0A1D3L3I1 | <i>Methanobacterium congolense</i> | Glycine-tRNA ligase (EC 6.1.1.14)                                                  |
| 292 | 747 | 0.02 | A7I8Q2     | <i>Methanoregula boonei</i>        | AAA family ATPase, CDC48 subfamily (EC 3.6.4.6)                                    |
| 293 | 747 | 0.02 | A7I9C0     | <i>Methanoregula boonei</i>        | Pyruvate carboxyltransferase                                                       |
| 294 | 746 | 0.02 | A7I487     | <i>Methanoregula boonei</i>        | NADH dehydrogenase (Quinone) (EC 1.6.99.5)                                         |
| 295 | 745 | 0.02 | A0A1D3L0W5 | <i>Methanobacterium congolense</i> | Putative membrane protein                                                          |
| 296 | 744 | 0.02 | A0A1D3L5L2 | <i>Methanobacterium congolense</i> | Uncharacterized protein                                                            |
| 297 | 744 | 0.02 | A7I4R9     | <i>Methanoregula boonei</i>        | Sodium/hydrogen exchanger                                                          |
| 298 | 743 | 0.02 | A0A1D3L4I5 | <i>Methanobacterium congolense</i> | Methyl-coenzyme M reductase I subunit beta (EC 2.8.4.1)                            |
| 299 | 743 | 0.02 | A7I7Y9     | <i>Methanoregula boonei</i>        | ABC transporter related                                                            |
| 300 | 740 | 0.02 | A0A1D3L1B1 | <i>Methanobacterium congolense</i> | Putative LRR receptor-like serine/threonine-protein kinase At1g06840 (EC 2.7.11.1) |
| 301 | 740 | 0.02 | A0A1D3L4J5 | <i>Methanobacterium congolense</i> | Uncharacterized protein                                                            |

|     |     |      |            |                                    |                                                         |
|-----|-----|------|------------|------------------------------------|---------------------------------------------------------|
| 302 | 740 | 0.02 | A0A1D3L4T1 | <i>Methanobacterium congolense</i> | Homoserine dehydrogenase (EC 1.1.1.3)                   |
| 303 | 739 | 0.02 | A0A1D3KZV6 | <i>Methanobacterium congolense</i> | Uncharacterized protein                                 |
| 304 | 739 | 0.02 | A0A1D3L0W3 | <i>Methanobacterium congolense</i> | AAA ATPase                                              |
| 305 | 739 | 0.02 | A0A1D3L554 | <i>Methanobacterium congolense</i> | Divalent metal cation transporter MntH                  |
| 306 | 737 | 0.02 | A0A1D3KZ40 | <i>Methanobacterium congolense</i> | Fumarate reductase (CoM/CoB) subunit A                  |
| 307 | 737 | 0.02 | A0A1D3L5L1 | <i>Methanobacterium congolense</i> | Multidrug resistance protein Stp                        |
| 308 | 737 | 0.02 | U6ECW1     | <i>Methanobacterium sp.</i>        | Uncharacterized protein                                 |
| 309 | 736 | 0.02 | A7I4F0     | <i>Methanoregula boonei</i>        | Aspartokinase (EC 2.7.2.4)                              |
| 310 | 735 | 0.02 | A7I6C7     | <i>Methanoregula boonei</i>        | AMP-dependent synthetase and ligase                     |
| 311 | 733 | 0.02 | A0A1D3KZ91 | <i>Methanobacterium congolense</i> | Putative glutamine amidotransferase-like protein MJ0138 |
| 312 | 732 | 0.02 | A0A1D3L220 | <i>Methanobacterium congolense</i> | Uncharacterized protein                                 |
| 313 | 732 | 0.02 | A7I9A2     | <i>Methanoregula boonei</i>        | Protein-export membrane protein SecD                    |
| 314 | 731 | 0.02 | A0A1D3L102 | <i>Methanobacterium congolense</i> | Putative membrane protein YabM                          |
| 315 | 731 | 0.02 | F6D828     | <i>Methanobacterium paludis</i>    | Formylmethanofuran dehydrogenase subunit A              |
| 316 | 730 | 0.02 | A0A1D3L4V5 | <i>Methanobacterium congolense</i> | Putative cation transporter MJ1485                      |
| 317 | 730 | 0.02 | A7I7G0     | <i>Methanoregula boonei</i>        | Beta-lactamase domain protein                           |
| 318 | 729 | 0.02 | A0A1D3L317 | <i>Methanobacterium congolense</i> | Uncharacterized protein                                 |
| 319 | 728 | 0.02 | A0A1D3L068 | <i>Methanobacterium congolense</i> | Multidrug export protein EmrB                           |
| 320 | 728 | 0.02 | A0A1D3L3X0 | <i>Methanobacterium congolense</i> | Acetolactate synthase large subunit (EC 2.2.1.6)        |
| 321 | 728 | 0.02 | A0A1D3L504 | <i>Methanobacterium congolense</i> | DNA polymerase (EC 2.7.7.7)                             |
| 322 | 728 | 0.02 | A7IAU5     | <i>Methanoregula boonei</i>        | Phosphoglycerate kinase (EC 2.7.2.3)                    |
| 323 | 727 | 0.02 | A0A1D3L4A8 | <i>Methanobacterium congolense</i> | Uncharacterized protein                                 |
| 324 | 726 | 0.02 | A0A1D3L1D7 | <i>Methanobacterium congolense</i> | Uncharacterized protein                                 |
| 325 | 726 | 0.02 | A0A1D3L369 | <i>Methanobacterium congolense</i> | Transposase                                             |
| 326 | 726 | 0.02 | A0A1D3L5B2 | <i>Methanobacterium congolense</i> | Putative polyferredoxin-like protein MJ1303             |
| 327 | 726 | 0.02 | A7I763     | <i>Methanoregula boonei</i>        | Conserved TM helix repeat-containing protein            |
| 328 | 726 | 0.02 | A7IAF0     | <i>Methanoregula boonei</i>        | Major facilitator superfamily MFS_1                     |



|     |     |      |            |                                    |                                                                                                                                                                                                            |
|-----|-----|------|------------|------------------------------------|------------------------------------------------------------------------------------------------------------------------------------------------------------------------------------------------------------|
| 329 | 725 | 0.02 | A0A1D3L0S3 | <i>Methanobacterium congolense</i> | Single-stranded-DNA-specific exonuclease RecJ (EC 3.1.-.-)                                                                                                                                                 |
| 330 | 723 | 0.02 | A0A1D3L153 | <i>Methanobacterium congolense</i> | Uncharacterized protein                                                                                                                                                                                    |
| 331 | 721 | 0.02 | A7I7F3     | <i>Methanoregula boonei</i>        | Nitrogenase molybdenum-iron protein beta chain (EC 1.18.6.1)                                                                                                                                               |
| 332 | 720 | 0.02 | A0A1D3KZ76 | <i>Methanobacterium congolense</i> | Putative 2-isopropylmalate synthase (EC 2.3.3.13)                                                                                                                                                          |
| 333 | 720 | 0.02 | A0A1D3L0L3 | <i>Methanobacterium congolense</i> | Amidophosphoribosyltransferase (ATase) (EC 2.4.2.14) (Glutamine phosphoribosylpyrophosphate amidotransferase) (GPATase)                                                                                    |
| 334 | 720 | 0.02 | A0A1D3L243 | <i>Methanobacterium congolense</i> | CTP synthase (EC 6.3.4.2) (Cytidine 5'-triphosphate synthase) (Cytidine triphosphate synthetase) (CTP synthetase) (CTPS) (UTP--ammonia ligase)                                                             |
| 335 | 720 | 0.02 | A0A1D3L4L0 | <i>Methanobacterium congolense</i> | Uncharacterized protein                                                                                                                                                                                    |
| 336 | 720 | 0.02 | A0A1D3L5D6 | <i>Methanobacterium congolense</i> | Uncharacterized protein                                                                                                                                                                                    |
| 337 | 717 | 0.02 | A0A1D3KZL5 | <i>Methanobacterium congolense</i> | Uncharacterized protein                                                                                                                                                                                    |
| 338 | 716 | 0.02 | A7I4Y1     | <i>Methanoregula boonei</i>        | Peptide chain release factor subunit 1 (Translation termination factor aRF1)                                                                                                                               |
| 339 | 715 | 0.02 | A7I754     | <i>Methanoregula boonei</i>        | Homospermidine synthase (EC 2.5.1.44)                                                                                                                                                                      |
| 340 | 714 | 0.02 | A0A1D3L546 | <i>Methanobacterium congolense</i> | Multifunctional fusion protein [Includes: ADP-dependent (S)-NAD(P)H-hydrate dehydratase (EC 4.2.1.136) (ADP-dependent NAD(P)HX dehydratase); NAD(P)H-hydrate epimerase (EC 5.1.99.6) (NAD(P)HX epimerase)] |
| 341 | 714 | 0.02 | A7I4K8     | <i>Methanoregula boonei</i>        | Amino acid permease-associated region                                                                                                                                                                      |
| 342 | 713 | 0.02 | A0A090I147 | <i>Methanobacterium formicicum</i> | DNA double-strand break repair Rad50 ATPase                                                                                                                                                                |
| 343 | 713 | 0.02 | A0A1D3L4C7 | <i>Methanobacterium congolense</i> | Transglutaminase domain-containing protein                                                                                                                                                                 |
| 344 | 713 | 0.02 | A7I8Z5     | <i>Methanoregula boonei</i>        | Glutamine synthetase (EC 6.3.1.2)                                                                                                                                                                          |
| 345 | 712 | 0.02 | A0A1D3KZK0 | <i>Methanobacterium congolense</i> | Glutamyl-tRNA(Gln) amidotransferase subunit E (Glu-ADT subunit E) (EC 6.3.5.-)                                                                                                                             |
| 346 | 712 | 0.02 | A0A1D3L103 | <i>Methanobacterium congolense</i> | Ferrous iron transport protein B                                                                                                                                                                           |
| 347 | 711 | 0.02 | A7I4C2     | <i>Methanoregula boonei</i>        | Uncharacterized protein                                                                                                                                                                                    |
| 348 | 710 | 0.02 | B8GJD9     | <i>Methanosphaerula palustris</i>  | Ferrous iron transport protein B                                                                                                                                                                           |
| 349 | 709 | 0.02 | A0A1D3L4N1 | <i>Methanobacterium congolense</i> | Type-2 serine--tRNA ligase (EC 6.1.1.11) (Seryl-tRNA synthetase) (SerRS) (Seryl-tRNA(Ser/Sec) synthetase)                                                                                                  |
| 350 | 707 | 0.02 | A0A1D3L0E2 | <i>Methanobacterium congolense</i> | Uncharacterized protein                                                                                                                                                                                    |
| 351 | 707 | 0.02 | A0A1D3L1P3 | <i>Methanobacterium congolense</i> | Putative MFS-type transporter EfpA                                                                                                                                                                         |
| 352 | 707 | 0.02 | A0A1D3L252 | <i>Methanobacterium congolense</i> | Putative ABC transporter ATP-binding protein MJ1662                                                                                                                                                        |
| 353 | 706 | 0.02 | A0A1D3L0B1 | <i>Methanobacterium congolense</i> | Probable cobyrinic acid synthase                                                                                                                                                                           |

|     |     |      |            |                                    |                                                                                                                                                                                                                                                                                   |
|-----|-----|------|------------|------------------------------------|-----------------------------------------------------------------------------------------------------------------------------------------------------------------------------------------------------------------------------------------------------------------------------------|
| 354 | 706 | 0.02 | A715H9     | <i>Methanoregula boonei</i>        | Phosphoribosylformylglycinamide synthase subunit PurL (FGAM synthase) (EC 6.3.5.3) (Formylglycinamide ribonucleotide amidotransferase subunit II) (FGAR amidotransferase II) (FGAR-AT II) (Glutamine amidotransferase PurL) (Phosphoribosylformylglycinamide synthase subunit II) |
| 355 | 706 | 0.02 | A718Y7     | <i>Methanoregula boonei</i>        | AMP-dependent synthetase and ligase                                                                                                                                                                                                                                               |
| 356 | 705 | 0.02 | A71860     | <i>Methanoregula boonei</i>        | Putative phosphoserine phosphatase                                                                                                                                                                                                                                                |
| 357 | 705 | 0.02 | A718N6     | <i>Methanoregula boonei</i>        | Methyl-accepting chemotaxis sensory transducer                                                                                                                                                                                                                                    |
| 358 | 704 | 0.02 | A0A1D3L4N6 | <i>Methanobacterium congolense</i> | Inositol-3-phosphate synthase (EC 5.5.1.4)                                                                                                                                                                                                                                        |
| 359 | 704 | 0.02 | A0A1D3L5C5 | <i>Methanobacterium congolense</i> | Magnesium transporter MgtE                                                                                                                                                                                                                                                        |
| 360 | 703 | 0.02 | A0A1D3L4B7 | <i>Methanobacterium congolense</i> | Uncharacterized protein                                                                                                                                                                                                                                                           |
| 361 | 702 | 0.02 | A0A1D3KZK6 | <i>Methanobacterium congolense</i> | Glutamate decarboxylase (EC 4.1.1.15)                                                                                                                                                                                                                                             |
| 362 | 702 | 0.02 | A0A1D3L3W8 | <i>Methanobacterium congolense</i> | Cation diffusion facilitator family transporter                                                                                                                                                                                                                                   |
| 363 | 702 | 0.02 | A0A1D3L5T3 | <i>Methanobacterium congolense</i> | Phosphoribosylamine--glycine ligase (EC 6.3.4.13) (GARS) (Glycinamide ribonucleotide synthetase) (Phosphoribosylglycinamide synthetase)                                                                                                                                           |
| 364 | 702 | 0.02 | A714W1     | <i>Methanoregula boonei</i>        | Glycosyl transferase, group 1                                                                                                                                                                                                                                                     |
| 365 | 702 | 0.02 | A717F2     | <i>Methanoregula boonei</i>        | Nitrogenase protein alpha chain (EC 1.18.6.1)                                                                                                                                                                                                                                     |
| 366 | 701 | 0.02 | A718Z7     | <i>Methanoregula boonei</i>        | Archaeal glutamate synthase [NADPH] (EC 1.4.1.13)                                                                                                                                                                                                                                 |
| 367 | 700 | 0.02 | A716J4     | <i>Methanoregula boonei</i>        | Uncharacterized protein                                                                                                                                                                                                                                                           |
| 368 | 699 | 0.02 | A0A1D3L065 | <i>Methanobacterium congolense</i> | Multidrug export protein EmrB                                                                                                                                                                                                                                                     |
| 369 | 699 | 0.02 | A0A1D3L0C2 | <i>Methanobacterium congolense</i> | Putative lon protease homolog (EC 3.4.21.-)                                                                                                                                                                                                                                       |
| 370 | 699 | 0.02 | A0A1D3L117 | <i>Methanobacterium congolense</i> | Uncharacterized protein                                                                                                                                                                                                                                                           |
| 371 | 698 | 0.02 | A0A1D3L1Y8 | <i>Methanobacterium congolense</i> | Putative O-antigen transporter                                                                                                                                                                                                                                                    |
| 372 | 698 | 0.02 | A0A1D3L2K6 | <i>Methanobacterium congolense</i> | Uncharacterized protein                                                                                                                                                                                                                                                           |
| 373 | 698 | 0.02 | A719L6     | <i>Methanoregula boonei</i>        | Response regulator receiver protein                                                                                                                                                                                                                                               |
| 374 | 698 | 0.02 | A71A07     | <i>Methanoregula boonei</i>        | Aminotransferase, class V                                                                                                                                                                                                                                                         |
| 375 | 698 | 0.02 | U6ED26     | <i>Methanobacterium sp.</i>        | ORC1-type DNA replication protein                                                                                                                                                                                                                                                 |
| 376 | 697 | 0.02 | A0A1D3L230 | <i>Methanobacterium congolense</i> | UvrABC system protein B (Protein UvrB) (Excinuclease ABC subunit B)                                                                                                                                                                                                               |
| 377 | 697 | 0.02 | A71890     | <i>Methanoregula boonei</i>        | Serine--tRNA ligase (EC 6.1.1.11) (Seryl-tRNA synthetase) (SerRS) (Seryl-tRNA(Ser/Sec) synthetase)                                                                                                                                                                                |

|     |     |      |            |                                    |                                                                                                                                                                                                                                                      |
|-----|-----|------|------------|------------------------------------|------------------------------------------------------------------------------------------------------------------------------------------------------------------------------------------------------------------------------------------------------|
| 378 | 696 | 0.02 | A0A1D3KZI2 | <i>Methanobacterium congolense</i> | Probable tRNA pseudouridine synthase D (EC 5.4.99.27) (tRNA pseudouridine(13) synthase) (tRNA pseudouridylate synthase D) (tRNA-uridine isomerase D)                                                                                                 |
| 379 | 695 | 0.02 | A0A1D3L064 | <i>Methanobacterium congolense</i> | UDP-N-acetylmuramate-L-alanine ligase (EC 6.3.2.8)                                                                                                                                                                                                   |
| 380 | 695 | 0.02 | A0A1D3L434 | <i>Methanobacterium congolense</i> | Putative sensor histidine kinase pdtaS (EC 2.7.13.3)                                                                                                                                                                                                 |
| 381 | 695 | 0.02 | A7I4X0     | <i>Methanoregula boonei</i>        | SufBD protein                                                                                                                                                                                                                                        |
| 382 | 695 | 0.02 | A7I5L0     | <i>Methanoregula boonei</i>        | Indolepyruvate oxidoreductase subunit lorA (IOR) (EC 1.2.7.8) (Indolepyruvate ferredoxin oxidoreductase subunit alpha)                                                                                                                               |
| 383 | 695 | 0.02 | A7I6I7     | <i>Methanoregula boonei</i>        | Adenosylhomocysteinase (EC 3.3.1.1)                                                                                                                                                                                                                  |
| 384 | 693 | 0.02 | A0A089Z8E6 | <i>Methanobacterium formicicum</i> | Histidine kinase/PAS domain-containing protein                                                                                                                                                                                                       |
| 385 | 693 | 0.02 | A0A1D3L510 | <i>Methanobacterium congolense</i> | Uncharacterized protein                                                                                                                                                                                                                              |
| 386 | 692 | 0.02 | A0A1D3KZC3 | <i>Methanobacterium congolense</i> | Glutamine synthetase (EC 6.3.1.2)                                                                                                                                                                                                                    |
| 387 | 691 | 0.02 | A0A1D3L1I3 | <i>Methanobacterium congolense</i> | Uncharacterized protein                                                                                                                                                                                                                              |
| 388 | 690 | 0.02 | A7I696     | <i>Methanoregula boonei</i>        | Argininosuccinate lyase (ASAL) (EC 4.3.2.1) (Arginosuccinase)                                                                                                                                                                                        |
| 389 | 690 | 0.02 | A7I6J3     | <i>Methanoregula boonei</i>        | Argininosuccinate synthase (EC 6.3.4.5) (Citrulline--aspartate ligase)                                                                                                                                                                               |
| 390 | 686 | 0.02 | A0A1D3KZC4 | <i>Methanobacterium congolense</i> | Inner membrane transport permease YbhR                                                                                                                                                                                                               |
| 391 | 686 | 0.02 | A7I8Z4     | <i>Methanoregula boonei</i>        | Ammonium transporter                                                                                                                                                                                                                                 |
| 392 | 685 | 0.02 | A0A090I3S9 | <i>Methanobacterium formicicum</i> | Putative copper-exporting P-type ATPase A                                                                                                                                                                                                            |
| 393 | 685 | 0.02 | A0A1D3KZ99 | <i>Methanobacterium congolense</i> | Lysine--tRNA ligase (EC 6.1.1.6) (Lysyl-tRNA synthetase) (LysRS)                                                                                                                                                                                     |
| 394 | 685 | 0.02 | A0A1D3L1N4 | <i>Methanobacterium congolense</i> | Signal transduction histidine kinase                                                                                                                                                                                                                 |
| 395 | 685 | 0.02 | A7I6P1     | <i>Methanoregula boonei</i>        | Carbon monoxide dehydrogenase (EC 1.2.7.4)                                                                                                                                                                                                           |
| 396 | 685 | 0.02 | A7I6C9     | <i>Methanoregula boonei</i>        | Bifunctional enzyme Fae/Hps [Includes: 5,6,7,8-tetrahydromethanopterin hydro-lyase (EC 4.2.1.147) (Formaldehyde-activating enzyme) (Fae); 3-hexulose-6-phosphate synthase (HPS) (EC 4.1.2.43) (D-arabino-3-hexulose-6-phosphate formaldehyde lyase)] |
| 397 | 685 | 0.02 | L0HFP5     | <i>Methanoregula formicica</i>     | Magnesium chelatase, H subunit                                                                                                                                                                                                                       |
| 398 | 684 | 0.02 | A0A1D3L3D7 | <i>Methanobacterium congolense</i> | Sodium/pantothenate symporter                                                                                                                                                                                                                        |
| 399 | 684 | 0.02 | A7I861     | <i>Methanoregula boonei</i>        | Cell division protein FtsZ                                                                                                                                                                                                                           |
| 400 | 683 | 0.02 | A0A1D3KZ61 | <i>Methanobacterium congolense</i> | 5'-deoxyadenosine deaminase (5'-dA deaminase) (EC 3.5.4.41)                                                                                                                                                                                          |
| 401 | 683 | 0.02 | A0A1D3KZT9 | <i>Methanobacterium congolense</i> | Mur ligase middle domain protein                                                                                                                                                                                                                     |
| 402 | 682 | 0.02 | A0A1D3L0F1 | <i>Methanobacterium congolense</i> | Uncharacterized protein                                                                                                                                                                                                                              |

|     |     |      |            |                                    |                                                                                                          |
|-----|-----|------|------------|------------------------------------|----------------------------------------------------------------------------------------------------------|
| 403 | 681 | 0.02 | L0HG11     | <i>Methanoregula formicica</i>     | Uncharacterized protein                                                                                  |
| 404 | 681 | 0.02 |            |                                    |                                                                                                          |
| 405 | 680 | 0.02 | A0A089ZVQ3 | <i>Methanobacterium formicicum</i> | Anti-sigma factor antagonist                                                                             |
| 406 | 680 | 0.02 | A0A1D3L3Q7 | <i>Methanobacterium congolense</i> | Putative methyltransferase PH0819 (EC 2.1.1.-)                                                           |
| 407 | 679 | 0.02 | A0A1D3L062 | <i>Methanobacterium congolense</i> | Putative transporter HI_0608                                                                             |
| 408 | 678 | 0.02 | A0A1D3L5I9 | <i>Methanobacterium congolense</i> | tRNA pseudouridine synthase Pus10 (EC 5.4.99.25) (tRNA pseudouridine 54/55 synthase) (Psi54/55 synthase) |
| 409 | 677 | 0.02 | A0A1D3KZ70 | <i>Methanobacterium congolense</i> | Outer membrane protein assembly factor BamB                                                              |
| 410 | 677 | 0.02 | A7IA49     | <i>Methanoregula boonei</i>        | Aminotransferase, class I and II                                                                         |
| 411 | 676 | 0.02 | A0A1D3L490 | <i>Methanobacterium congolense</i> | Lactaldehyde dehydrogenase (EC 1.2.1.22)                                                                 |
| 412 | 675 | 0.02 | A7I9F2     | <i>Methanoregula boonei</i>        | Small GTP-binding protein                                                                                |
| 413 | 674 | 0.02 | A0A090JY84 | <i>Methanobacterium formicicum</i> | Transposase                                                                                              |
| 414 | 674 | 0.02 | A7I6B3     | <i>Methanoregula boonei</i>        | ABC transporter related                                                                                  |
| 415 | 673 | 0.02 | A0A1D3KZ75 | <i>Methanobacterium congolense</i> | Cobyrinate a,c-diamide synthase (EC 6.3.5.11) (Cobyrinic acid a,c-diamide synthetase)                    |
| 416 | 673 | 0.02 | A7I7B2     | <i>Methanoregula boonei</i>        | Ribulose biphosphate carboxylase (RuBisCO) (EC 4.1.1.39)                                                 |
| 417 | 672 | 0.02 | A7I5N4     | <i>Methanoregula boonei</i>        | Cell division GTPase-like protein                                                                        |
| 418 | 671 | 0.02 | A7I630     | <i>Methanoregula boonei</i>        | Pyruvate flavodoxin/ferredoxin oxidoreductase domain protein                                             |
| 419 | 670 | 0.02 | A7I6E9     | <i>Methanoregula boonei</i>        | Uncharacterized protein                                                                                  |
| 420 | 669 | 0.02 | A0A1D3KYZ1 | <i>Methanobacterium congolense</i> | HAD superfamily hydrolase                                                                                |
| 421 | 669 | 0.02 | A0A1D3KZ06 | <i>Methanobacterium congolense</i> | Tryptophan synthase beta chain (EC 4.2.1.20)                                                             |
| 422 | 669 | 0.02 | A0A1D3L563 | <i>Methanobacterium congolense</i> | Putative cysteine desulfurase (EC 2.8.1.7)                                                               |
| 423 | 668 | 0.02 | A0A089Z880 | <i>Methanobacterium formicicum</i> | TrmB family transcriptional regulator                                                                    |
| 424 | 668 | 0.02 | A0A1D3L3U4 | <i>Methanobacterium congolense</i> | Integrase                                                                                                |
| 425 | 668 | 0.02 | A7I803     | <i>Methanoregula boonei</i>        | Uncharacterized protein                                                                                  |
| 426 | 668 | 0.02 | A7I9I1     | <i>Methanoregula boonei</i>        | Signal recognition particle 54 kDa protein (SRP54)                                                       |
| 427 | 668 | 0.02 | A7IAK3     | <i>Methanoregula boonei</i>        | 50S ribosomal protein L10 (Acidic ribosomal protein P0 homolog)                                          |
| 428 | 667 | 0.02 | A0A1D3L472 | <i>Methanobacterium congolense</i> | D-3-phosphoglycerate dehydrogenase (EC 1.1.1.95)                                                         |

|     |     |      |            |                                               |                                                                                                                                                                                        |
|-----|-----|------|------------|-----------------------------------------------|----------------------------------------------------------------------------------------------------------------------------------------------------------------------------------------|
| 429 | 667 | 0.02 | A717F4     | <i>Methanoregula boonei</i>                   | Nitrogenase MoFe cofactor biosynthesis protein NifE (EC 1.18.6.1)                                                                                                                      |
| 430 | 666 | 0.02 | A715V0     | <i>Methanoregula boonei</i>                   | Formylmethanofuran--tetrahydromethanopterin formyltransferase (EC 2.3.1.101) (H4MPT formyltransferase)                                                                                 |
| 431 | 666 | 0.02 | A71B58     | <i>Methanoregula boonei</i>                   | Tyrosine--tRNA ligase (EC 6.1.1.1) (Tyrosyl-tRNA synthetase) (TyrRS)                                                                                                                   |
| 432 | 665 | 0.02 | A0A090I4C4 | <i>Methanobacterium formicicum</i>            | Uncharacterized protein                                                                                                                                                                |
| 433 | 665 | 0.02 | A0A1D3KZ83 | <i>Methanobacterium congolense</i>            | Adenylosuccinate lyase (ASL) (EC 4.3.2.2) (Adenylosuccinase)                                                                                                                           |
| 434 | 665 | 0.02 | A0A1D3L2M9 | <i>Methanobacterium congolense</i>            | Phenylalanine--tRNA ligase beta subunit (EC 6.1.1.20) (Phenylalanyl-tRNA synthetase beta subunit) (PheRS)                                                                              |
| 435 | 665 | 0.02 | U6EDF8     | <i>Methanobacterium sp.</i>                   | UvrABC system protein A (UvrA protein) (Excinuclease ABC subunit A)                                                                                                                    |
| 436 | 664 | 0.02 | A0A089ZAN7 | <i>Methanobacterium formicicum</i>            | Phosphoenolpyruvate synthase/pyruvate phosphate dikinase                                                                                                                               |
| 437 | 664 | 0.02 | A0A089ZV30 | <i>Methanobacterium formicicum</i>            | Phosphoenolpyruvate synthase (PEP synthase) (EC 2.7.9.2) (Pyruvate, water dikinase)                                                                                                    |
| 438 | 663 | 0.02 | U6EE51     | <i>Methanobacterium sp.</i>                   | Acetyl-CoA decarbonylase/synthase complex subunit alpha (ACDS complex subunit alpha) (EC 1.2.7.4) (ACDS complex carbon monoxide dehydrogenase subunit alpha) (ACDS CODH subunit alpha) |
| 439 | 660 | 0.02 | A0A089ZVC2 | <i>Methanobacterium formicicum</i>            | CoB--CoM heterodisulfide reductase subunit A HdrA1 (Methyl-viologen-reducing hydrogenase subunit delta)                                                                                |
| 440 | 660 | 0.02 | A717M3     | <i>Methanoregula boonei</i>                   | DNA mismatch repair protein MutS                                                                                                                                                       |
| 441 | 659 | 0.02 | A0A1D3KZ63 | <i>Methanobacterium congolense</i>            | Bacterial Ig-like domain (Group 3)                                                                                                                                                     |
| 442 | 659 | 0.02 | A0A1D3L3L2 | <i>Methanobacterium congolense</i>            | Putative iron-sulfur protein MMP1067                                                                                                                                                   |
| 443 | 659 | 0.02 | A0A1D3L4E2 | <i>Methanobacterium congolense</i>            | RNA-metabolising metallo-beta-lactamase                                                                                                                                                |
| 444 | 659 | 0.02 | U6EFC2     | <i>Methanobacterium sp.</i>                   | Helicase                                                                                                                                                                               |
| 445 | 658 | 0.02 | O27035     | <i>Methanothermobacter thermautotrophicus</i> | V-type ATP synthase beta chain (V-ATPase subunit B)                                                                                                                                    |
| 446 | 657 | 0.02 | A0A090JTH0 | <i>Methanobacterium formicicum</i>            | Uncharacterized protein                                                                                                                                                                |
| 447 | 657 | 0.02 | A0A1D3L3Q2 | <i>Methanobacterium congolense</i>            | Argininosuccinate lyase (ASAL) (EC 4.3.2.1) (Arginosuccinase)                                                                                                                          |
| 448 | 657 | 0.02 | A714B6     | <i>Methanoregula boonei</i>                   | Aminotransferase, class V                                                                                                                                                              |
| 449 | 656 | 0.02 | A0A1D3KZD9 | <i>Methanobacterium congolense</i>            | Uncharacterized protein                                                                                                                                                                |
| 450 | 655 | 0.02 | A0A1D3L3K2 | <i>Methanobacterium congolense</i>            | F420-non-reducing hydrogenase vhc subunit A (EC 1.12.99.-)                                                                                                                             |
| 451 | 655 | 0.02 | A0A1D3L4Y2 | <i>Methanobacterium congolense</i>            | Multidrug export protein EmrB                                                                                                                                                          |
| 452 | 654 | 0.02 | L0HF89     | <i>Methanoregula formicica</i>                | Formylmethanofuran dehydrogenase subunit B                                                                                                                                             |

|     |     |      |            |                                    |                                                                                                                                                                                                                                       |
|-----|-----|------|------------|------------------------------------|---------------------------------------------------------------------------------------------------------------------------------------------------------------------------------------------------------------------------------------|
| 453 | 653 | 0.02 | A0A1D3L5K3 | <i>Methanobacterium congolense</i> | Putative NADH oxidase (EC 1.6.99.3)                                                                                                                                                                                                   |
| 454 | 652 | 0.02 | A0A1D3L2P8 | <i>Methanobacterium congolense</i> | Polysaccharide biosynthesis protein                                                                                                                                                                                                   |
| 455 | 651 | 0.02 | A0A1D3KZS3 | <i>Methanobacterium congolense</i> | Ketisovalerate oxidoreductase subunit VorA (EC 1.-.-.-)                                                                                                                                                                               |
| 456 | 651 | 0.02 | A0A1D3L3Y3 | <i>Methanobacterium congolense</i> | Signal recognition particle receptor FtsY (SRP receptor)                                                                                                                                                                              |
| 457 | 650 | 0.02 | A0A1D3L131 | <i>Methanobacterium congolense</i> | 7,8-dihydro-6-hydroxymethylpterin dimethyltransferase (EC 2.1.1.-)                                                                                                                                                                    |
| 458 | 650 | 0.02 | A0A1D3L1Q0 | <i>Methanobacterium congolense</i> | Thermosome subunit alpha                                                                                                                                                                                                              |
| 459 | 648 | 0.02 | A0A1D3L0Z3 | <i>Methanobacterium congolense</i> | Thermosome subunit beta                                                                                                                                                                                                               |
| 460 | 648 | 0.02 | A7I922     | <i>Methanoregula boonei</i>        | Inosine-5'-monophosphate dehydrogenase (IMP dehydrogenase) (IMPD) (IMPDH) (EC 1.1.1.205)                                                                                                                                              |
| 461 | 648 | 0.02 | A7I942     | <i>Methanoregula boonei</i>        | Type 2 DNA topoisomerase 6 subunit A (EC 5.99.1.3) (Type II DNA topoisomerase VI subunit A)                                                                                                                                           |
| 462 | 647 | 0.02 | A0A1D3L414 | <i>Methanobacterium congolense</i> | Uncharacterized protein                                                                                                                                                                                                               |
| 463 | 646 | 0.02 | A7I8B3     | <i>Methanoregula boonei</i>        | Ppx/GppA phosphatase                                                                                                                                                                                                                  |
| 464 | 646 | 0.02 |            |                                    |                                                                                                                                                                                                                                       |
| 465 | 645 | 0.02 | A0A1D2WDD6 | <i>Methanobacterium sp.</i>        | Nitrogenase iron-molybdenum cofactor biosynthesis protein NifN                                                                                                                                                                        |
| 466 | 645 | 0.02 | A7I4T9     | <i>Methanoregula boonei</i>        | Anthranilate synthase component 1 (EC 4.1.3.27)                                                                                                                                                                                       |
| 467 | 644 | 0.02 | A7IAL8     | <i>Methanoregula boonei</i>        | Cell division protein FtsZ                                                                                                                                                                                                            |
| 468 | 643 | 0.02 | A0A090I3K9 | <i>Methanobacterium formicicum</i> | Nitrogenase beta subunit NifK (Nitrogenase molybdenum-iron protein beta chain) (EC 1.18.6.1)                                                                                                                                          |
| 469 | 642 | 0.02 | A7I5S3     | <i>Methanoregula boonei</i>        | Tetrahydromethanopterin S-methyltransferase, MtrH subunit                                                                                                                                                                             |
| 470 | 642 | 0.02 | A7I928     | <i>Methanoregula boonei</i>        | Uncharacterized protein                                                                                                                                                                                                               |
| 471 | 641 | 0.02 | A0A1D3KZK7 | <i>Methanobacterium congolense</i> | 2-oxoglutarate synthase subunit KorA (EC 1.2.7.3)                                                                                                                                                                                     |
| 472 | 640 | 0.02 | A7I4L8     | <i>Methanoregula boonei</i>        | Thiolase                                                                                                                                                                                                                              |
| 473 | 639 | 0.02 | A0A1D3L1H8 | <i>Methanobacterium congolense</i> | Uncharacterized protein                                                                                                                                                                                                               |
| 474 | 639 | 0.02 | A0A1D3L4R5 | <i>Methanobacterium congolense</i> | Putative sensor histidine kinase pdtaS (EC 2.7.13.3)                                                                                                                                                                                  |
| 475 | 638 | 0.02 | A0A090I199 | <i>Methanobacterium formicicum</i> | Uncharacterized protein                                                                                                                                                                                                               |
| 476 | 636 | 0.02 | A7I4V1     | <i>Methanoregula boonei</i>        | Probable bifunctional tRNA threonylcarbamoyladenine biosynthesis protein [Includes: Serine/threonine-protein kinase Bud32 (EC 2.7.11.1); tRNA N6-adenosine threonylcarbamoyltransferase (EC 2.3.1.234) (tRNA threonylcarbamoyladenine |

|     |     |      |            |                                    |                                                                                                                                                                                             |
|-----|-----|------|------------|------------------------------------|---------------------------------------------------------------------------------------------------------------------------------------------------------------------------------------------|
|     |     |      |            |                                    | biosynthesis protein Kae1 (t(6)A37 threonylcarbamoyladenine biosynthesis protein Kae1)]                                                                                                     |
| 477 | 635 | 0.02 | A0A090I2N5 | <i>Methanobacterium formicicum</i> | Putative secreted protein                                                                                                                                                                   |
| 478 | 635 | 0.02 | A0A1D3L0L5 | <i>Methanobacterium congolense</i> | Multidrug resistance protein Stp                                                                                                                                                            |
| 479 | 635 | 0.02 | A0A1D3L526 | <i>Methanobacterium congolense</i> | Uncharacterized protein                                                                                                                                                                     |
| 480 | 635 | 0.02 | A7I5X5     | <i>Methanoregula boonei</i>        | Uncharacterized protein                                                                                                                                                                     |
| 481 | 635 | 0.02 | A7I8W3     | <i>Methanoregula boonei</i>        | Uncharacterized protein                                                                                                                                                                     |
| 482 | 634 | 0.02 | A0A1D3KZA6 | <i>Methanobacterium congolense</i> | Phenylacetate-coenzyme A ligase (EC 6.2.1.30)                                                                                                                                               |
| 483 | 634 | 0.02 | A0A1D3L4S7 | <i>Methanobacterium congolense</i> | Glucose-methanol-choline oxidoreductase                                                                                                                                                     |
| 484 | 634 | 0.02 | A7IB51     | <i>Methanoregula boonei</i>        | Elongation factor Tu, domain 2 protein                                                                                                                                                      |
| 485 | 634 | 0.02 | F6D5H0     | <i>Methanobacterium paludis</i>    | DNA repair and recombination protein RadA                                                                                                                                                   |
| 486 | 633 | 0.02 | A0A1D3KZ90 | <i>Methanobacterium congolense</i> | Phosphomethylpyrimidine synthase (EC 4.1.99.17) (Hydroxymethylpyrimidine phosphate synthase) (HMP-P synthase) (HMP-phosphate synthase) (HMPP synthase) (Thiamine biosynthesis protein ThiC) |
| 487 | 633 | 0.02 | A0A1D3L3N9 | <i>Methanobacterium congolense</i> | Putative methyltransferase PH0819 (EC 2.1.1.-)                                                                                                                                              |
| 488 | 633 | 0.02 | A0A1D3L571 | <i>Methanobacterium congolense</i> | Serine hydroxymethyltransferase (SHMT) (Serine methylase) (EC 2.1.2.-)                                                                                                                      |
| 489 | 632 | 0.02 | A0A089ZUV6 | <i>Methanobacterium formicicum</i> | Uncharacterized protein                                                                                                                                                                     |
| 490 | 632 | 0.02 | A0A090I3G7 | <i>Methanobacterium formicicum</i> | CoB--CoM heterodisulfide reductase subunit A HdrA2 (CoB-CoM heterodisulfide reductase iron-sulfur subunit A) (EC 1.8.98.1)                                                                  |
| 491 | 632 | 0.02 | A0A1D3L152 | <i>Methanobacterium congolense</i> | Putative threonylcarbamoyladenine tRNA methylthiotransferase (EC 2.8.4.5)                                                                                                                   |
| 492 | 631 | 0.02 | A7I5J3     | <i>Methanoregula boonei</i>        | AAA ATPase, central domain protein                                                                                                                                                          |
| 493 | 630 | 0.02 | A0A1D3L0F7 | <i>Methanobacterium congolense</i> | DNA double-strand break repair Rad50 ATPase                                                                                                                                                 |
| 494 | 630 | 0.02 | A0A1D3L3I9 | <i>Methanobacterium congolense</i> | Aminotransferase (EC 2.6.1.-)                                                                                                                                                               |
| 495 | 630 | 0.02 | A0A1D3L3J9 | <i>Methanobacterium congolense</i> | Replication factor C large subunit (RFC large subunit) (Clamp loader large subunit)                                                                                                         |
| 496 | 630 | 0.02 | A0A1D3L557 | <i>Methanobacterium congolense</i> | Polysaccharide pyruvyl transferase                                                                                                                                                          |
| 497 | 629 | 0.02 | A0A1D3L4Y5 | <i>Methanobacterium congolense</i> | Putative NOP5 family protein MJ0694                                                                                                                                                         |
| 498 | 628 | 0.02 | L0HKB8     | <i>Methanoregula formicica</i>     | Uncharacterized protein                                                                                                                                                                     |
| 499 | 627 | 0.02 | A0A1D3L0I6 | <i>Methanobacterium congolense</i> | Putative methyltransferase PH0819 (EC 2.1.1.-)                                                                                                                                              |
| 500 | 627 | 0.02 | A0A1D3L0M7 | <i>Methanobacterium congolense</i> | Putative MFS-type transporter YusP                                                                                                                                                          |





**Table S4c.** Functional overview of M1P community (top 500 rank only).

| Rank | Count | Abundance | ID         | Organism                              | Protein Names                                                             |
|------|-------|-----------|------------|---------------------------------------|---------------------------------------------------------------------------|
| 1    | 2377  | 0.09      | A0A023UP33 | <i>Magnusiomyces ingens</i>           | Uncharacterized protein (Fragment)                                        |
| 2    | 1524  | 0.06      | A0A023UP27 | <i>Magnusiomyces ingens</i>           | Uncharacterized protein                                                   |
| 3    | 1277  | 0.05      | A0A1Q3M6H6 | <i>Bacteroidales bacterium</i>        | CRISPR-associated endonuclease Cas9 (EC 3.1.-.-)                          |
| 4    | 957   | 0.03      | E4T3F9     | <i>Paludibacter propionigenes</i>     | Glutamate synthase (NADH) large subunit (EC 1.4.1.14) (EC 1.4.7.1)        |
| 5    | 942   | 0.03      | I9R3U4     | <i>Bacteroides cellulosilyticus</i>   | Uncharacterized protein                                                   |
| 6    | 926   | 0.03      | A0A023UMT3 | <i>Magnusiomyces ingens</i>           | Uncharacterized protein (Fragment)                                        |
| 7    | 913   | 0.03      | Q8VQM8     | <i>Prevotella intermedia</i>          | Mobilization protein                                                      |
| 8    | 858   | 0.03      | A0A023UMS7 | <i>Magnusiomyces ingens</i>           | NADH-ubiquinone oxidoreductase chain 5 (EC 1.6.5.3)                       |
| 9    | 815   | 0.03      | A0A1J5AN19 | <i>Bacteroidetes bacterium</i>        | IS110 family transposase                                                  |
| 10   | 790   | 0.03      | K9L3G6     | <i>Magnusiomyces magnusii</i>         | Cytochrome b                                                              |
| 11   | 765   | 0.03      | E4T8J6     | <i>Paludibacter propionigenes</i>     | Cell surface receptor IPT/TIG domain protein                              |
| 12   | 680   | 0.02      | E4T5D1     | <i>Paludibacter propionigenes</i>     | Methionine--tRNA ligase (EC 6.1.1.10) (Methionyl-tRNA synthetase) (MetRS) |
| 13   | 661   | 0.02      | A0A023UP41 | <i>Magnusiomyces ingens</i>           | Cytochrome c oxidase subunit 1 (EC 1.9.3.1)                               |
| 14   | 651   | 0.02      | A0A023UPJ4 | <i>Magnusiomyces ingens</i>           | Uncharacterized protein (Fragment)                                        |
| 15   | 644   | 0.02      | G0IXG6     | <i>Cyclobacterium marinum</i>         | Transposase IS116/IS110/IS902 family protein                              |
| 16   | 644   | 0.02      |            |                                       |                                                                           |
| 17   | 630   | 0.02      | A0A1L9GVN0 | <i>Cand. Micrarchaeum acidiphilum</i> | Uncharacterized protein                                                   |
| 18   | 616   | 0.02      | F0FB90     | <i>Prevotella multiformis</i>         | Initiator RepB protein (Fragment)                                         |
| 19   | 611   | 0.02      | A0A1T5HUH3 | <i>Alkalitalea saponilacus</i>        | Uncharacterized protein                                                   |
| 20   | 606   | 0.02      | A0A023UM92 | <i>Magnusiomyces ingens</i>           | Uncharacterized protein                                                   |
| 21   | 600   | 0.02      | F3ZQL8     | <i>Bacteroides coprosuis</i>          | Transposase IS4 family protein                                            |
| 22   | 598   | 0.02      | A0A1M3DNL6 | <i>Bacteroidales bacterium</i>        | IS4 family transposase                                                    |
| 23   | 581   | 0.02      | A0A0D2WNJ4 | <i>Capsaspora owczarzaki</i>          | Paramyosin                                                                |
| 24   | 581   | 0.02      | A0A1Q3M3N2 | <i>Bacteroidales bacterium</i>        | Uncharacterized protein (Fragment)                                        |
| 25   | 577   | 0.02      |            |                                       |                                                                           |

|    |     |      |            |                                     |                                                                                                                                      |
|----|-----|------|------------|-------------------------------------|--------------------------------------------------------------------------------------------------------------------------------------|
| 26 | 561 | 0.02 | F0FB88     | <i>Prevotella multiformis</i>       | Putative plasmid recombination enzyme                                                                                                |
| 27 | 549 | 0.02 | A0A060RAF8 | <i>Mucinivorans hirudinis</i>       | Mobile element protein                                                                                                               |
| 28 | 539 | 0.02 | A0A0D8Y6E2 | <i>Dictyocaulus viviparus</i>       | Uncharacterized protein                                                                                                              |
| 29 | 538 | 0.02 | A0A0U1CQ28 | <i>Chlamydia trachomatis</i>        | Replication protein                                                                                                                  |
| 30 | 509 | 0.02 |            |                                     |                                                                                                                                      |
| 31 | 502 | 0.02 | A0A1J5HM76 | <i>Porphyromonadaceae bacterium</i> | Multidrug transporter AcrB                                                                                                           |
| 32 | 498 | 0.02 | E4T5D5     | <i>Paludibacter propionigenes</i>   | DNA-directed DNA polymerase (EC 2.7.7.7)                                                                                             |
| 33 | 490 | 0.02 | A0A023UP13 | <i>Magnusiomyces ingens</i>         | NADH-ubiquinone oxidoreductase chain 4 (EC 1.6.5.3)                                                                                  |
| 34 | 471 | 0.02 | A0A023UM78 | <i>Magnusiomyces ingens</i>         | NADH dehydrogenase subunit 2 (EC 1.6.5.3)                                                                                            |
| 35 | 463 | 0.02 | A0A1J5HWN1 | <i>Porphyromonadaceae bacterium</i> | Uncharacterized protein                                                                                                              |
| 36 | 452 | 0.02 | E4T5Y5     | <i>Paludibacter propionigenes</i>   | Multifunctional fusion protein [Includes: Protein translocase subunit SecD; Protein-export membrane protein SecF]                    |
| 37 | 448 | 0.02 | E4T072     | <i>Paludibacter propionigenes</i>   | Pyruvate, phosphate dikinase (EC 2.7.9.1)                                                                                            |
| 38 | 436 | 0.02 | A0A1Q3M3K5 | <i>Bacteroidales bacterium</i>      | Alpha-mannosidase                                                                                                                    |
| 39 | 431 | 0.02 | A0A0L8VCE1 | <i>Sunxiuqinia dokdonensis</i>      | Multidrug transporter AcrB                                                                                                           |
| 40 | 430 | 0.02 | A0A023UNG0 | <i>Magnusiomyces ingens</i>         | Uncharacterized protein (Fragment)                                                                                                   |
| 41 | 425 | 0.02 | A0A1M3MCY6 | <i>Paludibacter sp.</i>             | Glycosyl hydrolase                                                                                                                   |
| 42 | 423 | 0.02 | A0A1J5HGG6 | <i>Porphyromonadaceae bacterium</i> | DNA-directed RNA polymerase subunit beta (RNAP subunit beta) (EC 2.7.7.6) (RNA polymerase subunit beta) (Transcriptase subunit beta) |
| 43 | 420 | 0.02 | A0A1Q3LCT2 | <i>Bacteroidales bacterium</i>      | Cell filamentation protein Fic                                                                                                       |
| 44 | 420 | 0.02 | W0JMT5     | <i>Desulfurella acetivorans</i>     | Uncharacterized protein                                                                                                              |
| 45 | 419 | 0.02 | A0A142L3A0 | <i>Bacteroidetes bacterium</i>      | DEAD/DEAH box helicase                                                                                                               |
| 46 | 419 | 0.02 | A0A1M3MBI7 | <i>Paludibacter sp.</i>             | Cell surface protein SprA                                                                                                            |
| 47 | 418 | 0.02 | Q8VQM9     | <i>Prevotella intermedia</i>        | Replication protein                                                                                                                  |
| 48 | 415 | 0.02 | A0A0U1CQ01 | <i>Chlamydia trachomatis</i>        | Uncharacterised protein                                                                                                              |
| 49 | 413 | 0.01 |            |                                     |                                                                                                                                      |
| 50 | 405 | 0.01 | F3PIP2     | <i>Bacteroides clarus</i>           | TonB-dependent receptor plug domain protein                                                                                          |
| 51 | 403 | 0.01 | A0A1Q3M633 | <i>Bacteroidales bacterium</i>      | ATP-dependent helicase                                                                                                               |

|    |     |      |            |                                          |                                                                                                                                          |
|----|-----|------|------------|------------------------------------------|------------------------------------------------------------------------------------------------------------------------------------------|
| 52 | 401 | 0.01 | E4T570     | <i>Paludibacter propionicipigenes</i>    | DNA-directed RNA polymerase subunit beta (RNAP subunit beta) (EC 2.7.7.6) (RNA polymerase subunit beta) (Transcriptase subunit beta)     |
| 53 | 400 | 0.01 | A0A0T5VPL4 | <i>Pedobacter ginsenosidimutans</i>      | Uncharacterized protein                                                                                                                  |
| 54 | 399 | 0.01 | A0A1Q3M5E8 | <i>Bacteroidales bacterium</i>           | Uncharacterized protein (Fragment)                                                                                                       |
| 55 | 398 | 0.01 | E4T450     | <i>Paludibacter propionicipigenes</i>    | UvrABC system protein A                                                                                                                  |
| 56 | 398 | 0.01 | N8ZVC9     | <i>Acinetobacter gernerii</i>            | Uncharacterized protein                                                                                                                  |
| 57 | 395 | 0.01 | U6RAE1     | <i>Bacteroides sp.</i>                   | Uncharacterized protein                                                                                                                  |
| 58 | 394 | 0.01 | E4T0X8     | <i>Paludibacter propionicipigenes</i>    | DNA helicase (EC 3.6.4.12)                                                                                                               |
| 59 | 390 | 0.01 | A0A1M3DJX9 | <i>Bacteroidales bacterium</i>           | Beta-galactosidase (EC 3.2.1.23) (Lactase)                                                                                               |
| 60 | 390 | 0.01 | A0A1Q3M609 | <i>Bacteroidales bacterium</i>           | Uncharacterized protein                                                                                                                  |
| 61 | 388 | 0.01 | A0A0Q7S8L4 | <i>Pelomonas sp.</i>                     | Transposase                                                                                                                              |
| 62 | 387 | 0.01 | E4T2R0     | <i>Paludibacter propionicipigenes</i>    | ATPase AAA-2 domain protein                                                                                                              |
| 63 | 384 | 0.01 | A0A1J5HA84 | <i>Porphyromonadaceae bacterium</i>      | Potassium transporter                                                                                                                    |
| 64 | 383 | 0.01 | A0A1M3DC14 | <i>Bacteroidales bacterium</i>           | Formate C-acetyltransferase                                                                                                              |
| 65 | 382 | 0.01 | A0A023UPL4 | <i>Magnusiomyces ingens</i>              | Uncharacterized protein (Fragment)                                                                                                       |
| 66 | 379 | 0.01 | A0A016UCK1 | <i>Ancylostoma ceylanicum</i>            | Uncharacterized protein                                                                                                                  |
| 67 | 378 | 0.01 | A0A0T5VFN0 | <i>Pedobacter ginsenosidimutans</i>      | SusC/RagA family TonB-linked outer membrane protein                                                                                      |
| 68 | 377 | 0.01 | E4T3F8     | <i>Paludibacter propionicipigenes</i>    | L-glutamine synthetase (EC 6.3.1.2)                                                                                                      |
| 69 | 375 | 0.01 | E4T1A7     | <i>Paludibacter propionicipigenes</i>    | Pyruvate phosphate dikinase PEP/pyruvate-binding protein                                                                                 |
| 70 | 364 | 0.01 | E4T5C1     | <i>Paludibacter propionicipigenes</i>    | DNA topoisomerase IV subunit A (EC 5.99.1.3)                                                                                             |
| 71 | 363 | 0.01 | A0A1R3T9L6 | <i>Proteiniphilum saccharofermentans</i> | Transposase IS4 family protein                                                                                                           |
| 72 | 360 | 0.01 | A0A1J5HML6 | <i>Porphyromonadaceae bacterium</i>      | Penicillin-binding protein                                                                                                               |
| 73 | 360 | 0.01 | E4T3R4     | <i>Paludibacter propionicipigenes</i>    | AMP-dependent synthetase and ligase                                                                                                      |
| 74 | 359 | 0.01 | E4T571     | <i>Paludibacter propionicipigenes</i>    | DNA-directed RNA polymerase subunit beta' (RNAP subunit beta') (EC 2.7.7.6) (RNA polymerase subunit beta') (Transcriptase subunit beta') |
| 75 | 358 | 0.01 | A0A1M3MAE9 | <i>Paludibacter sp.</i>                  | DNA-directed RNA polymerase subunit beta' (RNAP subunit beta') (EC 2.7.7.6) (RNA polymerase subunit beta') (Transcriptase subunit beta') |
| 76 | 358 | 0.01 | W1I7F0     | <i>uncultured bacterium</i>              | Uncultured bacterium extrachromosomal DNA RGI01790                                                                                       |

|     |     |      |            |                                       |                                                                                                                                                                                                   |
|-----|-----|------|------------|---------------------------------------|---------------------------------------------------------------------------------------------------------------------------------------------------------------------------------------------------|
| 77  | 357 | 0.01 | E4T8D5     | <i>Paludibacter propionicipigenes</i> | Orn/DAP/Arg decarboxylase 2                                                                                                                                                                       |
| 78  | 355 | 0.01 | A0A1E4ELA1 | <i>Paludibacter sp.</i>               | Dihydrodipicolinate synthase family protein                                                                                                                                                       |
| 79  | 352 | 0.01 | E4T3X9     | <i>Paludibacter propionicipigenes</i> | DNA topoisomerase III (EC 5.99.1.2)                                                                                                                                                               |
| 80  | 351 | 0.01 | A0A1J5HT60 | <i>Porphyromonadaceae bacterium</i>   | DNA polymerase I (EC 2.7.7.7)                                                                                                                                                                     |
| 81  | 351 | 0.01 | A0A1M3DNS5 | <i>Bacteroidales bacterium</i>        | Putative K(+)-stimulated pyrophosphate-energized sodium pump (EC 3.6.1.1) (Membrane-bound sodium-translocating pyrophosphatase) (Pyrophosphate-energized inorganic pyrophosphatase) (Na(+)-PPase) |
| 82  | 350 | 0.01 | R6DEG5     | <i>Bacteroides sp.</i>                | RagB/SusD domain-containing protein                                                                                                                                                               |
| 83  | 349 | 0.01 | A0A1Q3LBC0 | <i>Bacteroidales bacterium</i>        | Uncharacterized protein                                                                                                                                                                           |
| 84  | 347 | 0.01 | E4T653     | <i>Paludibacter propionicipigenes</i> | Peptidoglycan glycosyltransferase (EC 2.4.1.129)                                                                                                                                                  |
| 85  | 342 | 0.01 | E4T2N1     | <i>Paludibacter propionicipigenes</i> | DNA gyrase subunit A (EC 5.99.1.3)                                                                                                                                                                |
| 86  | 341 | 0.01 | K9L3F4     | <i>Magnusiomyces magnusii</i>         | NADH-ubiquinone oxidoreductase chain 1 (EC 1.6.5.3)                                                                                                                                               |
| 87  | 340 | 0.01 | E4T1U6     | <i>Paludibacter propionicipigenes</i> | Carbamoyl-phosphate synthase L chain ATP-binding protein (EC 6.4.1.1)                                                                                                                             |
| 88  | 339 | 0.01 | E4T5N8     | <i>Paludibacter propionicipigenes</i> | UvrABC system protein A                                                                                                                                                                           |
| 89  | 339 | 0.01 | F4GG80     | <i>Alicyclophilus denitrificans</i>   | Transposase IS4 family protein                                                                                                                                                                    |
| 90  | 338 | 0.01 | E4T2H4     | <i>Paludibacter propionicipigenes</i> | Phosphoribosylformylglycinamide synthase (FGAM synthase) (FGAMS) (EC 6.3.5.3) (Formylglycinamide ribonucleotide amidotransferase) (FGAR amidotransferase) (FGAR-AT)                               |
| 91  | 336 | 0.01 | A0A023UMR4 | <i>Magnusiomyces ingens</i>           | NADH-ubiquinone oxidoreductase chain 3 (EC 1.6.5.3)                                                                                                                                               |
| 92  | 335 | 0.01 | A0A1M3M9Z9 | <i>Paludibacter sp.</i>               | Uncharacterized protein                                                                                                                                                                           |
| 93  | 333 | 0.01 | A0A023UP21 | <i>Magnusiomyces ingens</i>           | Ribosomal protein S3                                                                                                                                                                              |
| 94  | 327 | 0.01 | A0A1J5H765 | <i>Porphyromonadaceae bacterium</i>   | Multifunctional fusion protein [Includes: Protein translocase subunit SecD; Protein-export membrane protein SecF]                                                                                 |
| 95  | 327 | 0.01 | A0A1J5HIK6 | <i>Porphyromonadaceae bacterium</i>   | UDP-N-acetylglucosamine 2-epimerase                                                                                                                                                               |
| 96  | 327 | 0.01 | E4T7X4     | <i>Paludibacter propionicipigenes</i> | Alanine--tRNA ligase (EC 6.1.1.7) (Alanyl-tRNA synthetase) (AlaRS)                                                                                                                                |
| 97  | 326 | 0.01 | A0A1J5HBV2 | <i>Porphyromonadaceae bacterium</i>   | Uncharacterized protein                                                                                                                                                                           |
| 98  | 325 | 0.01 | A0A0E9G9S8 | <i>Chlamydia trachomatis</i>          | Uncharacterised protein                                                                                                                                                                           |
| 99  | 322 | 0.01 | E4T682     | <i>Paludibacter propionicipigenes</i> | UvrABC system protein C (Protein UvrC) (Excinuclease ABC subunit C)                                                                                                                               |
| 100 | 318 | 0.01 |            |                                       |                                                                                                                                                                                                   |

|     |     |      |            |                                     |                                                                                                                                                 |
|-----|-----|------|------------|-------------------------------------|-------------------------------------------------------------------------------------------------------------------------------------------------|
| 101 | 316 | 0.01 | E4T2W8     | <i>Paludibacter propionigenes</i>   | Pyruvate carboxylase (EC 6.4.1.1)                                                                                                               |
| 102 | 315 | 0.01 | A0A085EMB6 | <i>Flavobacterium gilvum</i>        | Uncharacterized protein                                                                                                                         |
| 103 | 315 | 0.01 | A0A1J5HRY1 | <i>Porphyromonadaceae bacterium</i> | Cell surface protein SprA                                                                                                                       |
| 104 | 315 | 0.01 | A0A1J5I0W6 | <i>Porphyromonadaceae bacterium</i> | DNA mismatch repair protein MutS                                                                                                                |
| 105 | 315 | 0.01 | E4T5Y6     | <i>Paludibacter propionigenes</i>   | Two component regulator three Y domain-containing protein                                                                                       |
| 106 | 314 | 0.01 | A0A1F3LXP2 | <i>Bacteroidetes bacterium</i>      | Lon protease (EC 3.4.21.53) (ATP-dependent protease La)                                                                                         |
| 107 | 314 | 0.01 | E4T3R5     | <i>Paludibacter propionigenes</i>   | Phenylalanine--tRNA ligase beta subunit (EC 6.1.1.20) (Phenylalanyl-tRNA synthetase beta subunit) (PheRS)                                       |
| 108 | 314 | 0.01 | E4T409     | <i>Paludibacter propionigenes</i>   | Mg chelatase, subunit ChII                                                                                                                      |
| 109 | 314 | 0.01 | E4T5Q6     | <i>Paludibacter propionigenes</i>   | Uncharacterized protein                                                                                                                         |
| 110 | 312 | 0.01 | A0A133PWA7 | <i>Prevotella corporis</i>          | Transposase                                                                                                                                     |
| 111 | 312 | 0.01 | A0A161LEB7 | <i>Paludibacter jiangxiensis</i>    | RHH-type transcriptional regulator                                                                                                              |
| 112 | 312 | 0.01 | E4T592     | <i>Paludibacter propionigenes</i>   | Methionine synthase (B12-dependent) (EC 2.1.1.13)                                                                                               |
| 113 | 310 | 0.01 | A0A1J5HSL1 | <i>Porphyromonadaceae bacterium</i> | Pyruvate-flavodoxin oxidoreductase (EC 1.2.7.-)                                                                                                 |
| 114 | 310 | 0.01 | K9L3A6     | <i>Porphyromonadaceae bacterium</i> | NADH-ubiquinone oxidoreductase chain 5 (EC 1.6.5.3)                                                                                             |
| 115 | 308 | 0.01 | E4T4N5     | <i>Paludibacter propionigenes</i>   | 2-succinyl-5-enolpyruvyl-6-hydroxy-3-cyclohexene-1-carboxylate synthase (SEPHCHC synthase) (EC 2.2.1.9) (Menaquinone biosynthesis protein MenD) |
| 116 | 306 | 0.01 | A0A1B1ICB8 | <i>Prevotella scopus</i>            | Uncharacterized protein                                                                                                                         |
| 117 | 300 | 0.01 | A0A1Q3M5Y6 | <i>Bacteroidales bacterium</i>      | Uncharacterized protein                                                                                                                         |
| 118 | 300 | 0.01 | E4T1S7     | <i>Paludibacter propionigenes</i>   | Carbamoyl-phosphate synthase small chain (EC 6.3.5.5) (Carbamoyl-phosphate synthetase glutamine chain)                                          |
| 119 | 300 | 0.01 |            |                                     |                                                                                                                                                 |
| 120 | 298 | 0.01 | A0A1J5HVD9 | <i>Porphyromonadaceae bacterium</i> | Citrate synthase                                                                                                                                |
| 121 | 297 | 0.01 | A0A1J5HFB3 | <i>Porphyromonadaceae bacterium</i> | L-fucose isomerase (FucIase) (EC 5.3.1.25) (6-deoxy-L-galactose isomerase)                                                                      |
| 122 | 295 | 0.01 | K9L3A9     | <i>Magnusiomyces magnusii</i>       | ATP synthase subunit a                                                                                                                          |
| 123 | 291 | 0.01 | A7AI47     | <i>Parabacteroides merdae</i>       | Uncharacterized protein                                                                                                                         |
| 124 | 290 | 0.01 | A0A1J5H7V2 | <i>Porphyromonadaceae bacterium</i> | Collagen-binding protein (Fragment)                                                                                                             |
| 125 | 290 | 0.01 | U6RCL0     | <i>Bacteroides sp.</i>              | Uncharacterized protein                                                                                                                         |

|     |     |      |            |                                       |                                                                                                         |
|-----|-----|------|------------|---------------------------------------|---------------------------------------------------------------------------------------------------------|
| 126 | 289 | 0.01 | E4T347     | <i>Paludibacter propionicipigenes</i> | Uncharacterized protein                                                                                 |
| 127 | 288 | 0.01 | E4T676     | <i>Paludibacter propionicipigenes</i> | Collagenase                                                                                             |
| 128 | 288 | 0.01 |            |                                       |                                                                                                         |
| 129 | 286 | 0.01 | E4T386     | <i>Paludibacter propionicipigenes</i> | Heterodimeric methylmalonyl-CoA mutase large subunit (EC 5.4.99.2)                                      |
| 130 | 286 | 0.01 | N8ZNX3     | <i>Acinetobacter gernerii</i>         | Uncharacterized protein                                                                                 |
| 131 | 285 | 0.01 | A0A1M3MAC5 | <i>Paludibacter sp.</i>               | Pyruvate kinase (EC 2.7.1.40)                                                                           |
| 132 | 284 | 0.01 | A0A1J5HP94 | <i>Porphyromonadaceae bacterium</i>   | UPF0313 protein AUK44_04705                                                                             |
| 133 | 284 | 0.01 | C9MTU8     | <i>Prevotella veroralis</i>           | Initiator RepB protein                                                                                  |
| 134 | 284 | 0.01 |            |                                       |                                                                                                         |
| 135 | 283 | 0.01 | A0A1Q3LZZ0 | <i>Bacteroidales bacterium</i>        | Valine--tRNA ligase (EC 6.1.1.9) (Valyl-tRNA synthetase) (ValRS)                                        |
| 136 | 283 | 0.01 | E4T683     | <i>Paludibacter propionicipigenes</i> | tRNA uridine 5-carboxymethylaminomethyl modification enzyme MnmG (Glucose-inhibited division protein A) |
| 137 | 283 | 0.01 |            |                                       |                                                                                                         |
| 138 | 277 | 0.01 | A0A1J5HUJ2 | <i>Porphyromonadaceae bacterium</i>   | Cytochrome C oxidase assembly protein                                                                   |
| 139 | 277 | 0.01 |            |                                       |                                                                                                         |
| 140 | 276 | 0.01 | A0A1T4JPM0 | <i>Sediminibacterium ginsengisoli</i> | DGQHR domain-containing protein                                                                         |
| 141 | 276 | 0.01 | E4T225     | <i>Paludibacter propionicipigenes</i> | Allosteric NADP-dependent malic enzyme (EC 1.1.1.40)                                                    |
| 142 | 274 | 0.01 | E4T4E1     | <i>Paludibacter propionicipigenes</i> | DNA-binding protein Fis                                                                                 |
| 143 | 273 | 0.01 | E4T2V1     | <i>Paludibacter propionicipigenes</i> | 4-alpha-glucanotransferase (EC 2.4.1.25)                                                                |
| 144 | 273 | 0.01 | R6D4I0     | <i>Bacteroides sp.</i>                | Uncharacterized protein                                                                                 |
| 145 | 273 | 0.01 |            |                                       |                                                                                                         |
| 146 | 272 | 0.01 | A0A1J5HLR1 | <i>Porphyromonadaceae bacterium</i>   | Carbamoyl-phosphate synthase (glutamine-hydrolyzing) (EC 6.3.5.5)                                       |
| 147 | 272 | 0.01 | E4T4E6     | <i>Paludibacter propionicipigenes</i> | Outer membrane protein assembly complex, YaeT protein                                                   |
| 148 | 270 | 0.01 | A0A0P0F9C5 | <i>Bacteroides thetaiotaomicron</i>   | 2-dehydro-3-deoxygluconokinase (EC 2.7.1.45) (Kinase, PfkB family) (PfkB domain protein) (EC 2.7.1.92)  |
| 149 | 269 | 0.01 | A0A179DEU4 | <i>Pedobacter sp.</i>                 | DNA methyltransferase                                                                                   |
| 150 | 269 | 0.01 | A0A1J5HHU5 | <i>Porphyromonadaceae bacterium</i>   | Rod shape-determining protein RodA                                                                      |
| 151 | 269 | 0.01 | E4T4K6     | <i>Paludibacter propionicipigenes</i> | Peptidoglycan glycosyltransferase (EC 2.4.1.129)                                                        |

|     |     |      |            |                                     |                                                                                                                                                                                                                                                                                                          |
|-----|-----|------|------------|-------------------------------------|----------------------------------------------------------------------------------------------------------------------------------------------------------------------------------------------------------------------------------------------------------------------------------------------------------|
| 152 | 268 | 0.01 | E4T3B7     | <i>Paludibacter propionigenes</i>   | DNA ligase (EC 6.5.1.2) (Polydeoxyribonucleotide synthase [NAD(+)])                                                                                                                                                                                                                                      |
| 153 | 268 | 0.01 | Q45FH5     | <i>Adineta vaga</i>                 | Transposase                                                                                                                                                                                                                                                                                              |
| 154 | 267 | 0.01 | A0A1Q3KSP0 | <i>Bacteroidales bacterium</i>      | Uncharacterized protein (Fragment)                                                                                                                                                                                                                                                                       |
| 155 | 267 | 0.01 | A0A1Q3QBX8 | <i>Bacteroidia bacterium</i>        | Uncharacterized protein                                                                                                                                                                                                                                                                                  |
| 156 | 267 | 0.01 | I8Y0K1     | <i>Bacteroides salyersiae</i>       | SusC/RagA family TonB-linked outer membrane protein                                                                                                                                                                                                                                                      |
| 157 | 266 | 0.01 | A0A1F3ME11 | <i>Bacteroidetes bacterium</i>      | Cadmium-translocating P-type ATPase                                                                                                                                                                                                                                                                      |
| 158 | 265 | 0.01 | A0A1E4EKR5 | <i>Paludibacter sp.</i>             | L-fucose:H <sup>+</sup> symporter permease                                                                                                                                                                                                                                                               |
| 159 | 265 | 0.01 | A0A1J5HNC6 | <i>Porphyromonadaceae bacterium</i> | Cation/H(+) antiporter                                                                                                                                                                                                                                                                                   |
| 160 | 265 | 0.01 | A0A1M3M9F4 | <i>Paludibacter sp.</i>             | Uncharacterized protein                                                                                                                                                                                                                                                                                  |
| 161 | 265 | 0.01 | E4T1V0     | <i>Paludibacter propionigenes</i>   | Alanine racemase (EC 5.1.1.1)                                                                                                                                                                                                                                                                            |
| 162 | 264 | 0.01 | A0A170Y7T4 | <i>Paludibacter jiangxiensis</i>    | Formate-dependent phosphoribosylglycinamide formyltransferase (5'-phosphoribosylglycinamide transformylase 2) (Formate-dependent GAR transformylase) (EC 2.1.2.-) (GAR transformylase 2) (GART 2) (Non-folate glycinamide ribonucleotide transformylase) (Phosphoribosylglycinamide formyltransferase 2) |
| 163 | 263 | 0.01 | A0A1J5HSK7 | <i>Porphyromonadaceae bacterium</i> | Peptidase S41                                                                                                                                                                                                                                                                                            |
| 164 | 263 | 0.01 | E4T6Q8     | <i>Paludibacter propionigenes</i>   | Major facilitator superfamily MFS_1                                                                                                                                                                                                                                                                      |
| 165 | 263 | 0.01 | E4T6Z1     | <i>Paludibacter propionigenes</i>   | Exonuclease RecJ (EC 3.1.-.-)                                                                                                                                                                                                                                                                            |
| 166 | 262 | 0.01 | E4T5B8     | <i>Paludibacter propionigenes</i>   | Translation elongation factor 2 (EF-2/EF-G)                                                                                                                                                                                                                                                              |
| 167 | 260 | 0.01 | C7X5L7     | <i>Parabacteroides sp.</i>          | Glycosyl hydrolase, family 31 (EC 3.2.1.-)                                                                                                                                                                                                                                                               |
| 168 | 258 | 0.01 | A0A1M3M7V7 | <i>Paludibacter sp.</i>             | Carbamoyl-phosphate synthase (glutamine-hydrolyzing) (EC 6.3.5.5)                                                                                                                                                                                                                                        |
| 169 | 258 | 0.01 | E4T6D1     | <i>Paludibacter propionigenes</i>   | Galactokinase (EC 2.7.1.6) (Galactose kinase)                                                                                                                                                                                                                                                            |
| 170 | 253 | 0.01 | A0A1J5HP18 | <i>Porphyromonadaceae bacterium</i> | Cytochrome ubiquinol oxidase subunit I                                                                                                                                                                                                                                                                   |
| 171 | 253 | 0.01 | E4T529     | <i>Paludibacter propionigenes</i>   | DNA gyrase subunit B (EC 5.99.1.3)                                                                                                                                                                                                                                                                       |
| 172 | 253 | 0.01 | E4T5N7     | <i>Paludibacter propionigenes</i>   | Primosomal protein N' (EC 3.6.4.-) (ATP-dependent helicase PriA)                                                                                                                                                                                                                                         |
| 173 | 253 | 0.01 | E4T8H6     | <i>Paludibacter propionigenes</i>   | Anthranilate synthase, component I (EC 4.1.3.27)                                                                                                                                                                                                                                                         |
| 174 | 253 | 0.01 | K9L3Q8     | <i>Magnusiomyces magnusii</i>       | NADH-ubiquinone oxidoreductase chain 4 (EC 1.6.5.3)                                                                                                                                                                                                                                                      |
| 175 | 253 | 0.01 |            |                                     |                                                                                                                                                                                                                                                                                                          |
| 176 | 253 | 0.01 |            |                                     |                                                                                                                                                                                                                                                                                                          |

|     |     |      |            |                                       |                                                                                                                                                                                                                                                            |
|-----|-----|------|------------|---------------------------------------|------------------------------------------------------------------------------------------------------------------------------------------------------------------------------------------------------------------------------------------------------------|
| 177 | 252 | 0.01 | E4T587     | <i>Paludibacter propionicipigenes</i> | DNA mismatch repair protein MutS                                                                                                                                                                                                                           |
| 178 | 251 | 0.01 | E4T2L0     | <i>Paludibacter propionicipigenes</i> | Glutamine--fructose-6-phosphate aminotransferase [isomerizing] (EC 2.6.1.16) (D-fructose-6-phosphate amidotransferase) (GFAT) (Glucosamine-6-phosphate synthase) (Hexosephosphate aminotransferase) (L-glutamine--D-fructose-6-phosphate amidotransferase) |
| 179 | 249 | 0.01 | E4T3Y7     | <i>Paludibacter propionicipigenes</i> | 4-alpha-glucanotransferase (EC 2.4.1.25)                                                                                                                                                                                                                   |
| 180 | 248 | 0.01 | A0A1M3DPZ9 | <i>Bacteroidales bacterium</i>        | DUF4954 domain-containing protein                                                                                                                                                                                                                          |
| 181 | 248 | 0.01 | A0A1M3FLT2 | <i>Bacteroidia bacterium</i>          | Uncharacterized protein                                                                                                                                                                                                                                    |
| 182 | 248 | 0.01 | E4T1U5     | <i>Paludibacter propionicipigenes</i> | Propionyl-CoA carboxylase carboxyltransferase subunit (EC 6.4.1.3)                                                                                                                                                                                         |
| 183 | 248 | 0.01 | E4T526     | <i>Paludibacter propionicipigenes</i> | Heat shock protein Hsp90                                                                                                                                                                                                                                   |
| 184 | 248 | 0.01 |            |                                       |                                                                                                                                                                                                                                                            |
| 185 | 247 | 0.01 | A0A1F3LNZ9 | <i>Bacteroidetes bacterium</i>        | Glucarate dehydratase                                                                                                                                                                                                                                      |
| 186 | 247 | 0.01 | E4T522     | <i>Paludibacter propionicipigenes</i> | Isoleucine--tRNA ligase (EC 6.1.1.5) (Isoleucyl-tRNA synthetase) (IleRS)                                                                                                                                                                                   |
| 187 | 246 | 0.01 | E4T139     | <i>Paludibacter propionicipigenes</i> | Ribonuclease, Rne/Rng family                                                                                                                                                                                                                               |
| 188 | 245 | 0.01 | A0A1J5HQ06 | <i>Porphyromonadaceae bacterium</i>   | Protein translocase subunit SecA                                                                                                                                                                                                                           |
| 189 | 245 | 0.01 | A0A1J5HWA7 | <i>Porphyromonadaceae bacterium</i>   | ATP-dependent DNA helicase RecG (EC 3.6.4.12)                                                                                                                                                                                                              |
| 190 | 245 | 0.01 | E4T0F4     | <i>Paludibacter propionicipigenes</i> | Alpha-glucan phosphorylase (EC 2.4.1.1)                                                                                                                                                                                                                    |
| 191 | 245 | 0.01 |            |                                       |                                                                                                                                                                                                                                                            |
| 192 | 244 | 0.01 | E4T4K3     | <i>Paludibacter propionicipigenes</i> | UDP-N-acetylmuramoylalanine--D-glutamate ligase (EC 6.3.2.9) (D-glutamic acid-adding enzyme) (UDP-N-acetylmuramoyl-L-alanyl-D-glutamate synthetase)                                                                                                        |
| 193 | 244 | 0.01 | K5ZYH0     | <i>Parabacteroides johnsonii</i>      | Uncharacterized protein                                                                                                                                                                                                                                    |
| 194 | 244 | 0.01 |            |                                       |                                                                                                                                                                                                                                                            |
| 195 | 241 | 0.01 | A0A1E4EHY6 | <i>Paludibacter sp.</i>               | DNA polymerase I (EC 2.7.7.7)                                                                                                                                                                                                                              |
| 196 | 241 | 0.01 | A0A1M3M9P3 | <i>Paludibacter sp.</i>               | Outer membrane protein assembly factor BamA                                                                                                                                                                                                                |
| 197 | 241 | 0.01 | E4T2N4     | <i>Paludibacter propionicipigenes</i> | Xanthosine permease                                                                                                                                                                                                                                        |
| 198 | 241 | 0.01 | E4T4D3     | <i>Paludibacter propionicipigenes</i> | Nitrogenase (EC 1.18.6.1)                                                                                                                                                                                                                                  |
| 199 | 240 | 0.01 | E4T2Q7     | <i>Paludibacter propionicipigenes</i> | Pullulanase, type I                                                                                                                                                                                                                                        |
| 200 | 240 | 0.01 | E4T5N0     | <i>Paludibacter propionicipigenes</i> | (P)ppGpp synthetase I, SpoT/RelA (EC 2.7.6.5)                                                                                                                                                                                                              |
| 201 | 240 | 0.01 | E4T5Y8     | <i>Paludibacter propionicipigenes</i> | Xanthine/uracil/vitamin C permease                                                                                                                                                                                                                         |



|     |     |      |            |                                     |                                                                                                                                                                     |
|-----|-----|------|------------|-------------------------------------|---------------------------------------------------------------------------------------------------------------------------------------------------------------------|
| 202 | 239 | 0.01 | A0A023UMS1 | <i>Magnusiomyces ingens</i>         | NADH-ubiquinone oxidoreductase chain 1 (EC 1.6.5.3)                                                                                                                 |
| 203 | 239 | 0.01 | A0A1F3H411 | <i>Bacteroidetes bacterium</i>      | Uncharacterized protein                                                                                                                                             |
| 204 | 239 | 0.01 | A0A1J5HAI3 | <i>Porphyromonadaceae bacterium</i> | Uncharacterized protein                                                                                                                                             |
| 205 | 239 | 0.01 | A0A1J5HW56 | <i>Porphyromonadaceae bacterium</i> | Succinate--CoA ligase [ADP-forming] subunit beta (EC 6.2.1.5) (Succinyl-CoA synthetase subunit beta) (SCS-beta)                                                     |
| 206 | 239 | 0.01 | E4T8K8     | <i>Paludibacter propionigenes</i>   | Uncharacterized protein                                                                                                                                             |
| 207 | 238 | 0.01 | A0A1J5H9M4 | <i>Porphyromonadaceae bacterium</i> | Cysteine--tRNA ligase (EC 6.1.1.16) (Cysteinyl-tRNA synthetase) (CysRS)                                                                                             |
| 208 | 238 | 0.01 | A0A1J5HJU7 | <i>Porphyromonadaceae bacterium</i> | Anaerobic sulfatase maturase                                                                                                                                        |
| 209 | 238 | 0.01 | A0A1Q3QJR2 | <i>Bacteroidia bacterium</i>        | Cell surface protein SprA                                                                                                                                           |
| 210 | 237 | 0.01 | A0A1J5HMM6 | <i>Porphyromonadaceae bacterium</i> | Glutaconyl-CoA decarboxylase subunit beta                                                                                                                           |
| 211 | 237 | 0.01 | E4T8H5     | <i>Paludibacter propionigenes</i>   | Tryptophan synthase beta chain (EC 4.2.1.20)                                                                                                                        |
| 212 | 236 | 0.01 | E4T069     | <i>Paludibacter propionigenes</i>   | Glycine dehydrogenase (decarboxylating) (EC 1.4.4.2) (Glycine cleavage system P-protein) (Glycine decarboxylase) (Glycine dehydrogenase (aminomethyl-transferring)) |
| 213 | 236 | 0.01 | E4T141     | <i>Paludibacter propionigenes</i>   | SSU ribosomal protein S1P                                                                                                                                           |
| 214 | 235 | 0.01 | G4KVF2     | <i>Oscillibacter valericigenes</i>  | Uncharacterized protein                                                                                                                                             |
| 215 | 234 | 0.01 | A0A0P0GD61 | <i>Bacteroides cellulosilyticus</i> | Periplasmic beta-glucosidase (EC 3.2.1.21)                                                                                                                          |
| 216 | 234 | 0.01 | E4T4J0     | <i>Paludibacter propionigenes</i>   | Alpha-N-acetylglucosaminidase (EC 3.2.1.50)                                                                                                                         |
| 217 | 234 | 0.01 | E4T5C0     | <i>Paludibacter propionigenes</i>   | Glycine--tRNA ligase (EC 6.1.1.14) (Glycyl-tRNA synthetase) (GlyRS)                                                                                                 |
| 218 | 234 | 0.01 | E4T6K7     | <i>Paludibacter propionigenes</i>   | Sodium/hydrogen exchanger                                                                                                                                           |
| 219 | 234 | 0.01 |            |                                     |                                                                                                                                                                     |
| 220 | 233 | 0.01 | A0A0Q7S7D9 | <i>Pelomonas sp.</i>                | Uncharacterized protein                                                                                                                                             |
| 221 | 233 | 0.01 | A0A1E4EKS6 | <i>Paludibacter sp.</i>             | SusC/RagA family protein                                                                                                                                            |
| 222 | 233 | 0.01 | A0A1J5HKW0 | <i>Porphyromonadaceae bacterium</i> | Phosphate transporter                                                                                                                                               |
| 223 | 233 | 0.01 | E4T353     | <i>Paludibacter propionigenes</i>   | Uncharacterized protein                                                                                                                                             |
| 224 | 233 | 0.01 | E4T3C6     | <i>Paludibacter propionigenes</i>   | Major facilitator superfamily MFS_1                                                                                                                                 |
| 225 | 233 | 0.01 | E4T3W0     | <i>Paludibacter propionigenes</i>   | Alpha-2-macroglobulin domain protein                                                                                                                                |
| 226 | 232 | 0.01 | A0A171AE46 | <i>Paludibacter jiangxiensis</i>    | Signal transduction histidine kinase                                                                                                                                |
| 227 | 232 | 0.01 | E4TOP6     | <i>Paludibacter propionigenes</i>   | Succinate dehydrogenase subunit A (EC 1.3.5.1) (EC 1.3.99.1)                                                                                                        |

|     |     |      |            |                                       |                                                                                                             |
|-----|-----|------|------------|---------------------------------------|-------------------------------------------------------------------------------------------------------------|
| 228 | 232 | 0.01 | E4T115     | <i>Paludibacter propionicipigenes</i> | Aspartokinase (EC 2.7.2.4)                                                                                  |
| 229 | 231 | 0.01 | A0A1J5HH65 | <i>Porphyromonadaceae bacterium</i>   | Uncharacterized protein                                                                                     |
| 230 | 231 | 0.01 | E4T4D2     | <i>Paludibacter propionicipigenes</i> | Nitrogenase MoFe cofactor biosynthesis protein NifE                                                         |
| 231 | 230 | 0.01 | A0A1Q3QC75 | <i>Bacteroidia bacterium</i>          | Uncharacterized protein                                                                                     |
| 232 | 230 | 0.01 | E4T2K9     | <i>Paludibacter propionicipigenes</i> | Amidophosphoribosyltransferase (EC 2.4.2.14)                                                                |
| 233 | 230 | 0.01 | E4T8I3     | <i>Paludibacter propionicipigenes</i> | Transcription termination/antitermination protein NusA                                                      |
| 234 | 229 | 0.01 | E4T417     | <i>Paludibacter propionicipigenes</i> | Leucine--tRNA ligase (EC 6.1.1.4) (Leucyl-tRNA synthetase) (LeuRS)                                          |
| 235 | 228 | 0.01 | A0A1Q3QH52 | <i>Bacteroidia bacterium</i>          | Uncharacterized protein                                                                                     |
| 236 | 227 | 0.01 | A0A1M3DMW5 | <i>Bacteroidales bacterium</i>        | Long-chain fatty acid--CoA ligase                                                                           |
| 237 | 227 | 0.01 | A0A1M3DPI5 | <i>Bacteroidales bacterium</i>        | Uncharacterized protein                                                                                     |
| 238 | 226 | 0.01 | A0A1G4G387 | <i>Petrimonas mucosa</i>              | Uncharacterized protein                                                                                     |
| 239 | 226 | 0.01 | A0A1M3DNS9 | <i>Bacteroidales bacterium</i>        | Cell surface protein SprA                                                                                   |
| 240 | 226 | 0.01 | E4T0E5     | <i>Paludibacter propionicipigenes</i> | DNA polymerase III subunit gamma/tau (EC 2.7.7.7)                                                           |
| 241 | 225 | 0.01 | A0A0K0WVI4 | <i>Litoditis aff. marina PmIII</i>    | NADH dehydrogenase subunit 5                                                                                |
| 242 | 225 | 0.01 | A0A1E4ELV7 | <i>Paludibacter sp.</i>               | Dehydrogenase                                                                                               |
| 243 | 224 | 0.01 | A0A1J5HQC1 | <i>Porphyromonadaceae bacterium</i>   | Fe-S cluster assembly protein SufB                                                                          |
| 244 | 224 | 0.01 | A0A1J5HR75 | <i>Porphyromonadaceae bacterium</i>   | Phytoene desaturase                                                                                         |
| 245 | 224 | 0.01 | A0A1J5HS20 | <i>Porphyromonadaceae bacterium</i>   | Flagellar motor protein MotA                                                                                |
| 246 | 224 | 0.01 | A0A1M5CJ15 | <i>Bacteroides luti</i>               | Glycosyltransferase, catalytic subunit of cellulose synthase and poly-beta-1,6-N-acetylglucosamine synthase |
| 247 | 224 | 0.01 |            |                                       |                                                                                                             |
| 248 | 223 | 0.01 | D0TGP7     | <i>Bacteroides sp.</i>                | Helicase C-terminal domain protein                                                                          |
| 249 | 223 | 0.01 | E4T2R2     | <i>Paludibacter propionicipigenes</i> | Phosphoglucomutase/phosphomannomutase alpha/beta/alpha domain I                                             |
| 250 | 222 | 0.01 | A0A1J5HBP7 | <i>Porphyromonadaceae bacterium</i>   | Uncharacterized protein                                                                                     |
| 251 | 222 | 0.01 | A0A1J5HII7 | <i>Porphyromonadaceae bacterium</i>   | Methionine synthase                                                                                         |
| 252 | 221 | 0.01 | A0A0P6BFP2 | <i>Daphnia magna</i>                  | Uncharacterized protein                                                                                     |
| 253 | 221 | 0.01 | A0A1J5HRQ6 | <i>Porphyromonadaceae bacterium</i>   | Uncharacterized protein                                                                                     |

|     |     |      |            |                                      |                                                                                                                                                                                                                                                                                                                                                                                                                    |
|-----|-----|------|------------|--------------------------------------|--------------------------------------------------------------------------------------------------------------------------------------------------------------------------------------------------------------------------------------------------------------------------------------------------------------------------------------------------------------------------------------------------------------------|
| 254 | 221 | 0.01 | E9I741     | <i>Daphnia pulex</i>                 | Putative uncharacterized protein (Fragment)                                                                                                                                                                                                                                                                                                                                                                        |
| 255 | 220 | 0.01 | A0A161LF68 | <i>Paludibacter jiangxiensis</i>     | Two-component system, NtrC family                                                                                                                                                                                                                                                                                                                                                                                  |
| 256 | 220 | 0.01 | E4T650     | <i>Paludibacter propionigenes</i>    | Cell shape determining protein, MreB/Mrl family                                                                                                                                                                                                                                                                                                                                                                    |
| 257 | 220 | 0.01 | E4T793     | <i>Paludibacter propionigenes</i>    | Elongation factor G (EF-G)                                                                                                                                                                                                                                                                                                                                                                                         |
| 258 | 219 | 0.01 | A0A1J5HIC5 | <i>Porphyromonadaceae bacterium</i>  | ABC transporter permease                                                                                                                                                                                                                                                                                                                                                                                           |
| 259 | 219 | 0.01 | A0A1J5I218 | <i>Porphyromonadaceae bacterium</i>  | Uncharacterized protein                                                                                                                                                                                                                                                                                                                                                                                            |
| 260 | 219 | 0.01 | E4T825     | <i>Paludibacter propionigenes</i>    | Chaperone protein DnaK (HSP70) (Heat shock 70 kDa protein) (Heat shock protein 70)                                                                                                                                                                                                                                                                                                                                 |
| 261 | 219 | 0.01 | E4T8K7     | <i>Paludibacter propionigenes</i>    | L-aspartate oxidase (EC 1.4.3.16)                                                                                                                                                                                                                                                                                                                                                                                  |
| 262 | 219 | 0.01 | W2UCH0     | <i>Gammaproteobacteria bacterium</i> | Uncharacterized protein                                                                                                                                                                                                                                                                                                                                                                                            |
| 263 | 218 | 0.01 | A0A023UPK8 | <i>Magnusiomyces ingens</i>          | Cytochrome c oxidase subunit 2                                                                                                                                                                                                                                                                                                                                                                                     |
| 264 | 218 | 0.01 | A0A1M3MA44 | <i>Paludibacter sp.</i>              | Uncharacterized protein                                                                                                                                                                                                                                                                                                                                                                                            |
| 265 | 218 | 0.01 | D8L7S1     | <i>Paramecium caudatum</i>           | NADH-ubiquinone oxidoreductase chain 5 (EC 1.6.5.3)                                                                                                                                                                                                                                                                                                                                                                |
| 266 | 218 | 0.01 | E4T544     | <i>Paludibacter propionigenes</i>    | Response regulator receiver protein                                                                                                                                                                                                                                                                                                                                                                                |
| 267 | 218 | 0.01 | G4KNZ0     | <i>Oscillibacter valericigenes</i>   | Pyruvate carboxylase (EC 6.4.1.1)                                                                                                                                                                                                                                                                                                                                                                                  |
| 268 | 217 | 0.01 | E4T4C8     | <i>Paludibacter propionigenes</i>    | Nitrogenase protein alpha chain (EC 1.18.6.1)                                                                                                                                                                                                                                                                                                                                                                      |
| 269 | 217 | 0.01 | E4T7D6     | <i>Paludibacter propionigenes</i>    | AMP-dependent synthetase and ligase                                                                                                                                                                                                                                                                                                                                                                                |
| 270 | 216 | 0.01 | A0A1E4EAJ0 | <i>Paludibacter sp.</i>              | Signal recognition particle protein (Fifty-four homolog)                                                                                                                                                                                                                                                                                                                                                           |
| 271 | 216 | 0.01 | A0A1J5HKA8 | <i>Porphyromonadaceae bacterium</i>  | 4Fe-4S ferredoxin                                                                                                                                                                                                                                                                                                                                                                                                  |
| 272 | 216 | 0.01 | A0A1J5HPN8 | <i>Porphyromonadaceae bacterium</i>  | Chloride channel protein                                                                                                                                                                                                                                                                                                                                                                                           |
| 273 | 216 | 0.01 | E4T0A9     | <i>Paludibacter propionigenes</i>    | Chromosomal replication initiator protein DnaA                                                                                                                                                                                                                                                                                                                                                                     |
| 274 | 215 | 0.01 | E4T604     | <i>Paludibacter propionigenes</i>    | AMP-dependent synthetase and ligase                                                                                                                                                                                                                                                                                                                                                                                |
| 275 | 215 | 0.01 | E4T8A8     | <i>Paludibacter propionigenes</i>    | Carboxynorspermidine decarboxylase (EC 4.1.1.-)                                                                                                                                                                                                                                                                                                                                                                    |
| 276 | 215 | 0.01 | A6LE80     | <i>Parabacteroides distasonis</i>    | DNA-directed RNA polymerase subunit beta' (RNAP subunit beta') (EC 2.7.7.6) (RNA polymerase subunit beta') (Transcriptase subunit beta')                                                                                                                                                                                                                                                                           |
| 277 | 214 | 0.01 | A0A1J5H964 | <i>Porphyromonadaceae bacterium</i>  | Multifunctional fusion protein [Includes: UDP-3-O-acyl-N-acetylglucosamine deacetylase (UDP-3-O-acyl-GlcNAc deacetylase) (EC 3.5.1.108) (UDP-3-O-[R-3-hydroxymyristoyl]-N-acetylglucosamine deacetylase); 3-hydroxyacyl-[acyl-carrier-protein] dehydratase FabZ (EC 4.2.1.59) ((3R)-hydroxymyristoyl-[acyl-carrier-protein] dehydratase) (Beta-hydroxyacyl-ACP dehydratase) ((3R)-hydroxymyristoyl-ACP dehydrase)] |

|     |     |      |            |                                     |                                                                                         |
|-----|-----|------|------------|-------------------------------------|-----------------------------------------------------------------------------------------|
| 278 | 214 | 0.01 | A0A1J5HM03 | <i>Porphyromonadaceae bacterium</i> | TonB-dependent receptor                                                                 |
| 279 | 213 | 0.01 | E4T3G0     | <i>Paludibacter propionigenes</i>   | Glutamate synthase (NADH) small subunit (EC 1.4.1.14)                                   |
| 280 | 213 | 0.01 |            |                                     |                                                                                         |
| 281 | 212 | 0.01 | A0A1E4EGA4 | <i>Paludibacter sp.</i>             | Elongation factor 4 (EF-4) (EC 3.6.5.n1) (Ribosomal back-translocase LepA)              |
| 282 | 212 | 0.01 | A0A1E4EKQ5 | <i>Paludibacter sp.</i>             | DUF4914 domain-containing protein                                                       |
| 283 | 212 | 0.01 | A0A1J5HYA6 | <i>Porphyromonadaceae bacterium</i> | Amidophosphoribosyltransferase                                                          |
| 284 | 212 | 0.01 | E4T144     | <i>Paludibacter propionigenes</i>   | Drug resistance transporter, EmrB/QacA subfamily                                        |
| 285 | 212 | 0.01 | E4T8G7     | <i>Paludibacter propionigenes</i>   | Phosphate transporter                                                                   |
| 286 | 211 | 0.01 | E4T5H4     | <i>Paludibacter propionigenes</i>   | Uncharacterized protein                                                                 |
| 287 | 210 | 0.01 | A0A0R3QEE4 | <i>Brugia timori</i>                | Uncharacterized protein                                                                 |
| 288 | 210 | 0.01 | A0A1Q3KXL3 | <i>Bacteroidales bacterium</i>      | Glucosamine-6-phosphate deaminase (EC 3.5.99.6)                                         |
| 289 | 210 | 0.01 |            |                                     |                                                                                         |
| 290 | 209 | 0.01 | A0A0S8JYW7 | <i>Bacteroides sp.</i>              | Oxalate:formate antiporter                                                              |
| 291 | 209 | 0.01 | A0A1F3LP63 | <i>Bacteroidetes bacterium</i>      | Phosphoenolpyruvate carboxykinase (ATP) (PCK) (PEP carboxykinase) (PEPCK) (EC 4.1.1.49) |
| 292 | 209 | 0.01 | A0A1J5HEC6 | <i>Porphyromonadaceae bacterium</i> | DNA topoisomerase IV                                                                    |
| 293 | 209 | 0.01 | A0A1J5HF64 | <i>Porphyromonadaceae bacterium</i> | L-rhamnose isomerase (EC 5.3.1.14)                                                      |
| 294 | 209 | 0.01 | A0A1M3MDN4 | <i>Paludibacter sp.</i>             | Tryptophanase                                                                           |
| 295 | 209 | 0.01 | E4T1T8     | <i>Paludibacter propionigenes</i>   | Uncharacterized protein                                                                 |
| 296 | 209 | 0.01 | E4T5S3     | <i>Paludibacter propionigenes</i>   | 2-oxoglutarate synthase (EC 1.2.7.3)                                                    |
| 297 | 209 | 0.01 | WOER83     | <i>Barnesiella viscericola</i>      | Alpha-xylosidase                                                                        |
| 298 | 208 | 0.01 | A0A1J5HY73 | <i>Porphyromonadaceae bacterium</i> | DNA-directed DNA polymerase (EC 2.7.7.7)                                                |
| 299 | 208 | 0.01 | E4T0I0     | <i>Paludibacter propionigenes</i>   | Dipeptidyl-peptidase IV (EC 3.4.14.5)                                                   |
| 300 | 208 | 0.01 | E4T3A0     | <i>Paludibacter propionigenes</i>   | RNA polymerase, sigma 70 subunit, RpoD subfamily                                        |
| 301 | 207 | 0.01 | A0A0Q7RZB1 | <i>Pelomonas sp.</i>                | Uncharacterized protein                                                                 |
| 302 | 207 | 0.01 | E4T2M4     | <i>Paludibacter propionigenes</i>   | Transcription-repair-coupling factor (TRCF) (EC 3.6.4.-)                                |
| 303 | 207 | 0.01 | E4T3Y3     | <i>Paludibacter propionigenes</i>   | Seryl-tRNA synthetase (EC 6.1.1.11)                                                     |
| 304 | 207 | 0.01 | E4T4E2     | <i>Paludibacter propionigenes</i>   | Nucleoside recognition domain protein                                                   |

|     |     |      |            |                                         |                                                                                                                                                                      |
|-----|-----|------|------------|-----------------------------------------|----------------------------------------------------------------------------------------------------------------------------------------------------------------------|
| 305 | 207 | 0.01 | E4T4G7     | <i>Paludibacter propionicipigenes</i>   | Ferrous iron transport protein B                                                                                                                                     |
| 306 | 207 | 0.01 | E4T7Y7     | <i>Paludibacter propionicipigenes</i>   | Major facilitator superfamily MFS_1                                                                                                                                  |
| 307 | 207 | 0.01 | E4T872     | <i>Paludibacter propionicipigenes</i>   | Serine palmitoyltransferase (EC 2.3.1.29) (EC 2.3.1.50)                                                                                                              |
| 308 | 207 | 0.01 | E4T8M9     | <i>Paludibacter propionicipigenes</i>   | Alpha amylase catalytic region                                                                                                                                       |
| 309 | 204 | 0.01 | A0A1J5H7Y6 | <i>Porphyromonadaceae bacterium</i>     | CTP synthase (EC 6.3.4.2) (Cytidine 5'-triphosphate synthase) (Cytidine triphosphate synthetase) (CTP synthetase) (CTPS) (UTP--ammonia ligase)                       |
| 310 | 204 | 0.01 | A0A1J5HDM2 | <i>Porphyromonadaceae bacterium</i>     | Transglycosylase (Fragment)                                                                                                                                          |
| 311 | 204 | 0.01 | A0A1J5HFV4 | <i>Porphyromonadaceae bacterium</i>     | tRNA-2-methylthio-N(6)-dimethylallyl-adenosine synthase (EC 2.8.4.3) ((Dimethylallyl)adenosine tRNA methylthiotransferase MiaB) (tRNA-i(6)A37 methylthiotransferase) |
| 312 | 204 | 0.01 | A0A1J5HX74 | <i>Porphyromonadaceae bacterium</i>     | CoA-disulfide reductase                                                                                                                                              |
| 313 | 204 | 0.01 | I9FDN5     | <i>Bacteroides cellulosilyticus</i>     | Uncharacterized protein                                                                                                                                              |
| 314 | 204 | 0.01 |            |                                         |                                                                                                                                                                      |
| 315 | 203 | 0.01 | A0A1J5HLC9 | <i>Porphyromonadaceae bacterium</i>     | Uncharacterized protein                                                                                                                                              |
| 316 | 203 | 0.01 | D8L7R1     | <i>Paramecium caudatum</i>              | NADH-ubiquinone oxidoreductase chain 4 (EC 1.6.5.3)                                                                                                                  |
| 317 | 203 | 0.01 | E4T0G8     | <i>Paludibacter propionicipigenes</i>   | Aspartate kinase homoserine dehydrogenase (EC 1.1.1.3) (EC 2.7.2.4)                                                                                                  |
| 318 | 203 | 0.01 | E4T0X5     | <i>Paludibacter propionicipigenes</i>   | Peptidase U32                                                                                                                                                        |
| 319 | 203 | 0.01 | E4T7C2     | <i>Paludibacter propionicipigenes</i>   | DNA-directed RNA polymerase subunit alpha (RNAP subunit alpha) (EC 2.7.7.6) (RNA polymerase subunit alpha) (Transcriptase subunit alpha)                             |
| 320 | 203 | 0.01 |            |                                         |                                                                                                                                                                      |
| 321 | 202 | 0.01 | A0A0K3A869 | <i>Xanthomonas translucens pv. poae</i> | Riboflavin biosynthesis protein (EC 2.7.7.2)                                                                                                                         |
| 322 | 202 | 0.01 | E4T727     | <i>Paludibacter propionicipigenes</i>   | ATP-dependent DNA helicase RecG (EC 3.6.4.12)                                                                                                                        |
| 323 | 202 | 0.01 |            |                                         |                                                                                                                                                                      |
| 324 | 201 | 0.01 | A0A1J5SFW2 | <i>mine drainage metagenome</i>         | Cyclic pyranopterin monophosphate synthase (EC 4.1.99.22)                                                                                                            |
| 325 | 201 | 0.01 | A0A1Q3MTC6 | <i>Bacteroidetes bacterium</i>          | DNA helicase (EC 3.6.4.12)                                                                                                                                           |
| 326 | 201 | 0.01 | E4T299     | <i>Paludibacter propionicipigenes</i>   | Malonyl CoA-acyl carrier protein transacylase (EC 2.3.1.39)                                                                                                          |
| 327 | 201 | 0.01 | E4T5K0     | <i>Paludibacter propionicipigenes</i>   | Peptidase C1A papain                                                                                                                                                 |
| 328 | 201 | 0.01 | E4T5M4     | <i>Paludibacter propionicipigenes</i>   | Fumarate hydratase class I (EC 4.2.1.2)                                                                                                                              |
| 329 | 201 | 0.01 | K5ZY38     | <i>Parabacteroides johnsonii</i>        | Uncharacterized protein                                                                                                                                              |

|     |     |      |            |                                       |                                                                                                                                                                     |
|-----|-----|------|------------|---------------------------------------|---------------------------------------------------------------------------------------------------------------------------------------------------------------------|
| 330 | 200 | 0.01 | A0A0S7C3I4 | <i>Lentimicrobium saccharophilum</i>  | Uncharacterized protein                                                                                                                                             |
| 331 | 200 | 0.01 | K9L4A0     | <i>Magnusiomyces magnusii</i>         | Cytochrome c oxidase subunit 1 (EC 1.9.3.1)                                                                                                                         |
| 332 | 199 | 0.01 | A0A1J5HHU1 | <i>Porphyromonadaceae bacterium</i>   | Magnesium transport protein CorA                                                                                                                                    |
| 333 | 199 | 0.01 | E4T576     | <i>Paludibacter propionicipigenes</i> | Integral membrane sensor signal transduction histidine kinase                                                                                                       |
| 334 | 199 | 0.01 | E4T6H1     | <i>Paludibacter propionicipigenes</i> | AAA ATPase                                                                                                                                                          |
| 335 | 199 | 0.01 | G4KT17     | <i>Oscillibacter valericipigenes</i>  | Putative helicase                                                                                                                                                   |
| 336 | 199 | 0.01 | K6AJ45     | <i>Parabacteroides distasonis</i>     | SusC/RagA family TonB-linked outer membrane protein                                                                                                                 |
| 337 | 198 | 0.01 | A0A0P0GH26 | <i>Bacteroides cellulosilyticus</i>   | Isomalto-dextranase (EC 3.2.1.94)                                                                                                                                   |
| 338 | 198 | 0.01 | A0A1J5HKK3 | <i>Porphyromonadaceae bacterium</i>   | Methylmalonyl-CoA mutase small subunit                                                                                                                              |
| 339 | 198 | 0.01 | A0A1J5HNN1 | <i>Porphyromonadaceae bacterium</i>   | Transketolase                                                                                                                                                       |
| 340 | 198 | 0.01 | A0A1M3MEQ1 | <i>Paludibacter sp.</i>               | Phosphoribosylformylglycinamide synthase (FGAM synthase) (FGAMS) (EC 6.3.5.3) (Formylglycinamide ribonucleotide amidotransferase) (FGAR amidotransferase) (FGAR-AT) |
| 341 | 198 | 0.01 | A6LIH5     | <i>Parabacteroides distasonis</i>     | Phosphoenolpyruvate synthase/pyruvate phosphate dikinase                                                                                                            |
| 342 | 198 | 0.01 | B0MX71     | <i>Alistipes putredinis</i>           | Integrase core domain protein                                                                                                                                       |
| 343 | 198 | 0.01 | E4T3P8     | <i>Paludibacter propionicipigenes</i> | 60 kDa chaperonin (GroEL protein) (Protein Cpn60)                                                                                                                   |
| 344 | 198 | 0.01 |            |                                       |                                                                                                                                                                     |
| 345 | 197 | 0.01 | A0A150XAA9 | <i>Roseivirga spongicola</i>          | Transposase                                                                                                                                                         |
| 346 | 197 | 0.01 | A0A1J5HJ85 | <i>Porphyromonadaceae bacterium</i>   | DEAD/DEAH box helicase                                                                                                                                              |
| 347 | 197 | 0.01 | A0A1J5HRP9 | <i>Porphyromonadaceae bacterium</i>   | Uncharacterized protein                                                                                                                                             |
| 348 | 197 | 0.01 | E4T3A4     | <i>Paludibacter propionicipigenes</i> | Endonuclease MutS2 (EC 3.1.-.-)                                                                                                                                     |
| 349 | 197 | 0.01 | E4T5K5     | <i>Paludibacter propionicipigenes</i> | ATP-dependent DNA helicase RecQ (EC 3.6.1.-)                                                                                                                        |
| 350 | 197 | 0.01 | E4T766     | <i>Paludibacter propionicipigenes</i> | Glutamine--tRNA ligase (EC 6.1.1.18)                                                                                                                                |
| 351 | 196 | 0.01 | A0A1E4EB10 | <i>Paludibacter sp.</i>               | Uncharacterized protein                                                                                                                                             |
| 352 | 196 | 0.01 | A0A1E4EHT2 | <i>Paludibacter sp.</i>               | Uncharacterized protein                                                                                                                                             |
| 353 | 196 | 0.01 | A0A1J5HF31 | <i>Porphyromonadaceae bacterium</i>   | Cell division protein FtsK                                                                                                                                          |
| 354 | 196 | 0.01 | E4T428     | <i>Paludibacter propionicipigenes</i> | Glutamate--tRNA ligase (EC 6.1.1.17) (Glutamyl-tRNA synthetase) (GluRS)                                                                                             |
| 355 | 196 | 0.01 | F8X245     | <i>Dysgonomonas mossii</i>            | UDP-glucose 4-epimerase                                                                                                                                             |

|     |     |      |            |                                       |                                                                                                                                                                                                                                                                                        |
|-----|-----|------|------------|---------------------------------------|----------------------------------------------------------------------------------------------------------------------------------------------------------------------------------------------------------------------------------------------------------------------------------------|
| 356 | 196 | 0.01 |            |                                       |                                                                                                                                                                                                                                                                                        |
| 357 | 195 | 0.01 | A0A1M3MAV7 | <i>Paludibacter sp. 47-17</i>         | Uncharacterized protein                                                                                                                                                                                                                                                                |
| 358 | 195 | 0.01 | E4T4F1     | <i>Paludibacter propionicipigenes</i> | Lytic transglycosylase catalytic                                                                                                                                                                                                                                                       |
| 359 | 195 | 0.01 | E4T4H8     | <i>Paludibacter propionicipigenes</i> | RelA/SpoT family protein (EC 2.7.6.5)                                                                                                                                                                                                                                                  |
| 360 | 195 | 0.01 | E4T4P1     | <i>Paludibacter propionicipigenes</i> | Peptidase U34 dipeptidase                                                                                                                                                                                                                                                              |
| 361 | 195 | 0.01 | E4T5T2     | <i>Paludibacter propionicipigenes</i> | Holliday junction ATP-dependent DNA helicase RuvB (EC 3.6.4.12)                                                                                                                                                                                                                        |
| 362 | 195 | 0.01 |            |                                       |                                                                                                                                                                                                                                                                                        |
| 363 | 195 | 0.01 |            |                                       |                                                                                                                                                                                                                                                                                        |
| 364 | 194 | 0.01 | A0A0N7IFQ6 | <i>Bacteroides cellulosilyticus</i>   | Periplasmic beta-glucosidase (EC 3.2.1.21)                                                                                                                                                                                                                                             |
| 365 | 194 | 0.01 | A0A1F3JYD9 | <i>Bacteroidetes bacterium</i>        | Uncharacterized protein                                                                                                                                                                                                                                                                |
| 366 | 194 | 0.01 | A0A1J5HD63 | <i>Porphyromonadaceae bacterium</i>   | RelA/SpoT family protein                                                                                                                                                                                                                                                               |
| 367 | 194 | 0.01 | E4T2Y0     | <i>Paludibacter propionicipigenes</i> | UDP-N-acetylglucosamine 1-carboxyvinyltransferase (EC 2.5.1.7) (Enoylpyruvate transferase) (UDP-N-acetylglucosamine enolpyruvyl transferase) (EPT)                                                                                                                                     |
| 368 | 194 | 0.01 | E4T4K5     | <i>Paludibacter propionicipigenes</i> | UDP-N-acetylmuramoyl-L-alanyl-D-glutamate--2,6-diaminopimelate ligase (EC 6.3.2.13) (Meso-A2pm-adding enzyme) (Meso-diaminopimelate-adding enzyme) (UDP-MurNAc-L-Ala-D-Glu:meso-diaminopimelate ligase) (UDP-MurNAc-tripeptide synthetase) (UDP-N-acetylmuramyl-tripeptide synthetase) |
| 369 | 193 | 0.01 | A0A076NZ72 | <i>Flavobacterium psychrophilum</i>   | Uncharacterized protein                                                                                                                                                                                                                                                                |
| 370 | 193 | 0.01 | E4T6L4     | <i>Paludibacter propionicipigenes</i> | Succinylglutamate desuccinylase/aspartoacylase                                                                                                                                                                                                                                         |
| 371 | 192 | 0.01 | A0A1J5HBA6 | <i>Porphyromonadaceae bacterium</i>   | DNA primase (EC 2.7.7.-)                                                                                                                                                                                                                                                               |
| 372 | 192 | 0.01 | E4T1E6     | <i>Paludibacter propionicipigenes</i> | Protein translocase subunit SecA                                                                                                                                                                                                                                                       |
| 373 | 192 | 0.01 | E4T451     | <i>Paludibacter propionicipigenes</i> | Histidine biosynthesis bifunctional protein HisB [Includes: Imidazoleglycerol-phosphate dehydratase (IGPD) (EC 4.2.1.19); Histidinol-phosphatase (EC 3.1.3.15)]                                                                                                                        |
| 374 | 192 | 0.01 | E4T591     | <i>Paludibacter propionicipigenes</i> | 2,3-bisphosphoglycerate-independent phosphoglycerate mutase (BPG-independent PGAM) (Phosphoglyceromutase) (iPGM) (EC 5.4.2.12)                                                                                                                                                         |
| 375 | 192 | 0.01 | E4T8R6     | <i>Paludibacter propionicipigenes</i> | Lysine--tRNA ligase (EC 6.1.1.6) (Lysyl-tRNA synthetase) (LysRS)                                                                                                                                                                                                                       |
| 376 | 191 | 0.01 | A0A1J5HBR6 | <i>Porphyromonadaceae bacterium</i>   | Protein translocase subunit SecY                                                                                                                                                                                                                                                       |
| 377 | 190 | 0.01 | A0A1Q3M3M9 | <i>Bacteroidales bacterium</i>        | Metal-independent alpha-mannosidase                                                                                                                                                                                                                                                    |
| 378 | 190 | 0.01 | E4T3C0     | <i>Paludibacter propionicipigenes</i> | Aminotransferase class I and II                                                                                                                                                                                                                                                        |

|     |     |      |            |                                     |                                                                                                                                                                                                                                                            |
|-----|-----|------|------------|-------------------------------------|------------------------------------------------------------------------------------------------------------------------------------------------------------------------------------------------------------------------------------------------------------|
| 379 | 190 | 0.01 | E4T775     | <i>Paludibacter propionigenes</i>   | Ribonuclease R (RNase R) (EC 3.1.13.1)                                                                                                                                                                                                                     |
| 380 | 190 | 0.01 | F5UKT4     | <i>Microcoleus vaginatus</i>        | Polymorphic outer membrane protein                                                                                                                                                                                                                         |
| 381 | 189 | 0.01 | A0A0D5N7W1 | <i>Geobacter sulfurreducens</i>     | ATPase                                                                                                                                                                                                                                                     |
| 382 | 189 | 0.01 | A0A1E4EG73 | <i>Paludibacter sp.</i>             | Acetate kinase (EC 2.7.2.1) (Acetokinase)                                                                                                                                                                                                                  |
| 383 | 189 | 0.01 | A0A1J5HEW8 | <i>Porphyromonadaceae bacterium</i> | ABC transporter                                                                                                                                                                                                                                            |
| 384 | 189 | 0.01 | A0A1J5HFI3 | <i>Porphyromonadaceae bacterium</i> | Glutamine--fructose-6-phosphate aminotransferase [isomerizing] (EC 2.6.1.16) (D-fructose-6-phosphate amidotransferase) (GFAT) (Glucosamine-6-phosphate synthase) (Hexosephosphate aminotransferase) (L-glutamine--D-fructose-6-phosphate amidotransferase) |
| 385 | 189 | 0.01 | A0A1M3MEB3 | <i>Paludibacter sp.</i>             | Uncharacterized protein                                                                                                                                                                                                                                    |
| 386 | 189 | 0.01 | A0A1M3MF51 | <i>Paludibacter sp.</i>             | Translation initiation factor IF-2                                                                                                                                                                                                                         |
| 387 | 189 | 0.01 | A0A1Q3LR33 | <i>Bacteroidales bacterium</i>      | Inosine 5-monophosphate dehydrogenase                                                                                                                                                                                                                      |
| 388 | 188 | 0.01 | A0A015TUI8 | <i>Bacteroides fragilis</i>         | AAA domain protein                                                                                                                                                                                                                                         |
| 389 | 188 | 0.01 | A0A1M3DK57 | <i>Bacteroidales bacterium</i>      | Outer membrane protein assembly factor BamA                                                                                                                                                                                                                |
| 390 | 188 | 0.01 | A0A1M3MFN9 | <i>Paludibacter sp.</i>             | Ribulokinase (EC 2.7.1.16)                                                                                                                                                                                                                                 |
| 391 | 188 | 0.01 | A0A1Q3QIV6 | <i>Bacteroidia bacterium</i>        | Uncharacterized protein                                                                                                                                                                                                                                    |
| 392 | 188 | 0.01 | E4T3Y1     | <i>Paludibacter propionigenes</i>   | Glutamine-dependent NAD(+) synthetase (EC 6.3.5.1) (NAD(+) synthase [glutamine-hydrolyzing])                                                                                                                                                               |
| 393 | 188 | 0.01 | E4T841     | <i>Paludibacter propionigenes</i>   | Peptidyl-dipeptidase Dcp (EC 3.4.15.5)                                                                                                                                                                                                                     |
| 394 | 187 | 0.01 | A0A1E4EG51 | <i>Paludibacter sp.</i>             | Symporter                                                                                                                                                                                                                                                  |
| 395 | 187 | 0.01 | A0A1J5HWJ7 | <i>Porphyromonadaceae bacterium</i> | UvrABC system protein B (Protein UvrB) (Excinuclease ABC subunit B)                                                                                                                                                                                        |
| 396 | 187 | 0.01 | A0A1M3DH56 | <i>Bacteroidales bacterium</i>      | Bifunctional purine biosynthesis protein PurH [Includes: IMP cyclohydrolase (EC 3.5.4.10) (IMP synthase) (Inosinicase) (ATIC); Phosphoribosylaminoimidazolecarboxamide formyltransferase (EC 2.1.2.3) (AICAR transformylase)]                              |
| 397 | 187 | 0.01 | B7B780     | <i>Parabacteroides johnsonii</i>    | Glycosyl hydrolase family 2, sugar binding domain protein (Fragment)                                                                                                                                                                                       |
| 398 | 187 | 0.01 | E4T1D9     | <i>Paludibacter propionigenes</i>   | RNA-metabolising metallo-beta-lactamase                                                                                                                                                                                                                    |
| 399 | 187 | 0.01 | E4T405     | <i>Paludibacter propionigenes</i>   | Glycogen synthase (UDP-glucose) (EC 2.4.1.21)                                                                                                                                                                                                              |
| 400 | 187 | 0.01 | E4T418     | <i>Paludibacter propionigenes</i>   | Uncharacterized protein                                                                                                                                                                                                                                    |
| 401 | 187 | 0.01 | E4T618     | <i>Paludibacter propionigenes</i>   | DNA topoisomerase (ATP-hydrolyzing) (EC 5.99.1.3)                                                                                                                                                                                                          |



|     |     |      |            |                                     |                                                                                                                                      |
|-----|-----|------|------------|-------------------------------------|--------------------------------------------------------------------------------------------------------------------------------------|
| 402 | 187 | 0.01 | E4T6E7     | <i>Paludibacter propionigenes</i>   | 3-oxoacyl-[acyl-carrier-protein] synthase 2 (EC 2.3.1.179)                                                                           |
| 403 | 186 | 0.01 | A0A023UNE7 | <i>Magnusiomyces ingens</i>         | ATP synthase subunit a                                                                                                               |
| 404 | 186 | 0.01 | A0A1J5B2X9 | <i>Bacteroidetes bacterium</i>      | Transglycosylase                                                                                                                     |
| 405 | 186 | 0.01 | A0A1J5HIH9 | <i>Porphyromonadaceae bacterium</i> | Polysaccharide biosynthesis protein                                                                                                  |
| 406 | 186 | 0.01 | A0A1J5HJ31 | <i>Porphyromonadaceae bacterium</i> | DNA repair protein RadA                                                                                                              |
| 407 | 186 | 0.01 | E4T3B8     | <i>Paludibacter propionigenes</i>   | Uncharacterized protein                                                                                                              |
| 408 | 186 | 0.01 | E4T543     | <i>Paludibacter propionigenes</i>   | N-acetylornithine carbamoyltransferase (EC 2.1.3.9)                                                                                  |
| 409 | 185 | 0.01 | A0A1F3MS16 | <i>Bacteroidetes bacterium</i>      | Uncharacterized protein (Fragment)                                                                                                   |
| 410 | 185 | 0.01 | A0A1J5HBM9 | <i>Porphyromonadaceae bacterium</i> | Uncharacterized protein                                                                                                              |
| 411 | 185 | 0.01 | A0A1M3FTD4 | <i>Bacteroidia bacterium</i>        | Beta-galactosidase (EC 3.2.1.23) (Lactase)                                                                                           |
| 412 | 185 | 0.01 | A0A1M3M8G5 | <i>Paludibacter sp.</i>             | 1,4-alpha-glucan branching enzyme (EC 2.4.1.18)                                                                                      |
| 413 | 185 | 0.01 | E4T772     | <i>Paludibacter propionigenes</i>   | DNA topoisomerase 1 (EC 5.99.1.2) (DNA topoisomerase I)                                                                              |
| 414 | 185 | 0.01 | K9L486     | <i>Magnusiomyces magnusii</i>       | NADH-ubiquinone oxidoreductase chain 4L (EC 1.6.5.3)                                                                                 |
| 415 | 184 | 0.01 | A0A1M3MCQ7 | <i>Paludibacter sp.</i>             | 30S ribosomal protein S1                                                                                                             |
| 416 | 184 | 0.01 | E4T658     | <i>Paludibacter propionigenes</i>   | 3-hydroxyacyl-CoA dehydrogenase NAD-binding protein                                                                                  |
| 417 | 184 | 0.01 | E4T7N5     | <i>Paludibacter propionigenes</i>   | Histidine--tRNA ligase (EC 6.1.1.21) (Histidyl-tRNA synthetase) (HisRS)                                                              |
| 418 | 184 | 0.01 | E4T8A5     | <i>Paludibacter propionigenes</i>   | Agmatine deiminase (EC 3.5.3.12)                                                                                                     |
| 419 | 184 | 0.01 | E4T8A7     | <i>Paludibacter propionigenes</i>   | Carboxynorspermidine dehydrogenase                                                                                                   |
| 420 | 183 | 0.01 | A0A0D5N8M0 | <i>Geobacter sulfurreducens</i>     | MgtE integral membrane protein                                                                                                       |
| 421 | 183 | 0.01 | A0A1J5HIR8 | <i>Porphyromonadaceae bacterium</i> | Ammonium transporter                                                                                                                 |
| 422 | 183 | 0.01 | A0A1J5HK82 | <i>Porphyromonadaceae bacterium</i> | 1-deoxy-D-xylulose-5-phosphate synthase (EC 2.2.1.7) (1-deoxyxylulose-5-phosphate synthase) (DXP synthase) (DXPS)                    |
| 423 | 183 | 0.01 | A0A1M3M8L6 | <i>Paludibacter sp.</i>             | ATP-dependent DNA helicase RecQ                                                                                                      |
| 424 | 183 | 0.01 | E4T130     | <i>Paludibacter propionigenes</i>   | GDP-mannose 4,6-dehydratase (EC 4.2.1.47) (GDP-D-mannose dehydratase)                                                                |
| 425 | 183 | 0.01 | E4T6F0     | <i>Paludibacter propionigenes</i>   | Ribosome-binding ATPase YchF                                                                                                         |
| 426 | 183 | 0.01 | G4KSU6     | <i>Oscillibacter valericigenes</i>  | DNA-directed RNA polymerase subunit beta (RNAP subunit beta) (EC 2.7.7.6) (RNA polymerase subunit beta) (Transcriptase subunit beta) |
| 427 | 183 | 0.01 |            |                                     |                                                                                                                                      |

|     |     |      |            |                                       |                                                                                                                                                                             |
|-----|-----|------|------------|---------------------------------------|-----------------------------------------------------------------------------------------------------------------------------------------------------------------------------|
| 428 | 182 | 0.01 | A0A161LUJ1 | <i>Paludibacter jiangxiensis</i>      | L-arabinose isomerase (EC 5.3.1.4)                                                                                                                                          |
| 429 | 182 | 0.01 | A0A1J5HLA6 | <i>Porphyromonadaceae bacterium</i>   | Peptidylprolyl isomerase (EC 5.2.1.8)                                                                                                                                       |
| 430 | 182 | 0.01 | A0A1Q3LMQ1 | <i>Bacteroidales bacterium</i>        | Acriflavin resistance protein                                                                                                                                               |
| 431 | 182 | 0.01 | A0A1Q3QB76 | <i>Bacteroidia bacterium</i>          | Transaldolase (EC 2.2.1.2)                                                                                                                                                  |
| 432 | 182 | 0.01 | E4T197     | <i>Paludibacter propionicipigenes</i> | Uncharacterized protein                                                                                                                                                     |
| 433 | 182 | 0.01 | E4T300     | <i>Paludibacter propionicipigenes</i> | ABC transporter related protein                                                                                                                                             |
| 434 | 181 | 0.01 | A0A1J5HH39 | <i>Porphyromonadaceae bacterium</i>   | Fe-S cluster assembly protein SufD                                                                                                                                          |
| 435 | 181 | 0.01 | A0A1J5HIJ9 | <i>Porphyromonadaceae bacterium</i>   | Aerotolerance regulator Bata                                                                                                                                                |
| 436 | 181 | 0.01 | E4T3L2     | <i>Paludibacter propionicipigenes</i> | Imidazole glycerol phosphate synthase subunit HisF (EC 4.1.3.-) (IGP synthase cyclase subunit) (IGP synthase subunit HisF) (ImGP synthase subunit HisF) (IGPS subunit HisF) |
| 437 | 181 | 0.01 |            |                                       |                                                                                                                                                                             |
| 438 | 180 | 0.01 | A0A023UM83 | <i>Magnusiomyces ingens</i>           | NADH-ubiquinone oxidoreductase chain 6 (EC 1.6.5.3)                                                                                                                         |
| 439 | 180 | 0.01 | A0A0F5J3W9 | <i>Parabacteroides sp.</i>            | SusC/RagA family TonB-linked outer membrane protein                                                                                                                         |
| 440 | 180 | 0.01 | A0A1M3DKS7 | <i>Bacteroidales bacterium</i>        | Uncharacterized protein                                                                                                                                                     |
| 441 | 180 | 0.01 | A0A1Q3QDG3 | <i>Bacteroidia bacterium</i>          | SusC/RagA family TonB-linked outer membrane protein                                                                                                                         |
| 442 | 180 | 0.01 | E4T2P1     | <i>Paludibacter propionicipigenes</i> | 3-methyl-2-oxobutanoate hydroxymethyltransferase (EC 2.1.2.11) (Ketopantoate hydroxymethyltransferase) (KPHMT)                                                              |
| 443 | 180 | 0.01 | E4T3C5     | <i>Paludibacter propionicipigenes</i> | Periplasmic binding protein                                                                                                                                                 |
| 444 | 180 | 0.01 | E4T414     | <i>Paludibacter propionicipigenes</i> | Uncharacterized protein                                                                                                                                                     |
| 445 | 180 | 0.01 | E4T7C5     | <i>Paludibacter propionicipigenes</i> | Uridylate kinase (UK) (EC 2.7.4.22) (Uridine monophosphate kinase) (UMP kinase) (UMPK)                                                                                      |
| 446 | 180 | 0.01 | E4T836     | <i>Paludibacter propionicipigenes</i> | Phosphoglycerate mutase                                                                                                                                                     |
| 447 | 179 | 0.01 | A0A171A7A4 | <i>Paludibacter jiangxiensis</i>      | Methionine--tRNA ligase (EC 6.1.1.10) (Methionyl-tRNA synthetase) (MetRS)                                                                                                   |
| 448 | 179 | 0.01 | A0A1J5HVJ6 | <i>Porphyromonadaceae bacterium</i>   | MATE family efflux transporter                                                                                                                                              |
| 449 | 179 | 0.01 | A0A1M5KAB4 | <i>Dysgonomonas macrotermitis</i>     | Transposase InsO and inactivated derivatives                                                                                                                                |
| 450 | 179 | 0.01 | E4T073     | <i>Paludibacter propionicipigenes</i> | Chaperone protein ClpB                                                                                                                                                      |
| 451 | 179 | 0.01 | E4T0C8     | <i>Paludibacter propionicipigenes</i> | Fmu (Sun) domain protein                                                                                                                                                    |
| 452 | 179 | 0.01 | E4T293     | <i>Paludibacter propionicipigenes</i> | Tryptophan synthase beta chain (EC 4.2.1.20)                                                                                                                                |
| 453 | 179 | 0.01 | E4T3S1     | <i>Paludibacter propionicipigenes</i> | Glucose-1-phosphate thymidyltransferase (EC 2.7.7.24)                                                                                                                       |

|     |     |      |            |                                       |                                                                                                             |
|-----|-----|------|------------|---------------------------------------|-------------------------------------------------------------------------------------------------------------|
| 454 | 179 | 0.01 | E4T665     | <i>Paludibacter propionicipigenes</i> | D-alanine--D-alanine ligase (EC 6.3.2.4) (D-Ala-D-Ala ligase) (D-alanylalanine synthetase)                  |
| 455 | 178 | 0.01 | A0A1M3DLX8 | <i>Bacteroidales bacterium</i>        | Uncharacterized protein                                                                                     |
| 456 | 178 | 0.01 | E4T3A2     | <i>Paludibacter propionicipigenes</i> | Enolase (EC 4.2.1.11) (2-phospho-D-glycerate hydro-lyase) (2-phosphoglycerate dehydratase)                  |
| 457 | 178 | 0.01 | E4T429     | <i>Paludibacter propionicipigenes</i> | Elongation factor Ts (EF-Ts)                                                                                |
| 458 | 178 | 0.01 | E4T5S2     | <i>Paludibacter propionicipigenes</i> | Pyruvate flavodoxin/ferredoxin oxidoreductase domain protein                                                |
| 459 | 177 | 0.01 | A0A133Y220 | <i>Bacteroidales bacterium</i>        | Response regulator receiver domain protein                                                                  |
| 460 | 177 | 0.01 | A0A1J5HJ83 | <i>Porphyromonadaceae bacterium</i>   | Threonine synthase                                                                                          |
| 461 | 177 | 0.01 | A0A1M3MDT6 | <i>Paludibacter sp.</i>               | tRNA uridine 5-carboxymethylaminomethyl modification enzyme MnmG (Glucose-inhibited division protein A)     |
| 462 | 177 | 0.01 | A0A1Q3QCA7 | <i>Bacteroidia bacterium</i>          | Glycosyl hydrolase family 31                                                                                |
| 463 | 177 | 0.01 | E4T088     | <i>Paludibacter propionicipigenes</i> | Amylo-alpha-16-glucosidase                                                                                  |
| 464 | 177 | 0.01 | E4T3V0     | <i>Paludibacter propionicipigenes</i> | Cysteine desulfurase (EC 2.8.1.7)                                                                           |
| 465 | 177 | 0.01 | E4T5J8     | <i>Paludibacter propionicipigenes</i> | Aminoacyl-histidine dipeptidase                                                                             |
| 466 | 177 | 0.01 | E4T7Z2     | <i>Paludibacter propionicipigenes</i> | Glycosyl transferase family 2                                                                               |
| 467 | 176 | 0.01 | A0A1M3MDP9 | <i>Paludibacter sp.</i>               | DNA-directed DNA polymerase (EC 2.7.7.7)                                                                    |
| 468 | 176 | 0.01 | E4T575     | <i>Paludibacter propionicipigenes</i> | Two component transcriptional regulator, winged helix family                                                |
| 469 | 175 | 0.01 | A0A1J5HL29 | <i>Porphyromonadaceae bacterium</i>   | Peptidase S9                                                                                                |
| 470 | 175 | 0.01 | A0A1M3MBJ3 | <i>Paludibacter sp.</i>               | Thiol:disulfide interchange protein                                                                         |
| 471 | 175 | 0.01 | A0A1M3MF71 | <i>Paludibacter sp.</i>               | Oxidoreductase                                                                                              |
| 472 | 175 | 0.01 | E4T2L1     | <i>Paludibacter propionicipigenes</i> | LL-diaminopimelate aminotransferase (DAP-AT) (DAP-aminotransferase) (LL-DAP-aminotransferase) (EC 2.6.1.83) |
| 473 | 175 | 0.01 | E4T3A7     | <i>Paludibacter propionicipigenes</i> | ABC transporter related protein                                                                             |
| 474 | 175 | 0.01 | E4T7X5     | <i>Paludibacter propionicipigenes</i> | Peptidase M23                                                                                               |
| 475 | 175 | 0.01 | K5ZFA7     | <i>Parabacteroides merdae</i>         | Pyruvate formate-lyase                                                                                      |
| 476 | 175 | 0.01 | S3C5M7     | <i>Ophiostoma piceae</i>              | Uncharacterized protein                                                                                     |
| 477 | 175 | 0.01 | U6RUP9     | <i>Bacteroides sp.</i>                | Uncharacterized protein                                                                                     |
| 478 | 174 | 0.01 | A0A1F3H388 | <i>Bacteroidetes bacterium</i>        | Uncharacterized protein                                                                                     |

|     |     |      |            |                                     |                                                                                                                                      |
|-----|-----|------|------------|-------------------------------------|--------------------------------------------------------------------------------------------------------------------------------------|
| 479 | 174 | 0.01 | A0A1Q3QI16 | <i>Bacteroidia bacterium</i>        | SusC/RagA family TonB-linked outer membrane protein                                                                                  |
| 480 | 174 | 0.01 | E4T338     | <i>Paludibacter propionigenes</i>   | Carboxyl transferase (EC 6.4.1.3)                                                                                                    |
| 481 | 174 | 0.01 | E4T4P4     | <i>Paludibacter propionigenes</i>   | TonB-dependent receptor                                                                                                              |
| 482 | 173 | 0.01 | A0A095ZHM4 | <i>Prevotella buccalis</i>          | Gliding motility protein                                                                                                             |
| 483 | 173 | 0.01 | A0A1F3M9H0 | <i>Bacteroidetes bacterium</i>      | GMP synthase [glutamine-hydrolyzing] (EC 6.3.5.2) (Fragment)                                                                         |
| 484 | 173 | 0.01 | E4T0H2     | <i>Paludibacter propionigenes</i>   | Uncharacterized protein                                                                                                              |
| 485 | 172 | 0.01 | A0A077XLW5 | <i>Sphinx1.76-related DNA</i>       | Replication protein                                                                                                                  |
| 486 | 172 | 0.01 | A0A174TJ83 | <i>Parabacteroides distasonis</i>   | Methylmalonyl-CoA mutase large subunit (EC 5.4.99.2)                                                                                 |
| 487 | 172 | 0.01 | A0A1J5HPZ5 | <i>Porphyromonadaceae bacterium</i> | Bifunctional aspartate kinase/homoserine dehydrogenase I                                                                             |
| 488 | 172 | 0.01 | A0A1M3MEH0 | <i>Paludibacter sp.</i>             | SusC/RagA family TonB-linked outer membrane protein                                                                                  |
| 489 | 172 | 0.01 | E4T1J0     | <i>Paludibacter propionigenes</i>   | Purine or other phosphorylase family 1                                                                                               |
| 490 | 171 | 0.01 | A0A1M3DCQ2 | <i>Bacteroidales bacterium</i>      | DNA-directed RNA polymerase subunit beta (RNAP subunit beta) (EC 2.7.7.6) (RNA polymerase subunit beta) (Transcriptase subunit beta) |
| 491 | 171 | 0.01 | R7LEV7     | <i>Prevotella sp.</i>               | Type III restriction protein res subunit                                                                                             |
| 492 | 171 | 0.01 |            |                                     |                                                                                                                                      |
| 493 | 170 | 0.01 | A0A0J6FCE6 | <i>Parabacteroides goldsteinii</i>  | Uncharacterized protein                                                                                                              |
| 494 | 170 | 0.01 | A0A1J5HZK4 | <i>Porphyromonadaceae bacterium</i> | NADH-quinone oxidoreductase subunit C                                                                                                |
| 495 | 170 | 0.01 | A0A1M3M9Y9 | <i>Paludibacter sp.</i>             | Uncharacterized protein                                                                                                              |
| 496 | 170 | 0.01 | E4T335     | <i>Paludibacter propionigenes</i>   | Nucleotide sugar dehydrogenase                                                                                                       |
| 497 | 170 | 0.01 | E4T396     | <i>Paludibacter propionigenes</i>   | Aconitase (EC 4.2.1.3)                                                                                                               |
| 498 | 170 | 0.01 | E4T8I1     | <i>Paludibacter propionigenes</i>   | Tryptophan synthase alpha chain (EC 4.2.1.20)                                                                                        |
| 499 | 169 | 0.01 | A0A170Z6B9 | <i>Paludibacter jiangxiensis</i>    | Elongation factor G (EF-G)                                                                                                           |
| 500 | 169 | 0.01 | A0A1E4EGX9 | <i>Paludibacter sp.</i>             | Uncharacterized protein                                                                                                              |

**Table S5a.** Functional overview of M2A community (top 500 rank only).

| Rank | Count | Abundance | ID         | Organism                            | Protein Names                                                                                                                            |
|------|-------|-----------|------------|-------------------------------------|------------------------------------------------------------------------------------------------------------------------------------------|
| 1    | 5150  | 0.16      | AOA0D5N8Q4 | <i>Geobacter sulfurreducens</i>     | Transposase                                                                                                                              |
| 2    | 3422  | 0.10      | E1QK39     | <i>Desulfarculus baarsii</i>        | Helicase domain protein                                                                                                                  |
| 3    | 3198  | 0.10      | AOA0A8WNU3 | <i>Geobacter sp.</i>                | Protein TraC                                                                                                                             |
| 4    | 3107  | 0.09      | A0LQ17     | <i>Syntrophobacter fumaroxidans</i> | Helicase domain protein                                                                                                                  |
| 5    | 2629  | 0.08      | Q39Y12     | <i>Geobacter metallireducens</i>    | DNA-directed RNA polymerase subunit beta' (RNAP subunit beta') (EC 2.7.7.6) (RNA polymerase subunit beta') (Transcriptase subunit beta') |
| 6    | 2512  | 0.08      | Q748X8     | <i>Geobacter sulfurreducens</i>     | Elongation factor Tu (EF-Tu)                                                                                                             |
| 7    | 2494  | 0.08      | Q39RM9     | <i>Geobacter metallireducens</i>    | Membrane protein, putative                                                                                                               |
| 8    | 2485  | 0.08      | A1AKK8     | <i>Pelobacter propionicus</i>       | Uncharacterized protein                                                                                                                  |
| 9    | 2398  | 0.07      |            |                                     |                                                                                                                                          |
| 10   | 2396  | 0.07      | A0A1G0LE89 | <i>Geobacteraceae bacterium</i>     | Aconitate hydratase (Aconitase) (EC 4.2.1.3)                                                                                             |
| 11   | 2391  | 0.07      | Q748Y6     | <i>Geobacter sulfurreducens</i>     | DNA-directed RNA polymerase subunit beta (RNAP subunit beta) (EC 2.7.7.6) (RNA polymerase subunit beta) (Transcriptase subunit beta)     |
| 12   | 2284  | 0.07      |            |                                     |                                                                                                                                          |
| 13   | 2234  | 0.07      | AOA0D5N7W1 | <i>Geobacter sulfurreducens</i>     | ATPase                                                                                                                                   |
| 14   | 2234  | 0.07      | B3EB58     | <i>Geobacter lovleyi</i>            | Uncharacterized protein                                                                                                                  |
| 15   | 2228  | 0.07      |            |                                     |                                                                                                                                          |
| 16   | 2184  | 0.07      | E1QK33     | <i>Desulfarculus baarsii</i>        | ATP-binding region ATPase domain protein                                                                                                 |
| 17   | 2061  | 0.06      | Q747C7     | <i>Geobacter sulfurreducens</i>     | 60 kDa chaperonin (GroEL protein) (Protein Cpn60)                                                                                        |
| 18   | 2017  | 0.06      | A5GAB4     | <i>Geobacter sulfurreducens</i>     | Putative GAF sensor protein                                                                                                              |
| 19   | 2007  | 0.06      | Q74BB9     | <i>Geobacter sulfurreducens</i>     | TraG family protein                                                                                                                      |
| 20   | 1993  | 0.06      | Q748Y8     | <i>Geobacter sulfurreducens</i>     | Elongation factor G 2 (EF-G 2)                                                                                                           |
| 21   | 1979  | 0.06      | Q74AK2     | <i>Geobacter sulfurreducens</i>     | Sodium/solute symporter family protein                                                                                                   |
| 22   | 1935  | 0.06      | A0A1G0M577 | <i>Geobacteraceae bacterium</i>     | Uncharacterized protein                                                                                                                  |
| 23   | 1928  | 0.06      | Q74BB8     | <i>Geobacter sulfurreducens</i>     | Metal-dependent phosphohydrolase                                                                                                         |
| 24   | 1851  | 0.06      | Q39QB9     | <i>Geobacter metallireducens</i>    | NADH dehydrogenase I, M subunit                                                                                                          |
| 25   | 1851  | 0.06      | Q74BC2     | <i>Geobacter sulfurreducens</i>     | Integrative genetic element Gsu56, integrase                                                                                             |
| 26   | 1832  | 0.06      | Q749A7     | <i>Geobacter sulfurreducens</i>     | Protein translocase subunit SecY                                                                                                         |
| 27   | 1768  | 0.05      | AOA0D5N8M0 | <i>Geobacter sulfurreducens</i>     | MgtE integral membrane protein                                                                                                           |
| 28   | 1755  | 0.05      | Q74B77     | <i>Geobacter sulfurreducens</i>     | Uncharacterized protein                                                                                                                  |
| 29   | 1738  | 0.05      | A1AKN8     | <i>Pelobacter propionicus</i>       | Resolvase, N-terminal domain protein                                                                                                     |
| 30   | 1723  | 0.05      | A0A0B5BJ81 | <i>Geobacter pickeringii</i>        | NADH-quinone oxidoreductase subunit D (EC 1.6.5.11) (NADH dehydrogenase I subunit D) (NDH-1 subunit D)                                   |

|    |      |      |            |                                      |                                                                                                                                                                                          |
|----|------|------|------------|--------------------------------------|------------------------------------------------------------------------------------------------------------------------------------------------------------------------------------------|
| 31 | 1715 | 0.05 |            |                                      |                                                                                                                                                                                          |
| 32 | 1661 | 0.05 |            |                                      |                                                                                                                                                                                          |
| 33 | 1624 | 0.05 | Q39Q43     | <i>Geobacter metallireducens</i>     | Pyruvate-flavodoxin oxidoreductase (EC 1.2.7.-)                                                                                                                                          |
| 34 | 1616 | 0.05 | AOA0B5BCT5 | <i>Geobacter pickeringii</i>         | NADH dehydrogenase                                                                                                                                                                       |
| 35 | 1612 | 0.05 | AOA0B5BF68 | <i>Geobacter pickeringii</i>         | CRISPR-associated protein Cas3                                                                                                                                                           |
| 36 | 1611 | 0.05 | AOA1T4LT91 | <i>Geobacter thiogenes</i>           | Putative transposase                                                                                                                                                                     |
| 37 | 1610 | 0.05 | Q39QB2     | <i>Geobacter metallireducens</i>     | NADH dehydrogenase I, F subunit                                                                                                                                                          |
| 38 | 1606 | 0.05 | AOA1G0M9J2 | <i>Geobacteraceae bacterium</i>      | Uncharacterized protein                                                                                                                                                                  |
| 39 | 1601 | 0.05 | AOA1T4RHG2 | <i>Geobacter thiogenes</i>           | Nif-specific regulatory protein                                                                                                                                                          |
| 40 | 1576 | 0.05 | E1QK40     | <i>Desulfarculus baarsii</i>         | DNA-cytosine methyltransferase                                                                                                                                                           |
| 41 | 1545 | 0.05 | Q74FK9     | <i>Geobacter sulfurreducens</i>      | Sigma-54-dependent transcriptional response regulator                                                                                                                                    |
| 42 | 1543 | 0.05 | B9M4C2     | <i>Geobacter daltonii</i>            | Squalene cyclase                                                                                                                                                                         |
| 43 | 1523 | 0.05 | AOA1S0XXD8 | <i>Rhodanobacter sp.</i>             | Histidine kinase                                                                                                                                                                         |
| 44 | 1491 | 0.05 | AOA1G0MUH0 | <i>Geobacteraceae bacterium</i>      | Integrase                                                                                                                                                                                |
| 45 | 1486 | 0.05 | Q747H5     | <i>Geobacter sulfurreducens</i>      | K(+)-insensitive pyrophosphate-energized proton pump (EC 3.6.1.1) (Membrane-bound proton-translocating pyrophosphatase) (Pyrophosphate-energized inorganic pyrophosphatase) (H(+)-PPase) |
| 46 | 1480 | 0.04 | AOA0A8WLBO | <i>Geobacter sp.</i>                 | Protein TraH                                                                                                                                                                             |
| 47 | 1465 | 0.04 | B3EB49     | <i>Geobacter lovleyi</i>             | Uncharacterized protein                                                                                                                                                                  |
| 48 | 1458 | 0.04 | AOA1F8XVG3 | <i>Deltaproteobacteria bacterium</i> | Helicase                                                                                                                                                                                 |
| 49 | 1456 | 0.04 | AOA0B5BDJ5 | <i>Geobacter pickeringii</i>         | NADH-quinone oxidoreductase subunit H (EC 1.6.5.11) (NADH dehydrogenase I subunit H) (NDH-1 subunit H)                                                                                   |
| 50 | 1455 | 0.04 | Q747X9     | <i>Geobacter sulfurreducens</i>      | Isoleucine--tRNA ligase (EC 6.1.1.5) (Isoleucyl-tRNA synthetase) (IleRS)                                                                                                                 |
| 51 | 1450 | 0.04 | AOA0D5N8S3 | <i>Geobacter sulfurreducens</i>      | NADH dehydrogenase                                                                                                                                                                       |
| 52 | 1449 | 0.04 | Q74B80     | <i>Geobacter sulfurreducens</i>      | Uncharacterized protein                                                                                                                                                                  |
| 53 | 1448 | 0.04 | AOA0B5BF21 | <i>Geobacter pickeringii</i>         | Glycosyl transferase family 1                                                                                                                                                            |
| 54 | 1436 | 0.04 | Q39QB8     | <i>Geobacter metallireducens</i>     | NADH dehydrogenase I, L subunit                                                                                                                                                          |
| 55 | 1426 | 0.04 | B3EA87     | <i>Geobacter lovleyi</i>             | RNA polymerase sigma factor                                                                                                                                                              |
| 56 | 1402 | 0.04 | AOA1G0MAK9 | <i>Geobacteraceae bacterium</i>      | Sodium:proton exchanger                                                                                                                                                                  |
| 57 | 1347 | 0.04 | Q39U60     | <i>Geobacter metallireducens</i>     | Translation elongation factor G                                                                                                                                                          |
| 58 | 1346 | 0.04 | AOA0D5N712 | <i>Geobacter sulfurreducens</i>      | Phosphoglucomutase                                                                                                                                                                       |
| 59 | 1344 | 0.04 |            |                                      |                                                                                                                                                                                          |
| 60 | 1339 | 0.04 | Q746X3     | <i>Geobacter sulfurreducens</i>      | Bifunctional protein PutA                                                                                                                                                                |
| 61 | 1339 | 0.04 |            |                                      |                                                                                                                                                                                          |
| 62 | 1333 | 0.04 | AOA0D5N2S0 | <i>Geobacter sulfurreducens</i>      | Uncharacterized protein                                                                                                                                                                  |

|    |      |      |            |                                  |                                                                                                      |
|----|------|------|------------|----------------------------------|------------------------------------------------------------------------------------------------------|
| 63 | 1328 | 0.04 | Q39RM8     | <i>Geobacter metallireducens</i> | Glycosyltransferase                                                                                  |
| 64 | 1314 | 0.04 | A0A0A8WNV3 | <i>Geobacter sp. OR-1</i>        | Uncharacterized protein                                                                              |
| 65 | 1313 | 0.04 | Q74C76     | <i>Geobacter sulfurreducens</i>  | (R)-citramalate synthase (EC 2.3.1.182) (Citramalate synthase)                                       |
| 66 | 1306 | 0.04 | Q74FF1     | <i>Geobacter sulfurreducens</i>  | Chaperone protein ClpB                                                                               |
| 67 | 1304 | 0.04 |            |                                  |                                                                                                      |
| 68 | 1294 | 0.04 |            |                                  |                                                                                                      |
| 69 | 1290 | 0.04 | Q74AK3     | <i>Geobacter sulfurreducens</i>  | Cation-translocating P-type ATPase                                                                   |
| 70 | 1288 | 0.04 | Q39QJ8     | <i>Geobacter metallireducens</i> | Flagellar biogenesis master sigma-54-dependent transcriptional response regulator                    |
| 71 | 1266 | 0.04 | Q39ZC8     | <i>Geobacter metallireducens</i> | Ferredoxin-dependent glutamate synthase                                                              |
| 72 | 1261 | 0.04 | C6E159     | <i>Geobacter sp. (s</i>          | Uncharacterized protein                                                                              |
| 73 | 1256 | 0.04 | Q748Z4     | <i>Geobacter sulfurreducens</i>  | 30S ribosomal protein S3                                                                             |
| 74 | 1251 | 0.04 | A0A0B5BB65 | <i>Geobacter pickeringii</i>     | Uncharacterized protein                                                                              |
| 75 | 1249 | 0.04 | A0A0W8FRW6 | <i>hydrocarbon metagenome</i>    | Uncharacterized protein                                                                              |
| 76 | 1242 | 0.04 | A0A0B5BJ46 | <i>Geobacter pickeringii</i>     | Uncharacterized protein                                                                              |
| 77 | 1240 | 0.04 | A0A0B5BJ26 | <i>Geobacter pickeringii</i>     | Uncharacterized protein                                                                              |
| 78 | 1232 | 0.04 | Q74H58     | <i>Geobacter sulfurreducens</i>  | Chaperone protein DnaJ                                                                               |
| 79 | 1229 | 0.04 | Q74FM6     | <i>Geobacter sulfurreducens</i>  | Pyruvate, phosphate dikinase (EC 2.7.9.1)                                                            |
| 80 | 1225 | 0.04 | Q39YK5     | <i>Geobacter metallireducens</i> | Flagellar biogenesis protein FlhA                                                                    |
| 81 | 1218 | 0.04 | A0A0B5BH93 | <i>Geobacter pickeringii</i>     | C-and b-type cytochrome L                                                                            |
| 82 | 1212 | 0.04 | A0A0C1TL30 | <i>Geobacter soli</i>            | Flagellar basal body stator protein MotB                                                             |
| 83 | 1211 | 0.04 |            |                                  |                                                                                                      |
| 84 | 1210 | 0.04 | A0A0D5NE26 | <i>Geobacter sulfurreducens</i>  | Multidrug resistance protein B                                                                       |
| 85 | 1209 | 0.04 | A0A0D5N8I5 | <i>Geobacter sulfurreducens</i>  | Signal recognition particle protein (Fifty-four homolog)                                             |
| 86 | 1201 | 0.04 | E1QK35     | <i>Desulfarculus baarsii</i>     | Uncharacterized protein                                                                              |
| 87 | 1198 | 0.04 | Q39Y76     | <i>Geobacter metallireducens</i> | Sigma-54-dependent transcriptional response regulator                                                |
| 88 | 1195 | 0.04 | A1AM25     | <i>Pelobacter propionicus</i>    | Squalene-hopene cyclase                                                                              |
| 89 | 1191 | 0.04 | Q74H82     | <i>Geobacter sulfurreducens</i>  | Flagellar biogenesis master response receiver sensor histidine kinase, PAS and GAF domain-containing |
| 90 | 1180 | 0.04 | Q74B66     | <i>Geobacter sulfurreducens</i>  | TrfA family protein                                                                                  |
| 91 | 1179 | 0.04 | A0A0B5BDE2 | <i>Geobacter pickeringii</i>     | ATP phosphoribosyltransferase regulatory subunit                                                     |
| 92 | 1179 | 0.04 | A0A0D5ND99 | <i>Geobacter sulfurreducens</i>  | ATPase AAA                                                                                           |
| 93 | 1179 | 0.04 | A0A0D5NDJ8 | <i>Geobacter sulfurreducens</i>  | Stage II sporulation protein E                                                                       |
| 94 | 1172 | 0.04 | B9M1Q4     | <i>Geobacter daltonii</i>        | Biotin-dependent acyl-CoA carboxylase, biotin carboxylase subunit                                    |
| 95 | 1164 | 0.04 |            |                                  |                                                                                                      |
| 96 | 1161 | 0.04 | A0A0D5NE46 | <i>Geobacter sulfurreducens</i>  | Molecular chaperone DnaJ                                                                             |
| 97 | 1160 | 0.04 | A0A0D5N8E2 | <i>Geobacter sulfurreducens</i>  | ATP synthase (EC 3.6.3.14)                                                                           |

|     |      |      |            |                                      |                                                                                                                                                                                                                                                                                                                                                    |
|-----|------|------|------------|--------------------------------------|----------------------------------------------------------------------------------------------------------------------------------------------------------------------------------------------------------------------------------------------------------------------------------------------------------------------------------------------------|
| 98  | 1159 | 0.04 | A0A0B5B7H3 | <i>Geobacter pickeringii</i>         | Cytochrome C                                                                                                                                                                                                                                                                                                                                       |
| 99  | 1159 | 0.04 | Q74B89     | <i>Geobacter sulfurreducens</i>      | Uncharacterized protein                                                                                                                                                                                                                                                                                                                            |
| 100 | 1152 | 0.03 | Q39WU2     | <i>Geobacter metallireducens</i>     | Phosphate-selective outer membrane channel                                                                                                                                                                                                                                                                                                         |
| 101 | 1147 | 0.03 | A0A0C1TPB6 | <i>Geobacter soli</i>                | Nitric-oxide reductase                                                                                                                                                                                                                                                                                                                             |
| 102 | 1140 | 0.03 | Q39ZE7     | <i>Geobacter metallireducens</i>     | UvrABC system protein A (UvrA protein) (Excinuclease ABC subunit A)                                                                                                                                                                                                                                                                                |
| 103 | 1137 | 0.03 | A0A0D5N7I1 | <i>Geobacter sulfurreducens</i>      | NADH-quinone oxidoreductase subunit N (EC 1.6.5.11) (NADH dehydrogenase I subunit N) (NDH-1 subunit N)                                                                                                                                                                                                                                             |
| 104 | 1132 | 0.03 | Q74GG6     | <i>Geobacter sulfurreducens</i>      | Chromosomal replication initiator protein DnaA                                                                                                                                                                                                                                                                                                     |
| 105 | 1129 | 0.03 | B3EAB4     | <i>Geobacter lovleyi</i>             | Cytochrome c-552 (EC 1.7.2.2)                                                                                                                                                                                                                                                                                                                      |
| 106 | 1127 | 0.03 | A0A0D5N7R7 | <i>Geobacter sulfurreducens</i>      | GntR family transcriptional regulator                                                                                                                                                                                                                                                                                                              |
| 107 | 1127 | 0.03 |            |                                      |                                                                                                                                                                                                                                                                                                                                                    |
| 108 | 1122 | 0.03 | A0A0B5BK17 | <i>Geobacter pickeringii</i>         | Diguanylate cyclase                                                                                                                                                                                                                                                                                                                                |
| 109 | 1121 | 0.03 | A0A1F8XUV7 | <i>Deltaproteobacteria bacterium</i> | Uncharacterized protein                                                                                                                                                                                                                                                                                                                            |
| 110 | 1121 | 0.03 | Q747M6     | <i>Geobacter sulfurreducens</i>      | Ribonuclease G                                                                                                                                                                                                                                                                                                                                     |
| 111 | 1119 | 0.03 | A0A0A8WQV9 | <i>Geobacter sp.</i>                 | Protein TraU                                                                                                                                                                                                                                                                                                                                       |
| 112 | 1114 | 0.03 | A0A0D5N5P7 | <i>Geobacter sulfurreducens</i>      | Chemotaxis protein                                                                                                                                                                                                                                                                                                                                 |
| 113 | 1112 | 0.03 | A0A0A8WQR9 | <i>Geobacter sp.</i>                 | Helix-turn-helix domain protein                                                                                                                                                                                                                                                                                                                    |
| 114 | 1110 | 0.03 | A0A0B5BI89 | <i>Geobacter pickeringii</i>         | Type II secretion system protein                                                                                                                                                                                                                                                                                                                   |
| 115 | 1110 | 0.03 | A0LQ14     | <i>Syntrophobacter fumaroxidans</i>  | Uncharacterized protein                                                                                                                                                                                                                                                                                                                            |
| 116 | 1100 | 0.03 | A5G9A7     | <i>Geobacter uraniiireducens</i>     | NADH dehydrogenase subunit M (EC 1.6.5.3)                                                                                                                                                                                                                                                                                                          |
| 117 | 1092 | 0.03 | Q74GY0     | <i>Geobacter sulfurreducens</i>      | ATP synthase subunit beta (EC 3.6.3.14) (ATP synthase F1 sector subunit beta) (F-ATPase subunit beta)                                                                                                                                                                                                                                              |
| 118 | 1086 | 0.03 | B5EFV6     | <i>Geobacter bemidjiensis</i>        | Bifunctional protein PutA                                                                                                                                                                                                                                                                                                                          |
| 119 | 1081 | 0.03 | A0A0B5BD43 | <i>Geobacter pickeringii</i>         | ABC transporter permease                                                                                                                                                                                                                                                                                                                           |
| 120 | 1081 | 0.03 | Q74FW2     | <i>Geobacter sulfurreducens</i>      | Succinyl:acetate coenzyme A transferase                                                                                                                                                                                                                                                                                                            |
| 121 | 1075 | 0.03 | A0A0B5BHV9 | <i>Geobacter pickeringii</i>         | ATPase AAA                                                                                                                                                                                                                                                                                                                                         |
| 122 | 1068 | 0.03 | A0A0D5N7M4 | <i>Geobacter sulfurreducens</i>      | Chemotaxis protein                                                                                                                                                                                                                                                                                                                                 |
| 123 | 1062 | 0.03 | Q39ZK4     | <i>Geobacter metallireducens</i>     | Bifunctional glutamine synthetase adenylyltransferase/adenylyl-removing enzyme (ATP:glutamine synthetase adenylyltransferase) (ATase) [Includes: Glutamine synthetase adenylyl-L-tyrosine phosphorylase (EC 2.7.7.89) (Adenylyl removase) (AR) (AT-N); Glutamine synthetase adenylyl transferase (EC 2.7.7.42) (Adenylyl transferase) (AT) (AT-C)] |
| 124 | 1059 | 0.03 | A0A0B5B8A8 | <i>Geobacter pickeringii</i>         | Valine--tRNA ligase (EC 6.1.1.9) (Valyl-tRNA synthetase) (ValRS)                                                                                                                                                                                                                                                                                   |
| 125 | 1058 | 0.03 | B3E9R4     | <i>Geobacter lovleyi</i>             | Isocitrate dehydrogenase, NADP-dependent (EC 1.1.1.42)                                                                                                                                                                                                                                                                                             |
| 126 | 1055 | 0.03 | A0A0B5BCL9 | <i>Geobacter pickeringii</i>         | Uncharacterized protein                                                                                                                                                                                                                                                                                                                            |



|     |      |      |            |                                     |                                                                                                                                                                                                                                                            |
|-----|------|------|------------|-------------------------------------|------------------------------------------------------------------------------------------------------------------------------------------------------------------------------------------------------------------------------------------------------------|
| 127 | 1054 | 0.03 | Q74GY2     | <i>Geobacter sulfurreducens</i>     | ATP synthase subunit alpha (EC 3.6.3.14) (ATP synthase F1 sector subunit alpha) (F-ATPase subunit alpha)                                                                                                                                                   |
| 128 | 1050 | 0.03 | Q74FD5     | <i>Geobacter sulfurreducens</i>     | Hydroxylamine reductase (EC 1.7.99.1) (Hybrid-cluster protein) (HCP) (Prismane protein)                                                                                                                                                                    |
| 129 | 1047 | 0.03 | Q39QJ5     | <i>Geobacter metallireducens</i>    | Sensor histidine kinase CheA associated with MCPs of classes 40H and 40+24H                                                                                                                                                                                |
| 130 | 1043 | 0.03 |            |                                     |                                                                                                                                                                                                                                                            |
| 131 | 1038 | 0.03 | AOA0A8WPS5 | <i>Geobacter sp.</i>                | Efflux pump membrane transporter                                                                                                                                                                                                                           |
| 132 | 1035 | 0.03 | A5GB28     | <i>Geobacter uraniireducens</i>     | Plasmid maintenance system antidote protein, XRE family                                                                                                                                                                                                    |
| 133 | 1033 | 0.03 | Q39QU2     | <i>Geobacter metallireducens</i>    | Phosphoenolpyruvate carboxykinase (ATP) (PCK) (PEP carboxykinase) (PEPCK) (EC 4.1.1.49)                                                                                                                                                                    |
| 134 | 1032 | 0.03 | AOA0A8WN28 | <i>Geobacter sp.</i>                | Protein TraN                                                                                                                                                                                                                                               |
| 135 | 1028 | 0.03 | AOA1T4LST4 | <i>Geobacter thiogenes</i>          | Multidrug efflux pump subunit AcrB                                                                                                                                                                                                                         |
| 136 | 1025 | 0.03 | AOA1F9PMW1 | <i>Desulfuromonadales bacterium</i> | DNA-directed RNA polymerase subunit beta (RNAP subunit beta) (EC 2.7.7.6) (RNA polymerase subunit beta) (Transcriptase subunit beta)                                                                                                                       |
| 137 | 1025 | 0.03 | Q39QP7     | <i>Geobacter metallireducens</i>    | Lon protease (EC 3.4.21.53) (ATP-dependent protease La)                                                                                                                                                                                                    |
| 138 | 1022 | 0.03 | D4H382     | <i>Denitrovibrio acetiphilus</i>    | DNA-directed RNA polymerase subunit beta' (RNAP subunit beta') (EC 2.7.7.6) (RNA polymerase subunit beta') (Transcriptase subunit beta')                                                                                                                   |
| 139 | 1019 | 0.03 | A5GDX4     | <i>Geobacter uraniireducens</i>     | DNA gyrase subunit B (EC 5.99.1.3)                                                                                                                                                                                                                         |
| 140 | 1018 | 0.03 | AOA0B5BK56 | <i>Geobacter pickeringii</i>        | Lon protease (EC 3.4.21.53) (ATP-dependent protease La)                                                                                                                                                                                                    |
| 141 | 1018 | 0.03 | D4H381     | <i>Denitrovibrio acetiphilus</i>    | DNA-directed RNA polymerase subunit beta (RNAP subunit beta) (EC 2.7.7.6) (RNA polymerase subunit beta) (Transcriptase subunit beta)                                                                                                                       |
| 142 | 1017 | 0.03 | Q39Q36     | <i>Geobacter metallireducens</i>    | Heterodisulfide oxidoreductase, FAD-binding and iron-sulfur cluster-binding subunit A                                                                                                                                                                      |
| 143 | 1014 | 0.03 | AOA0D5N8Q2 | <i>Geobacter sulfurreducens</i>     | Uncharacterized protein                                                                                                                                                                                                                                    |
| 144 | 1009 | 0.03 | A5GFJ7     | <i>Geobacter sulfurreducens</i>     | Erythronolide synthase (EC 2.3.1.94)                                                                                                                                                                                                                       |
| 145 | 997  | 0.03 | A5GCN0     | <i>Geobacter sulfurreducens</i>     | Short chain amide porin                                                                                                                                                                                                                                    |
| 146 | 984  | 0.03 | AOA4W3     | <i>Geobacter sulfurreducens</i>     | Biosynthetic arginine decarboxylase (ADC) (EC 4.1.1.19)                                                                                                                                                                                                    |
| 147 | 977  | 0.03 | AOA0D5N8X4 | <i>Geobacter sulfurreducens</i>     | Flagellar M-ring protein                                                                                                                                                                                                                                   |
| 148 | 976  | 0.03 | Q39PS2     | <i>Geobacter metallireducens</i>    | Transcription-repair-coupling factor (TRCF) (EC 3.6.4.-)                                                                                                                                                                                                   |
| 149 | 976  | 0.03 | Q39ZH1     | <i>Geobacter metallireducens</i>    | Glutamine--fructose-6-phosphate aminotransferase [isomerizing] (EC 2.6.1.16) (D-fructose-6-phosphate amidotransferase) (GFAT) (Glucosamine-6-phosphate synthase) (Hexosephosphate aminotransferase) (L-glutamine--D-fructose-6-phosphate amidotransferase) |
| 150 | 974  | 0.03 | AOA0B5BIQ7 | <i>Geobacter pickeringii</i>        | Flagellar basal-body rod protein FlgF (Flagellar hook protein FlgE)                                                                                                                                                                                        |
| 151 | 974  | 0.03 | A5GAY2     | <i>Geobacter uraniireducens</i>     | DNA-directed RNA polymerase subunit beta' (RNAP subunit beta') (EC 2.7.7.6) (RNA polymerase subunit beta') (Transcriptase subunit beta')                                                                                                                   |
| 152 | 972  | 0.03 | AOA0B5BIS9 | <i>Geobacter pickeringii</i>        | Multidrug transporter AcrB                                                                                                                                                                                                                                 |
| 153 | 969  | 0.03 |            |                                     |                                                                                                                                                                                                                                                            |
| 154 | 960  | 0.03 | Q39T74     | <i>Geobacter metallireducens</i>    | GTP/GDP 3'-pyrophosphokinase and (P)ppGpp 3'-pyrophosphohydrolase                                                                                                                                                                                          |

|     |     |      |            |                                  |                                                                                                                                                                                                                                                                                                                          |
|-----|-----|------|------------|----------------------------------|--------------------------------------------------------------------------------------------------------------------------------------------------------------------------------------------------------------------------------------------------------------------------------------------------------------------------|
| 155 | 960 | 0.03 | A5GAY1     | <i>Geobacter uraniireducens</i>  | DNA-directed RNA polymerase subunit beta (RNAP subunit beta) (EC 2.7.7.6) (RNA polymerase subunit beta) (Transcriptase subunit beta)                                                                                                                                                                                     |
| 156 | 958 | 0.03 | A0A1T4RQ7  | <i>Geobacter thiogenes</i>       | NAD+---dinitrogen-reductase ADP-D-ribosyltransferase                                                                                                                                                                                                                                                                     |
| 157 | 958 | 0.03 | Q39QA3     | <i>Geobacter metallireducens</i> | ATP synthase subunit a (ATP synthase F0 sector subunit a) (F-ATPase subunit 6)                                                                                                                                                                                                                                           |
| 158 | 957 | 0.03 | A0A0D5N952 | <i>Geobacter sulfurreducens</i>  | Flagellar motor switch protein FlIG                                                                                                                                                                                                                                                                                      |
| 159 | 957 | 0.03 | P61679     | <i>Geobacter sulfurreducens</i>  | UDP-N-acetylmuramate--L-alanine ligase (EC 6.3.2.8) (UDP-N-acetylmuramoyl-L-alanine synthetase)                                                                                                                                                                                                                          |
| 160 | 956 | 0.03 | A0A0D5N8G6 | <i>Geobacter sulfurreducens</i>  | Cation transporter                                                                                                                                                                                                                                                                                                       |
| 161 | 953 | 0.03 | Q39R25     | <i>Geobacter metallireducens</i> | Sensor diguanylate cyclase/phosphodiesterase, PAS, PAS and PAS domain-containing                                                                                                                                                                                                                                         |
| 162 | 952 | 0.03 | A0A0D5NAK5 | <i>Geobacter sulfurreducens</i>  | Bifunctional uridylyltransferase/uridylyl-removing enzyme (UTase/UR) (Bifunctional [protein-PII] modification enzyme) (Bifunctional nitrogen sensor protein) [Includes: [Protein-PII]-UMP uridylyl-removing enzyme (UR) (EC 3.1.4.-); [Protein-PII] uridylyltransferase (PII uridylyltransferase) (UTase) (EC 2.7.7.59)] |
| 163 | 950 | 0.03 |            |                                  |                                                                                                                                                                                                                                                                                                                          |
| 164 | 947 | 0.03 | A0A0B5BE38 | <i>Geobacter pickeringii</i>     | Transcription-repair-coupling factor (TRCF) (EC 3.6.4.-)                                                                                                                                                                                                                                                                 |
| 165 | 946 | 0.03 | Q74B81     | <i>Geobacter sulfurreducens</i>  | Uncharacterized protein                                                                                                                                                                                                                                                                                                  |
| 166 | 945 | 0.03 | Q747G2     | <i>Geobacter sulfurreducens</i>  | Outer membrane channel OmpJ                                                                                                                                                                                                                                                                                              |
| 167 | 942 | 0.03 | Q39QT7     | <i>Geobacter metallireducens</i> | Cytochrome c                                                                                                                                                                                                                                                                                                             |
| 168 | 941 | 0.03 | A0A0A8WMX3 | <i>Geobacter sp.</i>             | Type III restriction enzyme, res subunit                                                                                                                                                                                                                                                                                 |
| 169 | 939 | 0.03 | A0A0D5NCW1 | <i>Geobacter sulfurreducens</i>  | Histidine kinase                                                                                                                                                                                                                                                                                                         |
| 170 | 932 | 0.03 | A0A0B5BH05 | <i>Geobacter pickeringii</i>     | Malic enzyme (EC 1.1.1.40)                                                                                                                                                                                                                                                                                               |
| 171 | 929 | 0.03 | A0A0B5BIF0 | <i>Geobacter pickeringii</i>     | NADH-ubiquinone oxidoreductase subunit 3                                                                                                                                                                                                                                                                                 |
| 172 | 929 | 0.03 | Q39RL8     | <i>Geobacter metallireducens</i> | Undecaprenyl-diphospho-oligosaccharide flippase                                                                                                                                                                                                                                                                          |
| 173 | 925 | 0.03 | A0A0D5NCN6 | <i>Geobacter sulfurreducens</i>  | Thiol:disulfide interchange protein                                                                                                                                                                                                                                                                                      |
| 174 | 922 | 0.03 | A0A0D5NDD6 | <i>Geobacter sulfurreducens</i>  | Type II secretion system protein E                                                                                                                                                                                                                                                                                       |
| 175 | 918 | 0.03 | A0A0D5ND20 | <i>Geobacter sulfurreducens</i>  | Amino acid dehydrogenase                                                                                                                                                                                                                                                                                                 |
| 176 | 913 | 0.03 | A0A0B5B5Z5 | <i>Geobacter pickeringii</i>     | DNA polymerase III subunit beta (EC 2.7.7.7)                                                                                                                                                                                                                                                                             |
| 177 | 913 | 0.03 | Q39QK7     | <i>Geobacter metallireducens</i> | Outer membrane channel OmpJ                                                                                                                                                                                                                                                                                              |
| 178 | 911 | 0.03 | A0A0B5BDE7 | <i>Geobacter pickeringii</i>     | Fis family transcriptional regulator                                                                                                                                                                                                                                                                                     |
| 179 | 905 | 0.03 | A0A0B5BDG1 | <i>Geobacter pickeringii</i>     | tRNA uridine 5-carboxymethylaminomethyl modification enzyme MnmG (Glucose-inhibited division protein A)                                                                                                                                                                                                                  |
| 180 | 904 | 0.03 | Q39QD0     | <i>Geobacter metallireducens</i> | Periplasmically oriented, membrane-bound [NiFe]-hydrogenase, large subunit                                                                                                                                                                                                                                               |
| 181 | 900 | 0.03 | Q748I6     | <i>Geobacter sulfurreducens</i>  | Metalloprotease domain protein, M6 family                                                                                                                                                                                                                                                                                |
| 182 | 897 | 0.03 | A0A0B5BKE7 | <i>Geobacter pickeringii</i>     | NADH-quinone oxidoreductase subunit N (EC 1.6.5.11) (NADH dehydrogenase I subunit N) (NDH-1 subunit N)                                                                                                                                                                                                                   |

|     |     |      |            |                                  |                                                                                                             |
|-----|-----|------|------------|----------------------------------|-------------------------------------------------------------------------------------------------------------|
| 183 | 895 | 0.03 | Q74GT3     | <i>Geobacter sulfurreducens</i>  | LL-diaminopimelate aminotransferase (DAP-AT) (DAP-aminotransferase) (LL-DAP-aminotransferase) (EC 2.6.1.83) |
| 184 | 894 | 0.03 | Q39QB3     | <i>Geobacter metallireducens</i> | NADH dehydrogenase I, G subunit                                                                             |
| 185 | 889 | 0.03 | A0A0A8WNZ4 | <i>Geobacter sp.</i>             | DNA gyrase subunit A (EC 5.99.1.3)                                                                          |
| 186 | 889 | 0.03 | B5EGM4     | <i>Geobacter bemidjensis</i>     | Glycerol/1,2-propanediol dehydratase                                                                        |
| 187 | 887 | 0.03 | A0R7X1     | <i>Pelobacter propionicus</i>    | Type III restriction enzyme, res subunit                                                                    |
| 188 | 882 | 0.03 | Q749N5     | <i>Geobacter sulfurreducens</i>  | Acetate kinase (EC 2.7.2.1) (Acetokinase)                                                                   |
| 189 | 879 | 0.03 | Q39UR9     | <i>Geobacter metallireducens</i> | Carbamoyl-phosphate synthase large chain (EC 6.3.5.5) (Carbamoyl-phosphate synthetase ammonia chain)        |
| 190 | 877 | 0.03 | A0A0D5N3I5 | <i>Geobacter sulfurreducens</i>  | Uncharacterized protein                                                                                     |
| 191 | 877 | 0.03 | Q74C83     | <i>Geobacter sulfurreducens</i>  | ATP-dependent Clp protease ATP-binding subunit ClpX                                                         |
| 192 | 875 | 0.03 | A0A0D5N400 | <i>Geobacter sulfurreducens</i>  | Uncharacterized protein                                                                                     |
| 193 | 874 | 0.03 | A0A0D5N6Q1 | <i>Geobacter sulfurreducens</i>  | FeS-binding protein                                                                                         |
| 194 | 870 | 0.03 | I7EF12     | <i>Geobacter sulfurreducens</i>  | Uncharacterized protein                                                                                     |
| 195 | 869 | 0.03 | A0A0B5BK89 | <i>Geobacter pickeringii</i>     | FAD-binding protein                                                                                         |
| 196 | 868 | 0.03 | B3EA93     | <i>Geobacter lovleyi</i>         | 2-alkenal reductase (EC 1.3.1.74)                                                                           |
| 197 | 867 | 0.03 | Q39SJ2     | <i>Geobacter metallireducens</i> | Nitrogen fixation master sigma-54-dependent transcriptional response regulator                              |
| 198 | 866 | 0.03 | A0A0A8WQW8 | <i>Geobacter sp.</i>             | Protein TraE                                                                                                |
| 199 | 866 | 0.03 |            |                                  |                                                                                                             |
| 200 | 861 | 0.03 | Q39V52     | <i>Geobacter metallireducens</i> | GAF sensor methyl-accepting chemotaxis sensory transducer, class 40H                                        |
| 201 | 858 | 0.03 | A0A0B5B668 | <i>Geobacter pickeringii</i>     | Peptidase U32                                                                                               |
| 202 | 858 | 0.03 | A0A1T4R5F2 | <i>Geobacter thiogenes</i>       | Putative transposase                                                                                        |
| 203 | 858 | 0.03 | Q39XL9     | <i>Geobacter metallireducens</i> | Sensor sigma-54-dependent transcriptional regulator, GAF and GAF domain-containing                          |
| 204 | 850 | 0.03 |            |                                  |                                                                                                             |
| 205 | 848 | 0.03 | A0A0B5BJV3 | <i>Geobacter pickeringii</i>     | ABC transporter substrate-binding protein                                                                   |
| 206 | 848 | 0.03 | Q39RI3     | <i>Geobacter metallireducens</i> | Sensor histidine kinase, HAMP domain-containing, 2 heme-binding sites                                       |
| 207 | 840 | 0.03 | Q74CR5     | <i>Geobacter sulfurreducens</i>  | Serine hydroxymethyltransferase (SHMT) (Serine methylase) (EC 2.1.2.1)                                      |
| 208 | 840 | 0.03 | Q39X91     | <i>Geobacter metallireducens</i> | DNA topoisomerase 1 (EC 5.99.1.2) (DNA topoisomerase I)                                                     |
| 209 | 840 | 0.03 | Q39X99     | <i>Geobacter metallireducens</i> | UDP-glucuronate 4-dehydrogenase, decarboxylating                                                            |
| 210 | 839 | 0.03 | Q74C70     | <i>Geobacter sulfurreducens</i>  | Phosphoglucosamine mutase (EC 5.4.2.10)                                                                     |
| 211 | 838 | 0.03 | Q39QY3     | <i>Geobacter metallireducens</i> | Efflux pump, RND family, inner membrane protein                                                             |
| 212 | 837 | 0.03 | A5GF11     | <i>Geobacter uraniireducens</i>  | Acetyl-CoA carboxylase carboxyltransferase subunit alpha (EC 6.3.4.14)                                      |
| 213 | 837 | 0.03 | Q39U54     | <i>Geobacter metallireducens</i> | Sensor histidine kinase cyclic nucleotide phosphodiesterase, GAF, GAF and HD-GYP-related domain-containing  |
| 214 | 837 | 0.03 | Q74B83     | <i>Geobacter sulfurreducens</i>  | ATPase, AAA family, CbbQ_C domain-containing                                                                |
| 215 | 836 | 0.03 | A0A0B5BJ17 | <i>Geobacter pickeringii</i>     | UvrABC system protein C (Protein UvrC) (Excinuclease ABC subunit C)                                         |

|     |     |      |            |                                     |                                                                                                                                          |
|-----|-----|------|------------|-------------------------------------|------------------------------------------------------------------------------------------------------------------------------------------|
| 216 | 835 | 0.03 | Q39VY8     | <i>Geobacter metallireducens</i>    | Glutamine synthetase (EC 6.3.1.2)                                                                                                        |
| 217 | 833 | 0.03 | A0A0B5BK21 | <i>Geobacter pickeringii</i>        | Inner membrane cytochrome H                                                                                                              |
| 218 | 833 | 0.03 | A0A0D5N949 | <i>Geobacter sulfurreducens</i>     | Response regulator                                                                                                                       |
| 219 | 832 | 0.03 | A0A0B5BAC1 | <i>Geobacter pickeringii</i>        | Dihydrolipoyl dehydrogenase (EC 1.8.1.4)                                                                                                 |
| 220 | 831 | 0.03 | B9M474     | <i>Geobacter daltonii</i>           | Uncharacterized protein                                                                                                                  |
| 221 | 830 | 0.03 | A5GC25     | <i>Geobacter uraniireducens</i>     | Propionyl-CoA carboxylase (EC 6.4.1.3)                                                                                                   |
| 222 | 829 | 0.03 | A0A0B5BC52 | <i>Geobacter pickeringii</i>        | General secretion pathway protein GspD                                                                                                   |
| 223 | 821 | 0.02 | Q39VY0     | <i>Geobacter metallireducens</i>    | Malate dehydrogenase (EC 1.1.1.37)                                                                                                       |
| 224 | 821 | 0.02 | Q74GF2     | <i>Geobacter sulfurreducens</i>     | Metal-dependent phosphohydrolase, HDOD domain-containing                                                                                 |
| 225 | 816 | 0.02 | A0A0D5NB12 | <i>Geobacter sulfurreducens</i>     | Aldehyde dehydrogenase                                                                                                                   |
| 226 | 815 | 0.02 | A0A0A8WV23 | <i>Geobacter sp.</i>                | Protein translocase subunit SecD                                                                                                         |
| 227 | 814 | 0.02 | A1ANK6     | <i>Pelobacter propionicus</i>       | Peptidase C1A, papain                                                                                                                    |
| 228 | 813 | 0.02 |            |                                     |                                                                                                                                          |
| 229 | 808 | 0.02 | Q39RM6     | <i>Geobacter metallireducens</i>    | Glycosyltransferase                                                                                                                      |
| 230 | 808 | 0.02 | A1ALT5     | <i>Pelobacter propionicus</i>       | DNA-directed RNA polymerase subunit beta' (RNAP subunit beta') (EC 2.7.7.6) (RNA polymerase subunit beta') (Transcriptase subunit beta') |
| 231 | 806 | 0.02 | Q74H61     | <i>Geobacter sulfurreducens</i>     | Heat-inducible transcription repressor HrcA                                                                                              |
| 232 | 804 | 0.02 | A0A0B5BH19 | <i>Geobacter pickeringii</i>        | Uncharacterized protein                                                                                                                  |
| 233 | 803 | 0.02 | P61667     | <i>Geobacter sulfurreducens</i>     | DNA mismatch repair protein MutS                                                                                                         |
| 234 | 802 | 0.02 | A0A0B5BC86 | <i>Geobacter pickeringii</i>        | Multicopper oxidase                                                                                                                      |
| 235 | 799 | 0.02 | B9M5J7     | <i>Geobacter daltonii</i>           | CRISPR-associated protein Csd2                                                                                                           |
| 236 | 798 | 0.02 | Q39UW3     | <i>Geobacter metallireducens</i>    | Succinyl:acetate coenzyme A transferase                                                                                                  |
| 237 | 796 | 0.02 | Q39Q79     | <i>Geobacter metallireducens</i>    | Winged-helix transcriptional response regulator                                                                                          |
| 238 | 795 | 0.02 | Q39ZL2     | <i>Geobacter metallireducens</i>    | TrkA domain protein                                                                                                                      |
| 239 | 791 | 0.02 | Q747G4     | <i>Geobacter sulfurreducens</i>     | (R)-methylmalonyl-CoA mutase, isobutyryl-CoA mutase-like catalytic subunit                                                               |
| 240 | 790 | 0.02 | P60401     | <i>Geobacter sulfurreducens</i>     | 50S ribosomal protein L2                                                                                                                 |
| 241 | 789 | 0.02 | A0A0B5BIH3 | <i>Geobacter pickeringii</i>        | Uncharacterized protein                                                                                                                  |
| 242 | 789 | 0.02 | N8ZVC9     | <i>Acinetobacter gernerii</i>       | Uncharacterized protein                                                                                                                  |
| 243 | 789 | 0.02 | Q39YH3     | <i>Geobacter metallireducens</i>    | UDP-N-acetylglucosamine 4,6-dehydratase and UDP-2-acetamido-2,6-dideoxy-alpha-D-xylo-4-hexulose 5-epimerase                              |
| 244 | 788 | 0.02 | A0A0B5BCZ8 | <i>Geobacter pickeringii</i>        | Succinate dehydrogenase (EC 1.3.5.1)                                                                                                     |
| 245 | 788 | 0.02 | A0A1F9PX11 | <i>Desulfuromonadales bacterium</i> | Cytosine-specific methyltransferase (EC 2.1.1.37)                                                                                        |
| 246 | 787 | 0.02 | B0L930     | <i>uncultured Geobacter sp.</i>     | Tuf (Fragment)                                                                                                                           |
| 247 | 787 | 0.02 | Q39Z79     | <i>Geobacter metallireducens</i>    | Twitching motility pilus retraction ATPase                                                                                               |
| 248 | 785 | 0.02 | A0A0D5N732 | <i>Geobacter sulfurreducens</i>     | Transcription-repair-coupling factor (TRCF) (EC 3.6.4.-)                                                                                 |

|     |     |      |            |                                  |                                                                                                                                                                                                                                    |
|-----|-----|------|------------|----------------------------------|------------------------------------------------------------------------------------------------------------------------------------------------------------------------------------------------------------------------------------|
| 249 | 785 | 0.02 | Q39W73     | <i>Geobacter metallireducens</i> | 2-isopropylmalate synthase (EC 2.3.3.13) (Alpha-IPM synthase) (Alpha-isopropylmalate synthase)                                                                                                                                     |
| 250 | 783 | 0.02 | A0A0B5BB89 | <i>Geobacter pickeringii</i>     | Chromosome partition protein Smc                                                                                                                                                                                                   |
| 251 | 781 | 0.02 | A0A0A8WLL1 | <i>Geobacter sp.</i>             | Uncharacterized protein                                                                                                                                                                                                            |
| 252 | 781 | 0.02 | Q39ZQ2     | <i>Geobacter metallireducens</i> | Uncharacterized protein                                                                                                                                                                                                            |
| 253 | 775 | 0.02 | A0A0B5BBC9 | <i>Geobacter pickeringii</i>     | Type I citrate synthase (EC 2.3.3.1)                                                                                                                                                                                               |
| 254 | 775 | 0.02 | A0A0D5NAW4 | <i>Geobacter sulfurreducens</i>  | Cation transporter                                                                                                                                                                                                                 |
| 255 | 773 | 0.02 |            |                                  |                                                                                                                                                                                                                                    |
| 256 | 772 | 0.02 | A0A0D5N7Y6 | <i>Geobacter sulfurreducens</i>  | Chemotaxis protein CheA                                                                                                                                                                                                            |
| 257 | 767 | 0.02 | Q747K3     | <i>Geobacter sulfurreducens</i>  | UvrABC system protein B (Protein UvrB) (Excinuclease ABC subunit B)                                                                                                                                                                |
| 258 | 766 | 0.02 | A0A0A8WRD3 | <i>Geobacter sp.</i>             | Putative ABC transporter ATP-binding protein YkpA                                                                                                                                                                                  |
| 259 | 766 | 0.02 | A0A0D5NAV3 | <i>Geobacter sulfurreducens</i>  | Peptidase S41                                                                                                                                                                                                                      |
| 260 | 765 | 0.02 | B5E7W0     | <i>Geobacter bemidjensis</i>     | Lipoprotein, putative                                                                                                                                                                                                              |
| 261 | 765 | 0.02 | Q74B64     | <i>Geobacter sulfurreducens</i>  | RNA polymerase sigma factor                                                                                                                                                                                                        |
| 262 | 764 | 0.02 | A0A0B5BJT6 | <i>Geobacter pickeringii</i>     | Membrane protein insertase YidC (Foldase YidC) (Membrane integrase YidC) (Membrane protein YidC)                                                                                                                                   |
| 263 | 763 | 0.02 | A0A0D5N7N0 | <i>Geobacter sulfurreducens</i>  | Glutamate synthase                                                                                                                                                                                                                 |
| 264 | 763 | 0.02 | Q39S15     | <i>Geobacter metallireducens</i> | Fumarate hydratase class I (EC 4.2.1.2)                                                                                                                                                                                            |
| 265 | 763 | 0.02 | Q39WG2     | <i>Geobacter metallireducens</i> | Chromosome partition protein Smc                                                                                                                                                                                                   |
| 266 | 760 | 0.02 | Q39RM7     | <i>Geobacter metallireducens</i> | Glycosyltransferase                                                                                                                                                                                                                |
| 267 | 759 | 0.02 | A0A0A8WYA5 | <i>Geobacter sp.</i>             | DNA-directed RNA polymerase subunit beta' (RNAP subunit beta') (EC 2.7.7.6) (RNA polymerase subunit beta') (Transcriptase subunit beta')                                                                                           |
| 268 | 759 | 0.02 | A0A0B5BGY7 | <i>Geobacter pickeringii</i>     | Phosphoglucomutase                                                                                                                                                                                                                 |
| 269 | 759 | 0.02 | Q74B87     | <i>Geobacter sulfurreducens</i>  | Uncharacterized protein                                                                                                                                                                                                            |
| 270 | 757 | 0.02 | P60789     | <i>Geobacter sulfurreducens</i>  | Elongation factor 4 (EF-4) (EC 3.6.5.n1) (Ribosomal back-translocase LepA)                                                                                                                                                         |
| 271 | 756 | 0.02 | A0A0B5BG19 | <i>Geobacter pickeringii</i>     | Lon protease (EC 3.4.21.53) (ATP-dependent protease La)                                                                                                                                                                            |
| 272 | 756 | 0.02 | A0A0C1TQJ7 | <i>Geobacter soli</i>            | Uncharacterized protein                                                                                                                                                                                                            |
| 273 | 750 | 0.02 | A1AN79     | <i>Pelobacter propionicus</i>    | Adenosylmethionine-8-amino-7-oxononanoate aminotransferase (EC 2.6.1.62) (7,8-diamino-pelargonic acid aminotransferase) (DAPA AT) (DAPA aminotransferase) (7,8-diaminononanoate synthase) (DANS) (Diaminopelargonic acid synthase) |
| 274 | 750 | 0.02 | B3EA94     | <i>Geobacter lovleyi</i>         | Uncharacterized protein                                                                                                                                                                                                            |
| 275 | 747 | 0.02 | A0A0C1QTJ3 | <i>Geobacter soli</i>            | Hemolysin D                                                                                                                                                                                                                        |
| 276 | 744 | 0.02 | A0A0B5BGU8 | <i>Geobacter pickeringii</i>     | Chemotaxis protein                                                                                                                                                                                                                 |
| 277 | 744 | 0.02 | Q74H55     | <i>Geobacter sulfurreducens</i>  | Serine--tRNA ligase (EC 6.1.1.11) (Seryl-tRNA synthetase) (SerRS) (Seryl-tRNA(Ser/Sec) synthetase)                                                                                                                                 |
| 278 | 743 | 0.02 | Q747L0     | <i>Geobacter sulfurreducens</i>  | Glycoside hydrolase, family 57                                                                                                                                                                                                     |

|     |     |      |            |                                     |                                                                                                            |
|-----|-----|------|------------|-------------------------------------|------------------------------------------------------------------------------------------------------------|
| 279 | 742 | 0.02 | A0A0B5BGV8 | <i>Geobacter pickeringii</i>        | Zinc protease                                                                                              |
| 280 | 742 | 0.02 | A0A0B5BIW8 | <i>Geobacter pickeringii</i>        | Aminotransferase                                                                                           |
| 281 | 742 | 0.02 | A0A0D5N848 | <i>Geobacter sulfurreducens</i>     | Chemotaxis protein methyltransferase (EC 2.1.1.80)                                                         |
| 282 | 742 | 0.02 | Q39X64     | <i>Geobacter metallireducens</i>    | Cell shape-determining protein MreB                                                                        |
| 283 | 740 | 0.02 | A0A0B5B8F2 | <i>Geobacter pickeringii</i>        | Sodium transporter                                                                                         |
| 284 | 740 | 0.02 |            |                                     |                                                                                                            |
| 285 | 739 | 0.02 | A0A0B5BKQ2 | <i>Geobacter pickeringii</i>        | Branched-chain amino acid ABC transporter substrate-binding protein                                        |
| 286 | 739 | 0.02 | Q39QK5     | <i>Geobacter metallireducens</i>    | Uncharacterized protein                                                                                    |
| 287 | 736 | 0.02 | A0A0B5B672 | <i>Geobacter pickeringii</i>        | FeS-binding protein                                                                                        |
| 288 | 736 | 0.02 | A0A0B5B6P6 | <i>Geobacter pickeringii</i>        | Histidine kinase                                                                                           |
| 289 | 736 | 0.02 | B3EAA0     | <i>Geobacter lovleyi</i>            | Uncharacterized protein                                                                                    |
| 290 | 735 | 0.02 | Q74BT7     | <i>Geobacter sulfurreducens</i>     | Sensor histidine kinase cyclic nucleotide phosphodiesterase, GAF, GAF and HD-GYP-related domain-containing |
| 291 | 735 | 0.02 | Q74F57     | <i>Geobacter sulfurreducens</i>     | Membrane protein, major facilitator superfamily                                                            |
| 292 | 734 | 0.02 | Q39WR2     | <i>Geobacter metallireducens</i>    | CRISPR-associated endonuclease Cas1 (EC 3.1.-.-)                                                           |
| 293 | 730 | 0.02 | A5GFJ6     | <i>Geobacter uraniireducens</i>     | Beta-hydroxyacyl-(Acyl-carrier-protein) dehydratase, FabA/FabZ                                             |
| 294 | 728 | 0.02 | A0A0C1U608 | <i>Geobacter soli</i>               | Chemotaxis protein                                                                                         |
| 295 | 725 | 0.02 | Q39Y18     | <i>Geobacter metallireducens</i>    | Transcription termination/antitermination protein NusG                                                     |
| 296 | 724 | 0.02 | Q39UA2     | <i>Geobacter metallireducens</i>    | Adenylosuccinate lyase (ASL) (EC 4.3.2.2) (Adenylosuccinase)                                               |
| 297 | 723 | 0.02 | A0A0B5BE21 | <i>Geobacter pickeringii</i>        | Histidine kinase                                                                                           |
| 298 | 723 | 0.02 | Q39PY9     | <i>Geobacter metallireducens</i>    | Histidine kinase (EC 2.7.13.3)                                                                             |
| 299 | 719 | 0.02 | A0A1F9P4Q4 | <i>Desulfuromonadales bacterium</i> | Uncharacterized protein                                                                                    |
| 300 | 719 | 0.02 | A0A1G0MT57 | <i>Geobacteraceae bacterium</i>     | Uncharacterized protein                                                                                    |
| 301 | 717 | 0.02 | A0A0D5N8K2 | <i>Geobacter sulfurreducens</i>     | RND transporter                                                                                            |
| 302 | 717 | 0.02 | B3EB59     | <i>Geobacter lovleyi</i>            | Uncharacterized protein                                                                                    |
| 303 | 716 | 0.02 | A0A0D5N5Y8 | <i>Geobacter sulfurreducens</i>     | Cell division protein FtsA                                                                                 |
| 304 | 716 | 0.02 | A0A0D5N8X6 | <i>Geobacter sulfurreducens</i>     | Chemotaxis protein                                                                                         |
| 305 | 715 | 0.02 | A0A0D5N627 | <i>Geobacter sulfurreducens</i>     | SpoVR family protein                                                                                       |
| 306 | 714 | 0.02 | A0A0D5N4E2 | <i>Geobacter sulfurreducens</i>     | Conjugal transfer protein TraB                                                                             |
| 307 | 713 | 0.02 | A5GDX5     | <i>Geobacter uraniireducens</i>     | DNA gyrase subunit A (EC 5.99.1.3)                                                                         |
| 308 | 710 | 0.02 | Q39WW8     | <i>Geobacter metallireducens</i>    | Periplasmic serine endoprotease DegP-like (EC 3.4.21.107)                                                  |
| 309 | 709 | 0.02 | A0A0B5BCB2 | <i>Geobacter pickeringii</i>        | Nitrogen fixation protein NifE                                                                             |
| 310 | 708 | 0.02 | Q74GU4     | <i>Geobacter sulfurreducens</i>     | Acetylglutamate kinase (EC 2.7.2.8) (N-acetyl-L-glutamate 5-phosphotransferase) (NAG kinase) (NAGK)        |
| 311 | 707 | 0.02 | A0A0B5B9H5 | <i>Geobacter pickeringii</i>        | Uncharacterized protein                                                                                    |

|     |     |      |            |                                  |                                                                                                                                                                                          |
|-----|-----|------|------------|----------------------------------|------------------------------------------------------------------------------------------------------------------------------------------------------------------------------------------|
| 312 | 707 | 0.02 | A5GC26     | <i>Geobacter uraniireducens</i>  | Biotin/lipoyl attachment domain-containing protein                                                                                                                                       |
| 313 | 707 | 0.02 | Q39QM2     | <i>Geobacter metallireducens</i> | K(+)-insensitive pyrophosphate-energized proton pump (EC 3.6.1.1) (Membrane-bound proton-translocating pyrophosphatase) (Pyrophosphate-energized inorganic pyrophosphatase) (H(+)-PPase) |
| 314 | 706 | 0.02 | A5G3L3     | <i>Geobacter uraniireducens</i>  | Isocitrate dehydrogenase, NADP-dependent (EC 1.1.1.42)                                                                                                                                   |
| 315 | 705 | 0.02 | AOA0D5N3E1 | <i>Geobacter sulfurreducens</i>  | Conjugal transfer protein TrbC                                                                                                                                                           |
| 316 | 705 | 0.02 | Q39YR4     | <i>Geobacter metallireducens</i> | FtsK/SpoIIIE domain protein                                                                                                                                                              |
| 317 | 705 | 0.02 | Q748Y3     | <i>Geobacter sulfurreducens</i>  | 50S ribosomal protein L1                                                                                                                                                                 |
| 318 | 704 | 0.02 | AOA0D5NCM1 | <i>Geobacter sulfurreducens</i>  | Transposase                                                                                                                                                                              |
| 319 | 700 | 0.02 | AOA0B5BBZ4 | <i>Geobacter pickeringii</i>     | DNA polymerase I (EC 2.7.7.7)                                                                                                                                                            |
| 320 | 700 | 0.02 | Q39QN4     | <i>Geobacter metallireducens</i> | Pentapeptide repeat protein                                                                                                                                                              |
| 321 | 699 | 0.02 | Q746S4     | <i>Geobacter sulfurreducens</i>  | NADH-quinone oxidoreductase subunit B/C/D (EC 1.6.5.11) (NADH dehydrogenase I subunit B/C/D) (NDH-1 subunit B/C/D)                                                                       |
| 322 | 698 | 0.02 | AOA0B5B7K6 | <i>Geobacter pickeringii</i>     | Cytochrome C biogenesis protein ResC                                                                                                                                                     |
| 323 | 696 | 0.02 | AOA0B5BK07 | <i>Geobacter pickeringii</i>     | Histidine kinase                                                                                                                                                                         |
| 324 | 696 | 0.02 | B9M149     | <i>Geobacter daltonii</i>        | Translation-regulating membrane GTPase TypA                                                                                                                                              |
| 325 | 695 | 0.02 | AOA0B5BE51 | <i>Geobacter pickeringii</i>     | DNA replication and repair protein RecF                                                                                                                                                  |
| 326 | 695 | 0.02 | AOA1G0LRW7 | <i>Geobacteraceae bacterium</i>  | Uncharacterized protein                                                                                                                                                                  |
| 327 | 692 | 0.02 | P61946     | <i>Geobacter sulfurreducens</i>  | S-adenosylmethionine synthase (AdoMet synthase) (EC 2.5.1.6) (MAT) (Methionine adenosyltransferase)                                                                                      |
| 328 | 690 | 0.02 | AOA0B5BCP9 | <i>Geobacter pickeringii</i>     | Uncharacterized protein                                                                                                                                                                  |
| 329 | 689 | 0.02 | AOA0B5BCH1 | <i>Geobacter pickeringii</i>     | Hydrogenase 2 large subunit (EC 1.12.99.6)                                                                                                                                               |
| 330 | 689 | 0.02 | AOA0B5BG42 | <i>Geobacter pickeringii</i>     | Vitamin B12-dependent ribonucleotide reductase (EC 1.17.4.1)                                                                                                                             |
| 331 | 689 | 0.02 | Q74AR7     | <i>Geobacter sulfurreducens</i>  | Membrane-associated metal-dependent phosphohydrolase, HDc domain-containing                                                                                                              |
| 332 | 688 | 0.02 | B9M6V1     | <i>Geobacter daltonii</i>        | DNA-directed RNA polymerase subunit beta' (RNAP subunit beta') (EC 2.7.7.6) (RNA polymerase subunit beta') (Transcriptase subunit beta')                                                 |
| 333 | 686 | 0.02 | AOA0B5B7G6 | <i>Geobacter pickeringii</i>     | Cytochrome C                                                                                                                                                                             |
| 334 | 685 | 0.02 | AOA0D5N930 | <i>Geobacter sulfurreducens</i>  | Cytochrome C                                                                                                                                                                             |
| 335 | 685 | 0.02 | Q746T2     | <i>Geobacter sulfurreducens</i>  | NADH-quinone oxidoreductase subunit H 2 (EC 1.6.5.11) (NADH dehydrogenase I subunit H 2) (NDH-1 subunit H 2)                                                                             |
| 336 | 685 | 0.02 | Q39RQ5     | <i>Geobacter metallireducens</i> | Chaperone protein ClpB                                                                                                                                                                   |
| 337 | 683 | 0.02 | AOA0D5N6L1 | <i>Geobacter sulfurreducens</i>  | Histidine kinase                                                                                                                                                                         |
| 338 | 682 | 0.02 | AOA0B5BDP4 | <i>Geobacter pickeringii</i>     | Polya polymerase                                                                                                                                                                         |
| 339 | 682 | 0.02 | Q74D56     | <i>Geobacter sulfurreducens</i>  | Aspartate--tRNA(Asp/Asn) ligase (EC 6.1.1.23) (Aspartyl-tRNA synthetase) (AspRS) (Non-discriminating aspartyl-tRNA synthetase) (ND-AspRS)                                                |

|     |     |      |            |                                   |                                                                                                                                                                                                                                 |
|-----|-----|------|------------|-----------------------------------|---------------------------------------------------------------------------------------------------------------------------------------------------------------------------------------------------------------------------------|
| 340 | 681 | 0.02 | Q39ZM0     | <i>Geobacter metallireducens</i>  | Iron-sulfur cluster-binding sigma-54-dependent transcriptional regulator, FehydgC and FeS domain-containing                                                                                                                     |
| 341 | 681 | 0.02 | Q74D04     | <i>Geobacter sulfurreducens</i>   | Threonine--tRNA ligase (EC 6.1.1.3) (Threonyl-tRNA synthetase) (ThrRS)                                                                                                                                                          |
| 342 | 680 | 0.02 | A0A0C1TL33 | <i>Geobacter soli</i>             | Uncharacterized protein                                                                                                                                                                                                         |
| 343 | 680 | 0.02 | A0A0D5N2Y9 | <i>Geobacter sulfurreducens</i>   | Diguanylate cyclase                                                                                                                                                                                                             |
| 344 | 680 | 0.02 | A0A0D5N645 | <i>Geobacter sulfurreducens</i>   | Penicillin-binding protein                                                                                                                                                                                                      |
| 345 | 680 | 0.02 |            |                                   |                                                                                                                                                                                                                                 |
| 346 | 679 | 0.02 | A5G8W9     | <i>Geobacter uraniireducens</i>   | Flagellar hook-associated protein 2 (HAP2) (Flagellar cap protein)                                                                                                                                                              |
| 347 | 679 | 0.02 | B3E8E5     | <i>Geobacter lovleyi</i>          | Cell surface receptor IPT/TIG domain protein                                                                                                                                                                                    |
| 348 | 679 | 0.02 | Q39QJ4     | <i>Geobacter metallireducens</i>  | Chemotaxis protein methyltransferase (EC 2.1.1.80)                                                                                                                                                                              |
| 349 | 678 | 0.02 | A0A0D5N435 | <i>Geobacter sulfurreducens</i>   | Multidrug transporter                                                                                                                                                                                                           |
| 350 | 678 | 0.02 | Q39XG6     | <i>Geobacter metallireducens</i>  | Pyruvate carboxylase (EC 6.4.1.1)                                                                                                                                                                                               |
| 351 | 677 | 0.02 | A1AKK9     | <i>Pelobacter propionicus</i>     | Conserved hypothetical membrane protein                                                                                                                                                                                         |
| 352 | 676 | 0.02 | Q74GH2     | <i>Geobacter sulfurreducens</i>   | Cytochrome c, and cytochrome b                                                                                                                                                                                                  |
| 353 | 675 | 0.02 | A0A0M3QFU7 | <i>Desulfuromonas soudanensis</i> | Transposase, IS630 family                                                                                                                                                                                                       |
| 354 | 675 | 0.02 | Q74D18     | <i>Geobacter sulfurreducens</i>   | ABC transporter, ATP-binding protein                                                                                                                                                                                            |
| 355 | 673 | 0.02 | A0A0D5NCU1 | <i>Geobacter sulfurreducens</i>   | Nucleotidyl transferase, PF08843 family protein                                                                                                                                                                                 |
| 356 | 672 | 0.02 | D4H180     | <i>Denitrovibrio acetiphilus</i>  | Proton-translocating NADH-quinone oxidoreductase, chain L                                                                                                                                                                       |
| 357 | 672 | 0.02 | Q74E27     | <i>Geobacter sulfurreducens</i>   | Ribonuclease Y (RNase Y) (EC 3.1.-.-)                                                                                                                                                                                           |
| 358 | 671 | 0.02 | Q39YP6     | <i>Geobacter metallireducens</i>  | Histidinol-phosphate aminotransferase (EC 2.6.1.9) (Imidazole acetol-phosphate transaminase)                                                                                                                                    |
| 359 | 671 | 0.02 | Q748A7     | <i>Geobacter sulfurreducens</i>   | Transcription termination factor Rho (EC 3.6.4.-) (ATP-dependent helicase Rho)                                                                                                                                                  |
| 360 | 670 | 0.02 | A0A0B5BFC0 | <i>Geobacter pickeringii</i>      | Ni/Fe hydrogenase                                                                                                                                                                                                               |
| 361 | 670 | 0.02 | B9M5J8     | <i>Geobacter daltonii</i>         | CRISPR-associated protein Csd1                                                                                                                                                                                                  |
| 362 | 669 | 0.02 | A0A0B5BJ50 | <i>Geobacter pickeringii</i>      | Chemotaxis protein CheA                                                                                                                                                                                                         |
| 363 | 669 | 0.02 |            |                                   |                                                                                                                                                                                                                                 |
| 364 | 668 | 0.02 | Q74B63     | <i>Geobacter sulfurreducens</i>   | Uncharacterized protein                                                                                                                                                                                                         |
| 365 | 668 | 0.02 | Q74F32     | <i>Geobacter sulfurreducens</i>   | Periplasmically oriented, membrane-bound formate dehydrogenase, major subunit, selenocysteine-containing                                                                                                                        |
| 366 | 664 | 0.02 | A0A0D5N7A2 | <i>Geobacter sulfurreducens</i>   | Chemotaxis protein CheY                                                                                                                                                                                                         |
| 367 | 664 | 0.02 | Q39W76     | <i>Geobacter metallireducens</i>  | Ketol-acid reductoisomerase (NADP(+)) (KARI) (EC 1.1.1.86) (Acetohydroxy-acid isomeroeductase) (AHIR) (Alpha-keto-beta-hydroxylacyl reductoisomerase) (Ketol-acid reductoisomerase type 1) (Ketol-acid reductoisomerase type I) |
| 368 | 661 | 0.02 | A0A0D5N4Y8 | <i>Geobacter sulfurreducens</i>   | Pilus assembly protein PilB                                                                                                                                                                                                     |
| 369 | 660 | 0.02 | A0A1G1FB69 | <i>Nitrospirae bacterium</i>      | Uncharacterized protein                                                                                                                                                                                                         |
| 370 | 659 | 0.02 | A0A0B5BB11 | <i>Geobacter pickeringii</i>      | Pyruvate carboxylase (EC 6.4.1.1)                                                                                                                                                                                               |
| 371 | 657 | 0.02 | A0A0B5B6N9 | <i>Geobacter pickeringii</i>      | Alanine--tRNA ligase (EC 6.1.1.7) (Alanyl-tRNA synthetase) (AlaRS)                                                                                                                                                              |



|     |     |      |            |                                  |                                                                                                                                                    |
|-----|-----|------|------------|----------------------------------|----------------------------------------------------------------------------------------------------------------------------------------------------|
| 372 | 657 | 0.02 | B9LZR8     | <i>Geobacter daltonii</i>        | Succinyl:acetate coenzyme A transferase                                                                                                            |
| 373 | 656 | 0.02 | Q74H59     | <i>Geobacter sulfurreducens</i>  | Chaperone protein DnaK (HSP70) (Heat shock 70 kDa protein) (Heat shock protein 70)                                                                 |
| 374 | 655 | 0.02 | A0A0A8WQT9 | <i>Geobacter sp.</i>             | Dyslexia-associated protein                                                                                                                        |
| 375 | 655 | 0.02 | P61343     | <i>Geobacter sulfurreducens</i>  | Aspartyl/glutamyl-tRNA(Asn/Gln) amidotransferase subunit B (Asp/Glu-ADT subunit B) (EC 6.3.5.-)                                                    |
| 376 | 653 | 0.02 | Q747D6     | <i>Geobacter sulfurreducens</i>  | Pyruvate kinase (EC 2.7.1.40)                                                                                                                      |
| 377 | 651 | 0.02 | Q39ZP3     | <i>Geobacter metallireducens</i> | VWFA superfamily protein                                                                                                                           |
| 378 | 650 | 0.02 | Q39VA8     | <i>Geobacter metallireducens</i> | Transcription termination/antitermination protein NusA                                                                                             |
| 379 | 649 | 0.02 | A0A0D5N6S5 | <i>Geobacter sulfurreducens</i>  | Magnesium transport protein CorA                                                                                                                   |
| 380 | 649 | 0.02 | P61523     | <i>Geobacter sulfurreducens</i>  | Argininosuccinate synthase (EC 6.3.4.5) (Citrulline--aspartate ligase)                                                                             |
| 381 | 649 | 0.02 | D4H844     | <i>Denitrovibrio acetiphilus</i> | Carbamoyl-phosphate synthase large chain (EC 6.3.5.5) (Carbamoyl-phosphate synthetase ammonia chain)                                               |
| 382 | 648 | 0.02 | Q39QK1     | <i>Geobacter metallireducens</i> | Adenylosuccinate synthetase (AMPSase) (AdSS) (EC 6.3.4.4) (IMP--aspartate ligase)                                                                  |
| 383 | 644 | 0.02 | A0A0D5N4L7 | <i>Geobacter sulfurreducens</i>  | Outer membrane protein assembly factor BamA                                                                                                        |
| 384 | 644 | 0.02 | I7EP93     | <i>Geobacter sulfurreducens</i>  | Uncharacterized protein                                                                                                                            |
| 385 | 644 | 0.02 | Q748B3     | <i>Geobacter sulfurreducens</i>  | UDP-N-acetylglucosamine 1-carboxyvinyltransferase (EC 2.5.1.7) (Enoylpyruvate transferase) (UDP-N-acetylglucosamine enolpyruvyl transferase) (EPT) |
| 386 | 644 | 0.02 | Q74B69     | <i>Geobacter sulfurreducens</i>  | Peptidoglycan-binding protein, OmpA family                                                                                                         |
| 387 | 644 | 0.02 | Q74D76     | <i>Geobacter sulfurreducens</i>  | Histidine kinase (EC 2.7.13.3)                                                                                                                     |
| 388 | 644 | 0.02 | Q74EP9     | <i>Geobacter sulfurreducens</i>  | DNA-binding ATPase Uup                                                                                                                             |
| 389 | 641 | 0.02 | A0A0B5B8J3 | <i>Geobacter pickeringii</i>     | Rod shape-determining protein RodA                                                                                                                 |
| 390 | 641 | 0.02 | Q39X71     | <i>Geobacter metallireducens</i> | Uncharacterized protein                                                                                                                            |
| 391 | 640 | 0.02 | A5GAC6     | <i>Geobacter uraniireducens</i>  | FMN-dependent NADH-azoreductase (EC 1.7.-.-) (Azo-dye reductase) (FMN-dependent NADH-azo compound oxidoreductase)                                  |
| 392 | 638 | 0.02 | Q74AT0     | <i>Geobacter sulfurreducens</i>  | Lysine--tRNA ligase (EC 6.1.1.6) (Lysyl-tRNA synthetase) (LysRS)                                                                                   |
| 393 | 637 | 0.02 | Q74FM8     | <i>Geobacter sulfurreducens</i>  | Glycine--tRNA ligase alpha subunit (EC 6.1.1.14) (Glycyl-tRNA synthetase alpha subunit) (GlyRS)                                                    |
| 394 | 635 | 0.02 | B9M7P3     | <i>Geobacter daltonii</i>        | UvrABC system protein A (UvrA protein) (Excinuclease ABC subunit A)                                                                                |
| 395 | 634 | 0.02 | A0A0B5B792 | <i>Geobacter pickeringii</i>     | Flagellar biosynthesis protein FlhF                                                                                                                |
| 396 | 633 | 0.02 | A0A0B5BIA1 | <i>Geobacter pickeringii</i>     | DNA-directed DNA polymerase (EC 2.7.7.7)                                                                                                           |
| 397 | 631 | 0.02 | A0A1G0LEY2 | <i>Geobacteraceae bacterium</i>  | Uncharacterized protein                                                                                                                            |
| 398 | 631 | 0.02 | B3EAZ5     | <i>Geobacter lovleyi</i>         | TraG family protein                                                                                                                                |
| 399 | 631 | 0.02 | Q74GK2     | <i>Geobacter sulfurreducens</i>  | Radical SAM domain iron-sulfur cluster-binding oxidoreductase                                                                                      |
| 400 | 630 | 0.02 | Q39RK5     | <i>Geobacter metallireducens</i> | ResB-like family cytochrome c                                                                                                                      |
| 401 | 628 | 0.02 | A0A0A8WMQ9 | <i>Geobacter sp.</i>             | Uncharacterized protein                                                                                                                            |
| 402 | 628 | 0.02 | A5GBP1     | <i>Geobacter uraniireducens</i>  | Uncharacterized protein                                                                                                                            |
| 403 | 628 | 0.02 |            |                                  |                                                                                                                                                    |

|     |     |      |            |                                     |                                                                                                                                          |
|-----|-----|------|------------|-------------------------------------|------------------------------------------------------------------------------------------------------------------------------------------|
| 404 | 627 | 0.02 | A0A1G0M4P0 | <i>Geobacteraceae bacterium</i>     | Isocitrate dehydrogenase (NADP(+))                                                                                                       |
| 405 | 627 | 0.02 | Q39ZH5     | <i>Geobacter metallireducens</i>    | Cytochrome c/b                                                                                                                           |
| 406 | 627 | 0.02 | Q748T9     | <i>Geobacter sulfurreducens</i>     | Cytochrome c                                                                                                                             |
| 407 | 626 | 0.02 | A0A0B5BHU5 | <i>Geobacter pickeringii</i>        | Peptidylprolyl isomerase (EC 5.2.1.8)                                                                                                    |
| 408 | 626 | 0.02 | A0A0D5N9G3 | <i>Geobacter sulfurreducens</i>     | Multidrug ABC transporter substrate-binding protein                                                                                      |
| 409 | 626 | 0.02 |            |                                     |                                                                                                                                          |
| 410 | 625 | 0.02 | A0A1G0LUU9 | <i>Geobacteraceae bacterium</i>     | NADH dehydrogenase                                                                                                                       |
| 411 | 625 | 0.02 | Q747E4     | <i>Geobacter sulfurreducens</i>     | Polyphosphate kinase (EC 2.7.4.1) (ATP-polyphosphate phosphotransferase) (Polyphosphoric acid kinase)                                    |
| 412 | 624 | 0.02 | A0A0C1U294 | <i>Geobacter soli</i>               | Pilus assembly protein PilQ                                                                                                              |
| 413 | 623 | 0.02 | A0A0C1TS26 | <i>Geobacter soli</i>               | L-aspartate oxidase (EC 1.4.3.16)                                                                                                        |
| 414 | 623 | 0.02 | Q39UH4     | <i>Geobacter metallireducens</i>    | Lon protease (EC 3.4.21.53) (ATP-dependent protease La)                                                                                  |
| 415 | 622 | 0.02 | A0A0A8WQH6 | <i>Geobacter sp.</i>                | Uncharacterized protein                                                                                                                  |
| 416 | 622 | 0.02 | A0A0B5BJM3 | <i>Geobacter pickeringii</i>        | NADH-ubiquinone oxidoreductase subunit 3                                                                                                 |
| 417 | 622 | 0.02 | A0A0D5NDV9 | <i>Geobacter sulfurreducens</i>     | HD family phosphohydrolase                                                                                                               |
| 418 | 622 | 0.02 | A0A1F9PTX0 | <i>Desulfuromonadales bacterium</i> | Pyruvate-flavodoxin oxidoreductase (EC 1.2.7.-)                                                                                          |
| 419 | 621 | 0.02 | Q74BT1     | <i>Geobacter sulfurreducens</i>     | Repeat-containing protein                                                                                                                |
| 420 | 619 | 0.02 | Q746X5     | <i>Geobacter sulfurreducens</i>     | Branched-chain amino acid ABC transporter, membrane protein                                                                              |
| 421 | 616 | 0.02 |            |                                     |                                                                                                                                          |
| 422 | 615 | 0.02 | A0A0B5BFH3 | <i>Geobacter pickeringii</i>        | Polyribonucleotide nucleotidyltransferase (EC 2.7.7.8) (Polynucleotide phosphorylase) (PNPase)                                           |
| 423 | 614 | 0.02 | A0A0A8WT91 | <i>Geobacter sp.</i>                | Protein-export membrane protein SecF                                                                                                     |
| 424 | 614 | 0.02 | A0A0B5BLL1 | <i>Geobacter pickeringii</i>        | Pyridine nucleotide-disulfide oxidoreductase                                                                                             |
| 425 | 614 | 0.02 | A0A0D5N717 | <i>Geobacter sulfurreducens</i>     | DNA polymerase III subunit beta (EC 2.7.7.7)                                                                                             |
| 426 | 614 | 0.02 | A5G9T7     | <i>Geobacter uraniireducens</i>     | Peptide chain release factor 3 (RF-3)                                                                                                    |
| 427 | 613 | 0.02 | A0A0D5N6Q2 | <i>Geobacter sulfurreducens</i>     | Lactamase                                                                                                                                |
| 428 | 613 | 0.02 | Q74A32     | <i>Geobacter sulfurreducens</i>     | PppGpp 5'-phosphohydrolase and exopolyphosphatase, HD domain-containing                                                                  |
| 429 | 612 | 0.02 | A0A0B5BJG9 | <i>Geobacter pickeringii</i>        | GntR family transcriptional regulator                                                                                                    |
| 430 | 612 | 0.02 | A5G8I3     | <i>Geobacter uraniireducens</i>     | Chaperone protein ClpB                                                                                                                   |
| 431 | 612 | 0.02 | Q74AF7     | <i>Geobacter sulfurreducens</i>     | Methyl viologen-reducing hydrogenase, large subunit                                                                                      |
| 432 | 610 | 0.02 | A0A0B5BJ79 | <i>Geobacter pickeringii</i>        | NADH dehydrogenase                                                                                                                       |
| 433 | 609 | 0.02 | Q39PS5     | <i>Geobacter metallireducens</i>    | Quinolinate synthase A (EC 2.5.1.72)                                                                                                     |
| 434 | 609 | 0.02 | Q39XX9     | <i>Geobacter metallireducens</i>    | DNA-directed RNA polymerase subunit alpha (RNAP subunit alpha) (EC 2.7.7.6) (RNA polymerase subunit alpha) (Transcriptase subunit alpha) |
| 435 | 608 | 0.02 | A0A0D5N5H4 | <i>Geobacter sulfurreducens</i>     | Cell division protein FtsK                                                                                                               |
| 436 | 607 | 0.02 | Q748Y7     | <i>Geobacter sulfurreducens</i>     | 30S ribosomal protein S7                                                                                                                 |

|     |     |      |            |                                     |                                                                                                                                                                                                                              |
|-----|-----|------|------------|-------------------------------------|------------------------------------------------------------------------------------------------------------------------------------------------------------------------------------------------------------------------------|
| 437 | 606 | 0.02 | A0A0B5B7V2 | <i>Geobacter pickeringii</i>        | Ribosome-binding ATPase YchF                                                                                                                                                                                                 |
| 438 | 606 | 0.02 | A0A0B5BBV1 | <i>Geobacter pickeringii</i>        | Cytochrome C                                                                                                                                                                                                                 |
| 439 | 606 | 0.02 | Q39RQ8     | <i>Geobacter metallireducens</i>    | Ribose-phosphate pyrophosphokinase (RPPK) (EC 2.7.6.1) (5-phospho-D-ribosyl alpha-1-diphosphate) (Phosphoribosyl diphosphate synthase) (Phosphoribosyl pyrophosphate synthase) (P-Rib-PP synthase) (PRPP synthase) (PRPPase) |
| 440 | 606 | 0.02 | Q74BB7     | <i>Geobacter sulfurreducens</i>     | Thioredoxin-related domain protein                                                                                                                                                                                           |
| 441 | 605 | 0.02 | A0A0B5BB86 | <i>Geobacter pickeringii</i>        | Uncharacterized protein                                                                                                                                                                                                      |
| 442 | 605 | 0.02 | A0A0D5N3S3 | <i>Geobacter sulfurreducens</i>     | Chemotaxis protein CheY                                                                                                                                                                                                      |
| 443 | 604 | 0.02 | A0A0B5B8W1 | <i>Geobacter pickeringii</i>        | ATP-dependent zinc metalloprotease FtsH (EC 3.4.24.-)                                                                                                                                                                        |
| 444 | 604 | 0.02 | A0A0C1TWG6 | <i>Geobacter soli</i>               | Histidine kinase                                                                                                                                                                                                             |
| 445 | 604 | 0.02 | Q748X2     | <i>Geobacter sulfurreducens</i>     | 3-isopropylmalate dehydrogenase (EC 1.1.1.85) (3-IPM-DH) (Beta-IPM dehydrogenase) (IMDH)                                                                                                                                     |
| 446 | 603 | 0.02 | A0A0B5BJA2 | <i>Geobacter pickeringii</i>        | RND transporter                                                                                                                                                                                                              |
| 447 | 603 | 0.02 | Q39UG5     | <i>Geobacter metallireducens</i>    | Aspartokinase (EC 2.7.2.4)                                                                                                                                                                                                   |
| 448 | 603 | 0.02 | Q74GB8     | <i>Geobacter sulfurreducens</i>     | Type II secretion system ATPase GspE                                                                                                                                                                                         |
| 449 | 602 | 0.02 | A0A0B5B822 | <i>Geobacter pickeringii</i>        | Formate dehydrogenase                                                                                                                                                                                                        |
| 450 | 601 | 0.02 | A0A0B5BBP3 | <i>Geobacter pickeringii</i>        | Flagellar basal body stator protein MotB                                                                                                                                                                                     |
| 451 | 599 | 0.02 | A0A0B5BIX5 | <i>Geobacter pickeringii</i>        | DNA polymerase II                                                                                                                                                                                                            |
| 452 | 599 | 0.02 | B5E8R5     | <i>Geobacter bemidjensis</i>        | Glutamine synthetase (EC 6.3.1.2)                                                                                                                                                                                            |
| 453 | 597 | 0.02 | A0A0D5N7J7 | <i>Geobacter sulfurreducens</i>     | Alpha-glucan phosphorylase                                                                                                                                                                                                   |
| 454 | 597 | 0.02 | A0A1F9PKR5 | <i>Desulfuromonadales bacterium</i> | Uncharacterized protein                                                                                                                                                                                                      |
| 455 | 597 | 0.02 | Q39QB1     | <i>Geobacter metallireducens</i>    | NADH dehydrogenase I, E subunit                                                                                                                                                                                              |
| 456 | 597 | 0.02 | Q39RM2     | <i>Geobacter metallireducens</i>    | Glycosyltransferase                                                                                                                                                                                                          |
| 457 | 596 | 0.02 | A0A0B5B8X9 | <i>Geobacter pickeringii</i>        | Phosphoenolpyruvate-protein phosphotransferase (EC 2.7.3.9) (Phosphotransferase system, enzyme I)                                                                                                                            |
| 458 | 596 | 0.02 | Q39WZ1     | <i>Geobacter metallireducens</i>    | Nitrogen fixation protein NifU                                                                                                                                                                                               |
| 459 | 596 | 0.02 | Q39ZI6     | <i>Geobacter metallireducens</i>    | DNA helicase (EC 3.6.4.12)                                                                                                                                                                                                   |
| 460 | 595 | 0.02 | Q74G55     | <i>Geobacter sulfurreducens</i>     | Efflux pump, RND family, inner membrane protein                                                                                                                                                                              |
| 461 | 594 | 0.02 | A0A0B5BD26 | <i>Geobacter pickeringii</i>        | CDP-diacylglycerol--serine O-phosphatidyltransferase                                                                                                                                                                         |
| 462 | 594 | 0.02 | Q39X31     | <i>Geobacter metallireducens</i>    | Protein translocase subunit SecA                                                                                                                                                                                             |
| 463 | 592 | 0.02 | A0A0D5N7G7 | <i>Geobacter sulfurreducens</i>     | Periplasmic serine endoprotease DegP-like (EC 3.4.21.107)                                                                                                                                                                    |
| 464 | 592 | 0.02 | D4H7W9     | <i>Denitrovibrio acetiphilus</i>    | Translation initiation factor IF-2                                                                                                                                                                                           |
| 465 | 591 | 0.02 | Q748Z0     | <i>Geobacter sulfurreducens</i>     | 30S ribosomal protein S10                                                                                                                                                                                                    |
| 466 | 590 | 0.02 | A0A0A8WW30 | <i>Geobacter sp.</i>                | DNA-directed RNA polymerase subunit beta (RNAP subunit beta) (EC 2.7.7.6) (RNA polymerase subunit beta) (Transcriptase subunit beta)                                                                                         |
| 467 | 590 | 0.02 | A0A0D5N2Q7 | <i>Geobacter sulfurreducens</i>     | DNA-binding protein                                                                                                                                                                                                          |

|     |     |      |            |                                     |                                                                                                                    |
|-----|-----|------|------------|-------------------------------------|--------------------------------------------------------------------------------------------------------------------|
| 468 | 589 | 0.02 | A0A0B5BBX6 | <i>Geobacter pickeringii</i>        | Ribonuclease E (RNase E) (EC 3.1.26.12)                                                                            |
| 469 | 589 | 0.02 | A0A0B5BDV3 | <i>Geobacter pickeringii</i>        | L-threonine aldolase (EC 4.1.2.48)                                                                                 |
| 470 | 589 | 0.02 | A0A0B5BHJ9 | <i>Geobacter pickeringii</i>        | Chaperone protein HtpG (Heat shock protein HtpG) (High temperature protein G)                                      |
| 471 | 589 | 0.02 | Q74EQ2     | <i>Geobacter sulfurreducens</i>     | Aldehyde:ferredoxin oxidoreductase, tungsten-containing                                                            |
| 472 | 588 | 0.02 | A0A0B5B9Q9 | <i>Geobacter pickeringii</i>        | Glycosyl transferase                                                                                               |
| 473 | 587 | 0.02 | A0A0B5BEL7 | <i>Geobacter pickeringii</i>        | Cytochrome C                                                                                                       |
| 474 | 587 | 0.02 | A0A0C1TRJ5 | <i>Geobacter soli</i>               | Uncharacterized protein                                                                                            |
| 475 | 585 | 0.02 | Q746W5     | <i>Geobacter sulfurreducens</i>     | Outer membrane channel, OmpJ-related protein                                                                       |
| 476 | 585 | 0.02 | Q747I8     | <i>Geobacter sulfurreducens</i>     | Pentapeptide repeat protein                                                                                        |
| 477 | 585 | 0.02 | W6LX92     | <i>Cand. Contendobacter odensis</i> | Putative Lipoprotein                                                                                               |
| 478 | 584 | 0.02 | Q39Z54     | <i>Geobacter metallireducens</i>    | Membrane protein, putative                                                                                         |
| 479 | 583 | 0.02 | A0A0B5BCX9 | <i>Geobacter pickeringii</i>        | Flagellar motor protein MotA                                                                                       |
| 480 | 583 | 0.02 | B5EE12     | <i>Geobacter bemidjiensis</i>       | ABC transporter, membrane protein                                                                                  |
| 481 | 582 | 0.02 | Q39XB5     | <i>Geobacter metallireducens</i>    | 30S ribosomal protein S1                                                                                           |
| 482 | 581 | 0.02 | AOA1E4LQS0 | <i>Comamonadaceae bacterium</i>     | Histidine kinase                                                                                                   |
| 483 | 580 | 0.02 | A0A0B5BCD2 | <i>Geobacter pickeringii</i>        | Flagellar biosynthetic protein FlIR                                                                                |
| 484 | 580 | 0.02 | A0LQ19     | <i>Syntrophobacter fumaroxidans</i> | Phospholipase D/Transphosphatidylase                                                                               |
| 485 | 580 | 0.02 | Q39RQ2     | <i>Geobacter metallireducens</i>    | RNA polymerase sigma factor                                                                                        |
| 486 | 580 | 0.02 | Q39YM5     | <i>Geobacter metallireducens</i>    | Peptidoglycan transglycosylase and transpeptidase FtsI                                                             |
| 487 | 579 | 0.02 | AOA0D5N653 | <i>Geobacter sulfurreducens</i>     | Histidine kinase                                                                                                   |
| 488 | 579 | 0.02 | AOA1G0LYB2 | <i>Geobacteraceae bacterium</i>     | Uncharacterized protein                                                                                            |
| 489 | 579 | 0.02 | Q39U98     | <i>Geobacter metallireducens</i>    | Phosphoglycerate kinase (EC 2.7.2.3)                                                                               |
| 490 | 579 | 0.02 | Q39Y82     | <i>Geobacter metallireducens</i>    | 5-methyltetrahydrofolate--homocysteine S-methyltransferase, cobalamin-dependent                                    |
| 491 | 578 | 0.02 | A0A0D5N9L3 | <i>Geobacter sulfurreducens</i>     | Uncharacterized protein                                                                                            |
| 492 | 577 | 0.02 | A0A0B5BHF1 | <i>Geobacter pickeringii</i>        | Antibiotic ABC transporter ATP-binding protein                                                                     |
| 493 | 577 | 0.02 | A0A0D5N8L5 | <i>Geobacter sulfurreducens</i>     | Uncharacterized protein                                                                                            |
| 494 | 577 | 0.02 | A0A1T4RTR1 | <i>Geobacter thiogenes</i>          | Iron complex outermembrane receptor protein                                                                        |
| 495 | 576 | 0.02 | A0A0B5BDF3 | <i>Geobacter pickeringii</i>        | Peptidylprolyl isomerase (EC 5.2.1.8)                                                                              |
| 496 | 576 | 0.02 | AOA0D5N5F3 | <i>Geobacter sulfurreducens</i>     | Nitrogenase iron protein (EC 1.18.6.1) (Nitrogenase Fe protein) (Nitrogenase component II) (Nitrogenase reductase) |
| 497 | 576 | 0.02 | Q749D7     | <i>Geobacter sulfurreducens</i>     | Nitrogenase molybdenum-iron cofactor biosynthesis protein NifEN                                                    |
| 498 | 575 | 0.02 | A0A0B5BJS3 | <i>Geobacter pickeringii</i>        | Integrase                                                                                                          |
| 499 | 575 | 0.02 |            |                                     |                                                                                                                    |
| 500 | 574 | 0.02 | A0A0B5B8X8 | <i>Geobacter pickeringii</i>        | Pilus assembly protein PilB                                                                                        |

**Table S5b.** Functional overview of M2C community (top 500 rank only).

| Rank | Count | Abundance | ID         | Organism                           | Protein Names                                                                                                                                                                            |
|------|-------|-----------|------------|------------------------------------|------------------------------------------------------------------------------------------------------------------------------------------------------------------------------------------|
| 1    | 3767  | 0.11      | AOA1D3L4G2 | <i>Methanobacterium congolense</i> | Uncharacterized protein                                                                                                                                                                  |
| 2    | 2594  | 0.08      | A7I7H9     | <i>Methanoregula boonei</i>        | TPR repeat-containing protein                                                                                                                                                            |
| 3    | 2359  | 0.07      | A7I4I9     | <i>Methanoregula boonei</i>        | DNA polymerase II large subunit (Pol II) (EC 2.7.7.7)                                                                                                                                    |
| 4    | 2284  | 0.07      | AOA1D3L5C3 | <i>Methanobacterium congolense</i> | Uncharacterized protein                                                                                                                                                                  |
| 5    | 2163  | 0.07      | A0A090I137 | <i>Methanobacterium formicicum</i> | Transposase                                                                                                                                                                              |
| 6    | 1978  | 0.06      | A7IAM2     | <i>Methanoregula boonei</i>        | Isoleucine--tRNA ligase (EC 6.1.1.5) (Isoleucyl-tRNA synthetase) (IleRS)                                                                                                                 |
| 7    | 1951  | 0.06      | A0A1D3L0E4 | <i>Methanobacterium congolense</i> | WD40 domain-containing protein                                                                                                                                                           |
| 8    | 1882  | 0.06      |            |                                    |                                                                                                                                                                                          |
| 9    | 1819  | 0.05      | AOA1D3L0V2 | <i>Methanobacterium congolense</i> | Putative ATP-dependent helicase MG140 (EC 3.6.4.-)                                                                                                                                       |
| 10   | 1761  | 0.05      | AOA1D3L429 | <i>Methanobacterium congolense</i> | Uncharacterized protein                                                                                                                                                                  |
| 11   | 1761  | 0.05      | A7IAV3     | <i>Methanoregula boonei</i>        | V-type ATP synthase subunit I                                                                                                                                                            |
| 12   | 1721  | 0.05      | A7I486     | <i>Methanoregula boonei</i>        | K(+)-insensitive pyrophosphate-energized proton pump (EC 3.6.1.1) (Membrane-bound proton-translocating pyrophosphatase) (Pyrophosphate-energized inorganic pyrophosphatase) (H(+)-PPase) |
| 13   | 1712  | 0.05      | A7IAD8     | <i>Methanoregula boonei</i>        | Chromosome partition protein Smc                                                                                                                                                         |
| 14   | 1692  | 0.05      | A7I9N6     | <i>Methanoregula boonei</i>        | DNA-directed RNA polymerase subunit (EC 2.7.7.6)                                                                                                                                         |
| 15   | 1668  | 0.05      | A0A1D3KZI4 | <i>Methanobacterium congolense</i> | DNA polymerase II large subunit (Pol II) (EC 2.7.7.7)                                                                                                                                    |
| 16   | 1653  | 0.05      | A0A1D3L508 | <i>Methanobacterium congolense</i> | WD40 domain-containing protein                                                                                                                                                           |
| 17   | 1584  | 0.05      | A0A1D3L5B8 | <i>Methanobacterium congolense</i> | Isoleucine--tRNA ligase (EC 6.1.1.5) (Isoleucyl-tRNA synthetase) (IleRS)                                                                                                                 |
| 18   | 1573  | 0.05      | A7I9M8     | <i>Methanoregula boonei</i>        | Leucine--tRNA ligase (EC 6.1.1.4) (Leucyl-tRNA synthetase) (LeuRS)                                                                                                                       |
| 19   | 1559  | 0.05      | A7I4X4     | <i>Methanoregula boonei</i>        | Elongation factor 2 (EF-2)                                                                                                                                                               |
| 20   | 1504  | 0.05      | A7I927     | <i>Methanoregula boonei</i>        | Valine--tRNA ligase (EC 6.1.1.9) (Valyl-tRNA synthetase) (ValRS)                                                                                                                         |
| 21   | 1493  | 0.05      | A7I6J1     | <i>Methanoregula boonei</i>        | Carbamoyl-phosphate synthase large chain (EC 6.3.5.5) (Carbamoyl-phosphate synthetase ammonia chain)                                                                                     |
| 22   | 1449  | 0.04      | A0A1D3KZI9 | <i>Methanobacterium congolense</i> | Leucine--tRNA ligase (EC 6.1.1.4) (Leucyl-tRNA synthetase) (LeuRS)                                                                                                                       |
| 23   | 1379  | 0.04      | A7I485     | <i>Methanoregula boonei</i>        | Vitamin B12-dependent ribonucleotide reductase (EC 1.17.4.1)                                                                                                                             |
| 24   | 1369  | 0.04      | P06131     | <i>Methanobacterium formicicum</i> | Formate dehydrogenase subunit alpha (EC 1.2.1.2)                                                                                                                                         |
| 25   | 1363  | 0.04      | A7IAB8     | <i>Methanoregula boonei</i>        | Phosphoenolpyruvate synthase (PEP synthase) (EC 2.7.9.2) (Pyruvate, water dikinase)                                                                                                      |
| 26   | 1331  | 0.04      | A0A1D3L027 | <i>Methanobacterium congolense</i> | Carbamoyl-phosphate synthase large chain (EC 6.3.5.5) (Carbamoyl-phosphate synthetase ammonia chain)                                                                                     |
| 27   | 1309  | 0.04      | F4BUN6     | <i>Methanosaeta concilii</i>       | Transposase, IS116/IS110/IS902 family                                                                                                                                                    |
| 28   | 1301  | 0.04      | A7I4K7     | <i>Methanoregula boonei</i>        | Lysine decarboxylase (EC 4.1.1.18)                                                                                                                                                       |
| 29   | 1299  | 0.04      | A7I766     | <i>Methanoregula boonei</i>        | Efflux transporter, putative, hydrophobe/amphiphile efflux-3 (HAE3) family                                                                                                               |
| 30   | 1288  | 0.04      | A7I791     | <i>Methanoregula boonei</i>        | UvrABC system protein A (UvrA protein) (Excinuclease ABC subunit A)                                                                                                                      |

|    |      |      |            |                                    |                                                                                                                                                                                        |
|----|------|------|------------|------------------------------------|----------------------------------------------------------------------------------------------------------------------------------------------------------------------------------------|
| 31 | 1283 | 0.04 | A0A1D3L5A7 | <i>Methanobacterium congolense</i> | Uncharacterized protein                                                                                                                                                                |
| 32 | 1258 | 0.04 | A7I4R1     | <i>Methanoregula boonei</i>        | Thermosome                                                                                                                                                                             |
| 33 | 1258 | 0.04 | A7I5U5     | <i>Methanoregula boonei</i>        | 4Fe-4S ferredoxin, iron-sulfur binding domain protein                                                                                                                                  |
| 34 | 1252 | 0.04 | A0A1D3L5A8 | <i>Methanobacterium congolense</i> | Long-chain-fatty-acid-CoA ligase FadD15 (EC 6.2.1.3)                                                                                                                                   |
| 35 | 1248 | 0.04 | A0A1D3L3Z9 | <i>Methanobacterium congolense</i> | Uncharacterized protein                                                                                                                                                                |
| 36 | 1235 | 0.04 | A0A1D3KZ93 | <i>Methanobacterium congolense</i> | Sodium/potassium-transporting ATPase subunit alpha-2 (EC 3.6.3.9)                                                                                                                      |
| 37 | 1234 | 0.04 | A7I5I6     | <i>Methanoregula boonei</i>        | Coenzyme F420 hydrogenase (EC 1.12.98.1)                                                                                                                                               |
| 38 | 1232 | 0.04 | A7I6S1     | <i>Methanoregula boonei</i>        | CoA-binding domain protein                                                                                                                                                             |
| 39 | 1231 | 0.04 | A7I9M7     | <i>Methanoregula boonei</i>        | PilT protein domain protein                                                                                                                                                            |
| 40 | 1223 | 0.04 | A0A1D3L3R4 | <i>Methanobacterium congolense</i> | Putative membrane protein MJ1525                                                                                                                                                       |
| 41 | 1217 | 0.04 | A7I8B1     | <i>Methanoregula boonei</i>        | ATP-dependent DNA helicase Hel308 (EC 3.6.4.12)                                                                                                                                        |
| 42 | 1215 | 0.04 | A7I7B5     | <i>Methanoregula boonei</i>        | DNA polymerase (EC 2.7.7.7)                                                                                                                                                            |
| 43 | 1212 | 0.04 | L0HAI4     | <i>Methanoregula formicica</i>     | Formate dehydrogenase, alpha subunit, archaeal-type                                                                                                                                    |
| 44 | 1194 | 0.04 | A7I5I3     | <i>Methanoregula boonei</i>        | Coenzyme F420 hydrogenase/dehydrogenase beta subunit domain protein                                                                                                                    |
| 45 | 1187 | 0.04 | A0A090JUS9 | <i>Methanobacterium formicicum</i> | Putative secreted protein                                                                                                                                                              |
| 46 | 1184 | 0.04 | A0A1D3L2M2 | <i>Methanobacterium congolense</i> | Valine--tRNA ligase (EC 6.1.1.9) (Valyl-tRNA synthetase) (ValRS)                                                                                                                       |
| 47 | 1182 | 0.04 | A7IAF8     | <i>Methanoregula boonei</i>        | ABC-1 domain protein                                                                                                                                                                   |
| 48 | 1179 | 0.04 | A7I4Y9     | <i>Methanoregula boonei</i>        | DEAD/DEAH box helicase domain protein                                                                                                                                                  |
| 49 | 1170 | 0.04 | A7I7S4     | <i>Methanoregula boonei</i>        | Alanine--tRNA ligase (EC 6.1.1.7) (Alanyl-tRNA synthetase) (AlaRS)                                                                                                                     |
| 50 | 1157 | 0.03 | A7I6H7     | <i>Methanoregula boonei</i>        | Methionine--tRNA ligase (EC 6.1.1.10) (Methionyl-tRNA synthetase) (MetRS)                                                                                                              |
| 51 | 1153 | 0.03 | A0A1D3L0B4 | <i>Methanobacterium congolense</i> | Putative ATP-dependent helicase MJ1401 (EC 3.6.4.-)                                                                                                                                    |
| 52 | 1151 | 0.03 | A0A1D3L4E7 | <i>Methanobacterium congolense</i> | Phosphoenolpyruvate synthase (PEP synthase) (EC 2.7.9.2) (Pyruvate, water dikinase)                                                                                                    |
| 53 | 1141 | 0.03 | A0A1D3KZH1 | <i>Methanobacterium congolense</i> | Copper-exporting P-type ATPase A (EC 3.6.3.54)                                                                                                                                         |
| 54 | 1127 | 0.03 | A7I6S6     | <i>Methanoregula boonei</i>        | Elongation factor 1-alpha (EF-1-alpha) (Elongation factor Tu) (EF-Tu)                                                                                                                  |
| 55 | 1109 | 0.03 | A7I8Y5     | <i>Methanoregula boonei</i>        | DEAD/DEAH box helicase domain protein                                                                                                                                                  |
| 56 | 1102 | 0.03 | A0A1D3L596 | <i>Methanobacterium congolense</i> | CoB-CoM heterodisulfide reductase iron-sulfur subunit A (EC 1.8.98.1)                                                                                                                  |
| 57 | 1095 | 0.03 | A0A1D3L3T8 | <i>Methanobacterium congolense</i> | Type IIS restriction enzyme Eco57I (EC 3.1.21.4)                                                                                                                                       |
| 58 | 1092 | 0.03 | A0A1D3L506 | <i>Methanobacterium congolense</i> | Carbamoyltransferase (EC 2.1.3.-)                                                                                                                                                      |
| 59 | 1087 | 0.03 | A0A1D3L379 | <i>Methanobacterium congolense</i> | Calcium-transporting ATPase 1 (EC 3.6.3.8)                                                                                                                                             |
| 60 | 1087 | 0.03 | A7I8B7     | <i>Methanoregula boonei</i>        | ABC transporter related                                                                                                                                                                |
| 61 | 1083 | 0.03 | A0A1D3L4H1 | <i>Methanobacterium congolense</i> | Acetyl-CoA decarbonylase/synthase complex subunit alpha (ACDS complex subunit alpha) (EC 1.2.7.4) (ACDS complex carbon monoxide dehydrogenase subunit alpha) (ACDS CODH subunit alpha) |
| 62 | 1080 | 0.03 | A7I4W0     | <i>Methanoregula boonei</i>        | Oligosaccharyl transferase, STT3 subunit                                                                                                                                               |
| 63 | 1079 | 0.03 | A7I8X9     | <i>Methanoregula boonei</i>        | MCM family protein                                                                                                                                                                     |
| 64 | 1078 | 0.03 | A0A1D3L276 | <i>Methanobacterium congolense</i> | UvrABC system protein A (UvrA protein) (Excinuclease ABC subunit A)                                                                                                                    |

|    |      |      |            |                                    |                                                                                                                                                                                                                                                                                   |
|----|------|------|------------|------------------------------------|-----------------------------------------------------------------------------------------------------------------------------------------------------------------------------------------------------------------------------------------------------------------------------------|
| 65 | 1078 | 0.03 | A7IAZ8     | <i>Methanoregula boonei</i>        | Chaperonin Cpn60/TCP-1                                                                                                                                                                                                                                                            |
| 66 | 1077 | 0.03 | A0A1D3KZY6 | <i>Methanobacterium congolense</i> | Elongation factor 2 (EF-2)                                                                                                                                                                                                                                                        |
| 67 | 1077 | 0.03 | A0A1D3L355 | <i>Methanobacterium congolense</i> | Lon protease (EC 3.4.21.53) (ATP-dependent protease La)                                                                                                                                                                                                                           |
| 68 | 1074 | 0.03 | A0A1D3L007 | <i>Methanobacterium congolense</i> | Alanine--tRNA ligase (EC 6.1.1.7) (Alanyl-tRNA synthetase) (AlaRS)                                                                                                                                                                                                                |
| 69 | 1049 | 0.03 | E1RH75     | <i>Methanobacterium congolense</i> | Putative PAS/PAC sensor protein                                                                                                                                                                                                                                                   |
| 70 | 1046 | 0.03 | A0A1D3L118 | <i>Methanobacterium congolense</i> | Putative thiamine pyrophosphate-containing protein YdaP                                                                                                                                                                                                                           |
| 71 | 1040 | 0.03 | A7I6P0     | <i>Methanoregula boonei</i>        | Threonine--tRNA ligase (EC 6.1.1.3) (Threonyl-tRNA synthetase) (ThrRS)                                                                                                                                                                                                            |
| 72 | 1037 | 0.03 | A7I4F8     | <i>Methanoregula boonei</i>        | Amidophosphoribosyltransferase (ATase) (EC 2.4.2.14) (Glutamine phosphoribosylpyrophosphate amidotransferase) (GPATase)                                                                                                                                                           |
| 73 | 1032 | 0.03 | A0A1D3L5M9 | <i>Methanobacterium congolense</i> | Putative ATP-dependent RNA helicase MJ1505 (EC 3.6.4.13)                                                                                                                                                                                                                          |
| 74 | 1029 | 0.03 | A0A1D3L129 | <i>Methanobacterium congolense</i> | Putative ATP-dependent helicase MTH_1802 (EC 3.6.4.-)                                                                                                                                                                                                                             |
| 75 | 1027 | 0.03 | A0A1D3L0D3 | <i>Methanobacterium congolense</i> | Calcium-transporting ATPase 1 (EC 3.6.3.8)                                                                                                                                                                                                                                        |
| 76 | 1018 | 0.03 | A0A1D3L0D2 | <i>Methanobacterium congolense</i> | Copper-exporting P-type ATPase B (EC 3.6.3.54)                                                                                                                                                                                                                                    |
| 77 | 1013 | 0.03 | A0A1D3KZ84 | <i>Methanobacterium congolense</i> | Uncharacterized protein                                                                                                                                                                                                                                                           |
| 78 | 1013 | 0.03 | A0A1D3L3L7 | <i>Methanobacterium congolense</i> | Metabotropic glutamate receptor-like protein R                                                                                                                                                                                                                                    |
| 79 | 1013 | 0.03 | A0A1D3L4X9 | <i>Methanobacterium congolense</i> | Putative transcriptional regulatory protein pdtaR                                                                                                                                                                                                                                 |
| 80 | 1013 | 0.03 | A7IB30     | <i>Methanoregula boonei</i>        | AAA family ATPase, CDC48 subfamily (EC 3.6.4.6)                                                                                                                                                                                                                                   |
| 81 | 1010 | 0.03 | A7I9Q1     | <i>Methanoregula boonei</i>        | Glutamine synthetase (EC 6.3.1.2)                                                                                                                                                                                                                                                 |
| 82 | 1008 | 0.03 | A7I5R2     | <i>Methanoregula boonei</i>        | Protein translocase subunit SecY (Protein transport protein SEC61 subunit alpha homolog)                                                                                                                                                                                          |
| 83 | 1002 | 0.03 | A0A1D3L4J7 | <i>Methanobacterium congolense</i> | Transglutaminase domain-containing protein                                                                                                                                                                                                                                        |
| 84 | 1002 | 0.03 | L0HCK9     | <i>Methanoregula formicica</i>     | Formylmethanofuran dehydrogenase subunit A                                                                                                                                                                                                                                        |
| 85 | 989  | 0.03 | A7I6L6     | <i>Methanoregula boonei</i>        | DNA topoisomerase 1 (EC 5.99.1.2) (DNA topoisomerase I)                                                                                                                                                                                                                           |
| 86 | 981  | 0.03 | A7IAP7     | <i>Methanoregula boonei</i>        | Probable translation initiation factor IF-2                                                                                                                                                                                                                                       |
| 87 | 981  | 0.03 | A7IA93     | <i>Methanoregula boonei</i>        | CTP synthase (EC 6.3.4.2) (Cytidine 5'-triphosphate synthase) (Cytidine triphosphate synthetase) (CTP synthetase) (CTPS) (UTP--ammonia ligase)                                                                                                                                    |
| 88 | 978  | 0.03 | A7I6T1     | <i>Methanoregula boonei</i>        | Coenzyme F420 hydrogenase/dehydrogenase beta subunit domain protein                                                                                                                                                                                                               |
| 89 | 976  | 0.03 | A0A1D3L0Y3 | <i>Methanobacterium congolense</i> | Cell division cycle protein 48 homolog MJ1156                                                                                                                                                                                                                                     |
| 90 | 964  | 0.03 | A7IAU7     | <i>Methanoregula boonei</i>        | V-type ATP synthase beta chain (V-ATPase subunit B)                                                                                                                                                                                                                               |
| 91 | 963  | 0.03 | A0A1D3L579 | <i>Methanobacterium congolense</i> | Phosphoribosylformylglycinamide synthase subunit PurL (FGAM synthase) (EC 6.3.5.3) (Formylglycinamide ribonucleotide amidotransferase subunit II) (FGAR amidotransferase II) (FGAR-AT II) (Glutamine amidotransferase PurL) (Phosphoribosylformylglycinamide synthase subunit II) |
| 92 | 963  | 0.03 | A0A1D3L5J6 | <i>Methanobacterium congolense</i> | Acetolactate synthase (EC 2.2.1.6)                                                                                                                                                                                                                                                |
| 93 | 963  | 0.03 | A7I6H1     | <i>Methanoregula boonei</i>        | Glycyl-tRNA synthetase                                                                                                                                                                                                                                                            |
| 94 | 961  | 0.03 | A7I9N8     | <i>Methanoregula boonei</i>        | DNA-directed RNA polymerase (EC 2.7.7.6)                                                                                                                                                                                                                                          |
| 95 | 961  | 0.03 | L0HG76     | <i>Methanoregula formicica</i>     | CRISPR-associated helicase Cas3/CRISPR-associated endonuclease Cas3-HD                                                                                                                                                                                                            |

|     |     |      |            |                                    |                                                                                                                                                |
|-----|-----|------|------------|------------------------------------|------------------------------------------------------------------------------------------------------------------------------------------------|
| 96  | 959 | 0.03 | A0A1D3L2A8 | <i>Methanobacterium congolense</i> | Hydroxylamine reductase (EC 1.7.99.1) (Hybrid-cluster protein) (HCP) (Prismane protein)                                                        |
| 97  | 957 | 0.03 | A7I4V8     | <i>Methanoregula boonei</i>        | Translation initiation factor 2 subunit gamma (aIF2-gamma) (eIF-2-gamma)                                                                       |
| 98  | 955 | 0.03 | A7I7A6     | <i>Methanoregula boonei</i>        | Methyl-accepting chemotaxis sensory transducer                                                                                                 |
| 99  | 954 | 0.03 | A0A1D3L584 | <i>Methanobacterium congolense</i> | Uncharacterized protein                                                                                                                        |
| 100 | 953 | 0.03 | A7I5N0     | <i>Methanoregula boonei</i>        | AMP phosphorylase (AMPPase) (EC 2.4.2.57) (Nucleoside monophosphate phosphorylase) (NMP phosphorylase)                                         |
| 101 | 949 | 0.03 | A7I6S2     | <i>Methanoregula boonei</i>        | Acetate--CoA ligase                                                                                                                            |
| 102 | 947 | 0.03 | A7I4G8     | <i>Methanoregula boonei</i>        | Aspartate--tRNA(Asp/Asn) ligase (EC 6.1.1.23) (Aspartyl-tRNA synthetase) (AspRS) (Non-discriminating aspartyl-tRNA synthetase) (ND-AspRS)      |
| 103 | 938 | 0.03 | A7IAZ4     | <i>Methanoregula boonei</i>        | Peptidase S16, Lon-like protease (EC 3.4.21.53)                                                                                                |
| 104 | 937 | 0.03 | A0A1D3L0F2 | <i>Methanobacterium congolense</i> | Archaeal Lon protease (EC 3.4.21.-)                                                                                                            |
| 105 | 933 | 0.03 | A7I9N7     | <i>Methanoregula boonei</i>        | DNA-directed RNA polymerase subunit beta (EC 2.7.7.6)                                                                                          |
| 106 | 929 | 0.03 | A7I8P2     | <i>Methanoregula boonei</i>        | Phosphoesterase, RecJ domain protein                                                                                                           |
| 107 | 924 | 0.03 | A7I798     | <i>Methanoregula boonei</i>        | 60 kDa chaperonin (GroEL protein) (Protein Cpn60)                                                                                              |
| 108 | 921 | 0.03 | A0A1D3L5E6 | <i>Methanobacterium congolense</i> | Replication factor A                                                                                                                           |
| 109 | 919 | 0.03 | A7I7Z3     | <i>Methanoregula boonei</i>        | CheA signal transduction histidine kinase                                                                                                      |
| 110 | 913 | 0.03 | A7I5S6     | <i>Methanoregula boonei</i>        | Tetrahydromethanopterin S-methyltransferase subunit A (EC 2.1.1.86) (N5-methyltetrahydromethanopterin--coenzyme M methyltransferase subunit A) |
| 111 | 911 | 0.03 | A7IAJ6     | <i>Methanoregula boonei</i>        | DEAD/DEAH box helicase domain protein                                                                                                          |
| 112 | 906 | 0.03 | A0A1D3L5K7 | <i>Methanobacterium congolense</i> | Threonine--tRNA ligase (EC 6.1.1.3) (Threonyl-tRNA synthetase) (ThrRS)                                                                         |
| 113 | 903 | 0.03 | A7IAU5     | <i>Methanoregula boonei</i>        | Phosphoglycerate kinase (EC 2.7.2.3)                                                                                                           |
| 114 | 901 | 0.03 | A0A1D3L1G9 | <i>Methanobacterium congolense</i> | DNA helicase II related protein                                                                                                                |
| 115 | 901 | 0.03 | A0A1D3L4A4 | <i>Methanobacterium congolense</i> | Putative protease YrrO (EC 3.4.-.-)                                                                                                            |
| 116 | 899 | 0.03 | A0A1D3L1K6 | <i>Methanobacterium congolense</i> | Putative ATP-dependent helicase YprA (EC 3.6.4.-)                                                                                              |
| 117 | 899 | 0.03 | A7I7Z8     | <i>Methanoregula boonei</i>        | Type II secretion system protein                                                                                                               |
| 118 | 898 | 0.03 | A7IAG9     | <i>Methanoregula boonei</i>        | Enolase (EC 4.2.1.11) (2-phospho-D-glycerate hydro-lyase) (2-phosphoglycerate dehydratase)                                                     |
| 119 | 894 | 0.03 | A0A1D3L4X3 | <i>Methanobacterium congolense</i> | Archaeal glutamate synthase [NADPH] (EC 1.4.1.13)                                                                                              |
| 120 | 891 | 0.03 | A0A1D3L4D8 | <i>Methanobacterium congolense</i> | Pyruvate carboxylase subunit B (EC 6.4.1.1)                                                                                                    |
| 121 | 891 | 0.03 | A7I7B3     | <i>Methanoregula boonei</i>        | UvrABC system protein B (Protein UvrB) (Excinuclease ABC subunit B)                                                                            |
| 122 | 891 | 0.03 | A7I8Y8     | <i>Methanoregula boonei</i>        | AMP-dependent synthetase and ligase                                                                                                            |
| 123 | 889 | 0.03 | A0A1D3L598 | <i>Methanobacterium congolense</i> | Chaperone protein DnaK (HSP70) (Heat shock 70 kDa protein) (Heat shock protein 70)                                                             |
| 124 | 887 | 0.03 | E1RD00     | <i>Methanohalobium petrolearia</i> | Pyrrrolo-quinoline quinone                                                                                                                     |
| 125 | 884 | 0.03 | A7I464     | <i>Methanoregula boonei</i>        | ORC1-type DNA replication protein                                                                                                              |
| 126 | 883 | 0.03 | A0A1D3L430 | <i>Methanobacterium congolense</i> | Cell division cycle protein 48 homolog MJ1156                                                                                                  |
| 127 | 882 | 0.03 | A7I8Z2     | <i>Methanoregula boonei</i>        | Ammonium transporter                                                                                                                           |
| 128 | 881 | 0.03 | A7I4Y2     | <i>Methanoregula boonei</i>        | Arginine--tRNA ligase (EC 6.1.1.19) (Arginyl-tRNA synthetase) (ArgRS)                                                                          |



|     |     |      |            |                                    |                                                                                                                                                                                  |
|-----|-----|------|------------|------------------------------------|----------------------------------------------------------------------------------------------------------------------------------------------------------------------------------|
| 129 | 880 | 0.03 | A0A1D3L4R2 | <i>Methanobacterium congolense</i> | Cyanobacterial phytochrome A (EC 2.7.13.3)                                                                                                                                       |
| 130 | 880 | 0.03 | A0A1D3L5X1 | <i>Methanobacterium congolense</i> | Dihydroxy-acid dehydratase (DAD) (EC 4.2.1.9)                                                                                                                                    |
| 131 | 874 | 0.03 | A7I8Q2     | <i>Methanoregula boonei</i>        | AAA family ATPase, CDC48 subfamily (EC 3.6.4.6)                                                                                                                                  |
| 132 | 869 | 0.03 | A7I8B1     | <i>Methanoregula boonei</i>        | Polyphosphate kinase (EC 2.7.4.1) (ATP-polyphosphate phosphotransferase) (Polyphosphoric acid kinase)                                                                            |
| 133 | 866 | 0.03 | L0HHJ9     | <i>Methanoregula formicica</i>     | DNA gyrase subunit A (EC 5.99.1.3)                                                                                                                                               |
| 134 | 864 | 0.03 | A7I988     | <i>Methanoregula boonei</i>        | Acetyl-CoA carboxylase, biotin carboxylase                                                                                                                                       |
| 135 | 864 | 0.03 | E1RH76     | <i>Methanolacinia petrolearia</i>  | F420-dependent oxidoreductase, G6PDH family                                                                                                                                      |
| 136 | 863 | 0.03 | A0A1D3L1R0 | <i>Methanobacterium congolense</i> | Acetate-CoA ligase [ADP-forming] I (EC 6.2.1.13)                                                                                                                                 |
| 137 | 860 | 0.03 | A0A1D3L170 | <i>Methanobacterium congolense</i> | ATP-dependent DNA helicase Hel308 (EC 3.6.4.12)                                                                                                                                  |
| 138 | 858 | 0.03 | A7I6E6     | <i>Methanoregula boonei</i>        | Heavy metal translocating P-type ATPase                                                                                                                                          |
| 139 | 857 | 0.03 | A0A1D3L3V9 | <i>Methanobacterium congolense</i> | Putative KH and PIN-domain containing protein MJ1533                                                                                                                             |
| 140 | 854 | 0.03 | A0A1D3L407 | <i>Methanobacterium congolense</i> | Putative actinorhodin transporter                                                                                                                                                |
| 141 | 851 | 0.03 | A7IAE0     | <i>Methanoregula boonei</i>        | Serine hydroxymethyltransferase (SHMT) (Serine methylase) (EC 2.1.2.1)                                                                                                           |
| 142 | 851 | 0.03 | A7IAJ9     | <i>Methanoregula boonei</i>        | Carbamoyltransferase (EC 2.1.3.-)                                                                                                                                                |
| 143 | 850 | 0.03 | A0A1D3KZ36 | <i>Methanobacterium congolense</i> | O-phosphoserine--tRNA(Cys) ligase (O-phosphoserine--tRNA ligase) (EC 6.1.1.27) (Non-canonical O-phosphoseryl-tRNA(Cys) synthetase) (O-phosphoseryl-tRNA(Cys) synthetase) (SepRS) |
| 144 | 849 | 0.03 | A7I4C9     | <i>Methanoregula boonei</i>        | Acetate--CoA ligase                                                                                                                                                              |
| 145 | 849 | 0.03 | A7I6K0     | <i>Methanoregula boonei</i>        | Radical SAM domain protein                                                                                                                                                       |
| 146 | 846 | 0.03 | A0A1D3L3N4 | <i>Methanobacterium congolense</i> | Acetyl-coenzyme A synthetase (EC 6.2.1.1)                                                                                                                                        |
| 147 | 843 | 0.03 | A7IAY8     | <i>Methanoregula boonei</i>        | Type II secretion system protein                                                                                                                                                 |
| 148 | 843 | 0.03 | F4BZD0     | <i>Methanosaeta concilii</i>       | Transposase, putative                                                                                                                                                            |
| 149 | 840 | 0.03 | U6E9M3     | <i>Methanobacterium sp.</i>        | DNA-directed RNA polymerase subunit (EC 2.7.7.6)                                                                                                                                 |
| 150 | 839 | 0.03 | A0A101HE03 | <i>Methanobacterium sp.</i>        | WD40 domain protein beta Propeller                                                                                                                                               |
| 151 | 836 | 0.03 | A0A090I3J2 | <i>Methanobacterium formicicum</i> | Uncharacterized protein                                                                                                                                                          |
| 152 | 836 | 0.03 | A7IAM8     | <i>Methanoregula boonei</i>        | TrkA-N domain protein                                                                                                                                                            |
| 153 | 836 | 0.03 | E1RF47     | <i>Methanolacinia petrolearia</i>  | Ammonium transporter                                                                                                                                                             |
| 154 | 835 | 0.03 | A7IAB7     | <i>Methanoregula boonei</i>        | D-3-phosphoglycerate dehydrogenase (EC 1.1.1.95)                                                                                                                                 |
| 155 | 834 | 0.03 | A7I4R9     | <i>Methanoregula boonei</i>        | Sodium/hydrogen exchanger                                                                                                                                                        |
| 156 | 833 | 0.03 | A7IA07     | <i>Methanoregula boonei</i>        | Aminotransferase, class V                                                                                                                                                        |
| 157 | 832 | 0.03 | A0A1D3L551 | <i>Methanobacterium congolense</i> | Uncharacterized protein                                                                                                                                                          |
| 158 | 830 | 0.03 | A0A1D3L132 | <i>Methanobacterium congolense</i> | Putative pseudomurein-binding protein                                                                                                                                            |
| 159 | 830 | 0.03 | A7IAT4     | <i>Methanoregula boonei</i>        | Lysine--tRNA ligase (EC 6.1.1.6) (Lysyl-tRNA synthetase) (LysRS)                                                                                                                 |
| 160 | 829 | 0.03 | A7I842     | <i>Methanoregula boonei</i>        | Beta-lactamase domain protein                                                                                                                                                    |
| 161 | 825 | 0.02 | A0A1D3L3Z6 | <i>Methanobacterium congolense</i> | DNA replication licensing factor MCM7 (EC 3.6.4.12)                                                                                                                              |
| 162 | 823 | 0.02 | A0A1D3L4H2 | <i>Methanobacterium congolense</i> | Inner membrane protein YccS                                                                                                                                                      |

|     |     |      |            |                                    |                                                                                                                                                                                                                                                                                                                                |
|-----|-----|------|------------|------------------------------------|--------------------------------------------------------------------------------------------------------------------------------------------------------------------------------------------------------------------------------------------------------------------------------------------------------------------------------|
| 163 | 820 | 0.02 | A71696     | <i>Methanoregula boonei</i>        | Argininosuccinate lyase (ASAL) (EC 4.3.2.1) (Arginosuccinase)                                                                                                                                                                                                                                                                  |
| 164 | 819 | 0.02 | A0A089ZCJ0 | <i>Methanobacterium formicicum</i> | Cobalamin biosynthesis protein N (EC 6.6.1.2) (Cobaltochelataze CobN2)                                                                                                                                                                                                                                                         |
| 165 | 815 | 0.02 | A71415     | <i>Methanoregula boonei</i>        | UbiD family decarboxylase                                                                                                                                                                                                                                                                                                      |
| 166 | 815 | 0.02 | A71941     | <i>Methanoregula boonei</i>        | Type 2 DNA topoisomerase 6 subunit B (EC 5.99.1.3) (Type II DNA topoisomerase VI subunit B) (TopoVI-B)                                                                                                                                                                                                                         |
| 167 | 814 | 0.02 | A71498     | <i>Methanoregula boonei</i>        | DNA polymerase II small subunit (Pol II) (EC 2.7.7.7)                                                                                                                                                                                                                                                                          |
| 168 | 813 | 0.02 | AOA1D3KZK0 | <i>Methanobacterium congolense</i> | Glutamyl-tRNA(Gln) amidotransferase subunit E (Glu-ADT subunit E) (EC 6.3.5.-)                                                                                                                                                                                                                                                 |
| 169 | 812 | 0.02 | AOA1D3KZE7 | <i>Methanobacterium congolense</i> | Putative sensor histidine kinase pdtaS (EC 2.7.13.3)                                                                                                                                                                                                                                                                           |
| 170 | 812 | 0.02 | A71487     | <i>Methanoregula boonei</i>        | NADH dehydrogenase (Quinone) (EC 1.6.99.5)                                                                                                                                                                                                                                                                                     |
| 171 | 810 | 0.02 | A0A1D3L3Q6 | <i>Methanobacterium congolense</i> | Pyridoxal 5'-phosphate synthase subunit PdxS (PLP synthase subunit PdxS) (EC 4.3.3.6) (Pdx1)                                                                                                                                                                                                                                   |
| 172 | 806 | 0.02 | A0A1D3L1W6 | <i>Methanobacterium congolense</i> | Methionine--tRNA ligase (EC 6.1.1.10) (Methionyl-tRNA synthetase) (MetRS)                                                                                                                                                                                                                                                      |
| 173 | 806 | 0.02 | A71AF0     | <i>Methanoregula boonei</i>        | Major facilitator superfamily MFS_1                                                                                                                                                                                                                                                                                            |
| 174 | 806 | 0.02 | A71AV0     | <i>Methanoregula boonei</i>        | V-type ATP synthase subunit C (V-ATPase subunit C)                                                                                                                                                                                                                                                                             |
| 175 | 805 | 0.02 | A0A1D3KZX3 | <i>Methanobacterium congolense</i> | DNA-directed RNA polymerase subunit beta (EC 2.7.7.6)                                                                                                                                                                                                                                                                          |
| 176 | 803 | 0.02 | A0A1D3L3E8 | <i>Methanobacterium congolense</i> | Indolepyruvate oxidoreductase subunit IorA (IOR) (EC 1.2.7.8) (Indolepyruvate ferredoxin oxidoreductase subunit alpha)                                                                                                                                                                                                         |
| 177 | 803 | 0.02 | A0A1D3L5R3 | <i>Methanobacterium congolense</i> | Probable bifunctional tRNA threonylcarbamoyladenine biosynthesis protein [Includes: Serine/threonine-protein kinase Bud32 (EC 2.7.11.1); tRNA N6-adenosine threonylcarbamoyltransferase (EC 2.3.1.234) (tRNA threonylcarbamoyladenine biosynthesis protein Kae1) (t(6)A37 threonylcarbamoyladenine biosynthesis protein Kae1)] |
| 178 | 799 | 0.02 | A0A1D3KZ40 | <i>Methanobacterium congolense</i> | Fumarate reductase (CoM/CoB) subunit A                                                                                                                                                                                                                                                                                         |
| 179 | 798 | 0.02 | A0A1D3L5Q7 | <i>Methanobacterium congolense</i> | PAS domain S-box                                                                                                                                                                                                                                                                                                               |
| 180 | 798 | 0.02 | A717Z9     | <i>Methanoregula boonei</i>        | Type II secretion system protein E                                                                                                                                                                                                                                                                                             |
| 181 | 797 | 0.02 | A0A1D3KZQ9 | <i>Methanobacterium congolense</i> | Putative (R)-citramalate synthase CimA (EC 2.3.1.182)                                                                                                                                                                                                                                                                          |
| 182 | 795 | 0.02 | A0A1D3L4I5 | <i>Methanobacterium congolense</i> | Methyl-coenzyme M reductase I subunit beta (EC 2.8.4.1)                                                                                                                                                                                                                                                                        |
| 183 | 794 | 0.02 | A0A1D3L203 | <i>Methanobacterium congolense</i> | Uncharacterized protein                                                                                                                                                                                                                                                                                                        |
| 184 | 791 | 0.02 | A716C7     | <i>Methanoregula boonei</i>        | AMP-dependent synthetase and ligase                                                                                                                                                                                                                                                                                            |
| 185 | 790 | 0.02 | A0A1D3L2D6 | <i>Methanobacterium congolense</i> | Putative cadmium-transporting ATPase (EC 3.6.3.3)                                                                                                                                                                                                                                                                              |
| 186 | 790 | 0.02 | A0A1D3L2H5 | <i>Methanobacterium congolense</i> | tRNA-guanine(15) transglycosylase (EC 2.4.2.48) (7-cyano-7-deazaguanine tRNA-ribosyltransferase) (Archaeal tRNA-guanine transglycosylase)                                                                                                                                                                                      |
| 187 | 790 | 0.02 | A717L4     | <i>Methanoregula boonei</i>        | Chaperone protein DnaK (HSP70) (Heat shock 70 kDa protein) (Heat shock protein 70)                                                                                                                                                                                                                                             |
| 188 | 787 | 0.02 | A71989     | <i>Methanoregula boonei</i>        | Oxaloacetate decarboxylase alpha subunit                                                                                                                                                                                                                                                                                       |
| 189 | 785 | 0.02 | A71AG1     | <i>Methanoregula boonei</i>        | Glutamate--tRNA ligase (EC 6.1.1.17) (Glutamyl-tRNA synthetase) (GluRS)                                                                                                                                                                                                                                                        |
| 190 | 784 | 0.02 | A0A1D3L5S7 | <i>Methanobacterium congolense</i> | Uncharacterized protein                                                                                                                                                                                                                                                                                                        |
| 191 | 783 | 0.02 | A71931     | <i>Methanoregula boonei</i>        | GTP-binding protein, HSR1-related                                                                                                                                                                                                                                                                                              |
| 192 | 779 | 0.02 | A0A1D3L1R3 | <i>Methanobacterium congolense</i> | Putative sensor histidine kinase pdtaS (EC 2.7.13.3)                                                                                                                                                                                                                                                                           |

|     |     |      |            |                                    |                                                                                                                                                                                                                                                            |
|-----|-----|------|------------|------------------------------------|------------------------------------------------------------------------------------------------------------------------------------------------------------------------------------------------------------------------------------------------------------|
| 193 | 775 | 0.02 | A0A1D3L2V9 | <i>Methanobacterium congolense</i> | Uncharacterized protein                                                                                                                                                                                                                                    |
| 194 | 775 | 0.02 | A7I9L7     | <i>Methanoregula boonei</i>        | 4-vinyl reductase, 4VR                                                                                                                                                                                                                                     |
| 195 | 774 | 0.02 | A7I5U3     | <i>Methanoregula boonei</i>        | Methyl-coenzyme M reductase, beta subunit                                                                                                                                                                                                                  |
| 196 | 773 | 0.02 | A0A1D3L5B6 | <i>Methanobacterium congolense</i> | Helicase c2                                                                                                                                                                                                                                                |
| 197 | 773 | 0.02 | A7I4F0     | <i>Methanoregula boonei</i>        | Aspartokinase (EC 2.7.2.4)                                                                                                                                                                                                                                 |
| 198 | 773 | 0.02 | A7I9N5     | <i>Methanoregula boonei</i>        | DNA-directed RNA polymerase subunit A'' (EC 2.7.7.6)                                                                                                                                                                                                       |
| 199 | 771 | 0.02 | A0A1D3L452 | <i>Methanobacterium congolense</i> | DNA topoisomerase 1 (EC 5.99.1.2) (DNA topoisomerase I)                                                                                                                                                                                                    |
| 200 | 769 | 0.02 | A0A1D3L412 | <i>Methanobacterium congolense</i> | Putative MFS-type transporter YusP                                                                                                                                                                                                                         |
| 201 | 768 | 0.02 | A0A090I3X0 | <i>Methanobacterium formicicum</i> | Nitrogenase protein alpha chain (EC 1.18.6.1)                                                                                                                                                                                                              |
| 202 | 768 | 0.02 | A0A1D3KZR8 | <i>Methanobacterium congolense</i> | DNA ligase (EC 6.5.1.1) (Polydeoxyribonucleotide synthase [ATP])                                                                                                                                                                                           |
| 203 | 765 | 0.02 | A0A1D3L5K9 | <i>Methanobacterium congolense</i> | Uncharacterized protein                                                                                                                                                                                                                                    |
| 204 | 764 | 0.02 | A0A1D3L0A6 | <i>Methanobacterium congolense</i> | Putative acyl-CoA synthetase YngI (EC 6.2.1.-)                                                                                                                                                                                                             |
| 205 | 763 | 0.02 | A0A1D3L4R1 | <i>Methanobacterium congolense</i> | V-type ATP synthase alpha chain (EC 3.6.3.14) (V-ATPase subunit A)                                                                                                                                                                                         |
| 206 | 762 | 0.02 | A7I822     | <i>Methanoregula boonei</i>        | K+ potassium transporter                                                                                                                                                                                                                                   |
| 207 | 762 | 0.02 | A7I9I5     | <i>Methanoregula boonei</i>        | Anaerobic ribonucleoside-triphosphate reductase                                                                                                                                                                                                            |
| 208 | 758 | 0.02 | A7I648     | <i>Methanoregula boonei</i>        | Uncharacterized protein                                                                                                                                                                                                                                    |
| 209 | 757 | 0.02 | A0A1D3L223 | <i>Methanobacterium congolense</i> | CoB-CoM heterodisulfide reductase 1 iron-sulfur subunit A (EC 1.8.98.1)                                                                                                                                                                                    |
| 210 | 756 | 0.02 | A7I4W3     | <i>Methanoregula boonei</i>        | Glutamine--fructose-6-phosphate aminotransferase [isomerizing] (EC 2.6.1.16) (D-fructose-6-phosphate amidotransferase) (GFAT) (Glucosamine-6-phosphate synthase) (Hexosephosphate aminotransferase) (L-glutamine--D-fructose-6-phosphate amidotransferase) |
| 211 | 755 | 0.02 | A7I9C0     | <i>Methanoregula boonei</i>        | Pyruvate carboxyltransferase                                                                                                                                                                                                                               |
| 212 | 752 | 0.02 | A0A1D3L4A8 | <i>Methanobacterium congolense</i> | Uncharacterized protein                                                                                                                                                                                                                                    |
| 213 | 752 | 0.02 | F6D827     | <i>Methanobacterium paludis</i>    | Formylmethanofuran dehydrogenase subunit B (EC 1.2.99.5)                                                                                                                                                                                                   |
| 214 | 751 | 0.02 | A7I4K8     | <i>Methanoregula boonei</i>        | Amino acid permease-associated region                                                                                                                                                                                                                      |
| 215 | 750 | 0.02 | A0A1D3L1A5 | <i>Methanobacterium congolense</i> | Acetyl-coenzyme A synthetase (EC 6.2.1.1)                                                                                                                                                                                                                  |
| 216 | 750 | 0.02 | A0A1D3L4J0 | <i>Methanobacterium congolense</i> | Phage infection protein                                                                                                                                                                                                                                    |
| 217 | 749 | 0.02 | A0A1D3L2M9 | <i>Methanobacterium congolense</i> | Phenylalanine--tRNA ligase beta subunit (EC 6.1.1.20) (Phenylalanyl-tRNA synthetase beta subunit) (PheRS)                                                                                                                                                  |
| 218 | 749 | 0.02 | A0A1D3L5K4 | <i>Methanobacterium congolense</i> | Uncharacterized protein                                                                                                                                                                                                                                    |
| 219 | 746 | 0.02 | A0A1D3L0R9 | <i>Methanobacterium congolense</i> | Catalase-peroxidase (CP) (EC 1.11.1.21) (Peroxidase/catalase)                                                                                                                                                                                              |
| 220 | 746 | 0.02 | A0A1D3L369 | <i>Methanobacterium congolense</i> | Transposase                                                                                                                                                                                                                                                |
| 221 | 746 | 0.02 | F4BY05     | <i>Methanosaeta concilii</i>       | Transposase, IS116/IS110/IS902 family                                                                                                                                                                                                                      |
| 222 | 744 | 0.02 | A7I4Y1     | <i>Methanoregula boonei</i>        | Peptide chain release factor subunit 1 (Translation termination factor aRF1)                                                                                                                                                                               |
| 223 | 743 | 0.02 | A7I6I7     | <i>Methanoregula boonei</i>        | Adenosylhomocysteinase (EC 3.3.1.1)                                                                                                                                                                                                                        |
| 224 | 742 | 0.02 | A7I841     | <i>Methanoregula boonei</i>        | Putative CoA-substrate-specific enzyme activase                                                                                                                                                                                                            |
| 225 | 741 | 0.02 | K2R0T8     | <i>Methanobacterium formicicum</i> | DNA-directed RNA polymerase subunit (EC 2.7.7.6)                                                                                                                                                                                                           |

|     |     |      |            |                                    |                                                                                                                                                                                                                                                                                   |
|-----|-----|------|------------|------------------------------------|-----------------------------------------------------------------------------------------------------------------------------------------------------------------------------------------------------------------------------------------------------------------------------------|
| 226 | 740 | 0.02 | A0A1D3KZW0 | <i>Methanobacterium congolense</i> | Putative ABC transporter ATP-binding protein MJ1242                                                                                                                                                                                                                               |
| 227 | 740 | 0.02 | A0A1D3L5S0 | <i>Methanobacterium congolense</i> | Arginine--tRNA ligase (EC 6.1.1.19) (Arginyl-tRNA synthetase) (ArgRS)                                                                                                                                                                                                             |
| 228 | 740 | 0.02 | A7I667     | <i>Methanoregula boonei</i>        | Phenylacetate--CoA ligase                                                                                                                                                                                                                                                         |
| 229 | 739 | 0.02 | A7I4B9     | <i>Methanoregula boonei</i>        | Aminotransferase (EC 2.6.1.-)                                                                                                                                                                                                                                                     |
| 230 | 738 | 0.02 | A0A1D3L153 | <i>Methanobacterium congolense</i> | Uncharacterized protein                                                                                                                                                                                                                                                           |
| 231 | 738 | 0.02 | A7I7Y9     | <i>Methanoregula boonei</i>        | ABC transporter related                                                                                                                                                                                                                                                           |
| 232 | 737 | 0.02 | L0HFP5     | <i>Methanoregula formicica</i>     | Magnesium chelatase, H subunit                                                                                                                                                                                                                                                    |
| 233 | 736 | 0.02 | U6EA67     | <i>Methanobacterium sp.</i>        | Uncharacterized protein                                                                                                                                                                                                                                                           |
| 234 | 735 | 0.02 | A7I5L0     | <i>Methanoregula boonei</i>        | Indolepyruvate oxidoreductase subunit IorA (IOR) (EC 1.2.7.8) (Indolepyruvate ferredoxin oxidoreductase subunit alpha)                                                                                                                                                            |
| 235 | 735 | 0.02 | A7I859     | <i>Methanoregula boonei</i>        | Uncharacterized protein                                                                                                                                                                                                                                                           |
| 236 | 734 | 0.02 | A0A1D3L2F4 | <i>Methanobacterium congolense</i> | Inosine-5'-monophosphate dehydrogenase (IMP dehydrogenase) (IMPD) (IMPDH) (EC 1.1.1.205)                                                                                                                                                                                          |
| 237 | 733 | 0.02 | A0A1D3L103 | <i>Methanobacterium congolense</i> | Ferrous iron transport protein B                                                                                                                                                                                                                                                  |
| 238 | 730 | 0.02 | A7I5H9     | <i>Methanoregula boonei</i>        | Phosphoribosylformylglycinamide synthase subunit PurL (FGAM synthase) (EC 6.3.5.3) (Formylglycinamide ribonucleotide amidotransferase subunit II) (FGAR amidotransferase II) (FGAR-AT II) (Glutamine amidotransferase PurL) (Phosphoribosylformylglycinamide synthase subunit II) |
| 239 | 728 | 0.02 | A0A1D3L094 | <i>Methanobacterium congolense</i> | Magnesium-chelatase subunit ChII homolog                                                                                                                                                                                                                                          |
| 240 | 728 | 0.02 | A0A1D3L3V1 | <i>Methanobacterium congolense</i> | Cyanobacterial phytochrome A (EC 2.7.13.3)                                                                                                                                                                                                                                        |
| 241 | 727 | 0.02 | A0A1D3L0U2 | <i>Methanobacterium congolense</i> | Archaeal glutamate synthase [NADPH] (EC 1.4.1.13)                                                                                                                                                                                                                                 |
| 242 | 726 | 0.02 | A0A1D3L4N1 | <i>Methanobacterium congolense</i> | Type-2 serine--tRNA ligase (EC 6.1.1.11) (Seryl-tRNA synthetase) (SerRS) (Seryl-tRNA(Ser/Sec) synthetase)                                                                                                                                                                         |
| 243 | 725 | 0.02 | A0A1D3L0Z3 | <i>Methanobacterium congolense</i> | Thermosome subunit beta                                                                                                                                                                                                                                                           |
| 244 | 725 | 0.02 | A0A1D3L2G6 | <i>Methanobacterium congolense</i> | Methyl sulfide methyltransferase-associated sensor (EC 2.7.13.3)                                                                                                                                                                                                                  |
| 245 | 724 | 0.02 | A7I666     | <i>Methanoregula boonei</i>        | Phenylacetate--CoA ligase (EC 6.2.1.30)                                                                                                                                                                                                                                           |
| 246 | 723 | 0.02 | A0A1D3L504 | <i>Methanobacterium congolense</i> | DNA polymerase (EC 2.7.7.7)                                                                                                                                                                                                                                                       |
| 247 | 722 | 0.02 | A0A1D3KZW8 | <i>Methanobacterium congolense</i> | Uncharacterized protein                                                                                                                                                                                                                                                           |
| 248 | 722 | 0.02 | A0A1D3L0K8 | <i>Methanobacterium congolense</i> | Glutamine--fructose-6-phosphate aminotransferase [isomerizing] (EC 2.6.1.16) (D-fructose-6-phosphate amidotransferase) (GFAT) (Glucosamine-6-phosphate synthase) (Hexosephosphate aminotransferase) (L-glutamine--D-fructose-6-phosphate amidotransferase)                        |
| 249 | 719 | 0.02 | A0A1D3L3Z3 | <i>Methanobacterium congolense</i> | Putative ABC transporter ATP-binding protein MJ0719                                                                                                                                                                                                                               |
| 250 | 718 | 0.02 | A0A1D3L2V1 | <i>Methanobacterium congolense</i> | Uncharacterized protein                                                                                                                                                                                                                                                           |
| 251 | 717 | 0.02 | A7I8Y7     | <i>Methanoregula boonei</i>        | AMP-dependent synthetase and ligase                                                                                                                                                                                                                                               |
| 252 | 716 | 0.02 | A0A1D3KZT8 | <i>Methanobacterium congolense</i> | Acyl-coenzyme A synthetase ACSM3, mitochondrial (EC 6.2.1.2)                                                                                                                                                                                                                      |
| 253 | 716 | 0.02 | A0A1D3L1D7 | <i>Methanobacterium congolense</i> | Uncharacterized protein                                                                                                                                                                                                                                                           |
| 254 | 714 | 0.02 | A0A1D3L1V6 | <i>Methanobacterium congolense</i> | Uncharacterized protein                                                                                                                                                                                                                                                           |

|     |     |      |            |                                    |                                                                                                                                                                                                                                                      |
|-----|-----|------|------------|------------------------------------|------------------------------------------------------------------------------------------------------------------------------------------------------------------------------------------------------------------------------------------------------|
| 255 | 714 | 0.02 | A714G3     | <i>Methanoregula boonei</i>        | AMP-dependent synthetase and ligase                                                                                                                                                                                                                  |
| 256 | 713 | 0.02 | A718Z7     | <i>Methanoregula boonei</i>        | Archaeal glutamate synthase [NADPH] (EC 1.4.1.13)                                                                                                                                                                                                    |
| 257 | 712 | 0.02 | A0A1D3L3S1 | <i>Methanobacterium congolense</i> | Archaeal glutamate synthase [NADPH] (EC 1.4.1.13)                                                                                                                                                                                                    |
| 258 | 712 | 0.02 | L0HEU5     | <i>Methanoregula formicica</i>     | DNA gyrase subunit B (EC 5.99.1.3)                                                                                                                                                                                                                   |
| 259 | 711 | 0.02 | A0A1D3L117 | <i>Methanobacterium congolense</i> | Uncharacterized protein                                                                                                                                                                                                                              |
| 260 | 710 | 0.02 | A715J3     | <i>Methanoregula boonei</i>        | AAA ATPase, central domain protein                                                                                                                                                                                                                   |
| 261 | 709 | 0.02 | A0A1D3L5G6 | <i>Methanobacterium congolense</i> | DNA polymerase II small subunit (Pol II) (EC 2.7.7.7)                                                                                                                                                                                                |
| 262 | 709 | 0.02 | A716C9     | <i>Methanoregula boonei</i>        | Bifunctional enzyme Fae/Hps [Includes: 5,6,7,8-tetrahydromethanopterin hydro-lyase (EC 4.2.1.147) (Formaldehyde-activating enzyme) (Fae); 3-hexulose-6-phosphate synthase (HPS) (EC 4.1.2.43) (D-arabino-3-hexulose-6-phosphate formaldehyde lyase)] |
| 263 | 709 | 0.02 | A715I7     | <i>Methanoregula boonei</i>        | GTP cyclohydrolase MptA (EC 3.5.4.39) (GTP cyclohydrolase IV)                                                                                                                                                                                        |
| 264 | 708 | 0.02 | A0A1D3L230 | <i>Methanobacterium congolense</i> | UvrABC system protein B (Protein UvrB) (Excinuclease ABC subunit B)                                                                                                                                                                                  |
| 265 | 708 | 0.02 | A716J4     | <i>Methanoregula boonei</i>        | Uncharacterized protein                                                                                                                                                                                                                              |
| 266 | 707 | 0.02 | A0A1D3L4H3 | <i>Methanobacterium congolense</i> | V-type ATP synthase subunit I                                                                                                                                                                                                                        |
| 267 | 707 | 0.02 | A0A1D3L537 | <i>Methanobacterium congolense</i> | Uncharacterized protein                                                                                                                                                                                                                              |
| 268 | 707 | 0.02 | A714B6     | <i>Methanoregula boonei</i>        | Aminotransferase, class V                                                                                                                                                                                                                            |
| 269 | 707 | 0.02 | A714R6     | <i>Methanoregula boonei</i>        | Pyruvate flavodoxin/ferredoxin oxidoreductase domain protein                                                                                                                                                                                         |
| 270 | 705 | 0.02 | L0HD61     | <i>Methanoregula formicica</i>     | Coenzyme F420-reducing hydrogenase, beta subunit                                                                                                                                                                                                     |
| 271 | 704 | 0.02 | A71922     | <i>Methanoregula boonei</i>        | Inosine-5'-monophosphate dehydrogenase (IMP dehydrogenase) (IMPD) (IMPDH) (EC 1.1.1.205)                                                                                                                                                             |
| 272 | 702 | 0.02 | A0A1D3KZ91 | <i>Methanobacterium congolense</i> | Putative glutamine amidotransferase-like protein MJ0138                                                                                                                                                                                              |
| 273 | 701 | 0.02 | A717B2     | <i>Methanoregula boonei</i>        | Ribulose bisphosphate carboxylase (RuBisCO) (EC 4.1.1.39)                                                                                                                                                                                            |
| 274 | 700 | 0.02 | A0A1D3L514 | <i>Methanobacterium congolense</i> | GTP-binding protein 1                                                                                                                                                                                                                                |
| 275 | 699 | 0.02 | A0A1D3L3P1 | <i>Methanobacterium congolense</i> | Probable translation initiation factor IF-2                                                                                                                                                                                                          |
| 276 | 698 | 0.02 | A719L0     | <i>Methanoregula boonei</i>        | Type II secretion system protein E                                                                                                                                                                                                                   |
| 277 | 696 | 0.02 | A0A1D3L078 | <i>Methanobacterium congolense</i> | DEAD-box ATP-dependent RNA helicase CshA (EC 3.6.4.13)                                                                                                                                                                                               |
| 278 | 696 | 0.02 | A717F4     | <i>Methanoregula boonei</i>        | Nitrogenase MoFe cofactor biosynthesis protein Nife (EC 1.18.6.1)                                                                                                                                                                                    |
| 279 | 696 | 0.02 | A71B58     | <i>Methanoregula boonei</i>        | Tyrosine--tRNA ligase (EC 6.1.1.1) (Tyrosyl-tRNA synthetase) (TyrRS)                                                                                                                                                                                 |
| 280 | 693 | 0.02 | A0A1D3L5L1 | <i>Methanobacterium congolense</i> | Multidrug resistance protein Stp                                                                                                                                                                                                                     |
| 281 | 693 | 0.02 | B8GJD9     | <i>Methanosphaerula palustris</i>  | Ferrous iron transport protein B                                                                                                                                                                                                                     |
| 282 | 693 | 0.02 | F6D828     | <i>Methanobacterium paludis</i>    | Formylmethanofuran dehydrogenase subunit A                                                                                                                                                                                                           |
| 283 | 692 | 0.02 | A715T0     | <i>Methanoregula boonei</i>        | Tetrahydromethanopterin S-methyltransferase subunit E (EC 2.1.1.86) (N5-methyltetrahydromethanopterin--coenzyme M methyltransferase subunit E)                                                                                                       |
| 284 | 692 | 0.02 | L0HHJ6     | <i>Methanoregula formicica</i>     | Tubulin-like protein CetZ                                                                                                                                                                                                                            |
| 285 | 692 | 0.02 | A715N9     | <i>Methanoregula boonei</i>        | 50S ribosomal protein L3                                                                                                                                                                                                                             |
| 286 | 690 | 0.02 | A0A1D3KZ99 | <i>Methanobacterium congolense</i> | Lysine--tRNA ligase (EC 6.1.1.6) (Lysyl-tRNA synthetase) (LysRS)                                                                                                                                                                                     |
| 287 | 690 | 0.02 | A0A1D3L4T1 | <i>Methanobacterium congolense</i> | Homoserine dehydrogenase (EC 1.1.1.3)                                                                                                                                                                                                                |

|     |     |      |            |                                    |                                                                                                    |
|-----|-----|------|------------|------------------------------------|----------------------------------------------------------------------------------------------------|
| 288 | 689 | 0.02 | A0A1D3KZT0 | <i>Methanobacterium congolense</i> | Adenine deaminase (Adenase) (Adenine aminase) (EC 3.5.4.2)                                         |
| 289 | 689 | 0.02 | A7I6G3     | <i>Methanoregula boonei</i>        | Sodium/hydrogen exchanger                                                                          |
| 290 | 689 | 0.02 | P06130     | <i>Methanobacterium formicicum</i> | Formate dehydrogenase subunit beta (EC 1.2.1.2)                                                    |
| 291 | 688 | 0.02 | A7I940     | <i>Methanoregula boonei</i>        | Histidine--tRNA ligase (EC 6.1.1.21) (Histidyl-tRNA synthetase) (HisRS)                            |
| 292 | 687 | 0.02 | A0A1D3L220 | <i>Methanobacterium congolense</i> | Uncharacterized protein                                                                            |
| 293 | 687 | 0.02 | A7I654     | <i>Methanoregula boonei</i>        | Glycosyl transferase, family 39                                                                    |
| 294 | 686 | 0.02 | A0A1D3L2Q0 | <i>Methanobacterium congolense</i> | Glutamate--tRNA ligase (EC 6.1.1.17) (Glutamyl-tRNA synthetase) (GluRS)                            |
| 295 | 686 | 0.02 | L0HF89     | <i>Methanoregula formicica</i>     | Formylmethanofuran dehydrogenase subunit B                                                         |
| 296 | 685 | 0.02 | A7I4T9     | <i>Methanoregula boonei</i>        | Anthranilate synthase component 1 (EC 4.1.3.27)                                                    |
| 297 | 684 | 0.02 | A0A1D3KZR9 | <i>Methanobacterium congolense</i> | Putative PAS/PAC sensor protein                                                                    |
| 298 | 684 | 0.02 | A0A1D3KZS3 | <i>Methanobacterium congolense</i> | Ketoisovalerate oxidoreductase subunit VorA (EC 1.-.-.-)                                           |
| 299 | 684 | 0.02 | A7IA49     | <i>Methanoregula boonei</i>        | Aminotransferase, class I and II                                                                   |
| 300 | 684 | 0.02 | A7IAK3     | <i>Methanoregula boonei</i>        | 50S ribosomal protein L10 (Acidic ribosomal protein P0 homolog)                                    |
| 301 | 683 | 0.02 | A7IA50     | <i>Methanoregula boonei</i>        | Diaminopimelate decarboxylase (DAP decarboxylase) (DAPDC) (EC 4.1.1.20)                            |
| 302 | 681 | 0.02 | A0A1D3L1B1 | <i>Methanobacterium congolense</i> | Putative LRR receptor-like serine/threonine-protein kinase At1g06840 (EC 2.7.11.1)                 |
| 303 | 678 | 0.02 | A7I890     | <i>Methanoregula boonei</i>        | Serine--tRNA ligase (EC 6.1.1.11) (Seryl-tRNA synthetase) (SerRS) (Seryl-tRNA(Ser/Sec) synthetase) |
| 304 | 676 | 0.02 | A0A1D3L1Q0 | <i>Methanobacterium congolense</i> | Thermosome subunit alpha                                                                           |
| 305 | 676 | 0.02 | A0A1D3L5T8 | <i>Methanobacterium congolense</i> | Putative transporter YebQ                                                                          |
| 306 | 674 | 0.02 | A7I754     | <i>Methanoregula boonei</i>        | Homospermidine synthase (EC 2.5.1.44)                                                              |
| 307 | 673 | 0.02 | A0A1D3L3L2 | <i>Methanobacterium congolense</i> | Putative iron-sulfur protein MMP1067                                                               |
| 308 | 673 | 0.02 | A7I861     | <i>Methanoregula boonei</i>        | Cell division protein FtsZ                                                                         |
| 309 | 673 | 0.02 | A7IAL8     | <i>Methanoregula boonei</i>        | Cell division protein FtsZ                                                                         |
| 310 | 671 | 0.02 | A0A1D3L4J5 | <i>Methanobacterium congolense</i> | Uncharacterized protein                                                                            |
| 311 | 670 | 0.02 | A0A1D3L4L0 | <i>Methanobacterium congolense</i> | Uncharacterized protein                                                                            |
| 312 | 670 | 0.02 | A7I9I1     | <i>Methanoregula boonei</i>        | Signal recognition particle 54 kDa protein (SRP54)                                                 |
| 313 | 669 | 0.02 | A7I7K0     | <i>Methanoregula boonei</i>        | Ferredoxin                                                                                         |
| 314 | 669 | 0.02 | A7I9F2     | <i>Methanoregula boonei</i>        | Small GTP-binding protein                                                                          |
| 315 | 667 | 0.02 | A0A1D3L3I1 | <i>Methanobacterium congolense</i> | Glycine-tRNA ligase (EC 6.1.1.14)                                                                  |
| 316 | 664 | 0.02 | A0A1D3L2K6 | <i>Methanobacterium congolense</i> | Uncharacterized protein                                                                            |
| 317 | 664 | 0.02 | A0A1D3L4V1 | <i>Methanobacterium congolense</i> | Uncharacterized protein                                                                            |
| 318 | 664 | 0.02 | A7I7F3     | <i>Methanoregula boonei</i>        | Nitrogenase molybdenum-iron protein beta chain (EC 1.18.6.1)                                       |
| 319 | 663 | 0.02 | A0A1D3L3K7 | <i>Methanobacterium congolense</i> | Uncharacterised protein family (UPF0240)                                                           |
| 320 | 663 | 0.02 | L0HI79     | <i>Methanoregula formicica</i>     | CRISPR-associated protein Cas8c/Csd1, subtype I-C/DVULG                                            |
| 321 | 663 | 0.02 | L0HKB8     | <i>Methanoregula formicica</i>     | Uncharacterized protein                                                                            |
| 322 | 660 | 0.02 | A0A1D3KZ83 | <i>Methanobacterium congolense</i> | Adenylosuccinate lyase (ASL) (EC 4.3.2.2) (Adenylosuccinase)                                       |

|     |     |      |            |                                    |                                                                                                                                                                                                            |
|-----|-----|------|------------|------------------------------------|------------------------------------------------------------------------------------------------------------------------------------------------------------------------------------------------------------|
| 323 | 659 | 0.02 | A0A1D3KZD9 | <i>Methanobacterium congolense</i> | Uncharacterized protein                                                                                                                                                                                    |
| 324 | 659 | 0.02 | A7I6T4     | <i>Methanoregula boonei</i>        | Plasma-membrane proton-efflux P-type ATPase                                                                                                                                                                |
| 325 | 659 | 0.02 | A7I9A2     | <i>Methanoregula boonei</i>        | Protein-export membrane protein SecD                                                                                                                                                                       |
| 326 | 658 | 0.02 | A0A1D3L546 | <i>Methanobacterium congolense</i> | Multifunctional fusion protein [Includes: ADP-dependent (S)-NAD(P)H-hydrate dehydratase (EC 4.2.1.136) (ADP-dependent NAD(P)HX dehydratase); NAD(P)H-hydrate epimerase (EC 5.1.99.6) (NAD(P)HX epimerase)] |
| 327 | 657 | 0.02 | A0A1D3L0K7 | <i>Methanobacterium congolense</i> | Digeranylgeranyl glycerophospholipid reductase (DGGGPL reductase) (EC 1.3.7.11) (2,3-bis-O-geranylgeranyl glyceryl phosphate reductase) (Geranylgeranyl reductase) (GGR)                                   |
| 328 | 657 | 0.02 | A0A1D3L5T3 | <i>Methanobacterium congolense</i> | Phosphoribosylamine--glycine ligase (EC 6.3.4.13) (GARS) (Glycinamide ribonucleotide synthetase) (Phosphoribosylglycinamide synthetase)                                                                    |
| 329 | 657 | 0.02 | A7I8Z5     | <i>Methanoregula boonei</i>        | Glutamine synthetase (EC 6.3.1.2)                                                                                                                                                                          |
| 330 | 655 | 0.02 | A0A1D3L5A3 | <i>Methanobacterium congolense</i> | Coenzyme F420 hydrogenase subunit alpha (EC 1.12.98.1)                                                                                                                                                     |
| 331 | 654 | 0.02 | A7I630     | <i>Methanoregula boonei</i>        | Pyruvate flavodoxin/ferredoxin oxidoreductase domain protein                                                                                                                                               |
| 332 | 653 | 0.02 | A7I5V0     | <i>Methanoregula boonei</i>        | Formylmethanofuran--tetrahydromethanopterin formyltransferase (EC 2.3.1.101) (H4MPT formyltransferase)                                                                                                     |
| 333 | 652 | 0.02 | A0A1D3L2W2 | <i>Methanobacterium congolense</i> | Ribonuclease J (RNase J) (EC 3.1.-.-)                                                                                                                                                                      |
| 334 | 650 | 0.02 | A0A1D3KZN6 | <i>Methanobacterium congolense</i> | Global nitrogen regulator NrpR                                                                                                                                                                             |
| 335 | 650 | 0.02 | A0A1D3L065 | <i>Methanobacterium congolense</i> | Multidrug export protein EmrB                                                                                                                                                                              |
| 336 | 649 | 0.02 | A0A1D3L563 | <i>Methanobacterium congolense</i> | Putative cysteine desulfurase (EC 2.8.1.7)                                                                                                                                                                 |
| 337 | 649 | 0.02 | A0A1D3L5D6 | <i>Methanobacterium congolense</i> | Uncharacterized protein                                                                                                                                                                                    |
| 338 | 647 | 0.02 | A0A1D3L4I8 | <i>Methanobacterium congolense</i> | Polyferredoxin protein MvhB                                                                                                                                                                                |
| 339 | 646 | 0.02 | A0A1D3KZI2 | <i>Methanobacterium congolense</i> | Probable tRNA pseudouridine synthase D (EC 5.4.99.27) (tRNA pseudouridine(13) synthase) (tRNA pseudouridylylate synthase D) (tRNA-uridine isomerase D)                                                     |
| 340 | 645 | 0.02 | A0A1D3KZS6 | <i>Methanobacterium congolense</i> | O-phospho-L-seryl-tRNA:Cys-tRNA synthase (EC 2.5.1.73) (Sep-tRNA:Cys-tRNA synthase) (SepCysS)                                                                                                              |
| 341 | 645 | 0.02 | A0A1D3L5K3 | <i>Methanobacterium congolense</i> | Putative NADH oxidase (EC 1.6.99.3)                                                                                                                                                                        |
| 342 | 645 | 0.02 | A7I4I6     | <i>Methanoregula boonei</i>        | Uncharacterized protein                                                                                                                                                                                    |
| 343 | 645 | 0.02 | A7I5Z2     | <i>Methanoregula boonei</i>        | Uncharacterized protein                                                                                                                                                                                    |
| 344 | 644 | 0.02 | A0A1D3L0E2 | <i>Methanobacterium congolense</i> | Uncharacterized protein                                                                                                                                                                                    |
| 345 | 644 | 0.02 | A0A1D3L3U3 | <i>Methanobacterium congolense</i> | DNA-binding protein MutS2                                                                                                                                                                                  |
| 346 | 644 | 0.02 | A7I5X5     | <i>Methanoregula boonei</i>        | Uncharacterized protein                                                                                                                                                                                    |
| 347 | 644 | 0.02 | A7I7G8     | <i>Methanoregula boonei</i>        | Anti-sigma-factor antagonist                                                                                                                                                                               |
| 348 | 643 | 0.02 | A0A1D3KZ76 | <i>Methanobacterium congolense</i> | Putative 2-isopropylmalate synthase (EC 2.3.3.13)                                                                                                                                                          |
| 349 | 643 | 0.02 | A7I8A0     | <i>Methanoregula boonei</i>        | Acetolactate synthase (EC 2.2.1.6)                                                                                                                                                                         |
| 350 | 642 | 0.02 | A0A1D3KZK6 | <i>Methanobacterium congolense</i> | Glutamate decarboxylase (EC 4.1.1.15)                                                                                                                                                                      |

|     |     |      |            |                                    |                                                                                                                                                                                             |
|-----|-----|------|------------|------------------------------------|---------------------------------------------------------------------------------------------------------------------------------------------------------------------------------------------|
| 351 | 640 | 0.02 | A7I6L5     | <i>Methanoregula boonei</i>        | Aspartyl/glutamyl-tRNA(Asn/Gln) amidotransferase subunit B (Asp/Glu-ADT subunit B) (EC 6.3.5.-)                                                                                             |
| 352 | 639 | 0.02 | A0A1D3L102 | <i>Methanobacterium congolense</i> | Putative membrane protein YabM                                                                                                                                                              |
| 353 | 639 | 0.02 | A0A1D3L5F2 | <i>Methanobacterium congolense</i> | Diaminopimelate decarboxylase (DAP decarboxylase) (DAPDC) (EC 4.1.1.20)                                                                                                                     |
| 354 | 638 | 0.02 | A0A1D3KZ90 | <i>Methanobacterium congolense</i> | Phosphomethylpyrimidine synthase (EC 4.1.99.17) (Hydroxymethylpyrimidine phosphate synthase) (HMP-P synthase) (HMP-phosphate synthase) (HMPP synthase) (Thiamine biosynthesis protein ThiC) |
| 355 | 638 | 0.02 | A0A1D3KZA6 | <i>Methanobacterium congolense</i> | Phenylacetate-coenzyme A ligase (EC 6.2.1.30)                                                                                                                                               |
| 356 | 638 | 0.02 | A0A1D3L3E2 | <i>Methanobacterium congolense</i> | Putative sensor histidine kinase pdtaS (EC 2.7.13.3)                                                                                                                                        |
| 357 | 637 | 0.02 | A0A1D3L0A1 | <i>Methanobacterium congolense</i> | UDP-N-acetylmuramoyl-L-alanyl-D-glutamate-2,6-diaminopimelate ligase (EC 6.3.2.13)                                                                                                          |
| 358 | 637 | 0.02 | A7I6N3     | <i>Methanoregula boonei</i>        | Amidohydrolase 3                                                                                                                                                                            |
| 359 | 636 | 0.02 | A7I4C2     | <i>Methanoregula boonei</i>        | Uncharacterized protein                                                                                                                                                                     |
| 360 | 636 | 0.02 | A7IAT1     | <i>Methanoregula boonei</i>        | Uncharacterized protein                                                                                                                                                                     |
| 361 | 635 | 0.02 | A0A1D3L3M7 | <i>Methanobacterium congolense</i> | Putative glycosyltransferase YfnE (EC 2.4.-.-)                                                                                                                                              |
| 362 | 635 | 0.02 | A0A1D3L571 | <i>Methanobacterium congolense</i> | Serine hydroxymethyltransferase (SHMT) (Serine methylase) (EC 2.1.2.-)                                                                                                                      |
| 363 | 635 | 0.02 | A0A1D3L5B2 | <i>Methanobacterium congolense</i> | Putative polyferredoxin-like protein MJ1303                                                                                                                                                 |
| 364 | 634 | 0.02 | A0A1D3L1I3 | <i>Methanobacterium congolense</i> | Uncharacterized protein                                                                                                                                                                     |
| 365 | 633 | 0.02 | A0A1D3L3D7 | <i>Methanobacterium congolense</i> | Sodium/pantothenate symporter                                                                                                                                                               |
| 366 | 633 | 0.02 | A0A1D3L4L3 | <i>Methanobacterium congolense</i> | Trk system potassium uptake protein TrkH                                                                                                                                                    |
| 367 | 633 | 0.02 | L0HK93     | <i>Methanoregula formicica</i>     | Major Facilitator Superfamily transporter                                                                                                                                                   |
| 368 | 632 | 0.02 | A7I7K3     | <i>Methanoregula boonei</i>        | CO dehydrogenase/acetyl-CoA synthase complex, beta subunit (EC 2.3.1.169)                                                                                                                   |
| 369 | 631 | 0.02 | A0A1D3L2S6 | <i>Methanobacterium congolense</i> | Putative sensor histidine kinase pdtaS (EC 2.7.13.3)                                                                                                                                        |
| 370 | 631 | 0.02 | A7I7M3     | <i>Methanoregula boonei</i>        | DNA mismatch repair protein MutS                                                                                                                                                            |
| 371 | 631 | 0.02 | L0HDG0     | <i>Methanoregula formicica</i>     | SSS sodium solute transporter                                                                                                                                                               |
| 372 | 630 | 0.02 | A0A1D3L4N6 | <i>Methanobacterium congolense</i> | Inositol-3-phosphate synthase (EC 5.5.1.4)                                                                                                                                                  |
| 373 | 630 | 0.02 | A7I4X0     | <i>Methanoregula boonei</i>        | SufBD protein                                                                                                                                                                               |
| 374 | 629 | 0.02 | A0A1D3L243 | <i>Methanobacterium congolense</i> | CTP synthase (EC 6.3.4.2) (Cytidine 5'-triphosphate synthase) (Cytidine triphosphate synthetase) (CTP synthetase) (CTPS) (UTP--ammonia ligase)                                              |
| 375 | 629 | 0.02 | A7I7L2     | <i>Methanoregula boonei</i>        | Phosphoribosylaminoimidazolecarboxamide formyltransferase/IMP cyclohydrolase (EC 2.1.2.3)                                                                                                   |
| 376 | 627 | 0.02 | A0A1D3L329 | <i>Methanobacterium congolense</i> | Uncharacterized protein                                                                                                                                                                     |
| 377 | 627 | 0.02 | A7I942     | <i>Methanoregula boonei</i>        | Type 2 DNA topoisomerase 6 subunit A (EC 5.99.1.3) (Type II DNA topoisomerase VI subunit A)                                                                                                 |
| 378 | 626 | 0.02 | A7IAJ2     | <i>Methanoregula boonei</i>        | Uncharacterized protein                                                                                                                                                                     |
| 379 | 626 | 0.02 | N8ZVC9     | <i>Acinetobacter gernerii</i>      | Uncharacterized protein                                                                                                                                                                     |
| 380 | 625 | 0.02 | A7I860     | <i>Methanoregula boonei</i>        | Putative phosphoserine phosphatase                                                                                                                                                          |
| 381 | 622 | 0.02 | A0A1D3KZC3 | <i>Methanobacterium congolense</i> | Glutamine synthetase (EC 6.3.1.2)                                                                                                                                                           |
| 382 | 622 | 0.02 | A0A1D3L4K2 | <i>Methanobacterium congolense</i> | Methyl-coenzyme M reductase subunit alpha (EC 2.8.4.1)                                                                                                                                      |



|     |     |      |            |                                    |                                                                                                                    |
|-----|-----|------|------------|------------------------------------|--------------------------------------------------------------------------------------------------------------------|
| 383 | 622 | 0.02 | A7I615     | <i>Methanoregula boonei</i>        | Phenylalanine--tRNA ligase beta subunit (EC 6.1.1.20) (Phenylalanyl-tRNA synthetase beta subunit) (PheRS)          |
| 384 | 621 | 0.02 | A0A1D3L3Q2 | <i>Methanobacterium congolense</i> | Argininosuccinate lyase (ASAL) (EC 4.3.2.1) (Arginosuccinase)                                                      |
| 385 | 621 | 0.02 | A7I8N6     | <i>Methanoregula boonei</i>        | Methyl-accepting chemotaxis sensory transducer                                                                     |
| 386 | 621 | 0.02 | A7I8W3     | <i>Methanoregula boonei</i>        | Uncharacterized protein                                                                                            |
| 387 | 620 | 0.02 | A7I698     | <i>Methanoregula boonei</i>        | Glutamyl-tRNA(Gln) amidotransferase subunit E (Glu-ADT subunit E) (EC 6.3.5.-)                                     |
| 388 | 617 | 0.02 | A7IA28     | <i>Methanoregula boonei</i>        | 3-isopropylmalate dehydratase large subunit (EC 4.2.1.33) (Alpha-IPM isomerase) (IPMI) (Isopropylmalate isomerase) |
| 389 | 617 | 0.02 | Q8VQM8     | <i>Prevotella intermedia</i>       | Mobilization protein                                                                                               |
| 390 | 616 | 0.02 | A0A1D3L0X2 | <i>Methanobacterium congolense</i> | Vitamin B12-dependent ribonucleotide reductase (EC 1.17.4.1)                                                       |
| 391 | 616 | 0.02 | A0A1D3L0Z7 | <i>Methanobacterium congolense</i> | Putative transporter MJ0709                                                                                        |
| 392 | 615 | 0.02 | A7I6G2     | <i>Methanoregula boonei</i>        | Sodium/hydrogen exchanger                                                                                          |
| 393 | 614 | 0.02 | A0A1D3L0C2 | <i>Methanobacterium congolense</i> | Putative lon protease homolog (EC 3.4.21.-)                                                                        |
| 394 | 614 | 0.02 | A7I4T4     | <i>Methanoregula boonei</i>        | Tryptophan synthase beta chain (EC 4.2.1.20)                                                                       |
| 395 | 614 | 0.02 | A7IA56     | <i>Methanoregula boonei</i>        | Small GTP-binding protein                                                                                          |
| 396 | 613 | 0.02 | A7I7Y7     | <i>Methanoregula boonei</i>        | Uncharacterized protein                                                                                            |
| 397 | 613 | 0.02 | A7IAS3     | <i>Methanoregula boonei</i>        | Uncharacterized protein                                                                                            |
| 398 | 612 | 0.02 | A0A1D3L0B1 | <i>Methanobacterium congolense</i> | Probable cobyric acid synthase                                                                                     |
| 399 | 612 | 0.02 | A7I6E9     | <i>Methanoregula boonei</i>        | Uncharacterized protein                                                                                            |
| 400 | 612 | 0.02 | A7I7G0     | <i>Methanoregula boonei</i>        | Beta-lactamase domain protein                                                                                      |
| 401 | 611 | 0.02 | A0A1D3L1P3 | <i>Methanobacterium congolense</i> | Putative MFS-type transporter EfpA                                                                                 |
| 402 | 611 | 0.02 | A0A1D3L472 | <i>Methanobacterium congolense</i> | D-3-phosphoglycerate dehydrogenase (EC 1.1.1.95)                                                                   |
| 403 | 611 | 0.02 | A7I6J3     | <i>Methanoregula boonei</i>        | Argininosuccinate synthase (EC 6.3.4.5) (Citrulline--aspartate ligase)                                             |
| 404 | 610 | 0.02 | A0A1D3L4V5 | <i>Methanobacterium congolense</i> | Putative cation transporter MJ1485                                                                                 |
| 405 | 610 | 0.02 | A7I4A1     | <i>Methanoregula boonei</i>        | Radical SAM domain protein                                                                                         |
| 406 | 609 | 0.02 | A0A1D3L0F1 | <i>Methanobacterium congolense</i> | Uncharacterized protein                                                                                            |
| 407 | 609 | 0.02 | A7IA52     | <i>Methanoregula boonei</i>        | DNA repair and recombination protein RadA                                                                          |
| 408 | 609 | 0.02 | L0HBR8     | <i>Methanoregula formicica</i>     | PAS domain S-box                                                                                                   |
| 409 | 606 | 0.02 | A0A1D3KZ61 | <i>Methanobacterium congolense</i> | 5'-deoxyadenosine deaminase (5'-dA deaminase) (EC 3.5.4.41)                                                        |
| 410 | 605 | 0.02 | A0A1D3L2V0 | <i>Methanobacterium congolense</i> | Pyruvate carboxylase subunit A (EC 6.4.1.1)                                                                        |
| 411 | 605 | 0.02 | A0A1D3L490 | <i>Methanobacterium congolense</i> | Lactaldehyde dehydrogenase (EC 1.2.1.22)                                                                           |
| 412 | 605 | 0.02 | A0A1D3L5F7 | <i>Methanobacterium congolense</i> | Putative transporter YebQ                                                                                          |
| 413 | 605 | 0.02 | A7I5N4     | <i>Methanoregula boonei</i>        | Cell division GTPase-like protein                                                                                  |
| 414 | 605 | 0.02 | A7I9R0     | <i>Methanoregula boonei</i>        | Histone acetyltransferase, ELP3 family                                                                             |
| 415 | 605 | 0.02 | A7IA39     | <i>Methanoregula boonei</i>        | Beta-lactamase domain protein                                                                                      |
| 416 | 604 | 0.02 | A0A1D3L090 | <i>Methanobacterium congolense</i> | Probable phosphoglucosamine mutase (EC 5.4.2.10)                                                                   |

|     |     |      |            |                                               |                                                                                                                                                                                             |
|-----|-----|------|------------|-----------------------------------------------|---------------------------------------------------------------------------------------------------------------------------------------------------------------------------------------------|
| 417 | 604 | 0.02 | A0A1D3L4E2 | <i>Methanobacterium congolense</i>            | RNA-metabolising metallo-beta-lactamase                                                                                                                                                     |
| 418 | 603 | 0.02 | A0A1D3KZ75 | <i>Methanobacterium congolense</i>            | Cobyrinate a,c-diamide synthase (EC 6.3.5.11) (Cobyrinic acid a,c-diamide synthetase)                                                                                                       |
| 419 | 603 | 0.02 | A7I8S2     | <i>Methanoregula boonei</i>                   | Diadenylate cyclase (DAC) (EC 2.7.7.85) (Cyclic-di-AMP synthase) (c-di-AMP synthase)                                                                                                        |
| 420 | 602 | 0.02 | A0A1D3L4B7 | <i>Methanobacterium congolense</i>            | Uncharacterized protein                                                                                                                                                                     |
| 421 | 602 | 0.02 | A0A1D3L554 | <i>Methanobacterium congolense</i>            | Divalent metal cation transporter MntH                                                                                                                                                      |
| 422 | 602 | 0.02 | A7I5S3     | <i>Methanoregula boonei</i>                   | Tetrahydromethanopterin S-methyltransferase, MtrH subunit                                                                                                                                   |
| 423 | 602 | 0.02 | A7I8B3     | <i>Methanoregula boonei</i>                   | Ppx/GppA phosphatase                                                                                                                                                                        |
| 424 | 601 | 0.02 | A0A1D3KZL5 | <i>Methanobacterium congolense</i>            | Uncharacterized protein                                                                                                                                                                     |
| 425 | 600 | 0.02 | A0A1D2WDD6 | <i>Methanobacterium sp.</i>                   | Nitrogenase iron-molybdenum cofactor biosynthesis protein NifN                                                                                                                              |
| 426 | 600 | 0.02 | A7I4I1     | <i>Methanoregula boonei</i>                   | Metal dependent phosphohydrolase                                                                                                                                                            |
| 427 | 599 | 0.02 | A0A1D3L3F6 | <i>Methanobacterium congolense</i>            | Minor teichoic acid biosynthesis protein GgaB                                                                                                                                               |
| 428 | 599 | 0.02 | A7I4L8     | <i>Methanoregula boonei</i>                   | Thiolase                                                                                                                                                                                    |
| 429 | 599 | 0.02 | A7I845     | <i>Methanoregula boonei</i>                   | Asparagine synthase (Glutamine-hydrolyzing) (EC 6.3.5.4)                                                                                                                                    |
| 430 | 598 | 0.02 | A7I5S8     | <i>Methanoregula boonei</i>                   | Tetrahydromethanopterin S-methyltransferase subunit C (EC 2.1.1.86) (N5-methyltetrahydromethanopterin--coenzyme M methyltransferase subunit C)                                              |
| 431 | 598 | 0.02 | A7I763     | <i>Methanoregula boonei</i>                   | Conserved TM helix repeat-containing protein                                                                                                                                                |
| 432 | 598 | 0.02 | A7I8Z4     | <i>Methanoregula boonei</i>                   | Ammonium transporter                                                                                                                                                                        |
| 433 | 598 | 0.02 | A7I9D3     | <i>Methanoregula boonei</i>                   | Phosphoesterase, RecJ domain protein                                                                                                                                                        |
| 434 | 597 | 0.02 | A0A1D3L3J9 | <i>Methanobacterium congolense</i>            | Replication factor C large subunit (RFC large subunit) (Clamp loader large subunit)                                                                                                         |
| 435 | 597 | 0.02 | O27035     | <i>Methanothermobacter thermautotrophicus</i> | V-type ATP synthase beta chain (V-ATPase subunit B)                                                                                                                                         |
| 436 | 596 | 0.02 | A7I865     | <i>Methanoregula boonei</i>                   | LOR/SDH bifunctional enzyme conserved domain protein                                                                                                                                        |
| 437 | 596 | 0.02 | U6EDJ2     | <i>Methanobacterium sp.</i>                   | Uncharacterized protein                                                                                                                                                                     |
| 438 | 595 | 0.02 | A0A1D3KZ06 | <i>Methanobacterium congolense</i>            | Tryptophan synthase beta chain (EC 4.2.1.20)                                                                                                                                                |
| 439 | 595 | 0.02 | A0A1D3KZP4 | <i>Methanobacterium congolense</i>            | Phosphomethylpyrimidine synthase (EC 4.1.99.17) (Hydroxymethylpyrimidine phosphate synthase) (HMP-P synthase) (HMP-phosphate synthase) (HMPP synthase) (Thiamine biosynthesis protein ThiC) |
| 440 | 595 | 0.02 | A0A1D3L131 | <i>Methanobacterium congolense</i>            | 7,8-dihydro-6-hydroxymethylpterin dimethyltransferase (EC 2.1.1.-)                                                                                                                          |
| 441 | 594 | 0.02 | A0A1D3L3K2 | <i>Methanobacterium congolense</i>            | F420-non-reducing hydrogenase vhc subunit A (EC 1.12.99.-)                                                                                                                                  |
| 442 | 594 | 0.02 | A0A1D3L3N9 | <i>Methanobacterium congolense</i>            | Putative methyltransferase PH0819 (EC 2.1.1.-)                                                                                                                                              |
| 443 | 594 | 0.02 | A7I7A0     | <i>Methanoregula boonei</i>                   | UvrABC system protein C (Protein UvrC) (Excinuclease ABC subunit C)                                                                                                                         |
| 444 | 593 | 0.02 | A7I6B2     | <i>Methanoregula boonei</i>                   | Uncharacterized protein                                                                                                                                                                     |
| 445 | 591 | 0.02 | A7I928     | <i>Methanoregula boonei</i>                   | Uncharacterized protein                                                                                                                                                                     |
| 446 | 590 | 0.02 | A0A1D3L252 | <i>Methanobacterium congolense</i>            | Putative ABC transporter ATP-binding protein MJ1662                                                                                                                                         |
| 447 | 590 | 0.02 | A7I800     | <i>Methanoregula boonei</i>                   | Putative flagellar protein FlaH                                                                                                                                                             |
| 448 | 589 | 0.02 | A7I466     | <i>Methanoregula boonei</i>                   | Aminotransferase (EC 2.6.1.-)                                                                                                                                                               |

|     |     |      |            |                                    |                                                                                                                            |
|-----|-----|------|------------|------------------------------------|----------------------------------------------------------------------------------------------------------------------------|
| 449 | 589 | 0.02 | A7I6P1     | <i>Methanoregula boonei</i>        | Carbon monoxide dehydrogenase (EC 1.2.7.4)                                                                                 |
| 450 | 589 | 0.02 | A7IAA8     | <i>Methanoregula boonei</i>        | Uncharacterized protein                                                                                                    |
| 451 | 588 | 0.02 | A0A1D3L3V6 | <i>Methanobacterium congolense</i> | Methanogenesis regulatory histidine kinase Fill (EC 2.7.13.3)                                                              |
| 452 | 588 | 0.02 | A0A1D3L3V8 | <i>Methanobacterium congolense</i> | tRNA-splicing ligase RtcB (EC 6.5.1.-)                                                                                     |
| 453 | 587 | 0.02 | A0A1D3KZV6 | <i>Methanobacterium congolense</i> | Uncharacterized protein                                                                                                    |
| 454 | 586 | 0.02 | A7IAG3     | <i>Methanoregula boonei</i>        | Ribonuclease J (RNase J) (EC 3.1.-.-)                                                                                      |
| 455 | 585 | 0.02 | A0A1D3L5K1 | <i>Methanobacterium congolense</i> | Putative Rieske 2Fe-2S iron-sulfur protein YhfW (EC 1.-.-.-)                                                               |
| 456 | 585 | 0.02 | A7I4W6     | <i>Methanoregula boonei</i>        | Phosphoglucomutase/phosphomannomutase alpha/beta/alpha domain I                                                            |
| 457 | 585 | 0.02 | A7I7F2     | <i>Methanoregula boonei</i>        | Nitrogenase protein alpha chain (EC 1.18.6.1)                                                                              |
| 458 | 585 | 0.02 | A7I9R7     | <i>Methanoregula boonei</i>        | Proline--tRNA ligase (EC 6.1.1.15) (Prolyl-tRNA synthetase) (ProRS)                                                        |
| 459 | 584 | 0.02 | A0A1D3L0W3 | <i>Methanobacterium congolense</i> | AAA ATPase                                                                                                                 |
| 460 | 584 | 0.02 | A7IA30     | <i>Methanoregula boonei</i>        | 3-isopropylmalate dehydrogenase (EC 1.1.1.85)                                                                              |
| 461 | 583 | 0.02 | A0A1D3L581 | <i>Methanobacterium congolense</i> | Coenzyme A biosynthesis bifunctional protein CoaBC (EC 4.1.1.36)                                                           |
| 462 | 582 | 0.02 | A0A1D3L414 | <i>Methanobacterium congolense</i> | Uncharacterized protein                                                                                                    |
| 463 | 582 | 0.02 | A7I4F1     | <i>Methanoregula boonei</i>        | Phosphoribosylformylglycinamide cyclo-ligase (EC 6.3.3.1) (AIR synthase) (AIRS) (Phosphoribosyl-aminoimidazole synthetase) |
| 464 | 581 | 0.02 | A0A1D3KZ63 | <i>Methanobacterium congolense</i> | Bacterial Ig-like domain (Group 3)                                                                                         |
| 465 | 581 | 0.02 | A0A1D3L3A3 | <i>Methanobacterium congolense</i> | ABC-2 type transporter                                                                                                     |
| 466 | 581 | 0.02 | A7I4A7     | <i>Methanoregula boonei</i>        | Thiamine biosynthesis protein ThiC                                                                                         |
| 467 | 581 | 0.02 | A7I606     | <i>Methanoregula boonei</i>        | DEAD/DEAH box helicase domain protein                                                                                      |
| 468 | 581 | 0.02 | A7I899     | <i>Methanoregula boonei</i>        | Putative (R)-citramalate synthase CimA (EC 2.3.1.182)                                                                      |
| 469 | 579 | 0.02 | A7IAM6     | <i>Methanoregula boonei</i>        | Radical SAM domain protein                                                                                                 |
| 470 | 578 | 0.02 | A0A1D3L014 | <i>Methanobacterium congolense</i> | GAF domain protein                                                                                                         |
| 471 | 578 | 0.02 | A0A1D3L364 | <i>Methanobacterium congolense</i> | Enolase (EC 4.2.1.11) (2-phospho-D-glycerate hydro-lyase) (2-phosphoglycerate dehydratase)                                 |
| 472 | 578 | 0.02 | A0A1D3L5L2 | <i>Methanobacterium congolense</i> | Uncharacterized protein                                                                                                    |
| 473 | 578 | 0.02 | A7I5Z9     | <i>Methanoregula boonei</i>        | Uncharacterized protein                                                                                                    |
| 474 | 578 | 0.02 | A7I6B3     | <i>Methanoregula boonei</i>        | ABC transporter related                                                                                                    |
| 475 | 578 | 0.02 | A7IB43     | <i>Methanoregula boonei</i>        | Uncharacterized protein                                                                                                    |
| 476 | 578 | 0.02 | L0HF17     | <i>Methanoregula formicica</i>     | Type I restriction-modification system methyltransferase subunit                                                           |
| 477 | 577 | 0.02 | A0A1D3L3X0 | <i>Methanobacterium congolense</i> | Acetolactate synthase large subunit (EC 2.2.1.6)                                                                           |
| 478 | 577 | 0.02 | A0A1D3L5H4 | <i>Methanobacterium congolense</i> | Uncharacterized protein                                                                                                    |
| 479 | 576 | 0.02 | A0A1D3KZC4 | <i>Methanobacterium congolense</i> | Inner membrane transport permease YbhR                                                                                     |
| 480 | 576 | 0.02 | A0A1D3L5J0 | <i>Methanobacterium congolense</i> | Type A flavoprotein FprA (EC 1.-.-.-)                                                                                      |
| 481 | 576 | 0.02 | A7IA57     | <i>Methanoregula boonei</i>        | Uncharacterized protein                                                                                                    |
| 482 | 575 | 0.02 | A0A1D3L4S7 | <i>Methanobacterium congolense</i> | Glucose-methanol-choline oxidoreductase                                                                                    |
| 483 | 575 | 0.02 |            |                                    |                                                                                                                            |

|     |     |      |            |                                    |                                                                                                                               |
|-----|-----|------|------------|------------------------------------|-------------------------------------------------------------------------------------------------------------------------------|
| 484 | 574 | 0.02 | A7IAQ1     | <i>Methanoregula boonei</i>        | Uncharacterized protein                                                                                                       |
| 485 | 574 | 0.02 | A7I7L0     | <i>Methanoregula boonei</i>        | Dihydroxy-acid dehydratase (DAD) (EC 4.2.1.9)                                                                                 |
| 486 | 574 | 0.02 | A7I771     | <i>Methanoregula boonei</i>        | S-adenosylmethionine synthase (AdoMet synthase) (EC 2.5.1.6) (Methionine adenosyltransferase)                                 |
| 487 | 573 | 0.02 | A0A089ZFB5 | <i>Methanobacterium formicicum</i> | Adhesin-like protein                                                                                                          |
| 488 | 573 | 0.02 | A0A1D3L0L3 | <i>Methanobacterium congolense</i> | Amidophosphoribosyltransferase (ATase) (EC 2.4.2.14) (Glutamine phosphoribosylpyrophosphate amidotransferase) (GPATase)       |
| 489 | 572 | 0.02 | A0A1D3KZ70 | <i>Methanobacterium congolense</i> | Outer membrane protein assembly factor BamB                                                                                   |
| 490 | 572 | 0.02 | A0A1D3L586 | <i>Methanobacterium congolense</i> | S-adenosylmethionine synthase (AdoMet synthase) (EC 2.5.1.6) (Methionine adenosyltransferase)                                 |
| 491 | 572 | 0.02 | A7I4P1     | <i>Methanoregula boonei</i>        | Nucleic acid binding, OB-fold, tRNA/helicase-type                                                                             |
| 492 | 572 | 0.02 | A7I4Q6     | <i>Methanoregula boonei</i>        | tRNA(Ile2) 2-agmatinylcytidine synthetase TiaS (tRNA(Ile2)-agm2C synthetase) (EC 6.3.4.22) (tRNA(Ile2) agmatidine synthetase) |
| 493 | 571 | 0.02 | A0A1D3KZS9 | <i>Methanobacterium congolense</i> | Uncharacterized protein                                                                                                       |
| 494 | 571 | 0.02 | A0A1D3L0S3 | <i>Methanobacterium congolense</i> | Single-stranded-DNA-specific exonuclease RecJ (EC 3.1.-.-)                                                                    |
| 495 | 571 | 0.02 | A7I4L9     | <i>Methanoregula boonei</i>        | UPF0219 protein Mboo_0157                                                                                                     |
| 496 | 571 | 0.02 | A7I7W3     | <i>Methanoregula boonei</i>        | Molybdenum cofactor synthesis domain                                                                                          |
| 497 | 570 | 0.02 | A7I7C4     | <i>Methanoregula boonei</i>        | DEAD_2 domain protein                                                                                                         |
| 498 | 570 | 0.02 | A7I9H9     | <i>Methanoregula boonei</i>        | tRNA pseudouridine synthase Pus10 (EC 5.4.99.25) (tRNA pseudouridine 54/55 synthase) (Psi54/55 synthase)                      |
| 499 | 569 | 0.02 | A0A1D3L3L1 | <i>Methanobacterium congolense</i> | Ammonium transporter                                                                                                          |
| 500 | 569 | 0.02 | A0A1D3L510 | <i>Methanobacterium congolense</i> | Uncharacterized protein                                                                                                       |

**Table S5c.** Functional overview of M2P community (top 500 rank only).

| Rank | Count | Abundance | ID         | Organism                            | Protein Names                         |
|------|-------|-----------|------------|-------------------------------------|---------------------------------------|
| 1    | 3587  | 0.11      | N8ZVC9     | <i>Acinetobacter gernerii</i>       | Uncharacterized protein               |
| 2    | 3329  | 0.10      | Q8VQM8     | <i>Prevotella intermedia</i>        | Mobilization protein                  |
| 3    | 2921  | 0.09      | A0A0A2LWZ9 | <i>Flavobacterium suncheonense</i>  | Transposase                           |
| 4    | 2578  | 0.08      | N8ZNX3     | <i>Acinetobacter gernerii</i>       | Uncharacterized protein               |
| 5    | 2045  | 0.06      | F0FB90     | <i>Prevotella multiformis</i>       | Initiator RepB protein (Fragment)     |
| 6    | 2007  | 0.06      | A0A0R3QEE4 | <i>Brugia timori</i>                | Uncharacterized protein               |
| 7    | 1817  | 0.06      | A0A0U1CQ28 | <i>Chlamydia trachomatis</i>        | Replication protein                   |
| 8    | 1814  | 0.06      | F0FB88     | <i>Prevotella multiformis</i>       | Putative plasmid recombination enzyme |
| 9    | 1491  | 0.05      | A0A0U1CQ01 | <i>Chlamydia trachomatis</i>        | Uncharacterised protein               |
| 10   | 1470  | 0.05      | A0A0Q7S8L4 | <i>Pelomonas sp.</i>                | Transposase                           |
| 11   | 1443  | 0.04      | A0A077XLW5 | <i>Sphinx1.76-related DNA</i>       | Replication protein                   |
| 12   | 1443  | 0.04      |            |                                     |                                       |
| 13   | 1422  | 0.04      | A0A1Q3RZJ5 | <i>Flavobacterium sp.</i>           | Uncharacterized protein               |
| 14   | 1339  | 0.04      | F4GG80     | <i>Alicyclophilus denitrificans</i> | Transposase IS4 family protein        |
| 15   | 1331  | 0.04      | Q8VQM9     | <i>Prevotella intermedia</i>        | Replication protein                   |
| 16   | 1310  | 0.04      | A0A077XNB6 | <i>Sphinx1.76-related DNA</i>       | Replication protein                   |
| 17   | 1240  | 0.04      | A0A1Q3SCF5 | <i>Flavobacterium sp.</i>           | Uncharacterized protein               |
| 18   | 1094  | 0.03      | A0A1E4A455 | <i>Chryseobacterium sp.</i>         | Cell surface protein SprA             |
| 19   | 1076  | 0.03      | A0A1Q3S858 | <i>Flavobacterium sp.</i>           | Uncharacterized protein               |
| 20   | 1070  | 0.03      |            |                                     |                                       |
| 21   | 1055  | 0.03      | A0A1Q3RWC6 | <i>Flavobacterium sp.</i>           | Uncharacterized protein               |
| 22   | 1051  | 0.03      | A0A0E9G9S8 | <i>Chlamydia trachomatis</i>        | Uncharacterised protein               |
| 23   | 957   | 0.03      | A0A1B1ICB8 | <i>Prevotella scopos</i>            | Uncharacterized protein               |
| 24   | 943   | 0.03      | N8YFI4     | <i>Acinetobacter gernerii</i>       | Uncharacterized protein               |
| 25   | 942   | 0.03      | A0A1E3ZQ34 | <i>Chryseobacterium sp.</i>         | Cell envelope biogenesis protein OmpA |
| 26   | 895   | 0.03      | C9MTU8     | <i>Prevotella veroralis</i>         | Initiator RepB protein                |
| 27   | 880   | 0.03      | A0A023UP33 | <i>Magnusiomyces ingens</i>         | Uncharacterized protein (Fragment)    |
| 28   | 848   | 0.03      | A0A0Q8GZB4 | <i>Pelomonas sp.</i>                | UvrABC system protein A               |
| 29   | 833   | 0.03      | A0A1Q3S9F2 | <i>Flavobacterium sp.</i>           | Uncharacterized protein               |
| 30   | 824   | 0.03      | A0A1Q3S0Y5 | <i>Flavobacterium sp.</i>           | Uncharacterized protein               |
| 31   | 803   | 0.02      | G9FB24     | <i>uncultured bacterium</i>         | IS21 family transposition protein     |
| 32   | 765   | 0.02      | A0A0Q7SV37 | <i>Pelomonas sp.</i>                | Glutamate synthase                    |
| 33   | 745   | 0.02      | A0A0Q7S7D9 | <i>Pelomonas sp.</i>                | Uncharacterized protein               |

|    |     |      |            |                                       |                                                                                                                                                                     |
|----|-----|------|------------|---------------------------------------|---------------------------------------------------------------------------------------------------------------------------------------------------------------------|
| 34 | 741 | 0.02 | A0A0Q7RZB1 | <i>Pelomonas sp.</i>                  | Uncharacterized protein                                                                                                                                             |
| 35 | 730 | 0.02 | A0A023UP27 | <i>Magnusiomyces ingens</i>           | Uncharacterized protein                                                                                                                                             |
| 36 | 726 | 0.02 | A0A1Q3M6H6 | <i>Bacteroidales bacterium</i>        | CRISPR-associated endonuclease Cas9 (EC 3.1.-.-)                                                                                                                    |
| 37 | 719 | 0.02 | A0A0Q6WNI0 | <i>Pelomonas sp.</i>                  | DNA-directed RNA polymerase subunit beta' (RNAP subunit beta') (EC 2.7.7.6) (RNA polymerase subunit beta') (Transcriptase subunit beta')                            |
| 38 | 709 | 0.02 | A0A0T5YH86 | <i>Acinetobacter baumannii</i>        | Mobilization protein A                                                                                                                                              |
| 39 | 670 | 0.02 | A0A1K2IH81 | <i>Chryseobacterium limigenitum</i>   | Uncharacterized protein                                                                                                                                             |
| 40 | 661 | 0.02 | A0A0Q7RZF8 | <i>Pelomonas sp.</i>                  | Phosphoribosylformylglycinamide synthase (FGAM synthase) (FGAMS) (EC 6.3.5.3) (Formylglycinamide ribonucleotide amidotransferase) (FGAR amidotransferase) (FGAR-AT) |
| 41 | 655 | 0.02 | E4T3F9     | <i>Paludibacter propionigenes</i>     | Glutamate synthase (NADH) large subunit (EC 1.4.1.14) (EC 1.4.7.1)                                                                                                  |
| 42 | 650 | 0.02 | A0A1Q3S812 | <i>Flavobacterium sp.</i>             | Uncharacterized protein                                                                                                                                             |
| 43 | 647 | 0.02 | A0A0Q7SS31 | <i>Pelomonas sp.</i>                  | Transposase                                                                                                                                                         |
| 44 | 647 | 0.02 | A0A1E4A9F0 | <i>Chryseobacterium sp.</i>           | Uncharacterized protein                                                                                                                                             |
| 45 | 623 | 0.02 | A0A0Q7S6W6 | <i>Pelomonas sp.</i>                  | Indolepyruvate ferredoxin oxidoreductase (EC 1.2.7.8)                                                                                                               |
| 46 | 621 | 0.02 | A0A0M8MCD5 | <i>Flavobacterium akiainvivens</i>    | Integrase                                                                                                                                                           |
| 47 | 611 | 0.02 | A0A0Q6UG42 | <i>Pelomonas sp.</i>                  | Pyruvate ferredoxin oxidoreductase                                                                                                                                  |
| 48 | 610 | 0.02 | A0A1L9GVN0 | <i>Cand. Micrarchaeum acidiphilum</i> | Uncharacterized protein                                                                                                                                             |
| 49 | 608 | 0.02 | A0A0Q7SCT5 | <i>Pelomonas sp.</i>                  | Chromosome partition protein Smc                                                                                                                                    |
| 50 | 597 | 0.02 | A0A0Q7SRI3 | <i>Pelomonas sp.</i>                  | Efflux pump membrane transporter                                                                                                                                    |
| 51 | 596 | 0.02 | A0A0Q6WK82 | <i>Pelomonas sp.</i>                  | RND transporter                                                                                                                                                     |
| 52 | 593 | 0.02 | A0A0D2WNI4 | <i>Capsaspora owczarzaki</i>          | Paramyosin                                                                                                                                                          |
| 53 | 591 | 0.02 | V6RWN6     | <i>Flavobacterium cauense</i>         | Uncharacterized protein                                                                                                                                             |
| 54 | 590 | 0.02 | A0A1J5AN19 | <i>Bacteroidetes bacterium</i>        | IS110 family transposase                                                                                                                                            |
| 55 | 586 | 0.02 | A0A1Q3RUL1 | <i>Flavobacterium sp.</i>             | Uncharacterized protein                                                                                                                                             |
| 56 | 583 | 0.02 | A0A0Q7S7G4 | <i>Pelomonas sp.</i>                  | Efflux pump membrane transporter                                                                                                                                    |
| 57 | 572 | 0.02 | A0A0Q7SMD8 | <i>Pelomonas sp.</i>                  | Acriflavine resistance protein B                                                                                                                                    |
| 58 | 571 | 0.02 | A0A0Q7SKX9 | <i>Pelomonas sp.</i>                  | ATP-dependent helicase                                                                                                                                              |
| 59 | 564 | 0.02 | A0A0R0LGW3 | <i>Ferrovum sp.</i>                   | ATP-dependent RNA helicase RhlE (EC 3.6.4.13)                                                                                                                       |
| 60 | 559 | 0.02 | A0A0Q8GR06 | <i>Pelomonas sp.</i>                  | Alpha-2-macroglobulin                                                                                                                                               |
| 61 | 550 | 0.02 | A0A0Q7SFB9 | <i>Pelomonas sp.</i>                  | Multidrug transporter                                                                                                                                               |
| 62 | 541 | 0.02 | A0A0Q7SBL7 | <i>Pelomonas sp.</i>                  | Efflux pump membrane transporter                                                                                                                                    |
| 63 | 535 | 0.02 | A0A0Q6UIJ2 | <i>Pelomonas sp.</i>                  | Nitrate reductase                                                                                                                                                   |
| 64 | 534 | 0.02 | A0A0D8Y6E2 | <i>Dictyocaulus viviparus</i>         | Uncharacterized protein                                                                                                                                             |
| 65 | 531 | 0.02 | A0A0Q7S584 | <i>Pelomonas sp.</i>                  | DNA-directed DNA polymerase (EC 2.7.7.7)                                                                                                                            |

|    |     |      |            |                                     |                                                                                                                                                                                                                                                                                                                          |
|----|-----|------|------------|-------------------------------------|--------------------------------------------------------------------------------------------------------------------------------------------------------------------------------------------------------------------------------------------------------------------------------------------------------------------------|
| 66 | 525 | 0.02 | A0A0Q7SJP7 | <i>Pelomonas sp.</i>                | Phosphoenolpyruvate carboxylase (PEPC) (PEPCase) (EC 4.1.1.31)                                                                                                                                                                                                                                                           |
| 67 | 524 | 0.02 | A0A1Q3S0Z6 | <i>Flavobacterium sp.</i>           | Uncharacterized protein                                                                                                                                                                                                                                                                                                  |
| 68 | 522 | 0.02 | A0A0Q7RZ30 | <i>Pelomonas sp.</i>                | Acriflavin resistance protein                                                                                                                                                                                                                                                                                            |
| 69 | 521 | 0.02 | A0A0Q7SL82 | <i>Pelomonas sp.</i>                | Multidrug transporter AcrB                                                                                                                                                                                                                                                                                               |
| 70 | 520 | 0.02 | A0A1E3ZXL4 | <i>Chryseobacterium sp.</i>         | Uncharacterized protein                                                                                                                                                                                                                                                                                                  |
| 71 | 512 | 0.02 | A0A1Q3RUG7 | <i>Flavobacterium sp.</i>           | Uncharacterized protein                                                                                                                                                                                                                                                                                                  |
| 72 | 512 | 0.02 | A0A1Q3S3S6 | <i>Flavobacterium sp.</i>           | Uncharacterized protein                                                                                                                                                                                                                                                                                                  |
| 73 | 511 | 0.02 | A0A1Q3S3X4 | <i>Flavobacterium sp.</i>           | Uncharacterized protein                                                                                                                                                                                                                                                                                                  |
| 74 | 509 | 0.02 | E4T8J6     | <i>Paludibacter propionicigenes</i> | Cell surface receptor IPT/TIG domain protein                                                                                                                                                                                                                                                                             |
| 75 | 507 | 0.02 | A0A167ZLW1 | <i>Flavobacterium fryxellicola</i>  | Uncharacterized protein                                                                                                                                                                                                                                                                                                  |
| 76 | 507 | 0.02 | A0A1Q3RUG1 | <i>Flavobacterium sp.</i>           | Uncharacterized protein                                                                                                                                                                                                                                                                                                  |
| 77 | 505 | 0.02 | A0A0Q6U523 | <i>Pelomonas sp.</i>                | Nitric oxide reductase large subunit                                                                                                                                                                                                                                                                                     |
| 78 | 505 | 0.02 | G0IXG6     | <i>Cyclobacterium marinum</i>       | Transposase IS116/IS110/IS902 family protein                                                                                                                                                                                                                                                                             |
| 79 | 504 | 0.02 | A0A1E4ARQ1 | <i>Chryseobacterium sp.</i>         | Uncharacterized protein                                                                                                                                                                                                                                                                                                  |
| 80 | 498 | 0.02 | A0A127MR59 | <i>Pseudomonas citronellolis</i>    | Uncharacterized protein                                                                                                                                                                                                                                                                                                  |
| 81 | 493 | 0.02 | A0A1E4ABZ6 | <i>Chryseobacterium sp.</i>         | Multifunctional fusion protein [Includes: Protein translocase subunit SecD; Protein-export membrane protein SecF]                                                                                                                                                                                                        |
| 82 | 492 | 0.02 | A0A1Q3RVF6 | <i>Flavobacterium sp.</i>           | Multidrug transporter AcrB                                                                                                                                                                                                                                                                                               |
| 83 | 491 | 0.02 | A0A1T5HUH3 | <i>Alkalitalea saponilacus</i>      | Uncharacterized protein                                                                                                                                                                                                                                                                                                  |
| 84 | 490 | 0.02 | A0A0R3R918 | <i>Brugia timori</i>                | Uncharacterized protein                                                                                                                                                                                                                                                                                                  |
| 85 | 487 | 0.02 |            |                                     |                                                                                                                                                                                                                                                                                                                          |
| 86 | 486 | 0.02 | A0A1Q3S042 | <i>Flavobacterium sp.</i>           | Peptidase C25                                                                                                                                                                                                                                                                                                            |
| 87 | 483 | 0.01 | A0A1E4AD77 | <i>Chryseobacterium sp.</i>         | Uncharacterized protein                                                                                                                                                                                                                                                                                                  |
| 88 | 482 | 0.01 | A0A1E4AA02 | <i>Chryseobacterium sp.</i>         | TonB-dependent receptor                                                                                                                                                                                                                                                                                                  |
| 89 | 478 | 0.01 | A0A1Q3S6M2 | <i>Flavobacterium sp.</i>           | Uncharacterized protein                                                                                                                                                                                                                                                                                                  |
| 90 | 477 | 0.01 | A0A0A2M931 | <i>Flavobacterium suncheonense</i>  | Uncharacterized protein (Fragment)                                                                                                                                                                                                                                                                                       |
| 91 | 477 | 0.01 | G9FB23     | <i>uncultured bacterium</i>         | IS21 family transposition protein                                                                                                                                                                                                                                                                                        |
| 92 | 474 | 0.01 | A0A0Q6T5H8 | <i>Pelomonas sp.</i>                | Nodulation protein NolG                                                                                                                                                                                                                                                                                                  |
| 93 | 473 | 0.01 | A0A1E4A330 | <i>Chryseobacterium sp.</i>         | Acriflavin resistance protein                                                                                                                                                                                                                                                                                            |
| 94 | 470 | 0.01 | A0A0Q7T1P6 | <i>Pelomonas sp.</i>                | 3-hydroxyacyl-CoA dehydrogenase                                                                                                                                                                                                                                                                                          |
| 95 | 470 | 0.01 | A0A1E4ADX1 | <i>Chryseobacterium sp.</i>         | Uncharacterized protein                                                                                                                                                                                                                                                                                                  |
| 96 | 469 | 0.01 | A0A0Q7SAQ8 | <i>Pelomonas sp.</i>                | Bifunctional uridylyltransferase/uridylyl-removing enzyme (UTase/UR) (Bifunctional [protein-PII] modification enzyme) (Bifunctional nitrogen sensor protein) [Includes: [Protein-PII]-UMP uridylyl-removing enzyme (UR) (EC 3.1.4.-); [Protein-PII] uridylyltransferase (PII uridylyltransferase) (UTase) (EC 2.7.7.59)] |
| 97 | 469 | 0.01 | A0A0Q7SNJ9 | <i>Pelomonas sp.</i>                | Cyanophycin synthetase                                                                                                                                                                                                                                                                                                   |

|     |     |      |            |                                   |                                                                                                                                                                                                                                                                                                                                                    |
|-----|-----|------|------------|-----------------------------------|----------------------------------------------------------------------------------------------------------------------------------------------------------------------------------------------------------------------------------------------------------------------------------------------------------------------------------------------------|
| 98  | 465 | 0.01 | A0A1E4AFR9 | <i>Chryseobacterium sp.</i>       | Uncharacterized protein                                                                                                                                                                                                                                                                                                                            |
| 99  | 464 | 0.01 | A0A177LQD3 | <i>Chryseobacterium sp.</i>       | Uncharacterized protein                                                                                                                                                                                                                                                                                                                            |
| 100 | 464 | 0.01 | A0A1Q3RVI5 | <i>Flavobacterium sp.</i>         | Uncharacterized protein                                                                                                                                                                                                                                                                                                                            |
| 101 | 463 | 0.01 | A0A0Q7SA64 | <i>Pelomonas sp.</i>              | Transcription-repair-coupling factor (TRCF) (EC 3.6.4.-)                                                                                                                                                                                                                                                                                           |
| 102 | 462 | 0.01 | A0A1Q3S6H8 | <i>Flavobacterium sp.</i>         | Uncharacterized protein                                                                                                                                                                                                                                                                                                                            |
| 103 | 461 | 0.01 | A0A0Q7SE50 | <i>Pelomonas sp.</i>              | Bifunctional glutamine synthetase adenylyltransferase/adenylyl-removing enzyme (ATP:glutamine synthetase adenylyltransferase) (ATase) [Includes: Glutamine synthetase adenylyl-L-tyrosine phosphorylase (EC 2.7.7.89) (Adenylyl removase) (AR) (AT-N); Glutamine synthetase adenylyl transferase (EC 2.7.7.42) (Adenylyl transferase) (AT) (AT-C)] |
| 104 | 460 | 0.01 | A0A023UMT3 | <i>Magnusiomyces ingens</i>       | Uncharacterized protein (Fragment)                                                                                                                                                                                                                                                                                                                 |
| 105 | 459 | 0.01 | A0A023UMS7 | <i>Magnusiomyces ingens</i>       | NADH-ubiquinone oxidoreductase chain 5 (EC 1.6.5.3)                                                                                                                                                                                                                                                                                                |
| 106 | 459 | 0.01 |            |                                   |                                                                                                                                                                                                                                                                                                                                                    |
| 107 | 454 | 0.01 | A0A0Q8H5F4 | <i>Pelomonas sp.</i>              | TonB-dependent receptor                                                                                                                                                                                                                                                                                                                            |
| 108 | 453 | 0.01 | A0A0Q6WN69 | <i>Pelomonas sp.</i>              | Histidine kinase (EC 2.7.13.3)                                                                                                                                                                                                                                                                                                                     |
| 109 | 453 | 0.01 | A0A0Q7SL61 | <i>Pelomonas sp.</i>              | 2-oxoglutarate dehydrogenase subunit E1 (EC 1.2.4.2)                                                                                                                                                                                                                                                                                               |
| 110 | 451 | 0.01 | A0A0Q7S182 | <i>Pelomonas sp.</i>              | Phenylalanine--tRNA ligase beta subunit (EC 6.1.1.20) (Phenylalanyl-tRNA synthetase beta subunit) (PheRS)                                                                                                                                                                                                                                          |
| 111 | 451 | 0.01 | A0A1Q3S3Z3 | <i>Flavobacterium sp.</i>         | DNA methylase                                                                                                                                                                                                                                                                                                                                      |
| 112 | 449 | 0.01 | A0A0Q6T477 | <i>Pelomonas sp.</i>              | Uncharacterized protein                                                                                                                                                                                                                                                                                                                            |
| 113 | 448 | 0.01 | A0A1E4AD73 | <i>Chryseobacterium sp.</i>       | Outer membrane protein assembly factor BamA                                                                                                                                                                                                                                                                                                        |
| 114 | 446 | 0.01 | A0A177LRY5 | <i>Chryseobacterium sp.</i>       | Uncharacterized protein                                                                                                                                                                                                                                                                                                                            |
| 115 | 445 | 0.01 | E4T5D1     | <i>Paludibacter propionigenes</i> | Methionine--tRNA ligase (EC 6.1.1.10) (Methionyl-tRNA synthetase) (MetRS)                                                                                                                                                                                                                                                                          |
| 116 | 443 | 0.01 | A0A0Q7SUY8 | <i>Pelomonas sp.</i>              | Enoyl-CoA hydratase                                                                                                                                                                                                                                                                                                                                |
| 117 | 441 | 0.01 | A0A1E4A2B9 | <i>Chryseobacterium sp.</i>       | Quinol:cytochrome C oxidoreductase                                                                                                                                                                                                                                                                                                                 |
| 118 | 439 | 0.01 | A0A1Q3S2G4 | <i>Flavobacterium sp.</i>         | Protein translocase subunit SecA                                                                                                                                                                                                                                                                                                                   |
| 119 | 438 | 0.01 | A0A0Q7S238 | <i>Pelomonas sp.</i>              | Histidine kinase                                                                                                                                                                                                                                                                                                                                   |
| 120 | 438 | 0.01 | A0A0Q7S7S5 | <i>Pelomonas sp.</i>              | Valine--tRNA ligase (EC 6.1.1.9) (Valyl-tRNA synthetase) (ValRS)                                                                                                                                                                                                                                                                                   |
| 121 | 438 | 0.01 |            |                                   |                                                                                                                                                                                                                                                                                                                                                    |
| 122 | 435 | 0.01 | A0A1E4A8D6 | <i>Chryseobacterium sp.</i>       | Metallophosphoesterase                                                                                                                                                                                                                                                                                                                             |
| 123 | 434 | 0.01 | A0A0Q6TFR1 | <i>Pelomonas sp.</i>              | Uncharacterized protein                                                                                                                                                                                                                                                                                                                            |
| 124 | 434 | 0.01 | A0A0Q7SAX3 | <i>Pelomonas sp.</i>              | Glycine dehydrogenase (decarboxylating) (EC 1.4.4.2) (Glycine cleavage system P-protein) (Glycine decarboxylase) (Glycine dehydrogenase (aminomethyl-transferring))                                                                                                                                                                                |
| 125 | 430 | 0.01 | A0A1Q3RYV8 | <i>Flavobacterium sp.</i>         | 2-oxoglutarate dehydrogenase E1 component                                                                                                                                                                                                                                                                                                          |
| 126 | 429 | 0.01 | A0A0Q7SY69 | <i>Flavobacterium sp.</i>         | DNA helicase (EC 3.6.4.12)                                                                                                                                                                                                                                                                                                                         |
| 127 | 429 | 0.01 | A0A0Q8H242 | <i>Pelomonas sp.</i>              | PAS domain-containing sensor histidine kinase                                                                                                                                                                                                                                                                                                      |
| 128 | 427 | 0.01 | A0A1E4AHR4 | <i>Chryseobacterium sp.</i>       | Uncharacterized protein                                                                                                                                                                                                                                                                                                                            |



|     |     |      |            |                                   |                                                                                                                                      |
|-----|-----|------|------------|-----------------------------------|--------------------------------------------------------------------------------------------------------------------------------------|
| 129 | 427 | 0.01 | A0A1Q3S919 | <i>Flavobacterium sp.</i>         | SusC/RagA family protein                                                                                                             |
| 130 | 426 | 0.01 | A0A0Q7SED5 | <i>Pelomonas sp.</i>              | Alanine--tRNA ligase (EC 6.1.1.7) (Alanyl-tRNA synthetase) (AlaRS)                                                                   |
| 131 | 424 | 0.01 | A0A0Q6TP10 | <i>Pelomonas sp.</i>              | Uncharacterized protein                                                                                                              |
| 132 | 424 | 0.01 | A0A0Q7SEF7 | <i>Pelomonas sp.</i>              | Translation initiation factor IF-2                                                                                                   |
| 133 | 424 | 0.01 | A0A0Q7SN01 | <i>Pelomonas sp.</i>              | ATPase                                                                                                                               |
| 134 | 424 | 0.01 | A0A0Q7SSX8 | <i>Pelomonas sp.</i>              | Fused isobutyryl-CoA mutase [Includes: Isobutyryl-CoA mutase (ICM) (EC 5.4.99.13); P-loop GTPase (EC 3.6.5.-) (G-protein chaperone)] |
| 135 | 423 | 0.01 | A0A0Q7SRF6 | <i>Pelomonas sp.</i>              | DNA topoisomerase III                                                                                                                |
| 136 | 422 | 0.01 | A0A0Q7SL07 | <i>Pelomonas sp.</i>              | DNA polymerase I (EC 2.7.7.7)                                                                                                        |
| 137 | 421 | 0.01 | A0A0Q7SDY4 | <i>Pelomonas sp.</i>              | GCN5 family acetyltransferase                                                                                                        |
| 138 | 421 | 0.01 | A0A1Q3S993 | <i>Flavobacterium sp.</i>         | Uncharacterized protein                                                                                                              |
| 139 | 420 | 0.01 | A0A0Q6W7U3 | <i>Pelomonas sp.</i>              | Uncharacterized protein                                                                                                              |
| 140 | 420 | 0.01 | A0A0Q7SXZ5 | <i>Pelomonas sp.</i>              | Aminopeptidase                                                                                                                       |
| 141 | 419 | 0.01 | A0A1Q3RUH2 | <i>Flavobacterium sp.</i>         | Uncharacterized protein                                                                                                              |
| 142 | 417 | 0.01 | A0A0Q8GKD4 | <i>Pelomonas sp.</i>              | Uncharacterized protein                                                                                                              |
| 143 | 416 | 0.01 | A0A1G4VJQ3 | <i>Flavobacterium saliperosum</i> | Gliding motility-associated C-terminal domain-containing protein                                                                     |
| 144 | 416 | 0.01 | A0A1Q3S8X4 | <i>Flavobacterium sp.</i>         | Cation transporter                                                                                                                   |
| 145 | 416 | 0.01 | A0A1Q3S9A2 | <i>Flavobacterium sp.</i>         | Uncharacterized protein                                                                                                              |
| 146 | 415 | 0.01 | A0A0Q6WDT0 | <i>Pelomonas sp.</i>              | Copper-transporting ATPase                                                                                                           |
| 147 | 415 | 0.01 | A0A0Q7SCD2 | <i>Pelomonas sp.</i>              | Helicase                                                                                                                             |
| 148 | 414 | 0.01 | A0A0Q7S4W2 | <i>Pelomonas sp.</i>              | FAD-linked oxidase                                                                                                                   |
| 149 | 414 | 0.01 | A0A0Q7SD92 | <i>Pelomonas sp.</i>              | Uncharacterized protein                                                                                                              |
| 150 | 414 | 0.01 | A0A0Q7SL81 | <i>Pelomonas sp.</i>              | Uncharacterized protein                                                                                                              |
| 151 | 413 | 0.01 | A0A0Q7S0G4 | <i>Pelomonas sp.</i>              | AAA family ATPase                                                                                                                    |
| 152 | 412 | 0.01 |            |                                   |                                                                                                                                      |
| 153 | 411 | 0.01 | A0A0Q6SZK0 | <i>Pelomonas sp.</i>              | Protein translocase subunit SecA                                                                                                     |
| 154 | 411 | 0.01 | A0A0Q7SJ43 | <i>Pelomonas sp.</i>              | Transposase                                                                                                                          |
| 155 | 410 | 0.01 | A0A1Q3S1D7 | <i>Flavobacterium sp.</i>         | TonB-dependent receptor                                                                                                              |
| 156 | 408 | 0.01 | A0A0Q7SLN7 | <i>Pelomonas sp.</i>              | UvrABC system protein A (UvrA protein) (Excinuclease ABC subunit A)                                                                  |
| 157 | 408 | 0.01 | A0A0Q7T373 | <i>Pelomonas sp.</i>              | Ribonuclease R (RNase R) (EC 3.1.13.1)                                                                                               |
| 158 | 408 | 0.01 | A0A1E4AC15 | <i>Chryseobacterium sp.</i>       | Uncharacterized protein                                                                                                              |
| 159 | 407 | 0.01 | A0A1Q3S5R1 | <i>Flavobacterium sp.</i>         | Uncharacterized protein                                                                                                              |
| 160 | 406 | 0.01 | A0A1Q3SAB4 | <i>Flavobacterium sp.</i>         | TonB-dependent receptor                                                                                                              |
| 161 | 405 | 0.01 | A0A0Q7RYH2 | <i>Pelomonas sp.</i>              | 4-deoxy-4-formamido-L-arabinose-phospho-UDP deformylase                                                                              |
| 162 | 404 | 0.01 | A0A0Q7SEL2 | <i>Pelomonas sp.</i>              | Uncharacterized protein                                                                                                              |
| 163 | 403 | 0.01 | A0A0Q7SCD0 | <i>Pelomonas sp.</i>              | NADPH-dependent 2,4-dienoyl-CoA reductase (EC 1.3.1.34)                                                                              |

|     |     |      |            |                                |                                                                          |
|-----|-----|------|------------|--------------------------------|--------------------------------------------------------------------------|
| 164 | 403 | 0.01 | A0A1Q3S7F1 | <i>Flavobacterium sp.</i>      | Beta-N-acetylglucosaminidase                                             |
| 165 | 402 | 0.01 | A0A0Q8GQS0 | <i>Pelomonas sp.</i>           | DNA mismatch repair protein MutS                                         |
| 166 | 400 | 0.01 | A0A0Q7S059 | <i>Pelomonas sp.</i>           | DNA topoisomerase 4 subunit A (EC 5.99.1.3) (Topoisomerase IV subunit A) |
| 167 | 399 | 0.01 | A0A1Q3RXA0 | <i>Flavobacterium sp.</i>      | Uncharacterized protein                                                  |
| 168 | 399 | 0.01 | A0A1Q3RYP3 | <i>Flavobacterium sp.</i>      | DNA-directed DNA polymerase (EC 2.7.7.7)                                 |
| 169 | 398 | 0.01 | A0A0Q6U1A9 | <i>Pelomonas sp.</i>           | Uncharacterized protein                                                  |
| 170 | 398 | 0.01 | A0A0Q6WQC8 | <i>Pelomonas sp.</i>           | Uncharacterized protein                                                  |
| 171 | 398 | 0.01 | A0A0Q7T172 | <i>Pelomonas sp.</i>           | Ribonucleoside-diphosphate reductase (EC 1.17.4.1)                       |
| 172 | 397 | 0.01 | A0A0Q7SLM8 | <i>Pelomonas sp.</i>           | Tat pathway signal sequence domain protein                               |
| 173 | 397 | 0.01 | A0A0Q7SNK2 | <i>Pelomonas sp.</i>           | Short-chain dehydrogenase                                                |
| 174 | 397 | 0.01 | A0A0Q8GMD4 | <i>Pelomonas sp.</i>           | Uncharacterized protein                                                  |
| 175 | 396 | 0.01 | A0A060RAF8 | <i>Mucinivorans hirudinis</i>  | Mobile element protein                                                   |
| 176 | 396 | 0.01 | A0A0Q7SDQ5 | <i>Pelomonas sp.</i>           | Efflux pump membrane transporter                                         |
| 177 | 396 | 0.01 | A0A1E4A6N2 | <i>Chryseobacterium sp.</i>    | Alkaline phosphatase                                                     |
| 178 | 395 | 0.01 | A0A1Q3S7G4 | <i>Flavobacterium sp.</i>      | Acriflavin resistance protein                                            |
| 179 | 394 | 0.01 | A0A1E4A9M1 | <i>Chryseobacterium sp.</i>    | Cation transporter                                                       |
| 180 | 393 | 0.01 | A0A1E4AHQ8 | <i>Chryseobacterium sp.</i>    | TonB-dependent receptor                                                  |
| 181 | 391 | 0.01 | A0A0Q6U3Y0 | <i>Pelomonas sp.</i>           | Uncharacterized protein                                                  |
| 182 | 390 | 0.01 | A0A0Q7SDJ3 | <i>Pelomonas sp.</i>           | Iron permease                                                            |
| 183 | 390 | 0.01 | A0A0Q7SRK7 | <i>Pelomonas sp.</i>           | Leucine--tRNA ligase (EC 6.1.1.4) (Leucyl-tRNA synthetase) (LeuRS)       |
| 184 | 390 | 0.01 |            |                                |                                                                          |
| 185 | 389 | 0.01 | A0A1Q3M3N2 | <i>Bacteroidales bacterium</i> | Uncharacterized protein (Fragment)                                       |
| 186 | 389 | 0.01 | A0A1Q3SAM2 | <i>Flavobacterium sp.</i>      | Uncharacterized protein                                                  |
| 187 | 388 | 0.01 | A0A1E4AAS0 | <i>Chryseobacterium sp.</i>    | Uncharacterized protein                                                  |
| 188 | 387 | 0.01 | A0A0Q7ST55 | <i>Pelomonas sp.</i>           | Guanosine-3',5'-bis(Diphosphate) 3'-pyrophosphohydrolase                 |
| 189 | 387 | 0.01 | A0A1Q3RXG1 | <i>Flavobacterium sp.</i>      | Uncharacterized protein                                                  |
| 190 | 386 | 0.01 | A0A0Q7SWA7 | <i>Pelomonas sp.</i>           | Aldehyde oxidase                                                         |
| 191 | 386 | 0.01 | A0A0Q8H4A2 | <i>Pelomonas sp.</i>           | Uncharacterized protein                                                  |
| 192 | 386 | 0.01 | A0A1M3DNL6 | <i>Bacteroidales bacterium</i> | IS4 family transposase                                                   |
| 193 | 384 | 0.01 | A0A0Q7T0L4 | <i>Pelomonas sp.</i>           | Primosomal protein N' (EC 3.6.4.-) (ATP-dependent helicase PriA)         |
| 194 | 378 | 0.01 | F3ZQL8     | <i>Bacteroides coprosuis</i>   | Transposase IS4 family protein                                           |
| 195 | 378 | 0.01 |            |                                |                                                                          |
| 196 | 377 | 0.01 | A0A0Q6UGX4 | <i>Pelomonas sp.</i>           | Nitrate reductase                                                        |
| 197 | 377 | 0.01 | A0A1E4AFY9 | <i>Chryseobacterium sp.</i>    | Uncharacterized protein                                                  |
| 198 | 376 | 0.01 | A0A0Q6WDL9 | <i>Pelomonas sp.</i>           | Serine/threonine protein kinase                                          |
| 199 | 375 | 0.01 | A0A1B2YV26 | <i>uncultured bacterium</i>    | Conserved repeat domain-containing protein                               |

|     |     |      |            |                               |                                                                                                           |
|-----|-----|------|------------|-------------------------------|-----------------------------------------------------------------------------------------------------------|
| 200 | 374 | 0.01 | A0A0Q6X783 | <i>Pelomonas sp.</i>          | Peptidase M13                                                                                             |
| 201 | 374 | 0.01 | A0A0Q7SH01 | <i>Pelomonas sp.</i>          | Lysine decarboxylase                                                                                      |
| 202 | 374 | 0.01 | A0A1Q3S3T4 | <i>Flavobacterium sp.</i>     | TonB-dependent receptor                                                                                   |
| 203 | 372 | 0.01 | A0A077XLZ7 | <i>Sphinx1.76-related DNA</i> | Replication protein                                                                                       |
| 204 | 372 | 0.01 | A0A0Q7S0S4 | <i>Pelomonas sp.</i>          | GTP pyrophosphokinase                                                                                     |
| 205 | 372 | 0.01 | A0A0Q8H074 | <i>Pelomonas sp.</i>          | Uncharacterized protein                                                                                   |
| 206 | 369 | 0.01 | A0A1Q3RWE1 | <i>Flavobacterium sp.</i>     | Penicillin-binding protein                                                                                |
| 207 | 368 | 0.01 | A0A1Q3S2W6 | <i>Flavobacterium sp.</i>     | Cytochrome C biogenesis protein                                                                           |
| 208 | 368 | 0.01 |            |                               |                                                                                                           |
| 209 | 367 | 0.01 | A0A0Q7T112 | <i>Pelomonas sp.</i>          | ATP-dependent DNA helicase Rep (EC 3.6.4.12)                                                              |
| 210 | 367 | 0.01 | A0A1E3ZYA8 | <i>Chryseobacterium sp.</i>   | Uncharacterized protein                                                                                   |
| 211 | 367 | 0.01 | A0A1E4A2A9 | <i>Chryseobacterium sp.</i>   | Organic solvent tolerance protein OstA                                                                    |
| 212 | 367 | 0.01 | A0A1E4A7M8 | <i>Chryseobacterium sp.</i>   | Uncharacterized protein                                                                                   |
| 213 | 366 | 0.01 | A0A0Q6TOC3 | <i>Pelomonas sp.</i>          | DNA repair protein RecN (Recombination protein N)                                                         |
| 214 | 365 | 0.01 | A0A016UCK1 | <i>Ancylostoma ceylanicum</i> | Uncharacterized protein                                                                                   |
| 215 | 365 | 0.01 | A0A0Q6UIQ9 | <i>Pelomonas sp.</i>          | Histidine kinase (EC 2.7.13.3)                                                                            |
| 216 | 365 | 0.01 | A0A0Q7S7L6 | <i>Pelomonas sp.</i>          | Protease/lipase ABC transporter permease/ATP-binding protein                                              |
| 217 | 365 | 0.01 | A0A1Q3RXE2 | <i>Flavobacterium sp.</i>     | Uncharacterized protein                                                                                   |
| 218 | 363 | 0.01 |            |                               |                                                                                                           |
| 219 | 363 | 0.01 |            |                               |                                                                                                           |
| 220 | 362 | 0.01 | A0A0Q7SKP8 | <i>Pelomonas sp.</i>          | Outer membrane protein assembly factor BamA                                                               |
| 221 | 362 | 0.01 | A0A0Q7SQT9 | <i>Pelomonas sp.</i>          | Chemotaxis protein                                                                                        |
| 222 | 362 | 0.01 |            |                               |                                                                                                           |
| 223 | 361 | 0.01 | A0A0Q7SW91 | <i>Pelomonas sp.</i>          | Helicase                                                                                                  |
| 224 | 361 | 0.01 | A0A0Q7TOC2 | <i>Pelomonas sp.</i>          | Cell division protein                                                                                     |
| 225 | 361 | 0.01 | A0A177LPI8 | <i>Chryseobacterium sp.</i>   | Uncharacterized protein                                                                                   |
| 226 | 361 | 0.01 | A0A1Q3S2Z4 | <i>Flavobacterium sp.</i>     | Aminopeptidase                                                                                            |
| 227 | 361 | 0.01 |            |                               |                                                                                                           |
| 228 | 359 | 0.01 | A0A0Q7SYC6 | <i>Pelomonas sp.</i>          | Chaperone protein ClpB                                                                                    |
| 229 | 358 | 0.01 | A0A0Q7S820 | <i>Pelomonas sp.</i>          | Asparagine synthase                                                                                       |
| 230 | 356 | 0.01 | A0A1Q3S9B3 | <i>Flavobacterium sp.</i>     | Uncharacterized protein                                                                                   |
| 231 | 355 | 0.01 | A0A0Q6THH1 | <i>Pelomonas sp.</i>          | Uncharacterized protein                                                                                   |
| 232 | 355 | 0.01 | A0A0Q7S1U2 | <i>Pelomonas sp.</i>          | Potassium transporter                                                                                     |
| 233 | 355 | 0.01 | A0A1Q3S511 | <i>Flavobacterium sp.</i>     | Heat-shock protein Hsp70                                                                                  |
| 234 | 354 | 0.01 | A0A1Q3S549 | <i>Flavobacterium sp.</i>     | Phenylalanine--tRNA ligase beta subunit (EC 6.1.1.20) (Phenylalanyl-tRNA synthetase beta subunit) (PheRS) |

|     |     |      |            |                                      |                                                                                                                                                                                          |
|-----|-----|------|------------|--------------------------------------|------------------------------------------------------------------------------------------------------------------------------------------------------------------------------------------|
| 235 | 354 | 0.01 |            |                                      |                                                                                                                                                                                          |
| 236 | 353 | 0.01 | A0A127MVT9 | <i>Pseudomonas citronellolis</i>     | Uncharacterized protein                                                                                                                                                                  |
| 237 | 353 | 0.01 | A0A1Q3S8S4 | <i>Flavobacterium sp.</i>            | Sodium:proline symporter                                                                                                                                                                 |
| 238 | 352 | 0.01 | A0A0Q7S4H3 | <i>Pelomonas sp.</i>                 | Carbon starvation protein A                                                                                                                                                              |
| 239 | 352 | 0.01 | A0A0Q8GZT2 | <i>Pelomonas sp.</i>                 | Penicillin-binding protein                                                                                                                                                               |
| 240 | 352 | 0.01 | A0A1E3ZRN6 | <i>Chryseobacterium sp.</i>          | Uncharacterized protein                                                                                                                                                                  |
| 241 | 352 | 0.01 | A0A1Q3S9F5 | <i>Flavobacterium sp.</i>            | DNA mismatch repair protein MutS                                                                                                                                                         |
| 242 | 351 | 0.01 | A0A1E3ZQQ1 | <i>Chryseobacterium sp.</i>          | Uncharacterized protein                                                                                                                                                                  |
| 243 | 351 | 0.01 | N8YF58     | <i>Acinetobacter gernerii</i>        | Uncharacterized protein                                                                                                                                                                  |
| 244 | 350 | 0.01 | A0A0Q7SU04 | <i>Pelomonas sp.</i>                 | K(+)-insensitive pyrophosphate-energized proton pump (EC 3.6.1.1) (Membrane-bound proton-translocating pyrophosphatase) (Pyrophosphate-energized inorganic pyrophosphatase) (H(+)-PPase) |
| 245 | 349 | 0.01 | A0A0Q6WQM3 | <i>Pelomonas sp.</i>                 | Carbon monoxide dehydrogenase                                                                                                                                                            |
| 246 | 349 | 0.01 | A0A0Q7T0F9 | <i>Pelomonas sp.</i>                 | Lon protease (EC 3.4.21.53) (ATP-dependent protease La)                                                                                                                                  |
| 247 | 349 | 0.01 | A0A0R0LL75 | <i>Ferroplasma sp.</i>               | N-6 DNA methylase                                                                                                                                                                        |
| 248 | 348 | 0.01 | A0A0Q7T6T8 | <i>Pelomonas sp.</i>                 | Histidine kinase                                                                                                                                                                         |
| 249 | 347 | 0.01 | A0A1E3ZTP9 | <i>Chryseobacterium sp.</i>          | Hybrid sensor histidine kinase/response regulator                                                                                                                                        |
| 250 | 345 | 0.01 | A0A1E4ACQ6 | <i>Chryseobacterium sp.</i>          | LmbE family protein                                                                                                                                                                      |
| 251 | 345 | 0.01 | A0A1J5HM76 | <i>Porphyromonadaceae bacterium</i>  | Multidrug transporter AcrB                                                                                                                                                               |
| 252 | 344 | 0.01 | A0A0K0WVI4 | <i>Litodititis aff. marina PmIII</i> | NADH dehydrogenase subunit 5                                                                                                                                                             |
| 253 | 344 | 0.01 | A0A0Q7S0Z7 | <i>Pelomonas sp.</i>                 | RNA-binding transcriptional accessory protein                                                                                                                                            |
| 254 | 344 | 0.01 | A0A0Q7SHH7 | <i>Pelomonas sp.</i>                 | Aldehyde dehydrogenase                                                                                                                                                                   |
| 255 | 342 | 0.01 | A0A0Q7S5A2 | <i>Pelomonas sp.</i>                 | Glutamate-1-semialdehyde 2,1-aminomutase                                                                                                                                                 |
| 256 | 342 | 0.01 | A0A0Q7T2M8 | <i>Pelomonas sp.</i>                 | Uncharacterized protein                                                                                                                                                                  |
| 257 | 342 | 0.01 | A0A1E3ZPZ7 | <i>Chryseobacterium sp.</i>          | Peptidase S46                                                                                                                                                                            |
| 258 | 341 | 0.01 | A0A0Q6UF08 | <i>Pelomonas sp.</i>                 | NnrS family protein                                                                                                                                                                      |
| 259 | 340 | 0.01 | A0A0Q6WL84 | <i>Pelomonas sp.</i>                 | Uncharacterized protein                                                                                                                                                                  |
| 260 | 340 | 0.01 | A0A0Q6X5F3 | <i>Pelomonas sp.</i>                 | Alpha-2-macroglobulin                                                                                                                                                                    |
| 261 | 340 | 0.01 | A0A0Q7RYJ8 | <i>Pelomonas sp.</i>                 | 5-methyltetrahydropteroyltriglutamate--homocysteine methyltransferase (EC 2.1.1.14) (Cobalamin-independent methionine synthase) (Methionine synthase, vitamin-B12 independent isozyme)   |
| 262 | 340 | 0.01 | A0A0Q7SFG6 | <i>Pelomonas sp.</i>                 | Chaperone protein HtpG (Heat shock protein HtpG) (High temperature protein G)                                                                                                            |
| 263 | 340 | 0.01 | A0A0Q7SP22 | <i>Pelomonas sp.</i>                 | UPF0313 protein ASD35_21020                                                                                                                                                              |
| 264 | 339 | 0.01 | A0A1E4AD61 | <i>Chryseobacterium sp.</i>          | Uncharacterized protein                                                                                                                                                                  |
| 265 | 339 | 0.01 | A0A1Q3S9B2 | <i>Flavobacterium sp.</i>            | Uncharacterized protein                                                                                                                                                                  |

|     |     |      |            |                                    |                                                                                                                                                                     |
|-----|-----|------|------------|------------------------------------|---------------------------------------------------------------------------------------------------------------------------------------------------------------------|
| 266 | 339 | 0.01 |            |                                    |                                                                                                                                                                     |
| 267 | 336 | 0.01 | A0A0Q7SSA6 | <i>Pelomonas sp.</i>               | CbbBc protein                                                                                                                                                       |
| 268 | 335 | 0.01 | S2WV93     | <i>Delftia acidovorans</i>         | Uncharacterized protein                                                                                                                                             |
| 269 | 334 | 0.01 | A0A0Q6T720 | <i>Pelomonas sp.</i>               | DNA gyrase subunit A (EC 5.99.1.3)                                                                                                                                  |
| 270 | 334 | 0.01 | A0A0Q6TI43 | <i>Pelomonas sp.</i>               | Elongation factor G                                                                                                                                                 |
| 271 | 334 | 0.01 | A0A0Q8H948 | <i>Pelomonas sp.</i>               | Tat pathway signal sequence domain protein                                                                                                                          |
| 272 | 334 | 0.01 | A0A1Q3S143 | <i>Flavobacterium sp.</i>          | Glycine dehydrogenase (decarboxylating) (EC 1.4.4.2) (Glycine cleavage system P-protein) (Glycine decarboxylase) (Glycine dehydrogenase (aminomethyl-transferring)) |
| 273 | 333 | 0.01 | A0A0Q7S3D7 | <i>Pelomonas sp.</i>               | ABC transporter                                                                                                                                                     |
| 274 | 333 | 0.01 | A0A0Q7SBS2 | <i>Pelomonas sp.</i>               | Uncharacterized protein                                                                                                                                             |
| 275 | 333 | 0.01 | A0A0Q7SGC9 | <i>Pelomonas sp.</i>               | 3-hydroxyacyl-CoA dehydrogenase                                                                                                                                     |
| 276 | 333 | 0.01 | A0A0Q8GG85 | <i>Pelomonas sp.</i>               | Amidohydrolase                                                                                                                                                      |
| 277 | 332 | 0.01 | A0A0M9VJW9 | <i>Flavobacterium akiainvivens</i> | Transposase                                                                                                                                                         |
| 278 | 332 | 0.01 | A0A0Q6U057 | <i>Pelomonas sp.</i>               | Multidrug transporter AcrB                                                                                                                                          |
| 279 | 332 | 0.01 | A0A0Q8H0M9 | <i>Pelomonas sp.</i>               | Uncharacterized protein                                                                                                                                             |
| 280 | 332 | 0.01 | A0A180EWA0 | <i>Bacteroidales bacterium</i>     | Replication protein                                                                                                                                                 |
| 281 | 331 | 0.01 | A0A1E4AAQ4 | <i>Chryseobacterium sp.</i>        | Copper oxidase                                                                                                                                                      |
| 282 | 330 | 0.01 | A0A0Q6WEF8 | <i>Pelomonas sp.</i>               | Uncharacterized protein                                                                                                                                             |
| 283 | 329 | 0.01 | A0A0Q8GWX9 | <i>Pelomonas sp.</i>               | TonB-dependent receptor                                                                                                                                             |
| 284 | 329 | 0.01 | A0A174XH04 | <i>Bacteroides caccae</i>          | Addiction module toxin, Txe/YoeB family                                                                                                                             |
| 285 | 329 | 0.01 | A0A1E4ADZ5 | <i>Chryseobacterium sp.</i>        | ABC transporter substrate-binding protein                                                                                                                           |
| 286 | 329 | 0.01 | E4T5D5     | <i>Paludibacter propionigenes</i>  | DNA-directed DNA polymerase (EC 2.7.7.7)                                                                                                                            |
| 287 | 328 | 0.01 | A0A0Q6T9Y1 | <i>Pelomonas sp.</i>               | Uncharacterized protein                                                                                                                                             |
| 288 | 328 | 0.01 | A0A0Q7SNN2 | <i>Pelomonas sp.</i>               | Chemotaxis protein                                                                                                                                                  |
| 289 | 328 | 0.01 | A0A0Q8GYI4 | <i>Pelomonas sp.</i>               | Uncharacterized protein                                                                                                                                             |
| 290 | 328 | 0.01 | A0A1Q3RVH4 | <i>Flavobacterium sp.</i>          | Metallophosphoesterase                                                                                                                                              |
| 291 | 328 | 0.01 | A0A1Q3S878 | <i>Flavobacterium sp.</i>          | Patatin                                                                                                                                                             |
| 292 | 327 | 0.01 | A1W6Q0     | <i>Acidovorax sp.</i>              | Integrase, catalytic region                                                                                                                                         |
| 293 | 326 | 0.01 | A0A0Q6TWC3 | <i>Pelomonas sp.</i>               | Uncharacterized protein                                                                                                                                             |
| 294 | 325 | 0.01 | A0A0Q6TCI2 | <i>Pelomonas sp.</i>               | Uncharacterized protein                                                                                                                                             |
| 295 | 324 | 0.01 | A0A0Q7SCB4 | <i>Pelomonas sp.</i>               | tRNA uridine 5-carboxymethylaminomethyl modification enzyme MnmG (Glucose-inhibited division protein A)                                                             |
| 296 | 324 | 0.01 | A0A0Q7SF49 | <i>Pelomonas sp.</i>               | Phosphogluconate dehydratase                                                                                                                                        |
| 297 | 324 | 0.01 | A0A0Q7SQV3 | <i>Pelomonas sp.</i>               | Radical SAM protein                                                                                                                                                 |
| 298 | 324 | 0.01 | A0A0Q7SWN5 | <i>Pelomonas sp.</i>               | Dihydrolipoyl dehydrogenase (EC 1.8.1.4)                                                                                                                            |
| 299 | 323 | 0.01 | A0A0Q6WW26 | <i>Pelomonas sp.</i>               | Uncharacterized protein                                                                                                                                             |

|     |     |      |            |                                     |                                                                                                                                                                                                                                                                |
|-----|-----|------|------------|-------------------------------------|----------------------------------------------------------------------------------------------------------------------------------------------------------------------------------------------------------------------------------------------------------------|
| 300 | 322 | 0.01 | A0A0Q6UDH8 | <i>Pelomonas sp.</i>                | Tricorn protease homolog (EC 3.4.21.-)                                                                                                                                                                                                                         |
| 301 | 322 | 0.01 | A0A1E3ZY95 | <i>Chryseobacterium sp.</i>         | Uncharacterized protein                                                                                                                                                                                                                                        |
| 302 | 322 | 0.01 | A0A1Q3S7K6 | <i>Flavobacterium sp.</i>           | Uncharacterized protein                                                                                                                                                                                                                                        |
| 303 | 321 | 0.01 | A0A0Q7SBP1 | <i>Pelomonas sp.</i>                | Histidine kinase                                                                                                                                                                                                                                               |
| 304 | 320 | 0.01 | A0A0Q7SSL2 | <i>Pelomonas sp.</i>                | Glycerol acyltransferase                                                                                                                                                                                                                                       |
| 305 | 320 | 0.01 | A0A0Q7T1G9 | <i>Pelomonas sp.</i>                | Transketolase (EC 2.2.1.1)                                                                                                                                                                                                                                     |
| 306 | 320 | 0.01 | A0A1E3ZX97 | <i>Chryseobacterium sp.</i>         | Gliding motility protein                                                                                                                                                                                                                                       |
| 307 | 320 | 0.01 | A0A1Q3S6Q0 | <i>Flavobacterium sp.</i>           | DNA polymerase I (EC 2.7.7.7)                                                                                                                                                                                                                                  |
| 308 | 319 | 0.01 | A0A0Q6W9P5 | <i>Pelomonas sp.</i>                | Uncharacterized protein                                                                                                                                                                                                                                        |
| 309 | 318 | 0.01 | A0A0Q6TGJ4 | <i>Pelomonas sp.</i>                | LPS-assembly protein LptD                                                                                                                                                                                                                                      |
| 310 | 318 | 0.01 | A0A1T5GFF7 | <i>Sphingobacterium nematocida</i>  | Gliding motility-associated C-terminal domain-containing protein                                                                                                                                                                                               |
| 311 | 317 | 0.01 | A0A0Q6U1R3 | <i>Pelomonas sp.</i>                | Alkaline phosphatase                                                                                                                                                                                                                                           |
| 312 | 317 | 0.01 | A0A0Q7SCU6 | <i>Pelomonas sp.</i>                | ATP-dependent DNA helicase RecG (EC 3.6.4.12)                                                                                                                                                                                                                  |
| 313 | 317 | 0.01 | A0A0Q7SDP1 | <i>Pelomonas sp.</i>                | Cyanophycin synthetase                                                                                                                                                                                                                                         |
| 314 | 317 | 0.01 | A0A1Q3RWQ7 | <i>Flavobacterium sp.</i>           | Cation/H(+) antiporter                                                                                                                                                                                                                                         |
| 315 | 316 | 0.01 | A0A0Q7SDI5 | <i>Pelomonas sp.</i>                | Malic enzyme (EC 1.1.1.40)                                                                                                                                                                                                                                     |
| 316 | 316 | 0.01 | A0A0Q7SFN6 | <i>Pelomonas sp.</i>                | Type II secretion system protein E                                                                                                                                                                                                                             |
| 317 | 316 | 0.01 | A0A1Q3RZB2 | <i>Flavobacterium sp.</i>           | Uncharacterized protein                                                                                                                                                                                                                                        |
| 318 | 315 | 0.01 | A0A0Q7S434 | <i>Pelomonas sp.</i>                | Multifunctional fusion protein [Includes: 3-phosphoshikimate 1-carboxyvinyltransferase (EC 2.5.1.19) (5-enolpyruvylshikimate-3-phosphate synthase) (EPSP synthase) (EPSPS); Cytidylate kinase (CK) (EC 2.7.4.25) (Cytidine monophosphate kinase) (CMP kinase)] |
| 319 | 315 | 0.01 | A0A1E3ZRQ0 | <i>Chryseobacterium sp.</i>         | Uncharacterized protein                                                                                                                                                                                                                                        |
| 320 | 314 | 0.01 | A0A0Q7SKK0 | <i>Pelomonas sp.</i>                | Uncharacterized protein                                                                                                                                                                                                                                        |
| 321 | 314 | 0.01 | A0A0Q7SKQ6 | <i>Pelomonas sp.</i>                | ATP-dependent DNA helicase RecQ                                                                                                                                                                                                                                |
| 322 | 314 | 0.01 | A0A1E4A395 | <i>Chryseobacterium sp.</i>         | Peptidase S46                                                                                                                                                                                                                                                  |
| 323 | 313 | 0.01 | A0A1Q3RZD7 | <i>Flavobacterium sp.</i>           | ATP-dependent helicase                                                                                                                                                                                                                                         |
| 324 | 313 | 0.01 | A6GYU0     | <i>Flavobacterium psychrophilum</i> | DNA-directed RNA polymerase subunit beta (RNAP subunit beta) (EC 2.7.7.6) (RNA polymerase subunit beta) (Transcriptase subunit beta)                                                                                                                           |
| 325 | 313 | 0.01 |            |                                     |                                                                                                                                                                                                                                                                |
| 326 | 312 | 0.01 | K9L3G6     | <i>Magnusiomyces magnusii</i>       | Cytochrome b                                                                                                                                                                                                                                                   |
| 327 | 311 | 0.01 | A0A0Q7TOV8 | <i>Pelomonas sp.</i>                | Sodium:solute symporter                                                                                                                                                                                                                                        |
| 328 | 311 | 0.01 | A0A0Q7T1K0 | <i>Pelomonas sp.</i>                | Carboxypeptidase                                                                                                                                                                                                                                               |
| 329 | 311 | 0.01 | A0A1E4ABE8 | <i>Chryseobacterium sp.</i>         | Methionine synthase                                                                                                                                                                                                                                            |
| 330 | 311 | 0.01 | A0A1Q3S6W5 | <i>Flavobacterium sp.</i>           | Peptidase M16                                                                                                                                                                                                                                                  |
| 331 | 310 | 0.01 | A0A0L8VCE1 | <i>Sunxiuqinia dokdonensis</i>      | Multidrug transporter AcrB                                                                                                                                                                                                                                     |

|     |     |      |            |                                     |                                                                                                                   |
|-----|-----|------|------------|-------------------------------------|-------------------------------------------------------------------------------------------------------------------|
| 332 | 310 | 0.01 | A0A0P6IS02 | <i>Daphnia magna</i>                | Uncharacterized protein                                                                                           |
| 333 | 310 | 0.01 | A0A1E4ABW2 | <i>Chryseobacterium sp.</i>         | Peptidase M1                                                                                                      |
| 334 | 309 | 0.01 | A0A0Q6TH52 | <i>Pelomonas sp.</i>                | Uncharacterized protein                                                                                           |
| 335 | 309 | 0.01 | A0A0Q6U105 | <i>Pelomonas sp.</i>                | Uncharacterized protein                                                                                           |
| 336 | 309 | 0.01 | A0A0Q7SYJ9 | <i>Pelomonas sp.</i>                | Dihydroxy-acid dehydratase (EC 4.2.1.9)                                                                           |
| 337 | 309 | 0.01 | A0A0Q7T6K8 | <i>Pelomonas sp.</i>                | ABC transporter ATP-binding protein                                                                               |
| 338 | 309 | 0.01 | A0A0Q8GEG5 | <i>Pelomonas sp.</i>                | Uncharacterized protein                                                                                           |
| 339 | 308 | 0.01 | A0A1Q3RT16 | <i>Flavobacterium sp.</i>           | S9 family peptidase                                                                                               |
| 340 | 308 | 0.01 | E4T072     | <i>Paludibacter propionicigenes</i> | Pyruvate, phosphate dikinase (EC 2.7.9.1)                                                                         |
| 341 | 307 | 0.01 | A0A0Q7SMZ0 | <i>Pelomonas sp.</i>                | TonB-dependent receptor                                                                                           |
| 342 | 307 | 0.01 | A0A0Q7ST48 | <i>Pelomonas sp.</i>                | ABC transporter                                                                                                   |
| 343 | 307 | 0.01 | A0A0Q7T1B8 | <i>Pelomonas sp.</i>                | Glucose-6-phosphate isomerase (GPI) (EC 5.3.1.9) (Phosphoglucose isomerase) (PGI) (Phosphohexose isomerase) (PHI) |
| 344 | 307 | 0.01 | A0A1E4AC98 | <i>Chryseobacterium sp.</i>         | Probable potassium transport system protein kup                                                                   |
| 345 | 306 | 0.01 | A0A0Q7RWI0 | <i>Pelomonas sp.</i>                | Glucokinase (EC 2.7.1.2) (Glucose kinase)                                                                         |
| 346 | 306 | 0.01 | A0A0Q7SCJ9 | <i>Pelomonas sp.</i>                | Heme ABC transporter ATP-binding protein                                                                          |
| 347 | 306 | 0.01 | A0A1E4A600 | <i>Chryseobacterium sp.</i>         | Recombinase                                                                                                       |
| 348 | 306 | 0.01 | A0A1Q3LCT2 | <i>Bacteroidales bacterium</i>      | Cell filamentation protein Fic                                                                                    |
| 349 | 306 | 0.01 | A0A1Q3SAJ2 | <i>Flavobacterium sp.</i>           | Tail-specific protease                                                                                            |
| 350 | 305 | 0.01 | A0A0Q8GEL5 | <i>Pelomonas sp.</i>                | Uncharacterized protein                                                                                           |
| 351 | 305 | 0.01 | A0A1Q3S7E9 | <i>Flavobacterium sp.</i>           | Formate acetyltransferase                                                                                         |
| 352 | 304 | 0.01 | A0A0Q7RZY0 | <i>Pelomonas sp.</i>                | DNA topoisomerase 4 subunit B (EC 5.99.1.3) (Topoisomerase IV subunit B)                                          |
| 353 | 304 | 0.01 | A0A1Q3S1W4 | <i>Flavobacterium sp.</i>           | Sulfatase                                                                                                         |
| 354 | 303 | 0.01 | A0A0Q7SB38 | <i>Pelomonas sp.</i>                | NADH-quinone oxidoreductase (EC 1.6.5.11)                                                                         |
| 355 | 303 | 0.01 | A0A0Q7SBQ3 | <i>Pelomonas sp.</i>                | Anthranilate synthase component 1 (EC 4.1.3.27)                                                                   |
| 356 | 303 | 0.01 | A0A0Q7SJM3 | <i>Pelomonas sp.</i>                | tRNA modification GTPase MnmE (EC 3.6.-.-)                                                                        |
| 357 | 303 | 0.01 | A0A1E4AD98 | <i>Chryseobacterium sp.</i>         | Ribonuclease R (RNase R) (EC 3.1.13.1)                                                                            |
| 358 | 302 | 0.01 | H8KUZ8     | <i>Solitalea canadensis</i>         | Uncharacterized protein                                                                                           |
| 359 | 301 | 0.01 | A0A0Q7S7F4 | <i>Pelomonas sp.</i>                | Phosphoenolpyruvate-protein phosphotransferase (EC 2.7.3.9) (Phosphotransferase system, enzyme I)                 |
| 360 | 301 | 0.01 | D8L7S1     | <i>Paramecium caudatum</i>          | NADH-ubiquinone oxidoreductase chain 5 (EC 1.6.5.3)                                                               |
| 361 | 300 | 0.01 | A0A0Q7S0T9 | <i>Pelomonas sp.</i>                | MFS transporter                                                                                                   |
| 362 | 300 | 0.01 | A0A0Q7S6Y8 | <i>Pelomonas sp.</i>                | Uncharacterized protein                                                                                           |
| 363 | 300 | 0.01 | A0A1Q3SAW0 | <i>Flavobacterium sp.</i>           | Sugar hydrolase                                                                                                   |
| 364 | 300 | 0.01 | I9R3U4     | <i>Bacteroides cellulosilyticus</i> | Uncharacterized protein                                                                                           |
| 365 | 300 | 0.01 |            |                                     |                                                                                                                   |

|     |     |      |            |                                |                                                                                                                                                                     |
|-----|-----|------|------------|--------------------------------|---------------------------------------------------------------------------------------------------------------------------------------------------------------------|
| 366 | 299 | 0.01 | A0A023UM92 | <i>Magnusiomyces ingens</i>    | Uncharacterized protein                                                                                                                                             |
| 367 | 299 | 0.01 | A0A0Q7SKQ9 | <i>Pelomonas sp.</i>           | L-aspartate oxidase (EC 1.4.3.16)                                                                                                                                   |
| 368 | 299 | 0.01 | A0A1Q3SAL9 | <i>Flavobacterium sp.</i>      | Peptidase M3                                                                                                                                                        |
| 369 | 299 | 0.01 |            |                                |                                                                                                                                                                     |
| 370 | 298 | 0.01 | A0A0D6TL26 | <i>Flavobacterium sp.</i>      | Metalloprotease                                                                                                                                                     |
| 371 | 298 | 0.01 | A0A0Q7SZN7 | <i>Pelomonas sp.</i>           | Urease subunit alpha (EC 3.5.1.5) (Urea amidohydrolase subunit alpha)                                                                                               |
| 372 | 298 | 0.01 | A0A0Q8G4H5 | <i>Pelomonas sp.</i>           | Elongation factor Tu (EF-Tu)                                                                                                                                        |
| 373 | 298 | 0.01 |            |                                |                                                                                                                                                                     |
| 374 | 297 | 0.01 | A0A0Q7SKW7 | <i>Pelomonas sp.</i>           | Long-chain fatty acid--CoA ligase                                                                                                                                   |
| 375 | 297 | 0.01 | A0A1E4A183 | <i>Chryseobacterium sp.</i>    | Tyrosine protein kinase                                                                                                                                             |
| 376 | 297 | 0.01 | A0A1E4ACZ5 | <i>Chryseobacterium sp.</i>    | TonB-dependent receptor                                                                                                                                             |
| 377 | 296 | 0.01 | A0A0Q6THL3 | <i>Pelomonas sp.</i>           | Uncharacterized protein                                                                                                                                             |
| 378 | 296 | 0.01 | A0A0Q6TIL7 | <i>Pelomonas sp.</i>           | Uncharacterized protein                                                                                                                                             |
| 379 | 296 | 0.01 | A0A0Q6UFQ4 | <i>Pelomonas sp.</i>           | Dihydroxy-acid dehydratase (EC 4.2.1.9)                                                                                                                             |
| 380 | 296 | 0.01 | A0A0Q7RWA8 | <i>Pelomonas sp.</i>           | DNA mismatch repair protein MutL                                                                                                                                    |
| 381 | 296 | 0.01 | A0A0Q7S6B9 | <i>Pelomonas sp.</i>           | Uncharacterized protein                                                                                                                                             |
| 382 | 296 | 0.01 | A0A0Q7SVE2 | <i>Pelomonas sp.</i>           | Metal ABC transporter permease                                                                                                                                      |
| 383 | 296 | 0.01 | A0A0Q8GMN6 | <i>Pelomonas sp.</i>           | Uncharacterized protein                                                                                                                                             |
| 384 | 295 | 0.01 | A0A0Q6U486 | <i>Pelomonas sp.</i>           | Glucose-methanol-choline oxidoreductase                                                                                                                             |
| 385 | 295 | 0.01 | A0A1Q3S1U2 | <i>Flavobacterium sp.</i>      | Phosphoribosylformylglycinamide synthase (FGAM synthase) (FGAMS) (EC 6.3.5.3) (Formylglycinamide ribonucleotide amidotransferase) (FGAR amidotransferase) (FGAR-AT) |
| 386 | 294 | 0.01 | A0A0Q6SWR0 | <i>Pelomonas sp.</i>           | Uncharacterized protein                                                                                                                                             |
| 387 | 294 | 0.01 | A0A0Q6TDG6 | <i>Pelomonas sp.</i>           | Uncharacterized protein                                                                                                                                             |
| 388 | 294 | 0.01 | A0A0Q7SWY9 | <i>Pelomonas sp.</i>           | Uncharacterized protein                                                                                                                                             |
| 389 | 294 | 0.01 | A0A0Q7SXS7 | <i>Pelomonas sp.</i>           | Uncharacterized protein                                                                                                                                             |
| 390 | 294 | 0.01 | A0A0Q7SZT2 | <i>Pelomonas sp.</i>           | Type IV-A pilus assembly ATPase PilB                                                                                                                                |
| 391 | 294 | 0.01 | A0A1Q3M3K5 | <i>Bacteroidales bacterium</i> | Alpha-mannosidase                                                                                                                                                   |
| 392 | 294 | 0.01 | A0A1Q3S478 | <i>Flavobacterium sp.</i>      | Conjugal transfer protein TraG                                                                                                                                      |
| 393 | 293 | 0.01 | A0A0Q6T928 | <i>Pelomonas sp.</i>           | Beta-galactosidase                                                                                                                                                  |
| 394 | 293 | 0.01 | A0A0Q7S098 | <i>Pelomonas sp.</i>           | Transcription termination factor Rho (EC 3.6.4.-) (ATP-dependent helicase Rho)                                                                                      |
| 395 | 293 | 0.01 | A0A0Q7SF85 | <i>Pelomonas sp.</i>           | Aldehyde dehydrogenase                                                                                                                                              |
| 396 | 293 | 0.01 | A0A0Q7SL43 | <i>Pelomonas sp.</i>           | Polyphosphate kinase (EC 2.7.4.1) (ATP-polyphosphate phosphotransferase) (Polyphosphoric acid kinase)                                                               |
| 397 | 292 | 0.01 | A0A023UPJ4 | <i>Magnusiomyces ingens</i>    | Uncharacterized protein (Fragment)                                                                                                                                  |
| 398 | 292 | 0.01 | A0A0Q6TH04 | <i>Pelomonas sp.</i>           | Uncharacterized protein                                                                                                                                             |
| 399 | 292 | 0.01 | A0A0Q7SJQ2 | <i>Pelomonas sp.</i>           | Dihydroxy-acid dehydratase (EC 4.2.1.9)                                                                                                                             |



|     |     |      |            |                                     |                                                                                                                                                                                                                               |
|-----|-----|------|------------|-------------------------------------|-------------------------------------------------------------------------------------------------------------------------------------------------------------------------------------------------------------------------------|
| 400 | 292 | 0.01 | A0A0Q8G5N2 | <i>Pelomonas sp.</i>                | Uncharacterized protein                                                                                                                                                                                                       |
| 401 | 292 | 0.01 | A0A1M3DC14 | <i>Bacteroidales bacterium</i>      | Formate C-acetyltransferase                                                                                                                                                                                                   |
| 402 | 292 | 0.01 | A0A1Q3RWZ9 | <i>Flavobacterium sp.</i>           | Uncharacterized protein                                                                                                                                                                                                       |
| 403 | 292 | 0.01 | A0A1Q3SB52 | <i>Flavobacterium sp.</i>           | Acriflavin resistance protein                                                                                                                                                                                                 |
| 404 | 291 | 0.01 | A0A0Q6UA04 | <i>Pelomonas sp.</i>                | Uncharacterized protein                                                                                                                                                                                                       |
| 405 | 291 | 0.01 | A0A0Q6XBI6 | <i>Pelomonas sp.</i>                | Penicillin-binding protein 1C                                                                                                                                                                                                 |
| 406 | 291 | 0.01 |            |                                     |                                                                                                                                                                                                                               |
| 407 | 291 | 0.01 |            |                                     |                                                                                                                                                                                                                               |
| 408 | 290 | 0.01 | A0A0Q6TBZ3 | <i>Pelomonas sp.</i>                | Multidrug transporter                                                                                                                                                                                                         |
| 409 | 290 | 0.01 | A0A1M3MBI7 | <i>Paludibacter sp.</i>             | Cell surface protein SprA                                                                                                                                                                                                     |
| 410 | 290 | 0.01 |            |                                     |                                                                                                                                                                                                                               |
| 411 | 289 | 0.01 | A0A0P0UB73 | <i>Flavobacterium psychrophilum</i> | Multidrug transporter AcrB                                                                                                                                                                                                    |
| 412 | 289 | 0.01 | A0A0Q6TGN2 | <i>Pelomonas sp.</i>                | DNA helicase (EC 3.6.4.12)                                                                                                                                                                                                    |
| 413 | 289 | 0.01 | A0A1E4AGS9 | <i>Chryseobacterium sp.</i>         | TonB-dependent receptor                                                                                                                                                                                                       |
| 414 | 288 | 0.01 | A0A0Q7SWP5 | <i>Pelomonas sp.</i>                | Xylulose kinase                                                                                                                                                                                                               |
| 415 | 288 | 0.01 | A0A1Q3S4I8 | <i>Flavobacterium sp.</i>           | Uncharacterized protein                                                                                                                                                                                                       |
| 416 | 287 | 0.01 | A0A023UP41 | <i>Magnusiomyces ingens</i>         | Cytochrome c oxidase subunit 1 (EC 1.9.3.1)                                                                                                                                                                                   |
| 417 | 287 | 0.01 | A0A0Q7SUD0 | <i>Pelomonas sp.</i>                | AMP-binding protein                                                                                                                                                                                                           |
| 418 | 287 | 0.01 | A0A1E4A8B6 | <i>Chryseobacterium sp.</i>         | Type II and III secretion system protein                                                                                                                                                                                      |
| 419 | 287 | 0.01 | A0A1E4ACD4 | <i>Chryseobacterium sp.</i>         | Gliding motility lipoprotein GldJ                                                                                                                                                                                             |
| 420 | 287 | 0.01 | A0A1Q3S8N5 | <i>Flavobacterium sp.</i>           | Uncharacterized protein                                                                                                                                                                                                       |
| 421 | 287 | 0.01 | A0A1Q3S9I3 | <i>Flavobacterium sp.</i>           | Type IV secretion protein Rhs                                                                                                                                                                                                 |
| 422 | 286 | 0.01 | A0A0Q6T4E7 | <i>Pelomonas sp.</i>                | TonB-dependent receptor                                                                                                                                                                                                       |
| 423 | 286 | 0.01 | A0A0Q7SDP6 | <i>Pelomonas sp.</i>                | Uncharacterized protein                                                                                                                                                                                                       |
| 424 | 286 | 0.01 | A0A0Q7SFQ5 | <i>Pelomonas sp.</i>                | Uncharacterized protein                                                                                                                                                                                                       |
| 425 | 286 | 0.01 | A0A0Q7SN74 | <i>Pelomonas sp.</i>                | Bifunctional purine biosynthesis protein PurH [Includes: IMP cyclohydrolase (EC 3.5.4.10) (IMP synthase) (Inosinicase) (ATIC); Phosphoribosylaminoimidazolecarboxamide formyltransferase (EC 2.1.2.3) (AICAR transformylase)] |
| 426 | 286 | 0.01 | A0A0Q7SZX8 | <i>Pelomonas sp.</i>                | Malate dehydrogenase                                                                                                                                                                                                          |
| 427 | 286 | 0.01 | A0A0Q8GY27 | <i>Pelomonas sp.</i>                | Uncharacterized protein                                                                                                                                                                                                       |
| 428 | 286 | 0.01 | A0A1Q3S8C6 | <i>Flavobacterium sp.</i>           | Uncharacterized protein                                                                                                                                                                                                       |
| 429 | 286 | 0.01 | H8MU17     | <i>Corallococcus coralloides</i>    | Long-chain-fatty-acid--CoA ligase                                                                                                                                                                                             |
| 430 | 285 | 0.01 | A0A0Q7SGQ0 | <i>Pelomonas sp.</i>                | ATP-dependent RNA helicase                                                                                                                                                                                                    |
| 431 | 285 | 0.01 | A0A0Q7T3S1 | <i>Pelomonas sp.</i>                | Radical SAM protein                                                                                                                                                                                                           |
| 432 | 285 | 0.01 | A0A1Q3S0W7 | <i>Flavobacterium sp.</i>           | Uncharacterized protein                                                                                                                                                                                                       |

|     |     |      |            |                               |                                                                                                       |
|-----|-----|------|------------|-------------------------------|-------------------------------------------------------------------------------------------------------|
| 433 | 284 | 0.01 | A0A0Q6UEX1 | <i>Pelomonas sp.</i>          | Glutamine--tRNA ligase (EC 6.1.1.18) (Glutamyl-tRNA synthetase) (GlnRS)                               |
| 434 | 284 | 0.01 | A0A0Q7SMM0 | <i>Pelomonas sp.</i>          | Aldehyde dehydrogenase                                                                                |
| 435 | 283 | 0.01 | A0A0Q6U912 | <i>Pelomonas sp.</i>          | Uncharacterized protein                                                                               |
| 436 | 283 | 0.01 | A0A1E4A7R6 | <i>Chryseobacterium sp.</i>   | Uncharacterized protein                                                                               |
| 437 | 283 | 0.01 | A0A1Q3RW11 | <i>Flavobacterium sp.</i>     | Magnesium-translocating P-type ATPase                                                                 |
| 438 | 283 | 0.01 | A0A1Q3S955 | <i>Flavobacterium sp.</i>     | Polyphosphate kinase (EC 2.7.4.1) (ATP-polyphosphate phosphotransferase) (Polyphosphoric acid kinase) |
| 439 | 282 | 0.01 | A0A023UM78 | <i>Magnusiomyces ingens</i>   | NADH dehydrogenase subunit 2 (EC 1.6.5.3)                                                             |
| 440 | 282 | 0.01 | A0A0Q6TEV6 | <i>Pelomonas sp.</i>          | Multidrug transporter                                                                                 |
| 441 | 282 | 0.01 | A0A0Q8GXY5 | <i>Pelomonas sp.</i>          | Uncharacterized protein                                                                               |
| 442 | 280 | 0.01 | A0A0Q7SF22 | <i>Pelomonas sp.</i>          | Amidotransferase                                                                                      |
| 443 | 280 | 0.01 | A0A0Q8GHK7 | <i>Pelomonas sp.</i>          | Uncharacterized protein                                                                               |
| 444 | 280 | 0.01 | A0A0Q8GZU0 | <i>Pelomonas sp.</i>          | Uncharacterized protein                                                                               |
| 445 | 279 | 0.01 | A0A0Q6TJ53 | <i>Pelomonas sp.</i>          | Uncharacterized protein                                                                               |
| 446 | 279 | 0.01 | A0A0Q6U119 | <i>Pelomonas sp.</i>          | Histidine kinase (EC 2.7.13.3)                                                                        |
| 447 | 279 | 0.01 | A0A0Q7SSI3 | <i>Pelomonas sp.</i>          | Methylmalonate-semialdehyde dehydrogenase                                                             |
| 448 | 279 | 0.01 | A0A0Q7T0Q3 | <i>Pelomonas sp.</i>          | Alkyl hydroperoxide reductase subunit F                                                               |
| 449 | 279 | 0.01 | A0A1Q3S8T7 | <i>Flavobacterium sp.</i>     | Nucleotidyltransferase                                                                                |
| 450 | 278 | 0.01 | A0A0Q7SFI7 | <i>Pelomonas sp.</i>          | Multidrug transporter                                                                                 |
| 451 | 278 | 0.01 | A0A1Q3RX80 | <i>Flavobacterium sp.</i>     | Uncharacterized protein                                                                               |
| 452 | 277 | 0.01 | A0A0Q7S282 | <i>Pelomonas sp.</i>          | UvrABC system protein B (Protein UvrB) (Excinuclease ABC subunit B)                                   |
| 453 | 277 | 0.01 | A0A1E3ZYM1 | <i>Chryseobacterium sp.</i>   | Peptidylprolyl isomerase (EC 5.2.1.8)                                                                 |
| 454 | 277 | 0.01 | A0A1Q3RY34 | <i>Flavobacterium sp.</i>     | TonB-dependent receptor                                                                               |
| 455 | 277 | 0.01 | A1W5C2     | <i>Acidovorax sp.</i>         | IstB domain protein ATP-binding protein                                                               |
| 456 | 276 | 0.01 | A0A0Q7SGT2 | <i>Pelomonas sp.</i>          | Gamma-glutamyltransferase                                                                             |
| 457 | 275 | 0.01 | A0A0Q7SLU5 | <i>Pelomonas sp.</i>          | Glutamate synthase (EC 1.4.1.13)                                                                      |
| 458 | 275 | 0.01 | A0A140JXE2 | <i>Escherichia coli</i>       | Uncharacterized protein                                                                               |
| 459 | 275 | 0.01 | A0A1E4AEN9 | <i>Chryseobacterium sp.</i>   | Peptidase S9                                                                                          |
| 460 | 274 | 0.01 | A0A0Q6TC22 | <i>Pelomonas sp.</i>          | Uncharacterized protein                                                                               |
| 461 | 274 | 0.01 | A0A0Q7S1G7 | <i>Pelomonas sp.</i>          | Thiamine pyrophosphate-binding protein                                                                |
| 462 | 274 | 0.01 | A0A1Q3S421 | <i>Flavobacterium sp.</i>     | Uncharacterized protein (Fragment)                                                                    |
| 463 | 273 | 0.01 | A0A077XLZ0 | <i>Sphinx1.76-related DNA</i> | Replication protein                                                                                   |
| 464 | 273 | 0.01 | A0A0Q7RU29 | <i>Pelomonas sp.</i>          | Isoleucine--tRNA ligase (EC 6.1.1.5) (Isoleucyl-tRNA synthetase) (IleRS)                              |
| 465 | 273 | 0.01 | A0A0Q7SDH4 | <i>Pelomonas sp.</i>          | Long-chain fatty acid--CoA ligase                                                                     |
| 466 | 273 | 0.01 | A0A0Q7SQJ3 | <i>Pelomonas sp.</i>          | Molybdopterin oxidoreductase                                                                          |
| 467 | 272 | 0.01 | A0A0Q6THN9 | <i>Pelomonas sp.</i>          | Uncharacterized protein                                                                               |

|     |     |      |            |                                     |                                                                                                                    |
|-----|-----|------|------------|-------------------------------------|--------------------------------------------------------------------------------------------------------------------|
| 468 | 272 | 0.01 | A0A0Q7S074 | <i>Pelomonas sp.</i>                | Thymidine phosphorylase (EC 2.4.2.4) (TdRPase)                                                                     |
| 469 | 272 | 0.01 | A0A0Q7SPJ8 | <i>Pelomonas sp.</i>                | ABC transporter permease                                                                                           |
| 470 | 272 | 0.01 | A0A0Q7ST88 | <i>Pelomonas sp.</i>                | Peptidase                                                                                                          |
| 471 | 272 | 0.01 | A0A1E4A2H0 | <i>Chryseobacterium sp.</i>         | Peptidylprolyl isomerase                                                                                           |
| 472 | 272 | 0.01 | A0A1E4A473 | <i>Chryseobacterium sp.</i>         | Penicillin-binding protein 2                                                                                       |
| 473 | 272 | 0.01 | A0A1Q3S481 | <i>Flavobacterium sp.</i>           | Uncharacterized protein                                                                                            |
| 474 | 272 | 0.01 |            |                                     |                                                                                                                    |
| 475 | 271 | 0.01 | A0A0Q7S368 | <i>Pelomonas sp.</i>                | MSHA biogenesis protein MshE                                                                                       |
| 476 | 271 | 0.01 | A0A0Q7SZ55 | <i>Pelomonas sp.</i>                | 1-deoxy-D-xylulose-5-phosphate synthase (EC 2.2.1.7) (1-deoxyxylulose-5-phosphate synthase) (DXP synthase) (DXPS)  |
| 477 | 271 | 0.01 | A0A1Q3RZ46 | <i>Flavobacterium sp.</i>           | Uncharacterized protein                                                                                            |
| 478 | 271 | 0.01 | A0A1Q3SA66 | <i>Flavobacterium sp.</i>           | Polyribonucleotide nucleotidyltransferase (EC 2.7.7.8) (Polynucleotide phosphorylase) (PNPase)                     |
| 479 | 271 | 0.01 | E4T2R0     | <i>Paludibacter propionicigenes</i> | ATPase AAA-2 domain protein                                                                                        |
| 480 | 270 | 0.01 | A0A0Q6TNS7 | <i>Pelomonas sp.</i>                | Fis family transcriptional regulator                                                                               |
| 481 | 270 | 0.01 | A0A0Q6WLQ9 | <i>Pelomonas sp.</i>                | Cell division protein FtsZ                                                                                         |
| 482 | 270 | 0.01 | A0A0Q7S5E8 | <i>Pelomonas sp.</i>                | Cysteine desulfurase                                                                                               |
| 483 | 270 | 0.01 | A0A0Q7SSA4 | <i>Pelomonas sp.</i>                | PAS domain-containing sensor histidine kinase                                                                      |
| 484 | 270 | 0.01 | A0A1Q3M5E8 | <i>Bacteroidales bacterium</i>      | Uncharacterized protein (Fragment)                                                                                 |
| 485 | 270 | 0.01 | A0A1Q3M633 | <i>Bacteroidales bacterium</i>      | ATP-dependent helicase                                                                                             |
| 486 | 270 | 0.01 | A0A1Q3RY20 | <i>Flavobacterium sp.</i>           | Collagen-binding protein                                                                                           |
| 487 | 270 | 0.01 | A0A1Q3S3S5 | <i>Flavobacterium sp.</i>           | Uncharacterized protein                                                                                            |
| 488 | 269 | 0.01 | A0A0Q7S8W9 | <i>Pelomonas sp.</i>                | Peptidase M3                                                                                                       |
| 489 | 269 | 0.01 | A0A0Q7SK57 | <i>Pelomonas sp.</i>                | 2-hydroxy-acid oxidase                                                                                             |
| 490 | 269 | 0.01 | A0A0Q7SQY5 | <i>Pelomonas sp.</i>                | Uncharacterized protein                                                                                            |
| 491 | 269 | 0.01 | A0A0Q7SV39 | <i>Pelomonas sp.</i>                | Acyl-CoA dehydrogenase                                                                                             |
| 492 | 269 | 0.01 | A0A0Q8H4B7 | <i>Pelomonas sp.</i>                | Phenylacetic acid degradation protein                                                                              |
| 493 | 268 | 0.01 | A0A0Q6T2K7 | <i>Pelomonas sp.</i>                | 3-isopropylmalate dehydratase large subunit (EC 4.2.1.33) (Alpha-IPM isomerase) (IPMI) (Isopropylmalate isomerase) |
| 494 | 268 | 0.01 | A0A0Q7S8B3 | <i>Pelomonas sp.</i>                | 23S rRNA (uracil(1939)-C(5))-methyltransferase RImD (EC 2.1.1.190) (23S rRNA(m5U1939)-methyltransferase)           |
| 495 | 268 | 0.01 | A0A0Q7SQ46 | <i>Pelomonas sp.</i>                | Ferredoxin oxidoreductase                                                                                          |
| 496 | 268 | 0.01 | A0A0Q7SWZ8 | <i>Pelomonas sp.</i>                | Ribonucleoside-diphosphate reductase (EC 1.17.4.1)                                                                 |
| 497 | 268 | 0.01 | A0A1E4A3S3 | <i>Chryseobacterium sp.</i>         | Glycosyl transferase                                                                                               |
| 498 | 268 | 0.01 | A0A1E4A9N2 | <i>Chryseobacterium sp.</i>         | Uncharacterized protein                                                                                            |
| 499 | 268 | 0.01 | A0A1E4AGS6 | <i>Chryseobacterium sp.</i>         | ATPase                                                                                                             |
| 500 | 268 | 0.01 | A0A1I1TKT3 | <i>Pseudomonas citronellolis</i>    | Uncharacterized protein                                                                                            |



**Table S6a.** Functional overview of M4A community (top 500 rank only).

| Rank | Count | Abundance | ID         | Organism                            | Protein Names                                                                                                                            |
|------|-------|-----------|------------|-------------------------------------|------------------------------------------------------------------------------------------------------------------------------------------|
| 1    | 5032  | 0.17      | AOA0D5N8Q4 | <i>Geobacter sulfurreducens</i>     | Transposase                                                                                                                              |
| 2    | 3549  | 0.12      | Q749Z8     | <i>Geobacter sulfurreducens</i>     | Transposase of ISGsu6, IS21 family                                                                                                       |
| 3    | 2853  | 0.10      |            |                                     |                                                                                                                                          |
| 4    | 2145  | 0.07      | A0A1F9PUL2 | <i>Desulfuromonadales bacterium</i> | Restriction endonuclease                                                                                                                 |
| 5    | 2112  | 0.07      | Q749Z7     | <i>Geobacter sulfurreducens</i>     | ATP/GTP-binding transposition helper of ISGsu6, IS21 family                                                                              |
| 6    | 1828  | 0.06      | Q39Y12     | <i>Geobacter metallireducens</i>    | DNA-directed RNA polymerase subunit beta' (RNAP subunit beta') (EC 2.7.7.6) (RNA polymerase subunit beta') (Transcriptase subunit beta') |
| 7    | 1611  | 0.06      | Q748Y6     | <i>Geobacter sulfurreducens</i>     | DNA-directed RNA polymerase subunit beta (RNAP subunit beta) (EC 2.7.7.6) (RNA polymerase subunit beta) (Transcriptase subunit beta)     |
| 8    | 1485  | 0.05      | A0A0D5N7W1 | <i>Geobacter sulfurreducens</i>     | ATPase                                                                                                                                   |
| 9    | 1402  | 0.05      | E8WQ80     | <i>Geobacter sp.</i>                | Integrase catalytic region                                                                                                               |
| 10   | 1390  | 0.05      | Q748X8     | <i>Geobacter sulfurreducens</i>     | Elongation factor Tu (EF-Tu)                                                                                                             |
| 11   | 1364  | 0.05      | J7LWF3     | <i>Geobacter metallireducens</i>    | Transposase, IS256 family                                                                                                                |
| 12   | 1289  | 0.04      | Q74AK2     | <i>Geobacter sulfurreducens</i>     | Sodium/solute symporter family protein                                                                                                   |
| 13   | 1266  | 0.04      | A0A0A8WNU3 | <i>Geobacter sp.</i>                | Protein TraC                                                                                                                             |
| 14   | 1245  | 0.04      | Q39Q43     | <i>Geobacter metallireducens</i>    | Pyruvate-flavodoxin oxidoreductase (EC 1.2.7.-)                                                                                          |
| 15   | 1182  | 0.04      | N8ZVC9     | <i>Acinetobacter gernerii</i>       | Uncharacterized protein                                                                                                                  |
| 16   | 1180  | 0.04      | A0A0D5N8M0 | <i>Geobacter sulfurreducens</i>     | MgtE integral membrane protein                                                                                                           |
| 17   | 1165  | 0.04      | Q747C7     | <i>Geobacter sulfurreducens</i>     | 60 kDa chaperonin (GroEL protein) (Protein Cpn60)                                                                                        |
| 18   | 1164  | 0.04      | A0A0L8ETQ7 | <i>Achromobacter sp.</i>            | Uncharacterized protein                                                                                                                  |
| 19   | 1115  | 0.04      | Q39RM9     | <i>Geobacter metallireducens</i>    | Membrane protein, putative                                                                                                               |
| 20   | 1111  | 0.04      |            |                                     |                                                                                                                                          |
| 21   | 1080  | 0.04      | E8WU24     | <i>Geobacter sp.</i>                | Helicase domain protein                                                                                                                  |
| 22   | 1079  | 0.04      | A1AKK8     | <i>Pelobacter propionicus</i>       | Uncharacterized protein                                                                                                                  |
| 23   | 1076  | 0.04      | Q748Y8     | <i>Geobacter sulfurreducens</i>     | Elongation factor G 2 (EF-G 2)                                                                                                           |
| 24   | 1073  | 0.04      |            |                                     |                                                                                                                                          |
| 25   | 1072  | 0.04      | A0A1F9PUK4 | <i>Desulfuromonadales bacterium</i> | Methyltransferase (EC 2.1.1.-)                                                                                                           |
| 26   | 1056  | 0.04      | Q39QB9     | <i>Geobacter metallireducens</i>    | NADH dehydrogenase I, M subunit                                                                                                          |
| 27   | 1025  | 0.04      | Q747X9     | <i>Geobacter sulfurreducens</i>     | Isoleucine--tRNA ligase (EC 6.1.1.5) (Isoleucyl-tRNA synthetase) (IleRS)                                                                 |
| 28   | 995   | 0.03      | A5GAB4     | <i>Geobacter uraniireducens</i>     | Putative GAF sensor protein                                                                                                              |
| 29   | 990   | 0.03      | Q39U60     | <i>Geobacter metallireducens</i>    | Translation elongation factor G                                                                                                          |
| 30   | 973   | 0.03      | Q39QB2     | <i>Geobacter metallireducens</i>    | NADH dehydrogenase I, F subunit                                                                                                          |
| 31   | 943   | 0.03      | Q39QB8     | <i>Geobacter metallireducens</i>    | NADH dehydrogenase I, L subunit                                                                                                          |
| 32   | 943   | 0.03      |            |                                     |                                                                                                                                          |

|    |     |      |            |                                      |                                                                                                                                                                                                                                                                                                                                                    |
|----|-----|------|------------|--------------------------------------|----------------------------------------------------------------------------------------------------------------------------------------------------------------------------------------------------------------------------------------------------------------------------------------------------------------------------------------------------|
| 33 | 934 | 0.03 | A0A0B4XMH5 | <i>Alcanivorax pacificus</i>         | Adenine-specific DNA methylase containing a Zn-ribbon                                                                                                                                                                                                                                                                                              |
| 34 | 933 | 0.03 | Q39ZC8     | <i>Geobacter metallireducens</i>     | Ferredoxin-dependent glutamate synthase                                                                                                                                                                                                                                                                                                            |
| 35 | 928 | 0.03 |            |                                      |                                                                                                                                                                                                                                                                                                                                                    |
| 36 | 922 | 0.03 | A0A0B5BF68 | <i>Geobacter pickeringii</i>         | CRISPR-associated protein Cas3                                                                                                                                                                                                                                                                                                                     |
| 37 | 911 | 0.03 | I9R3U4     | <i>Bacteroides cellulosilyticus</i>  | Uncharacterized protein                                                                                                                                                                                                                                                                                                                            |
| 38 | 908 | 0.03 | Q39YK5     | <i>Geobacter metallireducens</i>     | Flagellar biogenesis protein FlhA                                                                                                                                                                                                                                                                                                                  |
| 39 | 907 | 0.03 | A0A1G0M9J2 | <i>Geobacteraceae bacterium</i>      | Uncharacterized protein                                                                                                                                                                                                                                                                                                                            |
| 40 | 885 | 0.03 | Q74FK9     | <i>Geobacter sulfurreducens</i>      | Sigma-54-dependent transcriptional response regulator                                                                                                                                                                                                                                                                                              |
| 41 | 884 | 0.03 | B3EB58     | <i>Geobacter lovleyi</i>             | Uncharacterized protein                                                                                                                                                                                                                                                                                                                            |
| 42 | 879 | 0.03 | Q749A7     | <i>Geobacter sulfurreducens</i>      | Protein translocase subunit SecY                                                                                                                                                                                                                                                                                                                   |
| 43 | 873 | 0.03 | A0A0B5BJ81 | <i>Geobacter pickeringii</i>         | NADH-quinone oxidoreductase subunit D (EC 1.6.5.11) (NADH dehydrogenase I subunit D) (NDH-1 subunit D)                                                                                                                                                                                                                                             |
| 44 | 853 | 0.03 | Q39ZK4     | <i>Geobacter metallireducens</i>     | Bifunctional glutamine synthetase adenylyltransferase/adenylyl-removing enzyme (ATP:glutamine synthetase adenylyltransferase) (ATase) [Includes: Glutamine synthetase adenylyl-L-tyrosine phosphorylase (EC 2.7.7.89) (Adenylyl removase) (AR) (AT-N); Glutamine synthetase adenylyl transferase (EC 2.7.7.42) (Adenylyl transferase) (AT) (AT-C)] |
| 45 | 845 | 0.03 | A0A0B5BF21 | <i>Geobacter pickeringii</i>         | Glycosyl transferase family 1                                                                                                                                                                                                                                                                                                                      |
| 46 | 842 | 0.03 | Q39XL9     | <i>Geobacter metallireducens</i>     | Sensor sigma-54-dependent transcriptional regulator, GAF and GAF domain-containing                                                                                                                                                                                                                                                                 |
| 47 | 837 | 0.03 | N8ZNX3     | <i>Acinetobacter gernerii</i>        | Uncharacterized protein                                                                                                                                                                                                                                                                                                                            |
| 48 | 823 | 0.03 | A0A4W3     | <i>Geobacter sulfurreducens</i>      | Biosynthetic arginine decarboxylase (ADC) (EC 4.1.1.19)                                                                                                                                                                                                                                                                                            |
| 49 | 815 | 0.03 | S0G1I5     | <i>Desulfotignum phosphitoxidans</i> | Type I restriction enzyme HindVIIP/EcoKI protein HsdR (EC 3.1.21.3)                                                                                                                                                                                                                                                                                |
| 50 | 809 | 0.03 | Q39T74     | <i>Geobacter metallireducens</i>     | GTP/GDP 3'-pyrophosphokinase and (P)ppGpp 3'-pyrophosphohydrolase                                                                                                                                                                                                                                                                                  |
| 51 | 808 | 0.03 | Q74FM6     | <i>Geobacter sulfurreducens</i>      | Pyruvate, phosphate dikinase (EC 2.7.9.1)                                                                                                                                                                                                                                                                                                          |
| 52 | 796 | 0.03 | A0A0D5N448 | <i>Geobacter sulfurreducens</i>      | Transposase                                                                                                                                                                                                                                                                                                                                        |
| 53 | 794 | 0.03 | Q74FF1     | <i>Geobacter sulfurreducens</i>      | Chaperone protein ClpB                                                                                                                                                                                                                                                                                                                             |
| 54 | 792 | 0.03 | Q39Y76     | <i>Geobacter metallireducens</i>     | Sigma-54-dependent transcriptional response regulator                                                                                                                                                                                                                                                                                              |
| 55 | 790 | 0.03 | A0A1S0XXD8 | <i>Rhodanobacter sp.</i>             | Histidine kinase                                                                                                                                                                                                                                                                                                                                   |
| 56 | 790 | 0.03 | Q39V52     | <i>Geobacter metallireducens</i>     | GAF sensor methyl-accepting chemotaxis sensory transducer, class 40H                                                                                                                                                                                                                                                                               |
| 57 | 786 | 0.03 | A0A0B5BDJ5 | <i>Geobacter pickeringii</i>         | NADH-quinone oxidoreductase subunit H (EC 1.6.5.11) (NADH dehydrogenase I subunit H) (NDH-1 subunit H)                                                                                                                                                                                                                                             |
| 58 | 785 | 0.03 | Q39QJ8     | <i>Geobacter metallireducens</i>     | Flagellar biogenesis master sigma-54-dependent transcriptional response regulator                                                                                                                                                                                                                                                                  |
| 59 | 781 | 0.03 | A0A0S8I0Q8 | <i>bacterium SM23_31</i>             | Uncharacterized protein                                                                                                                                                                                                                                                                                                                            |
| 60 | 775 | 0.03 | Q747H5     | <i>Geobacter sulfurreducens</i>      | K(+)-insensitive pyrophosphate-energized proton pump (EC 3.6.1.1) (Membrane-bound proton-translocating pyrophosphatase) (Pyrophosphate-energized inorganic pyrophosphatase) (H(+)-PPase)                                                                                                                                                           |
| 61 | 768 | 0.03 | A0A0B5B8A8 | <i>Geobacter pickeringii</i>         | Valine--tRNA ligase (EC 6.1.1.9) (Valyl-tRNA synthetase) (ValRS)                                                                                                                                                                                                                                                                                   |

|    |     |      |            |                                     |                                                                                                            |
|----|-----|------|------------|-------------------------------------|------------------------------------------------------------------------------------------------------------|
| 62 | 765 | 0.03 | A0A0B5BCT5 | <i>Geobacter pickeringii</i>        | NADH dehydrogenase                                                                                         |
| 63 | 756 | 0.03 | Q39UR9     | <i>Geobacter metallireducens</i>    | Carbamoyl-phosphate synthase large chain (EC 6.3.5.5) (Carbamoyl-phosphate synthetase ammonia chain)       |
| 64 | 756 | 0.03 |            |                                     |                                                                                                            |
| 65 | 755 | 0.03 |            |                                     |                                                                                                            |
| 66 | 739 | 0.03 | Q39PS2     | <i>Geobacter metallireducens</i>    | Transcription-repair-coupling factor (TRCF) (EC 3.6.4.-)                                                   |
| 67 | 737 | 0.03 | Q39ZE7     | <i>Geobacter metallireducens</i>    | UvrABC system protein A (UvrA protein) (Excinuclease ABC subunit A)                                        |
| 68 | 736 | 0.03 | A0A0B5B7H3 | <i>Geobacter pickeringii</i>        | Cytochrome C                                                                                               |
| 69 | 730 | 0.03 | Q74GY2     | <i>Geobacter sulfurreducens</i>     | ATP synthase subunit alpha (EC 3.6.3.14) (ATP synthase F1 sector subunit alpha) (F-ATPase subunit alpha)   |
| 70 | 729 | 0.03 | C6DZ95     | <i>Geobacter sp.</i>                | Lytic transglycosylase catalytic                                                                           |
| 71 | 726 | 0.03 | Q747M6     | <i>Geobacter sulfurreducens</i>     | Ribonuclease G                                                                                             |
| 72 | 725 | 0.03 | A1AKN8     | <i>Pelobacter propionicus</i>       | Resolvase, N-terminal domain protein                                                                       |
| 73 | 722 | 0.02 | Q39U54     | <i>Geobacter metallireducens</i>    | Sensor histidine kinase cyclic nucleotide phosphodiesterase, GAF, GAF and HD-GYP-related domain-containing |
| 74 | 719 | 0.02 | P14243     | <i>Citrobacter freundii</i>         | Modification methylase Cfr9I (M.Cfr9I) (EC 2.1.1.113) (N(4)- cytosine-specific methyltransferase Cfr9I)    |
| 75 | 718 | 0.02 | A0A0C5IZ87 | <i>Rugosibacter aromaticivorans</i> | Uncharacterized protein                                                                                    |
| 76 | 713 | 0.02 | A0A0D5ND20 | <i>Geobacter sulfurreducens</i>     | Amino acid dehydrogenase                                                                                   |
| 77 | 712 | 0.02 | E1QK39     | <i>Desulfarculus baarsii</i>        | Helicase domain protein                                                                                    |
| 78 | 704 | 0.02 | Q74C76     | <i>Geobacter sulfurreducens</i>     | (R)-citramalate synthase (EC 2.3.1.182) (Citramalate synthase)                                             |
| 79 | 703 | 0.02 | A0A0D5N8S3 | <i>Geobacter sulfurreducens</i>     | NADH dehydrogenase                                                                                         |
| 80 | 700 | 0.02 | A0A0D5N8I5 | <i>Geobacter sulfurreducens</i>     | Signal recognition particle protein (Fifty-four homolog)                                                   |
| 81 | 699 | 0.02 | Q74GY0     | <i>Geobacter sulfurreducens</i>     | ATP synthase subunit beta (EC 3.6.3.14) (ATP synthase F1 sector subunit beta) (F-ATPase subunit beta)      |
| 82 | 699 | 0.02 | Q74H58     | <i>Geobacter sulfurreducens</i>     | Chaperone protein DnaJ                                                                                     |
| 83 | 696 | 0.02 | A0A0B5BH93 | <i>Geobacter pickeringii</i>        | C-and b-type cytochrome L                                                                                  |
| 84 | 696 | 0.02 | Q39ST0     | <i>Geobacter metallireducens</i>    | Fibronectin type III repeat, DUF2341 repeat and LamG-like domain protein                                   |
| 85 | 695 | 0.02 |            |                                     |                                                                                                            |
| 86 | 691 | 0.02 | Q746X3     | <i>Geobacter sulfurreducens</i>     | Bifunctional protein PutA                                                                                  |
| 87 | 690 | 0.02 |            |                                     |                                                                                                            |
| 88 | 687 | 0.02 | A0A0B5BJ46 | <i>Geobacter pickeringii</i>        | Uncharacterized protein                                                                                    |
| 89 | 684 | 0.02 | A0A0B5BJ26 | <i>Geobacter pickeringii</i>        | Uncharacterized protein                                                                                    |
| 90 | 684 | 0.02 | Q39WG2     | <i>Geobacter metallireducens</i>    | Chromosome partition protein Smc                                                                           |
| 91 | 681 | 0.02 | B4S9K8     | <i>Prosthecochloris aestuarii</i>   | TRAG family protein                                                                                        |
| 92 | 681 | 0.02 | Q74AK3     | <i>Geobacter sulfurreducens</i>     | Cation-translocating P-type ATPase                                                                         |

|     |     |      |            |                                         |                                                                                                                                                                                                                                                                                                                          |
|-----|-----|------|------------|-----------------------------------------|--------------------------------------------------------------------------------------------------------------------------------------------------------------------------------------------------------------------------------------------------------------------------------------------------------------------------|
| 93  | 672 | 0.02 |            |                                         |                                                                                                                                                                                                                                                                                                                          |
| 94  | 669 | 0.02 | Q39W73     | <i>Geobacter metallireducens</i>        | 2-isopropylmalate synthase (EC 2.3.3.13) (Alpha-IPM synthase) (Alpha-isopropylmalate synthase)                                                                                                                                                                                                                           |
| 95  | 668 | 0.02 | Q39Q36     | <i>Geobacter metallireducens</i>        | Heterodisulfide oxidoreductase, FAD-binding and iron-sulfur cluster-binding subunit A                                                                                                                                                                                                                                    |
| 96  | 667 | 0.02 | Q39VR4     | <i>Geobacter metallireducens</i>        | Bifunctional uridylyltransferase/uridylyl-removing enzyme (UTase/UR) (Bifunctional [protein-PII] modification enzyme) (Bifunctional nitrogen sensor protein) [Includes: [Protein-PII]-UMP uridylyl-removing enzyme (UR) (EC 3.1.4.-); [Protein-PII] uridylyltransferase (PII uridylyltransferase) (UTase) (EC 2.7.7.59)] |
| 97  | 666 | 0.02 | AOA0B5BB65 | <i>Geobacter pickeringii</i>            | Uncharacterized protein                                                                                                                                                                                                                                                                                                  |
| 98  | 664 | 0.02 | AOA0R3QEE4 | <i>Brugia timori</i>                    | Uncharacterized protein                                                                                                                                                                                                                                                                                                  |
| 99  | 663 | 0.02 | AOA0D5NDD6 | <i>Geobacter sulfurreducens</i>         | Type II secretion system protein E                                                                                                                                                                                                                                                                                       |
| 100 | 661 | 0.02 | Q39X91     | <i>Geobacter metallireducens</i>        | DNA topoisomerase 1 (EC 5.99.1.2) (DNA topoisomerase I)                                                                                                                                                                                                                                                                  |
| 101 | 660 | 0.02 | A0LQ17     | <i>Syntrophobacter fumaroxidans</i>     | Helicase domain protein                                                                                                                                                                                                                                                                                                  |
| 102 | 658 | 0.02 | Q74FW2     | <i>Geobacter sulfurreducens</i>         | Succinyl:acetate coenzyme A transferase                                                                                                                                                                                                                                                                                  |
| 103 | 657 | 0.02 | Q74H82     | <i>Geobacter sulfurreducens</i>         | Flagellar biogenesis master response receiver sensor histidine kinase, PAS and GAF domain-containing                                                                                                                                                                                                                     |
| 104 | 655 | 0.02 | Q39QB3     | <i>Geobacter metallireducens</i>        | NADH dehydrogenase I, G subunit                                                                                                                                                                                                                                                                                          |
| 105 | 654 | 0.02 | AOA0D5NE26 | <i>Geobacter sulfurreducens</i>         | Multidrug resistance protein B                                                                                                                                                                                                                                                                                           |
| 106 | 654 | 0.02 | Q39QU2     | <i>Geobacter metallireducens</i>        | Phosphoenolpyruvate carboxykinase (ATP) (PCK) (PEP carboxykinase) (PEPCK) (EC 4.1.1.49)                                                                                                                                                                                                                                  |
| 107 | 654 | 0.02 | Q39R25     | <i>Geobacter metallireducens</i>        | Sensor diguanylate cyclase/phosphodiesterase, PAS, PAS and PAS domain-containing                                                                                                                                                                                                                                         |
| 108 | 653 | 0.02 | G2J999     | <i>Cand. Glomeribacter gigasporarum</i> | TRAG family protein                                                                                                                                                                                                                                                                                                      |
| 109 | 652 | 0.02 |            |                                         |                                                                                                                                                                                                                                                                                                                          |
| 110 | 651 | 0.02 |            |                                         |                                                                                                                                                                                                                                                                                                                          |
| 111 | 650 | 0.02 | AOA0D5N8G6 | <i>Geobacter sulfurreducens</i>         | Cation transporter                                                                                                                                                                                                                                                                                                       |
| 112 | 648 | 0.02 | AOA0B5BK17 | <i>Geobacter pickeringii</i>            | Diguanylate cyclase                                                                                                                                                                                                                                                                                                      |
| 113 | 647 | 0.02 | AOA0D5N712 | <i>Geobacter sulfurreducens</i>         | Phosphoglucomutase                                                                                                                                                                                                                                                                                                       |
| 114 | 643 | 0.02 | Q39QP7     | <i>Geobacter metallireducens</i>        | Lon protease (EC 3.4.21.53) (ATP-dependent protease La)                                                                                                                                                                                                                                                                  |
| 115 | 643 | 0.02 | U2TE33     | <i>Mitsuokella sp.</i>                  | DNA topoisomerase                                                                                                                                                                                                                                                                                                        |
| 116 | 642 | 0.02 | AOA0D5NDJ8 | <i>Geobacter sulfurreducens</i>         | Stage II sporulation protein E                                                                                                                                                                                                                                                                                           |
| 117 | 641 | 0.02 | Q74FD5     | <i>Geobacter sulfurreducens</i>         | Hydroxylamine reductase (EC 1.7.99.1) (Hybrid-cluster protein) (HCP) (Prismane protein)                                                                                                                                                                                                                                  |
| 118 | 640 | 0.02 | Q39RI3     | <i>Geobacter metallireducens</i>        | Sensor histidine kinase, HAMP domain-containing, 2 heme-binding sites                                                                                                                                                                                                                                                    |
| 119 | 639 | 0.02 | B5EFV6     | <i>Geobacter bemidjensis</i>            | Bifunctional protein PutA                                                                                                                                                                                                                                                                                                |
| 120 | 637 | 0.02 | AOA0D5N2P4 | <i>Geobacter sulfurreducens</i>         | Uncharacterized protein                                                                                                                                                                                                                                                                                                  |
| 121 | 637 | 0.02 | AOA1T4RHG2 | <i>Geobacter thiogenes</i>              | Nif-specific regulatory protein                                                                                                                                                                                                                                                                                          |
| 122 | 636 | 0.02 |            |                                         |                                                                                                                                                                                                                                                                                                                          |



|     |     |      |            |                                  |                                                                                                                                                                                                                                                                                                                          |
|-----|-----|------|------------|----------------------------------|--------------------------------------------------------------------------------------------------------------------------------------------------------------------------------------------------------------------------------------------------------------------------------------------------------------------------|
| 123 | 631 | 0.02 | B3E9R4     | <i>Geobacter lovleyi</i>         | Isocitrate dehydrogenase, NADP-dependent (EC 1.1.1.42)                                                                                                                                                                                                                                                                   |
| 124 | 631 | 0.02 | Q39QJ5     | <i>Geobacter metallireducens</i> | Sensor histidine kinase CheA associated with MCPs of classes 40H and 40+24H                                                                                                                                                                                                                                              |
| 125 | 630 | 0.02 | A0A0B5BH05 | <i>Geobacter pickeringii</i>     | Malic enzyme (EC 1.1.1.40)                                                                                                                                                                                                                                                                                               |
| 126 | 624 | 0.02 | Q39UH4     | <i>Geobacter metallireducens</i> | Lon protease (EC 3.4.21.53) (ATP-dependent protease La)                                                                                                                                                                                                                                                                  |
| 127 | 622 | 0.02 | A0A059GCP4 | <i>Hyphomonas oceanitis</i>      | Conjugal transfer protein TraG                                                                                                                                                                                                                                                                                           |
| 128 | 622 | 0.02 | P61679     | <i>Geobacter sulfurreducens</i>  | UDP-N-acetylmuramate--L-alanine ligase (EC 6.3.2.8) (UDP-N-acetylmuramoyl-L-alanine synthetase)                                                                                                                                                                                                                          |
| 129 | 619 | 0.02 | Q39WU2     | <i>Geobacter metallireducens</i> | Phosphate-selective outer membrane channel                                                                                                                                                                                                                                                                               |
| 130 | 617 | 0.02 | A0A0B5BCZ8 | <i>Geobacter pickeringii</i>     | Succinate dehydrogenase (EC 1.3.5.1)                                                                                                                                                                                                                                                                                     |
| 131 | 617 | 0.02 | A0A0B5BI89 | <i>Geobacter pickeringii</i>     | Type II secretion system protein                                                                                                                                                                                                                                                                                         |
| 132 | 617 | 0.02 | A0A0L8EU90 | <i>Achromobacter sp.</i>         | Uncharacterized protein                                                                                                                                                                                                                                                                                                  |
| 133 | 616 | 0.02 | A0A0D5ND99 | <i>Geobacter sulfurreducens</i>  | ATPase AAA                                                                                                                                                                                                                                                                                                               |
| 134 | 616 | 0.02 | A0A174BLS6 | <i>Mitsuokella jalaludinii</i>   | DNA topoisomerase 3 (EC 5.99.1.2)                                                                                                                                                                                                                                                                                        |
| 135 | 616 | 0.02 | Q749N5     | <i>Geobacter sulfurreducens</i>  | Acetate kinase (EC 2.7.2.1) (Acetokinase)                                                                                                                                                                                                                                                                                |
| 136 | 615 | 0.02 | Q748Z4     | <i>Geobacter sulfurreducens</i>  | 30S ribosomal protein S3                                                                                                                                                                                                                                                                                                 |
| 137 | 607 | 0.02 | Q74GG6     | <i>Geobacter sulfurreducens</i>  | Chromosomal replication initiator protein DnaA                                                                                                                                                                                                                                                                           |
| 138 | 607 | 0.02 | Q39QY3     | <i>Geobacter metallireducens</i> | Efflux pump, RND family, inner membrane protein                                                                                                                                                                                                                                                                          |
| 139 | 604 | 0.02 | A0A0A8WN28 | <i>Geobacter sp.</i>             | Protein TraN                                                                                                                                                                                                                                                                                                             |
| 140 | 602 | 0.02 | Q39SJ2     | <i>Geobacter metallireducens</i> | Nitrogen fixation master sigma-54-dependent transcriptional response regulator                                                                                                                                                                                                                                           |
| 141 | 599 | 0.02 | A0A0D5N8Q2 | <i>Geobacter sulfurreducens</i>  | Uncharacterized protein                                                                                                                                                                                                                                                                                                  |
| 142 | 599 | 0.02 | Q39XG6     | <i>Geobacter metallireducens</i> | Pyruvate carboxylase (EC 6.4.1.1)                                                                                                                                                                                                                                                                                        |
| 143 | 599 | 0.02 | Q74DL9     | <i>Geobacter sulfurreducens</i>  | Transposase of ISGsu2, IS5 family                                                                                                                                                                                                                                                                                        |
| 144 | 597 | 0.02 | Q39UA2     | <i>Geobacter metallireducens</i> | Adenylosuccinate lyase (ASL) (EC 4.3.2.2) (Adenylosuccinase)                                                                                                                                                                                                                                                             |
| 145 | 594 | 0.02 | A0A178FWP5 | <i>Acinetobacter sp.</i>         | Transposase                                                                                                                                                                                                                                                                                                              |
| 146 | 592 | 0.02 | A0A0B5BHV9 | <i>Geobacter pickeringii</i>     | ATPase AAA                                                                                                                                                                                                                                                                                                               |
| 147 | 590 | 0.02 | A0A0B5BDG1 | <i>Geobacter pickeringii</i>     | tRNA uridine 5-carboxymethylaminomethyl modification enzyme MnmG (Glucose-inhibited division protein A)                                                                                                                                                                                                                  |
| 148 | 590 | 0.02 | A0A0D5NAK5 | <i>Geobacter sulfurreducens</i>  | Bifunctional uridylyltransferase/uridylyl-removing enzyme (UTase/UR) (Bifunctional [protein-P1I] modification enzyme) (Bifunctional nitrogen sensor protein) [Includes: [Protein-P1I]-UMP uridylyl-removing enzyme (UR) (EC 3.1.4.-); [Protein-P1I] uridylyltransferase (P1I uridylyltransferase) (UTase) (EC 2.7.7.59)] |
| 149 | 589 | 0.02 | A0A0D5N7M4 | <i>Geobacter sulfurreducens</i>  | Chemotaxis protein                                                                                                                                                                                                                                                                                                       |
| 150 | 589 | 0.02 | Q39RQ5     | <i>Geobacter metallireducens</i> | Chaperone protein ClpB                                                                                                                                                                                                                                                                                                   |
| 151 | 589 | 0.02 | Q74B77     | <i>Geobacter sulfurreducens</i>  | Uncharacterized protein                                                                                                                                                                                                                                                                                                  |
| 152 | 588 | 0.02 | A0A1G0M577 | <i>Geobacteraceae bacterium</i>  | Uncharacterized protein                                                                                                                                                                                                                                                                                                  |
| 153 | 586 | 0.02 | A0A0D5N7R7 | <i>Geobacter sulfurreducens</i>  | GntR family transcriptional regulator                                                                                                                                                                                                                                                                                    |

|     |     |      |            |                                  |                                                                                                                                                                                                                                                            |
|-----|-----|------|------------|----------------------------------|------------------------------------------------------------------------------------------------------------------------------------------------------------------------------------------------------------------------------------------------------------|
| 154 | 584 | 0.02 | A0A0A8WPS5 | <i>Geobacter sp.</i>             | Efflux pump membrane transporter                                                                                                                                                                                                                           |
| 155 | 582 | 0.02 | A0A0D5N8E2 | <i>Geobacter sulfurreducens</i>  | ATP synthase (EC 3.6.3.14)                                                                                                                                                                                                                                 |
| 156 | 581 | 0.02 | A0A0D5NCW1 | <i>Geobacter sulfurreducens</i>  | Histidine kinase                                                                                                                                                                                                                                           |
| 157 | 579 | 0.02 | A5GB28     | <i>Geobacter uraniiireducens</i> | Plasmid maintenance system antidote protein, XRE family                                                                                                                                                                                                    |
| 158 | 579 | 0.02 | Q39QN4     | <i>Geobacter metallireducens</i> | Pentapeptide repeat protein                                                                                                                                                                                                                                |
| 159 | 578 | 0.02 | Q749H1     | <i>Geobacter sulfurreducens</i>  | Transposase of ISGsu3, IS5 family                                                                                                                                                                                                                          |
| 160 | 572 | 0.02 | Q39YR4     | <i>Geobacter metallireducens</i> | FtsK/SpoIIIE domain protein                                                                                                                                                                                                                                |
| 161 | 572 | 0.02 |            |                                  |                                                                                                                                                                                                                                                            |
| 162 | 571 | 0.02 | A0A0B5BE38 | <i>Geobacter pickeringii</i>     | Transcription-repair-coupling factor (TRCF) (EC 3.6.4.-)                                                                                                                                                                                                   |
| 163 | 570 | 0.02 | Q39ZQ2     | <i>Geobacter metallireducens</i> | Uncharacterized protein                                                                                                                                                                                                                                    |
| 164 | 569 | 0.02 | Q39RM8     | <i>Geobacter metallireducens</i> | Glycosyltransferase                                                                                                                                                                                                                                        |
| 165 | 568 | 0.02 | Q39SI5     | <i>Geobacter metallireducens</i> | Fumarate hydratase class I (EC 4.2.1.2)                                                                                                                                                                                                                    |
| 166 | 567 | 0.02 | A0A0B5BIS9 | <i>Geobacter pickeringii</i>     | Multidrug transporter AcrB                                                                                                                                                                                                                                 |
| 167 | 564 | 0.02 | Q746S4     | <i>Geobacter sulfurreducens</i>  | NADH-quinone oxidoreductase subunit B/C/D (EC 1.6.5.11) (NADH dehydrogenase I subunit B/C/D) (NDH-1 subunit B/C/D)                                                                                                                                         |
| 168 | 563 | 0.02 | P60789     | <i>Geobacter sulfurreducens</i>  | Elongation factor 4 (EF-4) (EC 3.6.5.n1) (Ribosomal back-translocase LepA)                                                                                                                                                                                 |
| 169 | 562 | 0.02 | Q39ZH1     | <i>Geobacter metallireducens</i> | Glutamine--fructose-6-phosphate aminotransferase [isomerizing] (EC 2.6.1.16) (D-fructose-6-phosphate amidotransferase) (GFAT) (Glucosamine-6-phosphate synthase) (Hexosephosphate aminotransferase) (L-glutamine--D-fructose-6-phosphate amidotransferase) |
| 170 | 562 | 0.02 | Q3A5L6     | <i>Pelobacter carbinolicus</i>   | Uncharacterized protein                                                                                                                                                                                                                                    |
| 171 | 562 | 0.02 | Q74H49     | <i>Geobacter sulfurreducens</i>  | Uncharacterized protein                                                                                                                                                                                                                                    |
| 172 | 559 | 0.02 | Q39X49     | <i>Geobacter metallireducens</i> | Dystroglycan-type cadherin-like domain repeat protein                                                                                                                                                                                                      |
| 173 | 557 | 0.02 | A0A0B5BDE2 | <i>Geobacter pickeringii</i>     | ATP phosphoribosyltransferase regulatory subunit                                                                                                                                                                                                           |
| 174 | 556 | 0.02 | Q39ZL2     | <i>Geobacter metallireducens</i> | TrkA domain protein                                                                                                                                                                                                                                        |
| 175 | 555 | 0.02 | Q39VY8     | <i>Geobacter metallireducens</i> | Glutamine synthetase (EC 6.3.1.2)                                                                                                                                                                                                                          |
| 176 | 554 | 0.02 | A0A0D5N5P7 | <i>Geobacter sulfurreducens</i>  | Chemotaxis protein                                                                                                                                                                                                                                         |
| 177 | 554 | 0.02 | A0A1G0LHM5 | <i>Geobacteraceae bacterium</i>  | Conjugal transfer protein TrbE                                                                                                                                                                                                                             |
| 178 | 552 | 0.02 | Q39XB5     | <i>Geobacter metallireducens</i> | 30S ribosomal protein S1                                                                                                                                                                                                                                   |
| 179 | 551 | 0.02 | B5EGM4     | <i>Geobacter bemidjiensis</i>    | Glycerol/1,2-propanediol dehydratase                                                                                                                                                                                                                       |
| 180 | 550 | 0.02 | A5G9A7     | <i>Geobacter uraniiireducens</i> | NADH dehydrogenase subunit M (EC 1.6.5.3)                                                                                                                                                                                                                  |
| 181 | 549 | 0.02 | Q39XC1     | <i>Geobacter metallireducens</i> | PilB/PulE/GspE family ATPase                                                                                                                                                                                                                               |
| 182 | 547 | 0.02 | Q39T42     | <i>Geobacter metallireducens</i> | Outer membrane protein assembly factor BamA                                                                                                                                                                                                                |
| 183 | 546 | 0.02 | Q39QT7     | <i>Geobacter metallireducens</i> | Cytochrome c                                                                                                                                                                                                                                               |
| 184 | 545 | 0.02 | Q39ZI6     | <i>Geobacter metallireducens</i> | DNA helicase (EC 3.6.4.12)                                                                                                                                                                                                                                 |
| 185 | 544 | 0.02 | A0A0D5N711 | <i>Geobacter sulfurreducens</i>  | NADH-quinone oxidoreductase subunit N (EC 1.6.5.11) (NADH dehydrogenase I subunit N) (NDH-1 subunit N)                                                                                                                                                     |

|     |     |      |            |                                  |                                                                                                                                          |
|-----|-----|------|------------|----------------------------------|------------------------------------------------------------------------------------------------------------------------------------------|
| 186 | 544 | 0.02 | A5GFJ7     | <i>Geobacter uraniiireducens</i> | Erythronolide synthase (EC 2.3.1.94)                                                                                                     |
| 187 | 544 | 0.02 | B3EB49     | <i>Geobacter lovleyi</i>         | Uncharacterized protein                                                                                                                  |
| 188 | 544 | 0.02 | Q74C83     | <i>Geobacter sulfurreducens</i>  | ATP-dependent Clp protease ATP-binding subunit ClpX                                                                                      |
| 189 | 542 | 0.02 | Q39UG5     | <i>Geobacter metallireducens</i> | Aspartokinase (EC 2.7.2.4)                                                                                                               |
| 190 | 541 | 0.02 | Q74C70     | <i>Geobacter sulfurreducens</i>  | Phosphoglucosamine mutase (EC 5.4.2.10)                                                                                                  |
| 191 | 540 | 0.02 | AOA0D5N400 | <i>Geobacter sulfurreducens</i>  | Uncharacterized protein                                                                                                                  |
| 192 | 540 | 0.02 | AOA0D5N7N0 | <i>Geobacter sulfurreducens</i>  | Glutamate synthase                                                                                                                       |
| 193 | 540 | 0.02 | Q74CR5     | <i>Geobacter sulfurreducens</i>  | Serine hydroxymethyltransferase (SHMT) (Serine methylase) (EC 2.1.2.1)                                                                   |
| 194 | 540 | 0.02 | Q39WC2     | <i>Geobacter metallireducens</i> | DNA-directed DNA polymerase (EC 2.7.7.7)                                                                                                 |
| 195 | 538 | 0.02 | A5GF11     | <i>Geobacter uraniiireducens</i> | Acetyl-CoA carboxylase carboxyltransferase subunit alpha (EC 6.3.4.14)                                                                   |
| 196 | 538 | 0.02 | A5GAY2     | <i>Geobacter uraniiireducens</i> | DNA-directed RNA polymerase subunit beta' (RNAP subunit beta') (EC 2.7.7.6) (RNA polymerase subunit beta') (Transcriptase subunit beta') |
| 197 | 536 | 0.02 | AOA0B5BAC1 | <i>Geobacter pickeringii</i>     | Dihydrolipoyl dehydrogenase (EC 1.8.1.4)                                                                                                 |
| 198 | 536 | 0.02 | Q74GT3     | <i>Geobacter sulfurreducens</i>  | LL-diaminopimelate aminotransferase (DAP-AT) (DAP-aminotransferase) (LL-DAP-aminotransferase) (EC 2.6.1.83)                              |
| 199 | 534 | 0.02 | Q39QD0     | <i>Geobacter metallireducens</i> | Periplasmically oriented, membrane-bound [NiFe]-hydrogenase, large subunit                                                               |
| 200 | 534 | 0.02 | Q74AJ5     | <i>Geobacter sulfurreducens</i>  | Glycoside hydrolase, family 57, DUF3536 domain-containing                                                                                |
| 201 | 533 | 0.02 | Q39Y82     | <i>Geobacter metallireducens</i> | 5-methyltetrahydrofolate--homocysteine S-methyltransferase, cobalamin-dependent                                                          |
| 202 | 532 | 0.02 | AOA0C1TL30 | <i>Geobacter soli</i>            | Flagellar basal body stator protein MotB                                                                                                 |
| 203 | 532 | 0.02 | AOA0D5N2S0 | <i>Geobacter sulfurreducens</i>  | Uncharacterized protein                                                                                                                  |
| 204 | 531 | 0.02 | A5GAY1     | <i>Geobacter uraniiireducens</i> | DNA-directed RNA polymerase subunit beta (RNAP subunit beta) (EC 2.7.7.6) (RNA polymerase subunit beta) (Transcriptase subunit beta)     |
| 205 | 528 | 0.02 | Q39VY0     | <i>Geobacter metallireducens</i> | Malate dehydrogenase (EC 1.1.1.37)                                                                                                       |
| 206 | 527 | 0.02 | AOA0B5BIQ7 | <i>Geobacter pickeringii</i>     | Flagellar basal-body rod protein FlgF (Flagellar hook protein FlgE)                                                                      |
| 207 | 526 | 0.02 | AOA0B5BD43 | <i>Geobacter pickeringii</i>     | ABC transporter permease                                                                                                                 |
| 208 | 525 | 0.02 | AOA0B5BK56 | <i>Geobacter pickeringii</i>     | Lon protease (EC 3.4.21.53) (ATP-dependent protease La)                                                                                  |
| 209 | 525 | 0.02 | A5GDX4     | <i>Geobacter uraniiireducens</i> | DNA gyrase subunit B (EC 5.99.1.3)                                                                                                       |
| 210 | 524 | 0.02 |            |                                  |                                                                                                                                          |
| 211 | 523 | 0.02 | AOA1H6GN37 | <i>Selenomonas ruminantium</i>   | DNA topoisomerase-3                                                                                                                      |
| 212 | 523 | 0.02 | Q39QA3     | <i>Geobacter metallireducens</i> | ATP synthase subunit a (ATP synthase F0 sector subunit a) (F-ATPase subunit 6)                                                           |
| 213 | 523 | 0.02 |            |                                  |                                                                                                                                          |
| 214 | 522 | 0.02 | Q39VA1     | <i>Geobacter metallireducens</i> | Polyribonucleotide nucleotidyltransferase (EC 2.7.7.8) (Polynucleotide phosphorylase) (PNPase)                                           |
| 215 | 520 | 0.02 | AOA0C1U608 | <i>Geobacter soli</i>            | Chemotaxis protein                                                                                                                       |
| 216 | 518 | 0.02 | Q39T98     | <i>Geobacter metallireducens</i> | Cytochrome c                                                                                                                             |
| 217 | 518 | 0.02 | Q39Z79     | <i>Geobacter metallireducens</i> | Twitching motility pilus retraction ATPase                                                                                               |
| 218 | 517 | 0.02 | AOA1G0MAK9 | <i>Geobacteraceae bacterium</i>  | Sodium:proton exchanger                                                                                                                  |

|     |     |      |            |                                  |                                                                                                                                                                                                                                    |
|-----|-----|------|------------|----------------------------------|------------------------------------------------------------------------------------------------------------------------------------------------------------------------------------------------------------------------------------|
| 219 | 517 | 0.02 | B3EAX1     | <i>Geobacter lovleyi</i>         | Protein CyaE                                                                                                                                                                                                                       |
| 220 | 517 | 0.02 | Q39W76     | <i>Geobacter metallireducens</i> | Ketol-acid reductoisomerase (NADP(+)) (KARI) (EC 1.1.1.86) (Acetohydroxy-acid isomeroeductase) (AHIR) (Alpha-keto-beta-hydroxylacyl reductoisomerase) (Ketol-acid reductoisomerase type 1) (Ketol-acid reductoisomerase type I)    |
| 221 | 515 | 0.02 | A0A0B5B5Z5 | <i>Geobacter pickeringii</i>     | DNA polymerase III subunit beta (EC 2.7.7.7)                                                                                                                                                                                       |
| 222 | 515 | 0.02 | A0A0D5N952 | <i>Geobacter sulfurreducens</i>  | Flagellar motor switch protein FlIG                                                                                                                                                                                                |
| 223 | 515 | 0.02 | A0A0D5NAW4 | <i>Geobacter sulfurreducens</i>  | Cation transporter                                                                                                                                                                                                                 |
| 224 | 514 | 0.02 | A0A0Q7AWL1 | <i>Nocardioides sp.</i>          | Uncharacterized protein                                                                                                                                                                                                            |
| 225 | 512 | 0.02 | A1AN79     | <i>Pelobacter propionicus</i>    | Adenosylmethionine-8-amino-7-oxononanoate aminotransferase (EC 2.6.1.62) (7,8-diamino-pelargonic acid aminotransferase) (DAPA AT) (DAPA aminotransferase) (7,8-diaminononanoate synthase) (DANS) (Diaminopelargonic acid synthase) |
| 226 | 510 | 0.02 | Q39ZS3     | <i>Geobacter metallireducens</i> | Chromosomal replication initiator protein DnaA                                                                                                                                                                                     |
| 227 | 507 | 0.02 | A0A0B5BIA1 | <i>Geobacter pickeringii</i>     | DNA-directed DNA polymerase (EC 2.7.7.7)                                                                                                                                                                                           |
| 228 | 507 | 0.02 | B9LZR8     | <i>Geobacter daltonii</i>        | Succinyl:acetate coenzyme A transferase                                                                                                                                                                                            |
| 229 | 507 | 0.02 | Q749D7     | <i>Geobacter sulfurreducens</i>  | Nitrogenase molybdenum-iron cofactor biosynthesis protein NifEN                                                                                                                                                                    |
| 230 | 505 | 0.02 | A0A0B5BCH1 | <i>Geobacter pickeringii</i>     | Hydrogenase 2 large subunit (EC 1.12.99.6)                                                                                                                                                                                         |
| 231 | 504 | 0.02 | Q39VA8     | <i>Geobacter metallireducens</i> | Transcription termination/antitermination protein NusA                                                                                                                                                                             |
| 232 | 503 | 0.02 | A5GFJ6     | <i>Geobacter uraniiireducens</i> | Beta-hydroxyacyl-(Acyl-carrier-protein) dehydratase, FabA/FabZ                                                                                                                                                                     |
| 233 | 503 | 0.02 |            |                                  |                                                                                                                                                                                                                                    |
| 234 | 501 | 0.02 | A0A0A8WNZ4 | <i>Geobacter sp.</i>             | DNA gyrase subunit A (EC 5.99.1.3)                                                                                                                                                                                                 |
| 235 | 501 | 0.02 | Q74BC2     | <i>Geobacter sulfurreducens</i>  | Integrative genetic element Gsu56, integrase                                                                                                                                                                                       |
| 236 | 499 | 0.02 | A0A0D5NE46 | <i>Geobacter sulfurreducens</i>  | Molecular chaperone DnaJ                                                                                                                                                                                                           |
| 237 | 497 | 0.02 | A0A0A8WNV3 | <i>Geobacter sp.</i>             | Uncharacterized protein                                                                                                                                                                                                            |
| 238 | 495 | 0.02 | A0A0B5BCL9 | <i>Geobacter pickeringii</i>     | Uncharacterized protein                                                                                                                                                                                                            |
| 239 | 494 | 0.02 | Q39WR2     | <i>Geobacter metallireducens</i> | CRISPR-associated endonuclease Cas1 (EC 3.1.-.-)                                                                                                                                                                                   |
| 240 | 492 | 0.02 | P61667     | <i>Geobacter sulfurreducens</i>  | DNA mismatch repair protein MutS                                                                                                                                                                                                   |
| 241 | 492 | 0.02 | Q74BB9     | <i>Geobacter sulfurreducens</i>  | TraG family protein                                                                                                                                                                                                                |
| 242 | 491 | 0.02 | A0A0B5BB89 | <i>Geobacter pickeringii</i>     | Chromosome partition protein Smc                                                                                                                                                                                                   |
| 243 | 491 | 0.02 | A0A0B5BIF0 | <i>Geobacter pickeringii</i>     | NADH-ubiquinone oxidoreductase subunit 3                                                                                                                                                                                           |
| 244 | 491 | 0.02 | Q39RT7     | <i>Geobacter metallireducens</i> | Efflux pump, RND superfamily, and rRNA methyltransferase, putative                                                                                                                                                                 |
| 245 | 490 | 0.02 | A0A0B5B8F2 | <i>Geobacter pickeringii</i>     | Sodium transporter                                                                                                                                                                                                                 |
| 246 | 490 | 0.02 | Q748V3     | <i>Geobacter sulfurreducens</i>  | Lipoprotein cytochrome c                                                                                                                                                                                                           |
| 247 | 490 | 0.02 | Q74F57     | <i>Geobacter sulfurreducens</i>  | Membrane protein, major facilitator superfamily                                                                                                                                                                                    |
| 248 | 488 | 0.02 | A0A0B5BB11 | <i>Geobacter pickeringii</i>     | Pyruvate carboxylase (EC 6.4.1.1)                                                                                                                                                                                                  |
| 249 | 488 | 0.02 | Q39ZM0     | <i>Geobacter metallireducens</i> | Iron-sulfur cluster-binding sigma-54-dependent transcriptional regulator, FehyIlgC and FeS domain-containing                                                                                                                       |

|     |     |      |            |                                     |                                                                                                     |
|-----|-----|------|------------|-------------------------------------|-----------------------------------------------------------------------------------------------------|
| 250 | 487 | 0.02 | A0A096AIH0 | <i>Veillonella montpellierensis</i> | DNA topoisomerase                                                                                   |
| 251 | 487 | 0.02 | A0A0D5N6Q1 | <i>Geobacter sulfurreducens</i>     | FeS-binding protein                                                                                 |
| 252 | 486 | 0.02 | A0A0B5B668 | <i>Geobacter pickeringii</i>        | Peptidase U32                                                                                       |
| 253 | 486 | 0.02 | A0A0B5BC86 | <i>Geobacter pickeringii</i>        | Multicopper oxidase                                                                                 |
| 254 | 485 | 0.02 | A0R7X1     | <i>Pelobacter propionicus</i>       | Type III restriction enzyme, res subunit                                                            |
| 255 | 485 | 0.02 | Q74GU4     | <i>Geobacter sulfurreducens</i>     | Acetylglutamate kinase (EC 2.7.2.8) (N-acetyl-L-glutamate 5-phosphotransferase) (NAG kinase) (NAGK) |
| 256 | 484 | 0.02 | A0A0B5BK89 | <i>Geobacter pickeringii</i>        | FAD-binding protein                                                                                 |
| 257 | 484 | 0.02 | A0A0D5N5Y8 | <i>Geobacter sulfurreducens</i>     | Cell division protein FtsA                                                                          |
| 258 | 484 | 0.02 | Q39QV2     | <i>Geobacter metallireducens</i>    | Alpha-glucan phosphorylase                                                                          |
| 259 | 482 | 0.02 | A0A0B5BDP4 | <i>Geobacter pickeringii</i>        | Polya polymerase                                                                                    |
| 260 | 481 | 0.02 | A0A0D5NB12 | <i>Geobacter sulfurreducens</i>     | Aldehyde dehydrogenase                                                                              |
| 261 | 481 | 0.02 |            |                                     |                                                                                                     |
| 262 | 480 | 0.02 | A0A0D5N8X4 | <i>Geobacter sulfurreducens</i>     | Flagellar M-ring protein                                                                            |
| 263 | 480 | 0.02 | B3EA87     | <i>Geobacter lovleyi</i>            | RNA polymerase sigma factor                                                                         |
| 264 | 480 | 0.02 | Q39XL2     | <i>Geobacter metallireducens</i>    | Phosphoenolpyruvate synthase (PEP synthase) (EC 2.7.9.2) (Pyruvate, water dikinase)                 |
| 265 | 480 | 0.02 | Q748I6     | <i>Geobacter sulfurreducens</i>     | Metalloprotease domain protein, M6 family                                                           |
| 266 | 480 | 0.02 | Q74AF7     | <i>Geobacter sulfurreducens</i>     | Methyl viologen-reducing hydrogenase, large subunit                                                 |
| 267 | 478 | 0.02 | Q39Q80     | <i>Geobacter metallireducens</i>    | Sensor histidine kinase, HAMP domain-containing                                                     |
| 268 | 478 | 0.02 | Q39X64     | <i>Geobacter metallireducens</i>    | Cell shape-determining protein MreB                                                                 |
| 269 | 477 | 0.02 | A0A0B5BBC9 | <i>Geobacter pickeringii</i>        | Type I citrate synthase (EC 2.3.3.1)                                                                |
| 270 | 477 | 0.02 | A0A0C1QTJ3 | <i>Geobacter soli</i>               | Hemolysin D                                                                                         |
| 271 | 477 | 0.02 | C6DZ85     | <i>Geobacter sp.</i>                | Conjugal transfer protein                                                                           |
| 272 | 476 | 0.02 | Q39QT3     | <i>Geobacter metallireducens</i>    | Mannose-1-phosphate guanylyltransferase and mannose-6-phosphate isomerase-related protein           |
| 273 | 475 | 0.02 | Q39QK7     | <i>Geobacter metallireducens</i>    | Outer membrane channel OmpJ                                                                         |
| 274 | 475 | 0.02 | Q74B66     | <i>Geobacter sulfurreducens</i>     | TrfA family protein                                                                                 |
| 275 | 475 | 0.02 |            |                                     |                                                                                                     |
| 276 | 474 | 0.02 | F3ZQL8     | <i>Bacteroides coprosuis</i>        | Transposase IS4 family protein                                                                      |
| 277 | 474 | 0.02 | Q39R87     | <i>Geobacter metallireducens</i>    | NADPH oxidoreductase, alpha subunit                                                                 |
| 278 | 473 | 0.02 |            |                                     |                                                                                                     |
| 279 | 472 | 0.02 | A0A0B5B9H5 | <i>Geobacter pickeringii</i>        | Uncharacterized protein                                                                             |
| 280 | 471 | 0.02 | Q39U98     | <i>Geobacter metallireducens</i>    | Phosphoglycerate kinase (EC 2.7.2.3)                                                                |
| 281 | 470 | 0.02 | Q39RM6     | <i>Geobacter metallireducens</i>    | Glycosyltransferase                                                                                 |
| 282 | 469 | 0.02 | A0A0A8WLBO | <i>Geobacter sp.</i>                | Protein TraH                                                                                        |
| 283 | 469 | 0.02 | B9M1Q4     | <i>Geobacter daltonii</i>           | Biotin-dependent acyl-CoA carboxylase, biotin carboxylase subunit                                   |

|     |     |      |            |                                                 |                                                                                                                                                    |
|-----|-----|------|------------|-------------------------------------------------|----------------------------------------------------------------------------------------------------------------------------------------------------|
| 284 | 469 | 0.02 | Q39ZP3     | <i>Geobacter metallireducens</i>                | VWFA superfamily protein                                                                                                                           |
| 285 | 469 | 0.02 | Q39VY3     | <i>Geobacter metallireducens</i>                | Aspartate--tRNA(Asp/Asn) ligase (EC 6.1.1.23) (Aspartyl-tRNA synthetase) (AspRS) (Non-discriminating aspartyl-tRNA synthetase) (ND-AspRS)          |
| 286 | 468 | 0.02 | Q39ZH5     | <i>Geobacter metallireducens</i>                | Cytochrome c/b                                                                                                                                     |
| 287 | 468 | 0.02 | Q74B80     | <i>Geobacter sulfurreducens</i>                 | Uncharacterized protein                                                                                                                            |
| 288 | 466 | 0.02 | A5GCN0     | <i>Geobacter uraniireducens</i>                 | Short chain amide porin                                                                                                                            |
| 289 | 465 | 0.02 | Q39X71     | <i>Geobacter metallireducens</i>                | Uncharacterized protein                                                                                                                            |
| 290 | 463 | 0.02 | AOA1G0LE89 | <i>Geobacteraceae bacterium</i>                 | Aconitate hydratase (Aconitase) (EC 4.2.1.3)                                                                                                       |
| 291 | 462 | 0.02 | Q39X99     | <i>Geobacter metallireducens</i>                | UDP-glucuronate 4-dehydrogenase, decarboxylating                                                                                                   |
| 292 | 461 | 0.02 | AOA0B5BDE7 | <i>Geobacter pickeringii</i>                    | Fis family transcriptional regulator                                                                                                               |
| 293 | 461 | 0.02 | AOA0B5BKE7 | <i>Geobacter pickeringii</i>                    | NADH-quinone oxidoreductase subunit N (EC 1.6.5.11) (NADH dehydrogenase I subunit N) (NDH-1 subunit N)                                             |
| 294 | 459 | 0.02 | A5G8I3     | <i>Geobacter uraniireducens</i>                 | Chaperone protein ClpB                                                                                                                             |
| 295 | 458 | 0.02 | Q39Q79     | <i>Geobacter metallireducens</i>                | Winged-helix transcriptional response regulator                                                                                                    |
| 296 | 458 | 0.02 | Q747G2     | <i>Geobacter sulfurreducens</i>                 | Outer membrane channel OmpJ                                                                                                                        |
| 297 | 457 | 0.02 | Q74BB8     | <i>Geobacter sulfurreducens</i>                 | Metal-dependent phosphohydrolase                                                                                                                   |
| 298 | 456 | 0.02 | AOA1G0E0Z3 | <i>Gamma</i> proteobacteria<br><i>bacterium</i> | Conjugal transfer protein TrbE                                                                                                                     |
| 299 | 456 | 0.02 | AOA1G0LEY2 | <i>Geobacteraceae bacterium</i>                 | Uncharacterized protein                                                                                                                            |
| 300 | 456 | 0.02 | Q74AT0     | <i>Geobacter sulfurreducens</i>                 | Lysine--tRNA ligase (EC 6.1.1.6) (Lysyl-tRNA synthetase) (LysRS)                                                                                   |
| 301 | 456 | 0.02 | Q39WF6     | <i>Geobacter metallireducens</i>                | Ribonuclease Y (RNase Y) (EC 3.1.-.-)                                                                                                              |
| 302 | 455 | 0.02 | AOA0D5N8K2 | <i>Geobacter sulfurreducens</i>                 | RND transporter                                                                                                                                    |
| 303 | 455 | 0.02 | B3EAX6     | <i>Geobacter lovleyi</i>                        | Uncharacterized protein                                                                                                                            |
| 304 | 455 | 0.02 | Q39S10     | <i>Geobacter metallireducens</i>                | Endopeptidase La (EC 3.4.21.53)                                                                                                                    |
| 305 | 454 | 0.02 | AOA0A8WRD3 | <i>Geobacter sp.</i>                            | Putative ABC transporter ATP-binding protein YkpA                                                                                                  |
| 306 | 454 | 0.02 | AOA0B5BG42 | <i>Geobacter pickeringii</i>                    | Vitamin B12-dependent ribonucleotide reductase (EC 1.17.4.1)                                                                                       |
| 307 | 454 | 0.02 | Q748B3     | <i>Geobacter sulfurreducens</i>                 | UDP-N-acetylglucosamine 1-carboxyvinyltransferase (EC 2.5.1.7) (Enoylpyruvate transferase) (UDP-N-acetylglucosamine enolpyruvyl transferase) (EPT) |
| 308 | 454 | 0.02 | Q39X25     | <i>Geobacter metallireducens</i>                | Sensor diguanylate cyclase/phosphodiesterase, GAF domain-containing                                                                                |
| 309 | 454 | 0.02 | Q39X31     | <i>Geobacter metallireducens</i>                | Protein translocase subunit SecA                                                                                                                   |
| 310 | 453 | 0.02 | Q74BT7     | <i>Geobacter sulfurreducens</i>                 | Sensor histidine kinase cyclic nucleotide phosphodiesterase, GAF, GAF and HD-GYP-related domain-containing                                         |
| 311 | 450 | 0.02 | Q39VA6     | <i>Geobacter metallireducens</i>                | Translation initiation factor IF-2                                                                                                                 |
| 312 | 449 | 0.02 | P61185     | <i>Geobacter sulfurreducens</i>                 | Chaperone protein HtpG (Heat shock protein HtpG) (High temperature protein G)                                                                      |
| 313 | 448 | 0.02 | AOA0B5BE21 | <i>Geobacter pickeringii</i>                    | Histidine kinase                                                                                                                                   |
| 314 | 446 | 0.02 | AOA077XLW5 | <i>Sphinx1.76-related DNA</i>                   | Replication protein                                                                                                                                |

|     |     |      |            |                                  |                                                                                                                                                                                          |
|-----|-----|------|------------|----------------------------------|------------------------------------------------------------------------------------------------------------------------------------------------------------------------------------------|
| 315 | 446 | 0.02 | A0A0D5NAV3 | <i>Geobacter sulfurreducens</i>  | Peptidase S41                                                                                                                                                                            |
| 316 | 445 | 0.02 | A0A0B5BJV3 | <i>Geobacter pickeringii</i>     | ABC transporter substrate-binding protein                                                                                                                                                |
| 317 | 445 | 0.02 |            |                                  |                                                                                                                                                                                          |
| 318 | 444 | 0.02 | Q746T2     | <i>Geobacter sulfurreducens</i>  | NADH-quinone oxidoreductase subunit H 2 (EC 1.6.5.11) (NADH dehydrogenase I subunit H 2) (NDH-1 subunit H 2)                                                                             |
| 319 | 444 | 0.02 | Q39YH3     | <i>Geobacter metallireducens</i> | UDP-N-acetylglucosamine 4,6-dehydratase and UDP-2-acetamido-2,6-dideoxy-alpha-D-xylo-4-hexulose 5-epimerase                                                                              |
| 320 | 443 | 0.02 | AOA1T4RGQ7 | <i>Geobacter thiogenes</i>       | NAD+---dinitrogen-reductase ADP-D-ribosyltransferase                                                                                                                                     |
| 321 | 442 | 0.02 | B3EAX2     | <i>Geobacter lovleyi</i>         | Efflux transporter, RND family, MFP subunit                                                                                                                                              |
| 322 | 442 | 0.02 | Q39WZ1     | <i>Geobacter metallireducens</i> | Nitrogen fixation protein NifU                                                                                                                                                           |
| 323 | 441 | 0.02 | P61523     | <i>Geobacter sulfurreducens</i>  | Argininosuccinate synthase (EC 6.3.4.5) (Citrulline--aspartate ligase)                                                                                                                   |
| 324 | 441 | 0.02 | Q39SL1     | <i>Geobacter metallireducens</i> | Lon protease (EC 3.4.21.53) (ATP-dependent protease La)                                                                                                                                  |
| 325 | 441 | 0.02 |            |                                  |                                                                                                                                                                                          |
| 326 | 440 | 0.02 | A0A0B5BBZ4 | <i>Geobacter pickeringii</i>     | DNA polymerase I (EC 2.7.7.7)                                                                                                                                                            |
| 327 | 440 | 0.02 | A0A0D5N949 | <i>Geobacter sulfurreducens</i>  | Response regulator                                                                                                                                                                       |
| 328 | 439 | 0.02 | A0A0A8WQV9 | <i>Geobacter sp.</i>             | Protein TraU                                                                                                                                                                             |
| 329 | 439 | 0.02 | Q39Y18     | <i>Geobacter metallireducens</i> | Transcription termination/antitermination protein NusG                                                                                                                                   |
| 330 | 437 | 0.02 | AOA0C1TS26 | <i>Geobacter soli</i>            | L-aspartate oxidase (EC 1.4.3.16)                                                                                                                                                        |
| 331 | 437 | 0.02 | AOA0T5YH86 | <i>Acinetobacter baumannii</i>   | Mobilization protein A                                                                                                                                                                   |
| 332 | 437 | 0.02 | Q748X2     | <i>Geobacter sulfurreducens</i>  | 3-isopropylmalate dehydrogenase (EC 1.1.1.85) (3-IPM-DH) (Beta-IPM dehydrogenase) (IMDH)                                                                                                 |
| 333 | 437 | 0.02 | Q39Q96     | <i>Geobacter metallireducens</i> | Type II secretion system inner membrane protein GspF                                                                                                                                     |
| 334 | 436 | 0.02 | Q39Z54     | <i>Geobacter metallireducens</i> | Membrane protein, putative                                                                                                                                                               |
| 335 | 435 | 0.02 | A0A0B5BCB2 | <i>Geobacter pickeringii</i>     | Nitrogen fixation protein NifE                                                                                                                                                           |
| 336 | 433 | 0.01 | A0A0B5B7K6 | <i>Geobacter pickeringii</i>     | Cytochrome C biogenesis protein ResC                                                                                                                                                     |
| 337 | 433 | 0.01 | Q39QM2     | <i>Geobacter metallireducens</i> | K(+)-insensitive pyrophosphate-energized proton pump (EC 3.6.1.1) (Membrane-bound proton-translocating pyrophosphatase) (Pyrophosphate-energized inorganic pyrophosphatase) (H(+)-PPase) |
| 338 | 431 | 0.01 | A0A0B5BC52 | <i>Geobacter pickeringii</i>     | General secretion pathway protein GspD                                                                                                                                                   |
| 339 | 431 | 0.01 | A0A0D5N4Y8 | <i>Geobacter sulfurreducens</i>  | Pilus assembly protein PilB                                                                                                                                                              |
| 340 | 431 | 0.01 | Q39RF8     | <i>Geobacter metallireducens</i> | Carbon starvation protein CstA                                                                                                                                                           |
| 341 | 430 | 0.01 | Q39QZ9     | <i>Geobacter metallireducens</i> | Flagellar motor switch protein FliG                                                                                                                                                      |
| 342 | 430 | 0.01 | Q39UW3     | <i>Geobacter metallireducens</i> | Succinyl:acetate coenzyme A transferase                                                                                                                                                  |
| 343 | 430 | 0.01 | Q39W43     | <i>Geobacter metallireducens</i> | Oligoendopeptidase F                                                                                                                                                                     |
| 344 | 430 | 0.01 | Q747G4     | <i>Geobacter sulfurreducens</i>  | (R)-methylmalonyl-CoA mutase, isobutyryl-CoA mutase-like catalytic subunit                                                                                                               |
| 345 | 428 | 0.01 | Q748Y3     | <i>Geobacter sulfurreducens</i>  | 50S ribosomal protein L1                                                                                                                                                                 |
| 346 | 427 | 0.01 | A0A0B5B6P6 | <i>Geobacter pickeringii</i>     | Histidine kinase                                                                                                                                                                         |

|     |     |      |            |                                     |                                                                                                                                                                                                                              |
|-----|-----|------|------------|-------------------------------------|------------------------------------------------------------------------------------------------------------------------------------------------------------------------------------------------------------------------------|
| 347 | 426 | 0.01 | Q39QU4     | <i>Geobacter metallireducens</i>    | ATP-dependent DNA helicase DinG                                                                                                                                                                                              |
| 348 | 426 | 0.01 | Q39XW9     | <i>Geobacter metallireducens</i>    | Nitrogenase protein alpha chain (EC 1.18.6.1)                                                                                                                                                                                |
| 349 | 424 | 0.01 | A0A0B5BGV8 | <i>Geobacter pickeringii</i>        | Zinc protease                                                                                                                                                                                                                |
| 350 | 424 | 0.01 | A5GDY5     | <i>Geobacter uraniiireducens</i>    | DNA gyrase subunit A (EC 5.99.1.3)                                                                                                                                                                                           |
| 351 | 424 | 0.01 | Q39VR6     | <i>Geobacter metallireducens</i>    | DNA mismatch repair protein MutS                                                                                                                                                                                             |
| 352 | 424 | 0.01 | Q74D56     | <i>Geobacter sulfurreducens</i>     | Aspartate--tRNA(Asp/Asn) ligase (EC 6.1.1.23) (Aspartyl-tRNA synthetase) (AspRS) (Non-discriminating aspartyl-tRNA synthetase) (ND-AspRS)                                                                                    |
| 353 | 423 | 0.01 | E1QK40     | <i>Desulfarculus baarsii</i>        | DNA-cytosine methyltransferase                                                                                                                                                                                               |
| 354 | 422 | 0.01 | A0A0D5N3H2 | <i>Geobacter sulfurreducens</i>     | DEAD/DEAH box helicase                                                                                                                                                                                                       |
| 355 | 422 | 0.01 | A0A1F9PXI1 | <i>Desulfuromonadales bacterium</i> | Cytosine-specific methyltransferase (EC 2.1.1.37)                                                                                                                                                                            |
| 356 | 422 | 0.01 | Q74F32     | <i>Geobacter sulfurreducens</i>     | Periplasmically oriented, membrane-bound formate dehydrogenase, major subunit, selenocysteine-containing                                                                                                                     |
| 357 | 421 | 0.01 | Q39PS5     | <i>Geobacter metallireducens</i>    | Quinolate synthase A (EC 2.5.1.72)                                                                                                                                                                                           |
| 358 | 421 | 0.01 | Q39QK5     | <i>Geobacter metallireducens</i>    | Uncharacterized protein                                                                                                                                                                                                      |
| 359 | 421 | 0.01 | Q8VQM8     | <i>Prevotella intermedia</i>        | Mobilization protein                                                                                                                                                                                                         |
| 360 | 420 | 0.01 | K9DJ35     | <i>Veillonella seminalis</i>        | DNA topoisomerase III                                                                                                                                                                                                        |
| 361 | 420 | 0.01 | Q39Q46     | <i>Geobacter metallireducens</i>    | ABC transporter, ATP-binding/membrane protein                                                                                                                                                                                |
| 362 | 420 | 0.01 | Q39ZE2     | <i>Geobacter metallireducens</i>    | Polyphosphate kinase (EC 2.7.4.1) (ATP-polyphosphate phosphotransferase) (Polyphosphoric acid kinase)                                                                                                                        |
| 363 | 418 | 0.01 | B9M5J7     | <i>Geobacter daltonii</i>           | CRISPR-associated protein Csd2                                                                                                                                                                                               |
| 364 | 418 | 0.01 | Q39PY9     | <i>Geobacter metallireducens</i>    | Histidine kinase (EC 2.7.13.3)                                                                                                                                                                                               |
| 365 | 418 | 0.01 | Q39US2     | <i>Geobacter metallireducens</i>    | Carbamoyl-phosphate synthase small chain (EC 6.3.5.5) (Carbamoyl-phosphate synthetase glutamine chain)                                                                                                                       |
| 366 | 418 | 0.01 | Q39X54     | <i>Geobacter metallireducens</i>    | Peptidoglycan transpeptidase                                                                                                                                                                                                 |
| 367 | 418 | 0.01 | Q39YS7     | <i>Geobacter metallireducens</i>    | Peptidoglycan transglycosylase and transpeptidase MrcA                                                                                                                                                                       |
| 368 | 416 | 0.01 | A5GE75     | <i>Geobacter metallireducens</i>    | Heavy metal translocating P-type ATPase                                                                                                                                                                                      |
| 369 | 416 | 0.01 | Q39RQ8     | <i>Geobacter metallireducens</i>    | Ribose-phosphate pyrophosphokinase (RPPK) (EC 2.7.6.1) (5-phospho-D-ribosyl alpha-1-diphosphate) (Phosphoribosyl diphosphate synthase) (Phosphoribosyl pyrophosphate synthase) (P-Rib-PP synthase) (PRPP synthase) (PRPPase) |
| 370 | 415 | 0.01 | A0A1T4YKH5 | <i>Prostheco bacter debontii</i>    | Antirestriction protein ArdC                                                                                                                                                                                                 |
| 371 | 415 | 0.01 | Q39ZP1     | <i>Geobacter metallireducens</i>    | ATPase, AAA family                                                                                                                                                                                                           |
| 372 | 415 | 0.01 | Q74GH2     | <i>Geobacter sulfurreducens</i>     | Cytochrome c, and cytochrome b                                                                                                                                                                                               |
| 373 | 414 | 0.01 | C6DZ84     | <i>Geobacter sp.</i>                | p-type conjugative transfer protein TrbG                                                                                                                                                                                     |
| 374 | 414 | 0.01 | Q39X42     | <i>Geobacter metallireducens</i>    | Alpha-1,4 glucan phosphorylase (EC 2.4.1.1)                                                                                                                                                                                  |
| 375 | 414 | 0.01 | Q39XX9     | <i>Geobacter metallireducens</i>    | DNA-directed RNA polymerase subunit alpha (RNAP subunit alpha) (EC 2.7.7.6) (RNA polymerase subunit alpha) (Transcriptase subunit alpha)                                                                                     |



|     |     |      |            |                                  |                                                                                                     |
|-----|-----|------|------------|----------------------------------|-----------------------------------------------------------------------------------------------------|
| 376 | 413 | 0.01 | A0A0D5N8X6 | <i>Geobacter sulfurreducens</i>  | Chemotaxis protein                                                                                  |
| 377 | 413 | 0.01 | Q39RS7     | <i>Geobacter metallireducens</i> | DUF748 repeat protein                                                                               |
| 378 | 411 | 0.01 | A0A0B5BH19 | <i>Geobacter pickeringii</i>     | Uncharacterized protein                                                                             |
| 379 | 411 | 0.01 | Q39QS0     | <i>Geobacter metallireducens</i> | Radical SAM domain iron-sulfur cluster-binding oxidoreductase, DUF2344-containing                   |
| 380 | 411 | 0.01 | Q39RC6     | <i>Geobacter metallireducens</i> | DNA polymerase I (EC 2.7.7.7)                                                                       |
| 381 | 411 | 0.01 | Q39RL8     | <i>Geobacter metallireducens</i> | Undecaprenyl-diphospho-oligosaccharide flippase                                                     |
| 382 | 410 | 0.01 | A0A0D5N732 | <i>Geobacter sulfurreducens</i>  | Transcription-repair-coupling factor (TRCF) (EC 3.6.4.-)                                            |
| 383 | 410 | 0.01 | Q39ZQ3     | <i>Geobacter metallireducens</i> | ATPase, AAA_5 family                                                                                |
| 384 | 409 | 0.01 | C6DZ91     | <i>Geobacter sp.</i>             | p-type conjugative transfer ATPase TrbB                                                             |
| 385 | 408 | 0.01 | Q748A7     | <i>Geobacter sulfurreducens</i>  | Transcription termination factor Rho (EC 3.6.4.-) (ATP-dependent helicase Rho)                      |
| 386 | 407 | 0.01 | A0A0B5BJ17 | <i>Geobacter pickeringii</i>     | UvrABC system protein C (Protein UvrC) (Excinuclease ABC subunit C)                                 |
| 387 | 407 | 0.01 | Q39UC7     | <i>Geobacter metallireducens</i> | Response receiver sensor histidine kinase response regulator, PAS domain-containing                 |
| 388 | 405 | 0.01 | A0A0B5B8W1 | <i>Geobacter pickeringii</i>     | ATP-dependent zinc metalloprotease FtsH (EC 3.4.24.-)                                               |
| 389 | 405 | 0.01 | A0A0B5B9Q9 | <i>Geobacter pickeringii</i>     | Glycosyl transferase                                                                                |
| 390 | 404 | 0.01 | A0A0D5N645 | <i>Geobacter sulfurreducens</i>  | Penicillin-binding protein                                                                          |
| 391 | 404 | 0.01 | A0A1Q8EYA1 | <i>Aeromonas veronii</i>         | Methyltransferase (EC 2.1.1.-)                                                                      |
| 392 | 404 | 0.01 | B9M4C2     | <i>Geobacter daltonii</i>        | Squalene cyclase                                                                                    |
| 393 | 404 | 0.01 | Q39T27     | <i>Geobacter metallireducens</i> | Enolase (EC 4.2.1.11) (2-phospho-D-glycerate hydro-lyase) (2-phosphoglycerate dehydratase)          |
| 394 | 404 | 0.01 | Q39Q47     | <i>Geobacter metallireducens</i> | Selenocysteine-specific translation elongation factor                                               |
| 395 | 403 | 0.01 | A0A0B5BFA5 | <i>Geobacter pickeringii</i>     | Formate dehydrogenase                                                                               |
| 396 | 403 | 0.01 | A0A0B5BK21 | <i>Geobacter pickeringii</i>     | Inner membrane cytochrome H                                                                         |
| 397 | 403 | 0.01 | P61946     | <i>Geobacter sulfurreducens</i>  | S-adenosylmethionine synthase (AdoMet synthase) (EC 2.5.1.6) (MAT) (Methionine adenosyltransferase) |
| 398 | 401 | 0.01 | A0A0B5BFC0 | <i>Geobacter pickeringii</i>     | Ni/Fe hydrogenase                                                                                   |
| 399 | 401 | 0.01 | A0A0B5BGX4 | <i>Geobacter pickeringii</i>     | Stage II sporulation protein E                                                                      |
| 400 | 401 | 0.01 | Q747K3     | <i>Geobacter sulfurreducens</i>  | UvrABC system protein B (Protein UvrB) (Excinuclease ABC subunit B)                                 |
| 401 | 400 | 0.01 | Q74H59     | <i>Geobacter sulfurreducens</i>  | Chaperone protein DnaK (HSP70) (Heat shock 70 kDa protein) (Heat shock protein 70)                  |
| 402 | 400 | 0.01 | Q39WA8     | <i>Geobacter metallireducens</i> | Sodium/solute symporter, GAF and PP2C family protein serine/threonine phosphatase domain protein    |
| 403 | 400 | 0.01 | Q39YM5     | <i>Geobacter metallireducens</i> | Peptidoglycan transglycosylase and transpeptidase FtsI                                              |
| 404 | 399 | 0.01 | A0A0B5BK07 | <i>Geobacter pickeringii</i>     | Histidine kinase                                                                                    |
| 405 | 399 | 0.01 | B0L930     | <i>uncultured Geobacter sp.</i>  | Tuf (Fragment)                                                                                      |
| 406 | 398 | 0.01 | Q39UL6     | <i>Geobacter metallireducens</i> | Sodium/phosphate symporter, putative                                                                |
| 407 | 397 | 0.01 | A0A0D5N435 | <i>Geobacter sulfurreducens</i>  | Multidrug transporter                                                                               |
| 408 | 397 | 0.01 | Q74EP9     | <i>Geobacter sulfurreducens</i>  | DNA-binding ATPase Uup                                                                              |
| 409 | 397 | 0.01 |            |                                  |                                                                                                     |

|     |     |      |            |                                    |                                                                                                                                                                                                                      |
|-----|-----|------|------------|------------------------------------|----------------------------------------------------------------------------------------------------------------------------------------------------------------------------------------------------------------------|
| 410 | 396 | 0.01 | Q39YP6     | <i>Geobacter metallireducens</i>   | Histidinol-phosphate aminotransferase (EC 2.6.1.9) (Imidazole acetol-phosphate transaminase)                                                                                                                         |
| 411 | 395 | 0.01 | A0A0B5B6N9 | <i>Geobacter pickeringii</i>       | Alanine--tRNA ligase (EC 6.1.1.7) (Alanyl-tRNA synthetase) (AlaRS)                                                                                                                                                   |
| 412 | 395 | 0.01 | Q39TA6     | <i>Geobacter metallireducens</i>   | Inosine-5'-monophosphate dehydrogenase (IMP dehydrogenase) (IMPD) (IMPDH) (EC 1.1.1.205)                                                                                                                             |
| 413 | 394 | 0.01 | A0A0F2N896 | <i>Desulfobulbaceae bacterium</i>  | Restriction endonuclease subunit R                                                                                                                                                                                   |
| 414 | 394 | 0.01 | Q39U52     | <i>Geobacter metallireducens</i>   | Sensor histidine kinase, GAF domain-containing                                                                                                                                                                       |
| 415 | 394 | 0.01 |            |                                    |                                                                                                                                                                                                                      |
| 416 | 393 | 0.01 | A0A0B5BCR8 | <i>Geobacter pickeringii</i>       | Alpha-1,4 glucan phosphorylase (EC 2.4.1.1)                                                                                                                                                                          |
| 417 | 392 | 0.01 | A0A0B5BGU8 | <i>Geobacter pickeringii</i>       | Chemotaxis protein                                                                                                                                                                                                   |
| 418 | 392 | 0.01 | Q39ZF6     | <i>Geobacter metallireducens</i>   | Carbamoyltransferase HypF (EC 2.1.3.-)                                                                                                                                                                               |
| 419 | 392 | 0.01 | Q39Z77     | <i>Geobacter metallireducens</i>   | Alanine--tRNA ligase (EC 6.1.1.7) (Alanyl-tRNA synthetase) (AlaRS)                                                                                                                                                   |
| 420 | 392 | 0.01 | Q39QN3     | <i>Geobacter metallireducens</i>   | UvrABC system protein C (Protein UvrC) (Excinuclease ABC subunit C)                                                                                                                                                  |
| 421 | 391 | 0.01 | A0A0D5N5H4 | <i>Geobacter sulfurreducens</i>    | Cell division protein FtsK                                                                                                                                                                                           |
| 422 | 391 | 0.01 | Q74H61     | <i>Geobacter sulfurreducens</i>    | Heat-inducible transcription repressor HrcA                                                                                                                                                                          |
| 423 | 391 | 0.01 | Q39W55     | <i>Geobacter metallireducens</i>   | RNA polymerase sigma-54 factor                                                                                                                                                                                       |
| 424 | 389 | 0.01 | Q39QK1     | <i>Geobacter metallireducens</i>   | Adenylosuccinate synthetase (AMPSase) (AdSS) (EC 6.3.4.4) (IMP--aspartate ligase)                                                                                                                                    |
| 425 | 389 | 0.01 | Q39QD6     | <i>Geobacter metallireducens</i>   | Amino acid aminotransferase, putative                                                                                                                                                                                |
| 426 | 388 | 0.01 | A0A0B5B672 | <i>Geobacter pickeringii</i>       | FeS-binding protein                                                                                                                                                                                                  |
| 427 | 388 | 0.01 | A0A1T4RHG8 | <i>Geobacter thiogenes</i>         | Iron complex outermembrane receptor protein                                                                                                                                                                          |
| 428 | 388 | 0.01 | A5GC25     | <i>Geobacter uraniireducens</i>    | Propionyl-CoA carboxylase (EC 6.4.1.3)                                                                                                                                                                               |
| 429 | 388 | 0.01 | B3EAB9     | <i>Geobacter lovleyi</i>           | 4Fe-4S ferredoxin, iron-sulfur binding domain protein                                                                                                                                                                |
| 430 | 387 | 0.01 | A0A086P5I1 | <i>Sphingobium herbicidovorans</i> | Conjugal transfer protein TrbE                                                                                                                                                                                       |
| 431 | 387 | 0.01 | P61343     | <i>Geobacter sulfurreducens</i>    | Aspartyl/glutamyl-tRNA(Asn/Gln) amidotransferase subunit B (Asp/Glu-ADT subunit B) (EC 6.3.5.-)                                                                                                                      |
| 432 | 387 | 0.01 | Q74E27     | <i>Geobacter sulfurreducens</i>    | Ribonuclease Y (RNase Y) (EC 3.1.-.-)                                                                                                                                                                                |
| 433 | 385 | 0.01 | Q39VU9     | <i>Geobacter metallireducens</i>   | Polyprenyl-phospho-glycoside--protein O-glycosyltransferase DUF2723 membrane protein, putative                                                                                                                       |
| 434 | 384 | 0.01 | A0A0B5BJ50 | <i>Geobacter pickeringii</i>       | Chemotaxis protein CheA                                                                                                                                                                                              |
| 435 | 384 | 0.01 | B3EA98     | <i>Geobacter lovleyi</i>           | Transcriptional regulator, XRE family                                                                                                                                                                                |
| 436 | 384 | 0.01 | Q39QD7     | <i>Geobacter metallireducens</i>   | Methyl-accepting chemotaxis sensory transducer                                                                                                                                                                       |
| 437 | 384 | 0.01 | Q74B89     | <i>Geobacter sulfurreducens</i>    | Uncharacterized protein                                                                                                                                                                                              |
| 438 | 383 | 0.01 | A0A0D5N4L7 | <i>Geobacter sulfurreducens</i>    | Outer membrane protein assembly factor BamA                                                                                                                                                                          |
| 439 | 383 | 0.01 | A1AM25     | <i>Pelobacter propionicus</i>      | Squalene-hopene cyclase                                                                                                                                                                                              |
| 440 | 383 | 0.01 | Q39WA5     | <i>Geobacter metallireducens</i>   | TPR domain protein                                                                                                                                                                                                   |
| 441 | 382 | 0.01 | A0A0B5BIU4 | <i>Geobacter pickeringii</i>       | Probable glycine dehydrogenase (decarboxylating) subunit 1 (EC 1.4.4.2) (Glycine cleavage system P-protein subunit 1) (Glycine decarboxylase subunit 1) (Glycine dehydrogenase (aminomethyl-transferring) subunit 1) |

|     |     |      |            |                                   |                                                                                                                                                                                                                                                                                                                          |
|-----|-----|------|------------|-----------------------------------|--------------------------------------------------------------------------------------------------------------------------------------------------------------------------------------------------------------------------------------------------------------------------------------------------------------------------|
| 442 | 382 | 0.01 | A0A0B5BIW8 | <i>Geobacter pickeringii</i>      | Aminotransferase                                                                                                                                                                                                                                                                                                         |
| 443 | 382 | 0.01 | A0A1T4LT91 | <i>Geobacter thiogenes</i>        | Putative transposase                                                                                                                                                                                                                                                                                                     |
| 444 | 382 | 0.01 | Q39S32     | <i>Geobacter metallireducens</i>  | DNA helicase (EC 3.6.4.12)                                                                                                                                                                                                                                                                                               |
| 445 | 382 | 0.01 | Q39SS9     | <i>Geobacter metallireducens</i>  | Cytochrome c                                                                                                                                                                                                                                                                                                             |
| 446 | 381 | 0.01 | A0A0B5BIH3 | <i>Geobacter pickeringii</i>      | Uncharacterized protein                                                                                                                                                                                                                                                                                                  |
| 447 | 381 | 0.01 | A1ANK6     | <i>Pelobacter propionicus</i>     | Peptidase C1A, papain                                                                                                                                                                                                                                                                                                    |
| 448 | 380 | 0.01 | A0A1T4RTR1 | <i>Geobacter thiogenes</i>        | Iron complex outermembrane receptor protein                                                                                                                                                                                                                                                                              |
| 449 | 380 | 0.01 | Q39RM7     | <i>Geobacter metallireducens</i>  | Glycosyltransferase                                                                                                                                                                                                                                                                                                      |
| 450 | 380 | 0.01 | Q39T88     | <i>Geobacter metallireducens</i>  | Sensor histidine kinase CheA associated with MCPs of class 40H                                                                                                                                                                                                                                                           |
| 451 | 379 | 0.01 | A0A0B5BDG8 | <i>Geobacter pickeringii</i>      | ABC transporter ATP-binding protein                                                                                                                                                                                                                                                                                      |
| 452 | 378 | 0.01 | A0A0B5B7G6 | <i>Geobacter pickeringii</i>      | Cytochrome C                                                                                                                                                                                                                                                                                                             |
| 453 | 378 | 0.01 | A0A0F2NAV5 | <i>Desulfobulbaceae bacterium</i> | Helicase                                                                                                                                                                                                                                                                                                                 |
| 454 | 378 | 0.01 | B5E8R5     | <i>Geobacter bemidjensis</i>      | Glutamine synthetase (EC 6.3.1.2)                                                                                                                                                                                                                                                                                        |
| 455 | 377 | 0.01 | A0A0B5BGY7 | <i>Geobacter pickeringii</i>      | Phosphoglucomutase                                                                                                                                                                                                                                                                                                       |
| 456 | 377 | 0.01 | Q39UI6     | <i>Geobacter metallireducens</i>  | Type II secretion system secretin lipoprotein PulQ                                                                                                                                                                                                                                                                       |
| 457 | 377 | 0.01 | Q74GF2     | <i>Geobacter sulfurreducens</i>   | Metal-dependent phosphohydrolase, HDOD domain-containing                                                                                                                                                                                                                                                                 |
| 458 | 376 | 0.01 | A0A0B5B942 | <i>Geobacter pickeringii</i>      | Bifunctional uridylyltransferase/uridylyl-removing enzyme (UTase/UR) (Bifunctional [protein-PII] modification enzyme) (Bifunctional nitrogen sensor protein) [Includes: [Protein-PII]-UMP uridylyl-removing enzyme (UR) (EC 3.1.4.-); [Protein-PII] uridylyltransferase (PII uridylyltransferase) (UTase) (EC 2.7.7.59)] |
| 459 | 376 | 0.01 | A0A0B5BBH7 | <i>Geobacter pickeringii</i>      | Endopeptidase La (EC 3.4.21.53)                                                                                                                                                                                                                                                                                          |
| 460 | 376 | 0.01 | A0A0B5BGI9 | <i>Geobacter pickeringii</i>      | Lon protease (EC 3.4.21.53) (ATP-dependent protease La)                                                                                                                                                                                                                                                                  |
| 461 | 376 | 0.01 | Q74A52     | <i>Geobacter sulfurreducens</i>   | Carboxynorspermidine/carboxyspermidine dehydrogenase                                                                                                                                                                                                                                                                     |
| 462 | 376 | 0.01 | Q74AR7     | <i>Geobacter sulfurreducens</i>   | Membrane-associated metal-dependent phosphohydrolase, HDc domain-containing                                                                                                                                                                                                                                              |
| 463 | 376 | 0.01 | P60401     | <i>Geobacter sulfurreducens</i>   | 50S ribosomal protein L2                                                                                                                                                                                                                                                                                                 |
| 464 | 375 | 0.01 | A0A0B5BJG9 | <i>Geobacter pickeringii</i>      | GntR family transcriptional regulator                                                                                                                                                                                                                                                                                    |
| 465 | 375 | 0.01 | B3EA94     | <i>Geobacter lovleyi</i>          | Uncharacterized protein                                                                                                                                                                                                                                                                                                  |
| 466 | 375 | 0.01 | Q74BF0     | <i>Geobacter sulfurreducens</i>   | Phosphoribosylaminoimidazole-succinocarboxamide synthase (EC 6.3.2.6) (SAICAR synthetase)                                                                                                                                                                                                                                |
| 467 | 375 | 0.01 | Q74D04     | <i>Geobacter sulfurreducens</i>   | Threonine--tRNA ligase (EC 6.1.1.3) (Threonyl-tRNA synthetase) (ThrRS)                                                                                                                                                                                                                                                   |
| 468 | 374 | 0.01 | A0A0D5NDV9 | <i>Geobacter sulfurreducens</i>   | HD family phosphohydrolase                                                                                                                                                                                                                                                                                               |
| 469 | 374 | 0.01 | A0A0M3GK70 | <i>Rhizobium phaseoli</i>         | Uncharacterized protein                                                                                                                                                                                                                                                                                                  |
| 470 | 374 | 0.01 | N8YFI4     | <i>Acinetobacter gernerii</i>     | Uncharacterized protein                                                                                                                                                                                                                                                                                                  |
| 471 | 373 | 0.01 | A0A0B5B8X9 | <i>Geobacter pickeringii</i>      | Phosphoenolpyruvate-protein phosphotransferase (EC 2.7.3.9) (Phosphotransferase system, enzyme I)                                                                                                                                                                                                                        |
| 472 | 373 | 0.01 | A0A0B5BDW0 | <i>Geobacter pickeringii</i>      | Leucine--tRNA ligase (EC 6.1.1.4) (Leucyl-tRNA synthetase) (LeuRS)                                                                                                                                                                                                                                                       |

|     |     |      |            |                                  |                                                                                                                                                                                     |
|-----|-----|------|------------|----------------------------------|-------------------------------------------------------------------------------------------------------------------------------------------------------------------------------------|
| 473 | 373 | 0.01 | Q39QC0     | <i>Geobacter metallireducens</i> | NADH-quinone oxidoreductase subunit N (EC 1.6.5.11) (NADH dehydrogenase I subunit N) (NDH-1 subunit N)                                                                              |
| 474 | 372 | 0.01 | Q39Z96     | <i>Geobacter metallireducens</i> | S1 RNA-binding domain-containing transcriptional accessory protein                                                                                                                  |
| 475 | 371 | 0.01 | A0A0D5N8I2 | <i>Geobacter sulfurreducens</i>  | Histidine kinase                                                                                                                                                                    |
| 476 | 371 | 0.01 | A0A1G0MT57 | <i>Geobacteraceae bacterium</i>  | Uncharacterized protein                                                                                                                                                             |
| 477 | 370 | 0.01 | A0A0B5BFH3 | <i>Geobacter pickeringii</i>     | Polyribonucleotide nucleotidyltransferase (EC 2.7.7.8) (Polynucleotide phosphorylase) (PNPase)                                                                                      |
| 478 | 370 | 0.01 | A0A0C1TL33 | <i>Geobacter soli</i>            | Uncharacterized protein                                                                                                                                                             |
| 479 | 370 | 0.01 | Q39WW8     | <i>Geobacter metallireducens</i> | Periplasmic serine endoprotease DegP-like (EC 3.4.21.107)                                                                                                                           |
| 480 | 369 | 0.01 | Q39RK5     | <i>Geobacter metallireducens</i> | ResB-like family cytochrome c                                                                                                                                                       |
| 481 | 369 | 0.01 | Q74EQ2     | <i>Geobacter sulfurreducens</i>  | Aldehyde:ferredoxin oxidoreductase, tungsten-containing                                                                                                                             |
| 482 | 368 | 0.01 | A0A0A8WQH6 | <i>Geobacter sp. OR-1</i>        | Uncharacterized protein                                                                                                                                                             |
| 483 | 368 | 0.01 | A0A0B5BI14 | <i>Geobacter pickeringii</i>     | GTPase Der (GTP-binding protein EngA)                                                                                                                                               |
| 484 | 368 | 0.01 | Q39QI4     | <i>Geobacter metallireducens</i> | DNA repair protein RadA                                                                                                                                                             |
| 485 | 368 | 0.01 | Q39QZ8     | <i>Geobacter metallireducens</i> | Flagellar M-ring protein                                                                                                                                                            |
| 486 | 367 | 0.01 | A0A077XNB6 | <i>Sphinx1.76-related DNA</i>    | Replication protein                                                                                                                                                                 |
| 487 | 367 | 0.01 | A0A0B5B9N3 | <i>Geobacter pickeringii</i>     | 3-oxoacyl-[acyl-carrier-protein] synthase 2 (EC 2.3.1.179)                                                                                                                          |
| 488 | 367 | 0.01 | Q39W82     | <i>Geobacter metallireducens</i> | 1-deoxy-D-xylulose 5-phosphate reductoisomerase (DXP reductoisomerase) (EC 1.1.1.267) (1-deoxyxylulose-5-phosphate reductoisomerase) (2-C-methyl-D-erythritol 4-phosphate synthase) |
| 489 | 367 | 0.01 | Q39RG8     | <i>Geobacter metallireducens</i> | Methyl-accepting chemotaxis sensory transducer, class 40+24H                                                                                                                        |
| 490 | 366 | 0.01 | E1QK33     | <i>Desulfarculus baarsii</i>     | ATP-binding region ATPase domain protein                                                                                                                                            |
| 491 | 365 | 0.01 | A0A0B5BBF5 | <i>Geobacter pickeringii</i>     | Twin-arginine translocation pathway signal protein                                                                                                                                  |
| 492 | 365 | 0.01 | Q30VS6     | <i>Desulfovibrio alaskensis</i>  | Site-specific DNA-methyltransferase (Adenine-specific) (EC 2.1.1.72)                                                                                                                |
| 493 | 364 | 0.01 | A0A1G1GH24 | <i>Nitrospirae bacterium</i>     | Uncharacterized protein                                                                                                                                                             |
| 494 | 364 | 0.01 | Q39UL3     | <i>Geobacter metallireducens</i> | Peptidoglycan-binding protein, OmpA family                                                                                                                                          |
| 495 | 364 | 0.01 | Q39V80     | <i>Geobacter metallireducens</i> | Acyl-(Acyl carrier protein) ligase, acyl carrier, [acyl-]glycerolphosphate acyltransferase fusion protein                                                                           |
| 496 | 364 | 0.01 | Q39ZS2     | <i>Geobacter metallireducens</i> | DNA polymerase III subunit beta (EC 2.7.7.7)                                                                                                                                        |
| 497 | 364 | 0.01 | Q747L0     | <i>Geobacter sulfurreducens</i>  | Glycoside hydrolase, family 57                                                                                                                                                      |
| 498 | 364 | 0.01 | Q74GB8     | <i>Geobacter sulfurreducens</i>  | Type II secretion system ATPase GspE                                                                                                                                                |
| 499 | 364 | 0.01 | Q74H55     | <i>Geobacter sulfurreducens</i>  | Serine--tRNA ligase (EC 6.1.1.11) (Seryl-tRNA synthetase) (SerRS) (Seryl-tRNA(Ser/Sec) synthetase)                                                                                  |
| 500 | 363 | 0.01 | A0A0B5B7W4 | <i>Geobacter pickeringii</i>     | Transporter                                                                                                                                                                         |

**Table S6b.** Functional overview of M4C community (top 500 rank only).

| Rank | Count | Abundance | ID         | Organism                         | Protein Names                                                                                                                            |
|------|-------|-----------|------------|----------------------------------|------------------------------------------------------------------------------------------------------------------------------------------|
| 1    | 2713  | 0.13      |            |                                  |                                                                                                                                          |
| 2    | 2691  | 0.12      | Q90ZJ2     | <i>Oryzias latipes</i>           | TAP2 protein (Fragment)                                                                                                                  |
| 3    | 2512  | 0.12      |            |                                  |                                                                                                                                          |
| 4    | 2059  | 0.10      |            |                                  |                                                                                                                                          |
| 5    | 1704  | 0.08      | A0A031IBP7 | <i>Micrococcus luteus</i>        | Uncharacterized protein                                                                                                                  |
| 6    | 1366  | 0.06      | Q37953     | <i>Phage M13mp18</i>             | LacZ protein (Fragment)                                                                                                                  |
| 7    | 1281  | 0.06      |            |                                  |                                                                                                                                          |
| 8    | 1129  | 0.05      | N8ZVC9     | <i>Acinetobacter gernerii</i>    | Uncharacterized protein                                                                                                                  |
| 9    | 979   | 0.05      |            |                                  |                                                                                                                                          |
| 10   | 914   | 0.04      | N8ZNX3     | <i>Acinetobacter gernerii</i>    | Uncharacterized protein                                                                                                                  |
| 11   | 812   | 0.04      |            |                                  |                                                                                                                                          |
| 12   | 755   | 0.04      |            |                                  |                                                                                                                                          |
| 13   | 748   | 0.03      | A0A0R3QEE4 | <i>Brugia timori</i>             | Uncharacterized protein                                                                                                                  |
| 14   | 696   | 0.03      | Q8VQM8     | <i>Prevotella intermedia</i>     | Mobilization protein                                                                                                                     |
| 15   | 692   | 0.03      | A0A0D5N8Q4 | <i>Geobacter sulfurreducens</i>  | Transposase                                                                                                                              |
| 16   | 676   | 0.03      |            |                                  |                                                                                                                                          |
| 17   | 668   | 0.03      |            |                                  |                                                                                                                                          |
| 18   | 654   | 0.03      |            |                                  |                                                                                                                                          |
| 19   | 640   | 0.03      |            |                                  |                                                                                                                                          |
| 20   | 621   | 0.03      | A0A0D5N7W1 | <i>Geobacter sulfurreducens</i>  | ATPase                                                                                                                                   |
| 21   | 612   | 0.03      | Q39RM9     | <i>Geobacter metallireducens</i> | Membrane protein, putative                                                                                                               |
| 22   | 580   | 0.03      | Q39Y12     | <i>Geobacter metallireducens</i> | DNA-directed RNA polymerase subunit beta' (RNAP subunit beta') (EC 2.7.7.6) (RNA polymerase subunit beta') (Transcriptase subunit beta') |
| 23   | 572   | 0.03      | Q748Y6     | <i>Geobacter sulfurreducens</i>  | DNA-directed RNA polymerase subunit beta (RNAP subunit beta) (EC 2.7.7.6) (RNA polymerase subunit beta) (Transcriptase subunit beta)     |
| 24   | 572   | 0.03      |            |                                  |                                                                                                                                          |
| 25   | 570   | 0.03      | A0A077XLW5 | <i>Sphinx1.76-related DNA</i>    | Replication protein                                                                                                                      |
| 26   | 532   | 0.02      | A5GAB4     | <i>Geobacter uraniireducens</i>  | Putative GAF sensor protein                                                                                                              |
| 27   | 527   | 0.02      | Q74AK2     | <i>Geobacter sulfurreducens</i>  | Sodium/solute symporter family protein                                                                                                   |
| 28   | 525   | 0.02      |            |                                  |                                                                                                                                          |
| 29   | 513   | 0.02      | A0A0A8WNU3 | <i>Geobacter sp. OR-1</i>        | Protein TraC                                                                                                                             |
| 30   | 508   | 0.02      | A0A090I137 | <i>Methanobacterium formicum</i> | Transposase                                                                                                                              |
| 31   | 506   | 0.02      | Q747C7     | <i>Geobacter sulfurreducens</i>  | 60 kDa chaperonin (GroEL protein) (Protein Cpn60)                                                                                        |

|    |     |      |            |                                     |                                                                                                                                                                                          |
|----|-----|------|------------|-------------------------------------|------------------------------------------------------------------------------------------------------------------------------------------------------------------------------------------|
| 32 | 505 | 0.02 | A0LQ17     | <i>Syntrophobacter fumaroxidans</i> | Helicase domain protein                                                                                                                                                                  |
| 33 | 468 | 0.02 |            |                                     |                                                                                                                                                                                          |
| 34 | 459 | 0.02 | A0A077XNB6 | <i>Sphinx1.76-related DNA</i>       | Replication protein                                                                                                                                                                      |
| 35 | 457 | 0.02 | A0A0T5YH86 | <i>Acinetobacter baumannii</i>      | Mobilization protein A                                                                                                                                                                   |
| 36 | 454 | 0.02 | A0A1G0M9J2 | <i>Geobacteraceae bacterium</i>     | Uncharacterized protein                                                                                                                                                                  |
| 37 | 452 | 0.02 | E1QK39     | <i>Desulfarculus baarsii</i>        | Helicase domain protein                                                                                                                                                                  |
| 38 | 447 | 0.02 | D8L7S1     | <i>Paramecium caudatum</i>          | NADH-ubiquinone oxidoreductase chain 5 (EC 1.6.5.3)                                                                                                                                      |
| 39 | 435 | 0.02 |            |                                     |                                                                                                                                                                                          |
| 40 | 434 | 0.02 | Q748X8     | <i>Geobacter sulfurreducens</i>     | Elongation factor Tu (EF-Tu)                                                                                                                                                             |
| 41 | 432 | 0.02 | A0A0D5N8M0 | <i>Geobacter sulfurreducens</i>     | MgtE integral membrane protein                                                                                                                                                           |
| 42 | 432 | 0.02 | A1AKN8     | <i>Pelobacter propionicus</i>       | Resolvase, N-terminal domain protein                                                                                                                                                     |
| 43 | 429 | 0.02 | A0A0B5BF68 | <i>Geobacter pickeringii</i>        | CRISPR-associated protein Cas3                                                                                                                                                           |
| 44 | 425 | 0.02 | A0A088WWT4 | <i>Burkholderia oklahomensis</i>    | Putative membrane protein                                                                                                                                                                |
| 45 | 420 | 0.02 |            |                                     |                                                                                                                                                                                          |
| 46 | 416 | 0.02 | F0FB90     | <i>Prevotella multiformis</i>       | Initiator RepB protein (Fragment)                                                                                                                                                        |
| 47 | 408 | 0.02 | Q749A7     | <i>Geobacter sulfurreducens</i>     | Protein translocase subunit SecY                                                                                                                                                         |
| 48 | 405 | 0.02 | A0A178FWP5 | <i>Acinetobacter sp. SFC</i>        | Transposase                                                                                                                                                                              |
| 49 | 405 | 0.02 | F0FB88     | <i>Prevotella multiformis</i>       | Putative plasmid recombination enzyme                                                                                                                                                    |
| 50 | 403 | 0.02 | D8L7Q9     | <i>Paramecium caudatum</i>          | Ymf66                                                                                                                                                                                    |
| 51 | 403 | 0.02 | D8L7R1     | <i>Paramecium caudatum</i>          | NADH-ubiquinone oxidoreductase chain 4 (EC 1.6.5.3)                                                                                                                                      |
| 52 | 388 | 0.02 | A1AKK8     | <i>Pelobacter propionicus</i>       | Uncharacterized protein                                                                                                                                                                  |
| 53 | 388 | 0.02 | Q747H5     | <i>Geobacter sulfurreducens</i>     | K(+)-insensitive pyrophosphate-energized proton pump (EC 3.6.1.1) (Membrane-bound proton-translocating pyrophosphatase) (Pyrophosphate-energized inorganic pyrophosphatase) (H(+)-PPase) |
| 54 | 387 | 0.02 | Q748Y8     | <i>Geobacter sulfurreducens</i>     | Elongation factor G 2 (EF-G 2)                                                                                                                                                           |
| 55 | 386 | 0.02 | A0A0B5BF21 | <i>Geobacter pickeringii</i>        | Glycosyl transferase family 1                                                                                                                                                            |
| 56 | 382 | 0.02 | Q39Q43     | <i>Geobacter metallireducens</i>    | Pyruvate-flavodoxin oxidoreductase (EC 1.2.7.-)                                                                                                                                          |
| 57 | 381 | 0.02 |            |                                     |                                                                                                                                                                                          |
| 58 | 378 | 0.02 | A0A1F9PUL2 | <i>Desulfuromonadales bacterium</i> | Restriction endonuclease                                                                                                                                                                 |
| 59 | 378 | 0.02 | Q39QB9     | <i>Geobacter metallireducens</i>    | NADH dehydrogenase I, M subunit                                                                                                                                                          |
| 60 | 375 | 0.02 | A0A1D3L4G2 | <i>Methanobacterium congolense</i>  | Uncharacterized protein                                                                                                                                                                  |
| 61 | 370 | 0.02 | A7I7H9     | <i>Methanoregula boonei</i>         | TPR repeat-containing protein                                                                                                                                                            |
| 62 | 368 | 0.02 | Q39U60     | <i>Geobacter metallireducens</i>    | Translation elongation factor G                                                                                                                                                          |

|    |     |      |            |                                  |                                                                                                         |
|----|-----|------|------------|----------------------------------|---------------------------------------------------------------------------------------------------------|
| 63 | 362 | 0.02 | A0A0B5BJ81 | <i>Geobacter pickeringii</i>     | NADH-quinone oxidoreductase subunit D (EC 1.6.5.11) (NADH dehydrogenase I subunit D) (NDH-1 subunit D)  |
| 64 | 361 | 0.02 | A0A0U1CQ28 | <i>Chlamydia trachomatis</i>     | Replication protein                                                                                     |
| 65 | 359 | 0.02 |            |                                  |                                                                                                         |
| 66 | 354 | 0.02 | Q74FF1     | <i>Geobacter sulfurreducens</i>  | Chaperone protein ClpB                                                                                  |
| 67 | 348 | 0.02 | Q39WU2     | <i>Geobacter metallireducens</i> | Phosphate-selective outer membrane channel                                                              |
| 68 | 348 | 0.02 | Q747X9     | <i>Geobacter sulfurreducens</i>  | Isoleucine--tRNA ligase (EC 6.1.1.5) (Isoleucyl-tRNA synthetase) (IleRS)                                |
| 69 | 345 | 0.02 | Q39YK5     | <i>Geobacter metallireducens</i> | Flagellar biogenesis protein FlhA                                                                       |
| 70 | 343 | 0.02 | A0A0B5BCT5 | <i>Geobacter pickeringii</i>     | NADH dehydrogenase                                                                                      |
| 71 | 341 | 0.02 | B3EA87     | <i>Geobacter lovleyi</i>         | RNA polymerase sigma factor                                                                             |
| 72 | 339 | 0.02 | Q39QB2     | <i>Geobacter metallireducens</i> | NADH dehydrogenase I, F subunit                                                                         |
| 73 | 338 | 0.02 | A0A1T4RHG2 | <i>Geobacter thiogenes</i>       | Nif-specific regulatory protein                                                                         |
| 74 | 338 | 0.02 | P15689     | <i>Paramecium tetraurelia</i>    | NADH-ubiquinone oxidoreductase 49 kDa subunit (EC 1.6.5.3) (EC 1.6.99.3) (NADH dehydrogenase subunit 7) |
| 75 | 338 | 0.02 | Q39ZC8     | <i>Geobacter metallireducens</i> | Ferredoxin-dependent glutamate synthase                                                                 |
| 76 | 335 | 0.02 | N8YFI4     | <i>Acinetobacter gernerii</i>    | Uncharacterized protein                                                                                 |
| 77 | 332 | 0.02 | A0A0L8ETQ7 | <i>Achromobacter sp. DMS1</i>    | Uncharacterized protein                                                                                 |
| 78 | 332 | 0.02 |            |                                  |                                                                                                         |
| 79 | 330 | 0.02 | A0A0B5B7H3 | <i>Geobacter pickeringii</i>     | Cytochrome C                                                                                            |
| 80 | 328 | 0.02 | A0A1S0XXD8 | <i>Rhodanobacter sp.</i>         | Histidine kinase                                                                                        |
| 81 | 326 | 0.02 |            |                                  |                                                                                                         |
| 82 | 324 | 0.02 | A7I4I9     | <i>Methanoregula boonei</i>      | DNA polymerase II large subunit (Pol II) (EC 2.7.7.7)                                                   |
| 83 | 324 | 0.02 | Q74FK9     | <i>Geobacter sulfurreducens</i>  | Sigma-54-dependent transcriptional response regulator                                                   |
| 84 | 323 | 0.01 | Q74C76     | <i>Geobacter sulfurreducens</i>  | (R)-citramalate synthase (EC 2.3.1.182) (Citramalate synthase)                                          |
| 85 | 323 | 0.01 |            |                                  |                                                                                                         |
| 86 | 321 | 0.01 | A0A0D5NDJ8 | <i>Geobacter sulfurreducens</i>  | Stage II sporulation protein E                                                                          |
| 87 | 319 | 0.01 | A0A0D5N8Q2 | <i>Geobacter sulfurreducens</i>  | Uncharacterized protein                                                                                 |
| 88 | 319 | 0.01 | Q74FM6     | <i>Geobacter sulfurreducens</i>  | Pyruvate, phosphate dikinase (EC 2.7.9.1)                                                               |
| 89 | 317 | 0.01 | E1QK33     | <i>Desulfarculus baarsii</i>     | ATP-binding region ATPase domain protein                                                                |
| 90 | 316 | 0.01 | A0A1G0MAK9 | <i>Geobacteraceae bacterium</i>  | Sodium:proton exchanger                                                                                 |
| 91 | 316 | 0.01 | Q39QD0     | <i>Geobacter metallireducens</i> | Periplasmically oriented, membrane-bound [NiFe]-hydrogenase, large subunit                              |
| 92 | 315 | 0.01 | A5GFJ7     | <i>Geobacter uraniiireducens</i> | Erythronolide synthase (EC 2.3.1.94)                                                                    |
| 93 | 315 | 0.01 | A7IAM2     | <i>Methanoregula boonei</i>      | Isoleucine--tRNA ligase (EC 6.1.1.5) (Isoleucyl-tRNA synthetase) (IleRS)                                |
| 94 | 314 | 0.01 | B3EB58     | <i>Geobacter lovleyi</i>         | Uncharacterized protein                                                                                 |
| 95 | 310 | 0.01 |            |                                  |                                                                                                         |

|     |     |      |            |                                  |                                                                                                                                          |
|-----|-----|------|------------|----------------------------------|------------------------------------------------------------------------------------------------------------------------------------------|
| 96  | 306 | 0.01 | D4H381     | <i>Denitrovibrio acetiphilus</i> | DNA-directed RNA polymerase subunit beta (RNAP subunit beta) (EC 2.7.7.6) (RNA polymerase subunit beta) (Transcriptase subunit beta)     |
| 97  | 305 | 0.01 | Q74FD5     | <i>Geobacter sulfurreducens</i>  | Hydroxylamine reductase (EC 1.7.99.1) (Hybrid-cluster protein) (HCP) (Prismane protein)                                                  |
| 98  | 303 | 0.01 | A0A0U1CQ01 | <i>Chlamydia trachomatis</i>     | Uncharacterised protein                                                                                                                  |
| 99  | 303 | 0.01 | Q39RM8     | <i>Geobacter metallireducens</i> | Glycosyltransferase                                                                                                                      |
| 100 | 303 | 0.01 | Q39ZE7     | <i>Geobacter metallireducens</i> | UvrABC system protein A (UvrA protein) (Excinuclease ABC subunit A)                                                                      |
| 101 | 303 | 0.01 |            |                                  |                                                                                                                                          |
| 102 | 302 | 0.01 | A0A0D5NE26 | <i>Geobacter sulfurreducens</i>  | Multidrug resistance protein B                                                                                                           |
| 103 | 300 | 0.01 | A0A0B5B8A8 | <i>Geobacter pickeringii</i>     | Valine--tRNA ligase (EC 6.1.1.9) (Valyl-tRNA synthetase) (ValRS)                                                                         |
| 104 | 299 | 0.01 | Q74H82     | <i>Geobacter sulfurreducens</i>  | Flagellar biogenesis master response receiver sensor histidine kinase, PAS and GAF domain-containing                                     |
| 105 | 298 | 0.01 | A0A0D5NDD6 | <i>Geobacter sulfurreducens</i>  | Type II secretion system protein E                                                                                                       |
| 106 | 296 | 0.01 | D4H382     | <i>Denitrovibrio acetiphilus</i> | DNA-directed RNA polymerase subunit beta' (RNAP subunit beta') (EC 2.7.7.6) (RNA polymerase subunit beta') (Transcriptase subunit beta') |
| 107 | 295 | 0.01 | A0A1G0M577 | <i>Geobacteraceae bacterium</i>  | Uncharacterized protein                                                                                                                  |
| 108 | 294 | 0.01 | Q74FW2     | <i>Geobacter sulfurreducens</i>  | Succinyl:acetate coenzyme A transferase                                                                                                  |
| 109 | 293 | 0.01 | A0A0B5BJ46 | <i>Geobacter pickeringii</i>     | Uncharacterized protein                                                                                                                  |
| 110 | 292 | 0.01 | A0A0B5BB65 | <i>Geobacter pickeringii</i>     | Uncharacterized protein                                                                                                                  |
| 111 | 292 | 0.01 | E8WU24     | <i>Geobacter sp.</i>             | Helicase domain protein                                                                                                                  |
| 112 | 292 | 0.01 | Q39Y76     | <i>Geobacter metallireducens</i> | Sigma-54-dependent transcriptional response regulator                                                                                    |
| 113 | 290 | 0.01 | Q74H58     | <i>Geobacter sulfurreducens</i>  | Chaperone protein DnaJ                                                                                                                   |
| 114 | 287 | 0.01 | A0A0B5BI89 | <i>Geobacter pickeringii</i>     | Type II secretion system protein                                                                                                         |
| 115 | 287 | 0.01 | Q746X3     | <i>Geobacter sulfurreducens</i>  | Bifunctional protein PutA                                                                                                                |
| 116 | 287 | 0.01 | Q748Z4     | <i>Geobacter sulfurreducens</i>  | 30S ribosomal protein S3                                                                                                                 |
| 117 | 286 | 0.01 | A0A0D5N712 | <i>Geobacter sulfurreducens</i>  | Phosphoglucomutase                                                                                                                       |
| 118 | 286 | 0.01 | A0A1G0LE89 | <i>Geobacteraceae bacterium</i>  | Aconitate hydratase (Aconitase) (EC 4.2.1.3)                                                                                             |
| 119 | 286 | 0.01 |            |                                  |                                                                                                                                          |
| 120 | 283 | 0.01 | A0A0B5BDJ5 | <i>Geobacter pickeringii</i>     | NADH-quinone oxidoreductase subunit H (EC 1.6.5.11) (NADH dehydrogenase I subunit H) (NDH-1 subunit H)                                   |
| 121 | 282 | 0.01 | A0A0B5BH93 | <i>Geobacter pickeringii</i>     | C-and b-type cytochrome L                                                                                                                |
| 122 | 282 | 0.01 | A0A0C1TL30 | <i>Geobacter soli</i>            | Flagellar basal body stator protein MotB                                                                                                 |
| 123 | 282 | 0.01 | F3ZQL8     | <i>Bacteroides coprosuis</i>     | Transposase IS4 family protein                                                                                                           |
| 124 | 281 | 0.01 |            |                                  |                                                                                                                                          |
| 125 | 280 | 0.01 | Q39T74     | <i>Geobacter metallireducens</i> | GTP/GDP 3'-pyrophosphokinase and (P)ppGpp 3'-pyrophosphohydrolase                                                                        |
| 126 | 279 | 0.01 | A0A0D5N8G6 | <i>Geobacter sulfurreducens</i>  | Cation transporter                                                                                                                       |



|     |     |      |            |                                     |                                                                                                                                                                                                                                                                                                                                                  |
|-----|-----|------|------------|-------------------------------------|--------------------------------------------------------------------------------------------------------------------------------------------------------------------------------------------------------------------------------------------------------------------------------------------------------------------------------------------------|
| 127 | 278 | 0.01 | Q39QJ8     | <i>Geobacter metallireducens</i>    | Flagellar biogenesis master sigma-54-dependent transcriptional response regulator                                                                                                                                                                                                                                                                |
| 128 | 277 | 0.01 | F4BUN6     | <i>Methanosaeta concilii</i>        | Transposase, IS116/IS110/IS902 family                                                                                                                                                                                                                                                                                                            |
| 129 | 277 | 0.01 | Q8VQM9     | <i>Prevotella intermedia</i>        | Replication protein                                                                                                                                                                                                                                                                                                                              |
| 130 | 276 | 0.01 | A0A0B5BAC1 | <i>Geobacter pickeringii</i>        | Dihydrolipoyl dehydrogenase (EC 1.8.1.4)                                                                                                                                                                                                                                                                                                         |
| 131 | 276 | 0.01 | A0A0D5N8I5 | <i>Geobacter sulfurreducens</i>     | Signal recognition particle protein (Fifty-four homolog)                                                                                                                                                                                                                                                                                         |
| 132 | 273 | 0.01 | D8L7S0     | <i>Paramecium caudatum</i>          | Cytochrome c oxidase subunit 2                                                                                                                                                                                                                                                                                                                   |
| 133 | 273 | 0.01 | Q747M6     | <i>Geobacter sulfurreducens</i>     | Ribonuclease G                                                                                                                                                                                                                                                                                                                                   |
| 134 | 273 | 0.01 |            |                                     |                                                                                                                                                                                                                                                                                                                                                  |
| 135 | 272 | 0.01 | A0A0B5BDG0 | <i>Geobacter pickeringii</i>        | ATP-dependent Clp protease proteolytic subunit (EC 3.4.21.92) (Endopeptidase Clp)                                                                                                                                                                                                                                                                |
| 136 | 272 | 0.01 | A0A0D5N8S3 | <i>Geobacter sulfurreducens</i>     | NADH dehydrogenase                                                                                                                                                                                                                                                                                                                               |
| 137 | 272 | 0.01 | B5EFV6     | <i>Geobacter bemidjensis</i>        | Bifunctional protein PutA                                                                                                                                                                                                                                                                                                                        |
| 138 | 271 | 0.01 | A0A1Q9F786 | <i>Symbiodinium microadriaticum</i> | Uncharacterized protein                                                                                                                                                                                                                                                                                                                          |
| 139 | 270 | 0.01 | Q74B77     | <i>Geobacter sulfurreducens</i>     | Uncharacterized protein                                                                                                                                                                                                                                                                                                                          |
| 140 | 269 | 0.01 |            |                                     |                                                                                                                                                                                                                                                                                                                                                  |
| 141 | 267 | 0.01 | A0A0B5BIS9 | <i>Geobacter pickeringii</i>        | Multidrug transporter AcrB                                                                                                                                                                                                                                                                                                                       |
| 142 | 267 | 0.01 | Q39ZH1     | <i>Geobacter metallireducens</i>    | Glutamine--fructose-6-phosphate aminotransferase [isomerizing] (EC 2.6.1.16) (D-fructose-6-phosphate amidotransferase) (GFAT) (Glucosamine-6-phosphate synthase) (Hexosephosphate aminotransferase) (L-glutamine--D-fructose-6-phosphate amidotransferase)                                                                                       |
| 143 | 267 | 0.01 | Q39ZK4     | <i>Geobacter metallireducens</i>    | Bifunctional glutamine synthetase adenylyltransferase/adenylyl-removing enzyme (ATP:glutamine synthetase adenylyltransferase) (ATase) [Includes: Glutamine synthetase adenylyl-L-tyrosine phosphorylase (EC 2.7.7.89) (Adenylyl remove) (AR) (AT-N); Glutamine synthetase adenylyl transferase (EC 2.7.7.42) (Adenylyl transferase) (AT) (AT-C)] |
| 144 | 266 | 0.01 | A0A0D5N8E2 | <i>Geobacter sulfurreducens</i>     | ATP synthase (EC 3.6.3.14)                                                                                                                                                                                                                                                                                                                       |
| 145 | 265 | 0.01 | A0A0C1U608 | <i>Geobacter soli</i>               | Chemotaxis protein                                                                                                                                                                                                                                                                                                                               |
| 146 | 265 | 0.01 | A0A0D5ND20 | <i>Geobacter sulfurreducens</i>     | Amino acid dehydrogenase                                                                                                                                                                                                                                                                                                                         |
| 147 | 265 | 0.01 | A0A0D5ND99 | <i>Geobacter sulfurreducens</i>     | ATPase AAA                                                                                                                                                                                                                                                                                                                                       |
| 148 | 265 | 0.01 | B3E9R4     | <i>Geobacter lovleyi</i>            | Isocitrate dehydrogenase, NADP-dependent (EC 1.1.1.42)                                                                                                                                                                                                                                                                                           |
| 149 | 265 | 0.01 |            |                                     |                                                                                                                                                                                                                                                                                                                                                  |
| 150 | 262 | 0.01 | A0A0D5NE46 | <i>Geobacter sulfurreducens</i>     | Molecular chaperone DnaJ                                                                                                                                                                                                                                                                                                                         |
| 151 | 262 | 0.01 | N8QHE7     | <i>Acinetobacter bohemicus</i>      | Uncharacterized protein                                                                                                                                                                                                                                                                                                                          |
| 152 | 262 | 0.01 | Q39QB8     | <i>Geobacter metallireducens</i>    | NADH dehydrogenase I, L subunit                                                                                                                                                                                                                                                                                                                  |
| 153 | 260 | 0.01 | Q39Q36     | <i>Geobacter metallireducens</i>    | Heterodisulfide oxidoreductase, FAD-binding and iron-sulfur cluster-binding subunit A                                                                                                                                                                                                                                                            |
| 154 | 259 | 0.01 | A0A0B5BK17 | <i>Geobacter pickeringii</i>        | Diguanylate cyclase                                                                                                                                                                                                                                                                                                                              |

|     |     |      |            |                                     |                                                                                                             |
|-----|-----|------|------------|-------------------------------------|-------------------------------------------------------------------------------------------------------------|
| 155 | 259 | 0.01 | Q39XL9     | <i>Geobacter metallireducens</i>    | Sensor sigma-54-dependent transcriptional regulator, GAF and GAF domain-containing                          |
| 156 | 257 | 0.01 | Q39RL8     | <i>Geobacter metallireducens</i>    | Undecaprenyl-diphospho-oligosaccharide flippase                                                             |
| 157 | 257 | 0.01 | Q747G2     | <i>Geobacter sulfurreducens</i>     | Outer membrane channel OmpJ                                                                                 |
| 158 | 256 | 0.01 | A5GB28     | <i>Geobacter sulfurreducens</i>     | Plasmid maintenance system antidote protein, XRE family                                                     |
| 159 | 256 | 0.01 | Q74AK3     | <i>Geobacter sulfurreducens</i>     | Cation-translocating P-type ATPase                                                                          |
| 160 | 254 | 0.01 | Q39PS2     | <i>Geobacter metallireducens</i>    | Transcription-repair-coupling factor (TRCF) (EC 3.6.4.-)                                                    |
| 161 | 253 | 0.01 | A0A0B5BH05 | <i>Geobacter pickeringii</i>        | Malic enzyme (EC 1.1.1.40)                                                                                  |
| 162 | 253 | 0.01 | Q749N5     | <i>Geobacter sulfurreducens</i>     | Acetate kinase (EC 2.7.2.1) (Acetokinase)                                                                   |
| 163 | 253 | 0.01 | Q39V52     | <i>Geobacter metallireducens</i>    | GAF sensor methyl-accepting chemotaxis sensory transducer, class 40H                                        |
| 164 | 250 | 0.01 | A7IAV3     | <i>Methanoregula boonei</i>         | V-type ATP synthase subunit I                                                                               |
| 165 | 250 | 0.01 | Q74BC2     | <i>Geobacter sulfurreducens</i>     | Integrative genetic element Gsu56, integrase                                                                |
| 166 | 249 | 0.01 | A0A0C5IZ87 | <i>Rugosibacter aromaticivorans</i> | Uncharacterized protein                                                                                     |
| 167 | 248 | 0.01 | A0A0A8WPS5 | <i>Geobacter sp.</i>                | Efflux pump membrane transporter                                                                            |
| 168 | 248 | 0.01 | A0A0D5N849 | <i>Geobacter sulfurreducens</i>     | DNA polymerase III subunit gamma/tau (EC 2.7.7.7)                                                           |
| 169 | 248 | 0.01 | A5GFJ6     | <i>Geobacter uraniireducens</i>     | Beta-hydroxyacyl-(Acyl-carrier-protein) dehydratase, FabA/FabZ                                              |
| 170 | 248 | 0.01 | A7IAD8     | <i>Methanoregula boonei</i>         | Chromosome partition protein Smc                                                                            |
| 171 | 248 | 0.01 | Q74GY2     | <i>Geobacter sulfurreducens</i>     | ATP synthase subunit alpha (EC 3.6.3.14) (ATP synthase F1 sector subunit alpha) (F-ATPase subunit alpha)    |
| 172 | 248 | 0.01 | Q39UR9     | <i>Geobacter metallireducens</i>    | Carbamoyl-phosphate synthase large chain (EC 6.3.5.5) (Carbamoyl-phosphate synthetase ammonia chain)        |
| 173 | 248 | 0.01 |            |                                     |                                                                                                             |
| 174 | 246 | 0.01 | A0A0B5BDE2 | <i>Geobacter pickeringii</i>        | ATP phosphoribosyltransferase regulatory subunit                                                            |
| 175 | 246 | 0.01 | Q74GG6     | <i>Geobacter sulfurreducens</i>     | Chromosomal replication initiator protein DnaA                                                              |
| 176 | 245 | 0.01 | A0A0D5N5P7 | <i>Geobacter sulfurreducens</i>     | Chemotaxis protein                                                                                          |
| 177 | 244 | 0.01 | A7I9N6     | <i>Methanoregula boonei</i>         | DNA-directed RNA polymerase subunit (EC 2.7.7.6)                                                            |
| 178 | 244 | 0.01 | F5UKT4     | <i>Microcoleus vaginatus</i>        | Polymorphic outer membrane protein                                                                          |
| 179 | 244 | 0.01 | Q39QP7     | <i>Geobacter metallireducens</i>    | Lon protease (EC 3.4.21.53) (ATP-dependent protease La)                                                     |
| 180 | 244 | 0.01 | Q39YH3     | <i>Geobacter metallireducens</i>    | UDP-N-acetylglucosamine 4,6-dehydratase and UDP-2-acetamido-2,6-dideoxy-alpha-D-xylo-4-hexulose 5-epimerase |
| 181 | 243 | 0.01 | A0A0B5B9H5 | <i>Geobacter pickeringii</i>        | Uncharacterized protein                                                                                     |
| 182 | 243 | 0.01 | A1AM25     | <i>Pelobacter propionicus</i>       | Squalene-hopene cyclase                                                                                     |
| 183 | 243 | 0.01 |            |                                     |                                                                                                             |
| 184 | 242 | 0.01 | A0A0B5BD43 | <i>Geobacter pickeringii</i>        | ABC transporter permease                                                                                    |

|     |     |      |            |                                      |                                                                                                                                                                                                                                                                                                                          |
|-----|-----|------|------------|--------------------------------------|--------------------------------------------------------------------------------------------------------------------------------------------------------------------------------------------------------------------------------------------------------------------------------------------------------------------------|
| 185 | 242 | 0.01 | A7I486     | <i>Methanoregula boonei</i>          | K(+)-insensitive pyrophosphate-energized proton pump (EC 3.6.1.1) (Membrane-bound proton-translocating pyrophosphatase) (Pyrophosphate-energized inorganic pyrophosphatase) (H(+)-PPase)                                                                                                                                 |
| 186 | 241 | 0.01 | A5GD4      | <i>Geobacter uraniireducens</i>      | DNA gyrase subunit B (EC 5.99.1.3)                                                                                                                                                                                                                                                                                       |
| 187 | 240 | 0.01 | B9M4C2     | <i>Geobacter daltonii</i>            | Squalene cyclase                                                                                                                                                                                                                                                                                                         |
| 188 | 240 | 0.01 | E1QK40     | <i>Desulfarculus baarsii</i>         | DNA-cytosine methyltransferase                                                                                                                                                                                                                                                                                           |
| 189 | 240 | 0.01 | Q746S4     | <i>Geobacter sulfurreducens</i>      | NADH-quinone oxidoreductase subunit B/C/D (EC 1.6.5.11) (NADH dehydrogenase I subunit B/C/D) (NDH-1 subunit B/C/D)                                                                                                                                                                                                       |
| 190 | 239 | 0.01 | AOA0D5N8X4 | <i>Geobacter sulfurreducens</i>      | Flagellar M-ring protein                                                                                                                                                                                                                                                                                                 |
| 191 | 239 | 0.01 | E6VQ93     | <i>Rhodopseudomonas palustris</i>    | Putative methylase/helicase                                                                                                                                                                                                                                                                                              |
| 192 | 238 | 0.01 | AOA1F8XVG3 | <i>Deltaproteobacteria bacterium</i> | Helicase                                                                                                                                                                                                                                                                                                                 |
| 193 | 238 | 0.01 | A5GF11     | <i>Geobacter uraniireducens</i>      | Acetyl-CoA carboxylase carboxyltransferase subunit alpha (EC 6.3.4.14)                                                                                                                                                                                                                                                   |
| 194 | 238 | 0.01 | N8VN75     | <i>Acinetobacter sp.</i>             | Uncharacterized protein                                                                                                                                                                                                                                                                                                  |
| 195 | 237 | 0.01 | AOA0D5NAK5 | <i>Geobacter sulfurreducens</i>      | Bifunctional uridylyltransferase/uridylyl-removing enzyme (UTase/UR) (Bifunctional [protein-P11] modification enzyme) (Bifunctional nitrogen sensor protein) [Includes: [Protein-P11]-UMP uridylyl-removing enzyme (UR) (EC 3.1.4.-); [Protein-P11] uridylyltransferase (P11 uridylyltransferase) (UTase) (EC 2.7.7.59)] |
| 196 | 237 | 0.01 | A0R7X1     | <i>Pelobacter propionicus</i>        | Type III restriction enzyme, res subunit                                                                                                                                                                                                                                                                                 |
| 197 | 237 | 0.01 | Q39R25     | <i>Geobacter metallireducens</i>     | Sensor diguanylate cyclase/phosphodiesterase, PAS, PAS and PAS domain-containing                                                                                                                                                                                                                                         |
| 198 | 236 | 0.01 | AOA0B5BG19 | <i>Geobacter pickeringii</i>         | Lon protease (EC 3.4.21.53) (ATP-dependent protease La)                                                                                                                                                                                                                                                                  |
| 199 | 236 | 0.01 | AOA0B5BK56 | <i>Geobacter pickeringii</i>         | Lon protease (EC 3.4.21.53) (ATP-dependent protease La)                                                                                                                                                                                                                                                                  |
| 200 | 235 | 0.01 | D2VLN5     | <i>Naegleria gruberi (Amoeba)</i>    | Predicted protein (Fragment)                                                                                                                                                                                                                                                                                             |
| 201 | 235 | 0.01 |            |                                      |                                                                                                                                                                                                                                                                                                                          |
| 202 | 234 | 0.01 | P61679     | <i>Geobacter sulfurreducens</i>      | UDP-N-acetylmuramate--L-alanine ligase (EC 6.3.2.8) (UDP-N-acetylmuramoyl-L-alanine synthetase)                                                                                                                                                                                                                          |
| 203 | 234 | 0.01 | P61667     | <i>Geobacter sulfurreducens</i>      | DNA mismatch repair protein MutS                                                                                                                                                                                                                                                                                         |
| 204 | 233 | 0.01 | AOA0D5NAW4 | <i>Geobacter sulfurreducens</i>      | Cation transporter                                                                                                                                                                                                                                                                                                       |
| 205 | 232 | 0.01 | AOA0B5BC86 | <i>Geobacter pickeringii</i>         | Multicopper oxidase                                                                                                                                                                                                                                                                                                      |
| 206 | 232 | 0.01 | AOA0B5BK89 | <i>Geobacter pickeringii</i>         | FAD-binding protein                                                                                                                                                                                                                                                                                                      |
| 207 | 232 | 0.01 | Q74F57     | <i>Geobacter sulfurreducens</i>      | Membrane protein, major facilitator superfamily                                                                                                                                                                                                                                                                          |
| 208 | 230 | 0.01 | Q74GY0     | <i>Geobacter sulfurreducens</i>      | ATP synthase subunit beta (EC 3.6.3.14) (ATP synthase F1 sector subunit beta) (F-ATPase subunit beta)                                                                                                                                                                                                                    |
| 209 | 230 | 0.01 | Q39QJ5     | <i>Geobacter metallireducens</i>     | Sensor histidine kinase CheA associated with MCPs of classes 40H and 40+24H                                                                                                                                                                                                                                              |
| 210 | 229 | 0.01 | AOA0B5BDW0 | <i>Geobacter pickeringii</i>         | Leucine--tRNA ligase (EC 6.1.1.4) (Leucyl-tRNA synthetase) (LeuRS)                                                                                                                                                                                                                                                       |

|     |     |      |            |                                     |                                                                                         |
|-----|-----|------|------------|-------------------------------------|-----------------------------------------------------------------------------------------|
| 211 | 229 | 0.01 | A7IAB8     | <i>Methanoregula boonei</i>         | Phosphoenolpyruvate synthase (PEP synthase) (EC 2.7.9.2) (Pyruvate, water dikinase)     |
| 212 | 229 | 0.01 | B9M5J7     | <i>Geobacter daltonii</i>           | CRISPR-associated protein Csd2                                                          |
| 213 | 229 | 0.01 | Q39QY3     | <i>Geobacter metallireducens</i>    | Efflux pump, RND family, inner membrane protein                                         |
| 214 | 228 | 0.01 | A0A0B5B668 | <i>Geobacter pickeringii</i>        | Peptidase U32                                                                           |
| 215 | 228 | 0.01 | Q39QU2     | <i>Geobacter metallireducens</i>    | Phosphoenolpyruvate carboxykinase (ATP) (PCK) (PEP carboxykinase) (PEPCK) (EC 4.1.1.49) |
| 216 | 228 | 0.01 | Q39X91     | <i>Geobacter metallireducens</i>    | DNA topoisomerase 1 (EC 5.99.1.2) (DNA topoisomerase I)                                 |
| 217 | 227 | 0.01 | A0A0D5N6Q1 | <i>Geobacter sulfurreducens</i>     | FeS-binding protein                                                                     |
| 218 | 227 | 0.01 | A0A0L8EU90 | <i>Achromobacter sp. DMS1</i>       | Uncharacterized protein                                                                 |
| 219 | 227 | 0.01 | A7I927     | <i>Methanoregula boonei</i>         | Valine--tRNA ligase (EC 6.1.1.9) (Valyl-tRNA synthetase) (ValRS)                        |
| 220 | 227 | 0.01 | B9M1D8     | <i>Geobacter daltonii</i>           | Cyclic diguanylate phosphodiesterase                                                    |
| 221 | 226 | 0.01 | A0A0B5BBC9 | <i>Geobacter pickeringii</i>        | Type I citrate synthase (EC 2.3.3.1)                                                    |
| 222 | 226 | 0.01 | A0A0D5N2S0 | <i>Geobacter sulfurreducens</i>     | Uncharacterized protein                                                                 |
| 223 | 226 | 0.01 | A0A1F9PXI1 | <i>Desulfuromonadales bacterium</i> | Cytosine-specific methyltransferase (EC 2.1.1.37)                                       |
| 224 | 226 | 0.01 | A5G9A7     | <i>Geobacter uraniiireducens</i>    | NADH dehydrogenase subunit M (EC 1.6.5.3)                                               |
| 225 | 226 | 0.01 | B5EGM4     | <i>Geobacter bemidjensis</i>        | Glycerol/1,2-propanediol dehydratase                                                    |
| 226 | 225 | 0.01 | A0A0B4XMH5 | <i>Alcanivorax pacificus</i>        | Adenine-specific DNA methylase containing a Zn-ribbon                                   |
| 227 | 225 | 0.01 | Q74C83     | <i>Geobacter sulfurreducens</i>     | ATP-dependent Clp protease ATP-binding subunit ClpX                                     |
| 228 | 225 | 0.01 | E1QK35     | <i>Desulfarculus baarsii</i>        | Uncharacterized protein                                                                 |
| 229 | 225 | 0.01 | Q74BB9     | <i>Geobacter sulfurreducens</i>     | TraG family protein                                                                     |
| 230 | 224 | 0.01 | A0A0B5BIQ7 | <i>Geobacter pickeringii</i>        | Flagellar basal-body rod protein FlgF (Flagellar hook protein FlgE)                     |
| 231 | 224 | 0.01 | A5G7V6     | <i>Geobacter uraniiireducens</i>    | Dihydroxy-acid dehydratase (DAD) (EC 4.2.1.9)                                           |
| 232 | 223 | 0.01 | A0A0D5NCW1 | <i>Geobacter sulfurreducens</i>     | Histidine kinase                                                                        |
| 233 | 223 | 0.01 | Q39Q79     | <i>Geobacter metallireducens</i>    | Winged-helix transcriptional response regulator                                         |
| 234 | 221 | 0.01 | A0A0B5BCL9 | <i>Geobacter pickeringii</i>        | Uncharacterized protein                                                                 |
| 235 | 221 | 0.01 | A7I9M8     | <i>Methanoregula boonei</i>         | Leucine--tRNA ligase (EC 6.1.1.4) (Leucyl-tRNA synthetase) (LeuRS)                      |
| 236 | 221 | 0.01 | A7I4X4     | <i>Methanoregula boonei</i>         | Elongation factor 2 (EF-2)                                                              |
| 237 | 221 | 0.01 | N8YF58     | <i>Acinetobacter gernerii</i>       | Uncharacterized protein                                                                 |
| 238 | 221 | 0.01 | Q39WG2     | <i>Geobacter metallireducens</i>    | Chromosome partition protein Smc                                                        |
| 239 | 221 | 0.01 |            |                                     |                                                                                         |
| 240 | 220 | 0.01 | A0A0B5BCB2 | <i>Geobacter pickeringii</i>        | Nitrogen fixation protein NifE                                                          |
| 241 | 220 | 0.01 | A0A0B5BCZ8 | <i>Geobacter pickeringii</i>        | Succinate dehydrogenase (EC 1.3.5.1)                                                    |
| 242 | 220 | 0.01 | A0A0B5BJ26 | <i>Geobacter pickeringii</i>        | Uncharacterized protein                                                                 |

|     |     |      |            |                                      |                                                                                                                                          |
|-----|-----|------|------------|--------------------------------------|------------------------------------------------------------------------------------------------------------------------------------------|
| 243 | 220 | 0.01 | A0A0D5N7I1 | <i>Geobacter sulfurreducens</i>      | NADH-quinone oxidoreductase subunit N (EC 1.6.5.11) (NADH dehydrogenase I subunit N) (NDH-1 subunit N)                                   |
| 244 | 220 | 0.01 | Q39U54     | <i>Geobacter metallireducens</i>     | Sensor histidine kinase cyclic nucleotide phosphodiesterase, GAF, GAF and HD-GYP-related domain-containing                               |
| 245 | 220 | 0.01 | Q74AJ5     | <i>Geobacter sulfurreducens</i>      | Glycoside hydrolase, family 57, DUF3536 domain-containing                                                                                |
| 246 | 220 | 0.01 | A5GAY2     | <i>Geobacter uraniireducens</i>      | DNA-directed RNA polymerase subunit beta' (RNAP subunit beta') (EC 2.7.7.6) (RNA polymerase subunit beta') (Transcriptase subunit beta') |
| 247 | 219 | 0.01 | A0A0B5BIF0 | <i>Geobacter pickeringii</i>         | NADH-ubiquinone oxidoreductase subunit 3                                                                                                 |
| 248 | 219 | 0.01 | A0A1G0LEY2 | <i>Geobacteraceae bacterium</i>      | Uncharacterized protein                                                                                                                  |
| 249 | 219 | 0.01 | A0A1T4LST4 | <i>Geobacter thiogenes</i>           | Multidrug efflux pump subunit AcrB                                                                                                       |
| 250 | 219 | 0.01 | A7I6J1     | <i>Methanoregula boonei</i>          | Carbamoyl-phosphate synthase large chain (EC 6.3.5.5) (Carbamoyl-phosphate synthetase ammonia chain)                                     |
| 251 | 219 | 0.01 | S0G1I5     | <i>Desulfotignum phosphitoxidans</i> | Type I restriction enzyme HindVIIP/EcoKI protein HsdR (EC 3.1.21.3)                                                                      |
| 252 | 218 | 0.01 | A0A0B5BKE7 | <i>Geobacter pickeringii</i>         | NADH-quinone oxidoreductase subunit N (EC 1.6.5.11) (NADH dehydrogenase I subunit N) (NDH-1 subunit N)                                   |
| 253 | 218 | 0.01 | A0A0D5N7N0 | <i>Geobacter sulfurreducens</i>      | Glutamate synthase                                                                                                                       |
| 254 | 218 | 0.01 | A0A154DNE7 | <i>Acinetobacter baumannii</i>       | mRNA endoribonuclease LS (EC 3.1.-.-)                                                                                                    |
| 255 | 218 | 0.01 | A5GCN0     | <i>Geobacter uraniireducens</i>      | Short chain amide porin                                                                                                                  |
| 256 | 217 | 0.01 | A0A0B5BG42 | <i>Geobacter pickeringii</i>         | Vitamin B12-dependent ribonucleotide reductase (EC 1.17.4.1)                                                                             |
| 257 | 217 | 0.01 | A0A0B5BHV9 | <i>Geobacter pickeringii</i>         | ATPase AAA                                                                                                                               |
| 258 | 217 | 0.01 | A0A0D5N400 | <i>Geobacter sulfurreducens</i>      | Uncharacterized protein                                                                                                                  |
| 259 | 217 | 0.01 | A0A1T4RGQ7 | <i>Geobacter thiogenes</i>           | NAD+---dinitrogen-reductase ADP-D-ribosyltransferase                                                                                     |
| 260 | 217 | 0.01 | Q39X64     | <i>Geobacter metallireducens</i>     | Cell shape-determining protein MreB                                                                                                      |
| 261 | 217 | 0.01 | A5GAY1     | <i>Geobacter uraniireducens</i>      | DNA-directed RNA polymerase subunit beta (RNAP subunit beta) (EC 2.7.7.6) (RNA polymerase subunit beta) (Transcriptase subunit beta)     |
| 262 | 216 | 0.01 | A0A0C1TL33 | <i>Geobacter soli</i>                | Uncharacterized protein                                                                                                                  |
| 263 | 216 | 0.01 | A7I485     | <i>Methanoregula boonei</i>          | Vitamin B12-dependent ribonucleotide reductase (EC 1.17.4.1)                                                                             |
| 264 | 216 | 0.01 | A7I791     | <i>Methanoregula boonei</i>          | UvrABC system protein A (UvrA protein) (Excinuclease ABC subunit A)                                                                      |
| 265 | 216 | 0.01 | Q74CR5     | <i>Geobacter sulfurreducens</i>      | Serine hydroxymethyltransferase (SHMT) (Serine methylase) (EC 2.1.2.1)                                                                   |
| 266 | 216 | 0.01 | Q39SJ2     | <i>Geobacter metallireducens</i>     | Nitrogen fixation master sigma-54-dependent transcriptional response regulator                                                           |
| 267 | 215 | 0.01 | A0A0D5N7R7 | <i>Geobacter sulfurreducens</i>      | GntR family transcriptional regulator                                                                                                    |
| 268 | 215 | 0.01 | Q39RM6     | <i>Geobacter metallireducens</i>     | Glycosyltransferase                                                                                                                      |
| 269 | 215 | 0.01 | Q39SI5     | <i>Geobacter metallireducens</i>     | Fumarate hydratase class I (EC 4.2.1.2)                                                                                                  |
| 270 | 215 | 0.01 | Q39X99     | <i>Geobacter metallireducens</i>     | UDP-glucuronate 4-dehydrogenase, decarboxylating                                                                                         |
| 271 | 214 | 0.01 | A0A0B5BDE7 | <i>Geobacter pickeringii</i>         | Fis family transcriptional regulator                                                                                                     |

|     |     |      |            |                                     |                                                                                                          |
|-----|-----|------|------------|-------------------------------------|----------------------------------------------------------------------------------------------------------|
| 272 | 214 | 0.01 | B9M1Q4     | <i>Geobacter daltonii</i>           | Biotin-dependent acyl-CoA carboxylase, biotin carboxylase subunit                                        |
| 273 | 214 | 0.01 | Q74C70     | <i>Geobacter sulfurreducens</i>     | Phosphoglucosamine mutase (EC 5.4.2.10)                                                                  |
| 274 | 214 | 0.01 | Q39Y82     | <i>Geobacter metallireducens</i>    | 5-methyltetrahydrofolate--homocysteine S-methyltransferase, cobalamin-dependent                          |
| 275 | 214 | 0.01 | Q74F32     | <i>Geobacter sulfurreducens</i>     | Periplasmically oriented, membrane-bound formate dehydrogenase, major subunit, selenocysteine-containing |
| 276 | 214 | 0.01 | A0A4W3     | <i>Geobacter sulfurreducens</i>     | Biosynthetic arginine decarboxylase (ADC) (EC 4.1.1.19)                                                  |
| 277 | 214 | 0.01 |            |                                     |                                                                                                          |
| 278 | 213 | 0.01 | A0A0B5BIA1 | <i>Geobacter pickeringii</i>        | DNA-directed DNA polymerase (EC 2.7.7.7)                                                                 |
| 279 | 213 | 0.01 | B9LZR8     | <i>Geobacter daltonii</i>           | Succinyl:acetate coenzyme A transferase                                                                  |
| 280 | 212 | 0.01 | A0A0B5BE38 | <i>Geobacter pickeringii</i>        | Transcription-repair-coupling factor (TRCF) (EC 3.6.4.-)                                                 |
| 281 | 212 | 0.01 | A0A0D5N419 | <i>Geobacter sulfurreducens</i>     | Uncharacterized protein                                                                                  |
| 282 | 212 | 0.01 | A1ANK6     | <i>Pelobacter propionicus</i>       | Peptidase C1A, papain                                                                                    |
| 283 | 212 | 0.01 | Q39YR4     | <i>Geobacter metallireducens</i>    | FtsK/SpoIIIE domain protein                                                                              |
| 284 | 210 | 0.01 | A0A0C1QTJ3 | <i>Geobacter soli</i>               | Hemolysin D                                                                                              |
| 285 | 210 | 0.01 | Q74EQ2     | <i>Geobacter sulfurreducens</i>     | Aldehyde:ferredoxin oxidoreductase, tungsten-containing                                                  |
| 286 | 209 | 0.01 | Q748I6     | <i>Geobacter sulfurreducens</i>     | Metalloprotease domain protein, M6 family                                                                |
| 287 | 208 | 0.01 | A0A0A8WNZ4 | <i>Geobacter sp. OR-1</i>           | DNA gyrase subunit A (EC 5.99.1.3)                                                                       |
| 288 | 208 | 0.01 | A0A0B5B8W1 | <i>Geobacter pickeringii</i>        | ATP-dependent zinc metalloprotease FtsH (EC 3.4.24.-)                                                    |
| 289 | 208 | 0.01 | B3EB49     | <i>Geobacter lovleyi</i>            | Uncharacterized protein                                                                                  |
| 290 | 208 | 0.01 | I9R3U4     | <i>Bacteroides cellulosilyticus</i> | Uncharacterized protein                                                                                  |
| 291 | 208 | 0.01 | Q39QK7     | <i>Geobacter metallireducens</i>    | Outer membrane channel OmpJ                                                                              |
| 292 | 208 | 0.01 | Q39ZQ2     | <i>Geobacter metallireducens</i>    | Uncharacterized protein                                                                                  |
| 293 | 207 | 0.01 | A0A0A8WQV9 | <i>Geobacter sp.</i>                | Protein TraU                                                                                             |
| 294 | 206 | 0.01 | A0A0B5BC52 | <i>Geobacter pickeringii</i>        | General secretion pathway protein GspD                                                                   |
| 295 | 206 | 0.01 | A0A0D5N732 | <i>Geobacter sulfurreducens</i>     | Transcription-repair-coupling factor (TRCF) (EC 3.6.4.-)                                                 |
| 296 | 206 | 0.01 | A7I8Y5     | <i>Methanoregula boonei</i>         | DEAD/DEAH box helicase domain protein                                                                    |
| 297 | 206 | 0.01 | Q39QT7     | <i>Geobacter metallireducens</i>    | Cytochrome c                                                                                             |
| 298 | 205 | 0.01 | A0A0B5BBF5 | <i>Geobacter pickeringii</i>        | Twin-arginine translocation pathway signal protein                                                       |
| 299 | 205 | 0.01 | A0A0B5BCI8 | <i>Geobacter pickeringii</i>        | Galactose-1-phosphate uridylyltransferase                                                                |
| 300 | 205 | 0.01 | A0A0E9G9S8 | <i>Chlamydia trachomatis</i>        | Uncharacterised protein                                                                                  |
| 301 | 205 | 0.01 | P60789     | <i>Geobacter sulfurreducens</i>     | Elongation factor 4 (EF-4) (EC 3.6.5.n1) (Ribosomal back-translocase LepA)                               |
| 302 | 205 | 0.01 | P05513     | <i>Paramecium tetraurelia</i>       | NADH-ubiquinone oxidoreductase chain 1 (EC 1.6.5.3) (NADH dehydrogenase subunit 1)                       |
| 303 | 205 | 0.01 | Q39XG6     | <i>Geobacter metallireducens</i>    | Pyruvate carboxylase (EC 6.4.1.1)                                                                        |
| 304 | 205 | 0.01 | Q747L0     | <i>Geobacter sulfurreducens</i>     | Glycoside hydrolase, family 57                                                                           |

|     |     |      |            |                                      |                                                                                                                                                                                                                                    |
|-----|-----|------|------------|--------------------------------------|------------------------------------------------------------------------------------------------------------------------------------------------------------------------------------------------------------------------------------|
| 305 | 204 | 0.01 | Q39RM7     | <i>Geobacter metallireducens</i>     | Glycosyltransferase                                                                                                                                                                                                                |
| 306 | 203 | 0.01 | Q39RQ5     | <i>Geobacter metallireducens</i>     | Chaperone protein ClpB                                                                                                                                                                                                             |
| 307 | 203 | 0.01 |            |                                      |                                                                                                                                                                                                                                    |
| 308 | 202 | 0.01 | A0A0B5B822 | <i>Geobacter pickeringii</i>         | Formate dehydrogenase                                                                                                                                                                                                              |
| 309 | 202 | 0.01 | Q39RI3     | <i>Geobacter metallireducens</i>     | Sensor histidine kinase, HAMP domain-containing, 2 heme-binding sites                                                                                                                                                              |
| 310 | 201 | 0.01 | A0A0D5N7M4 | <i>Geobacter sulfurreducens</i>      | Chemotaxis protein                                                                                                                                                                                                                 |
| 311 | 201 | 0.01 | A0A0D5N8K2 | <i>Geobacter sulfurreducens</i>      | RND transporter                                                                                                                                                                                                                    |
| 312 | 201 | 0.01 | A0A1G0MT57 | <i>Geobacteraceae bacterium</i>      | Uncharacterized protein                                                                                                                                                                                                            |
| 313 | 201 | 0.01 | A7I842     | <i>Methanoregula boonei</i>          | Beta-lactamase domain protein                                                                                                                                                                                                      |
| 314 | 201 | 0.01 | Q74AT0     | <i>Geobacter sulfurreducens</i>      | Lysine--tRNA ligase (EC 6.1.1.6) (Lysyl-tRNA synthetase) (LysRS)                                                                                                                                                                   |
| 315 | 201 | 0.01 | Q74B80     | <i>Geobacter sulfurreducens</i>      | Uncharacterized protein                                                                                                                                                                                                            |
| 316 | 201 | 0.01 |            |                                      |                                                                                                                                                                                                                                    |
| 317 | 200 | 0.01 | A0A0A8WN28 | <i>Geobacter sp. OR-1</i>            | Protein TraN                                                                                                                                                                                                                       |
| 318 | 200 | 0.01 | A0A0D5NB12 | <i>Geobacter sulfurreducens</i>      | Aldehyde dehydrogenase                                                                                                                                                                                                             |
| 319 | 200 | 0.01 | Q74BB8     | <i>Geobacter sulfurreducens</i>      | Metal-dependent phosphohydrolase                                                                                                                                                                                                   |
| 320 | 199 | 0.01 | A0A0B5BCH1 | <i>Geobacter pickeringii</i>         | Hydrogenase 2 large subunit (EC 1.12.99.6)                                                                                                                                                                                         |
| 321 | 199 | 0.01 | A7I7B5     | <i>Methanoregula boonei</i>          | DNA polymerase (EC 2.7.7.7)                                                                                                                                                                                                        |
| 322 | 199 | 0.01 | Q74GT3     | <i>Geobacter sulfurreducens</i>      | LL-diaminopimelate aminotransferase (DAP-AT) (DAP-aminotransferase) (LL-DAP-aminotransferase) (EC 2.6.1.83)                                                                                                                        |
| 323 | 199 | 0.01 | Q39UA2     | <i>Geobacter metallireducens</i>     | Adenylosuccinate lyase (ASL) (EC 4.3.2.2) (Adenylosuccinase)                                                                                                                                                                       |
| 324 | 198 | 0.01 | A1AN79     | <i>Pelobacter propionicus</i>        | Adenosylmethionine-8-amino-7-oxononanoate aminotransferase (EC 2.6.1.62) (7,8-diamino-pelargonic acid aminotransferase) (DAPA AT) (DAPA aminotransferase) (7,8-diaminononanoate synthase) (DANS) (Diaminopelargonic acid synthase) |
| 325 | 198 | 0.01 | A5GC25     | <i>Geobacter uraniireducens</i>      | Propionyl-CoA carboxylase (EC 6.4.1.3)                                                                                                                                                                                             |
| 326 | 198 | 0.01 | A7I766     | <i>Methanoregula boonei</i>          | Efflux transporter, putative, hydrophobe/amphiphile efflux-3 (HAE3) family                                                                                                                                                         |
| 327 | 198 | 0.01 | Q39Z79     | <i>Geobacter metallireducens</i>     | Twitching motility pilus retraction ATPase                                                                                                                                                                                         |
| 328 | 198 | 0.01 | Q74EP9     | <i>Geobacter sulfurreducens</i>      | DNA-binding ATPase Uup                                                                                                                                                                                                             |
| 329 | 198 | 0.01 |            |                                      |                                                                                                                                                                                                                                    |
| 330 | 196 | 0.01 | A0A0D5N2P4 | <i>Geobacter sulfurreducens</i>      | Uncharacterized protein                                                                                                                                                                                                            |
| 331 | 196 | 0.01 | A0A1T4LT91 | <i>Geobacter thiogenes</i>           | Putative transposase                                                                                                                                                                                                               |
| 332 | 196 | 0.01 | A5G8I3     | <i>Geobacter uraniireducens</i>      | Chaperone protein ClpB                                                                                                                                                                                                             |
| 333 | 196 | 0.01 | A7I5U5     | <i>Methanoregula boonei</i>          | 4Fe-4S ferredoxin, iron-sulfur binding domain protein                                                                                                                                                                              |
| 334 | 196 | 0.01 | Q3A5L6     | <i>Pelobacter carbinolicus</i>       | Uncharacterized protein                                                                                                                                                                                                            |
| 335 | 195 | 0.01 | A0A0B5B7G6 | <i>Geobacter pickeringii</i>         | Cytochrome C                                                                                                                                                                                                                       |
| 336 | 195 | 0.01 | A0A1F8XUV7 | <i>Deltaproteobacteria bacterium</i> | Uncharacterized protein                                                                                                                                                                                                            |

|     |     |      |            |                                  |                                                                                                                                                                                                                                                                                   |
|-----|-----|------|------------|----------------------------------|-----------------------------------------------------------------------------------------------------------------------------------------------------------------------------------------------------------------------------------------------------------------------------------|
| 337 | 195 | 0.01 | Q39ZI6     | <i>Geobacter metallireducens</i> | DNA helicase (EC 3.6.4.12)                                                                                                                                                                                                                                                        |
| 338 | 194 | 0.01 | A0A0B5BFT0 | <i>Geobacter pickeringii</i>     | Phosphoribosylformylglycinamide synthase subunit PurL (FGAM synthase) (EC 6.3.5.3) (Formylglycinamide ribonucleotide amidotransferase subunit II) (FGAR amidotransferase II) (FGAR-AT II) (Glutamine amidotransferase PurL) (Phosphoribosylformylglycinamide synthase subunit II) |
| 339 | 194 | 0.01 | A0A1T4RTR1 | <i>Geobacter thiogenes</i>       | Iron complex outermembrane receptor protein                                                                                                                                                                                                                                       |
| 340 | 194 | 0.01 | A5G3L3     | <i>Geobacter uraniireducens</i>  | Isocitrate dehydrogenase, NADP-dependent (EC 1.1.1.42)                                                                                                                                                                                                                            |
| 341 | 194 | 0.01 | A5GE75     | <i>Geobacter uraniireducens</i>  | Heavy metal translocating P-type ATPase                                                                                                                                                                                                                                           |
| 342 | 194 | 0.01 | B5EHY9     | <i>Geobacter bemidjensis</i>     | Uncharacterized protein                                                                                                                                                                                                                                                           |
| 343 | 194 | 0.01 | Q39UB0     | <i>Geobacter metallireducens</i> | Trans-isoprenyl diphosphate synthase                                                                                                                                                                                                                                              |
| 344 | 193 | 0.01 | A0A0A8WRD3 | <i>Geobacter sp.</i>             | Putative ABC transporter ATP-binding protein YkpA                                                                                                                                                                                                                                 |
| 345 | 193 | 0.01 | A0A0B5BB89 | <i>Geobacter pickeringii</i>     | Chromosome partition protein Smc                                                                                                                                                                                                                                                  |
| 346 | 193 | 0.01 | A0A0B5BFH3 | <i>Geobacter pickeringii</i>     | Polyribonucleotide nucleotidyltransferase (EC 2.7.7.8) (Polynucleotide phosphorylase) (PNPase)                                                                                                                                                                                    |
| 347 | 193 | 0.01 | Q39WR2     | <i>Geobacter metallireducens</i> | CRISPR-associated endonuclease Cas1 (EC 3.1.-.-)                                                                                                                                                                                                                                  |
| 348 | 193 | 0.01 | Q74AR7     | <i>Geobacter sulfurreducens</i>  | Membrane-associated metal-dependent phosphohydrolase, HDc domain-containing                                                                                                                                                                                                       |
| 349 | 192 | 0.01 | D4H4P2     | <i>Denitrovibrio acetiphilus</i> | Transposase IS3/IS911 family protein                                                                                                                                                                                                                                              |
| 350 | 192 | 0.01 | D8L7U2     | <i>Paramecium caudatum</i>       | Ymf65                                                                                                                                                                                                                                                                             |
| 351 | 192 | 0.01 | F4BZD0     | <i>Methanosaeta concilii</i>     | Transposase, putative                                                                                                                                                                                                                                                             |
| 352 | 192 | 0.01 | Q39VY8     | <i>Geobacter metallireducens</i> | Glutamine synthetase (EC 6.3.1.2)                                                                                                                                                                                                                                                 |
| 353 | 192 | 0.01 | Q74AF7     | <i>Geobacter sulfurreducens</i>  | Methyl viologen-reducing hydrogenase, large subunit                                                                                                                                                                                                                               |
| 354 | 191 | 0.01 | A0A0D5N5Y8 | <i>Geobacter sulfurreducens</i>  | Cell division protein FtsA                                                                                                                                                                                                                                                        |
| 355 | 191 | 0.01 | P61946     | <i>Geobacter sulfurreducens</i>  | S-adenosylmethionine synthase (AdoMet synthase) (EC 2.5.1.6) (MAT) (Methionine adenosyltransferase)                                                                                                                                                                               |
| 356 | 190 | 0.01 | A0A0B5B5Z5 | <i>Geobacter pickeringii</i>     | DNA polymerase III subunit beta (EC 2.7.7.7)                                                                                                                                                                                                                                      |
| 357 | 190 | 0.01 | A7I9M7     | <i>Methanoregula boonei</i>      | PilT protein domain protein                                                                                                                                                                                                                                                       |
| 358 | 190 | 0.01 | Q39VY0     | <i>Geobacter metallireducens</i> | Malate dehydrogenase (EC 1.1.1.37)                                                                                                                                                                                                                                                |
| 359 | 190 | 0.01 | Q748B3     | <i>Geobacter sulfurreducens</i>  | UDP-N-acetylglucosamine 1-carboxyvinyltransferase (EC 2.5.1.7) (Enoylpyruvate transferase) (UDP-N-acetylglucosamine enolpyruvyl transferase) (EPT)                                                                                                                                |
| 360 | 190 | 0.01 | Q39QB3     | <i>Geobacter metallireducens</i> | NADH dehydrogenase I, G subunit                                                                                                                                                                                                                                                   |
| 361 | 189 | 0.01 | A0A0B5BIX5 | <i>Geobacter pickeringii</i>     | DNA polymerase II                                                                                                                                                                                                                                                                 |
| 362 | 189 | 0.01 | A7I4Y9     | <i>Methanoregula boonei</i>      | DEAD/DEAH box helicase domain protein                                                                                                                                                                                                                                             |
| 363 | 189 | 0.01 | Q39W73     | <i>Geobacter metallireducens</i> | 2-isopropylmalate synthase (EC 2.3.3.13) (Alpha-IPM synthase) (Alpha-isopropylmalate synthase)                                                                                                                                                                                    |
| 364 | 189 | 0.01 | Q39ZL2     | <i>Geobacter metallireducens</i> | TrkA domain protein                                                                                                                                                                                                                                                               |



|     |     |      |            |                                   |                                                                                                                                                                                                                                                                                                                          |
|-----|-----|------|------------|-----------------------------------|--------------------------------------------------------------------------------------------------------------------------------------------------------------------------------------------------------------------------------------------------------------------------------------------------------------------------|
| 365 | 189 | 0.01 | Q74D18     | <i>Geobacter sulfurreducens</i>   | ABC transporter, ATP-binding protein                                                                                                                                                                                                                                                                                     |
| 366 | 189 | 0.01 | Q74E27     | <i>Geobacter sulfurreducens</i>   | Ribonuclease Y (RNase Y) (EC 3.1.-.-)                                                                                                                                                                                                                                                                                    |
| 367 | 189 | 0.01 | Q74FM7     | <i>Geobacter sulfurreducens</i>   | Glycine--tRNA ligase beta subunit (EC 6.1.1.14) (Glycyl-tRNA synthetase beta subunit) (GlyRS)                                                                                                                                                                                                                            |
| 368 | 189 | 0.01 | Q74H55     | <i>Geobacter sulfurreducens</i>   | Serine--tRNA ligase (EC 6.1.1.11) (Seryl-tRNA synthetase) (SerRS) (Seryl-tRNA(Ser/Sec) synthetase)                                                                                                                                                                                                                       |
| 369 | 189 | 0.01 |            |                                   |                                                                                                                                                                                                                                                                                                                          |
| 370 | 188 | 0.01 | A0A0B5BHJ9 | <i>Geobacter pickeringii</i>      | Chaperone protein HtpG (Heat shock protein HtpG) (High temperature protein G)                                                                                                                                                                                                                                            |
| 371 | 188 | 0.01 | A0A0D5N949 | <i>Geobacter sulfurreducens</i>   | Response regulator                                                                                                                                                                                                                                                                                                       |
| 372 | 188 | 0.01 | A0A1G0LYB2 | <i>Geobacteraceae bacterium</i>   | Uncharacterized protein                                                                                                                                                                                                                                                                                                  |
| 373 | 188 | 0.01 | B3EAB4     | <i>Geobacter lovleyi</i>          | Cytochrome c-552 (EC 1.7.2.2)                                                                                                                                                                                                                                                                                            |
| 374 | 188 | 0.01 | Q39VR4     | <i>Geobacter metallireducens</i>  | Bifunctional uridylyltransferase/uridylyl-removing enzyme (UTase/UR) (Bifunctional [protein-PII] modification enzyme) (Bifunctional nitrogen sensor protein) [Includes: [Protein-PII]-UMP uridylyl-removing enzyme (UR) (EC 3.1.4.-); [Protein-PII] uridylyltransferase (PII uridylyltransferase) (UTase) (EC 2.7.7.59)] |
| 375 | 188 | 0.01 | Q747G4     | <i>Geobacter sulfurreducens</i>   | (R)-methylmalonyl-CoA mutase, isobutyryl-CoA mutase-like catalytic subunit                                                                                                                                                                                                                                               |
| 376 | 188 | 0.01 | Q74D04     | <i>Geobacter sulfurreducens</i>   | Threonine--tRNA ligase (EC 6.1.1.3) (Threonyl-tRNA synthetase) (ThrRS)                                                                                                                                                                                                                                                   |
| 377 | 187 | 0.01 | A0A0B5BCP9 | <i>Geobacter pickeringii</i>      | Uncharacterized protein                                                                                                                                                                                                                                                                                                  |
| 378 | 187 | 0.01 | A0A0B5BE21 | <i>Geobacter pickeringii</i>      | Histidine kinase                                                                                                                                                                                                                                                                                                         |
| 379 | 187 | 0.01 | A0A0C1TQJ7 | <i>Geobacter soli</i>             | Uncharacterized protein                                                                                                                                                                                                                                                                                                  |
| 380 | 187 | 0.01 | D4H844     | <i>Denitrovibrio acetiphilus</i>  | Carbamoyl-phosphate synthase large chain (EC 6.3.5.5) (Carbamoyl-phosphate synthetase ammonia chain)                                                                                                                                                                                                                     |
| 381 | 186 | 0.01 | A0A0A8WNV3 | <i>Geobacter sp.</i>              | Uncharacterized protein                                                                                                                                                                                                                                                                                                  |
| 382 | 186 | 0.01 | A0A0B5BBZ4 | <i>Geobacter pickeringii</i>      | DNA polymerase I (EC 2.7.7.7)                                                                                                                                                                                                                                                                                            |
| 383 | 186 | 0.01 | A0A0B5BEL7 | <i>Geobacter pickeringii</i>      | Cytochrome C                                                                                                                                                                                                                                                                                                             |
| 384 | 186 | 0.01 | A0A1T4RHG8 | <i>Geobacter thiogenes</i>        | Iron complex outermembrane receptor protein                                                                                                                                                                                                                                                                              |
| 385 | 186 | 0.01 | A5GDX5     | <i>Geobacter uraniireducens</i>   | DNA gyrase subunit A (EC 5.99.1.3)                                                                                                                                                                                                                                                                                       |
| 386 | 186 | 0.01 |            |                                   |                                                                                                                                                                                                                                                                                                                          |
| 387 | 185 | 0.01 | A0A0B5BAI5 | <i>Geobacter pickeringii</i>      | Ketose-bisphosphate aldolase                                                                                                                                                                                                                                                                                             |
| 388 | 185 | 0.01 | A7I6L6     | <i>Methanoregula boonei</i>       | DNA topoisomerase 1 (EC 5.99.1.2) (DNA topoisomerase I)                                                                                                                                                                                                                                                                  |
| 389 | 185 | 0.01 | Q74FM8     | <i>Geobacter sulfurreducens</i>   | Glycine--tRNA ligase alpha subunit (EC 6.1.1.14) (Glycyl-tRNA synthetase alpha subunit) (GlyRS)                                                                                                                                                                                                                          |
| 390 | 185 | 0.01 |            |                                   |                                                                                                                                                                                                                                                                                                                          |
| 391 | 184 | 0.01 | A0A0D5N3S3 | <i>Geobacter sulfurreducens</i>   | Chemotaxis protein CheY                                                                                                                                                                                                                                                                                                  |
| 392 | 184 | 0.01 | A0A0W8FRW6 | <i>hydrocarbon metagenome</i>     | Uncharacterized protein                                                                                                                                                                                                                                                                                                  |
| 393 | 184 | 0.01 | H8MU17     | <i>Coralloccoccus coralloides</i> | Long-chain-fatty-acid--CoA ligase                                                                                                                                                                                                                                                                                        |

|     |     |      |            |                                     |                                                                                                         |
|-----|-----|------|------------|-------------------------------------|---------------------------------------------------------------------------------------------------------|
| 394 | 183 | 0.01 | A0A0B5BH19 | <i>Geobacter pickeringii</i>        | Uncharacterized protein                                                                                 |
| 395 | 182 | 0.01 | A0A0B5BB11 | <i>Geobacter pickeringii</i>        | Pyruvate carboxylase (EC 6.4.1.1)                                                                       |
| 396 | 182 | 0.01 | A0A1D3L5C3 | <i>Methanobacterium congolense</i>  | Uncharacterized protein                                                                                 |
| 397 | 182 | 0.01 | A71B61     | <i>Methanoregula boonei</i>         | ATP-dependent DNA helicase Hel308 (EC 3.6.4.12)                                                         |
| 398 | 182 | 0.01 | Q74GF2     | <i>Geobacter sulfurreducens</i>     | Metal-dependent phosphohydrolase, HDOD domain-containing                                                |
| 399 | 181 | 0.01 | A0A0B5BIH3 | <i>Geobacter pickeringii</i>        | Uncharacterized protein                                                                                 |
| 400 | 181 | 0.01 | A0A0D5NAV3 | <i>Geobacter sulfurreducens</i>     | Peptidase S41                                                                                           |
| 401 | 181 | 0.01 | A716S1     | <i>Methanoregula boonei</i>         | CoA-binding domain protein                                                                              |
| 402 | 181 | 0.01 | B9M149     | <i>Geobacter daltonii</i>           | Translation-regulating membrane GTPase TypA                                                             |
| 403 | 181 | 0.01 | Q39UH4     | <i>Geobacter metallireducens</i>    | Lon protease (EC 3.4.21.53) (ATP-dependent protease La)                                                 |
| 404 | 181 | 0.01 | A716H7     | <i>Methanoregula boonei</i>         | Methionine--tRNA ligase (EC 6.1.1.10) (Methionyl-tRNA synthetase) (MetRS)                               |
| 405 | 180 | 0.01 | A0A0B5BD12 | <i>Geobacter pickeringii</i>        | Inorganic pyrophosphatase                                                                               |
| 406 | 180 | 0.01 | A0A0B5BDG1 | <i>Geobacter pickeringii</i>        | tRNA uridine 5-carboxymethylaminomethyl modification enzyme MnmG (Glucose-inhibited division protein A) |
| 407 | 180 | 0.01 | A0A0B5BDP4 | <i>Geobacter pickeringii</i>        | Polya polymerase                                                                                        |
| 408 | 180 | 0.01 | A0A0B5BGV8 | <i>Geobacter pickeringii</i>        | Zinc protease                                                                                           |
| 409 | 180 | 0.01 | A0A1F9P4Q4 | <i>Desulfuromonadales bacterium</i> | Uncharacterized protein                                                                                 |
| 410 | 180 | 0.01 | A714K7     | <i>Methanoregula boonei</i>         | Lysine decarboxylase (EC 4.1.1.18)                                                                      |
| 411 | 180 | 0.01 | A71656     | <i>Methanoregula boonei</i>         | Elongation factor 1-alpha (EF-1-alpha) (Elongation factor Tu) (EF-Tu)                                   |
| 412 | 180 | 0.01 | Q39VA8     | <i>Geobacter metallireducens</i>    | Transcription termination/antitermination protein NusA                                                  |
| 413 | 180 | 0.01 | Q39XL2     | <i>Geobacter metallireducens</i>    | Phosphoenolpyruvate synthase (PEP synthase) (EC 2.7.9.2) (Pyruvate, water dikinase)                     |
| 414 | 179 | 0.01 | A0A0A8WV23 | <i>Geobacter sp.</i>                | Protein translocase subunit SecD                                                                        |
| 415 | 179 | 0.01 | A0A0B5BGX4 | <i>Geobacter pickeringii</i>        | Stage II sporulation protein E                                                                          |
| 416 | 179 | 0.01 | A71516     | <i>Methanoregula boonei</i>         | Coenzyme F420 hydrogenase (EC 1.12.98.1)                                                                |
| 417 | 179 | 0.01 | A71AF8     | <i>Methanoregula boonei</i>         | ABC-1 domain protein                                                                                    |
| 418 | 179 | 0.01 | B9M380     | <i>Geobacter daltonii</i>           | 4-hydroxy-tetrahydrodipicolinate synthase (HTPA synthase) (EC 4.3.3.7)                                  |
| 419 | 179 | 0.01 | Q74H61     | <i>Geobacter sulfurreducens</i>     | Heat-inducible transcription repressor HrcA                                                             |
| 420 | 179 | 0.01 | Q39Y18     | <i>Geobacter metallireducens</i>    | Transcription termination/antitermination protein NusG                                                  |
| 421 | 178 | 0.01 | A0A090I3J2 | <i>Methanobacterium formicicum</i>  | Uncharacterized protein                                                                                 |
| 422 | 178 | 0.01 | A0A0B5B8J3 | <i>Geobacter pickeringii</i>        | Rod shape-determining protein RodA                                                                      |
| 423 | 178 | 0.01 | A0A0B5BK21 | <i>Geobacter pickeringii</i>        | Inner membrane cytochrome H                                                                             |
| 424 | 178 | 0.01 | Q39QA3     | <i>Geobacter metallireducens</i>    | ATP synthase subunit a (ATP synthase FO sector subunit a) (F-ATPase subunit 6)                          |

|     |     |      |            |                                    |                                                                                                                                                                                                                                 |
|-----|-----|------|------------|------------------------------------|---------------------------------------------------------------------------------------------------------------------------------------------------------------------------------------------------------------------------------|
| 425 | 178 | 0.01 | N8P3X5     | <i>Acinetobacter bohemicus</i>     | Uncharacterized protein                                                                                                                                                                                                         |
| 426 | 178 | 0.01 | Q748A7     | <i>Geobacter sulfurreducens</i>    | Transcription termination factor Rho (EC 3.6.4.-) (ATP-dependent helicase Rho)                                                                                                                                                  |
| 427 | 177 | 0.01 | A0A090JUS9 | <i>Methanobacterium formicum</i>   | Putative secreted protein                                                                                                                                                                                                       |
| 428 | 177 | 0.01 |            |                                    |                                                                                                                                                                                                                                 |
| 429 | 176 | 0.01 | A0A0A8WQH6 | <i>Geobacter sp.</i>               | Uncharacterized protein                                                                                                                                                                                                         |
| 430 | 176 | 0.01 | A0A0B5B6N9 | <i>Geobacter pickeringii</i>       | Alanine--tRNA ligase (EC 6.1.1.7) (Alanyl-tRNA synthetase) (AlaRS)                                                                                                                                                              |
| 431 | 176 | 0.01 | A0A0D5N435 | <i>Geobacter sulfurreducens</i>    | Multidrug transporter                                                                                                                                                                                                           |
| 432 | 176 | 0.01 | A0A1G0MUH0 | <i>Geobacteraceae bacterium</i>    | Integrase                                                                                                                                                                                                                       |
| 433 | 176 | 0.01 | Q39W76     | <i>Geobacter metallireducens</i>   | Ketol-acid reductoisomerase (NADP(+)) (KARI) (EC 1.1.1.86) (Acetohydroxy-acid isomeroeductase) (AHIR) (Alpha-keto-beta-hydroxylacyl reductoisomerase) (Ketol-acid reductoisomerase type 1) (Ketol-acid reductoisomerase type I) |
| 434 | 176 | 0.01 | Q39TA6     | <i>Geobacter metallireducens</i>   | Inosine-5'-monophosphate dehydrogenase (IMP dehydrogenase) (IMPD) (IMPDH) (EC 1.1.1.205)                                                                                                                                        |
| 435 | 175 | 0.01 | A0A0A8WLBO | <i>Geobacter sp.</i>               | Protein TraH                                                                                                                                                                                                                    |
| 436 | 175 | 0.01 | A0A0B5BIW8 | <i>Geobacter pickeringii</i>       | Aminotransferase                                                                                                                                                                                                                |
| 437 | 175 | 0.01 | A7IB30     | <i>Methanoregula boonei</i>        | AAA family ATPase, CDC48 subfamily (EC 3.6.4.6)                                                                                                                                                                                 |
| 438 | 175 | 0.01 | D4H7W9     | <i>Denitrovibrio acetiphilus</i>   | Translation initiation factor IF-2                                                                                                                                                                                              |
| 439 | 175 | 0.01 | Q39U98     | <i>Geobacter metallireducens</i>   | Phosphoglycerate kinase (EC 2.7.2.3)                                                                                                                                                                                            |
| 440 | 175 | 0.01 | Q39PY9     | <i>Geobacter metallireducens</i>   | Histidine kinase (EC 2.7.13.3)                                                                                                                                                                                                  |
| 441 | 175 | 0.01 | Q39X31     | <i>Geobacter metallireducens</i>   | Protein translocase subunit SecA                                                                                                                                                                                                |
| 442 | 175 | 0.01 | A7I7S4     | <i>Methanoregula boonei</i>        | Alanine--tRNA ligase (EC 6.1.1.7) (Alanyl-tRNA synthetase) (AlaRS)                                                                                                                                                              |
| 443 | 175 | 0.01 |            |                                    |                                                                                                                                                                                                                                 |
| 444 | 174 | 0.01 | A0A0B5BJ17 | <i>Geobacter pickeringii</i>       | UvrABC system protein C (Protein UvrC) (Excinuclease ABC subunit C)                                                                                                                                                             |
| 445 | 174 | 0.01 | A0A0B5BK07 | <i>Geobacter pickeringii</i>       | Histidine kinase                                                                                                                                                                                                                |
| 446 | 174 | 0.01 | A0A1D3L0E4 | <i>Methanobacterium congolense</i> | WD40 domain-containing protein                                                                                                                                                                                                  |
| 447 | 174 | 0.01 | D0SHF8     | <i>Acinetobacter johnsonii</i>     | Uncharacterized protein                                                                                                                                                                                                         |
| 448 | 174 | 0.01 | Q74D63     | <i>Geobacter sulfurreducens</i>    | Uncharacterized protein                                                                                                                                                                                                         |
| 449 | 174 | 0.01 | Q747K3     | <i>Geobacter sulfurreducens</i>    | UvrABC system protein B (Protein UvrB) (Excinuclease ABC subunit B)                                                                                                                                                             |
| 450 | 173 | 0.01 | A0A0B5BDG8 | <i>Geobacter pickeringii</i>       | ABC transporter ATP-binding protein                                                                                                                                                                                             |
| 451 | 173 | 0.01 | A0A0B5BJV3 | <i>Geobacter pickeringii</i>       | ABC transporter substrate-binding protein                                                                                                                                                                                       |
| 452 | 173 | 0.01 | A0A0D5N6Q2 | <i>Geobacter sulfurreducens</i>    | Lactamase                                                                                                                                                                                                                       |
| 453 | 173 | 0.01 | P05489     | <i>Paramecium tetraurelia</i>      | Cytochrome c oxidase subunit 1 (EC 1.9.3.1) (Cytochrome c oxidase polypeptide I)                                                                                                                                                |
| 454 | 173 | 0.01 | L0HAI4     | <i>Methanoregula formicica</i>     | Formate dehydrogenase, alpha subunit, archaeal-type                                                                                                                                                                             |
| 455 | 173 | 0.01 | Q74B66     | <i>Geobacter sulfurreducens</i>    | TrfA family protein                                                                                                                                                                                                             |

|     |     |      |            |                                     |                                                                                                                                           |
|-----|-----|------|------------|-------------------------------------|-------------------------------------------------------------------------------------------------------------------------------------------|
| 456 | 173 | 0.01 |            |                                     |                                                                                                                                           |
| 457 | 172 | 0.01 | A0A0B5BGU8 | <i>Geobacter pickeringii</i>        | Chemotaxis protein                                                                                                                        |
| 458 | 172 | 0.01 | A0A0B5BGY7 | <i>Geobacter pickeringii</i>        | Phosphoglucosyltransferase                                                                                                                |
| 459 | 172 | 0.01 | A0A0D5N9G3 | <i>Geobacter sulfurreducens</i>     | Multidrug ABC transporter substrate-binding protein                                                                                       |
| 460 | 172 | 0.01 | A0A0Q7S8L4 | <i>Pelomonas sp.</i>                | Transposase                                                                                                                               |
| 461 | 172 | 0.01 | A7I4R1     | <i>Methanoregula boonei</i>         | Thermosome                                                                                                                                |
| 462 | 172 | 0.01 | A5GAC6     | <i>Geobacter uraniireducens</i>     | FMN-dependent NADH-azoreductase (EC 1.7.-.-) (Azo-dye reductase) (FMN-dependent NADH-azo compound oxidoreductase)                         |
| 463 | 172 | 0.01 | F4BY05     | <i>Methanosaeta concilii</i>        | Transposase, IS116/IS110/IS902 family                                                                                                     |
| 464 | 172 | 0.01 | Q748T0     | <i>Geobacter sulfurreducens</i>     | 5-methyltetrahydrofolate--homocysteine S-methyltransferase, cobalamin-dependent                                                           |
| 465 | 172 | 0.01 | Q74D56     | <i>Geobacter sulfurreducens</i>     | Aspartate--tRNA(Asp/Asn) ligase (EC 6.1.1.23) (Aspartyl-tRNA synthetase) (AspRS) (Non-discriminating aspartyl-tRNA synthetase) (ND-AspRS) |
| 466 | 172 | 0.01 |            |                                     |                                                                                                                                           |
| 467 | 172 | 0.01 |            |                                     |                                                                                                                                           |
| 468 | 171 | 0.01 | A0A0B5BHF0 | <i>Geobacter pickeringii</i>        | 2-oxoglutarate dehydrogenase (EC 1.2.4.2)                                                                                                 |
| 469 | 171 | 0.01 | B3EAZ5     | <i>Geobacter lovleyi</i>            | TraG family protein                                                                                                                       |
| 470 | 171 | 0.01 | F4GG80     | <i>Alicyclophilus denitrificans</i> | Transposase IS4 family protein                                                                                                            |
| 471 | 171 | 0.01 | Q74A32     | <i>Geobacter sulfurreducens</i>     | PppGpp 5'-phosphohydrolase and exopolyphosphatase, HD domain-containing                                                                   |
| 472 | 170 | 0.01 | A0A0A8WQR9 | <i>Geobacter sp.</i>                | Helix-turn-helix domain protein                                                                                                           |
| 473 | 170 | 0.01 | A0A0D5N645 | <i>Geobacter sulfurreducens</i>     | Penicillin-binding protein                                                                                                                |
| 474 | 170 | 0.01 | A0A1G1FB69 | <i>Nitrospirae bacterium</i>        | Uncharacterized protein                                                                                                                   |
| 475 | 170 | 0.01 | B3EA94     | <i>Geobacter lovleyi</i>            | Uncharacterized protein                                                                                                                   |
| 476 | 170 | 0.01 | Q746T2     | <i>Geobacter sulfurreducens</i>     | NADH-quinone oxidoreductase subunit H 2 (EC 1.6.5.11) (NADH dehydrogenase I subunit H 2) (NDH-1 subunit H 2)                              |
| 477 | 170 | 0.01 | Q39VU9     | <i>Geobacter metallireducens</i>    | Polyprenyl-phospho-glycoside--protein O-glycosyltransferase DUF2723 membrane protein, putative                                            |
| 478 | 170 | 0.01 | Q74BT7     | <i>Geobacter sulfurreducens</i>     | Sensor histidine kinase cyclic nucleotide phosphodiesterase, GAF, GAF and HD-GYP-related domain-containing                                |
| 479 | 170 | 0.01 | Q748Y3     | <i>Geobacter sulfurreducens</i>     | 50S ribosomal protein L1                                                                                                                  |
| 480 | 169 | 0.01 | A0A1B1ICB8 | <i>Prevotella scopos</i>            | Uncharacterized protein                                                                                                                   |
| 481 | 169 | 0.01 | B9M5J8     | <i>Geobacter daltonii</i>           | CRISPR-associated protein Csd1                                                                                                            |
| 482 | 169 | 0.01 | Q39QK5     | <i>Geobacter metallireducens</i>    | Uncharacterized protein                                                                                                                   |
| 483 | 169 | 0.01 | Q39RM2     | <i>Geobacter metallireducens</i>    | Glycosyltransferase                                                                                                                       |
| 484 | 169 | 0.01 | Q749D7     | <i>Geobacter sulfurreducens</i>     | Nitrogenase molybdenum-iron cofactor biosynthesis protein NifEN                                                                           |
| 485 | 169 | 0.01 | A7I6P0     | <i>Methanoregula boonei</i>         | Threonine--tRNA ligase (EC 6.1.1.3) (Threonyl-tRNA synthetase) (ThrRS)                                                                    |

|     |     |      |            |                                         |                                                                     |
|-----|-----|------|------------|-----------------------------------------|---------------------------------------------------------------------|
| 486 | 168 | 0.01 | A0A0B5B792 | <i>Geobacter pickeringii</i>            | Flagellar biosynthesis protein FlhF                                 |
| 487 | 168 | 0.01 | A0A0B5BBX6 | <i>Geobacter pickeringii</i>            | Ribonuclease E (RNase E) (EC 3.1.26.12)                             |
| 488 | 168 | 0.01 | A0A0B5BHF1 | <i>Geobacter pickeringii</i>            | Antibiotic ABC transporter ATP-binding protein                      |
| 489 | 168 | 0.01 | A0A0D5N6L1 | <i>Geobacter sulfurreducens</i>         | Histidine kinase                                                    |
| 490 | 168 | 0.01 | Q74D76     | <i>Geobacter sulfurreducens</i>         | Histidine kinase (EC 2.7.13.3)                                      |
| 491 | 167 | 0.01 | A0A0D5N5H4 | <i>Geobacter sulfurreducens</i>         | Cell division protein FtsK                                          |
| 492 | 167 | 0.01 | A0A1F9PKR5 | <i>Desulfuromonadales<br/>bacterium</i> | Uncharacterized protein                                             |
| 493 | 167 | 0.01 | B9M7P3     | <i>Geobacter daltonii</i>               | UvrABC system protein A (UvrA protein) (Excinuclease ABC subunit A) |
| 494 | 167 | 0.01 | Q39ZF6     | <i>Geobacter metallireducens</i>        | Carbamoyltransferase HypF (EC 2.1.3.-)                              |
| 495 | 167 | 0.01 | Q746S9     | <i>Geobacter sulfurreducens</i>         | NADH-quinone oxidoreductase (EC 1.6.5.11)                           |
| 496 | 167 | 0.01 | U6EA67     | <i>Methanobacterium sp.</i>             | Uncharacterized protein                                             |
| 497 | 166 | 0.01 | A0A0B5B7W4 | <i>Geobacter pickeringii</i>            | Transporter                                                         |
| 498 | 166 | 0.01 | A0A0B5BBV1 | <i>Geobacter pickeringii</i>            | Cytochrome C                                                        |
| 499 | 166 | 0.01 | A0A0D5NDV9 | <i>Geobacter sulfurreducens</i>         | HD family phosphohydrolase                                          |
| 500 | 166 | 0.01 | C9MTU8     | <i>Prevotella veroralis</i>             | Initiator RepB protein                                              |

**Table S6c.** Functional overview of M4P community (top 500 rank only).

| Rank | Count | Abundance | ID         | Organism                              | Protein Names                                    |
|------|-------|-----------|------------|---------------------------------------|--------------------------------------------------|
| 1    | 4631  | 0.17      | Q8VQM8     | <i>Prevotella intermedia</i>          | Mobilization protein                             |
| 2    | 3649  | 0.14      | N8ZVC9     | <i>Acinetobacter gernerii</i>         | Uncharacterized protein                          |
| 3    | 2964  | 0.11      | F0FB90     | <i>Prevotella multiformis</i>         | Initiator RepB protein (Fragment)                |
| 4    | 2821  | 0.11      | A0A0A2LWZ9 | <i>Flavobacterium suncheonense</i>    | Transposase                                      |
| 5    | 2600  | 0.10      | N8ZNX3     | <i>Acinetobacter gernerii</i>         | Uncharacterized protein                          |
| 6    | 2509  | 0.09      | A0A0U1CQ28 | <i>Chlamydia trachomatis</i>          | Replication protein                              |
| 7    | 2497  | 0.09      | F0FB88     | <i>Prevotella multiformis</i>         | Putative plasmid recombination enzyme            |
| 8    | 2288  | 0.09      | A0A0R3QEE4 | <i>Brugia timori</i>                  | Uncharacterized protein                          |
| 9    | 2060  | 0.08      | A0A0U1CQ01 | <i>Chlamydia trachomatis</i>          | Uncharacterised protein                          |
| 10   | 1878  | 0.07      |            |                                       |                                                  |
| 11   | 1862  | 0.07      | Q8VQM9     | <i>Prevotella intermedia</i>          | Replication protein                              |
| 12   | 1646  | 0.06      | A0A077XLW5 | <i>Sphinx1.76-related DNA</i>         | Replication protein                              |
| 13   | 1478  | 0.06      | A0A0E9G9S8 | <i>Chlamydia trachomatis</i>          | Uncharacterised protein                          |
| 14   | 1422  | 0.05      | A0A077XNB6 | <i>Sphinx1.76-related DNA</i>         | Replication protein                              |
| 15   | 1400  | 0.05      | A0A0Q7S8L4 | <i>Pelomonas sp.</i>                  | Transposase                                      |
| 16   | 1364  | 0.05      |            |                                       |                                                  |
| 17   | 1359  | 0.05      | A0A1B1ICB8 | <i>Prevotella scopos</i>              | Uncharacterized protein                          |
| 18   | 1322  | 0.05      | C9MTU8     | <i>Prevotella veroralis</i>           | Initiator RepB protein                           |
| 19   | 1322  | 0.05      | F4GG80     | <i>Alicyclophilus denitrificans</i>   | Transposase IS4 family protein                   |
| 20   | 1154  | 0.04      | A0A1Q3RZJ5 | <i>Flavobacterium sp.</i>             | Uncharacterized protein                          |
| 21   | 1123  | 0.04      | A0A023UP33 | <i>Magnusiomyces ingens</i>           | Uncharacterized protein (Fragment)               |
| 22   | 1109  | 0.04      | A0A1Q3SCF5 | <i>Flavobacterium sp.</i>             | Uncharacterized protein                          |
| 23   | 1068  | 0.04      | N8YFI4     | <i>Acinetobacter gernerii</i>         | Uncharacterized protein                          |
| 24   | 1004  | 0.04      | A0A1Q3S858 | <i>Flavobacterium sp.</i>             | Uncharacterized protein                          |
| 25   | 917   | 0.03      | A0A1E4A455 | <i>Chryseobacterium sp.</i>           | Cell surface protein SprA                        |
| 26   | 903   | 0.03      | A0A1Q3RWC6 | <i>Flavobacterium sp.</i>             | Uncharacterized protein                          |
| 27   | 864   | 0.03      | A0A1Q3M6H6 | <i>Bacteroidales bacterium</i>        | CRISPR-associated endonuclease Cas9 (EC 3.1.-.-) |
| 28   | 847   | 0.03      | A0A023UP27 | <i>Magnusiomyces ingens</i>           | Uncharacterized protein                          |
| 29   | 847   | 0.03      | A0A0Q7S7D9 | <i>Pelomonas sp.</i>                  | Uncharacterized protein                          |
| 30   | 847   | 0.03      | A0A1L9GVN0 | <i>Cand. Micrarchaeum acidiphilum</i> | Uncharacterized protein                          |
| 31   | 809   | 0.03      | G9FB24     | <i>uncultured bacterium</i>           | IS21 family transposition protein                |
| 32   | 792   | 0.03      | A0A1E3ZQ34 | <i>Chryseobacterium sp.</i>           | Cell envelope biogenesis protein OmpA            |
| 33   | 764   | 0.03      | A0A0D2WNJ4 | <i>Capsaspora owczarzaki</i>          | Paramyosin                                       |

|    |     |      |             |                                       |                                                                                                                                          |
|----|-----|------|-------------|---------------------------------------|------------------------------------------------------------------------------------------------------------------------------------------|
| 34 | 760 | 0.03 | A0A0T5YH86  | <i>Acinetobacter baumannii</i>        | Mobilization protein A                                                                                                                   |
| 35 | 748 | 0.03 | E4T3F9      | <i>Paludibacter propionicipigenes</i> | Glutamate synthase (NADH) large subunit (EC 1.4.1.14) (EC 1.4.7.1)                                                                       |
| 36 | 737 | 0.03 | A0A0D8Y6E2  | <i>Dictyocaulus viviparus</i>         | Uncharacterized protein                                                                                                                  |
| 37 | 722 | 0.03 | A0A1Q3S9F2  | <i>Flavobacterium sp.</i>             | Uncharacterized protein                                                                                                                  |
| 38 | 698 | 0.03 | A0A1Q3S0Y5  | <i>Flavobacterium sp.</i>             | Uncharacterized protein                                                                                                                  |
| 39 | 695 | 0.03 | A0A0Q7RZB1  | <i>Pelomonas sp. Root1444</i>         | Uncharacterized protein                                                                                                                  |
| 40 | 637 | 0.02 | A0A0M8MCD5  | <i>Flavobacterium akiainvivens</i>    | Integrase                                                                                                                                |
| 41 | 622 | 0.02 | A0A1J5AN19  | <i>Bacteroidetes bacterium</i>        | IS110 family transposase                                                                                                                 |
| 42 | 615 | 0.02 | A0A023UMS7  | <i>Magnusiomyces ingens</i>           | NADH-ubiquinone oxidoreductase chain 5 (EC 1.6.5.3)                                                                                      |
| 43 | 599 | 0.02 | A0A016UJCK1 | <i>Ancylostoma ceylanicum</i>         | Uncharacterized protein                                                                                                                  |
| 44 | 582 | 0.02 | A0A1E4A9F0  | <i>Chryseobacterium sp.</i>           | Uncharacterized protein                                                                                                                  |
| 45 | 572 | 0.02 | A0A023UMT3  | <i>Magnusiomyces ingens</i>           | Uncharacterized protein (Fragment)                                                                                                       |
| 46 | 569 | 0.02 | A0A0R3R918  | <i>Brugia timori</i>                  | Uncharacterized protein                                                                                                                  |
| 47 | 568 | 0.02 | A0A1K2IH81  | <i>Chryseobacterium limigenitum</i>   | Uncharacterized protein                                                                                                                  |
| 48 | 530 | 0.02 | A0A1E4ARQ1  | <i>Chryseobacterium sp.</i>           | Uncharacterized protein                                                                                                                  |
| 49 | 523 | 0.02 | A0A1T5HUH3  | <i>Alkalitalea saponilacus</i>        | Uncharacterized protein                                                                                                                  |
| 50 | 519 | 0.02 | G0IXG6      | <i>Cyclobacterium marinum</i>         | Transposase IS116/IS110/IS902 family protein                                                                                             |
| 51 | 515 | 0.02 | A0A0Q6WNI0  | <i>Pelomonas sp.</i>                  | DNA-directed RNA polymerase subunit beta' (RNAP subunit beta') (EC 2.7.7.6) (RNA polymerase subunit beta') (Transcriptase subunit beta') |
| 52 | 511 | 0.02 | A0A1E4AD77  | <i>Chryseobacterium sp.</i>           | Uncharacterized protein                                                                                                                  |
| 53 | 511 | 0.02 | A0A1Q3S812  | <i>Flavobacterium sp.</i>             | Uncharacterized protein                                                                                                                  |
| 54 | 503 | 0.02 | E4T8J6      | <i>Paludibacter propionicipigenes</i> | Cell surface receptor IPT/TIG domain protein                                                                                             |
| 55 | 501 | 0.02 | A0A077XLZ7  | <i>Sphinx1.76-related DNA</i>         | Replication protein                                                                                                                      |
| 56 | 494 | 0.02 | A0A127MR59  | <i>Pseudomonas citronellolis</i>      | Uncharacterized protein                                                                                                                  |
| 57 | 494 | 0.02 | V6RWN6      | <i>Flavobacterium cauense</i>         | Uncharacterized protein                                                                                                                  |
| 58 | 491 | 0.02 | A0A1M3DNL6  | <i>Bacteroidales bacterium</i>        | IS4 family transposase                                                                                                                   |
| 59 | 481 | 0.02 | A0A1Q3RUL1  | <i>Flavobacterium sp.</i>             | Uncharacterized protein                                                                                                                  |
| 60 | 481 | 0.02 | F3ZQL8      | <i>Bacteroides coprosuis</i>          | Transposase IS4 family protein                                                                                                           |
| 61 | 472 | 0.02 | A0A1Q3S0Z6  | <i>Flavobacterium sp.</i>             | Uncharacterized protein                                                                                                                  |
| 62 | 472 | 0.02 | E4T5D1      | <i>Paludibacter propionicipigenes</i> | Methionine--tRNA ligase (EC 6.1.1.10) (Methionyl-tRNA synthetase) (MetRS)                                                                |
| 63 | 466 | 0.02 |             |                                       |                                                                                                                                          |
| 64 | 459 | 0.02 | A0A174XH04  | <i>Bacteroides caccae</i>             | Addiction module toxin, Txe/YoeB family                                                                                                  |
| 65 | 451 | 0.02 |             |                                       |                                                                                                                                          |
| 66 | 450 | 0.02 | A0A180EWA0  | <i>Bacteroidales bacterium</i>        | Replication protein                                                                                                                      |
| 67 | 445 | 0.02 | A0A167ZLW1  | <i>Flavobacterium fryxellicola</i>    | Uncharacterized protein                                                                                                                  |
| 68 | 442 | 0.02 | A0A1Q3S042  | <i>Flavobacterium sp.</i>             | Peptidase C25                                                                                                                            |

|     |     |      |            |                                                |                                                                                                                   |
|-----|-----|------|------------|------------------------------------------------|-------------------------------------------------------------------------------------------------------------------|
| 69  | 439 | 0.02 | A0A0K3A869 | <i>Xanthomonas translucens</i> pv. <i>poae</i> | Riboflavin biosynthesis protein (EC 2.7.7.2)                                                                      |
| 70  | 438 | 0.02 | A0A1Q3S6M2 | <i>Flavobacterium</i> sp.                      | Uncharacterized protein                                                                                           |
| 71  | 436 | 0.02 | G9FB23     | <i>uncultured bacterium</i>                    | IS21 family transposition protein                                                                                 |
| 72  | 434 | 0.02 |            |                                                |                                                                                                                   |
| 73  | 432 | 0.02 | A0A1E4A330 | <i>Chryseobacterium</i> sp.                    | Acriflavin resistance protein                                                                                     |
| 74  | 431 | 0.02 | A0A1Q3RUG1 | <i>Flavobacterium</i> sp.                      | Uncharacterized protein                                                                                           |
| 75  | 430 | 0.02 | A0A1E3ZXL4 | <i>Chryseobacterium</i> sp.                    | Uncharacterized protein                                                                                           |
| 76  | 430 | 0.02 | A0A1Q3RVF6 | <i>Flavobacterium</i> sp.                      | Multidrug transporter AcrB                                                                                        |
| 77  | 429 | 0.02 | F0FB86     | <i>Prevotella multiformis</i> DSM 16608        | Uncharacterized protein                                                                                           |
| 78  | 428 | 0.02 | A0A060RAF8 | <i>Mucinivorans hirudinis</i>                  | Mobile element protein                                                                                            |
| 79  | 425 | 0.02 | A0A1E4ADX1 | <i>Chryseobacterium</i> sp.                    | Uncharacterized protein                                                                                           |
| 80  | 424 | 0.02 | A0A177LQD3 | <i>Chryseobacterium</i> sp. J200               | Uncharacterized protein                                                                                           |
| 81  | 423 | 0.02 | A0A1E4AFR9 | <i>Chryseobacterium</i> sp.                    | Uncharacterized protein                                                                                           |
| 82  | 420 | 0.02 | A0A1Q3RUG7 | <i>Flavobacterium</i> sp.                      | Uncharacterized protein                                                                                           |
| 83  | 416 | 0.02 | A0A1Q3RVI5 | <i>Flavobacterium</i> sp.                      | Uncharacterized protein                                                                                           |
| 84  | 415 | 0.02 | A0A1E4ABZ6 | <i>Chryseobacterium</i> sp.                    | Multifunctional fusion protein [Includes: Protein translocase subunit SecD; Protein-export membrane protein SecF] |
| 85  | 414 | 0.02 | A0A1E4AA02 | <i>Chryseobacterium</i> sp.                    | TonB-dependent receptor                                                                                           |
| 86  | 413 | 0.02 | A0A0K0WV14 | <i>Litoditis</i> aff. <i>marina</i> PmIII      | NADH dehydrogenase subunit 5                                                                                      |
| 87  | 412 | 0.02 |            |                                                |                                                                                                                   |
| 88  | 411 | 0.02 | A0A1Q3S3Z3 | <i>Flavobacterium</i> sp.                      | DNA methylase                                                                                                     |
| 89  | 407 | 0.02 | A0A1Q3S3S6 | <i>Flavobacterium</i> sp.                      | Uncharacterized protein                                                                                           |
| 90  | 406 | 0.02 | A0A0Q7SV37 | <i>Pelomonas</i> sp. Root1444                  | Glutamate synthase                                                                                                |
| 91  | 402 | 0.02 | A0A0Q8GZB4 | <i>Pelomonas</i> sp. Root662                   | UvrABC system protein A                                                                                           |
| 92  | 402 | 0.02 | A0A1Q3S6H8 | <i>Flavobacterium</i> sp.                      | Uncharacterized protein                                                                                           |
| 93  | 399 | 0.01 |            |                                                |                                                                                                                   |
| 94  | 397 | 0.01 |            |                                                |                                                                                                                   |
| 95  | 394 | 0.01 | A0A1Q3S3X4 | <i>Flavobacterium</i> sp.                      | Uncharacterized protein                                                                                           |
| 96  | 394 | 0.01 | N8YF58     | <i>Acinetobacter gernerii</i>                  | Uncharacterized protein                                                                                           |
| 97  | 393 | 0.01 | A0A1Q3M3N2 | <i>Bacteroidales bacterium</i>                 | Uncharacterized protein (Fragment)                                                                                |
| 98  | 392 | 0.01 | A0A1E4AD73 | <i>Chryseobacterium</i> sp.                    | Outer membrane protein assembly factor BamA                                                                       |
| 99  | 390 | 0.01 | A0A023UP41 | <i>Magnusiomyces ingens</i>                    | Cytochrome c oxidase subunit 1 (EC 1.9.3.1)                                                                       |
| 100 | 387 | 0.01 | A0A1Q3RUH2 | <i>Flavobacterium</i> sp.                      | Uncharacterized protein                                                                                           |
| 101 | 385 | 0.01 | A0A127MVT9 | <i>Pseudomonas citronellolis</i>               | Uncharacterized protein                                                                                           |



|     |     |      |            |                                       |                                                 |
|-----|-----|------|------------|---------------------------------------|-------------------------------------------------|
| 102 | 385 | 0.01 | A0A177LRY5 | <i>Chryseobacterium sp.</i>           | Uncharacterized protein                         |
| 103 | 379 | 0.01 | K9L3G6     | <i>Magnusiomyces magnusii</i>         | Cytochrome b                                    |
| 104 | 377 | 0.01 | I9R3U4     | <i>Bacteroides cellulosilyticus</i>   | Uncharacterized protein                         |
| 105 | 375 | 0.01 | A0A1B2YV26 | <i>uncultured bacterium</i>           | Conserved repeat domain-containing protein      |
| 106 | 373 | 0.01 | A0A023UPJ4 | <i>Magnusiomyces ingens</i>           | Uncharacterized protein (Fragment)              |
| 107 | 373 | 0.01 | A0A1Q3S919 | <i>Flavobacterium sp.</i>             | SusC/RagA family protein                        |
| 108 | 373 | 0.01 |            |                                       |                                                 |
| 109 | 372 | 0.01 | A0A023UM92 | <i>Magnusiomyces ingens</i>           | Uncharacterized protein                         |
| 110 | 370 | 0.01 | A0A140JXE2 | <i>Escherichia coli</i>               | Uncharacterized protein                         |
| 111 | 370 | 0.01 | A0A1J5HM76 | <i>Porphyromonadaceae bacterium</i>   | Multidrug transporter AcrB                      |
| 112 | 369 | 0.01 | A0A023UM78 | <i>Magnusiomyces ingens</i>           | NADH dehydrogenase subunit 2 (EC 1.6.5.3)       |
| 113 | 369 | 0.01 | A0A1Q3RYV8 | <i>Flavobacterium sp.</i>             | 2-oxoglutarate dehydrogenase E1 component       |
| 114 | 368 | 0.01 | A0A1E3ZQQ1 | <i>Chryseobacterium sp.</i>           | Uncharacterized protein                         |
| 115 | 366 | 0.01 | Q45FH5     | <i>Adineta vaga</i>                   | Transposase                                     |
| 116 | 366 | 0.01 | W2UCH0     | <i>Gammaaproteobacteria bacterium</i> | Uncharacterized protein                         |
| 117 | 362 | 0.01 | A0A1Q3S7F1 | <i>Flavobacterium sp.</i>             | Beta-N-acetylglucosaminidase                    |
| 118 | 362 | 0.01 | A0A1Q3S9B3 | <i>Flavobacterium sp.</i>             | Uncharacterized protein                         |
| 119 | 360 | 0.01 | A0A154DNE7 | <i>Acinetobacter baumannii</i>        | mRNA endoribonuclease LS (EC 3.1.-.-)           |
| 120 | 360 | 0.01 | A0A1E4A6N2 | <i>Chryseobacterium sp.</i>           | Alkaline phosphatase                            |
| 121 | 359 | 0.01 | A0A0A2M931 | <i>Flavobacterium suncheonsens</i>    | Uncharacterized protein (Fragment)              |
| 122 | 358 | 0.01 | A0A1Q3S993 | <i>Flavobacterium sp.</i>             | Uncharacterized protein                         |
| 123 | 356 | 0.01 | A0A1E4AC15 | <i>Chryseobacterium sp.</i>           | Uncharacterized protein                         |
| 124 | 353 | 0.01 | A0A1E4AHR4 | <i>Chryseobacterium sp.</i>           | Uncharacterized protein                         |
| 125 | 352 | 0.01 | A0A1E4A2B9 | <i>Chryseobacterium sp.</i>           | Quinol:cytochrome C oxidoreductase              |
| 126 | 351 | 0.01 | A1W6Q0     | <i>Acidovorax sp.</i>                 | Integrase, catalytic region                     |
| 127 | 350 | 0.01 | A0A1E3ZYA8 | <i>Chryseobacterium sp.</i>           | Uncharacterized protein                         |
| 128 | 348 | 0.01 | A0A1E4A8D6 | <i>Chryseobacterium sp.</i>           | Metallophosphoesterase                          |
| 129 | 346 | 0.01 | A0A1E4A2A9 | <i>Chryseobacterium sp.</i>           | Organic solvent tolerance protein OstA          |
| 130 | 343 | 0.01 | A0A1Q3S1D7 | <i>Flavobacterium sp.</i>             | TonB-dependent receptor                         |
| 131 | 343 | 0.01 | R7Y1V2     | <i>Nocardioides sp. CF8</i>           | Uncharacterized protein                         |
| 132 | 342 | 0.01 | A0A1E4AC98 | <i>Chryseobacterium sp.</i>           | Probable potassium transport system protein kup |
| 133 | 341 | 0.01 | A0A1Q3S8X4 | <i>Flavobacterium sp.</i>             | Cation transporter                              |
| 134 | 340 | 0.01 | A0A0Q6WK82 | <i>Pelomonas sp.</i>                  | RND transporter                                 |
| 135 | 339 | 0.01 | A0A1E4AAS0 | <i>Chryseobacterium sp.</i>           | Uncharacterized protein                         |

|     |     |      |            |                                   |                                                                                                                                                                     |
|-----|-----|------|------------|-----------------------------------|---------------------------------------------------------------------------------------------------------------------------------------------------------------------|
| 136 | 338 | 0.01 | A0A1Q3RWE1 | <i>Flavobacterium sp.</i>         | Penicillin-binding protein                                                                                                                                          |
| 137 | 337 | 0.01 | A0A0Q7SRI3 | <i>Pelomonas sp.</i>              | Efflux pump membrane transporter                                                                                                                                    |
| 138 | 337 | 0.01 | A0A1Q3S143 | <i>Flavobacterium sp.</i>         | Glycine dehydrogenase (decarboxylating) (EC 1.4.4.2) (Glycine cleavage system P-protein) (Glycine decarboxylase) (Glycine dehydrogenase (aminomethyl-transferring)) |
| 139 | 336 | 0.01 | A0A1Q3RVH4 | <i>Flavobacterium sp.</i>         | Metallophosphoesterase                                                                                                                                              |
| 140 | 335 | 0.01 | A0A015R892 | <i>Bacteroides fragilis</i>       | Plasmid encoded toxin Txe family protein                                                                                                                            |
| 141 | 335 | 0.01 | A0A0Q7SJ43 | <i>Pelomonas sp.</i>              | Transposase                                                                                                                                                         |
| 142 | 333 | 0.01 | A0A1Q3S2G4 | <i>Flavobacterium sp.</i>         | Protein translocase subunit SecA                                                                                                                                    |
| 143 | 333 | 0.01 | D0SHF8     | <i>Acinetobacter johnsonii</i>    | Uncharacterized protein                                                                                                                                             |
| 144 | 329 | 0.01 | A0A0Q7SS31 | <i>Pelomonas sp.</i>              | Transposase                                                                                                                                                         |
| 145 | 328 | 0.01 | A0A1Q3RXG1 | <i>Flavobacterium sp.</i>         | Uncharacterized protein                                                                                                                                             |
| 146 | 327 | 0.01 | A0A111TKT3 | <i>Pseudomonas citronellolis</i>  | Uncharacterized protein                                                                                                                                             |
| 147 | 327 | 0.01 | E9I741     | <i>Daphnia pulex</i>              | Putative uncharacterized protein (Fragment)                                                                                                                         |
| 148 | 325 | 0.01 | A0A077XLZ0 | <i>Sphinx1.76-related DNA</i>     | Replication protein                                                                                                                                                 |
| 149 | 325 | 0.01 | A0A0R0LGW3 | <i>Ferrofum sp.</i>               | ATP-dependent RNA helicase RhlE (EC 3.6.4.13)                                                                                                                       |
| 150 | 325 | 0.01 | A0A1E4ACQ6 | <i>Chryseobacterium sp.</i>       | LmbE family protein                                                                                                                                                 |
| 151 | 324 | 0.01 | A0A1M3DC14 | <i>Bacteroidales bacterium</i>    | Formate C-acetyltransferase                                                                                                                                         |
| 152 | 324 | 0.01 | A0A1Q3S2W6 | <i>Flavobacterium sp.</i>         | Cytochrome C biogenesis protein                                                                                                                                     |
| 153 | 320 | 0.01 | E4T072     | <i>Paludibacter propionigenes</i> | Pyruvate, phosphate dikinase (EC 2.7.9.1)                                                                                                                           |
| 154 | 319 | 0.01 | A0A1E4A9M1 | <i>Chryseobacterium sp.</i>       | Cation transporter                                                                                                                                                  |
| 155 | 319 | 0.01 | A0A1Q3RYP3 | <i>Flavobacterium sp.</i>         | DNA-directed DNA polymerase (EC 2.7.7.7)                                                                                                                            |
| 156 | 318 | 0.01 | A0A1Q3S3T4 | <i>Flavobacterium sp.</i>         | TonB-dependent receptor                                                                                                                                             |
| 157 | 317 | 0.01 | A0A177LPI8 | <i>Chryseobacterium sp.</i>       | Uncharacterized protein                                                                                                                                             |
| 158 | 315 | 0.01 | A0A1Q3SAL9 | <i>Flavobacterium sp.</i>         | Peptidase M3                                                                                                                                                        |
| 159 | 314 | 0.01 | A0A1E4AHQ8 | <i>Chryseobacterium sp.</i>       | TonB-dependent receptor                                                                                                                                             |
| 160 | 314 | 0.01 | A0A1Q3SAB4 | <i>Flavobacterium sp.</i>         | TonB-dependent receptor                                                                                                                                             |
| 161 | 314 | 0.01 |            |                                   |                                                                                                                                                                     |
| 162 | 313 | 0.01 | A0A0Q7SDJ3 | <i>Pelomonas sp.</i>              | Iron permease                                                                                                                                                       |
| 163 | 313 | 0.01 | A0A1E4AFY9 | <i>Chryseobacterium sp.</i>       | Uncharacterized protein                                                                                                                                             |
| 164 | 312 | 0.01 | A0A1E4A7M8 | <i>Chryseobacterium sp.</i>       | Uncharacterized protein                                                                                                                                             |
| 165 | 312 | 0.01 | A0A1Q3SAM2 | <i>Flavobacterium sp.</i>         | Uncharacterized protein                                                                                                                                             |
| 166 | 311 | 0.01 | F5UKT4     | <i>Microcoleus vaginatus</i>      | Polymorphic outer membrane protein                                                                                                                                  |
| 167 | 310 | 0.01 | E4T5D5     | <i>Paludibacter propionigenes</i> | DNA-directed DNA polymerase (EC 2.7.7.7)                                                                                                                            |
| 168 | 309 | 0.01 | A0A0E9GA77 | <i>Chlamydia trachomatis</i>      | Toxin RelK (EC 3.1.-.-)                                                                                                                                             |
| 169 | 309 | 0.01 | A0A1Q3RXA0 | <i>Flavobacterium sp.</i>         | Uncharacterized protein                                                                                                                                             |

|     |     |      |            |                                     |                                                                                                                                         |
|-----|-----|------|------------|-------------------------------------|-----------------------------------------------------------------------------------------------------------------------------------------|
| 170 | 309 | 0.01 | A0A1Q3S7G4 | <i>Flavobacterium sp.</i>           | Acriflavin resistance protein                                                                                                           |
| 171 | 308 | 0.01 | A0A0M9VJW9 | <i>Flavobacterium akiainvivens</i>  | Transposase                                                                                                                             |
| 172 | 308 | 0.01 | A0A0Q7SMD8 | <i>Pelomonas sp.</i>                | Acriflavine resistance protein B                                                                                                        |
| 173 | 308 | 0.01 | A0A1Q3S2Z4 | <i>Flavobacterium sp.</i>           | Aminopeptidase                                                                                                                          |
| 174 | 307 | 0.01 | A0A1E3ZPZ7 | <i>Chryseobacterium sp.</i>         | Peptidase S46                                                                                                                           |
| 175 | 307 | 0.01 | A0A1Q3S5R1 | <i>Flavobacterium sp.</i>           | Uncharacterized protein                                                                                                                 |
| 176 | 307 | 0.01 | A0A1Q3S7K6 | <i>Flavobacterium sp.</i>           | Uncharacterized protein                                                                                                                 |
| 177 | 306 | 0.01 | A0A1Q3RXE2 | <i>Flavobacterium sp.</i>           | Uncharacterized protein                                                                                                                 |
| 178 | 305 | 0.01 | A0A1E4ADZ5 | <i>Chryseobacterium sp.</i>         | ABC transporter substrate-binding protein                                                                                               |
| 179 | 305 | 0.01 | A0A1J5HWN1 | <i>Porphyromonadaceae bacterium</i> | Uncharacterized protein                                                                                                                 |
| 180 | 305 | 0.01 | A0A1Q3LCT2 | <i>Bacteroidales bacterium</i>      | Cell filamentation protein Fic                                                                                                          |
| 181 | 305 | 0.01 | A0A1Q3RT16 | <i>Flavobacterium sp.</i>           | S9 family peptidase                                                                                                                     |
| 182 | 304 | 0.01 | A0A0Q7S7G4 | <i>Pelomonas sp.</i>                | Efflux pump membrane transporter                                                                                                        |
| 183 | 304 | 0.01 | A0A1Q3S7E9 | <i>Flavobacterium sp.</i>           | Formate acetyltransferase                                                                                                               |
| 184 | 304 | 0.01 | A6GYU0     | <i>Flavobacterium psychrophilum</i> | DNA-directed RNA polymerase subunit beta (RNAP subunit beta) (EC 2.7.7.6)<br>(RNA polymerase subunit beta) (Transcriptase subunit beta) |
| 185 | 302 | 0.01 | A0A0Q7RYH2 | <i>Pelomonas sp.</i>                | 4-deoxy-4-formamido-L-arabinose-phospho-UDP deformylase                                                                                 |
| 186 | 302 | 0.01 | A0A1Q3M633 | <i>Bacteroidales bacterium</i>      | ATP-dependent helicase                                                                                                                  |
| 187 | 301 | 0.01 | A0A0Q7SBL7 | <i>Pelomonas sp.</i>                | Efflux pump membrane transporter                                                                                                        |
| 188 | 299 | 0.01 | A0A1Q3S8S4 | <i>Flavobacterium sp.</i>           | Sodium:proline symporter                                                                                                                |
| 189 | 296 | 0.01 | A0A1E4AD61 | <i>Chryseobacterium sp.</i>         | Uncharacterized protein                                                                                                                 |
| 190 | 296 | 0.01 | E4T5Y5     | <i>Paludibacter propionigenes</i>   | Multifunctional fusion protein [Includes: Protein translocase subunit SecD;<br>Protein-export membrane protein SecF]                    |
| 191 | 293 | 0.01 | A0A1Q3S9A2 | <i>Flavobacterium sp.</i>           | Uncharacterized protein                                                                                                                 |
| 192 | 293 | 0.01 | E4T450     | <i>Paludibacter propionigenes</i>   | UvrABC system protein A                                                                                                                 |
| 193 | 291 | 0.01 | A0A0Q7S584 | <i>Pelomonas sp.</i>                | DNA-directed DNA polymerase (EC 2.7.7.7)                                                                                                |
| 194 | 291 | 0.01 | A0A0Q7SCT5 | <i>Pelomonas sp.</i>                | Chromosome partition protein Smc                                                                                                        |
| 195 | 291 | 0.01 | A0A1E4ACZ5 | <i>Chryseobacterium sp.</i>         | TonB-dependent receptor                                                                                                                 |
| 196 | 291 | 0.01 | A0A1Q3RTV8 | <i>Flavobacterium sp.</i>           | Sodium:proton antiporter                                                                                                                |
| 197 | 289 | 0.01 | A0A0N8CUF4 | <i>Daphnia magna</i>                | Uncharacterized protein (Fragment)                                                                                                      |
| 198 | 288 | 0.01 | A0A1Q3RZ42 | <i>Flavobacterium sp.</i>           | Cell envelope biogenesis protein OmpA                                                                                                   |
| 199 | 288 | 0.01 | A0A1T5GFF7 | <i>Sphingobacterium nematocida</i>  | Gliding motility-associated C-terminal domain-containing protein                                                                        |
| 200 | 287 | 0.01 | A0A0L8VCE1 | <i>Sunxiuqinia dokdonensis</i>      | Multidrug transporter AcrB                                                                                                              |
| 201 | 286 | 0.01 | A0A1Q3M3K5 | <i>Bacteroidales bacterium</i>      | Alpha-mannosidase                                                                                                                       |
| 202 | 285 | 0.01 | A0A0P6BFP2 | <i>Daphnia magna</i>                | Uncharacterized protein                                                                                                                 |

|     |     |      |            |                                     |                                                                                                                                                                     |
|-----|-----|------|------------|-------------------------------------|---------------------------------------------------------------------------------------------------------------------------------------------------------------------|
| 203 | 285 | 0.01 | A0A1E4A183 | <i>Chryseobacterium sp.</i>         | Tyrosine protein kinase                                                                                                                                             |
| 204 | 285 | 0.01 | Q8HEC4     | <i>Caenorhabditis briggsae</i>      | NADH-ubiquinone oxidoreductase chain 1 (EC 1.6.5.3) (NADH dehydrogenase subunit 1)                                                                                  |
| 205 | 284 | 0.01 | A0A1E3ZTP9 | <i>Chryseobacterium sp.</i>         | Hybrid sensor histidine kinase/response regulator                                                                                                                   |
| 206 | 284 | 0.01 | A0A1Q3S9F5 | <i>Flavobacterium sp.</i>           | DNA mismatch repair protein MutS                                                                                                                                    |
| 207 | 283 | 0.01 | A0A1Q3S549 | <i>Flavobacterium sp.</i>           | Phenylalanine--tRNA ligase beta subunit (EC 6.1.1.20) (Phenylalanyl-tRNA synthetase beta subunit) (PheRS)                                                           |
| 208 | 282 | 0.01 | A0A0Q7S6W6 | <i>Pelomonas sp.</i>                | Indolepyruvate ferredoxin oxidoreductase (EC 1.2.7.8)                                                                                                               |
| 209 | 282 | 0.01 | A0A1Q3SAJ2 | <i>Flavobacterium sp.</i>           | Tail-specific protease                                                                                                                                              |
| 210 | 280 | 0.01 | A0A1E4A600 | <i>Chryseobacterium sp.</i>         | Recombinase                                                                                                                                                         |
| 211 | 280 | 0.01 | A0A1Q3M5E8 | <i>Bacteroidales bacterium</i>      | Uncharacterized protein (Fragment)                                                                                                                                  |
| 212 | 280 | 0.01 | A0A1Q3RZD7 | <i>Flavobacterium sp.</i>           | ATP-dependent helicase                                                                                                                                              |
| 213 | 280 | 0.01 | A0A1Q3S8N5 | <i>Flavobacterium sp.</i>           | Uncharacterized protein                                                                                                                                             |
| 214 | 279 | 0.01 | A0A1E3ZRN6 | <i>Chryseobacterium sp.</i>         | Uncharacterized protein                                                                                                                                             |
| 215 | 279 | 0.01 | N8QHE7     | <i>Acinetobacter bohemicus</i>      | Uncharacterized protein                                                                                                                                             |
| 216 | 278 | 0.01 | A0A0Q7SJM3 | <i>Pelomonas sp.</i>                | tRNA modification GTPase MnmE (EC 3.6.-.-)                                                                                                                          |
| 217 | 278 | 0.01 | A0A1E4AD98 | <i>Chryseobacterium sp.</i>         | Ribonuclease R (RNase R) (EC 3.1.13.1)                                                                                                                              |
| 218 | 278 | 0.01 |            |                                     |                                                                                                                                                                     |
| 219 | 277 | 0.01 | A0A0Q7RZ30 | <i>Pelomonas sp.</i>                | Acriflavin resistance protein                                                                                                                                       |
| 220 | 277 | 0.01 | A0A0Q7RZF8 | <i>Pelomonas sp.</i>                | Phosphoribosylformylglycinamide synthase (FGAM synthase) (FGAMS) (EC 6.3.5.3) (Formylglycinamide ribonucleotide amidotransferase) (FGAR amidotransferase) (FGAR-AT) |
| 221 | 277 | 0.01 | A0A1G4VJQ3 | <i>Flavobacterium saliperosum</i>   | Gliding motility-associated C-terminal domain-containing protein                                                                                                    |
| 222 | 277 | 0.01 | A0A1M3MAE9 | <i>Paludibacter sp.</i>             | DNA-directed RNA polymerase subunit beta' (RNAP subunit beta') (EC 2.7.7.6) (RNA polymerase subunit beta') (Transcriptase subunit beta')                            |
| 223 | 275 | 0.01 | A0A1Q3S511 | <i>Flavobacterium sp.</i>           | Heat-shock protein Hsp70                                                                                                                                            |
| 224 | 275 | 0.01 | Q5CWD9     | <i>Cryptosporidium parvum</i>       | Predicted secreted protein, signal peptide with several threonines, possible mucin                                                                                  |
| 225 | 274 | 0.01 | S2WV93     | <i>Delftia acidovorans</i>          | Uncharacterized protein                                                                                                                                             |
| 226 | 273 | 0.01 | A0A0Q6T477 | <i>Pelomonas sp.</i>                | Uncharacterized protein                                                                                                                                             |
| 227 | 273 | 0.01 | A0A0Q8H5F4 | <i>Pelomonas sp.</i>                | TonB-dependent receptor                                                                                                                                             |
| 228 | 272 | 0.01 | A0A0Q6UIJ2 | <i>Pelomonas sp.</i>                | Nitrate reductase                                                                                                                                                   |
| 229 | 271 | 0.01 | A0A0Q6U523 | <i>Pelomonas sp.</i>                | Nitric oxide reductase large subunit                                                                                                                                |
| 230 | 271 | 0.01 | A0A0Q7SA64 | <i>Pelomonas sp.</i>                | Transcription-repair-coupling factor (TRCF) (EC 3.6.4.-)                                                                                                            |
| 231 | 271 | 0.01 | A0A1E4A395 | <i>Chryseobacterium sp.</i>         | Peptidase S46                                                                                                                                                       |
| 232 | 271 | 0.01 | A0A1J5HML6 | <i>Porphyromonadaceae bacterium</i> | Penicillin-binding protein                                                                                                                                          |

|     |     |      |            |                                     |                                                                                                                                         |
|-----|-----|------|------------|-------------------------------------|-----------------------------------------------------------------------------------------------------------------------------------------|
| 233 | 271 | 0.01 | A0A1Q3RWQ7 | <i>Flavobacterium sp.</i>           | Cation/H(+) antiporter                                                                                                                  |
| 234 | 270 | 0.01 | A0A0Q8G4H5 | <i>Pelomonas sp.</i>                | Elongation factor Tu (EF-Tu)                                                                                                            |
| 235 | 270 | 0.01 | A0A1Q3RZB2 | <i>Flavobacterium sp.</i>           | Uncharacterized protein                                                                                                                 |
| 236 | 270 | 0.01 | E4T5C1     | <i>Paludibacter propionigenes</i>   | DNA topoisomerase IV subunit A (EC 5.99.1.3)                                                                                            |
| 237 | 268 | 0.01 |            |                                     |                                                                                                                                         |
| 238 | 267 | 0.01 | A0A1Q3RWZ9 | <i>Flavobacterium sp.</i>           | Uncharacterized protein                                                                                                                 |
| 239 | 266 | 0.01 | E4T570     | <i>Paludibacter propionigenes</i>   | DNA-directed RNA polymerase subunit beta (RNAP subunit beta) (EC 2.7.7.6)<br>(RNA polymerase subunit beta) (Transcriptase subunit beta) |
| 240 | 265 | 0.01 | A0A1E3ZRQ0 | <i>Chryseobacterium sp.</i>         | Uncharacterized protein                                                                                                                 |
| 241 | 265 | 0.01 | A0A1E3ZY95 | <i>Chryseobacterium sp.</i>         | Uncharacterized protein                                                                                                                 |
| 242 | 265 | 0.01 | A0A1E4AGS9 | <i>Chryseobacterium sp.</i>         | TonB-dependent receptor                                                                                                                 |
| 243 | 265 | 0.01 | A0A1Q3S6Q0 | <i>Flavobacterium sp.</i>           | DNA polymerase I (EC 2.7.7.7)                                                                                                           |
| 244 | 264 | 0.01 | A0A1E4A8B6 | <i>Chryseobacterium sp.</i>         | Type II and III secretion system protein                                                                                                |
| 245 | 264 | 0.01 | A0A1M3MBI7 | <i>Paludibacter sp.</i>             | Cell surface protein SprA                                                                                                               |
| 246 | 264 | 0.01 | A0A1Q3M609 | <i>Bacteroidales bacterium</i>      | Uncharacterized protein                                                                                                                 |
| 247 | 264 | 0.01 | H8KUZ8     | <i>Solitalea canadensis</i>         | Uncharacterized protein                                                                                                                 |
| 248 | 263 | 0.01 | A0A077XLW7 | <i>Sphinx1.76-related DNA</i>       | Replication protein                                                                                                                     |
| 249 | 263 | 0.01 | A0A1E4AEN9 | <i>Chryseobacterium sp.</i>         | Peptidase S9                                                                                                                            |
| 250 | 262 | 0.01 | A0A0Q6UG42 | <i>Pelomonas sp.</i>                | Pyruvate ferredoxin oxidoreductase                                                                                                      |
| 251 | 261 | 0.01 | A0A1E4AAQ4 | <i>Chryseobacterium sp.</i>         | Copper oxidase                                                                                                                          |
| 252 | 261 | 0.01 | A1W5C2     | <i>Acidovorax sp.</i>               | IstB domain protein ATP-binding protein                                                                                                 |
| 253 | 261 | 0.01 | U6RAE1     | <i>Bacteroides sp.</i>              | Uncharacterized protein                                                                                                                 |
| 254 | 260 | 0.01 | A0A0Q7T0F9 | <i>Pelomonas sp.</i>                | Lon protease (EC 3.4.21.53) (ATP-dependent protease La)                                                                                 |
| 255 | 260 | 0.01 | A0A1Q3S8T7 | <i>Flavobacterium sp.</i>           | Nucleotidyltransferase                                                                                                                  |
| 256 | 260 | 0.01 | E4T1A7     | <i>Paludibacter propionigenes</i>   | Pyruvate phosphate dikinase PEP/pyruvate-binding protein                                                                                |
| 257 | 259 | 0.01 | A0A1J5HGG6 | <i>Porphyromonadaceae bacterium</i> | DNA-directed RNA polymerase subunit beta (RNAP subunit beta) (EC 2.7.7.6)<br>(RNA polymerase subunit beta) (Transcriptase subunit beta) |
| 258 | 258 | 0.01 | A0A1E4A7R6 | <i>Chryseobacterium sp.</i>         | Uncharacterized protein                                                                                                                 |
| 259 | 258 | 0.01 | A0A1Q3S6R5 | <i>Flavobacterium sp.</i>           | Uncharacterized protein                                                                                                                 |
| 260 | 257 | 0.01 | A0A1Q3S1W4 | <i>Flavobacterium sp.</i>           | Sulfatase                                                                                                                               |
| 261 | 257 | 0.01 | K0XEC8     | <i>Lachnoanaerobaculum sp.</i>      | Uncharacterized protein                                                                                                                 |
| 262 | 256 | 0.01 | A0A0Q7SFB9 | <i>Pelomonas sp.</i>                | Multidrug transporter                                                                                                                   |
| 263 | 256 | 0.01 | A0A0Q8GR06 | <i>Pelomonas sp.</i>                | Alpha-2-macroglobulin                                                                                                                   |
| 264 | 256 | 0.01 | A0A1E4AC51 | <i>Chryseobacterium sp.</i>         | Helicase                                                                                                                                |
| 265 | 256 | 0.01 | E4T2N1     | <i>Paludibacter propionigenes</i>   | DNA gyrase subunit A (EC 5.99.1.3)                                                                                                      |
| 266 | 255 | 0.01 | A0A0P6IS02 | <i>Daphnia magna</i>                | Uncharacterized protein                                                                                                                 |

|     |     |      |            |                                     |                                                                                                                                                                                                                                                                                                                                                    |
|-----|-----|------|------------|-------------------------------------|----------------------------------------------------------------------------------------------------------------------------------------------------------------------------------------------------------------------------------------------------------------------------------------------------------------------------------------------------|
| 267 | 254 | 0.01 | A0A023UNGO | <i>Magnusiomyces ingens</i>         | Uncharacterized protein (Fragment)                                                                                                                                                                                                                                                                                                                 |
| 268 | 254 | 0.01 | A0A0D6TL26 | <i>Flavobacterium sp.</i>           | Metalloprotease                                                                                                                                                                                                                                                                                                                                    |
| 269 | 254 | 0.01 | A0A1E3ZX97 | <i>Chryseobacterium sp.</i>         | Gliding motility protein                                                                                                                                                                                                                                                                                                                           |
| 270 | 253 | 0.01 | A0A1Q3S6W5 | <i>Flavobacterium sp.</i>           | Peptidase M16                                                                                                                                                                                                                                                                                                                                      |
| 271 | 253 | 0.01 |            |                                     |                                                                                                                                                                                                                                                                                                                                                    |
| 272 | 252 | 0.01 | A0A0POUB73 | <i>Flavobacterium psychrophilum</i> | Multidrug transporter AcrB                                                                                                                                                                                                                                                                                                                         |
| 273 | 252 | 0.01 | A0A0Q7SE50 | <i>Pelomonas sp.</i>                | Bifunctional glutamine synthetase adenylyltransferase/adenylyl-removing enzyme (ATP:glutamine synthetase adenylyltransferase) (ATase) [Includes: Glutamine synthetase adenylyl-L-tyrosine phosphorylase (EC 2.7.7.89) (Adenylyl removase) (AR) (AT-N); Glutamine synthetase adenylyl transferase (EC 2.7.7.42) (Adenylyl transferase) (AT) (AT-C)] |
| 274 | 252 | 0.01 | A0A0Q7SEF7 | <i>Pelomonas sp.</i>                | Translation initiation factor IF-2                                                                                                                                                                                                                                                                                                                 |
| 275 | 252 | 0.01 | A0A1E3ZYM1 | <i>Chryseobacterium sp.</i>         | Peptidylprolyl isomerase (EC 5.2.1.8)                                                                                                                                                                                                                                                                                                              |
| 276 | 252 | 0.01 | A0A1E4A473 | <i>Chryseobacterium sp.</i>         | Penicillin-binding protein 2                                                                                                                                                                                                                                                                                                                       |
| 277 | 252 | 0.01 | A0A1Q3RY20 | <i>Flavobacterium sp.</i>           | Collagen-binding protein                                                                                                                                                                                                                                                                                                                           |
| 278 | 252 | 0.01 | E4T2W8     | <i>Paludibacter propionigenes</i>   | Pyruvate carboxylase (EC 6.4.1.1)                                                                                                                                                                                                                                                                                                                  |
| 279 | 251 | 0.01 | A0A0Q6SZK0 | <i>Pelomonas sp.</i>                | Protein translocase subunit SecA                                                                                                                                                                                                                                                                                                                   |
| 280 | 251 | 0.01 | A0A0Q7S238 | <i>Pelomonas sp.</i>                | Histidine kinase                                                                                                                                                                                                                                                                                                                                   |
| 281 | 251 | 0.01 | A0A1Q3S878 | <i>Flavobacterium sp.</i>           | Patatin                                                                                                                                                                                                                                                                                                                                            |
| 282 | 250 | 0.01 | A0A0D5CAE6 | <i>Oscheius chongmingensis</i>      | NADH-ubiquinone oxidoreductase chain 4 (EC 1.6.5.3)                                                                                                                                                                                                                                                                                                |
| 283 | 250 | 0.01 | A0A0Q7SD92 | <i>Pelomonas sp.</i>                | Uncharacterized protein                                                                                                                                                                                                                                                                                                                            |
| 284 | 250 | 0.01 | A0A0Q7SH01 | <i>Pelomonas sp.</i>                | Lysine decarboxylase                                                                                                                                                                                                                                                                                                                               |
| 285 | 250 | 0.01 | A0A1E4ACD4 | <i>Chryseobacterium sp.</i>         | Gliding motility lipoprotein GldJ                                                                                                                                                                                                                                                                                                                  |
| 286 | 250 | 0.01 | E4T571     | <i>Paludibacter propionigenes</i>   | DNA-directed RNA polymerase subunit beta' (RNAP subunit beta') (EC 2.7.7.6) (RNA polymerase subunit beta') (Transcriptase subunit beta')                                                                                                                                                                                                           |
| 287 | 249 | 0.01 | A0A0Q7SEL2 | <i>Pelomonas sp.</i>                | Uncharacterized protein                                                                                                                                                                                                                                                                                                                            |
| 288 | 249 | 0.01 | A0A1E4A2H0 | <i>Chryseobacterium sp.</i>         | Peptidylprolyl isomerase                                                                                                                                                                                                                                                                                                                           |
| 289 | 249 | 0.01 | A0A1Q3S481 | <i>Flavobacterium sp.</i>           | Uncharacterized protein                                                                                                                                                                                                                                                                                                                            |
| 290 | 248 | 0.01 | A0A1E4ABW2 | <i>Chryseobacterium sp.</i>         | Peptidase M1                                                                                                                                                                                                                                                                                                                                       |
| 291 | 247 | 0.01 | A0A1E4A9N2 | <i>Chryseobacterium sp.</i>         | Uncharacterized protein                                                                                                                                                                                                                                                                                                                            |
| 292 | 247 | 0.01 | A0A1L4BMB6 | <i>Didymosphenia geminata</i>       | NADH dehydrogenase subunit 7                                                                                                                                                                                                                                                                                                                       |
| 293 | 246 | 0.01 | A0A0Q7S7S5 | <i>Pelomonas sp.</i>                | Valine--tRNA ligase (EC 6.1.1.9) (Valyl-tRNA synthetase) (ValRS)                                                                                                                                                                                                                                                                                   |
| 294 | 246 | 0.01 | E4T2R0     | <i>Paludibacter propionigenes</i>   | ATPase AAA-2 domain protein                                                                                                                                                                                                                                                                                                                        |
| 295 | 245 | 0.01 | A0A0Q7SRF6 | <i>Pelomonas sp.</i>                | DNA topoisomerase III                                                                                                                                                                                                                                                                                                                              |
| 296 | 245 | 0.01 | A0A0Q8H4A2 | <i>Pelomonas sp.</i>                | Uncharacterized protein                                                                                                                                                                                                                                                                                                                            |
| 297 | 245 | 0.01 | A0A1E4A0Q8 | <i>Chryseobacterium sp.</i>         | Polysaccharide biosynthesis protein                                                                                                                                                                                                                                                                                                                |

|     |     |      |            |                                        |                                                                                                                                                                                                   |
|-----|-----|------|------------|----------------------------------------|---------------------------------------------------------------------------------------------------------------------------------------------------------------------------------------------------|
| 298 | 245 | 0.01 | A0A1Q3RZ46 | <i>Flavobacterium sp.</i>              | Uncharacterized protein                                                                                                                                                                           |
| 299 | 245 | 0.01 | A0A1Q3S3S5 | <i>Flavobacterium sp.</i>              | Uncharacterized protein                                                                                                                                                                           |
| 300 | 244 | 0.01 | K9L3F4     | <i>Magnusiomyces magnusii</i>          | NADH-ubiquinone oxidoreductase chain 1 (EC 1.6.5.3)                                                                                                                                               |
| 301 | 243 | 0.01 | E4T7X4     | <i>Paludibacter propionigenes</i>      | Alanine--tRNA ligase (EC 6.1.1.7) (Alanyl-tRNA synthetase) (AlaRS)                                                                                                                                |
| 302 | 242 | 0.01 | A0A0Q7T172 | <i>Pelomonas sp.</i>                   | Ribonucleoside-diphosphate reductase (EC 1.17.4.1)                                                                                                                                                |
| 303 | 242 | 0.01 | A0A0Q8H242 | <i>Pelomonas sp.</i>                   | PAS domain-containing sensor histidine kinase                                                                                                                                                     |
| 304 | 242 | 0.01 | A0A1M3DNS5 | <i>Bacteroidales bacterium</i>         | Putative K(+)-stimulated pyrophosphate-energized sodium pump (EC 3.6.1.1) (Membrane-bound sodium-translocating pyrophosphatase) (Pyrophosphate-energized inorganic pyrophosphatase) (Na(+)-PPase) |
| 305 | 242 | 0.01 | A0A1M3MCY6 | <i>Paludibacter sp.</i>                | Glycosyl hydrolase                                                                                                                                                                                |
| 306 | 242 | 0.01 | F3PIP2     | <i>Bacteroides clarus</i>              | TonB-dependent receptor plug domain protein                                                                                                                                                       |
| 307 | 241 | 0.01 | A0A0Q7SKX9 | <i>Pelomonas sp.</i>                   | ATP-dependent helicase                                                                                                                                                                            |
| 308 | 241 | 0.01 | A0A0Q7T1P6 | <i>Pelomonas sp.</i>                   | 3-hydroxyacyl-CoA dehydrogenase                                                                                                                                                                   |
| 309 | 241 | 0.01 | A0A0T5VFN0 | <i>Pedobacter ginsenosidimutans</i>    | SusC/RagA family TonB-linked outer membrane protein                                                                                                                                               |
| 310 | 241 | 0.01 | A0A142L3A0 | <i>Bacteroidetes bacterium</i>         | DEAD/DEAH box helicase                                                                                                                                                                            |
| 311 | 241 | 0.01 | A0A1Q3RTV6 | <i>Flavobacterium sp.</i>              | Uncharacterized protein                                                                                                                                                                           |
| 312 | 241 | 0.01 | A0A1Q3RX80 | <i>Flavobacterium sp.</i>              | Uncharacterized protein                                                                                                                                                                           |
| 313 | 241 | 0.01 | A0A1Q3S955 | <i>Flavobacterium sp.</i>              | Polyphosphate kinase (EC 2.7.4.1) (ATP-polyphosphate phosphotransferase) (Polyphosphoric acid kinase)                                                                                             |
| 314 | 239 | 0.01 | A0A1Q3S8C6 | <i>Flavobacterium sp.</i>              | Uncharacterized protein                                                                                                                                                                           |
| 315 | 239 | 0.01 | A0A1Q3S9B2 | <i>Flavobacterium sp.</i>              | Uncharacterized protein                                                                                                                                                                           |
| 316 | 239 | 0.01 | B1N6J8     | <i>uncultured beta proteobacterium</i> | Putative uncharacterized protein                                                                                                                                                                  |
| 317 | 239 | 0.01 | E4T676     | <i>Paludibacter propionigenes</i>      | Collagenase                                                                                                                                                                                       |
| 318 | 238 | 0.01 | A0A0D5C9J6 | <i>Oscheius chongmingensis</i>         | NADH dehydrogenase subunit 5                                                                                                                                                                      |
| 319 | 238 | 0.01 | E4T653     | <i>Paludibacter propionigenes</i>      | Peptidoglycan glycosyltransferase (EC 2.4.1.129)                                                                                                                                                  |
| 320 | 238 | 0.01 | E4T8D5     | <i>Paludibacter propionigenes</i>      | Orn/DAP/Arg decarboxylase 2                                                                                                                                                                       |
| 321 | 237 | 0.01 | A0A0Q6WEF8 | <i>Pelomonas sp.</i>                   | Uncharacterized protein                                                                                                                                                                           |
| 322 | 237 | 0.01 | A0A0Q7T6T8 | <i>Pelomonas sp.</i>                   | Histidine kinase                                                                                                                                                                                  |
| 323 | 237 | 0.01 | A0A1Q3S478 | <i>Flavobacterium sp.</i>              | Conjugal transfer protein TraG                                                                                                                                                                    |
| 324 | 236 | 0.01 | A0A023UP21 | <i>Magnusiomyces ingens</i>            | Ribosomal protein S3                                                                                                                                                                              |
| 325 | 236 | 0.01 | A0A1Q3RXD8 | <i>Flavobacterium sp.</i>              | UvrABC system protein A                                                                                                                                                                           |
| 326 | 236 | 0.01 | E4TOX8     | <i>Paludibacter propionigenes</i>      | DNA helicase (EC 3.6.4.12)                                                                                                                                                                        |
| 327 | 235 | 0.01 | A0A0Q6TP10 | <i>Pelomonas sp.</i>                   | Uncharacterized protein                                                                                                                                                                           |
| 328 | 234 | 0.01 | A0A1J5I0W6 | <i>Porphyromonadaceae bacterium</i>    | DNA mismatch repair protein MutS                                                                                                                                                                  |

|     |     |      |            |                                     |                                                                                                                                                                     |
|-----|-----|------|------------|-------------------------------------|---------------------------------------------------------------------------------------------------------------------------------------------------------------------|
| 329 | 234 | 0.01 | A0A1Q3S0W7 | <i>Flavobacterium sp.</i>           | Uncharacterized protein                                                                                                                                             |
| 330 | 234 | 0.01 | A0A1Q3SAK4 | <i>Flavobacterium sp.</i>           | TonB-dependent receptor                                                                                                                                             |
| 331 | 233 | 0.01 | A0A0Q7S4W2 | <i>Pelomonas sp.</i>                | FAD-linked oxidase                                                                                                                                                  |
| 332 | 233 | 0.01 | A0A0Q7T373 | <i>Pelomonas sp.</i>                | Ribonuclease R (RNase R) (EC 3.1.13.1)                                                                                                                              |
| 333 | 233 | 0.01 | A0A1J5HBV2 | <i>Porphyromonadaceae bacterium</i> | Uncharacterized protein                                                                                                                                             |
| 334 | 233 | 0.01 | A0A1Q3SB52 | <i>Flavobacterium sp.</i>           | Acriflavin resistance protein                                                                                                                                       |
| 335 | 233 | 0.01 | E4T2H4     | <i>Paludibacter propionigenes</i>   | Phosphoribosylformylglycinamide synthase (FGAM synthase) (FGAMS) (EC 6.3.5.3) (Formylglycinamide ribonucleotide amidotransferase) (FGAR amidotransferase) (FGAR-AT) |
| 336 | 233 | 0.01 | E4T3X9     | <i>Paludibacter propionigenes</i>   | DNA topoisomerase III (EC 5.99.1.2)                                                                                                                                 |
| 337 | 231 | 0.01 | A0A0Q6T5H8 | <i>Pelomonas sp.</i>                | Nodulation protein NolG                                                                                                                                             |
| 338 | 231 | 0.01 | A0A0Q6XBI6 | <i>Pelomonas sp.</i>                | Penicillin-binding protein 1C                                                                                                                                       |
| 339 | 231 | 0.01 | A0A0Q7SN01 | <i>Pelomonas sp.</i>                | ATPase                                                                                                                                                              |
| 340 | 231 | 0.01 | A0A0Q7SRK7 | <i>Pelomonas sp.</i>                | Leucine--tRNA ligase (EC 6.1.1.4) (Leucyl-tRNA synthetase) (LeuRS)                                                                                                  |
| 341 | 231 | 0.01 | I4ZNR1     | <i>Acinetobacter sp.</i>            | Uncharacterized protein (Fragment)                                                                                                                                  |
| 342 | 230 | 0.01 | E4T3F8     | <i>Paludibacter propionigenes</i>   | L-glutamine synthetase (EC 6.3.1.2)                                                                                                                                 |
| 343 | 229 | 0.01 | D7W2K3     | <i>Chryseobacterium gleum</i>       | Uncharacterized protein                                                                                                                                             |
| 344 | 228 | 0.01 | A0A0Q7SLN7 | <i>Pelomonas sp.</i>                | UvrABC system protein A (UvrA protein) (Excinuclease ABC subunit A)                                                                                                 |
| 345 | 228 | 0.01 | A0A1E3ZYZ1 | <i>Chryseobacterium sp.</i>         | Uncharacterized protein                                                                                                                                             |
| 346 | 228 | 0.01 | E4T1U6     | <i>Paludibacter propionigenes</i>   | Carbamoyl-phosphate synthase L chain ATP-binding protein (EC 6.4.1.1)                                                                                               |
| 347 | 228 | 0.01 | I2JQL4     | <i>Brettanomyces bruxellensis</i>   | Uncharacterized protein                                                                                                                                             |
| 348 | 227 | 0.01 | A0A023UP13 | <i>Magnusiomyces ingens</i>         | NADH-ubiquinone oxidoreductase chain 4 (EC 1.6.5.3)                                                                                                                 |
| 349 | 227 | 0.01 | A0A023UPL4 | <i>Magnusiomyces ingens</i>         | Uncharacterized protein (Fragment)                                                                                                                                  |
| 350 | 227 | 0.01 | A0A0M8MHN4 | <i>Flavobacterium akiainvivens</i>  | Elongation factor G (EF-G)                                                                                                                                          |
| 351 | 227 | 0.01 | A0A0Q7SAX3 | <i>Pelomonas sp.</i>                | Glycine dehydrogenase (decarboxylating) (EC 1.4.4.2) (Glycine cleavage system P-protein) (Glycine decarboxylase) (Glycine dehydrogenase (aminomethyl-transferring)) |
| 352 | 227 | 0.01 | A0A1E4ABE8 | <i>Chryseobacterium sp.</i>         | Methionine synthase                                                                                                                                                 |
| 353 | 227 | 0.01 | A0A1Q3RY34 | <i>Flavobacterium sp.</i>           | TonB-dependent receptor                                                                                                                                             |
| 354 | 227 | 0.01 | D8D4W5     | <i>Comamonas testosteroni</i>       | Uncharacterized protein                                                                                                                                             |
| 355 | 226 | 0.01 | A0A1B4SJP8 | <i>Burkholderia sp.</i>             | Uncharacterized protein                                                                                                                                             |
| 356 | 226 | 0.01 | A0A1E4A3F0 | <i>Chryseobacterium sp.</i>         | DNA topoisomerase IV                                                                                                                                                |
| 357 | 226 | 0.01 | A0A1M3DJX9 | <i>Bacteroidales bacterium</i>      | Beta-galactosidase (EC 3.2.1.23) (Lactase)                                                                                                                          |
| 358 | 226 | 0.01 | A0A1Q3SAW0 | <i>Flavobacterium sp.</i>           | Sugar hydrolase                                                                                                                                                     |
| 359 | 226 | 0.01 |            |                                     |                                                                                                                                                                     |



|     |     |      |            |                                     |                                                                                                                                                                     |
|-----|-----|------|------------|-------------------------------------|---------------------------------------------------------------------------------------------------------------------------------------------------------------------|
| 360 | 225 | 0.01 | A0A0Q6WQC8 | <i>Pelomonas sp.</i>                | Uncharacterized protein                                                                                                                                             |
| 361 | 225 | 0.01 | A0A0Q7SCD0 | <i>Pelomonas sp.</i>                | NADPH-dependent 2,4-dienoyl-CoA reductase (EC 1.3.1.34)                                                                                                             |
| 362 | 225 | 0.01 | A0A0T5VPL4 | <i>Pedobacter ginsenosidimitans</i> | Uncharacterized protein                                                                                                                                             |
| 363 | 225 | 0.01 | A0A1Q3S1U2 | <i>Flavobacterium sp.</i>           | Phosphoribosylformylglycinamide synthase (FGAM synthase) (FGAMS) (EC 6.3.5.3) (Formylglycinamide ribonucleotide amidotransferase) (FGAR amidotransferase) (FGAR-AT) |
| 364 | 225 | 0.01 | T1JK00     | <i>Strigamia maritima</i>           | Uncharacterized protein                                                                                                                                             |
| 365 | 224 | 0.01 | A0A1E4AGP3 | <i>Chryseobacterium sp.</i>         | TonB-dependent receptor                                                                                                                                             |
| 366 | 224 | 0.01 | A0A1E4AQU3 | <i>Chryseobacterium sp.</i>         | Phage tail protein                                                                                                                                                  |
| 367 | 224 | 0.01 | A0A1J5HIK6 | <i>Porphyromonadaceae bacterium</i> | UDP-N-acetylglucosamine 2-epimerase                                                                                                                                 |
| 368 | 224 | 0.01 | A0A1Q3RW26 | <i>Flavobacterium sp.</i>           | Isocitrate dehydrogenase (NADP(+))                                                                                                                                  |
| 369 | 224 | 0.01 | A0A1Q3RX31 | <i>Flavobacterium sp.</i>           | Copper-translocating P-type ATPase                                                                                                                                  |
| 370 | 224 | 0.01 | A0A1Q3S1B3 | <i>Flavobacterium sp.</i>           | S9 family peptidase                                                                                                                                                 |
| 371 | 224 | 0.01 | A0A1Q3S421 | <i>Flavobacterium sp.</i>           | Uncharacterized protein (Fragment)                                                                                                                                  |
| 372 | 224 | 0.01 | A0A1Q3SA66 | <i>Flavobacterium sp.</i>           | Polyribonucleotide nucleotidyltransferase (EC 2.7.7.8) (Polynucleotide phosphorylase) (PNPase)                                                                      |
| 373 | 224 | 0.01 | D8L7S1     | <i>Paramecium caudatum</i>          | NADH-ubiquinone oxidoreductase chain 5 (EC 1.6.5.3)                                                                                                                 |
| 374 | 224 | 0.01 | R6DEG5     | <i>Bacteroides sp.</i>              | RagB/SusD domain-containing protein                                                                                                                                 |
| 375 | 223 | 0.01 | A0A0Q7S0G4 | <i>Pelomonas sp.</i>                | AAA family ATPase                                                                                                                                                   |
| 376 | 223 | 0.01 | A0A0Q7SUY8 | <i>Pelomonas sp.</i>                | Enoyl-CoA hydratase                                                                                                                                                 |
| 377 | 223 | 0.01 | A0A1E4AH32 | <i>Chryseobacterium sp.</i>         | Endothelin-converting protein                                                                                                                                       |
| 378 | 223 | 0.01 | A0A1Q3SAU5 | <i>Flavobacterium sp.</i>           | S9 family peptidase                                                                                                                                                 |
| 379 | 222 | 0.01 | A0A0Q7SY69 | <i>Pelomonas sp.</i>                | DNA helicase (EC 3.6.4.12)                                                                                                                                          |
| 380 | 222 | 0.01 | A0A1Q3RU83 | <i>Flavobacterium sp.</i>           | Primosomal protein N' (EC 3.6.4.-) (ATP-dependent helicase PriA)                                                                                                    |
| 381 | 222 | 0.01 | A0A1Q3S9I3 | <i>Flavobacterium sp.</i>           | Type IV secretion protein Rhs                                                                                                                                       |
| 382 | 221 | 0.01 | A0A073CD69 | <i>Planktothrix agardhii</i>        | Uncharacterized protein                                                                                                                                             |
| 383 | 221 | 0.01 | A0A0Q8GMD4 | <i>Pelomonas sp.</i>                | Uncharacterized protein                                                                                                                                             |
| 384 | 221 | 0.01 | A0A1Q3S4W4 | <i>Flavobacterium sp.</i>           | Oligopeptidase B                                                                                                                                                    |
| 385 | 220 | 0.01 | A0A0Q7TOV8 | <i>Pelomonas sp.</i>                | Sodium:solute symporter                                                                                                                                             |
| 386 | 220 | 0.01 | A0A178FWP5 | <i>Acinetobacter sp.</i>            | Transposase                                                                                                                                                         |
| 387 | 220 | 0.01 | A0A1M3M9Z9 | <i>Paludibacter sp.</i>             | Uncharacterized protein                                                                                                                                             |
| 388 | 220 | 0.01 | A0A1Q3S6U9 | <i>Flavobacterium sp.</i>           | Uncharacterized protein                                                                                                                                             |
| 389 | 220 | 0.01 | K9L3A6     | <i>Magnusiomyces magnusii</i>       | NADH-ubiquinone oxidoreductase chain 5 (EC 1.6.5.3)                                                                                                                 |
| 390 | 219 | 0.01 | A0A0Q5LD55 | <i>Acidovorax sp.</i>               | Transposase (Fragment)                                                                                                                                              |
| 391 | 219 | 0.01 | A0A0Q6TGN2 | <i>Pelomonas sp.</i>                | DNA helicase (EC 3.6.4.12)                                                                                                                                          |

|     |     |      |            |                                     |                                                                                                           |
|-----|-----|------|------------|-------------------------------------|-----------------------------------------------------------------------------------------------------------|
| 392 | 219 | 0.01 | A0A0Q6WDL9 | <i>Pelomonas sp.</i>                | Serine/threonine protein kinase                                                                           |
| 393 | 219 | 0.01 | A0A0Q6WDT0 | <i>Pelomonas sp.</i>                | Copper-transporting ATPase                                                                                |
| 394 | 219 | 0.01 | A0A0Q7ST55 | <i>Pelomonas sp.</i>                | Guanosine-3',5'-bis(Diphosphate) 3'-pyrophosphohydrolase                                                  |
| 395 | 219 | 0.01 | A0A0R0LL75 | <i>Ferrovum sp.</i>                 | N-6 DNA methylase                                                                                         |
| 396 | 219 | 0.01 | E4T3R5     | <i>Paludibacter propionigenes</i>   | Phenylalanine--tRNA ligase beta subunit (EC 6.1.1.20) (Phenylalanyl-tRNA synthetase beta subunit) (PheRS) |
| 397 | 218 | 0.01 | A0A0Q6TCI2 | <i>Pelomonas sp.</i>                | Uncharacterized protein                                                                                   |
| 398 | 218 | 0.01 | A0A0Q7S0S4 | <i>Pelomonas sp.</i>                | GTP pyrophosphokinase                                                                                     |
| 399 | 218 | 0.01 | A0A0Q7SL61 | <i>Pelomonas sp.</i>                | 2-oxoglutarate dehydrogenase subunit E1 (EC 1.2.4.2)                                                      |
| 400 | 218 | 0.01 | A0A133PWA7 | <i>Prevotella corporis</i>          | Transposase                                                                                               |
| 401 | 218 | 0.01 | A0A1E3ZWT8 | <i>Chryseobacterium sp.</i>         | Translation initiation factor IF-2                                                                        |
| 402 | 218 | 0.01 | A0A1Q3RUB8 | <i>Flavobacterium sp.</i>           | TonB-dependent receptor                                                                                   |
| 403 | 218 | 0.01 | A0A1Q3S932 | <i>Flavobacterium sp.</i>           | Uncharacterized protein                                                                                   |
| 404 | 216 | 0.01 | A0A0Q7SL81 | <i>Pelomonas sp.</i>                | Uncharacterized protein                                                                                   |
| 405 | 216 | 0.01 | A0A0Q7TOL4 | <i>Pelomonas sp.</i>                | Primosomal protein N' (EC 3.6.4.-) (ATP-dependent helicase PriA)                                          |
| 406 | 216 | 0.01 | A0A1E4ABB0 | <i>Chryseobacterium sp.</i>         | Homoserine dehydrogenase                                                                                  |
| 407 | 216 | 0.01 | A0A1G0M577 | <i>Geobacteraceae bacterium</i>     | Uncharacterized protein                                                                                   |
| 408 | 216 | 0.01 | E4T386     | <i>Paludibacter propionigenes</i>   | Heterodimeric methylmalonyl-CoA mutase large subunit (EC 5.4.99.2)                                        |
| 409 | 216 | 0.01 | S3C5M7     | <i>Ophiostoma piceae</i>            | Uncharacterized protein                                                                                   |
| 410 | 215 | 0.01 | A0A0Q7SDY4 | <i>Pelomonas sp.</i>                | GCN5 family acetyltransferase                                                                             |
| 411 | 215 | 0.01 | A0A1E4ADX4 | <i>Chryseobacterium sp.</i>         | BatD protein                                                                                              |
| 412 | 215 | 0.01 | A0A1Q3S9E5 | <i>Flavobacterium sp.</i>           | Signal peptide peptidase SppA                                                                             |
| 413 | 214 | 0.01 | A0A0H5Q1D3 | <i>uncultured prokaryote</i>        | Uncharacterized protein                                                                                   |
| 414 | 214 | 0.01 | A0A0Q7SNJ9 | <i>Pelomonas sp.</i>                | Cyanophycin synthetase                                                                                    |
| 415 | 214 | 0.01 | A0A1Q3LBC0 | <i>Bacteroidales bacterium 45-6</i> | Uncharacterized protein                                                                                   |
| 416 | 214 | 0.01 | E4T1S7     | <i>Paludibacter propionigenes</i>   | Carbamoyl-phosphate synthase small chain (EC 6.3.5.5) (Carbamoyl-phosphate synthetase glutamine chain)    |
| 417 | 213 | 0.01 | A0A0Q7SL07 | <i>Pelomonas sp.</i>                | DNA polymerase I (EC 2.7.7.7)                                                                             |
| 418 | 213 | 0.01 | A0A1J5HP94 | <i>Porphyromonadaceae bacterium</i> | UPF0313 protein AUK44_04705                                                                               |
| 419 | 213 | 0.01 | A0A1Q3RVM0 | <i>Flavobacterium sp.</i>           | Flagellar motor protein MotB                                                                              |
| 420 | 213 | 0.01 | A0A1Q3RW11 | <i>Flavobacterium sp.</i>           | Magnesium-translocating P-type ATPase                                                                     |
| 421 | 212 | 0.01 | A0A1E4AQU9 | <i>Chryseobacterium sp.</i>         | Uncharacterized protein                                                                                   |
| 422 | 212 | 0.01 | A0A1Q3M5Y6 | <i>Bacteroidales bacterium</i>      | Uncharacterized protein                                                                                   |
| 423 | 212 | 0.01 | I2F7Y4     | <i>Mesotoga prima</i>               | Retron-type reverse transcriptase                                                                         |
| 424 | 212 | 0.01 |            |                                     |                                                                                                           |

|     |     |      |            |                                     |                                                                                                                                                 |
|-----|-----|------|------------|-------------------------------------|-------------------------------------------------------------------------------------------------------------------------------------------------|
| 425 | 211 | 0.01 | A0A0Q6TFR1 | <i>Pelomonas sp.</i>                | Uncharacterized protein                                                                                                                         |
| 426 | 211 | 0.01 | A0A0Q7S182 | <i>Pelomonas sp.</i>                | Phenylalanine--tRNA ligase beta subunit (EC 6.1.1.20) (Phenylalanyl-tRNA synthetase beta subunit) (PheRS)                                       |
| 427 | 211 | 0.01 | A0A1E4AFH6 | <i>Chryseobacterium sp.</i>         | Leucine--tRNA ligase (EC 6.1.1.4) (Leucyl-tRNA synthetase) (LeuRS)                                                                              |
| 428 | 211 | 0.01 | A0A1M6UHC8 | <i>Chryseobacterium molle</i>       | Uncharacterized protein                                                                                                                         |
| 429 | 211 | 0.01 | E4T682     | <i>Paludibacter propionigenes</i>   | UvrABC system protein C (Protein UvrC) (Excinuclease ABC subunit C)                                                                             |
| 430 | 211 | 0.01 | G7ZJ76     | <i>Azospirillum lipoferum</i>       | Uncharacterized protein                                                                                                                         |
| 431 | 211 | 0.01 |            |                                     |                                                                                                                                                 |
| 432 | 210 | 0.01 | A0A1E4A3S3 | <i>Chryseobacterium sp.</i>         | Glycosyl transferase                                                                                                                            |
| 433 | 210 | 0.01 | A0A1J5HSL1 | <i>Porphyromonadaceae bacterium</i> | Pyruvate-flavodoxin oxidoreductase (EC 1.2.7.-)                                                                                                 |
| 434 | 210 | 0.01 | A0A1Q3RZR6 | <i>Flavobacterium sp.</i>           | Flagellar motor protein MotB                                                                                                                    |
| 435 | 210 | 0.01 | W1I7F0     | <i>uncultured bacterium</i>         | Uncultured bacterium extrachromosomal DNA RGI01790                                                                                              |
| 436 | 209 | 0.01 | A0A1E3ZZS5 | <i>Chryseobacterium sp.</i>         | Amino acid transporter                                                                                                                          |
| 437 | 209 | 0.01 | A0A1F3LNZ9 | <i>Bacteroidetes bacterium</i>      | Glucarate dehydratase                                                                                                                           |
| 438 | 209 | 0.01 | A0A1J5HRY1 | <i>Porphyromonadaceae bacterium</i> | Cell surface protein SprA                                                                                                                       |
| 439 | 209 | 0.01 | A0A1Q3S4I8 | <i>Flavobacterium sp.</i>           | Uncharacterized protein                                                                                                                         |
| 440 | 209 | 0.01 |            |                                     |                                                                                                                                                 |
| 441 | 209 | 0.01 |            |                                     |                                                                                                                                                 |
| 442 | 208 | 0.01 | A0A023UMR4 | <i>Magnusiomyces ingens</i>         | NADH-ubiquinone oxidoreductase chain 3 (EC 1.6.5.3)                                                                                             |
| 443 | 208 | 0.01 | A0A0Q6TOC3 | <i>Pelomonas sp.</i>                | DNA repair protein RecN (Recombination protein N)                                                                                               |
| 444 | 208 | 0.01 | A0A0Q7SDQ5 | <i>Pelomonas sp.</i>                | Efflux pump membrane transporter                                                                                                                |
| 445 | 208 | 0.01 | A0A1E4ELA1 | <i>Paludibacter sp.</i>             | Dihydrodipicolinate synthase family protein                                                                                                     |
| 446 | 208 | 0.01 | A0A1Q3SA76 | <i>Flavobacterium sp.</i>           | Gliding motility protein GldM                                                                                                                   |
| 447 | 208 | 0.01 | E4T409     | <i>Paludibacter propionigenes</i>   | Mg chelatase, subunit ChlI                                                                                                                      |
| 448 | 208 | 0.01 | E4T5B8     | <i>Paludibacter propionigenes</i>   | Translation elongation factor 2 (EF-2/EF-G)                                                                                                     |
| 449 | 207 | 0.01 | A0A0Q5UMI6 | <i>Flavobacterium sp.</i>           | Uncharacterized protein                                                                                                                         |
| 450 | 207 | 0.01 | A0A0Q7SNK2 | <i>Pelomonas sp.</i>                | Short-chain dehydrogenase                                                                                                                       |
| 451 | 207 | 0.01 | A0A0Q8H0M9 | <i>Pelomonas sp.</i>                | Uncharacterized protein                                                                                                                         |
| 452 | 207 | 0.01 | A0A1E4A4U4 | <i>Chryseobacterium sp.</i>         | Uncharacterized protein                                                                                                                         |
| 453 | 207 | 0.01 | A0A1E4ACP7 | <i>Chryseobacterium sp.</i>         | Sodium:solute symporter                                                                                                                         |
| 454 | 207 | 0.01 | A0A1E4AGM4 | <i>Chryseobacterium sp.</i>         | Radical SAM protein                                                                                                                             |
| 455 | 207 | 0.01 | A0A1Q3S796 | <i>Flavobacterium sp.</i>           | Dehydrogenase                                                                                                                                   |
| 456 | 207 | 0.01 | E4T4N5     | <i>Paludibacter propionigenes</i>   | 2-succinyl-5-enolpyruvyl-6-hydroxy-3-cyclohexene-1-carboxylate synthase (SEPHCHC synthase) (EC 2.2.1.9) (Menaquinone biosynthesis protein MenD) |

|     |     |      |            |                                     |                                                                                                         |
|-----|-----|------|------------|-------------------------------------|---------------------------------------------------------------------------------------------------------|
| 457 | 207 | 0.01 | N8VN75     | <i>Acinetobacter sp.</i>            | Uncharacterized protein                                                                                 |
| 458 | 206 | 0.01 | A0A0K0WVZ1 | <i>Litoditis aff. marina PmIV</i>   | NADH dehydrogenase subunit 2                                                                            |
| 459 | 206 | 0.01 | A0A0Q6W7U3 | <i>Pelomonas sp.</i>                | Uncharacterized protein                                                                                 |
| 460 | 206 | 0.01 | A0A0Q7S0T9 | <i>Pelomonas sp.</i>                | MFS transporter                                                                                         |
| 461 | 206 | 0.01 | A0A1E4AQS9 | <i>Chryseobacterium sp.</i>         | Uncharacterized protein                                                                                 |
| 462 | 206 | 0.01 | A0A1Q3RU69 | <i>Flavobacterium sp.</i>           | Glycosyl transferase family 2                                                                           |
| 463 | 206 | 0.01 | E4T5N8     | <i>Paludibacter propionici</i>      | UvrABC system protein A                                                                                 |
| 464 | 205 | 0.01 | A0A0Q6TH52 | <i>Pelomonas sp.</i>                | Uncharacterized protein                                                                                 |
| 465 | 205 | 0.01 | A0A1E4A4H6 | <i>Chryseobacterium sp.</i>         | Uncharacterized protein                                                                                 |
| 466 | 205 | 0.01 | A0A1E4A7Y4 | <i>Chryseobacterium sp.</i>         | Uncharacterized protein                                                                                 |
| 467 | 205 | 0.01 | A0A1Q3S6T7 | <i>Flavobacterium sp.</i>           | Cytochrome C                                                                                            |
| 468 | 205 | 0.01 | A0A1Q3SA51 | <i>Flavobacterium sp.</i>           | Gliding motility lipoprotein GldK                                                                       |
| 469 | 205 | 0.01 | A0A1Q3SAE9 | <i>Flavobacterium sp.</i>           | Penicillin-binding protein                                                                              |
| 470 | 205 | 0.01 | A0A1Q3SAG2 | <i>Flavobacterium sp.</i>           | Aminopeptidase                                                                                          |
| 471 | 205 | 0.01 | E4T592     | <i>Paludibacter propionici</i>      | Methionine synthase (B12-dependent) (EC 2.1.1.13)                                                       |
| 472 | 205 | 0.01 | P15689     | <i>Paramecium tetraurelia</i>       | NADH-ubiquinone oxidoreductase 49 kDa subunit (EC 1.6.5.3) (EC 1.6.99.3) (NADH dehydrogenase subunit 7) |
| 473 | 205 | 0.01 |            |                                     |                                                                                                         |
| 474 | 204 | 0.01 | A0A0Q7SJP7 | <i>Pelomonas sp.</i>                | Phosphoenolpyruvate carboxylase (PEPC) (PEPCase) (EC 4.1.1.31)                                          |
| 475 | 204 | 0.01 | T1KH75     | <i>Tetranychus urticae</i>          | Mitochondrial NADH-quinone oxidoreductase 49 kDa subunit (EC 1.6.5.11)                                  |
| 476 | 203 | 0.01 | A0A0Q6WW26 | <i>Pelomonas sp.</i>                | Uncharacterized protein                                                                                 |
| 477 | 203 | 0.01 | A0A0Q7SA36 | <i>Pelomonas sp.</i>                | Protein translocase subunit SecY                                                                        |
| 478 | 203 | 0.01 | A0A1E4ADB7 | <i>Chryseobacterium sp.</i>         | ATP-dependent RNA helicase                                                                              |
| 479 | 203 | 0.01 | A0A1J5HA84 | <i>Porphyromonadaceae bacterium</i> | Potassium transporter                                                                                   |
| 480 | 203 | 0.01 | A0A1M3M7V7 | <i>Paludibacter sp.</i>             | Carbamoyl-phosphate synthase (glutamine-hydrolyzing) (EC 6.3.5.5)                                       |
| 481 | 203 | 0.01 | A0A1Q3RTW4 | <i>Flavobacterium sp.</i>           | Two-component sensor histidine kinase                                                                   |
| 482 | 202 | 0.01 | A0A085EMB6 | <i>Flavobacterium gilvum</i>        | Uncharacterized protein                                                                                 |
| 483 | 202 | 0.01 | A0A0Q6U3Y0 | <i>Pelomonas sp.</i>                | Uncharacterized protein                                                                                 |
| 484 | 202 | 0.01 | A0A0Q8GKD4 | <i>Pelomonas sp.</i>                | Uncharacterized protein                                                                                 |
| 485 | 202 | 0.01 | A0A1E3ZYN2 | <i>Chryseobacterium sp.</i>         | Uncharacterized protein                                                                                 |
| 486 | 202 | 0.01 | A0A1E4ACN4 | <i>Chryseobacterium sp.</i>         | Peptidase S8                                                                                            |
| 487 | 202 | 0.01 | A0A1Q3S2M1 | <i>Flavobacterium sp.</i>           | Uncharacterized protein                                                                                 |
| 488 | 202 | 0.01 | A0A1Q3S6U3 | <i>Flavobacterium sp.</i>           | Gliding motility protein RemB                                                                           |
| 489 | 201 | 0.01 | A0A0Q6UIQ9 | <i>Pelomonas sp.</i>                | Histidine kinase (EC 2.7.13.3)                                                                          |
| 490 | 201 | 0.01 | A0A0Q8GXY5 | <i>Pelomonas sp.</i>                | Uncharacterized protein                                                                                 |

|     |     |      |            |                                     |                                                                    |
|-----|-----|------|------------|-------------------------------------|--------------------------------------------------------------------|
| 491 | 201 | 0.01 | A0A1E4A1F8 | <i>Chryseobacterium sp.</i>         | Cell division protein FtsZ                                         |
| 492 | 201 | 0.01 | A0A1E4AHA9 | <i>Chryseobacterium sp.</i>         | Glycerol acyltransferase                                           |
| 493 | 201 | 0.01 | A0A1J5HT60 | <i>Porphyromonadaceae bacterium</i> | DNA polymerase I (EC 2.7.7.7)                                      |
| 494 | 201 | 0.01 | A0A1J5HUI2 | <i>Porphyromonadaceae bacterium</i> | Cytochrome C oxidase assembly protein                              |
| 495 | 200 | 0.01 | A0A0Q7RYM2 | <i>Pelomonas sp.</i>                | Copper oxidase                                                     |
| 496 | 200 | 0.01 | A0A0Q7SCD2 | <i>Pelomonas sp.</i>                | Helicase                                                           |
| 497 | 200 | 0.01 | A0A0Q7SED5 | <i>Pelomonas sp.</i>                | Alanine--tRNA ligase (EC 6.1.1.7) (Alanyl-tRNA synthetase) (AlaRS) |
| 498 | 200 | 0.01 | A0A1E4A2L4 | <i>Chryseobacterium sp.</i>         | Flagellar motor protein MotB                                       |
| 499 | 200 | 0.01 | A0A1E4A659 | <i>Chryseobacterium sp.</i>         | Peptidase M61                                                      |
| 500 | 200 | 0.01 | A0A1Q3S7A3 | <i>Flavobacterium sp.</i>           | Endonuclease MutS2 (EC 3.1.-.-)                                    |

**Table S7.** Functional overview of M5A community (top 500 rank only).

| Rank | Count | Abundance | ID         | Organism                            | Protein Names                                      |
|------|-------|-----------|------------|-------------------------------------|----------------------------------------------------|
| 1    | 4376  | 0.14      | F4BUN6     | <i>Methanosaeta concilii</i>        | Transposase, IS116/IS110/IS902 family              |
| 2    | 3604  | 0.12      | F4BZD0     | <i>Methanosaeta concilii</i>        | Transposase, putative                              |
| 3    | 2697  | 0.09      | F4BY05     | <i>Methanosaeta concilii</i>        | Transposase, IS116/IS110/IS902 family              |
| 4    | 1997  | 0.07      | F4BY15     | <i>Methanosaeta concilii</i>        | Transposase, IS116/IS110/IS902 family              |
| 5    | 1995  | 0.07      | I9R3U4     | <i>Bacteroides cellulosilyticus</i> | Uncharacterized protein                            |
| 6    | 1977  | 0.07      | F4BSV9     | <i>Methanosaeta concilii</i>        | Transposase, IS4 family                            |
| 7    | 1641  | 0.05      | F4BZ63     | <i>Methanosaeta concilii</i>        | Transposase, IS4 family                            |
| 8    | 1506  | 0.05      | F4BSV1     | <i>Methanosaeta concilii</i>        | Transposase, IS4 family, putative                  |
| 9    | 1289  | 0.04      | F4BV05     | <i>Methanosaeta concilii</i>        | Transposase, Rhodopirellula family protein         |
| 10   | 1247  | 0.04      | F4BZW8     | <i>Methanosaeta concilii</i>        | Transposase, IS605 OrfB family                     |
| 11   | 1232  | 0.04      | F4BX44     | <i>Methanosaeta concilii</i>        | Transposase, IS605 OrfB family                     |
| 12   | 1164  | 0.04      | N8ZVC9     | <i>Acinetobacter gernerii</i>       | Uncharacterized protein                            |
| 13   | 1132  | 0.04      | F3ZQL8     | <i>Bacteroides coprosuis</i>        | Transposase IS4 family protein                     |
| 14   | 1125  | 0.04      | F4BYN0     | <i>Methanosaeta concilii</i>        | Transposase, IS605 OrfB family                     |
| 15   | 1124  | 0.04      | N8ZNX3     | <i>Acinetobacter gernerii</i>       | Uncharacterized protein                            |
| 16   | 1122  | 0.04      | F4BXC1     | <i>Methanosaeta concilii</i>        | Transposase, IS4                                   |
| 17   | 981   | 0.03      | F4BV83     | <i>Methanosaeta concilii</i>        | Uncharacterized protein                            |
| 18   | 916   | 0.03      | F4BUD0     | <i>Methanosaeta concilii</i>        | Conserved domain transposase IS605 family          |
| 19   | 872   | 0.03      | F4BVK0     | <i>Methanosaeta concilii</i>        | Transposase, IS116/IS110/IS902 family              |
| 20   | 803   | 0.03      |            |                                     |                                                    |
| 21   | 796   | 0.03      | F4C073     | <i>Methanosaeta concilii</i>        | Transposase, IS605 OrfB family                     |
| 22   | 780   | 0.03      | AOA0R3QEE4 | <i>Brugia timori</i>                | Uncharacterized protein                            |
| 23   | 738   | 0.02      | F4BZ72     | <i>Methanosaeta concilii</i>        | Uncharacterized protein                            |
| 24   | 729   | 0.02      | F4BTW8     | <i>Methanosaeta concilii</i>        | Transposase IS3 family protein, putative integrase |
| 25   | 716   | 0.02      | F4BUB6     | <i>Methanosaeta concilii</i>        | Transposase, IS605 OrfB family                     |
| 26   | 661   | 0.02      | F4BUL3     | <i>Methanosaeta concilii</i>        | Transposase                                        |
| 27   | 624   | 0.02      | H8MU17     | <i>Coralloccoccus coralloides</i>   | Long-chain-fatty-acid--CoA ligase                  |
| 28   | 608   | 0.02      |            |                                     |                                                    |
| 29   | 607   | 0.02      | AOA077XLW5 | <i>Sphinx1.76-related DNA</i>       | Replication protein                                |
| 30   | 592   | 0.02      | F4COV0     | <i>Methanosaeta concilii</i>        | Uncharacterized protein                            |
| 31   | 586   | 0.02      | F4BTV1     | <i>Methanosaeta concilii</i>        | Glycosyltransferase family 36 protein              |
| 32   | 578   | 0.02      | AOA1Q2CUJ4 | <i>Tessaracoccus flavescens</i>     | ISL3 family transposase                            |
| 33   | 570   | 0.02      | F4BZ82     | <i>Methanosaeta concilii</i>        | Cna B domain protein                               |

|    |     |      |            |                                    |                                                       |
|----|-----|------|------------|------------------------------------|-------------------------------------------------------|
| 34 | 555 | 0.02 | F4BV12     | <i>Methanosaeta concilii</i>       | Transposase, Mutator family                           |
| 35 | 549 | 0.02 | F4BTX0     | <i>Methanosaeta concilii</i>       | Conserved domain protein                              |
| 36 | 536 | 0.02 | A0A0T5YH86 | <i>Acinetobacter baumannii</i>     | Mobilization protein A                                |
| 37 | 534 | 0.02 | A0A1Q3QH52 | <i>Bacteroidia bacterium</i>       | Uncharacterized protein                               |
| 38 | 521 | 0.02 | F4BW50     | <i>Methanosaeta concilii</i>       | Transposase, IS605 OrfB family domain protein         |
| 39 | 520 | 0.02 | F4BT92     | <i>Methanosaeta concilii</i>       | Transposase, Mutator family                           |
| 40 | 513 | 0.02 | A0A077XNB6 | <i>Sphinx1.76-related DNA</i>      | Replication protein                                   |
| 41 | 505 | 0.02 | A0A1Q3QCL0 | <i>Bacteroidia bacterium</i>       | Uncharacterized protein                               |
| 42 | 504 | 0.02 | G9FB24     | <i>uncultured bacterium</i>        | IS21 family transposition protein                     |
| 43 | 501 | 0.02 | H8MYX7     | <i>Corallococcus coralloides</i>   | Non-ribosomal peptide synthetase/polyketide synthase  |
| 44 | 487 | 0.02 |            |                                    |                                                       |
| 45 | 483 | 0.02 | A0A1Q3QJR2 | <i>Bacteroidia bacterium</i>       | Cell surface protein SprA                             |
| 46 | 482 | 0.02 |            |                                    |                                                       |
| 47 | 481 | 0.02 |            |                                    |                                                       |
| 48 | 478 | 0.02 | F4BW44     | <i>Methanosaeta concilii</i>       | Transposase, IS605 OrfB family                        |
| 49 | 469 | 0.02 | A0A178FWP5 | <i>Acinetobacter sp. SFC</i>       | Transposase                                           |
| 50 | 466 | 0.02 | F4BV10     | <i>Methanosaeta concilii</i>       | Methyltransferase/glycosyl transferase fusion protein |
| 51 | 437 | 0.01 | F4BXD7     | <i>Methanosaeta concilii</i>       | Transposase, IS4 (Transposase, IS4 family)            |
| 52 | 426 | 0.01 | A0A1M7BMK5 | <i>Fibrobacter sp. UWEL</i>        | Transposase InsO and inactivated derivatives          |
| 53 | 423 | 0.01 |            |                                    |                                                       |
| 54 | 418 | 0.01 |            |                                    |                                                       |
| 55 | 417 | 0.01 | N8QHE7     | <i>Acinetobacter bohemicus</i>     | Uncharacterized protein                               |
| 56 | 414 | 0.01 | A0A1Q3QC75 | <i>Bacteroidia bacterium</i>       | Uncharacterized protein                               |
| 57 | 409 | 0.01 |            |                                    |                                                       |
| 58 | 408 | 0.01 |            |                                    |                                                       |
| 59 | 405 | 0.01 | U6RUP9     | <i>Bacteroides sp. HPS0048</i>     | Uncharacterized protein                               |
| 60 | 405 | 0.01 |            |                                    |                                                       |
| 61 | 402 | 0.01 |            |                                    |                                                       |
| 62 | 401 | 0.01 |            |                                    |                                                       |
| 63 | 399 | 0.01 | F4BUA5     | <i>Methanosaeta concilii</i>       | Transposase, IS605 OrfB family                        |
| 64 | 393 | 0.01 |            |                                    |                                                       |
| 65 | 384 | 0.01 | A0A1Q3QBX8 | <i>Bacteroidia bacterium</i>       | Uncharacterized protein                               |
| 66 | 383 | 0.01 | F4BUD1     | <i>Methanosaeta concilii</i>       | Transposase, putative                                 |
| 67 | 380 | 0.01 |            |                                    |                                                       |
| 68 | 379 | 0.01 | A0A1Q3QGY6 | <i>Bacteroidia bacterium</i>       | Hybrid sensor histidine kinase/response regulator     |
| 69 | 374 | 0.01 | I2F7Y4     | <i>Mesotoga prima MesG1.Ag.4.2</i> | Retron-type reverse transcriptase                     |

|     |     |      |            |                                   |                                                                         |
|-----|-----|------|------------|-----------------------------------|-------------------------------------------------------------------------|
| 70  | 370 | 0.01 | T5L8A5     | <i>Microbacterium maritypicum</i> | Uncharacterized protein                                                 |
| 71  | 361 | 0.01 | H8MN58     | <i>Corallococcus coralloides</i>  | Long-chain-fatty-acid--CoA ligase                                       |
| 72  | 356 | 0.01 | A0A1Q3QI02 | <i>Bacteroidia bacterium</i>      | Uncharacterized protein                                                 |
| 73  | 355 | 0.01 | F4BXC2     | <i>Methanosaeta concilii</i>      | Transposase IS200-like protein (Transposase, IS200-like, putative MITE) |
| 74  | 355 | 0.01 | F4BY39     | <i>Methanosaeta concilii</i>      | Transposase, IS605 OrfB family                                          |
| 75  | 351 | 0.01 | A0A0C5RZ24 | <i>Pseudomonas putida</i>         | Adhesin                                                                 |
| 76  | 351 | 0.01 |            |                                   |                                                                         |
| 77  | 348 | 0.01 | F3ZQK5     | <i>Bacteroides coprosuis</i>      | Transposase IS4 family protein                                          |
| 78  | 348 | 0.01 | F4BYV3     | <i>Methanosaeta concilii</i>      | Riboflavin biosynthesis protein RibD C-domain protein                   |
| 79  | 346 | 0.01 |            |                                   |                                                                         |
| 80  | 345 | 0.01 | G9FB23     | <i>uncultured bacterium</i>       | IS21 family transposition protein                                       |
| 81  | 345 | 0.01 |            |                                   |                                                                         |
| 82  | 342 | 0.01 | F4BZ39     | <i>Methanosaeta concilii</i>      | Transposase, IS116/IS110/IS902 family                                   |
| 83  | 340 | 0.01 | A0A1M6CDY9 | <i>Tessaracoccus bendigoensis</i> | Cd2+/Zn2+-exporting ATPase                                              |
| 84  | 336 | 0.01 | F4BXE4     | <i>Methanosaeta concilii</i>      | Conserved domain, transposase IS3 family protein, putative integrase    |
| 85  | 336 | 0.01 |            |                                   |                                                                         |
| 86  | 332 | 0.01 |            |                                   |                                                                         |
| 87  | 331 | 0.01 | N8P3X5     | <i>Acinetobacter bohemicus</i>    | Uncharacterized protein                                                 |
| 88  | 330 | 0.01 |            |                                   |                                                                         |
| 89  | 329 | 0.01 | F4BXF6     | <i>Methanosaeta concilii</i>      | Uncharacterized protein                                                 |
| 90  | 327 | 0.01 | A0A1Q3QHS9 | <i>Bacteroidia bacterium</i>      | Uncharacterized protein                                                 |
| 91  | 322 | 0.01 | H8MSC6     | <i>Corallococcus coralloides</i>  | Non-ribosomal peptide synthetase                                        |
| 92  | 321 | 0.01 |            |                                   |                                                                         |
| 93  | 320 | 0.01 |            |                                   |                                                                         |
| 94  | 314 | 0.01 | F4BVL8     | <i>Methanosaeta concilii</i>      | Uncharacterized protein                                                 |
| 95  | 313 | 0.01 |            |                                   |                                                                         |
| 96  | 311 | 0.01 | F4BZ62     | <i>Methanosaeta concilii</i>      | Conserved domain protein                                                |
| 97  | 307 | 0.01 | A0A1Q3QCN8 | <i>Bacteroidia bacterium</i>      | Uncharacterized protein                                                 |
| 98  | 307 | 0.01 | A0A1Q3QIV6 | <i>Bacteroidia bacterium</i>      | Uncharacterized protein                                                 |
| 99  | 307 | 0.01 | N8YFI4     | <i>Acinetobacter gernerii</i>     | Uncharacterized protein                                                 |
| 100 | 305 | 0.01 |            |                                   |                                                                         |
| 101 | 304 | 0.01 | A0A1Q3QBE7 | <i>Bacteroidia bacterium</i>      | Uncharacterized protein                                                 |
| 102 | 302 | 0.01 | F4BVN9     | <i>Methanosaeta concilii</i>      | Conserved repeat domain protein                                         |
| 103 | 301 | 0.01 | N9GC16     | <i>Acinetobacter lwoffii</i>      | Uncharacterized protein                                                 |
| 104 | 300 | 0.01 | F4BTW7     | <i>Methanosaeta concilii</i>      | Conserved domain protein                                                |
| 105 | 297 | 0.01 | A0A1Q3QDS6 | <i>Bacteroidia bacterium</i>      | Uncharacterized protein                                                 |



|     |     |      |            |                               |                                                     |
|-----|-----|------|------------|-------------------------------|-----------------------------------------------------|
| 106 | 297 | 0.01 | F4BUE8     | <i>Methanosaeta concilii</i>  | Transposase, predicted                              |
| 107 | 291 | 0.01 | A0A1Q3QH6  | <i>Bacteroidia bacterium</i>  | Multidrug transporter AcrB                          |
| 108 | 290 | 0.01 |            |                               |                                                     |
| 109 | 289 | 0.01 |            |                               |                                                     |
| 110 | 288 | 0.01 | A0A1Q3QI54 | <i>Bacteroidia bacterium</i>  | SusC/RagA family TonB-linked outer membrane protein |
| 111 | 287 | 0.01 | F4BVK5     | <i>Methanosaeta concilii</i>  | Transposase                                         |
| 112 | 284 | 0.01 | F4BX50     | <i>Methanosaeta concilii</i>  | Type III restriction enzyme, res subunit            |
| 113 | 284 | 0.01 |            |                               |                                                     |
| 114 | 283 | 0.01 | D2E402     | <i>Kernia pachypleura</i>     | Ribosomal protein 3                                 |
| 115 | 283 | 0.01 |            |                               |                                                     |
| 116 | 282 | 0.01 |            |                               |                                                     |
| 117 | 281 | 0.01 | A0A0W8FAI0 | <i>hydrocarbon metagenome</i> | Uncharacterized protein                             |
| 118 | 281 | 0.01 | A0A1Q3QIY4 | <i>Bacteroidia bacterium</i>  | SusC/RagA family protein                            |
| 119 | 279 | 0.01 | A0A1Q3QGJ2 | <i>Bacteroidia bacterium</i>  | Uncharacterized protein                             |
| 120 | 278 | 0.01 |            |                               |                                                     |
| 121 | 277 | 0.01 |            |                               |                                                     |
| 122 | 276 | 0.01 | N8YF58     | <i>Acinetobacter gernerii</i> | Uncharacterized protein                             |
| 123 | 276 | 0.01 |            |                               |                                                     |
| 124 | 276 | 0.01 |            |                               |                                                     |
| 125 | 275 | 0.01 | A0A1Q3QB47 | <i>Bacteroidia bacterium</i>  | Deoxyribonuclease HsdR                              |
| 126 | 274 | 0.01 | F4BU67     | <i>Methanosaeta concilii</i>  | Multi-sensor hybrid histidine kinase                |
| 127 | 272 | 0.01 | F4BT93     | <i>Methanosaeta concilii</i>  | Uncharacterized protein                             |
| 128 | 272 | 0.01 |            |                               |                                                     |
| 129 | 271 | 0.01 |            |                               |                                                     |
| 130 | 271 | 0.01 |            |                               |                                                     |
| 131 | 269 | 0.01 |            |                               |                                                     |
| 132 | 268 | 0.01 |            |                               |                                                     |
| 133 | 267 | 0.01 |            |                               |                                                     |
| 134 | 267 | 0.01 |            |                               |                                                     |
| 135 | 266 | 0.01 | F4BXN8     | <i>Methanosaeta concilii</i>  | CobN/magnesium chelatase domain protein             |
| 136 | 266 | 0.01 |            |                               |                                                     |
| 137 | 265 | 0.01 |            |                               |                                                     |
| 138 | 263 | 0.01 | A0A1Q3QF20 | <i>Bacteroidia bacterium</i>  | SusC/RagA family protein                            |
| 139 | 263 | 0.01 | A0A1Q3QI16 | <i>Bacteroidia bacterium</i>  | SusC/RagA family TonB-linked outer membrane protein |
| 140 | 262 | 0.01 | A0A1Q3QH94 | <i>Bacteroidia bacterium</i>  | DNA-directed DNA polymerase (EC 2.7.7.7)            |
| 141 | 262 | 0.01 |            |                               |                                                     |

|     |     |      |            |                                   |                                                                                                                                                                        |
|-----|-----|------|------------|-----------------------------------|------------------------------------------------------------------------------------------------------------------------------------------------------------------------|
| 142 | 262 | 0.01 |            |                                   |                                                                                                                                                                        |
| 143 | 262 | 0.01 |            |                                   |                                                                                                                                                                        |
| 144 | 261 | 0.01 |            |                                   |                                                                                                                                                                        |
| 145 | 260 | 0.01 | F4BXH3     | <i>Methanosaeta concilii</i>      | Cobaltochelataase, CobN subunit                                                                                                                                        |
| 146 | 259 | 0.01 | A0A1Q3QIK1 | <i>Bacteroidia bacterium</i>      | Phosphoribosylformylglycinamide synthase (FGAM synthase) (FGAMS) (EC 6.3.5.3)<br>(Formylglycinamide ribonucleotide amidotransferase) (FGAR amidotransferase) (FGAR-AT) |
| 147 | 257 | 0.01 | A0A1Q3Q9Q2 | <i>Bacteroidia bacterium</i>      | SusC/RagA family protein                                                                                                                                               |
| 148 | 257 | 0.01 | F4BT87     | <i>Methanosaeta concilii</i>      | TPR-repeat protein                                                                                                                                                     |
| 149 | 257 | 0.01 | F4BXG6     | <i>Methanosaeta concilii</i>      | Cobaltochelataase, CobN subunit (EC 6.6.1.2)                                                                                                                           |
| 150 | 256 | 0.01 |            |                                   |                                                                                                                                                                        |
| 151 | 253 | 0.01 | A0A1Q3QAN2 | <i>Bacteroidia bacterium</i>      | SusC/RagA family TonB-linked outer membrane protein                                                                                                                    |
| 152 | 251 | 0.01 | A0A1Q3Q9V3 | <i>Bacteroidia bacterium</i>      | Peptidase S9                                                                                                                                                           |
| 153 | 249 | 0.01 | A0A1M6CCR6 | <i>Tessaracoccus bendigoensis</i> | Uncharacterized protein                                                                                                                                                |
| 154 | 249 | 0.01 | A0A1Q3QA74 | <i>Bacteroidia bacterium</i>      | TonB-dependent receptor                                                                                                                                                |
| 155 | 248 | 0.01 | H8MS99     | <i>Coralloccoccus coralloides</i> | Adventurous gliding motility protein AgmK                                                                                                                              |
| 156 | 247 | 0.01 | A0A1Q3QBC6 | <i>Bacteroidia bacterium</i>      | Uncharacterized protein                                                                                                                                                |
| 157 | 247 | 0.01 | A0A1Q3QE63 | <i>Bacteroidia bacterium</i>      | Uncharacterized protein                                                                                                                                                |
| 158 | 245 | 0.01 | A0A077XLZ7 | <i>Sphinx1.76-related DNA</i>     | Replication protein                                                                                                                                                    |
| 159 | 245 | 0.01 | A0A1Q3QF86 | <i>Bacteroidia bacterium</i>      | Multidrug transporter AcrB                                                                                                                                             |
| 160 | 244 | 0.01 | F4C043     | <i>Methanosaeta concilii</i>      | Membrane protein, putative                                                                                                                                             |
| 161 | 243 | 0.01 | A0A1G4G9S9 | <i>Petrimonas mucosa</i>          | TonB-dependent receptor SusC                                                                                                                                           |
| 162 | 243 | 0.01 | A0A1Q3QGM8 | <i>Bacteroidia bacterium</i>      | SusC/RagA family TonB-linked outer membrane protein                                                                                                                    |
| 163 | 243 | 0.01 | F4BV15     | <i>Methanosaeta concilii</i>      | Transposase, IS605 OrfB family                                                                                                                                         |
| 164 | 243 | 0.01 |            |                                   |                                                                                                                                                                        |
| 165 | 242 | 0.01 | A0A1Q3QAH7 | <i>Bacteroidia bacterium</i>      | DNA polymerase I (EC 2.7.7.7)                                                                                                                                          |
| 166 | 242 | 0.01 | A0A1Q3QDC9 | <i>Bacteroidia bacterium</i>      | SusC/RagA family TonB-linked outer membrane protein                                                                                                                    |
| 167 | 242 | 0.01 |            |                                   |                                                                                                                                                                        |
| 168 | 241 | 0.01 | F4BWZ9     | <i>Methanosaeta concilii</i>      | Two-component hybrid sensor and regulator                                                                                                                              |
| 169 | 240 | 0.01 | A0A1Q3QBL0 | <i>Bacteroidia bacterium</i>      | Acridine resistance protein B                                                                                                                                          |
| 170 | 240 | 0.01 | A0A1Q3QD12 | <i>Bacteroidia bacterium</i>      | SusC/RagA family TonB-linked outer membrane protein                                                                                                                    |
| 171 | 240 | 0.01 |            |                                   |                                                                                                                                                                        |
| 172 | 239 | 0.01 | A0A1Q3QFV8 | <i>Bacteroidia bacterium</i>      | DNA helicase (EC 3.6.4.12)                                                                                                                                             |
| 173 | 239 | 0.01 | F4BUA4     | <i>Methanosaeta concilii</i>      | Transposase, IS605 OrfB family                                                                                                                                         |
| 174 | 238 | 0.01 | F4BTN1     | <i>Methanosaeta concilii</i>      | Two-component hybrid sensor and regulator                                                                                                                              |
| 175 | 238 | 0.01 |            |                                   |                                                                                                                                                                        |
| 176 | 238 | 0.01 |            |                                   |                                                                                                                                                                        |

|     |     |      |            |                                          |                                                                                                                     |
|-----|-----|------|------------|------------------------------------------|---------------------------------------------------------------------------------------------------------------------|
| 177 | 237 | 0.01 | AOA1R3TE89 | <i>Proteiniphilum saccharofermentans</i> | Uncharacterized protein                                                                                             |
| 178 | 237 | 0.01 | F4COL1     | <i>Methanosaeta concilii</i>             | TPR-repeat protein                                                                                                  |
| 179 | 236 | 0.01 |            |                                          |                                                                                                                     |
| 180 | 235 | 0.01 | A0A0N1L384 | <i>Novosphingobium sp.</i>               | Glutamate dehydrogenase                                                                                             |
| 181 | 235 | 0.01 | A0A1Q3QG05 | <i>Bacteroidia bacterium</i>             | Multifunctional fusion protein [Includes: Protein translocase subunit SecD; Protein-export membrane protein SecF]   |
| 182 | 234 | 0.01 | A0A1M6CDN2 | <i>Tessaracoccus bendigoensis</i>        | Multicopper oxidase with three cupredoxin domains (Includes cell division protein FtsP and spore coat protein CotA) |
| 183 | 234 | 0.01 | A0A1Q3QCP4 | <i>Bacteroidia bacterium</i>             | SusC/RagA family TonB-linked outer membrane protein                                                                 |
| 184 | 234 | 0.01 |            |                                          |                                                                                                                     |
| 185 | 233 | 0.01 | F4BY67     | <i>Methanosaeta concilii</i>             | Uncharacterized protein                                                                                             |
| 186 | 232 | 0.01 |            |                                          |                                                                                                                     |
| 187 | 231 | 0.01 | F4BXB3     | <i>Methanosaeta concilii</i>             | Transposase, IS605 family protein, putative MITE                                                                    |
| 188 | 231 | 0.01 |            |                                          |                                                                                                                     |
| 189 | 231 | 0.01 |            |                                          |                                                                                                                     |
| 190 | 230 | 0.01 | F4BWV9     | <i>Methanosaeta concilii</i>             | S-layer-related duplication domain protein                                                                          |
| 191 | 230 | 0.01 |            |                                          |                                                                                                                     |
| 192 | 228 | 0.01 | A0A1Q3QGP0 | <i>Bacteroidia bacterium</i>             | Glycosyl hydrolase family 35                                                                                        |
| 193 | 228 | 0.01 |            |                                          |                                                                                                                     |
| 194 | 228 | 0.01 |            |                                          |                                                                                                                     |
| 195 | 226 | 0.01 | F4BVL9     | <i>Methanosaeta concilii</i>             | Uncharacterized protein                                                                                             |
| 196 | 226 | 0.01 |            |                                          |                                                                                                                     |
| 197 | 225 | 0.01 |            |                                          |                                                                                                                     |
| 198 | 225 | 0.01 |            |                                          |                                                                                                                     |
| 199 | 224 | 0.01 |            |                                          |                                                                                                                     |
| 200 | 224 | 0.01 |            |                                          |                                                                                                                     |
| 201 | 223 | 0.01 | A0A1Q3QI74 | <i>Bacteroidia bacterium</i>             | Peptidase M16                                                                                                       |
| 202 | 223 | 0.01 | A0A1Q3QIQ0 | <i>Bacteroidia bacterium</i>             | Uncharacterized protein                                                                                             |
| 203 | 223 | 0.01 |            |                                          |                                                                                                                     |
| 204 | 222 | 0.01 | A0A1Q3QBF6 | <i>Bacteroidia bacterium</i>             | SusC/RagA family protein                                                                                            |
| 205 | 222 | 0.01 | A0A1Q3QDK9 | <i>Bacteroidia bacterium</i>             | Uncharacterized protein                                                                                             |
| 206 | 222 | 0.01 | A0A1Q3QJE6 | <i>Bacteroidia bacterium</i>             | Cation transporter                                                                                                  |
| 207 | 222 | 0.01 |            |                                          |                                                                                                                     |
| 208 | 222 | 0.01 |            |                                          |                                                                                                                     |
| 209 | 221 | 0.01 | A0A1Q3QD11 | <i>Bacteroidia bacterium</i>             | SusC/RagA family protein                                                                                            |

|     |     |      |            |                                        |                                                                          |
|-----|-----|------|------------|----------------------------------------|--------------------------------------------------------------------------|
| 210 | 220 | 0.01 | A0A1Q3QGR5 | <i>Bacteroidia bacterium</i>           | SusC/RagA family TonB-linked outer membrane protein                      |
| 211 | 220 | 0.01 | F1Z681     | <i>Novosphingobium nitrogenifigens</i> | Type I site-specific deoxyribonuclease, HsdR family                      |
| 212 | 220 | 0.01 | F4BSZ2     | <i>Methanosaeta concilii</i>           | Oligosaccharyl transferase STT3 subunit                                  |
| 213 | 220 | 0.01 | F4BVN7     | <i>Methanosaeta concilii</i>           | Pentapeptide repeat protein                                              |
| 214 | 220 | 0.01 | F4C050     | <i>Methanosaeta concilii</i>           | Asparagine synthase (Glutamine-hydrolyzing) (EC 6.3.5.4)                 |
| 215 | 220 | 0.01 |            |                                        |                                                                          |
| 216 | 219 | 0.01 | A0A1Q3Q9V2 | <i>Bacteroidia bacterium</i>           | Phosphate transporter                                                    |
| 217 | 219 | 0.01 | A0A1Q3QFQ4 | <i>Bacteroidia bacterium</i>           | Uncharacterized protein                                                  |
| 218 | 219 | 0.01 | F4BVI9     | <i>Methanosaeta concilii</i>           | IS3/IS66 family element, Orf1 protein                                    |
| 219 | 219 | 0.01 |            |                                        |                                                                          |
| 220 | 218 | 0.01 | A0A0W8FC74 | <i>hydrocarbon metagenome</i>          | Sensor histidine kinase                                                  |
| 221 | 218 | 0.01 | F1ZDD0     | <i>Novosphingobium nitrogenifigens</i> | Penicillin amidase family protein                                        |
| 222 | 218 | 0.01 | F4BZ35     | <i>Methanosaeta concilii</i>           | Uncharacterized protein                                                  |
| 223 | 218 | 0.01 |            |                                        |                                                                          |
| 224 | 218 | 0.01 |            |                                        |                                                                          |
| 225 | 218 | 0.01 |            |                                        |                                                                          |
| 226 | 218 | 0.01 |            |                                        |                                                                          |
| 227 | 217 | 0.01 | A0A1Q3QAI6 | <i>Bacteroidia bacterium</i>           | Uncharacterized protein                                                  |
| 228 | 217 | 0.01 | F4BSW7     | <i>Methanosaeta concilii</i>           | Multi-sensor hybrid histidine kinase                                     |
| 229 | 217 | 0.01 | F4BW20     | <i>Methanosaeta concilii</i>           | Glycosyl transferase group 2/group 1 fusion protein                      |
| 230 | 217 | 0.01 |            |                                        |                                                                          |
| 231 | 216 | 0.01 | A0A1Q3QBY0 | <i>Bacteroidia bacterium</i>           | Phosphoenolpyruvate synthase                                             |
| 232 | 216 | 0.01 | A0A1Q3QCR5 | <i>Bacteroidia bacterium</i>           | Isoleucine--tRNA ligase (EC 6.1.1.5) (Isoleucyl-tRNA synthetase) (IleRS) |
| 233 | 216 | 0.01 | F4BXZ6     | <i>Methanosaeta concilii</i>           | S-layer-related duplication domain protein                               |
| 234 | 216 | 0.01 |            |                                        |                                                                          |
| 235 | 216 | 0.01 |            |                                        |                                                                          |
| 236 | 216 | 0.01 |            |                                        |                                                                          |
| 237 | 215 | 0.01 | A0A0FOLYK2 | <i>Microbacterium ginsengisoli</i>     | Putative cadmium-transporting ATPase (EC 3.6.3.3)                        |
| 238 | 215 | 0.01 | A0A1Q3QJ62 | <i>Bacteroidia bacterium</i>           | Uncharacterized protein (Fragment)                                       |
| 239 | 215 | 0.01 |            |                                        |                                                                          |
| 240 | 214 | 0.01 | A0A1Q3QAN0 | <i>Bacteroidia bacterium</i>           | Uncharacterized protein                                                  |
| 241 | 214 | 0.01 |            |                                        |                                                                          |
| 242 | 214 | 0.01 |            |                                        |                                                                          |
| 243 | 214 | 0.01 |            |                                        |                                                                          |
| 244 | 213 | 0.01 | A0A1Q3Q9W7 | <i>Bacteroidia bacterium</i>           | Uncharacterized protein                                                  |
| 245 | 213 | 0.01 | A0A1Q3QED9 | <i>Bacteroidia bacterium</i>           | Uncharacterized protein                                                  |

|     |     |      |            |                                                                                                                                           |                                                     |
|-----|-----|------|------------|-------------------------------------------------------------------------------------------------------------------------------------------|-----------------------------------------------------|
| 246 | 213 | 0.01 | A0A1Q3QGE6 | <i>Bacteroidia bacterium</i>                                                                                                              | Uncharacterized protein                             |
| 247 | 213 | 0.01 | A0A1Q3QGG2 | <i>Bacteroidia bacterium</i>                                                                                                              | SusC/RagA family protein                            |
| 248 | 213 | 0.01 |            |                                                                                                                                           |                                                     |
| 249 | 212 | 0.01 | A0A1Q3QDG3 | <i>Bacteroidia bacterium</i>                                                                                                              | SusC/RagA family TonB-linked outer membrane protein |
| 250 | 212 | 0.01 | F0M3U0     | <i>Pseudarthrobacter phenanthrenivorans</i> (strain DSM 18606 / JCM 16027 / LMG 23796 / Sphe3) ( <i>Arthrobacter phenanthrenivorans</i> ) | Phospholipase/Carboxylesterase                      |
| 251 | 212 | 0.01 |            |                                                                                                                                           |                                                     |
| 252 | 211 | 0.01 | A0A1Q3QC05 | <i>Bacteroidia bacterium</i>                                                                                                              | Uncharacterized protein                             |
| 253 | 211 | 0.01 | A0A1Q3QES6 | <i>Bacteroidia bacterium</i>                                                                                                              | Uncharacterized protein                             |
| 254 | 211 | 0.01 | F4BXL6     | <i>Methanosaeta concilii</i>                                                                                                              | Conserved domain protein                            |
| 255 | 211 | 0.01 |            |                                                                                                                                           |                                                     |
| 256 | 211 | 0.01 |            |                                                                                                                                           |                                                     |
| 257 | 211 | 0.01 |            |                                                                                                                                           |                                                     |
| 258 | 210 | 0.01 | A0A0Q7S8L4 | <i>Pelomonas sp.</i>                                                                                                                      | Transposase                                         |
| 259 | 210 | 0.01 | A0A1Q3QCH6 | <i>Bacteroidia bacterium</i>                                                                                                              | Nitrate reductase subunit alpha                     |
| 260 | 210 | 0.01 | A0A1Q3QFU6 | <i>Bacteroidia bacterium</i>                                                                                                              | TonB-dependent receptor                             |
| 261 | 210 | 0.01 |            |                                                                                                                                           |                                                     |
| 262 | 210 | 0.01 |            |                                                                                                                                           |                                                     |
| 263 | 209 | 0.01 |            |                                                                                                                                           |                                                     |
| 264 | 209 | 0.01 |            |                                                                                                                                           |                                                     |
| 265 | 208 | 0.01 | A0A0N1ANW5 | <i>Novosphingobium sp.</i>                                                                                                                | Cellulose synthase                                  |
| 266 | 208 | 0.01 | A0A1Q3QAN4 | <i>Bacteroidia bacterium</i>                                                                                                              | Uncharacterized protein                             |
| 267 | 208 | 0.01 | F4BXF7     | <i>Methanosaeta concilii</i>                                                                                                              | Transposase, putative integrase                     |
| 268 | 208 | 0.01 |            |                                                                                                                                           |                                                     |
| 269 | 207 | 0.01 | A0A1Q3QIQ9 | <i>Bacteroidia bacterium</i>                                                                                                              | Uncharacterized protein                             |
| 270 | 207 | 0.01 | F4BYM4     | <i>Methanosaeta concilii</i>                                                                                                              | Chromosome partition protein Smc                    |
| 271 | 207 | 0.01 |            |                                                                                                                                           |                                                     |
| 272 | 207 | 0.01 |            |                                                                                                                                           |                                                     |
| 273 | 206 | 0.01 | A0A1Q3QIR5 | <i>Bacteroidia bacterium</i>                                                                                                              | Alpha-glucan phosphorylase                          |
| 274 | 206 | 0.01 | A0A1Q3QJ29 | <i>Bacteroidia bacterium</i>                                                                                                              | DNA mismatch repair protein MutS                    |
| 275 | 205 | 0.01 | H8MFD7     | <i>Corallococcus coralloides</i>                                                                                                          | Long-chain-fatty-acid--CoA ligase                   |
| 276 | 205 | 0.01 | L7LGQ0     | <i>Gordonia sihwensis</i>                                                                                                                 | Putative non-ribosomal peptide synthetase           |
| 277 | 205 | 0.01 |            |                                                                                                                                           |                                                     |

|     |     |      |            |                                          |                                                                                                      |
|-----|-----|------|------------|------------------------------------------|------------------------------------------------------------------------------------------------------|
| 278 | 205 | 0.01 |            |                                          |                                                                                                      |
| 279 | 204 | 0.01 |            |                                          |                                                                                                      |
| 280 | 204 | 0.01 |            |                                          |                                                                                                      |
| 281 | 203 | 0.01 | A0A1G4GAX8 | <i>Petrimonas mucosa</i>                 | Uncharacterized protein                                                                              |
| 282 | 203 | 0.01 | A0A1Q3QDL1 | <i>Bacteroidia bacterium</i>             | Methionine synthase                                                                                  |
| 283 | 203 | 0.01 | P11408     | <i>Moraxella sp.</i>                     | Modification methylase Mspl (M.Mspl) (EC 2.1.1.37) (Cytosine-specific methyltransferase Mspl)        |
| 284 | 203 | 0.01 |            |                                          |                                                                                                      |
| 285 | 202 | 0.01 |            |                                          |                                                                                                      |
| 286 | 202 | 0.01 |            |                                          |                                                                                                      |
| 287 | 201 | 0.01 | F4BY50     | <i>Methanosaeta concilii</i>             | ATP-dependent RNA helicase, putative                                                                 |
| 288 | 201 | 0.01 |            |                                          |                                                                                                      |
| 289 | 201 | 0.01 |            |                                          |                                                                                                      |
| 290 | 201 | 0.01 |            |                                          |                                                                                                      |
| 291 | 200 | 0.01 | F4BWJ6     | <i>Methanosaeta concilii</i>             | Peptidase families S8 and S53 protein                                                                |
| 292 | 200 | 0.01 | F4BWT2     | <i>Methanosaeta concilii</i>             | DNA polymerase (EC 2.7.7.7)                                                                          |
| 293 | 200 | 0.01 | F5XPC2     | <i>Microlunatus phosphovoros</i>         | Uncharacterized protein                                                                              |
| 294 | 200 | 0.01 |            |                                          |                                                                                                      |
| 295 | 199 | 0.01 | A0A1Q3QB44 | <i>Bacteroidia bacterium</i>             | Uncharacterized protein                                                                              |
| 296 | 199 | 0.01 | A0A1Q3QBJ9 | <i>Bacteroidia bacterium</i>             | Uncharacterized protein                                                                              |
| 297 | 199 | 0.01 | A0A1R3T512 | <i>Proteiniphilum saccharofermentans</i> | TonB-linked outer membrane protein, SusC/RagA family                                                 |
| 298 | 199 | 0.01 | D8L7S1     | <i>Paramecium caudatum</i>               | NADH-ubiquinone oxidoreductase chain 5 (EC 1.6.5.3)                                                  |
| 299 | 198 | 0.01 | A0A0R3R918 | <i>Brugia timori</i>                     | Uncharacterized protein                                                                              |
| 300 | 198 | 0.01 | F4BZ75     | <i>Methanosaeta concilii</i>             | Carbamoyl-phosphate synthase large chain (EC 6.3.5.5) (Carbamoyl-phosphate synthetase ammonia chain) |
| 301 | 198 | 0.01 | S2WV93     | <i>Delftia acidovorans</i>               | Uncharacterized protein                                                                              |
| 302 | 198 | 0.01 |            |                                          |                                                                                                      |
| 303 | 197 | 0.01 |            |                                          |                                                                                                      |
| 304 | 197 | 0.01 |            |                                          |                                                                                                      |
| 305 | 196 | 0.01 | F4BU15     | <i>Methanosaeta concilii</i>             | DNA mismatch repair protein MutS                                                                     |
| 306 | 196 | 0.01 | F5XPA1     | <i>Microlunatus phosphovoros</i>         | Uncharacterized protein                                                                              |
| 307 | 196 | 0.01 |            |                                          |                                                                                                      |
| 308 | 195 | 0.01 | A0A1Q3Q9V6 | <i>Bacteroidia bacterium</i>             | Multidrug transporter AcrB                                                                           |
| 309 | 195 | 0.01 | A0A1Q3QF64 | <i>Bacteroidia bacterium</i>             | Alpha-rhamnosidase                                                                                   |
| 310 | 195 | 0.01 | U6RCL0     | <i>Bacteroides sp.</i>                   | Uncharacterized protein                                                                              |
| 311 | 195 | 0.01 |            |                                          |                                                                                                      |

|     |     |      |            |                                   |                                            |
|-----|-----|------|------------|-----------------------------------|--------------------------------------------|
| 312 | 194 | 0.01 | A0A1Q3QED5 | <i>Bacteroidia bacterium</i>      | Multidrug transporter AcrB                 |
| 313 | 194 | 0.01 | A0A1Q3QF91 | <i>Bacteroidia bacterium</i>      | Alpha-rhamnosidase                         |
| 314 | 194 | 0.01 | A0A1Q3QJP8 | <i>Bacteroidia bacterium</i>      | Cytochrome C biogenesis protein            |
| 315 | 194 | 0.01 |            |                                   |                                            |
| 316 | 193 | 0.01 | A0A1Q3QGG1 | <i>Bacteroidia bacterium</i>      | Uncharacterized protein                    |
| 317 | 193 | 0.01 | A0A1Q3QIS8 | <i>Bacteroidia bacterium</i>      | NADH dehydrogenase                         |
| 318 | 193 | 0.01 | F4BVD8     | <i>Methanosaeta concilii</i>      | Cation transporting P-type ATPase          |
| 319 | 193 | 0.01 | F4BVJ1     | <i>Methanosaeta concilii</i>      | Beta-propeller repeat protein              |
| 320 | 193 | 0.01 |            |                                   |                                            |
| 321 | 192 | 0.01 | A0A1Q3QFG4 | <i>Bacteroidia bacterium</i>      | Alpha-galactosidase                        |
| 322 | 192 | 0.01 | A0A1Q3QFT2 | <i>Bacteroidia bacterium</i>      | Uncharacterized protein                    |
| 323 | 192 | 0.01 | A0A1Q3QI00 | <i>Bacteroidia bacterium</i>      | Tricorn protease homolog (EC 3.4.21.-)     |
| 324 | 192 | 0.01 |            |                                   |                                            |
| 325 | 192 | 0.01 |            |                                   |                                            |
| 326 | 192 | 0.01 |            |                                   |                                            |
| 327 | 191 | 0.01 | F4BVJ0     | <i>Methanosaeta concilii</i>      | Uncharacterized protein                    |
| 328 | 191 | 0.01 | H8MSC8     | <i>Corallocooccus coralloides</i> | Tyrosidine synthase                        |
| 329 | 191 | 0.01 |            |                                   |                                            |
| 330 | 191 | 0.01 |            |                                   |                                            |
| 331 | 190 | 0.01 | A0A154DNE7 | <i>Acinetobacter baumannii</i>    | mRNA endoribonuclease LS (EC 3.1.-.-)      |
| 332 | 190 | 0.01 | A0A1Q3QFK3 | <i>Bacteroidia bacterium</i>      | Alpha-rhamnosidase                         |
| 333 | 190 | 0.01 | A0A1Q3QHQ6 | <i>Bacteroidia bacterium</i>      | SusC/RagA family protein                   |
| 334 | 190 | 0.01 | A0A1Q3QIM7 | <i>Bacteroidia bacterium</i>      | Uncharacterized protein                    |
| 335 | 190 | 0.01 |            |                                   |                                            |
| 336 | 189 | 0.01 | A0A0E3T6K6 | <i>Gordonia phage Gmala1</i>      | Tape measure protein                       |
| 337 | 189 | 0.01 | A0A1Q3Q9V8 | <i>Bacteroidia bacterium</i>      | TonB-dependent receptor                    |
| 338 | 189 | 0.01 |            |                                   |                                            |
| 339 | 189 | 0.01 |            |                                   |                                            |
| 340 | 189 | 0.01 |            |                                   |                                            |
| 341 | 189 | 0.01 |            |                                   |                                            |
| 342 | 189 | 0.01 |            |                                   |                                            |
| 343 | 188 | 0.01 | A0A1Q3QA64 | <i>Bacteroidia bacterium</i>      | Uncharacterized protein                    |
| 344 | 188 | 0.01 | A0A1Q3QD21 | <i>Bacteroidia bacterium</i>      | Beta-galactosidase (EC 3.2.1.23) (Lactase) |
| 345 | 188 | 0.01 | A0A1Q3QHZ1 | <i>Bacteroidia bacterium</i>      | Peptidase M10A/M12B                        |
| 346 | 188 | 0.01 | A0A1Q3QI69 | <i>Bacteroidia bacterium</i>      | Uncharacterized protein                    |
| 347 | 188 | 0.01 | A0A1Q3QIW6 | <i>Bacteroidia bacterium</i>      | Uncharacterized protein                    |

|     |     |      |            |                              |                                                                     |
|-----|-----|------|------------|------------------------------|---------------------------------------------------------------------|
| 348 | 188 | 0.01 | F4BZ38     | <i>Methanosaeta concilii</i> | Transposase, IS116/IS110/IS902 family                               |
| 349 | 188 | 0.01 |            |                              |                                                                     |
| 350 | 187 | 0.01 | A0A1Q3QD59 | <i>Bacteroidia bacterium</i> | Translation initiation factor IF-2                                  |
| 351 | 187 | 0.01 | F4BXQ5     | <i>Methanosaeta concilii</i> | Two-component hybrid sensor and regulator                           |
| 352 | 187 | 0.01 | F4BY09     | <i>Methanosaeta concilii</i> | DNA polymerase II large subunit (Pol II) (EC 2.7.7.7)               |
| 353 | 187 | 0.01 |            |                              |                                                                     |
| 354 | 187 | 0.01 |            |                              |                                                                     |
| 355 | 187 | 0.01 |            |                              |                                                                     |
| 356 | 187 | 0.01 |            |                              |                                                                     |
| 357 | 187 | 0.01 |            |                              |                                                                     |
| 358 | 186 | 0.01 | A0A151BT14 | <i>Branchiibius sp.</i>      | Mercuric reductase                                                  |
| 359 | 186 | 0.01 | A0A1Q3QCA7 | <i>Bacteroidia bacterium</i> | Glycosyl hydrolase family 31                                        |
| 360 | 186 | 0.01 | A0A1Q3QGC9 | <i>Bacteroidia bacterium</i> | Peptidase M16                                                       |
| 361 | 186 | 0.01 | F4BU80     | <i>Methanosaeta concilii</i> | Transposase, IS605 OrfB family                                      |
| 362 | 186 | 0.01 |            |                              |                                                                     |
| 363 | 185 | 0.01 | A0A1M3FLT2 | <i>Bacteroidia bacterium</i> | Uncharacterized protein                                             |
| 364 | 185 | 0.01 | A0A1M6WBE7 | <i>Fibrobacter sp. UWOS</i>  | Transposase (Or an inactivated derivative)                          |
| 365 | 185 | 0.01 | A0A1Q3QA25 | <i>Bacteroidia bacterium</i> | UvrABC system protein C (Protein UvrC) (Excinuclease ABC subunit C) |
| 366 | 185 | 0.01 | A0A1Q3QD60 | <i>Bacteroidia bacterium</i> | Alanine racemase (EC 5.1.1.1)                                       |
| 367 | 185 | 0.01 | A0A1Q3QFA7 | <i>Bacteroidia bacterium</i> | Glycoside hydrolase family 2                                        |
| 368 | 185 | 0.01 | A0A1Q3QG11 | <i>Bacteroidia bacterium</i> | Capsular biosynthesis protein                                       |
| 369 | 185 | 0.01 | A1W5C2     | <i>Acidovorax sp.</i>        | IstB domain protein ATP-binding protein                             |
| 370 | 184 | 0.01 | A0A1G4G461 | <i>Petrimonas mucosa</i>     | Outer membrane protein assembly factor BamA                         |
| 371 | 184 | 0.01 | A0A1Q3QAU4 | <i>Bacteroidia bacterium</i> | Uncharacterized protein                                             |
| 372 | 184 | 0.01 | A0A1Q3QB09 | <i>Bacteroidia bacterium</i> | Glycoside hydrolase                                                 |
| 373 | 184 | 0.01 | A0A1Q3QGV1 | <i>Bacteroidia bacterium</i> | Uncharacterized protein                                             |
| 374 | 184 | 0.01 | A1W6Q0     | <i>Acidovorax sp.</i>        | Integrase, catalytic region                                         |
| 375 | 184 | 0.01 |            |                              |                                                                     |
| 376 | 184 | 0.01 |            |                              |                                                                     |
| 377 | 184 | 0.01 |            |                              |                                                                     |
| 378 | 184 | 0.01 |            |                              |                                                                     |
| 379 | 183 | 0.01 | A0A0N0JFZ2 | <i>Novosphingobium sp.</i>   | Glutamate synthase                                                  |
| 380 | 183 | 0.01 | A0A1Q3QI34 | <i>Bacteroidia bacterium</i> | Uncharacterized protein                                             |
| 381 | 183 | 0.01 |            |                              |                                                                     |
| 382 | 183 | 0.01 |            |                              |                                                                     |
| 383 | 182 | 0.01 | A0A1Q3QBL5 | <i>Bacteroidia bacterium</i> | Uncharacterized protein                                             |



|     |     |      |            |                                             |                                                                                                             |
|-----|-----|------|------------|---------------------------------------------|-------------------------------------------------------------------------------------------------------------|
| 384 | 182 | 0.01 | A0A1Q3QF81 | <i>Bacteroidia bacterium</i>                | Uncharacterized protein                                                                                     |
| 385 | 182 | 0.01 | A0A1Q3QIV4 | <i>Bacteroidia bacterium</i>                | Uncharacterized protein                                                                                     |
| 386 | 182 | 0.01 | F0M493     | <i>Pseudarthrobacter phenanthrenivorans</i> | Uncharacterized protein                                                                                     |
| 387 | 182 | 0.01 | F4BWG4     | <i>Methanosaeta concilii</i>                | Uncharacterized protein                                                                                     |
| 388 | 182 | 0.01 |            |                                             |                                                                                                             |
| 389 | 182 | 0.01 |            |                                             |                                                                                                             |
| 390 | 181 | 0.01 | A0A1Q3QBI7 | <i>Bacteroidia bacterium</i>                | Uncharacterized protein                                                                                     |
| 391 | 181 | 0.01 | A0A1Q3QIS1 | <i>Bacteroidia bacterium</i>                | Uncharacterized protein                                                                                     |
| 392 | 181 | 0.01 | F4BW92     | <i>Methanosaeta concilii</i>                | Cation-transporting P-type ATPase                                                                           |
| 393 | 181 | 0.01 |            |                                             |                                                                                                             |
| 394 | 180 | 0.01 | C5CEK1     | <i>Kosmotoga olearia</i>                    | IstB domain protein ATP-binding protein                                                                     |
| 395 | 180 | 0.01 | F4BWW3     | <i>Methanosaeta concilii</i>                | Alanine--tRNA ligase (EC 6.1.1.7) (Alanyl-tRNA synthetase) (AlaRS)                                          |
| 396 | 180 | 0.01 | F4BXD3     | <i>Methanosaeta concilii</i>                | S-layer-related duplication domain protein                                                                  |
| 397 | 180 | 0.01 |            |                                             |                                                                                                             |
| 398 | 179 | 0.01 | A0A1Q3QBV2 | <i>Bacteroidia bacterium</i>                | Serine protease                                                                                             |
| 399 | 179 | 0.01 | A0A1Q3QF68 | <i>Bacteroidia bacterium</i>                | Glycoside hydrolase                                                                                         |
| 400 | 179 | 0.01 |            |                                             |                                                                                                             |
| 401 | 179 | 0.01 |            |                                             |                                                                                                             |
| 402 | 178 | 0.01 | A0A1Q3QAC3 | <i>Bacteroidia bacterium</i>                | Leucine--tRNA ligase (Fragment)                                                                             |
| 403 | 178 | 0.01 | A0A1Q3QF16 | <i>Bacteroidia bacterium</i>                | Beta-galactosidase (EC 3.2.1.23) (Lactase)                                                                  |
| 404 | 178 | 0.01 | A0A1Q3QFY4 | <i>Bacteroidia bacterium</i>                | Uncharacterized protein                                                                                     |
| 405 | 178 | 0.01 | A0A1Q3QIH3 | <i>Bacteroidia bacterium</i>                | Uncharacterized protein                                                                                     |
| 406 | 178 | 0.01 | H8MH05     | <i>Corallococcus coralloides</i>            | Long-chain-fatty-acid--CoA ligase                                                                           |
| 407 | 178 | 0.01 |            |                                             |                                                                                                             |
| 408 | 178 | 0.01 |            |                                             |                                                                                                             |
| 409 | 177 | 0.01 | A0A1Q3QAJ9 | <i>Bacteroidia bacterium</i>                | Uncharacterized protein                                                                                     |
| 410 | 177 | 0.01 | A0A1Q3QGA2 | <i>Bacteroidia bacterium</i>                | Ferrous iron transport protein B                                                                            |
| 411 | 177 | 0.01 | A0A1Q3QIL1 | <i>Bacteroidia bacterium</i>                | Uncharacterized protein                                                                                     |
| 412 | 177 | 0.01 | A0A1Q3QIP6 | <i>Bacteroidia bacterium</i>                | Transcription-repair-coupling factor (TRCF) (EC 3.6.4.-)                                                    |
| 413 | 177 | 0.01 | A7AI47     | <i>Parabacteroides merdae</i>               | Uncharacterized protein                                                                                     |
| 414 | 177 | 0.01 | F4BYK4     | <i>Methanosaeta concilii</i>                | Leucine--tRNA ligase (EC 6.1.1.4) (Leucyl-tRNA synthetase) (LeuRS)                                          |
| 415 | 177 | 0.01 | P15689     | <i>Paramecium tetraurelia</i>               | NADH-ubiquinone oxidoreductase 49 kDa subunit (EC 1.6.5.3) (EC 1.6.99.3) (NADH dehydrogenase subunit 7)     |
| 416 | 177 | 0.01 | P11405     | <i>Moraxella sp.</i>                        | Type-2 restriction enzyme MspI (R.MspI) (EC 3.1.21.4) (Endonuclease MspI) (Type II restriction enzyme MspI) |

|     |     |      |            |                                             |                                                     |
|-----|-----|------|------------|---------------------------------------------|-----------------------------------------------------|
| 417 | 177 | 0.01 |            |                                             |                                                     |
| 418 | 177 | 0.01 |            |                                             |                                                     |
| 419 | 177 | 0.01 |            |                                             |                                                     |
| 420 | 177 | 0.01 |            |                                             |                                                     |
| 421 | 177 | 0.01 |            |                                             |                                                     |
| 422 | 176 | 0.01 | A0A1G4GAZ3 | <i>Petrimonas mucosa</i>                    | Uncharacterized protein                             |
| 423 | 176 | 0.01 | A0A1M6CEL6 | <i>Tessaracoccus bendigoensis</i>           | Uncharacterized protein                             |
| 424 | 176 | 0.01 | A0A1Q3QAR6 | <i>Bacteroidia bacterium</i>                | Mannose-6-phosphate isomerase                       |
| 425 | 176 | 0.01 |            |                                             |                                                     |
| 426 | 176 | 0.01 |            |                                             |                                                     |
| 427 | 175 | 0.01 | A0A1Q2CK56 | <i>Tessaracoccus sp.</i>                    | Uncharacterized protein                             |
| 428 | 175 | 0.01 | A0A1Q3QF30 | <i>Bacteroidia bacterium</i>                | Hydrolase                                           |
| 429 | 175 | 0.01 | A0A1Q3QGE3 | <i>Bacteroidia bacterium</i>                | Uncharacterized protein                             |
| 430 | 175 | 0.01 |            |                                             |                                                     |
| 431 | 175 | 0.01 |            |                                             |                                                     |
| 432 | 175 | 0.01 |            |                                             |                                                     |
| 433 | 174 | 0.01 | F4BVH9     | <i>Methanosaeta concilii</i>                | Glycosyl transferase, group 2 family protein        |
| 434 | 174 | 0.01 | N1JKD7     | <i>Mesotoga infera</i>                      | RNA-directed DNA polymerase (Reverse transcriptase) |
| 435 | 174 | 0.01 |            |                                             |                                                     |
| 436 | 173 | 0.01 | A0A1Q3QBX1 | <i>Bacteroidia bacterium</i>                | Polysaccharide biosynthesis protein                 |
| 437 | 173 | 0.01 | A0A1Q3QGI1 | <i>Bacteroidia bacterium</i>                | Uncharacterized protein                             |
| 438 | 173 | 0.01 | A0A1Q3QHE9 | <i>Bacteroidia bacterium</i>                | Glycosyl transferase                                |
| 439 | 173 | 0.01 | F4BTH0     | <i>Methanosaeta concilii</i>                | Glycosyl transferase, group 2 family protein        |
| 440 | 173 | 0.01 | F4BTY4     | <i>Methanosaeta concilii</i>                | SNF2 family helicase (EC 3.6.1.-)                   |
| 441 | 173 | 0.01 |            |                                             |                                                     |
| 442 | 173 | 0.01 |            |                                             |                                                     |
| 443 | 172 | 0.01 | A0A180EWA0 | <i>Bacteroidales bacterium</i>              | Replication protein                                 |
| 444 | 172 | 0.01 | A0A1Q3QH96 | <i>Bacteroidia bacterium</i>                | PAS domain-containing sensor histidine kinase       |
| 445 | 172 | 0.01 | F0M490     | <i>Pseudarthrobacter phenanthrenivorans</i> | DNA primase/polymerase-like protein                 |
| 446 | 172 | 0.01 | F4BSY5     | <i>Methanosaeta concilii</i>                | Uncharacterized protein                             |
| 447 | 172 | 0.01 |            |                                             |                                                     |
| 448 | 172 | 0.01 |            |                                             |                                                     |
| 449 | 171 | 0.01 | A0A1Q3Q9R3 | <i>Bacteroidia bacterium</i>                | DUF5107 domain-containing protein                   |
| 450 | 171 | 0.01 | A0A1Q3QGP8 | <i>Bacteroidia bacterium</i>                | Glycoside hydrolase                                 |
| 451 | 171 | 0.01 | F4BUE7     | <i>Methanosaeta concilii</i>                | Uncharacterized protein                             |

|     |     |      |            |                                         |                                                                                                       |
|-----|-----|------|------------|-----------------------------------------|-------------------------------------------------------------------------------------------------------|
| 452 | 171 | 0.01 |            |                                         |                                                                                                       |
| 453 | 171 | 0.01 |            |                                         |                                                                                                       |
| 454 | 171 | 0.01 |            |                                         |                                                                                                       |
| 455 | 170 | 0.01 | A0A1Q3QEW4 | <i>Bacteroidia bacterium</i>            | Alanine--tRNA ligase (EC 6.1.1.7) (Alanyl-tRNA synthetase) (AlaRS)                                    |
| 456 | 170 | 0.01 | A0A1Q3QGC5 | <i>Bacteroidia bacterium</i>            | Uncharacterized protein                                                                               |
| 457 | 170 | 0.01 | A0A1Q3QGL6 | <i>Bacteroidia bacterium</i>            | Copper-translocating P-type ATPase                                                                    |
| 458 | 170 | 0.01 | A0A1Q3QID2 | <i>Bacteroidia bacterium</i>            | Uncharacterized protein                                                                               |
| 459 | 170 | 0.01 | D8L7R1     | <i>Paramecium caudatum</i>              | NADH-ubiquinone oxidoreductase chain 4 (EC 1.6.5.3)                                                   |
| 460 | 170 | 0.01 | F4BY71     | <i>Methanosaeta concilii</i>            | WD40-like Beta Propeller Repeat protein                                                               |
| 461 | 170 | 0.01 | I4ZNR1     | <i>Acinetobacter sp.</i>                | Uncharacterized protein (Fragment)                                                                    |
| 462 | 170 | 0.01 | I8W058     | <i>Bacteroides cellulosilyticus</i>     | Uncharacterized protein                                                                               |
| 463 | 169 | 0.01 | A0A098BYW1 | <i>Fermentimonas caenicola</i>          | Transposase                                                                                           |
| 464 | 169 | 0.01 | A0A1G4G8N7 | <i>Petrimonas mucosa</i>                | ATP-dependent DNA helicase RecQ (EC 3.6.4.12)                                                         |
| 465 | 169 | 0.01 | A0A1Q3QBS3 | <i>Bacteroidia bacterium</i>            | Uncharacterized protein                                                                               |
| 466 | 169 | 0.01 | A0A1Q3QFW3 | <i>Bacteroidia bacterium</i>            | Alpha-mannosidase                                                                                     |
| 467 | 169 | 0.01 | A0A1Q3QIT0 | <i>Bacteroidia bacterium</i>            | Polyphosphate kinase (EC 2.7.4.1) (ATP-polyphosphate phosphotransferase) (Polyphosphoric acid kinase) |
| 468 | 169 | 0.01 |            |                                         |                                                                                                       |
| 469 | 169 | 0.01 | V2USD3     | <i>Acinetobacter brisouii</i>           | Uncharacterized protein                                                                               |
| 470 | 169 | 0.01 | W9GKA2     | <i>Intrasporangium chromatireducens</i> | DNA primase (EC 2.7.7.-)                                                                              |
| 471 | 168 | 0.01 | A0A023UP33 | <i>Magnusiomyces ingens</i>             | Uncharacterized protein (Fragment)                                                                    |
| 472 | 168 | 0.01 | A0A1Q3Q9X7 | <i>Bacteroidia bacterium</i>            | Uncharacterized protein                                                                               |
| 473 | 168 | 0.01 | A0A1Q3QFZ4 | <i>Bacteroidia bacterium</i>            | Uncharacterized protein                                                                               |
| 474 | 168 | 0.01 | F1Z7R9     | <i>Novosphingobium nitrogenifigens</i>  | Type-IV secretion system protein TraC                                                                 |
| 475 | 168 | 0.01 | F4BTS2     | <i>Methanosaeta concilii</i>            | M6 family metalloprotease domain protein                                                              |
| 476 | 168 | 0.01 | F4BVQ0     | <i>Methanosaeta concilii</i>            | Uncharacterized protein                                                                               |
| 477 | 168 | 0.01 |            |                                         |                                                                                                       |
| 478 | 168 | 0.01 |            |                                         |                                                                                                       |
| 479 | 168 | 0.01 |            |                                         |                                                                                                       |
| 480 | 167 | 0.01 | A0A0M3AFY3 | <i>Acinetobacter sp. AG1</i>            | Cytochrome C peroxidase                                                                               |
| 481 | 167 | 0.01 | A0A1Q3QAM8 | <i>Bacteroidia bacterium</i>            | Uncharacterized protein                                                                               |
| 482 | 167 | 0.01 | A0A1Q3QC30 | <i>Bacteroidia bacterium</i>            | 4-alpha-glucanotransferase                                                                            |
| 483 | 167 | 0.01 | A0A1Q3QC51 | <i>Bacteroidia bacterium</i>            | Valine--tRNA ligase (EC 6.1.1.9) (Valyl-tRNA synthetase) (ValRS)                                      |
| 484 | 167 | 0.01 | A0A1Q3QCU6 | <i>Bacteroidia bacterium</i>            | Uncharacterized protein                                                                               |
| 485 | 167 | 0.01 | F4BXE8     | <i>Methanosaeta concilii</i>            | Conserved domain protein                                                                              |
| 486 | 167 | 0.01 | F4BZQ7     | <i>Methanosaeta concilii</i>            | S-layer-related duplication domain protein                                                            |

|     |     |      |            |                                   |                                                                                                                                          |
|-----|-----|------|------------|-----------------------------------|------------------------------------------------------------------------------------------------------------------------------------------|
| 487 | 167 | 0.01 | A6LE80     | <i>Parabacteroides distasonis</i> | DNA-directed RNA polymerase subunit beta' (RNAP subunit beta') (EC 2.7.7.6) (RNA polymerase subunit beta') (Transcriptase subunit beta') |
| 488 | 167 | 0.01 |            |                                   |                                                                                                                                          |
| 489 | 167 | 0.01 |            |                                   |                                                                                                                                          |
| 490 | 166 | 0.01 | A0A1Q3QC45 | <i>Bacteroidia bacterium</i>      | Uncharacterized protein                                                                                                                  |
| 491 | 166 | 0.01 | A0A1Q3QFI3 | <i>Bacteroidia bacterium</i>      | DNA topoisomerase IV                                                                                                                     |
| 492 | 166 | 0.01 | F4BU69     | <i>Methanosaeta concilii</i>      | Hydrophobe/amphiphile efflux-3 (HAE3) family transporter                                                                                 |
| 493 | 166 | 0.01 | F4BXP6     | <i>Methanosaeta concilii</i>      | IS66 family element, transposase                                                                                                         |
| 494 | 166 | 0.01 | F4C0R1     | <i>Methanosaeta concilii</i>      | Uncharacterized protein                                                                                                                  |
| 495 | 166 | 0.01 | H8MK59     | <i>Corallococcus coralloides</i>  | Linear gramicidin synthase subunit C                                                                                                     |
| 496 | 166 | 0.01 |            |                                   |                                                                                                                                          |
| 497 | 165 | 0.01 | A0A1Q3QDR2 | <i>Bacteroidia bacterium</i>      | Uncharacterized protein                                                                                                                  |
| 498 | 165 | 0.01 | A0A1Q3QEA7 | <i>Bacteroidia bacterium</i>      | Acridine resistance protein B                                                                                                            |
| 499 | 165 | 0.01 | A0A1Q3QGG3 | <i>Bacteroidia bacterium</i>      | Hydrolase                                                                                                                                |
| 500 | 165 | 0.01 | F4BWB4     | <i>Methanosaeta concilii</i>      | TPR-repeat protein                                                                                                                       |
